# Supplementary material for: Multi-omics analysis reveals the specific role of biocontrol reagents against tomato bacterial wilt
Source: Front Plant Sci. 2025 Jul 14;16:1620460. doi: 10.3389/fpls.2025.1620460 (PMC12301371; doi:10.3389/fpls.2025.1620460)
Supplement: Supplementary file 1 [file Table1.xls]

gene_id	Treat4_1	Treat4_2	Treat4_3	CK_1	CK_2	CK_3	Treat4	CK	log2FoldChange	p-value	padj	gene_name	gene_chr	gene_start	gene_end	gene_strand	gene_length	gene_biotype	gene_description	Family
Solyc08g077910_3	623.399856	548.455511	676.0544437	17129.71812	16903.24183	16234.97935	615.9699369	16755.97977	-4.761643848	0	0	Solyc08g077910_3	8	61933436	61936837	+	2159	protein_coding	NA && sp|O23547|EXLB1_ARATH Expansin-like B1 OS=Arabidopsis thaliana OX=3702 GN=EXLB1 PE=2 SV=2 && PF03330:Lytic transglycolase|PF01357:Pollen allergen	bHLH
Solyc02g090360_3	9512.938492	9582.095099	9284.936283	991.1571897	988.875688	881.1654348	9459.989958	953.7327708	3.31109762	0	0	Solyc02g090360_3	2	52555217	52558328	-	2044	protein_coding	NA && sp|P29162|ASOL_TOBAC L-ascorbate oxidase homolog OS=Nicotiana tabacum OX=4097 PE=2 SV=1 && PF07731:Multicopper oxidase|PF00394:Multicopper oxidase|PF07732:Multicopper oxidase	bHLH
Solyc04g082140_3	4899.779558	4837.954929	4952.041893	417.1364208	440.0008756	446.635553	4896.592127	434.5909498	3.493589011	0	0	Solyc04g082140_3	4	66003841	66008652	-	1971	protein_coding	NA && sp|Q00624|ASOL_BRANA L-ascorbate oxidase homolog OS=Brassica napus OX=3708 GN=Bp10 PE=2 SV=1 && PF07731:Multicopper oxidase|PF00394:Multicopper oxidase|PF07732:Multicopper oxidase	bHLH
Solyc04g082200_2	5355.506349	5858.37084	5379.98208	703.0471486	701.2983239	669.6347592	5531.286423	691.3267439	3.000477498	0	0	Solyc04g082200_2	4	66043586	66044958	-	1157	nontranslating_CDS	NA && - && PF00257:Dehydrin	-
Solyc11g071760_2	4280.679011	3957.539503	4256.63909	409.0722721	403.9598482	414.141383	4164.952535	409.0578344	3.347816284	0	0	Solyc11g071760_2	11	55432314	55437016	-	1416	protein_coding	NA && sp|Q9SRE6|CML38_ARATH Calcium-binding protein CML38 OS=Arabidopsis thaliana OX=3702 GN=CML38 PE=1 SV=1 && PF13833:EF-hand domain pair|PF13499:EF-hand domain pair	FAR1
Solyc12g044950_2	293.786139	342.0630424	249.2523959	4361.238255	4894.071173	4939.113847	295.0338591	4731.474425	-4.011181008	0	0	Solyc12g044950_2	12	61236791	61237892	-	1035	protein_coding	NA && sp|Q8GZC3|FAD2_VERFO Delta(12)-fatty-acid desaturase FAD2 OS=Vernicia fordii OX=73154 GN=FAD2 PE=1 SV=1 && PF11960:Domain of unknown function (DUF3474)|PF00487:Fatty acid desaturase	HSF
Solyc03g093130_3	6544.981936	6321.671417	6231.309898	1051.271753	925.0530354	973.5508203	6365.98775	983.2918695	2.694558828	1.95E-287	5.60E-284	Solyc03g093130_3	3	55733462	55735427	-	1789	protein_coding	NA && sp|Q38910|XTH23_ARATH Probable xyloglucan endotransglucosylase/hydrolase protein 23 OS=Arabidopsis thaliana OX=3702 GN=XTH23 PE=2 SV=1 && PF00722:Glycosyl hydrolases family 16|PF06955:Xyloglucan endo-transglycosylase (XET) C-terminus	ERF
Solyc09g097780_3	88.85239326	116.9076221	121.780851	3440.459091	2929.084327	2969.712286	109.1802888	3113.085235	-4.825317651	4.49E-287	1.13E-283	Solyc09g097780_3	9	72290467	72295832	+	848	protein_coding	NA && sp|P23137|GRP1_TOBAC Glycine-rich protein OS=Nicotiana tabacum OX=4097 GN=GRP PE=2 SV=1 && PF07172:Glycine rich protein family	-
Solyc03g119530_3	468.6247193	441.6510168	512.1624574	4157.435224	3903.693775	4202.579326	474.1460645	4087.902775	-3.104470633	1.02E-264	2.28E-261	Solyc03g119530_3	3	69594152	69603197	+	2864	protein_coding	NA && sp|Q9M886|LBD41_ARATH LOB domain-containing protein 41 OS=Arabidopsis thaliana OX=3702 GN=LBD41 PE=2 SV=1 && PF03195:Lateral organ boundaries (LOB) domain	LBD
Solyc02g077880_3	1268.296259	1407.221377	1276.991727	7482.063815	7308.06915	7595.990104	1317.503121	7462.041023	-2.502660632	2.00E-262	4.01E-259	Solyc02g077880_3	2	43281365	43282542	+	867	protein_coding	NA && sp|P93017|DRMH1_ARATH Dormancy-associated protein homolog 1 OS=Arabidopsis thaliana OX=3702 GN=DRMH1 PE=1 SV=1 && PF05564:Dormancy/auxin associated protein	-
Solyc01g057770_3	3635.782608	4068.67391	3788.864046	502.9096391	487.304724	438.989866	3831.106854	476.4014097	3.008735133	7.31E-256	1.33E-252	Solyc01g057770_3	1	63672035	63680464	+	7210	protein_coding	NA && sp|Q8VYR7|BOR1_ARATH Boron transporter 1 OS=Arabidopsis thaliana OX=3702 GN=BOR1 PE=1 SV=1 && -	HD-ZIP
Solyc01g102350_3	1989.147127	1955.676888	1716.313302	59.38145885	82.59402102	64.9883401	1887.045772	68.98793999	4.776226831	2.01E-250	3.36E-247	Solyc01g102350_3	1	91057118	91062557	-	2130	protein_coding	NA && sp|Q66GM8|PAE10_ARATH Pectin acetylesterase 10 OS=Arabidopsis thaliana OX=3702 GN=PAE10 PE=2 SV=1 && PF03283:Pectinacetylesterase	bHLH
Solyc02g079500_3	924.3515106	723.0952922	793.2827395	5929.348632	6003.083618	5955.353087	813.5765141	5962.595112	-2.874204033	2.39E-242	3.68E-239	Solyc02g079500_3	2	44595355	44602184	-	2414	protein_coding	NA && sp|P15003|PER1_SOLLC Suberization-associated anionic peroxidase 1 OS=Solanum lycopersicum OX=4081 GN=TAP1 PE=3 SV=1 && PF00141:Peroxidase	NAC
Solyc06g059740_3	1486.127932	1412.994593	1709.484469	9759.086175	9399.199592	9276.129838	1536.202331	9478.138535	-2.623026474	1.06E-239	1.52E-236	Solyc06g059740_3	6	37722996	37725472	+	1783	protein_coding	NA && sp|P28032|ADH2_SOLLC Alcohol dehydrogenase 2 OS=Solanum lycopersicum OX=4081 GN=ADH2 PE=2 SV=2 && PF00107:Zinc-binding dehydrogenase|PF08240:Alcohol dehydrogenase GroES-like domain	GRF
Solyc07g005630_3	98.88411508	165.9799573	124.0571286	2874.502471	2827.718938	2526.899577	129.6404003	2743.040328	-4.406271209	2.98E-234	3.98E-231	Solyc07g005630_3	7	509651	513189	-	541	protein_coding	NA && - && -	-
Solyc09g092520_3	2828.945553	2918.36064	2828.274903	328.4307847	259.0448841	312.8360293	2858.527032	300.1038994	3.250366158	1.24E-232	1.55E-229	Solyc09g092520_3	9	72053343	72055598	-	1265	protein_coding	NA && sp|P35694|XTH2_SOYBN Xyloglucan endotransglucosylase/hydrolase 2 OS=Glycine max OX=3847 PE=2 SV=1 && PF06955:Xyloglucan endo-transglycosylase (XET) C-terminus|PF00722:Glycosyl hydrolases family 16	NAC
Solyc07g052510_3	4124.470771	4275.066378	4241.843286	770.4927562	807.1688418	757.5601605	4213.793478	778.4072528	2.437039405	1.16E-231	1.37E-228	Solyc07g052510_3	7	61147712	61171722	+	4213	protein_coding	NA && sp|O23044|PER3_ARATH Peroxidase 3 OS=Arabidopsis thaliana OX=3702 GN=PER3 PE=2 SV=1 && PF00141:Peroxidase	NAC
Solyc06g074420_1	1663.832719	1744.954507	1800.535572	72.57733859	48.05470314	45.23698183	1736.440933	55.28967452	4.979292332	3.32E-231	3.70E-228	Solyc06g074420_1	6	46194906	46196363	+	1458	protein_coding	NA && sp|Q9ZUX1|C94C1_ARATH Cytochrome P450 94C1 OS=Arabidopsis thaliana OX=3702 GN=CYP94C1 PE=1 SV=1 && PF00067:Cytochrome P450	C2H2
Solyc07g005330_3	2761.589707	2928.463768	3030.863609	328.4307847	306.3487325	368.2672606	2906.972361	334.3489259	3.1182899	4.49E-228	4.74E-225	Solyc07g005330_3	7	261295	264497	-	1585	protein_coding	NA && sp|P52409|E13B_WHEAT Glucan endo-1,3-beta-glucosidase OS=Triticum aestivum OX=4565 GN=GLC1 PE=2 SV=1 && PF07983:X8 domain|PF00332:Glycosyl hydrolases family 17	BES1
Solyc02g083880_3	2529.427002	2505.575703	2443.583991	142.2222595	88.60085891	148.4537573	2492.862232	126.4256252	4.29594459	2.92E-223	2.92E-220	Solyc02g083880_3	2	47692654	47693313	+	485	protein_coding	NA && sp|F4IQJ4|GASAB_ARATH Gibberellin-regulated protein 11 OS=Arabidopsis thaliana OX=3702 GN=GASA11 PE=3 SV=1 && PF02704:Gibberellin regulated protein	-
Solyc07g009230_3	7465.034137	7333.427504	6740.057939	43434.23818	39997.28096	40207.39402	7179.506527	41212.97105	-2.521400987	5.15E-220	4.92E-217	Solyc07g009230_3	7	4263182	4264706	+	772	protein_coding	NA && - && -	-
Solyc07g042170_3	4383.862435	4520.428054	4140.548933	850.4011391	826.6910649	827.0084848	4348.279808	834.7002296	2.380794107	6.13E-216	5.59E-213	Solyc07g042170_3	7	55305593	55306887	+	1145	protein_coding	NA && sp|Q8H395|TI10B_ORYSJ Protein TIFY 10b OS=Oryza sativa subsp. japonica OX=39947 GN=TIFY10B PE=1 SV=1 && PF09425:Divergent CCT motif|PF06200:tify domain	-
Solyc07g062700_3	7919.327825	8135.904515	7834.947459	1692.005025	1568.535545	1789.727915	7963.393266	1683.422828	2.241356238	6.47E-215	5.64E-212	Solyc07g062700_3	7	65508462	65515692	-	4082	protein_coding	NA && sp|Q8L636|NCL_ARATH Sodium/calcium exchanger NCL OS=Arabidopsis thaliana OX=3702 GN=NCL PE=2 SV=1 && PF13499:EF-hand domain pair|PF01699:Sodium/calcium exchanger protein	bZIP
Solyc02g077420_3	2436.275299	2587.84403	2736.085661	317.4342183	295.0859114	339.595934	2586.734997	317.3720213	3.025845789	7.57E-209	6.32E-206	Solyc02g077420_3	2	42928352	42929949	-	1511	protein_coding	NA && sp|A2WT95|PLA1_ORYSI Phospholipase A1-II 1 OS=Oryza sativa subsp. indica OX=39946 GN=OsI_03083 PE=3 SV=2 && PF01764:Lipase (class 3)	Trihelix
Solyc07g064820_1	1759.850628	1705.9853	1622.98592	80.64148732	105.1196631	68.81118363	1696.273949	84.85744469	4.327879259	1.65E-202	1.32E-199	Solyc07g064820_1	7	66936441	66937913	-	1473	protein_coding	NA && sp|Q9ZVP5|M3K18_ARATH Mitogen-activated protein kinase kinase kinase 18 OS=Arabidopsis thaliana OX=3702 GN=MAPKKK18 PE=1 SV=1 && PF00069:Protein kinase domain	NF-YC
Solyc01g106630_2	1592.177563	1997.532703	1696.964942	9840.460767	9882.750042	9919.641833	1762.22507	9880.950881	-2.487907049	3.77E-202	2.91E-199	Solyc01g106630_2	1	94321306	94324378	-	893	protein_coding	NA && sp|P11670|PRB1_TOBAC Basic form of pathogenesis-related protein 1 OS=Nicotiana tabacum OX=4097 PE=3 SV=1 && PF00188:Cysteine-rich secretory protein family	M-type_MADS
Solyc01g079880_3	898.5556545	886.1886415	961.727281	4769.577423	4740.145952	4509.04395	915.4905257	4672.922441	-2.349975014	2.51E-201	1.87E-198	Solyc01g079880_3	1	78883463	78887702	-	1227	protein_coding	NA && sp|P24805|TSJT1_TOBAC Stem-specific protein TSJT1 OS=Nicotiana tabacum OX=4097 GN=TSJT1 PE=2 SV=1 && PF12481:Aluminium induced protein	-
Solyc02g092790_3	5591.968363	5315.688545	5582.570785	829.1411106	834.1996123	1014.327818	5496.742565	892.5561803	2.621299695	3.66E-199	2.62E-196	Solyc02g092790_3	2	54399306	54405345	+	3748	protein_coding	NA && sp|Q9SNV9|NRAM3_ARATH Metal transporter Nramp3 OS=Arabidopsis thaliana OX=3702 GN=NRAMP3 PE=1 SV=2 && PF01566:Natural resistance-associated macrophage protein	-
Solyc07g009260_3	37.26068105	40.41251134	22.76277588	2348.13349	2055.089414	1984.692935	33.47865609	2129.30528	-6.021777799	4.82E-199	3.33E-196	Solyc07g009260_3	7	4313921	4315522	-	464	protein_coding	NA && sp|P82787|DEF19_ARATH Defensin-like protein 19 OS=Arabidopsis thaliana OX=3702 GN=PDF1.4 PE=3 SV=2 && -	-
Solyc12g042380_2	1894.562321	1632.376797	1831.26532	8039.223182	8320.97219	8187.256571	1786.068146	8182.483981	-2.19521529	1.93E-194	1.29E-191	Solyc12g042380_2	12	58502750	58506205	+	2097	protein_coding	NA && - && PF07712:Stress up-regulated Nod 19	-
Solyc07g056000_3	6532.084008	6330.331241	6542.021789	1653.15049	1696.931705	1635.539892	6468.145679	1661.874029	1.960799196	4.07E-194	2.63E-191	Solyc07g056000_3	7	64022163	64033504	+	1964	protein_coding	NA && sp|Q38911|XTH15_ARATH Xyloglucan endotransglucosylase/hydrolase protein 15 OS=Arabidopsis thaliana OX=3702 GN=XTH15 PE=1 SV=1 && PF06955:Xyloglucan endo-transglycosylase (XET) C-terminus|PF00722:Glycosyl hydrolases family 16	NAC
Solyc11g062440_2	2667.004901	2638.359669	2913.635313	381.9474081	386.6901893	320.4817164	2739.666628	363.0397713	2.918423803	1.58E-187	9.88E-185	Solyc11g062440_2	11	49795914	49802478	-	2191	protein_coding	NA && sp|Q40588|ASO_TOBAC L-ascorbate oxidase OS=Nicotiana tabacum OX=4097 GN=AAO PE=2 SV=1 && PF07731:Multicopper oxidase|PF07732:Multicopper oxidase|PF00394:Multicopper oxidase	bHLH
Solyc01g111440_3	2770.188325	2683.102092	3239.143008	307.1707563	338.6354862	379.7357912	2897.477809	341.8473445	3.08247403	2.44E-181	1.48E-178	Solyc01g111440_3	1	97593986	97597058	+	1770	protein_coding	NA && sp|O48832|ERD7_ARATH Protein EARLY-RESPONSIVE TO DEHYDRATION 7, chloroplastic OS=Arabidopsis thaliana OX=3702 GN=ERD7 PE=1 SV=1 && PF06911:Senescence-associated protein	bZIP
Solyc01g006430_3	1867.333362	1808.459882	1726.556551	7064.19429	7343.359323	7621.475728	1800.783265	7343.00978	-2.028662916	4.10E-181	2.42E-178	Solyc01g006430_3	1	1033439	1038597	-	1319	protein_coding	NA && sp|Q84VT2|FAD12_PUNGR Delta(12)-acyl-lipid-desaturase OS=Punica granatum OX=22663 GN=FAD12 PE=2 SV=2 && PF00487:Fatty acid desaturase|PF11960:Domain of unknown function (DUF3474)	HSF
Solyc09g091000_3	174.8385803	252.5781959	166.1682639	2420.710829	2418.503106	2554.296622	197.86168	2464.503519	-3.647275182	2.88E-180	1.65E-177	Solyc09g091000_3	9	70835820	70836676	+	550	protein_coding	NA && sp|P17642|PRS2_SOLTU Pathogenesis-related protein STH-2 OS=Solanum tuberosum OX=4113 GN=STH-2 PE=2 SV=1 && PF00407:Pathogenesis-related protein Bet v I family	-
Solyc01g108240_3	2302.996709	2085.574246	1757.286298	115.8305	85.59743996	66.26262128	2048.619084	89.23018707	4.526429822	4.47E-180	2.49E-177	Solyc01g108240_3	1	95501843	95503129	+	1287	protein_coding	NA && sp|Q9SZ06|EF109_ARATH Ethylene-responsive transcription factor ERF109 OS=Arabidopsis thaliana OX=3702 GN=ERF109 PE=1 SV=1 && PF00847:AP2 domain	ERF
Solyc09g090970_3	1203.806618	1052.168599	1241.709424	5600.917847	5990.319088	5554.591657	1165.894881	5715.276197	-2.291717722	9.39E-175	5.08E-172	Solyc09g090970_3	9	70821547	70832461	-	1491	protein_coding	NA && sp|P17642|PRS2_SOLTU Pathogenesis-related protein STH-2 OS=Solanum tuberosum OX=4113 GN=STH-2 PE=2 SV=1 && PF00407:Pathogenesis-related protein Bet v I family	-
Solyc06g074670_3	1961.918167	2459.389976	2511.872319	112.1649778	178.7034273	142.719492	2311.060154	144.529299	4.000581103	2.40E-172	1.27E-169	Solyc06g074670_3	6	46350099	46354335	-	1825	protein_coding	NA && sp|Q9SGE0|AXS2_ARATH UDP-D-apiose/UDP-D-xylose synthase 2 OS=Arabidopsis thaliana OX=3702 GN=AXS2 PE=2 SV=1 && PF01370:NAD dependent epimerase/dehydratase family	Trihelix
Solyc02g089610_2	5002.962982	5060.223741	4880.339149	477.9840885	632.9705429	396.9385871	4981.175291	502.6310728	3.311071409	1.04E-170	5.34E-168	Solyc02g089610_2	2	52005578	52006969	-	1392	protein_coding	NA && sp|Q96471|DCAM_IPONI S-adenosylmethionine decarboxylase proenzyme OS=Ipomoea nil OX=35883 GN=SAMDC PE=3 SV=1 && PF01536:Adenosylmethionine decarboxylase	-
Solyc10g083970_1	2447.740124	2606.606981	2503.905347	384.8798259	295.8367662	298.1817957	2519.417484	326.2994626	2.949832824	2.36E-161	1.18E-158	Solyc10g083970_1	10	63789458	63790630	-	1173	protein_coding	NA && sp|P43282|METK3_SOLLC S-adenosylmethionine synthase 3 OS=Solanum lycopersicum OX=4081 GN=SAM3 PE=2 SV=1 && PF00438:S-adenosylmethionine synthetase, N-terminal domain|PF02772:S-adenosylmethionine synthetase, central domain|PF02773:S-adenosylmethionine synthetase, C-terminal domain	-
Solyc04g074450_2	11672.62489	12009.73239	11317.65217	3746.163638	3789.563855	3704.335386	11666.66982	3746.687626	1.638628619	2.12E-149	1.04E-146	Solyc04g074450_2	4	60517362	60524782	-	2601	protein_coding	NA && sp|O82161|PHI1_TOBAC Protein PHOSPHATE-INDUCED 1 OS=Nicotiana tabacum OX=4097 GN=PHI-1 PE=2 SV=1 && PF04674:Phosphate-induced protein 1 conserved region	MYB
Solyc04g005480_1	3468.109544	3829.085449	3705.779914	407.6060632	552.6290861	574.7008114	3667.658302	511.6453202	2.84061577	1.11E-146	5.28E-144	Solyc04g005480_1	4	323319	323831	-	513	protein_coding	NA && sp|Q9ZQ80|NDRP1_ARATH Nodulin-related protein 1 OS=Arabidopsis thaliana OX=3702 GN=NRP1 PE=1 SV=1 && -	-
Solyc02g084240_3	491.5543692	496.4965679	425.663909	2629.645591	2961.371081	2630.753493	471.238282	2740.590055	-2.543360021	3.40E-141	1.58E-138	Solyc02g084240_3	2	47952694	47953856	+	1032	protein_coding	NA && sp|P40267|H1_SOLPN Histone H1 OS=Solanum pennellii OX=28526 PE=2 SV=1 && PF00538:linker histone H1 and H5 family	BBR-BPC
Solyc02g092670_2	1480.39552	1558.768295	1758.424437	60.84766771	59.31752418	107.039619	1599.196084	75.73493696	4.390067557	1.30E-140	5.90E-138	Solyc02g092670_2	2	54315919	54324084	-	4479	protein_coding	NA && sp|O65351|SBT17_ARATH Subtilisin-like protease SBT1.7 OS=Arabidopsis thaliana OX=3702 GN=SBT1.7 PE=1 SV=1 && PF05922:Peptidase inhibitor I9|PF00082:Subtilase family|PF02225:PA domain|PF17766:Fibronectin type-III domain	bHLH
Solyc08g079090_3	1278.327981	1425.984329	1516.000874	98.23599365	117.8841936	77.09401129	1406.771061	97.73806619	3.853888893	5.16E-140	2.30E-137	Solyc08g079090_3	8	62856357	62860553	+	2598	protein_coding	NA && sp|Q9SU40|SKU5_ARATH Monocopper oxidase-like protein SKU5 OS=Arabidopsis thaliana OX=3702 GN=SKU5 PE=1 SV=1 && PF07732:Multicopper oxidase|PF00394:Multicopper oxidase|PF07731:Multicopper oxidase	bHLH
Solyc12g009220_2	2088.031242	2395.884601	1975.808947	322.5659493	313.1064251	268.8733286	2153.241596	301.5152344	2.837299955	5.04E-139	2.20E-136	Solyc12g009220_2	12	2502493	2504654	+	858	protein_coding	NA && sp|Q9LMA8|TI10A_ARATH Protein TIFY 10A OS=Arabidopsis thaliana OX=3702 GN=TIFY10A PE=1 SV=1 && PF09425:Divergent CCT motif|PF06200:tify domain	-
Solyc06g034370_1	1328.48659	1120.003886	1314.550307	92.37115821	98.36197048	110.8624625	1254.346928	100.5318637	3.638947993	2.26E-138	9.65E-136	Solyc06g034370_1	6	24270678	24271256	-	579	protein_coding	NA && sp|P17407|21KD_DAUCA 21 kDa protein OS=Daucus carota OX=4039 PE=2 SV=1 && PF04043:Plant invertase/pectin methylesterase inhibitor	Trihelix
Solyc08g080290_3	1549.18447	1052.168599	1147.243904	38.12143037	48.80555787	28.67132651	1249.532324	38.53277159	5.028645856	1.08E-137	4.53E-135	Solyc08g080290_3	8	63728129	63729634	-	1222	protein_coding	NA && sp|Q9FJ90|ERF25_ARATH Ethylene-responsive transcription factor ERF025 OS=Arabidopsis thaliana OX=3702 GN=ERF025 PE=2 SV=1 && PF00847:AP2 domain	ERF
Solyc03g093080_3	3665.877774	3894.034128	3655.701807	521.2372499	572.1513092	721.243147	3738.537903	604.8772354	2.625795187	5.06E-137	2.07E-134	Solyc03g093080_3	3	55695515	55696772	-	1077	protein_coding	NA && sp|Q38910|XTH23_ARATH Probable xyloglucan endotransglucosylase/hydrolase protein 23 OS=Arabidopsis thaliana OX=3702 GN=XTH23 PE=2 SV=1 && PF00722:Glycosyl hydrolases family 16|PF06955:Xyloglucan endo-transglycosylase (XET) C-terminus	NAC
Solyc03g122190_3	2628.311117	2098.563982	2097.589798	164.9484968	253.7889009	193.6907391	2274.821632	204.1427123	3.47913077	5.94E-137	2.38E-134	Solyc03g122190_3	3	71585569	71589220	-	2714	protein_coding	NA && sp|Q8H395|TI10B_ORYSJ Protein TIFY 10b OS=Oryza sativa subsp. japonica OX=39947 GN=TIFY10B PE=1 SV=1 && PF06200:tify domain|PF09425:Divergent CCT motif	-
Solyc10g050970_1	921.4853043	1145.983357	1146.105766	29.32417721	48.05470314	27.39704534	1071.191476	34.92530856	4.949256845	1.57E-134	6.17E-132	Solyc10g050970_1	10	51186360	51187031	+	672	protein_coding	NA && sp|Q9SZ06|EF109_ARATH Ethylene-responsive transcription factor ERF109 OS=Arabidopsis thaliana OX=3702 GN=ERF109 PE=1 SV=1 && PF00847:AP2 domain	ERF
Solyc03g098760_2	91.7185995	102.4745823	133.1622389	1451.546772	1437.88682	1390.240766	109.1184736	1426.558119	-3.695040688	1.43E-133	5.52E-131	Solyc03g098760_2	3	62472753	62473361	-	609	protein_coding	NA && sp|Q41448|API7_SOLTU Aspartic protease inhibitor 7 OS=Solanum tuberosum OX=4113 PE=2 SV=1 && PF00197:Trypsin and protease inhibitor	-
Solyc03g083615_1	2055.06987	2043.718431	2121.490712	284.4445189	356.6559998	269.5104692	2073.426338	303.536996	2.774449964	7.52E-132	2.84E-129	Solyc03g083615_1	3	55007997	55008536	+	540	protein_coding	NA && sp|P17407|21KD_DAUCA 21 kDa protein OS=Daucus carota OX=4039 PE=2 SV=1 && PF04043:Plant invertase/pectin methylesterase inhibitor	Nin-like
Solyc04g009435_1	1251.099021	1415.881201	1061.883495	65.24629429	87.85000417	84.10255777	1242.954572	79.06628541	3.972308177	7.17E-130	2.66E-127	Solyc04g009435_1	4	2854903	2862162	+	4176	protein_coding	NA && sp|Q9C598|NAC81_ARATH Protein ATAF2 OS=Arabidopsis thaliana OX=3702 GN=NAC081 PE=1 SV=1 && PF02365:No apical meristem (NAM) protein	AP2
Solyc09g075710_2	2711.431098	2753.823987	2818.031654	653.9291518	551.8782313	620.5749339	2761.09558	608.7941057	2.180960636	7.51E-130	2.74E-127	Solyc09g075710_2	9	67741505	67759491	-	4722	protein_coding	NA && sp|Q5NUF4|HIDM_GLYEC 2-hydroxyisoflavanone dehydratase OS=Glycyrrhiza echinata OX=46348 GN=HIDM PE=1 SV=1 && PF07859:alpha/beta hydrolase fold	NAC
Solyc09g082280_3	6039.096536	6392.393312	6373.577247	18842.98317	18657.98935	18306.96055	6268.355698	18602.64436	-1.569217458	2.81E-129	1.01E-126	Solyc09g082280_3	9	68485453	68487961	-	1248	protein_coding	NA && sp|Q9LJ86|LTPG5_ARATH Non-specific lipid transfer protein GPI-anchored 5 OS=Arabidopsis thaliana OX=3702 GN=LTPG5 PE=2 SV=1 && PF14368:Probable lipid transfer	-
Solyc03g083440_3	1610.807904	1857.532218	1552.421315	6836.198812	8242.883297	7267.862701	1673.587146	7448.981603	-2.155104207	8.02E-127	2.82E-124	Solyc03g083440_3	3	54763702	54775081	+	7393	protein_coding	NA && sp|Q9LV03|GLUT1_ARATH Glutamate synthase 1 [NADH], chloroplastic OS=Arabidopsis thaliana OX=3702 GN=GLT1 PE=1 SV=2 && PF01645:Conserved region in glutamate synthase|PF01493:GXGXG motif|PF07992:Pyridine nucleotide-disulphide oxidoreductase|PF00310:Glutamine amidotransferases class-II|PF14691:Dihydroprymidine dehydrogenase domain II, 4Fe-4S cluster|PF04898:Glutamate synthase central domain	C3H
Solyc06g083310_3	2784.519357	3489.909015	3788.864046	563.7573068	525.5983156	465.1126301	3354.430806	518.1560842	2.696187236	2.74E-124	9.48E-122	Solyc06g083310_3	6	48814053	48818335	-	2713	protein_coding	NA && sp|Q9LSG3|GAUT8_ARATH Galacturonosyltransferase 8 OS=Arabidopsis thaliana OX=3702 GN=GAUT8 PE=1 SV=1 && PF01501:Glycosyl transferase family 8	MIKC_MADS
Solyc10g008350_3	2016.376086	2365.575217	2288.797115	438.3964493	403.9598482	379.7357912	2223.582806	407.3640296	2.449661446	3.78E-124	1.28E-121	Solyc10g008350_3	10	2473251	2474103	+	572	protein_coding	NA && - && -	-
Solyc02g088630_3	1676.730647	1998.976007	2097.589798	201.6037183	158.4303494	238.2905804	1924.432151	199.4415494	3.267399829	7.51E-122	2.51E-119	Solyc02g088630_3	2	51293473	51298711	-	2744	protein_coding	NA && sp|Q0WV13|GAUTD_ARATH Probable galacturonosyltransferase 13 OS=Arabidopsis thaliana OX=3702 GN=GAUT13 PE=2 SV=1 && PF01501:Glycosyl transferase family 8	C2H2
Solyc03g093120_3	6708.355691	5712.597139	6270.006617	1829.828658	1707.443671	1701.802514	6230.319816	1746.358281	1.835131416	2.39E-121	7.86E-119	Solyc03g093120_3	3	55712198	55720653	-	3960	protein_coding	NA && sp|Q38910|XTH23_ARATH Probable xyloglucan endotransglucosylase/hydrolase protein 23 OS=Arabidopsis thaliana OX=3702 GN=XTH23 PE=2 SV=1 && PF00722:Glycosyl hydrolases family 16|PF06955:Xyloglucan endo-transglycosylase (XET) C-terminus	NAC
Solyc04g054910_3	693.6219087	682.6827808	681.7451377	2698.557408	2728.606112	2914.281055	686.0166091	2780.481525	-2.019414675	1.10E-120	3.56E-118	Solyc04g054910_3	4	53346864	53348369	+	1192	protein_coding	NA && sp|O65665|ERF60_ARATH Ethylene-responsive transcription factor ERF060 OS=Arabidopsis thaliana OX=3702 GN=ERF060 PE=1 SV=1 && PF00847:AP2 domain	ERF
Solyc03g082660_3	2856.174513	2999.185663	3034.278025	444.9943891	361.1611283	540.2952196	2963.212734	448.8169123	2.72070495	6.13E-120	1.95E-117	Solyc03g082660_3	3	53996997	54002314	+	3292	protein_coding	NA && sp|Q1KKV8|MFSD5_TAKRU Molybdate-anion transporter OS=Takifugu rubripes OX=31033 GN=mfsd5 PE=3 SV=1 && PF05631:Sugar-tranasporters, 12 TM	-
Solyc10g079090_2	1726.889256	1454.850408	1767.529547	225.0630601	164.4371873	180.9479273	1649.756404	190.1493916	3.118014386	1.18E-117	3.69E-115	Solyc10g079090_2	10	60840293	60845333	+	1567	protein_coding	NA && sp|Q9FL54|DNAJ6_ARATH Chaperone protein dnaJ 6 OS=Arabidopsis thaliana OX=3702 GN=ATJ6 PE=2 SV=1 && PF00226:DnaJ domain	TCP
Solyc11g068770_1	1496.159654	1086.807894	1431.778603	126.093962	102.8670989	101.3053537	1338.248717	110.0888049	3.60555848	7.07E-116	2.18E-113	Solyc11g068770_1	11	53701528	53702385	+	858	protein_coding	NA && sp|Q9FMS6|CAF1K_ARATH Probable CCR4-associated factor 1 homolog 11 OS=Arabidopsis thaliana OX=3702 GN=CAF1-11 PE=2 SV=1 && PF04857:CAF1 family ribonuclease	-
Solyc03g008010_3	1769.88235	1522.685695	1231.466175	116.5636044	151.6726568	121.6938525	1508.011407	129.9767046	3.536887748	6.15E-115	1.87E-112	Solyc03g008010_3	3	2470897	2478371	-	2465	protein_coding	NA && - && -	MYB_related
Solyc11g005670_2	1553.483779	1509.695959	1604.7757	4788.638138	4746.152789	4681.071909	1555.985146	4738.620945	-1.605843272	2.05E-114	6.13E-112	Solyc11g005670_2	11	494930	498128	+	2214	protein_coding	NA && sp|P0CG71|UBIQ1_CAEEL Polyubiquitin-A OS=Caenorhabditis elegans OX=6239 GN=ubq-1 PE=3 SV=1 && PF00240:Ubiquitin family	MYB_related
Solyc11g010250_1	1182.310072	1415.881201	1272.439172	151.0195126	124.6418863	156.7365849	1290.210148	144.1326613	3.159716512	2.67E-113	7.86E-111	Solyc11g010250_1	11	3317228	3317653	-	426	protein_coding	NA && - && -	-
Solyc02g064980_1	814.0025705	788.0439711	773.93438	21.26002848	31.53589893	14.01709296	791.9936406	22.27100679	5.170279572	5.30E-113	1.54E-110	Solyc02g064980_1	2	36673056	36674135	-	1080	protein_coding	NA && sp|Q9SND6|M3K20_ARATH Mitogen-activated protein kinase kinase kinase 20 OS=Arabidopsis thaliana OX=3702 GN=MAPKKK20 PE=1 SV=1 && PF00069:Protein kinase domain	NF-YC
Solyc09g008830_3	61.62343404	20.20625567	47.80182935	1149.507747	1114.268429	1141.118795	43.21050635	1134.96499	-4.706253417	6.09E-111	1.74E-108	Solyc09g008830_3	9	2256529	2257548	+	822	protein_coding	NA && - && -	Trihelix
Solyc02g089615_1	912.8866856	1145.983357	1033.430025	89.43874049	91.60427785	76.4568707	1030.766689	85.83329635	3.589054028	8.55E-111	2.41E-108	Solyc02g089615_1	2	52007125	52007703	-	372	protein_coding	NA && - && PF08132:S-adenosyl-l-methionine decarboxylase leader peptide	-
Solyc12g094620_2	6527.784699	6444.352255	6194.889457	16893.65849	16900.23841	17234.0158	6389.008803	17009.30423	-1.412901719	4.60E-109	1.28E-106	Solyc12g094620_2	12	65780218	65785116	+	2629	protein_coding	NA && sp|P30264|CATA1_SOLLC Catalase isozyme 1 OS=Solanum lycopersicum OX=4081 GN=CAT1 PE=2 SV=1 && PF00199:Catalase|PF06628:Catalase-related immune-responsive	Nin-like
Solyc03g118970_3	1699.660297	2016.295655	2041.820997	269.0493259	205.7341978	293.084671	1919.258983	255.9560649	2.904542774	1.10E-108	3.01E-106	Solyc03g118970_3	3	69197030	69200063	-	1822	protein_coding	NA && sp|Q9FHB6|DTX16_ARATH Protein DETOXIFICATION 16 OS=Arabidopsis thaliana OX=3702 GN=DTX16 PE=2 SV=1 && PF01554:MatE	HD-ZIP
Solyc06g060110_3	6785.74326	6393.836616	6885.739705	1765.315468	1502.460328	1933.721688	6688.43986	1733.832495	1.94717417	1.92E-107	5.19E-105	Solyc06g060110_3	6	38147692	38150530	-	2246	protein_coding	NA && sp|Q39134|AAP3_ARATH Amino acid permease 3 OS=Arabidopsis thaliana OX=3702 GN=AAP3 PE=1 SV=2 && PF01490:Transmembrane amino acid transporter protein	MYB_related
Solyc07g008560_3	4273.513495	4111.973029	3902.677925	1198.625743	1031.674408	1199.098589	4096.054816	1143.132913	1.840387476	9.85E-107	2.63E-104	Solyc07g008560_3	7	3500634	3508016	+	2419	protein_coding	NA && sp|Q5MAU8|PPA27_ARATH Probable inactive purple acid phosphatase 27 OS=Arabidopsis thaliana OX=3702 GN=PAP27 PE=2 SV=1 && PF14008:Iron/zinc purple acid phosphatase-like protein C|PF16656:Purple acid Phosphatase, N-terminal domain|PF00149:Calcineurin-like phosphoesterase|PF17808:Fn3-like domain from Purple Acid Phosphatase	GRAS
Solyc01g007010_3	2267.169131	2380.008257	2136.286517	263.1844904	400.9564293	296.9075146	2261.154635	320.3494781	2.820369479	4.76E-106	1.26E-103	Solyc01g007010_3	1	1567452	1572335	+	2391	protein_coding	NA && sp|Q9SVC6|PUB22_ARATH E3 ubiquitin-protein ligase PUB22 OS=Arabidopsis thaliana OX=3702 GN=PUB22 PE=1 SV=1 && PF04564:U-box domain	Dof
Solyc01g095150_3	6097.853764	5994.041414	6060.589079	1474.273009	1851.60778	1500.466088	6050.828085	1608.782292	1.911655477	3.13E-105	8.14E-103	Solyc01g095150_3	1	86400397	86401924	+	814	protein_coding	NA && sp|P46519|LEA14_SOYBN Desiccation protectant protein Lea14 homolog OS=Glycine max OX=3847 PE=2 SV=1 && PF03168:Late embryogenesis abundant protein	NAC
Solyc01g087590_3	832.6329111	789.4872751	864.9854835	49.85110125	33.03760841	54.79409067	829.0352232	45.89426678	4.168040894	6.68E-104	1.72E-101	Solyc01g087590_3	1	82419257	82425146	+	2135	protein_coding	NA && sp|Q9FNA2|PAO1_ARATH Polyamine oxidase 1 OS=Arabidopsis thaliana OX=3702 GN=PAO1 PE=1 SV=1 && PF01593:Flavin containing amine oxidoreductase	bHLH
Solyc07g045440_1	1192.341793	1095.467718	1028.87747	142.2222595	135.1538526	122.9681337	1105.562327	133.4480819	3.051444237	1.18E-103	3.00E-101	Solyc07g045440_1	7	58665087	58666316	-	1230	protein_coding	NA && sp|Q9SU13|FLA2_ARATH Fasciclin-like arabinogalactan protein 2 OS=Arabidopsis thaliana OX=3702 GN=FLA2 PE=2 SV=1 && PF02469:Fasciclin domain	NF-YB
Solyc02g089250_3	140.4441055	151.5469175	147.9580432	1246.277531	1163.073987	1374.312251	146.6496887	1261.221256	-3.104320998	4.35E-103	1.09E-100	Solyc02g089250_3	2	51753568	51756198	+	2068	protein_coding	NA && - && PF01190:Pollen proteins Ole e I like	Nin-like
Solyc11g007730_2	1008.904594	923.7145449	858.1566508	82.10769618	92.35513259	90.47396366	930.2585967	88.31226415	3.395723647	1.85E-102	4.58E-100	Solyc11g007730_2	11	1965451	1969004	-	1728	protein_coding	NA && sp|Q07469|BSPA_POPDE Bark storage protein A OS=Populus deltoides OX=3696 GN=BSPA PE=2 SV=1 && PF01048:Phosphorylase superfamily	-
Solyc02g078380_3	245.060633	178.9696931	177.5496519	1642.153924	1503.211182	1485.811854	200.5266593	1543.725653	-2.949338209	2.35E-102	5.75E-100	Solyc02g078380_3	2	43652165	43653626	-	1016	protein_coding	NA && sp|P24805|TSJT1_TOBAC Stem-specific protein TSJT1 OS=Nicotiana tabacum OX=4097 GN=TSJT1 PE=2 SV=1 && PF12481:Aluminium induced protein	-
Solyc10g081170_2	4239.119021	3817.539018	3454.25124	980.8937276	1063.961162	969.7279767	3836.969759	1004.860955	1.932670674	1.11E-101	2.67E-99	Solyc10g081170_2	10	62425637	62430627	-	2089	protein_coding	NA && sp|P62200|CALM1_DAUCA Calmodulin-1/11/16 OS=Daucus carota OX=4039 GN=CAM-1 PE=2 SV=2 && PF13499:EF-hand domain pair	HSF
Solyc01g079940_3	131.8454868	183.299605	219.6607873	1854.021104	1572.289818	1595.400035	178.2686264	1673.903653	-3.221557966	1.15E-101	2.73E-99	Solyc01g079940_3	1	78950261	78952701	-	1826	protein_coding	NA && sp|P0DO21|GIP2_NICBE Probable aspartic proteinase GIP2 OS=Nicotiana benthamiana OX=4100 GN=GIP2 PE=1 SV=1 && PF14541:Xylanase inhibitor C-terminal|PF14543:Xylanase inhibitor N-terminal	FAR1
Solyc12g098850_2	67.35584651	111.1344062	120.6427122	1284.398962	1155.565439	1304.863927	99.71098829	1248.276109	-3.635250636	7.56E-100	1.78E-97	Solyc12g098850_2	12	67213632	67215554	+	1431	protein_coding	NA && sp|Q9C5W0|DGAT3_ARATH Diacylglycerol O-acyltransferase 3 OS=Arabidopsis thaliana OX=3702 GN=DGAT3 PE=1 SV=2 && -	-
Solyc07g008130_3	912.8866856	847.2194342	918.4780069	3020.390253	2929.084327	2951.235209	892.8613756	2966.903263	-1.731535604	1.58E-99	3.69E-97	Solyc07g008130_3	7	2838582	2841238	-	1379	protein_coding	NA && - && PF02298:Plastocyanin-like domain	-
Solyc04g005050_2	5203.597418	5211.770659	5257.06309	1678.076041	1817.068462	1900.590378	5224.143722	1798.578294	1.538018835	2.05E-99	4.73E-97	Solyc04g005050_2	4	44948	48620	+	2115	protein_coding	NA && sp|Q5XF51|3MMP_ARATH Metalloendoproteinase 3-MMP OS=Arabidopsis thaliana OX=3702 GN=3MMP PE=1 SV=1 && PF00413:Matrixin|PF01471:Putative peptidoglycan binding domain	SBP
Solyc04g080540_2	875.6260046	799.5904029	990.1807509	3786.484382	3369.085203	3404.242168	888.4657195	3519.937251	-1.983402274	2.74E-98	6.23E-96	Solyc04g080540_2	4	64762143	64763686	+	821	protein_coding	NA && - && -	-
Solyc04g077980_1	5388.467721	5116.512596	5138.696656	1801.970689	1904.918467	1687.785421	5214.558991	1798.224859	1.536342521	7.86E-97	1.77E-94	Solyc04g077980_1	4	62935909	62936691	+	783	protein_coding	NA && sp|O22533|ZAT6_ARATH Zinc finger protein ZAT6 OS=Arabidopsis thaliana OX=3702 GN=ZAT6 PE=2 SV=1 && PF13912:C2H2-type zinc finger	C2H2
Solyc01g112000_3	8856.577264	8400.029143	8878.620733	3522.566787	3321.781354	3298.47683	8711.74238	3380.941657	1.365735143	3.03E-95	6.75E-93	Solyc01g112000_3	1	98049264	98050897	+	1041	protein_coding	NA && sp|Q9LZT4|EXLA1_ARATH Expansin-like A1 OS=Arabidopsis thaliana OX=3702 GN=EXLA1 PE=2 SV=1 && PF01357:Pollen allergen|PF03330:Lytic transglycolase	bHLH
Solyc04g007750_3	978.809429	923.7145449	1116.514157	119.4960221	92.35513259	98.75679132	1006.346044	103.535982	3.282547848	4.65E-95	1.02E-92	Solyc04g007750_3	4	1429230	1430194	+	847	protein_coding	NA && sp|P85524|KIRO_ACTDE Kirola OS=Actinidia deliciosa OX=3627 PE=1 SV=1 && PF00407:Pathogenesis-related protein Bet v I family	-
Solyc03g116890_3	3420.817141	2931.350376	3000.133861	616.5408258	483.5504503	693.8461016	3117.433793	597.9791259	2.380502898	3.04E-94	6.62E-92	Solyc03g116890_3	3	67623408	67626540	-	2137	protein_coding	NA && sp|Q9SAH7|WRK40_ARATH Probable WRKY transcription factor 40 OS=Arabidopsis thaliana OX=3702 GN=WRKY40 PE=1 SV=1 && PF03106:WRKY DNA -binding domain	WRKY
Solyc10g081570_2	60648.92392	58111.748	39632.26909	8119.864669	8212.849108	6733.938887	52797.647	7688.884221	2.779637805	3.29E-94	7.10E-92	Solyc10g081570_2	10	62734110	62737651	-	1377	protein_coding	NA && - && -	-
Solyc04g080850_3	2953.625524	3003.515575	2599.509006	816.6783353	761.3667028	823.8227818	2852.216702	800.6226066	1.831700476	1.24E-93	2.63E-91	Solyc04g080850_3	4	65002212	65008992	-	5197	protein_coding	NA && sp|Q10RB4|BGAL5_ORYSJ Beta-galactosidase 5 OS=Oryza sativa subsp. japonica OX=39947 GN=Os03g0165400 PE=2 SV=1 && -	MYB_related
Solyc10g009150_3	1255.398331	1079.591374	1174.559236	170.0802278	183.9594104	152.2766008	1169.849647	168.7720797	2.795360614	3.72E-93	7.86E-91	Solyc10g009150_3	10	3140011	3141394	+	796	protein_coding	NA && - && PF10950:Organ specific protein	-
Solyc03g083690_1	779.6080957	572.9916786	818.321793	24.92555063	21.02393262	11.46853061	723.6405225	19.13933795	5.257799798	3.87E-93	8.07E-91	Solyc03g083690_1	3	55078030	55078299	+	270	protein_coding	NA && - && -	-
Solyc03g111300_1	541.7129783	604.7443661	621.4237816	8.797253163	10.51196631	8.919968249	589.2937087	9.409729241	5.972955523	4.76E-93	9.83E-91	Solyc03g111300_1	3	63400740	63402215	+	1476	protein_coding	NA && sp|Q9FMV7|C94B1_ARATH Cytochrome P450 94B1 OS=Arabidopsis thaliana OX=3702 GN=CYP94B1 PE=1 SV=1 && PF00067:Cytochrome P450	C2H2
Solyc01g102890_3	834.0660142	802.4770109	860.4329284	2730.814003	3106.286045	3157.031619	832.3253178	2998.043889	-1.848019405	1.26E-92	2.59E-90	Solyc01g102890_3	1	91443047	91444225	-	735	protein_coding	NA && sp|P92997|GL113_ARATH Germin-like protein subfamily 1 member 13 OS=Arabidopsis thaliana OX=3702 GN=GLP6 PE=2 SV=2 && PF00190:Cupin	E2F/DP
Solyc08g036620_3	1004.605285	812.5801387	1027.739331	2.932417721	4.505128419	3.822843535	948.3082517	3.753463225	7.982545338	2.93E-91	5.92E-89	Solyc08g036620_3	8	10664074	10664829	+	569	protein_coding	NA && sp|Q8LBM2|TIF5A_ARATH Protein TIFY 5A OS=Arabidopsis thaliana OX=3702 GN=TIFY5A PE=1 SV=1 && PF09425:Divergent CCT motif|PF06200:tify domain	-
Solyc08g074705_1	960.1790885	1076.704766	1237.156869	28.59107278	62.32094313	69.44832422	1091.346908	53.45344671	4.346288207	4.36E-91	8.74E-89	Solyc08g074705_1	8	58977897	58980691	-	385	protein_coding	NA && - && -	-
Solyc12g099000_2	2495.032527	2247.224291	2170.43068	459.6564777	491.8098524	582.9836391	2304.229166	511.4833231	2.169545253	9.67E-91	1.92E-88	Solyc12g099000_2	12	67298171	67300163	-	1245	protein_coding	NA && sp|P43281|METK2_SOLLC S-adenosylmethionine synthase 2 OS=Solanum lycopersicum OX=4081 GN=SAM2 PE=2 SV=1 && PF00438:S-adenosylmethionine synthetase, N-terminal domain|PF02773:S-adenosylmethionine synthetase, C-terminal domain|PF02772:S-adenosylmethionine synthetase, central domain	-
Solyc11g072550_2	1460.332076	1322.066442	1586.565479	203.0699272	181.7068462	251.6705327	1456.321333	212.149102	2.776778042	3.38E-90	6.65E-88	Solyc11g072550_2	11	56029266	56032252	+	1059	protein_coding	NA && sp|Q949R4|DIOXL_ARATH Extradiol ring-cleavage dioxygenase OS=Arabidopsis thaliana OX=3702 GN=LIGB PE=2 SV=1 && PF02900:Catalytic LigB subunit of aromatic ring-opening dioxygenase	ZF-HD
Solyc07g007240_3	524.5157409	430.104585	663.534917	3455.854284	2816.456117	3090.768998	539.3850809	3121.026466	-2.52762167	8.41E-90	1.64E-87	Solyc07g007240_3	7	1983929	1984935	+	513	protein_coding	NA && sp|P01075|MCPI_SOLTU Metallocarboxypeptidase inhibitor OS=Solanum tuberosum OX=4113 PE=1 SV=1 && -	-
Solyc01g100370_3	339.6454388	271.3411476	225.3514812	1724.994724	1681.91461	1818.399242	278.7793559	1741.769525	-2.65026724	1.65E-89	3.18E-87	Solyc01g100370_3	1	90302669	90309164	+	5791	protein_coding	NA && sp|Q40401|CALR_NICPL Calreticulin OS=Nicotiana plumbaginifolia OX=4092 GN=CAL1 PE=2 SV=1 && PF00262:Calreticulin family	ERF
Solyc04g074490_3	1016.07011	907.8382012	853.6040956	118.0298133	101.3653894	103.2167754	925.8374689	107.537326	3.105779944	4.61E-88	8.80E-86	Solyc04g074490_3	4	60567529	60578930	+	3483	protein_coding	NA && sp|Q9M9E8|FB92_ARATH F-box protein At1g78280 OS=Arabidopsis thaliana OX=3702 GN=At1g78280 PE=2 SV=3 && PF13621:Cupin-like domain|PF12937:F-box-like	GATA
Solyc08g075870_3	974.5101197	1112.787366	1168.868542	76.97596517	79.59060207	36.95415417	1085.388676	64.50690714	4.082766443	7.78E-88	1.47E-85	Solyc08g075870_3	8	60081062	60085317	+	2377	protein_coding	NA && sp|Q94II3|PMTL_ARATH Probable methyltransferase PMT21 OS=Arabidopsis thaliana OX=3702 GN=ERD3 PE=2 SV=1 && PF03141:Putative S-adenosyl-L-methionine-dependent methyltransferase	NAC
Solyc08g076730_3	117.5144556	72.16519882	139.9910717	1241.1458	1148.807747	1266.635491	109.890242	1218.863013	-3.458047785	6.76E-87	1.27E-84	Solyc08g076730_3	8	60802405	60803887	-	1320	protein_coding	NA && - && -	-
Solyc07g006220_2	2174.017429	1863.305434	1797.121156	447.1937024	477.5436124	433.8927412	1944.814673	452.8766854	2.10235436	2.18E-86	4.05E-84	Solyc07g006220_2	7	1040137	1041437	-	1301	protein_coding	NA && sp|Q9M0B6|GAE1_ARATH UDP-glucuronate 4-epimerase 1 OS=Arabidopsis thaliana OX=3702 GN=GAE1 PE=1 SV=1 && PF16363:GDP-mannose 4,6 dehydratase	ERF
Solyc01g098690_2	1428.803808	1242.684724	1443.159991	269.7824303	274.8128336	276.5190157	1371.549507	273.7047599	2.325585487	5.22E-86	9.59E-84	Solyc01g098690_2	1	88989482	88992582	+	3101	protein_coding	NA && sp|F4KHA2|RLP54_ARATH Receptor-like protein 54 OS=Arabidopsis thaliana OX=3702 GN=RLP54 PE=3 SV=1 && PF08263:Leucine rich repeat N-terminal domain|PF13855:Leucine rich repeat	C2H2
Solyc08g077900_3	1238.201093	1068.044943	953.7603095	73.31044302	65.32436208	114.6853061	1086.668782	84.44003705	3.677641236	4.20E-84	7.65E-82	Solyc08g077900_3	8	61925910	61929099	+	1079	protein_coding	NA && sp|O23547|EXLB1_ARATH Expansin-like B1 OS=Arabidopsis thaliana OX=3702 GN=EXLB1 PE=2 SV=2 && PF03330:Lytic transglycolase|PF01357:Pollen allergen	bHLH
Solyc03g093560_1	121.813765	116.9076221	144.5436269	1180.298133	959.5923533	1119.456015	127.7550046	1086.448834	-3.081797604	2.63E-82	4.74E-80	Solyc03g093560_1	3	56373569	56374303	-	735	protein_coding	NA && sp|Q40478|ERF5_TOBAC Ethylene-responsive transcription factor 5 OS=Nicotiana tabacum OX=4097 GN=ERF5 PE=2 SV=1 && PF00847:AP2 domain	ERF
Solyc12g057060_2	1523.388614	1844.542482	1566.078981	340.8935601	288.3282188	351.7016052	1644.670025	326.9744614	2.328872108	4.89E-82	8.75E-80	Solyc12g057060_2	12	64076194	64078103	-	1738	protein_coding	NA && sp|F8WKW1|UGT2_GARJA 7-deoxyloganetin glucosyltransferase OS=Gardenia jasminoides OX=114476 GN=UGT85A24 PE=1 SV=1 && PF00201:UDP-glucoronosyl and UDP-glucosyl transferase	GRAS
Solyc07g007140_3	1887.396805	1841.655874	2020.19636	450.8592246	480.5470314	372.0901041	1916.416346	434.4987867	2.143315539	7.51E-82	1.33E-79	Solyc07g007140_3	7	1876172	1900089	-	6996	protein_coding	NA && sp|A7J1T2|M313A_XENLA Mitogen-activated protein kinase kinase kinase 13-A OS=Xenopus laevis OX=8355 GN=map3k13-a PE=2 SV=1 && PF03790:KNOX1 domain	NF-YC
Solyc01g079200_3	944.4149542	1056.498511	1271.301033	142.9553639	153.1743662	139.533789	1090.738166	145.2211731	2.911303232	9.77E-82	1.72E-79	Solyc01g079200_3	1	78143255	78146506	-	1296	protein_coding	NA && sp|Q9XHM5|G2OX2_PEA Gibberellin 2-beta-dioxygenase 2 OS=Pisum sativum OX=3888 GN=GA2OX2 PE=2 SV=1 && PF14226:non-haem dioxygenase in morphine synthesis N-terminal|PF03171:2OG-Fe(II) oxygenase superfamily	Dof
Solyc04g071070_2	2773.054532	2774.030243	3021.758498	859.1983922	873.9949133	975.462242	2856.281091	902.8851825	1.661288676	3.99E-81	6.95E-79	Solyc04g071070_2	4	58068230	58069737	+	1224	protein_coding	NA && - && -	-
Solyc07g063940_2	2510.796661	2654.236013	2656.415946	763.8948163	754.6090102	876.0683101	2607.14954	798.1907122	1.706803094	1.89E-80	3.27E-78	Solyc07g063940_2	7	66395286	66398607	-	2278	protein_coding	NA && sp|Q69VG1|CIGR1_ORYSJ Chitin-inducible gibberellin-responsive protein 1 OS=Oryza sativa subsp. japonica OX=39947 GN=CIGR1 PE=2 SV=1 && PF03514:GRAS domain family	GRAS
Solyc11g056250_1	2861.906925	3702.074699	2780.473074	453.0585379	654.7453302	603.372138	3114.818233	570.392002	2.448480899	4.09E-79	7.01E-77	Solyc11g056250_1	11	45588075	45588245	-	171	protein_coding	NA && - && -	-
Solyc03g096540_3	2324.493256	2430.523896	2361.637998	480.1834018	515.837204	658.1662286	2372.218383	551.3956115	2.103200495	1.16E-78	1.97E-76	Solyc03g096540_3	3	60134470	60136060	-	815	protein_coding	NA && sp|Q9SIE7|PLAT2_ARATH PLAT domain-containing protein 2 OS=Arabidopsis thaliana OX=3702 GN=PLAT2 PE=2 SV=1 && PF01477:PLAT/LH2 domain	-
Solyc04g051820_3	1775.614762	1479.386576	1670.78775	303.5052341	190.7171031	250.3962516	1641.929696	248.2061962	2.72532541	1.92E-78	3.24E-76	Solyc04g051820_3	4	51068358	51071815	+	602	protein_coding	NA && - && -	-
Solyc12g009000_1	1971.949889	1895.058121	1701.517497	524.1696676	488.0555787	481.0411448	1856.175169	497.7554637	1.898273754	1.05E-77	1.76E-75	Solyc12g009000_1	12	2301110	2302564	+	1455	protein_coding	NA && - && PF13359:DDE superfamily endonuclease	SBP
Solyc07g005210_3	64.48964027	60.61876701	95.60365871	923.7115821	814.6773891	970.3651173	73.57068866	902.9180295	-3.600721581	1.36E-77	2.25E-75	Solyc07g005210_3	7	202262	203432	-	912	protein_coding	NA && sp|Q9FGT8|TIL_ARATH Temperature-induced lipocalin-1 OS=Arabidopsis thaliana OX=3702 GN=TIL PE=1 SV=1 && PF08212:Lipocalin-like domain	FAR1
Solyc12g088670_2	881.3584171	786.6006671	697.6790808	2731.547107	2687.309102	2653.690554	788.546055	2690.848921	-1.773672974	1.78E-77	2.92E-75	Solyc12g088670_2	12	64929580	64934433	-	2483	protein_coding	NA && sp|P20721|CYSPL_SOLLC Low-temperature-induced cysteine proteinase (Fragment) OS=Solanum lycopersicum OX=4081 PE=2 SV=1 && PF00396:Granulin|PF00112:Papain family cysteine protease|PF08246:Cathepsin propeptide inhibitor domain (I29)	BBR-BPC
Solyc09g075210_3	20205.32085	20770.58752	19479.24546	6874.320242	6698.375104	7975.088755	20151.71795	7182.5947	1.488103691	8.80E-77	1.43E-74	Solyc09g075210_3	9	67409276	67420507	+	1432	protein_coding	NA && sp|Q93WF6|SAG21_ARATH Protein SENESCENCE-ASSOCIATED GENE 21, mitochondrial OS=Arabidopsis thaliana OX=3702 GN=SAG21 PE=2 SV=1 && -	-
Solyc04g081730_3	1546.318263	1297.530275	1465.922767	299.1066075	333.379503	287.3504057	1436.590435	306.6121721	2.229480965	1.04E-76	1.68E-74	Solyc04g081730_3	4	65747838	65752734	-	3513	protein_coding	NA && - && -	-
Solyc02g063350_1	614.8012373	558.5586389	445.0122685	16.12829746	22.5256421	12.74281178	539.4573815	17.13225045	4.98745808	1.48E-76	2.37E-74	Solyc02g063350_1	2	35960084	35960521	+	438	protein_coding	NA && sp|Q0DJV6|CML18_ORYSJ Probable calcium-binding protein CML18 OS=Oryza sativa subsp. japonica OX=39947 GN=CML18 PE=2 SV=1 && PF13499:EF-hand domain pair	HSF
Solyc10g050980_1	12.89792805	12.98973579	4.552555177	801.2831422	849.216707	790.0543306	10.14673967	813.5180599	-6.38265034	1.70E-76	2.70E-74	Solyc10g050980_1	10	51191783	51191983	+	201	protein_coding	NA && - && -	-
Solyc05g012580_1	997.4397695	1164.746309	1213.255955	198.6713006	184.7102652	158.0108661	1125.147344	180.464144	2.643114647	1.25E-75	1.97E-73	Solyc05g012580_1	5	5800175	5800387	+	213	protein_coding	NA && sp|Q9ZQ80|NDRP1_ARATH Nodulin-related protein 1 OS=Arabidopsis thaliana OX=3702 GN=NRP1 PE=1 SV=1 && -	-
Solyc09g064480_2	1729.755462	1729.078164	1931.421534	403.2074366	498.567545	425.6099136	1796.75172	442.4616317	2.023180185	1.40E-74	2.20E-72	Solyc09g064480_2	9	61986781	61988586	+	1806	protein_coding	NA && sp|Q7XJ98|MUR3_ARATH Xyloglucan galactosyltransferase MUR3 OS=Arabidopsis thaliana OX=3702 GN=MUR3 PE=1 SV=1 && PF03016:Exostosin family	NAC
Solyc05g041910_3	4127.336977	4120.632853	4314.684169	1397.297044	1166.828261	1026.433489	4187.551333	1196.852931	1.80775349	2.27E-74	3.53E-72	Solyc05g041910_3	5	55034291	55037155	+	1668	protein_coding	NA && sp|Q9FKH6|B561P_ARATH Cytochrome b561 and DOMON domain-containing protein At5g35735 OS=Arabidopsis thaliana OX=3702 GN=At5g35735 PE=2 SV=1 && PF03188:Eukaryotic cytochrome b561|PF04526:Protein of unknown function (DUF568)	bZIP
Solyc04g079120_3	1423.071395	1697.325476	1729.970967	360.6873797	295.0859114	265.6876257	1616.78928	307.1536389	2.398085505	3.00E-74	4.62E-72	Solyc04g079120_3	4	63790772	63796642	-	2290	protein_coding	NA && sp|Q9FX08|P2C12_ARATH Probable protein phosphatase 2C 12 OS=Arabidopsis thaliana OX=3702 GN=At1g47380 PE=2 SV=1 && PF00481:Protein phosphatase 2C	B3
Solyc11g010500_1	6984.944593	6588.682652	6422.517215	2530.676493	2808.947569	2765.827298	6665.381487	2701.81712	1.302474351	3.32E-73	5.08E-71	Solyc11g010500_1	11	3563122	3564096	-	975	protein_coding	NA && sp|Q9SJY5|PUMP5_ARATH Mitochondrial uncoupling protein 5 OS=Arabidopsis thaliana OX=3702 GN=PUMP5 PE=2 SV=1 && PF00153:Mitochondrial carrier protein	ERF
Solyc10g086100_2	683.5901869	646.6001814	604.3516997	2592.257265	2567.923199	2114.032475	644.847356	2424.737646	-1.912003738	5.57E-73	8.46E-71	Solyc10g086100_2	10	65172272	65173495	-	493	protein_coding	NA && sp|Q02214|ITR1_NICSY Trypsin inhibitor 1 OS=Nicotiana sylvestris OX=4096 PE=2 SV=1 && PF00280:Potato inhibitor I family	-
Solyc04g074410_2	5531.778032	5768.885994	5886.453843	2310.01206	2391.472336	2094.281117	5729.03929	2265.255171	1.33923011	7.46E-73	1.12E-70	Solyc04g074410_2	4	60507541	60516683	+	1073	protein_coding	NA && sp|O82161|PHI1_TOBAC Protein PHOSPHATE-INDUCED 1 OS=Nicotiana tabacum OX=4097 GN=PHI-1 PE=2 SV=1 && PF04674:Phosphate-induced protein 1 conserved region	MYB
Solyc08g036640_3	1524.821717	1457.737016	1638.919864	24.92555063	7.508547365	16.56565532	1540.492865	16.3332511	6.556883648	5.39E-71	8.06E-69	Solyc08g036640_3	8	10547251	10548057	+	589	protein_coding	NA && sp|Q8LBM2|TIF5A_ARATH Protein TIFY 5A OS=Arabidopsis thaliana OX=3702 GN=TIFY5A PE=1 SV=1 && PF06200:tify domain|PF09425:Divergent CCT motif	-
Solyc04g079730_1	634.8646809	809.6935308	1027.739331	37.38832594	67.57692629	46.51126301	824.0991809	50.49217175	4.033064892	7.39E-71	1.10E-68	AOS1	4	64179832	64181436	-	1605	protein_coding	NA && sp|K4BV52|AOS1_SOLLC Allene oxide synthase 1, chloroplastic OS=Solanum lycopersicum OX=4081 GN=AOS1 PE=2 SV=1 && PF00067:Cytochrome P450	C3H
Solyc03g114360_3	1652.367894	1527.015607	1800.535572	457.4571645	430.9906188	463.2012083	1659.973024	450.5496639	1.881934209	4.46E-70	6.58E-68	Solyc03g114360_3	3	65852413	65855041	-	2255	protein_coding	NA && sp|Q9FJJ3|SRO5_ARATH Probable inactive poly [ADP-ribose] polymerase SRO5 OS=Arabidopsis thaliana OX=3702 GN=SRO5 PE=1 SV=1 && PF12174:RCD1-SRO-TAF4 (RST) plant domain	NAC
Solyc07g032740_3	296.6523453	275.6710595	264.0482002	1197.892639	1271.947924	1286.38685	278.790535	1252.075804	-2.169264549	8.06E-69	1.18E-66	Solyc07g032740_3	7	40993804	40999459	-	2218	protein_coding	NA && sp|P28734|AATC_DAUCA Aspartate aminotransferase, cytoplasmic OS=Daucus carota OX=4039 PE=2 SV=1 && PF00155:Aminotransferase class I and II	-
Solyc06g076020_3	1314.155558	1518.355783	1534.211095	315.9680094	343.1406146	261.8647822	1455.574145	306.9911354	2.247823655	8.36E-69	1.21E-66	Solyc06g076020_3	6	47333986	47337132	-	2355	protein_coding	NA && sp|P24629|HSP71_SOLLC Heat shock cognate 70 kDa protein 1 OS=Solanum lycopersicum OX=4081 GN=HSC-I PE=2 SV=1 && PF00012:Hsp70 protein	GATA
Solyc03g026270_2	2113.827098	2342.482354	2398.058439	611.4090948	407.7141219	482.9525666	2284.789297	500.6919278	2.190359435	1.08E-68	1.56E-66	Solyc03g026270_2	3	3737395	3744238	+	1596	protein_coding	NA && sp|Q9M0L0|DRE1A_ARATH Dehydration-responsive element-binding protein 1A OS=Arabidopsis thaliana OX=3702 GN=DREB1A PE=1 SV=2 && PF00847:AP2 domain	AP2
Solyc06g035700_1	620.5336497	604.7443661	526.9582617	24.92555063	32.28675367	10.83139002	584.0787592	22.68123144	4.704966249	1.84E-68	2.64E-66	Solyc06g035700_1	6	24829670	24830206	-	537	protein_coding	NA && sp|Q9FJ90|ERF25_ARATH Ethylene-responsive transcription factor ERF025 OS=Arabidopsis thaliana OX=3702 GN=ERF025 PE=2 SV=1 && PF00847:AP2 domain	ERF
Solyc12g100060_1	1337.085208	1473.61336	1333.898667	3594.411021	3549.290339	3436.099198	1381.532412	3526.600186	-1.352726465	1.14E-67	1.61E-65	Solyc12g100060_1	12	67928336	67928818	-	483	protein_coding	NA && sp|Q9LHJ8|SAP5_ARATH Zinc finger A20 and AN1 domain-containing stress-associated protein 5 OS=Arabidopsis thaliana OX=3702 GN=SAP5 PE=2 SV=1 && PF01428:AN1-like Zinc finger	NF-YB
Solyc01g102900_3	263.6909736	291.5474032	331.1983891	1403.161879	1353.79109	1276.1926	295.478922	1344.381857	-2.181203316	4.66E-67	6.58E-65	Solyc01g102900_3	1	91446646	91447620	-	892	protein_coding	NA && sp|P92996|GL120_ARATH Germin-like protein subfamily 1 member 20 OS=Arabidopsis thaliana OX=3702 GN=GLP5A PE=1 SV=1 && PF00190:Cupin	E2F/DP
Solyc07g054780_1	140.4441055	105.3611903	87.63668715	1151.70706	994.8825259	872.2454666	111.1473276	1006.278351	-3.187393933	6.43E-67	9.02E-65	Solyc07g054780_1	7	63110918	63111169	-	252	protein_coding	NA && - && -	Nin-like
Solyc08g080670_2	4757.902349	4892.80048	5529.078262	1980.84817	2034.065481	1878.927598	5059.92703	1964.61375	1.36572231	8.54E-67	1.19E-64	Solyc08g080670_2	8	64008272	64012606	-	1856	protein_coding	NA && sp|P50703|OS35_SOLCO Osmotin-like protein OSML15 OS=Solanum commersonii OX=4109 PE=2 SV=1 && PF00314:Thaumatin family	MYB
Solyc02g063450_3	594.7377936	614.847494	507.6099022	1994.777155	1889.901372	2145.252364	572.3983966	2009.976963	-1.815588341	3.31E-66	4.58E-64	Solyc02g063450_3	2	36087659	36093959	-	3395	protein_coding	NA && sp|Q9ZQ47|GRDP1_ARATH Glycine-rich domain-containing protein 1 OS=Arabidopsis thaliana OX=3702 GN=GRDP1 PE=2 SV=1 && PF07173:Glycine-rich domain-containing protein-like	GRAS
Solyc01g102910_3	872.7597984	1218.148556	1052.778385	3462.452224	3482.464268	3592.198642	1047.89558	3512.371711	-1.745010005	3.39E-66	4.65E-64	Solyc01g102910_3	1	91450976	91453382	+	2301	protein_coding	NA && sp|Q9FID0|GL114_ARATH Germin-like protein subfamily 1 member 14 OS=Arabidopsis thaliana OX=3702 GN=At5g39110 PE=3 SV=1 && PF00190:Cupin	E2F/DP
Solyc02g091990_3	547.4453908	689.8993007	781.9013516	17.59450633	35.29017262	44.59984124	673.0820144	32.49484006	4.364279692	3.51E-66	4.79E-64	ACS3	2	53844982	53847973	-	2673	protein_coding	NA && sp|Q42881|1A13_SOLLC 1-aminocyclopropane-1-carboxylate synthase 3 OS=Solanum lycopersicum OX=4081 GN=ACS3 PE=1 SV=1 && PF00155:Aminotransferase class I and II	-
Solyc02g090490_3	1463.198283	1486.603096	1424.94977	285.9107278	313.8572799	203.247848	1458.250383	267.6719519	2.448587083	6.38E-66	8.64E-64	Solyc02g090490_3	2	52653969	52656132	-	1507	protein_coding	NA && sp|O23181|PLP3_ARATH Patatin-like protein 3 OS=Arabidopsis thaliana OX=3702 GN=PLP3 PE=2 SV=2 && PF01734:Patatin-like phospholipase	-
Solyc02g077430_3	1084.85906	1046.395383	946.9314767	207.4685538	201.2290694	221.724925	1026.061973	210.1408494	2.285777732	2.75E-65	3.69E-63	Solyc02g077430_3	2	42941909	42943255	-	1280	protein_coding	NA && sp|O49523|DSEL_ARATH Phospholipase A1-IIgamma OS=Arabidopsis thaliana OX=3702 GN=DSEL PE=1 SV=1 && PF01764:Lipase (class 3)	Trihelix
Solyc01g099620_3	222.1309832	200.6192527	175.2733743	1271.936186	1078.978256	1055.104816	199.3412034	1135.339753	-2.514337315	8.75E-65	1.17E-62	Solyc01g099620_3	1	89679425	89683661	-	2983	protein_coding	NA && sp|Q948T9|RBOHB_SOLTU Respiratory burst oxidase homolog protein B OS=Solanum tuberosum OX=4113 GN=RBOHB PE=1 SV=1 && PF01794:Ferric reductase like transmembrane component|PF08022:FAD-binding domain|PF08030:Ferric reductase NAD binding domain|PF08414:Respiratory burst NADPH oxidase	bHLH
Solyc08g065430_3	375.4730167	437.3211049	390.3816064	11.72967088	15.01709473	16.56565532	401.058576	14.43747364	4.789904898	1.29E-63	1.71E-61	Solyc08g065430_3	8	53501858	53507696	-	1298	protein_coding	NA && sp|Q9ASU8|NDL2_ARATH Protein NDL2 OS=Arabidopsis thaliana OX=3702 GN=NDL2 PE=1 SV=1 && PF03096:Ndr family	-
Solyc02g078890_1	566.0757313	479.1769202	464.360628	10.26346202	24.7782063	26.12276416	503.2044265	20.38814416	4.616714407	1.30E-63	1.71E-61	Solyc02g078890_1	2	44083892	44084086	+	195	protein_coding	NA && - && -	-
Solyc01g096450_3	1794.245103	1275.880715	1821.022071	268.3162215	192.9696673	293.7218116	1630.382629	251.6692335	2.69424889	2.16E-63	2.82E-61	Solyc01g096450_3	1	87419111	87422329	+	1832	protein_coding	NA && sp|O04496|AED3_ARATH Aspartyl protease AED3 OS=Arabidopsis thaliana OX=3702 GN=AED3 PE=1 SV=1 && PF14541:Xylanase inhibitor C-terminal|PF14543:Xylanase inhibitor N-terminal	Trihelix
Solyc12g098520_2	226.4302925	177.5263891	202.5887054	1071.798677	1009.899621	1065.936206	202.1817957	1049.211501	-2.37542501	7.66E-63	9.97E-61	Solyc12g098520_2	12	66980364	66984399	-	1742	protein_coding	NA && sp|Q94BZ5|HSFA5_ARATH Heat stress transcription factor A-5 OS=Arabidopsis thaliana OX=3702 GN=HSFA5 PE=2 SV=1 && PF00447:HSF-type DNA-binding	HSF
Solyc11g069760_1	22.92964987	14.43303976	10.24324915	572.55456	530.103444	541.5695008	15.86864626	548.0758349	-5.141136563	2.36E-62	3.05E-60	Solyc11g069760_1	11	54671084	54671635	-	552	protein_coding	NA && sp|Q9FJH8|NRT24_ARATH High affinity nitrate transporter 2.4 OS=Arabidopsis thaliana OX=3702 GN=NRT2.4 PE=2 SV=1 && -	-
Solyc03g120475_1	2032.14022	1681.449133	1735.661661	557.8924714	509.0795114	530.1009702	1816.417005	532.357651	1.770168669	2.46E-62	3.15E-60	Solyc03g120475_1	3	70343028	70344306	-	919	protein_coding	NA && sp|Q41951|TIP21_ARATH Aquaporin TIP2-1 OS=Arabidopsis thaliana OX=3702 GN=TIP2-1 PE=1 SV=2 && PF00230:Major intrinsic protein	BES1
Solyc07g017780_3	1662.399616	1509.695959	1624.124059	4229.279458	3835.365994	3862.346252	1598.739878	3975.663901	-1.313867698	2.61E-62	3.33E-60	Solyc07g017780_3	7	8086578	8093595	+	3528	protein_coding	NA && sp|Q03194|PMA4_NICPL Plasma membrane ATPase 4 OS=Nicotiana plumbaginifolia OX=4092 GN=PMA4 PE=2 SV=1 && PF00122:E1-E2 ATPase|PF00690:Cation transporter/ATPase, N-terminus|PF00702:haloacid dehalogenase-like hydrolase	GRAS
Solyc08g029000_3	793.9391269	961.2404483	907.0966189	2806.323759	2541.643283	2560.030887	887.425398	2635.99931	-1.570135702	2.97E-62	3.77E-60	Solyc08g029000_3	8	38969588	38973709	-	2947	protein_coding	NA && sp|Q43191|LOX15_SOLTU Probable linoleate 9S-lipoxygenase 5 OS=Solanum tuberosum OX=4113 GN=LOX1.5 PE=2 SV=1 && PF01477:PLAT/LH2 domain|PF00305:Lipoxygenase	NF-YA
Solyc11g069700_2	194.9020239	245.361676	188.9310398	1131.180136	1031.674408	1177.435809	209.7315799	1113.430118	-2.412683128	3.71E-62	4.68E-60	Solyc11g069700_2	11	54602015	54604909	+	1857	protein_coding	NA && sp|P17786|EF1A_SOLLC Elongation factor 1-alpha OS=Solanum lycopersicum OX=4081 PE=2 SV=1 && PF00009:Elongation factor Tu GTP binding domain|PF03143:Elongation factor Tu C-terminal domain|PF03144:Elongation factor Tu domain 2	-
Solyc11g071470_1	728.0163835	611.960886	423.3876314	22.72623734	34.53931788	34.40559182	587.7883003	30.55704901	4.26110687	4.26E-62	5.34E-60	Solyc11g071470_1	11	55224732	55226063	+	1332	protein_coding	NA && sp|Q7XPK7|AHT1_ORYSJ Agmatine hydroxycinnamoyltransferase 1 OS=Oryza sativa subsp. japonica OX=39947 GN=AHT1 PE=1 SV=1 && PF02458:Transferase family	FAR1
Solyc04g071650_3	1758.417525	1319.179834	1388.529329	216.2658069	246.2803536	317.933154	1488.708896	260.1597715	2.513846869	1.77E-61	2.20E-59	Solyc04g071650_3	4	58716236	58723118	+	3930	protein_coding	NA && sp|O48947|CESA2_ARATH Cellulose synthase A catalytic subunit 2 [UDP-forming] OS=Arabidopsis thaliana OX=3702 GN=CESA2 PE=1 SV=1 && PF03552:Cellulose synthase|PF14569:Zinc-binding RING-finger	LBD
Solyc02g084850_3	1235.334887	1420.211113	1338.451222	0	0	3.822843535	1331.332407	1.274281178	9.88961433	2.68E-60	3.31E-58	TAS14	2	48563116	48564178	-	845	protein_coding	NA && sp|P22240|TAS14_SOLLC Abscisic acid and environmental stress-inducible protein TAS14 OS=Solanum lycopersicum OX=4081 GN=TAS14 PE=2 SV=1 && PF00257:Dehydrin	-
Solyc07g043000_3	338.2123357	329.0733066	454.1173789	1572.509003	1639.866745	1562.268725	373.801007	1591.548157	-2.083660617	3.35E-60	4.12E-58	Solyc07g043000_3	7	56656282	56666761	-	1448	protein_coding	NA && sp|Q00451|PRF1_SOLLC 36.4 kDa proline-rich protein OS=Solanum lycopersicum OX=4081 GN=TPRP-F1 PE=2 SV=1 && PF14547:Hydrophobic seed protein	HD-ZIP
Solyc06g005470_3	4630.356172	5001.048278	4891.720537	10427.67742	9918.040215	10735.18179	4841.041662	10360.29981	-1.097656804	1.91E-59	2.34E-57	Solyc06g005470_3	6	482746	484337	+	651	protein_coding	NA && sp|Q43515|MT2Z_SOLLC Metallothionein-like protein type 2 OS=Solanum lycopersicum OX=4081 PE=3 SV=1 && -	-
Solyc04g078750_3	1652.367894	1417.324505	1729.970967	412.0046898	382.1850609	465.7497707	1599.887789	419.9798405	1.929048318	2.75E-59	3.34E-57	Solyc04g078750_3	4	63500272	63502934	+	2321	protein_coding	NA && - && PF03168:Late embryogenesis abundant protein	ERF
Solyc06g076300_3	385.5047385	435.8778009	431.354603	13.19587974	18.77136841	25.48562357	417.5790475	19.15095724	4.435264834	7.30E-59	8.81E-57	Solyc06g076300_3	6	47544439	47548798	-	2565	protein_coding	NA && sp|Q9SNB8|SCL30_ARATH Scarecrow-like protein 30 OS=Arabidopsis thaliana OX=3702 GN=SCL30 PE=1 SV=1 && -	LBD
Solyc04g081440_3	1437.402427	1167.632917	1350.970749	3563.620635	4409.019013	3926.697451	1318.668697	3966.4457	-1.588293218	1.04E-58	1.24E-56	Solyc04g081440_3	4	65500850	65505934	-	2492	protein_coding	NA && sp|Q9SW48|INVB_ARATH Probable alkaline/neutral invertase B OS=Arabidopsis thaliana OX=3702 GN=INVB PE=1 SV=1 && PF12899:Alkaline and neutral invertase	-
Solyc10g008120_3	1018.936316	824.1265705	803.5259887	76.24286074	123.8910315	66.26262128	882.1962918	88.79883785	3.317058268	2.15E-58	2.56E-56	Solyc10g008120_3	10	2255278	2257213	+	1308	protein_coding	NA && sp|B0ZB57|OMT3_HUMLU Probable O-methyltransferase 3 OS=Humulus lupulus OX=3486 GN=OMT3 PE=2 SV=1 && PF08100:Dimerisation domain|PF00891:O-methyltransferase domain	-
Solyc01g010660_3	626.2660622	803.9203149	814.9073766	98.96909808	102.8670989	114.6853061	748.3645846	105.5071677	2.825587931	2.56E-58	3.03E-56	Solyc01g010660_3	1	5617546	5624172	+	1834	protein_coding	NA && sp|O49840|PBL3_ARATH Probable serine/threonine-protein kinase PBL3 OS=Arabidopsis thaliana OX=3702 GN=PBL3 PE=1 SV=1 && PF07714:Protein tyrosine kinase	bHLH
Solyc03g026220_3	1542.018954	1443.303976	1122.204851	246.3230886	267.3042862	311.5617481	1369.175927	275.063041	2.312635822	2.66E-58	3.14E-56	Solyc03g026220_3	3	3655793	3657972	+	1903	protein_coding	NA && sp|Q0WUQ1|BAG1_ARATH BAG family molecular chaperone regulator 1 OS=Arabidopsis thaliana OX=3702 GN=BAG1 PE=1 SV=1 && PF02179:BAG domain	ERF
Solyc03g116580_3	1185.176278	954.0239284	1228.051759	243.3906708	247.782063	234.4677368	1122.417322	241.8801569	2.215696137	2.89E-58	3.38E-56	Solyc03g116580_3	3	67417834	67424207	-	1798	protein_coding	NA && sp|Q9LW07|PGLR3_ARATH Probable polygalacturonase At3g15720 OS=Arabidopsis thaliana OX=3702 GN=At3g15720 PE=3 SV=1 && PF00295:Glycosyl hydrolases family 28|PF06232:Embryo-specific protein 3, (ATS3)	NAC
Solyc02g090930_3	819.734983	796.703795	780.7632128	106.3001424	90.10256838	53.51980949	799.0673303	83.30750675	3.267903926	2.79E-57	3.25E-55	Solyc02g090930_3	2	53035823	53044670	-	3025	protein_coding	NA && sp|F4JFU8|OBL1_ARATH Triacylglycerol lipase OBL1 OS=Arabidopsis thaliana OX=3702 GN=OBL1 PE=1 SV=1 && PF01764:Lipase (class 3)	C2H2
Solyc01g095770_3	425.6316258	453.1974486	358.5137202	25.65865506	22.5256421	16.56565532	412.4475982	21.58331749	4.262983833	3.63E-57	4.20E-55	Solyc01g095770_3	1	86832608	86838900	-	5023	protein_coding	NA && sp|Q9LD40|CNG13_ARATH Putative cyclic nucleotide-gated ion channel 13 OS=Arabidopsis thaliana OX=3702 GN=CNGC13 PE=3 SV=2 && PF00520:Ion transport protein	bHLH
Solyc03g026230_1	1794.245103	1769.490675	1487.547404	345.2921866	207.986762	342.781637	1683.761061	298.6868619	2.492699152	1.23E-56	1.42E-54	Solyc03g026230_1	3	3692532	3694115	-	1584	protein_coding	NA && sp|O82752|DTX49_ARATH Protein DETOXIFICATION 49 OS=Arabidopsis thaliana OX=3702 GN=DTX49 PE=2 SV=1 && PF01554:MatE	HD-ZIP
Solyc04g005160_2	2387.549793	2704.751652	2144.253488	840.8707815	726.8273849	748.0030517	2412.184978	771.900406	1.643109312	2.04E-56	2.33E-54	Solyc04g005160_2	4	107065	114095	-	1993	protein_coding	NA && sp|Q9FWA3|6PGD2_ARATH 6-phosphogluconate dehydrogenase, decarboxylating 2 OS=Arabidopsis thaliana OX=3702 GN=PGD2 PE=1 SV=1 && PF00393:6-phosphogluconate dehydrogenase, C-terminal domain|PF03446:NAD binding domain of 6-phosphogluconate dehydrogenase	-
Solyc01g081010_3	1585.012048	1558.768295	1611.604533	3665.522151	3961.50959	3528.484583	1585.128292	3718.505441	-1.229593389	2.04E-56	2.33E-54	Solyc01g081010_3	1	80173258	80177540	-	2951	protein_coding	NA && sp|Q9C6I8|NOG1_ARATH Nucleolar GTP-binding protein 1 OS=Arabidopsis thaliana OX=3702 GN=At1g50920 PE=2 SV=1 && PF08155:NOGCT (NUC087) domain|PF06858:Nucleolar GTP-binding protein 1 (NOG1)|PF17835:NOG1 N-terminal helical domain	C3H
Solyc12g009110_2	937.2494386	874.6422097	722.7181343	112.1649778	114.8807747	67.53690245	844.8699275	98.19421832	3.109338588	1.24E-55	1.41E-53	Solyc12g009110_2	12	2431675	2436192	-	2165	protein_coding	NA && sp|Q9T003|ASMT_ARATH Acetylserotonin O-methyltransferase OS=Arabidopsis thaliana OX=3702 GN=ASMT PE=1 SV=1 && PF00891:O-methyltransferase domain|PF08100:Dimerisation domain	-
Solyc08g078910_2	1243.933506	980.0034	1157.487154	3268.17955	2999.664672	3509.370365	1127.141353	3259.071529	-1.531457339	7.30E-55	8.22E-53	Solyc08g078910_2	8	62696544	62700466	-	666	protein_coding	NA && sp|P14009|14KD_DAUCA 14 kDa proline-rich protein DC2.15 OS=Daucus carota OX=4039 PE=2 SV=1 && PF14547:Hydrophobic seed protein	Trihelix
Solyc06g053630_3	1421.638292	1451.9638	1510.31018	463.3219999	502.3218187	449.821256	1461.304091	471.8216915	1.63208155	8.11E-55	9.08E-53	Solyc06g053630_3	6	36555633	36561997	-	2055	protein_coding	NA && sp|P48489|PP1_ORYSJ Serine/threonine-protein phosphatase PP1 OS=Oryza sativa subsp. japonica OX=39947 GN=Os03g0268000 PE=2 SV=2 && PF16891:Serine-threonine protein phosphatase N-terminal domain|PF00149:Calcineurin-like phosphoesterase	FAR1
Solyc05g015390_3	495.8536785	463.3005764	497.366653	1452.279876	1497.204345	1543.154507	485.5069693	1497.546243	-1.624323332	5.48E-54	6.11E-52	Solyc05g015390_3	5	10448598	10450425	+	1257	protein_coding	NA && sp|Q9FYF7|Y1736_ARATH REF/SRPP-like protein At1g67360 OS=Arabidopsis thaliana OX=3702 GN=At1g67360 PE=2 SV=1 && PF05755:Rubber elongation factor protein (REF)	-
Solyc11g065940_2	57.32412469	75.05180677	76.25529921	585.0173353	593.1752418	643.5119951	69.54374356	607.2348574	-3.121389464	3.74E-53	4.14E-51	Solyc11g065940_2	11	51853126	51856704	+	2772	protein_coding	NA && sp|Q8VY07|EPN1_ARATH Clathrin interactor EPSIN 1 OS=Arabidopsis thaliana OX=3702 GN=EPSIN1 PE=1 SV=1 && PF01417:ENTH domain	C3H
Solyc11g018777_1	1361.447961	1394.231641	1220.084787	349.6908132	316.8606988	397.5757277	1325.254797	354.7090799	1.899138203	4.06E-53	4.47E-51	Solyc11g018777_1	11	9488879	9498673	+	996	protein_coding	NA && sp|Q02200|PERX_NICSY Lignin-forming anionic peroxidase OS=Nicotiana sylvestris OX=4096 PE=2 SV=1 && PF00141:Peroxidase	NAC
Solyc04g079400_3	1223.870062	1480.82988	1177.973652	256.5865506	324.3692462	323.0302787	1294.224531	301.3286918	2.101241086	9.99E-53	1.09E-50	Solyc04g079400_3	4	63996195	64001331	-	2757	protein_coding	NA && sp|Q9C5H5|M3K5G_ARATH Mitogen-activated protein kinase kinase kinase 5 OS=Arabidopsis thaliana OX=3702 GN=MAPKKK5 PE=1 SV=1 && PF00069:Protein kinase domain	WRKY
Solyc01g109720_3	654.9281245	832.7863944	806.940405	129.7594841	84.09573049	97.48251015	764.8849747	103.7792416	2.882573377	1.35E-52	1.47E-50	Solyc01g109720_3	1	96519271	96521952	-	1897	protein_coding	NA && - && PF00561:alpha/beta hydrolase fold	FAR1
Solyc04g081490_3	1418.772086	1532.788823	1469.337183	484.5820284	521.8440419	486.7754101	1473.632697	497.7338268	1.566240873	1.57E-52	1.71E-50	Solyc04g081490_3	4	65528447	65530881	-	1406	protein_coding	NA && sp|P46263|TBB1_SOLTU Tubulin beta-1 chain OS=Solanum tuberosum OX=4113 GN=TUBB1 PE=2 SV=1 && PF00091:Tubulin/FtsZ family, GTPase domain|PF03953:Tubulin C-terminal domain	NAC
Solyc06g073190_3	2335.958081	2274.647067	2325.217556	4664.010385	4644.7874	4720.574625	2311.940901	4676.45747	-1.016232908	2.67E-52	2.87E-50	FRK2	6	45234784	45237401	-	1304	protein_coding	NA && sp|Q42896|SCRK2_SOLLC Fructokinase-2 OS=Solanum lycopersicum OX=4081 GN=FRK2 PE=2 SV=2 && PF00294:pfkB family carbohydrate kinase	MIKC_MADS
Solyc08g077020_1	1172.27835	1065.158335	989.0426121	211.8671803	223.7547115	275.8818751	1075.493099	237.1679223	2.17807476	2.92E-52	3.13E-50	Solyc08g077020_1	8	61088095	61088466	-	372	protein_coding	NA && - && PF02519:Auxin responsive protein	-
Solyc02g079190_3	652.0619183	798.147099	705.6460524	2420.710829	2011.539839	2163.729441	718.6183565	2198.660036	-1.613815591	3.82E-52	4.07E-50	Solyc02g079190_3	2	44356862	44362751	+	3505	protein_coding	NA && sp|Q570C0|TIR1_ARATH Protein TRANSPORT INHIBITOR RESPONSE 1 OS=Arabidopsis thaliana OX=3702 GN=TIR1 PE=1 SV=2 && PF18791:Transport inhibitor response 1 protein domain|PF18511:F-box	FAR1
Solyc06g075690_3	1890.263012	1527.015607	1999.709861	570.3552467	505.3252377	512.2610337	1805.662827	529.3138394	1.771476523	5.01E-52	5.31E-50	Solyc06g075690_3	6	47178727	47182139	+	2186	protein_coding	NA && sp|Q9FJF5|SOK5_ARATH Protein SOSEKI 5 OS=Arabidopsis thaliana OX=3702 GN=SOK5 PE=1 SV=1 && PF06136:Domain of unknown function (DUF966)	C2H2
Solyc02g085910_3	22.92964987	54.8455511	59.1832173	575.4869777	623.2094313	643.5119951	45.65280609	614.069468	-3.733763028	7.46E-52	7.87E-50	Solyc02g085910_3	2	49328482	49329623	-	1054	protein_coding	NA && sp|Q9M886|LBD41_ARATH LOB domain-containing protein 41 OS=Arabidopsis thaliana OX=3702 GN=LBD41 PE=2 SV=1 && PF03195:Lateral organ boundaries (LOB) domain	LBD
Solyc08g076390_3	1835.805093	1397.118249	1470.475322	335.761829	424.2329261	300.0932175	1567.799555	353.3626576	2.150763889	1.84E-51	1.93E-49	Solyc08g076390_3	8	60520299	60526570	+	3404	protein_coding	NA && sp|Q336N8|JM706_ORYSJ Lysine-specific demethylase JMJ706 OS=Oryza sativa subsp. japonica OX=39947 GN=JMJ706 PE=2 SV=1 && PF02375:jmjN domain|PF02373:JmjC domain, hydroxylase|PF02928:C5HC2 zinc finger	C2H2
Solyc04g014510_3	333.9130263	310.3103549	431.354603	1507.995813	1334.268867	1607.505707	358.5259947	1483.256795	-2.043306621	3.34E-51	3.48E-49	Solyc04g014510_3	4	4780019	4784330	+	1499	protein_coding	NA && sp|P14656|GLN11_ORYSJ Glutamine synthetase cytosolic isozyme 1-1 OS=Oryza sativa subsp. japonica OX=39947 GN=GLN1-1 PE=1 SV=1 && PF00120:Glutamine synthetase, catalytic domain|PF03951:Glutamine synthetase, beta-Grasp domain	-
Solyc11g068440_2	1205.239722	1034.848951	1418.120937	236.0596265	220.0004378	294.3589522	1219.403203	250.1396722	2.284505396	4.36E-51	4.53E-49	Solyc11g068440_2	11	53464357	53470581	+	1865	protein_coding	NA && sp|Q9ZQG9|E1314_ARATH Glucan endo-1,3-beta-glucosidase 14 OS=Arabidopsis thaliana OX=3702 GN=At2g27500 PE=2 SV=2 && PF00332:Glycosyl hydrolases family 17	ERF
Solyc01g065510_2	1054.763894	860.2091699	957.1747259	195.0057784	180.2051368	129.9766802	957.3825967	168.3958651	2.510377272	4.86E-51	5.02E-49	Solyc01g065510_2	1	71590370	71591311	-	942	protein_coding	NA && - && -	-
Solyc10g011910_3	814.0025705	860.2091699	855.8803732	168.614019	185.4611199	202.6107074	843.3640379	185.5619487	2.183007433	6.08E-51	6.25E-49	Solyc10g011910_3	10	4174666	4176501	-	976	protein_coding	NA && sp|O04609|WRK22_ARATH WRKY transcription factor 22 OS=Arabidopsis thaliana OX=3702 GN=WRKY22 PE=2 SV=1 && PF03106:WRKY DNA -binding domain	WRKY
Solyc07g052480_3	636.297784	650.9300934	540.6159272	87.2394272	54.06154103	75.18258952	609.2812682	72.16118592	3.075164644	1.24E-50	1.26E-48	Solyc07g052480_3	7	61097644	61100978	-	3041	nontranslating_CDS	NA && sp|P49297|ACEA_SOLLC Isocitrate lyase OS=Solanum lycopersicum OX=4081 PE=2 SV=1 && PF00463:Isocitrate lyase family	AP2
Solyc10g007280_3	1218.13765	1467.840144	1218.946649	231.6609999	265.8025767	340.8702152	1301.641481	279.4445973	2.216912191	1.44E-50	1.47E-48	Solyc10g007280_3	10	1673451	1675179	-	1638	protein_coding	NA && sp|Q8VZG2|HSR4_ARATH Protein HYPER-SENSITIVITY-RELATED 4 OS=Arabidopsis thaliana OX=3702 GN=HSR4 PE=2 SV=1 && PF00004:ATPase family associated with various cellular activities (AAA)|PF14363:Domain associated at C-terminal with AAA	NAC
Solyc03g097050_3	5246.590512	4876.924136	5272.997033	2575.395863	2480.824049	2448.531284	5132.17056	2501.583732	1.037066418	1.61E-50	1.63E-48	Solyc03g097050_3	3	60834695	60840612	-	4258	protein_coding	NA && sp|Q9LFL0|CSLD2_ARATH Cellulose synthase-like protein D2 OS=Arabidopsis thaliana OX=3702 GN=CSLD2 PE=3 SV=1 && PF14570:RING/Ubox like zinc-binding domain|PF03552:Cellulose synthase	G2-like
Solyc02g062550_3	1210.972134	1249.901244	1149.520182	368.018424	365.6662567	383.5586347	1203.46452	372.4144384	1.691160432	2.01E-50	2.02E-48	Solyc02g062550_3	2	34820696	34822701	-	1720	protein_coding	NA && sp|Q8VZG2|HSR4_ARATH Protein HYPER-SENSITIVITY-RELATED 4 OS=Arabidopsis thaliana OX=3702 GN=HSR4 PE=2 SV=1 && PF14363:Domain associated at C-terminal with AAA|PF00004:ATPase family associated with various cellular activities (AAA)	NAC
Solyc06g068520_3	276.5889016	330.5166106	389.2434676	7.331044302	13.51538526	7.64568707	332.1163266	9.49737221	5.140676525	2.89E-50	2.90E-48	Solyc06g068520_3	6	42585917	42587534	+	1111	protein_coding	NA && sp|Q7XAD0|HSY1_SOLLC Hydroxyproline-rich systemin OS=Solanum lycopersicum OX=4081 PE=1 SV=1 && -	-
Solyc09g010980_1	812.5694674	663.9198291	662.3967782	116.5636044	123.8910315	132.5252426	712.9620249	124.3266262	2.517837321	3.19E-50	3.18E-48	Solyc09g010980_1	9	4333413	4333640	+	228	protein_coding	NA && - && -	-
Solyc09g083360_3	388.3709448	301.6505311	379.0002184	10.26346202	2.25256421	12.74281178	356.3405648	8.419612672	5.377523108	5.90E-50	5.86E-48	Solyc09g083360_3	9	69446701	69450206	+	2574	protein_coding	NA && sp|Q08112|RS151_ARATH 40S ribosomal protein S15-1 OS=Arabidopsis thaliana OX=3702 GN=RPS15A PE=2 SV=1 && -	bHLH
Solyc12g007030_2	749.5129303	584.5381104	646.4628351	1879.679759	1930.447528	2022.28423	660.1712919	1944.137172	-1.558779106	1.01E-49	9.97E-48	Solyc12g007030_2	12	1463582	1469622	-	1806	protein_coding	NA && sp|Q56YU0|AL2C4_ARATH Aldehyde dehydrogenase family 2 member C4 OS=Arabidopsis thaliana OX=3702 GN=ALDH2C4 PE=1 SV=2 && PF00171:Aldehyde dehydrogenase family	NAC
Solyc02g078900_3	729.4494866	860.2091699	740.928355	167.8809145	147.9183831	152.9137414	776.8623372	156.2376797	2.313534162	1.02E-49	9.99E-48	Solyc02g078900_3	2	44085754	44090997	-	3442	protein_coding	NA && sp|O80874|NDA2_ARATH Internal alternative NAD(P)H-ubiquinone oxidoreductase A2, mitochondrial OS=Arabidopsis thaliana OX=3702 GN=NDA2 PE=1 SV=1 && PF07992:Pyridine nucleotide-disulphide oxidoreductase	-
Solyc04g007760_3	2000.611952	1892.171513	2015.643804	658.3277783	536.8611366	715.5088817	1969.475756	636.8992655	1.627650659	2.61E-49	2.55E-47	Solyc04g007760_3	4	1436136	1437197	+	547	protein_coding	NA && sp|P85524|KIRO_ACTDE Kirola OS=Actinidia deliciosa OX=3627 PE=1 SV=1 && PF00407:Pathogenesis-related protein Bet v I family	-
Solyc04g063230_3	1351.416239	1138.766837	1229.189898	333.5625158	271.0585599	351.7016052	1239.790992	318.774227	1.958002982	3.50E-49	3.41E-47	Solyc04g063230_3	4	55381819	55388491	-	3036	protein_coding	NA && sp|Q8L7V3|PMTQ_ARATH Probable methyltransferase PMT26 OS=Arabidopsis thaliana OX=3702 GN=At5g64030 PE=2 SV=1 && PF03141:Putative S-adenosyl-L-methionine-dependent methyltransferase	NF-YB
Solyc06g082440_1	1116.387328	1169.076221	1246.26198	352.6232309	297.3384757	349.7901835	1177.241843	333.25063	1.820571779	6.42E-49	6.21E-47	Solyc06g082440_1	6	48296596	48297855	-	1260	protein_coding	NA && sp|O22932|CIPKB_ARATH CBL-interacting serine/threonine-protein kinase 11 OS=Arabidopsis thaliana OX=3702 GN=CIPK11 PE=1 SV=1 && PF03822:NAF domain|PF00069:Protein kinase domain	bHLH
Solyc04g040130_1	156.2082398	86.59823858	200.3124278	1059.335902	1220.889802	1084.413283	147.706302	1121.546329	-2.913593154	8.49E-49	8.18E-47	Solyc04g040130_1	4	12036164	12037291	+	1128	protein_coding	NA && sp|Q8GZC3|FAD2_VERFO Delta(12)-fatty-acid desaturase FAD2 OS=Vernicia fordii OX=73154 GN=FAD2 PE=1 SV=1 && PF00487:Fatty acid desaturase|PF11960:Domain of unknown function (DUF3474)	HSF
Solyc01g107590_3	474.3571318	443.0943208	470.051322	1408.29361	1327.511174	1384.5065	462.5009248	1373.437095	-1.569752486	1.09E-47	1.05E-45	Solyc01g107590_3	1	94985426	94989323	+	1632	protein_coding	NA && sp|P30359|CADH1_TOBAC Probable cinnamyl alcohol dehydrogenase 1 OS=Nicotiana tabacum OX=4097 GN=CAD14 PE=1 SV=1 && PF08240:Alcohol dehydrogenase GroES-like domain|PF00107:Zinc-binding dehydrogenase	HB-other
Solyc08g067500_2	652.0619183	489.280048	754.5860205	79.90838289	84.09573049	63.07691833	631.9759956	75.69367724	3.0664471	1.14E-47	1.09E-45	Solyc08g067500_2	8	56575539	56583027	+	705	protein_coding	NA && sp|Q39950|NLTP_HELAN Non-specific lipid-transfer protein OS=Helianthus annuus OX=4232 PE=3 SV=1 && PF00234:Protease inhibitor/seed storage/LTP family|PF14368:Probable lipid transfer	MYB_related
Solyc01g007020_3	1374.345889	1219.59186	998.1477225	291.7755632	301.8436041	304.5532016	1197.361824	299.3907896	1.998058491	1.20E-47	1.14E-45	Solyc01g007020_3	1	1576500	1577252	-	753	protein_coding	NA && sp|Q9SVC6|PUB22_ARATH E3 ubiquitin-protein ligase PUB22 OS=Arabidopsis thaliana OX=3702 GN=PUB22 PE=1 SV=1 && -	Dof
Solyc12g087790_1	3426.549553	3095.887029	3206.136983	1244.078218	1449.900496	1421.460654	3242.857855	1371.813123	1.240935567	1.28E-47	1.21E-45	Solyc12g087790_1	12	64276147	64276372	-	156	protein_coding	NA && - && -	-
Solyc08g005450_2	785.3405082	777.9408433	775.0725188	1999.175781	1850.856926	1932.447407	779.4512901	1927.493371	-1.306396992	3.59E-47	3.37E-45	Solyc08g005450_2	8	329712	333053	+	1009	protein_coding	NA && sp|Q84Y18|CXIP4_ARATH CAX-interacting protein 4 OS=Arabidopsis thaliana OX=3702 GN=CXIP4 PE=1 SV=2 && PF13917:Zinc knuckle	-
Solyc01g107080_3	157.6413429	178.9696931	138.8529329	939.1067751	913.7902143	736.5345211	158.4879896	863.1438369	-2.449526906	4.66E-47	4.36E-45	Solyc01g107080_3	1	94619460	94622992	-	2159	protein_coding	NA && sp|Q9SND9|Y3028_ARATH Uncharacterized acetyltransferase At3g50280 OS=Arabidopsis thaliana OX=3702 GN=At3g50280 PE=3 SV=1 && PF02458:Transferase family	NAC
Solyc09g009020_3	1394.409333	1359.592346	1564.940842	3231.524328	3200.142887	3415.073558	1439.647507	3282.246924	-1.187422428	5.33E-47	4.96E-45	PGH1	9	2370014	2374990	+	1861	protein_coding	NA && sp|P26300|ENO_SOLLC Enolase OS=Solanum lycopersicum OX=4081 GN=PGH1 PE=2 SV=1 && PF00113:Enolase, C-terminal TIM barrel domain|PF03952:Enolase, N-terminal domain	C3H
Solyc04g080940_3	1084.85906	1109.900758	785.315768	216.2658069	196.723941	194.3278797	993.3585285	202.4392092	2.293458188	5.36E-47	4.97E-45	Solyc04g080940_3	4	65072208	65075352	-	1661	protein_coding	NA && sp|Q94AP3|WAT1_ARATH Protein WALLS ARE THIN 1 OS=Arabidopsis thaliana OX=3702 GN=WAT1 PE=1 SV=1 && PF00892:EamA-like transporter family	ERF
Solyc12g057150_1	2861.906925	3108.876765	2929.569256	1145.842224	1215.633818	1362.84372	2966.784315	1241.439921	1.256078737	8.65E-47	7.99E-45	Solyc12g057150_1	12	64172095	64172442	-	348	protein_coding	NA && - && -	-
Solyc07g008250_3	874.1929015	679.7961729	693.1265256	2044.628256	2407.240285	2293.706121	749.0385333	2248.524887	-1.587328926	9.13E-47	8.40E-45	Solyc07g008250_3	7	2976097	2979715	-	2992	protein_coding	NA && sp|Q708Y0|EBF2_ARATH EIN3-binding F-box protein 2 OS=Arabidopsis thaliana OX=3702 GN=EBF2 PE=1 SV=1 && -	-
Solyc08g068730_1	1018.936316	1145.983357	1002.700278	2524.811658	2472.564647	2762.641595	1055.873317	2586.672633	-1.294055098	1.25E-46	1.15E-44	Solyc08g068730_1	8	57933378	57934073	-	696	protein_coding	NA && sp|Q9SMB8|THT11_TOBAC Tyramine N-feruloyltransferase 4/11 OS=Nicotiana tabacum OX=4097 GN=THT4 PE=2 SV=1 && PF00583:Acetyltransferase (GNAT) family	-
Solyc07g065120_3	1957.618858	2449.286848	2284.24456	800.5500378	648.7384923	590.6293262	2230.383422	679.9726188	1.714673341	1.29E-46	1.17E-44	Solyc07g065120_3	7	67149629	67157360	+	3336	protein_coding	NA && sp|Q9FJ62|GPDL4_ARATH Glycerophosphodiester phosphodiesterase GDPDL4 OS=Arabidopsis thaliana OX=3702 GN=GDPDL4 PE=1 SV=1 && PF03009:Glycerophosphoryl diester phosphodiesterase family	FAR1
Solyc10g045420_2	951.5804698	946.8074085	950.3458931	120.2291266	53.31068629	133.1623831	949.5779238	102.2340653	3.210877591	1.33E-46	1.21E-44	Solyc10g045420_2	10	33322744	33326726	+	2514	protein_coding	NA && sp|O64884|OFT20_ARATH O-fucosyltransferase 20 OS=Arabidopsis thaliana OX=3702 GN=OFUT20 PE=1 SV=1 && PF10250:GDP-fucose protein O-fucosyltransferase	MIKC_MADS
Solyc08g078070_3	1672.431338	2006.192527	1694.688664	634.8684366	502.3218187	572.7893897	1791.104176	569.993215	1.651118177	1.55E-46	1.40E-44	Solyc08g078070_3	8	62039190	62042139	+	791	protein_coding	NA && sp|Q05737|YPTM2_MAIZE GTP-binding protein YPTM2 OS=Zea mays OX=4577 GN=YPTM2 PE=2 SV=1 && PF00071:Ras family	NAC
Solyc01g098760_3	1401.574849	1415.881201	1335.036806	464.7882088	514.3354945	482.315426	1384.164285	487.1463764	1.506335136	1.78E-46	1.60E-44	Solyc01g098760_3	1	89059098	89080069	+	2368	protein_coding	NA && sp|Q8LA32|LUL4_ARATH Probable E3 ubiquitin-protein ligase LUL4 OS=Arabidopsis thaliana OX=3702 GN=LUL4 PE=2 SV=1 && PF00403:Heavy-metal-associated domain|PF13920:Zinc finger, C3HC4 type (RING finger)	C3H
Solyc01g007040_3	763.8439614	567.2184627	673.7781661	94.5704715	62.32094313	101.3053537	668.2801968	86.06558944	2.953421971	2.05E-46	1.84E-44	Solyc01g007040_3	1	1582775	1583263	-	489	protein_coding	NA && sp|Q9SVC6|PUB22_ARATH E3 ubiquitin-protein ligase PUB22 OS=Arabidopsis thaliana OX=3702 GN=PUB22 PE=1 SV=1 && PF04564:U-box domain	Dof
Solyc07g066610_3	1150.781803	1287.427147	1460.232073	3423.597689	3580.075384	3110.520356	1299.480341	3371.39781	-1.373282457	2.44E-46	2.18E-44	Solyc07g066610_3	7	68113060	68119347	-	2854	protein_coding	NA && sp|Q42961|PGKH_TOBAC Phosphoglycerate kinase, chloroplastic OS=Nicotiana tabacum OX=4097 PE=2 SV=1 && PF00162:Phosphoglycerate kinase	NAC
Solyc08g078870_2	755.2453427	661.0332212	827.4269033	2027.766854	1952.97317	2085.998289	747.9018224	2022.246104	-1.432530272	6.97E-46	6.18E-44	Solyc08g078870_2	8	62683148	62683588	+	327	protein_coding	NA && sp|P14009|14KD_DAUCA 14 kDa proline-rich protein DC2.15 OS=Daucus carota OX=4039 PE=2 SV=1 && PF14547:Hydrophobic seed protein	Trihelix
Solyc02g072150_3	1996.312642	1629.490189	1594.532451	376.0825727	540.6154103	483.5897072	1740.111761	466.7625634	1.897838843	4.11E-45	3.63E-43	Solyc02g072150_3	2	41998514	42004874	-	5008	protein_coding	NA && sp|Q9LMI0|TPS7_ARATH Probable alpha,alpha-trehalose-phosphate synthase [UDP-forming] 7 OS=Arabidopsis thaliana OX=3702 GN=TPS7 PE=1 SV=1 && PF02358:Trehalose-phosphatase|PF00982:Glycosyltransferase family 20	-
Solyc06g076050_3	2622.578704	2494.029271	2524.391845	1158.305	997.8859448	1124.55314	2546.99994	1093.581361	1.219308064	4.24E-45	3.73E-43	Solyc06g076050_3	6	47365010	47367963	+	2116	protein_coding	NA && sp|Q94B55|XB31_ARATH Putative E3 ubiquitin-protein ligase XBAT31 OS=Arabidopsis thaliana OX=3702 GN=XBAT31 PE=2 SV=1 && PF12796:Ankyrin repeats (3 copies)	-
Solyc01g005470_3	1130.718359	1234.0249	1476.166016	288.8431455	376.178223	302.6417799	1280.303092	322.5543828	1.990996098	5.08E-45	4.45E-43	Solyc01g005470_3	1	322539	324960	-	867	protein_coding	NA && sp|Q9LQU4|PCR2_ARATH Protein PLANT CADMIUM RESISTANCE 2 OS=Arabidopsis thaliana OX=3702 GN=PCR2 PE=1 SV=1 && PF04749:PLAC8 family	B3
Solyc07g020860_3	1486.127932	1805.573274	1432.916742	4180.894566	3655.911712	4145.873814	1574.87265	3994.226697	-1.344032223	5.98E-45	5.21E-43	Solyc07g020860_3	7	14286090	14291641	+	927	protein_coding	NA && sp|Q9XEX2|PRX2B_ARATH Peroxiredoxin-2B OS=Arabidopsis thaliana OX=3702 GN=PRXIIB PE=1 SV=1 && PF08534:Redoxin	ZF-HD
Solyc07g053220_2	584.7060718	450.3108406	524.6819841	1501.397873	1691.675721	1618.337097	519.8996322	1603.803564	-1.624836209	6.74E-45	5.84E-43	Solyc07g053220_2	7	61794132	61797592	+	3461	protein_coding	NA && sp|O64477|Y2913_ARATH G-type lectin S-receptor-like serine/threonine-protein kinase At2g19130 OS=Arabidopsis thaliana OX=3702 GN=At2g19130 PE=2 SV=1 && -	MYB_related
Solyc08g074680_2	4601.694109	4429.499904	4357.933443	554.2269492	313.1064251	388.6557594	4463.042485	418.6630446	3.414212241	1.41E-44	1.22E-42	Solyc08g074680_2	8	58950489	58963139	-	5534	nontranslating_CDS	NA && sp|Q08303|PPOA_SOLLC Polyphenol oxidase A, chloroplastic OS=Solanum lycopersicum OX=4081 PE=1 SV=2 && PF00264:Common central domain of tyrosinase|PF12143:Protein of unknown function (DUF_B2219)|PF12142:Polyphenol oxidase middle domain	bZIP
Solyc10g074890_2	323.8813045	246.80498	229.9040364	1031.477933	1163.073987	1093.970392	266.8634403	1096.174104	-2.04245532	4.75E-44	4.08E-42	Solyc10g074890_2	10	58650044	58680780	-	6589	protein_coding	NA && sp|C0LGU1|Y5374_ARATH Probable LRR receptor-like serine/threonine-protein kinase At5g37450 OS=Arabidopsis thaliana OX=3702 GN=At5g37450 PE=1 SV=1 && PF11891:Protein RETICULATA-related	WRKY
Solyc08g068640_3	1235.334887	1449.077192	1085.78441	335.0287246	344.6423241	265.0504851	1256.732163	314.9071779	1.997233281	7.91E-44	6.77E-42	Solyc08g068640_3	8	57803811	57840311	-	5247	protein_coding	NA && sp|P54772|DCHS_SOLLC Histidine decarboxylase OS=Solanum lycopersicum OX=4081 GN=HDC PE=2 SV=1 && PF00282:Pyridoxal-dependent decarboxylase conserved domain	MYB_related
Solyc08g068680_3	1746.9527	1680.005829	1833.541597	631.9360188	590.9226776	718.057444	1753.500042	646.9720468	1.437826517	8.19E-44	6.99E-42	Solyc08g068680_3	8	57876464	57878575	-	1633	protein_coding	NA && sp|P54772|DCHS_SOLLC Histidine decarboxylase OS=Solanum lycopersicum OX=4081 GN=HDC PE=2 SV=1 && PF00282:Pyridoxal-dependent decarboxylase conserved domain	MYB_related
Solyc12g100270_2	855.5625609	572.9916786	768.243686	2351.799012	2184.236429	2400.108599	732.2659752	2312.048013	-1.657832374	8.49E-44	7.21E-42	Solyc12g100270_2	12	68023915	68026963	+	2168	protein_coding	NA && sp|F4HVY0|CER1_ARATH Very-long-chain aldehyde decarbonylase CER1 OS=Arabidopsis thaliana OX=3702 GN=CER1 PE=1 SV=1 && PF04116:Fatty acid hydroxylase superfamily|PF12076:WAX2 C-terminal domain	FAR1
Solyc01g028860_3	1364.314168	1462.066928	1490.96182	3223.46018	3450.177514	2999.020753	1439.114305	3224.219482	-1.162865289	1.23E-43	1.04E-41	Solyc01g028860_3	1	40991055	40995946	+	3236	protein_coding	NA && sp|Q9LJE5|ECT2_ARATH YTH domain-containing protein ECT2 OS=Arabidopsis thaliana OX=3702 GN=ECT2 PE=1 SV=1 && PF04146:YT521-B-like domain	C3H
Solyc01g095320_3	2404.747031	2518.565439	2334.322667	1120.916674	1010.650475	1097.156095	2419.211712	1076.241081	1.167857739	1.65E-43	1.39E-41	Solyc01g095320_3	1	86504563	86509039	+	4039	protein_coding	NA && sp|O82345|BAG6_ARATH BAG family molecular chaperone regulator 6 OS=Arabidopsis thaliana OX=3702 GN=BAG6 PE=1 SV=1 && PF02179:BAG domain	-
Solyc07g009090_3	214.9654676	184.742909	219.6607873	939.1067751	874.745768	811.07997	206.4563879	874.9775044	-2.080657754	2.39E-43	2.00E-41	Solyc07g009090_3	7	4040469	4041464	-	828	protein_coding	NA && - && -	-
Solyc09g009260_3	796.8053331	799.5904029	951.4840319	2053.425509	2347.922761	2293.06898	849.293256	2231.472417	-1.391121461	3.14E-43	2.62E-41	Solyc09g009260_3	9	2642598	2645905	-	2509	protein_coding	NA && sp|Q9SJQ9|ALFC6_ARATH Fructose-bisphosphate aldolase 6, cytosolic OS=Arabidopsis thaliana OX=3702 GN=FBA6 PE=1 SV=1 && PF00274:Fructose-bisphosphate aldolase class-I	ERF
Solyc07g007325_1	51.59171222	69.27859087	72.84088282	485.3151328	589.4209682	512.2610337	64.5703953	528.9990449	-3.027781172	7.61E-43	6.33E-41	Solyc07g007325_1	7	2067417	2069060	+	410	protein_coding	NA && - && -	-
Solyc09g082060_3	934.3832324	1047.838687	830.8413197	2337.870028	2350.175325	2647.319148	937.6877463	2445.1215	-1.385265915	7.89E-43	6.53E-41	Solyc09g082060_3	9	68325515	68330837	+	1571	protein_coding	NA && sp|O81154|CYSK_SOLTU Cysteine synthase OS=Solanum tuberosum OX=4113 PE=2 SV=1 && PF00291:Pyridoxal-phosphate dependent enzyme	GeBP
Solyc12g100260_1	100.3172182	86.59823858	40.97299659	671.5236581	667.5098608	760.7458635	75.96281779	699.9264608	-3.222903983	1.02E-42	8.38E-41	Solyc12g100260_1	12	68019981	68020145	+	165	protein_coding	NA && sp|P48630|FD6E1_SOYBN Omega-6 fatty acid desaturase, endoplasmic reticulum isozyme 1 OS=Glycine max OX=3847 GN=FAD2-1 PE=2 SV=1 && -	-
Solyc10g078300_2	1265.430052	1489.489704	1567.21712	3219.061553	3474.204866	3386.402232	1440.712292	3359.88955	-1.220224051	1.72E-42	1.41E-40	Solyc10g078300_2	10	60265036	60270801	+	3345	protein_coding	NA && sp|Q15032|R3HD1_HUMAN R3H domain-containing protein 1 OS=Homo sapiens OX=9606 GN=R3HDM1 PE=1 SV=3 && PF12752:SUZ domain|PF01424:R3H domain	M-type_MADS
Solyc04g011750_3	1530.554129	1521.242391	1284.958699	450.8592246	455.0179703	342.781637	1445.585073	416.2196106	1.796996989	1.74E-42	1.43E-40	Solyc04g011750_3	4	4202802	4204122	+	696	protein_coding	NA && - && -	-
Solyc08g036625_1	322.4482014	295.8773152	305.0211968	5.864835442	3.003418946	0	307.7822378	2.956084796	6.760393826	2.44E-42	1.99E-40	Solyc08g036625_1	8	10671485	10672687	+	628	protein_coding	NA && - && -	-
Solyc12g098560_2	674.9915682	786.6006671	928.721256	173.0126455	123.1401768	147.1794761	796.7711638	147.7774328	2.431789792	3.81E-42	3.09E-40	Solyc12g098560_2	12	66985299	67011986	-	3335	protein_coding	NA && sp|P80595|APY_SOLTU Apyrase OS=Solanum tuberosum OX=4113 GN=RROP1 PE=1 SV=2 && PF00332:Glycosyl hydrolases family 17|PF10294:Lysine methyltransferase|PF07983:X8 domain|PF01150:GDA1/CD39 (nucleoside phosphatase) family	ERF
Solyc02g091250_1	325.3144076	291.5474032	343.7179158	20.52692405	10.51196631	22.29992062	320.1932422	17.77960366	4.161263626	4.06E-42	3.28E-40	Solyc02g091250_1	2	53248152	53248544	-	393	protein_coding	NA && - && -	-
Solyc08g068710_1	424.1985227	420.0014571	475.742016	33.72280379	59.31752418	45.87412242	439.9806653	46.3048168	3.250228536	5.20E-42	4.18E-40	Solyc08g068710_1	8	57905614	57906318	-	705	protein_coding	NA && sp|Q9SMB8|THT11_TOBAC Tyramine N-feruloyltransferase 4/11 OS=Nicotiana tabacum OX=4097 GN=THT4 PE=2 SV=1 && PF00583:Acetyltransferase (GNAT) family	-
Solyc01g110480_3	1231.035578	1297.530275	1266.748478	463.3219999	397.2021556	450.4583966	1265.104777	436.994184	1.533046081	7.03E-42	5.64E-40	Solyc01g110480_3	1	97093044	97095670	+	1932	protein_coding	NA && sp|Q8H1F0|BZP29_ARATH bZIP transcription factor 29 OS=Arabidopsis thaliana OX=3702 GN=BZIP29 PE=2 SV=1 && PF00170:bZIP transcription factor	bZIP
Solyc05g010420_2	7740.189936	8008.893765	7570.899259	3713.173939	3439.665548	4128.671018	7773.327653	3760.503502	1.04716825	1.02E-41	8.11E-40	Solyc05g010420_2	5	4642692	4655639	-	1331	protein_coding	NA && sp|Q38IY3|DCAM_SOLCI S-adenosylmethionine decarboxylase proenzyme OS=Solanum chilense OX=4083 GN=SAMDC PE=2 SV=1 && PF01536:Adenosylmethionine decarboxylase	-
Solyc04g080960_3	1023.235626	1024.745823	844.4989853	2328.33967	2634.74927	2354.234477	964.1601447	2439.107806	-1.34132539	1.80E-41	1.43E-39	Solyc04g080960_3	4	65102722	65105099	+	1368	protein_coding	NA && sp|P25804|CYSP_PEA Cysteine proteinase 15A OS=Pisum sativum OX=3888 PE=2 SV=1 && PF08246:Cathepsin propeptide inhibitor domain (I29)|PF00112:Papain family cysteine protease	BBR-BPC
Solyc12g010390_2	1229.602475	1293.200363	1192.769456	444.9943891	418.2260882	457.466943	1238.524098	440.2291401	1.491214498	2.09E-41	1.66E-39	Solyc12g010390_2	12	3440156	3442129	-	1974	protein_coding	NA && sp|Q9FYQ8|TMN11_ARATH Transmembrane 9 superfamily member 11 OS=Arabidopsis thaliana OX=3702 GN=TMN11 PE=2 SV=1 && PF02990:Endomembrane protein 70	-
Solyc10g075150_2	5.732412469	17.31964772	15.93394312	355.5556487	340.1371956	386.107197	12.99533443	360.6000138	-4.777135058	2.14E-41	1.69E-39	Solyc10g075150_2	10	58931442	58933070	-	763	protein_coding	NA && sp|P93224|NLTP2_SOLLC Non-specific lipid-transfer protein 2 OS=Solanum lycopersicum OX=4081 GN=LE16 PE=2 SV=1 && -	ARF
Solyc02g081390_3	1663.832719	1528.458911	1756.148159	585.7504397	504.5743829	640.9634327	1649.47993	577.0960851	1.514631817	5.58E-41	4.38E-39	Solyc02g081390_3	2	45929669	45944446	-	3050	protein_coding	NA && sp|Q8H191|PAO4_ARATH Probable polyamine oxidase 4 OS=Arabidopsis thaliana OX=3702 GN=PAO4 PE=1 SV=1 && PF01965:DJ-1/PfpI family|PF01593:Flavin containing amine oxidoreductase	bHLH
Solyc03g063600_3	1013.203904	1138.766837	1117.652296	291.7755632	289.8299283	362.5329952	1089.874346	314.7128289	1.790480931	1.10E-40	8.64E-39	Solyc03g063600_3	3	37406595	37411503	+	2441	protein_coding	NA && sp|Q9M682|GMK2_ARATH Guanylate kinase 2 OS=Arabidopsis thaliana OX=3702 GN=GK-2 PE=2 SV=1 && PF00625:Guanylate kinase	-
Solyc02g071780_3	786.7736113	832.7863944	878.6431491	232.3941044	180.2051368	175.213662	832.7343849	195.9376344	2.08919578	1.38E-40	1.07E-38	Solyc02g071780_3	2	41696450	41702639	-	1992	protein_coding	NA && sp|Q9C7N2|CAD1_ARATH MACPF domain-containing protein CAD1 OS=Arabidopsis thaliana OX=3702 GN=CAD1 PE=2 SV=1 && PF01823:MAC/Perforin domain	-
Solyc06g069120_3	1632.30445	1451.9638	1343.003777	3257.916088	3178.3681	3362.82803	1475.757343	3266.370739	-1.147863085	1.52E-40	1.18E-38	Solyc06g069120_3	6	43018686	43020507	+	1255	protein_coding	NA && - && -	-
Solyc12g005910_2	733.748796	910.7248091	949.2077543	209.667867	226.7581304	207.0706915	864.5604531	214.4988963	2.012571606	2.73E-40	2.12E-38	Solyc12g005910_2	12	541681	547122	+	1276	protein_coding	NA && - && -	-
Solyc03g007870_3	501.586091	512.3729116	496.2285142	1351.844569	1408.603486	1294.032537	503.395839	1351.493531	-1.425007007	3.14E-40	2.42E-38	Solyc03g007870_3	3	2399854	2401037	-	981	protein_coding	NA && sp|O03982|HIP39_ARATH Heavy metal-associated isoprenylated plant protein 39 OS=Arabidopsis thaliana OX=3702 GN=HIPP39 PE=2 SV=1 && PF00403:Heavy-metal-associated domain	SBP
Solyc06g082080_3	530.2481534	521.0327355	537.2015108	102.6346202	70.58034523	71.35974599	529.4941332	81.52490382	2.701212673	4.69E-40	3.60E-38	Solyc06g082080_3	6	48059339	48061577	+	1625	protein_coding	NA && sp|O80871|P2C25_ARATH Probable protein phosphatase 2C 25 OS=Arabidopsis thaliana OX=3702 GN=At2g30020 PE=1 SV=1 && PF00481:Protein phosphatase 2C	NAC
Solyc03g114150_3	700.7874243	701.4457325	892.3008146	2014.570974	2157.205658	1991.064341	764.8446571	2054.280324	-1.421748524	4.99E-40	3.82E-38	Solyc03g114150_3	3	65653816	65658520	+	1997	protein_coding	NA && sp|C7A2A0|BALDH_ANTMA Benzaldehyde dehydrogenase, mitochondrial OS=Antirrhinum majus OX=4151 GN=BALDH PE=1 SV=1 && PF00171:Aldehyde dehydrogenase family	bHLH
Solyc10g086410_3	1511.923789	1400.004857	1311.135891	3180.207018	2911.063813	3009.215003	1407.688179	3033.495278	-1.108943184	5.33E-40	4.06E-38	Solyc10g086410_3	10	65359904	65363233	+	2329	protein_coding	NA && sp|P27322|HSP72_SOLLC Heat shock cognate 70 kDa protein 2 OS=Solanum lycopersicum OX=4081 GN=HSC-2 PE=2 SV=1 && PF00012:Hsp70 protein	GATA
Solyc03g118090_3	472.9240287	420.0014571	408.5918271	53.51662341	22.5256421	33.13131064	433.8391043	36.39119205	3.575558142	1.01E-39	7.63E-38	Solyc03g118090_3	3	68544603	68549895	-	3047	protein_coding	NA && sp|Q9FI43|MAPC2_ARATH Calcium-dependent mitochondrial ATP-magnesium/phosphate carrier protein 2 OS=Arabidopsis thaliana OX=3702 GN=APC2 PE=1 SV=1 && PF13499:EF-hand domain pair|PF00153:Mitochondrial carrier protein	TALE
Solyc02g062970_3	745.2136209	913.6114171	1002.700278	2284.353405	2428.264218	2259.300529	887.1751052	2323.972717	-1.386773222	1.30E-39	9.83E-38	Solyc02g062970_3	2	35503254	35513566	+	2610	protein_coding	NA && sp|F4JQH3|AMPP1_ARATH Aminopeptidase P1 OS=Arabidopsis thaliana OX=3702 GN=APP1 PE=1 SV=1 && PF16189:Creatinase/Prolidase N-terminal domain|PF16188:C-terminal region of peptidase_M24|PF00557:Metallopeptidase family M24|PF01321:Creatinase/Prolidase N-terminal domain	-
Solyc11g005380_2	1460.332076	1225.365076	1449.988824	508.0413701	472.2876293	500.7925031	1378.561992	493.7071675	1.481857307	2.56E-39	1.92E-37	Solyc11g005380_2	11	303996	306518	+	2379	protein_coding	NA && sp|Q9C6K3|DF1_ARATH Trihelix transcription factor DF1 OS=Arabidopsis thaliana OX=3702 GN=DF1 PE=4 SV=1 && PF13837:Myb/SANT-like DNA-binding domain	Trihelix
Solyc09g075890_3	1251.099021	1040.622167	1173.421097	358.4880664	243.2769346	258.0419386	1155.047428	286.6023132	2.011642999	2.76E-39	2.06E-37	Solyc09g075890_3	9	67954938	67957452	-	1017	protein_coding	NA && - && PF13419:Haloacid dehalogenase-like hydrolase	LBD
Solyc02g072210_1	464.32541	562.8885508	529.2345393	44.71937024	40.54615577	79.64257365	518.8161667	54.96936655	3.230068576	2.81E-39	2.09E-37	Solyc02g072210_1	2	42093038	42093715	+	678	protein_coding	NA && - && -	-
Solyc01g088560_3	908.5873763	764.9511075	801.2497111	185.4754208	203.4816336	135.7109455	824.9293983	174.8893333	2.240624517	5.68E-39	4.21E-37	Solyc01g088560_3	1	83208469	83213794	-	961	protein_coding	NA && sp|O80501|RAH1B_ARATH Ras-related protein RABH1b OS=Arabidopsis thaliana OX=3702 GN=RABH1B PE=1 SV=1 && PF00071:Ras family	bHLH
Solyc03g116510_1	653.4950214	1049.281991	883.1957043	176.6781677	113.3790652	147.1794761	861.9909055	145.7455697	2.563795351	3.11E-38	2.28E-36	Solyc03g116510_1	3	67391192	67391473	+	282	protein_coding	NA && - && -	-
Solyc01g109890_3	617.6674435	584.5381104	674.9163049	81.37459175	133.6521431	105.7653378	625.7072863	106.9306909	2.550328653	3.12E-38	2.29E-36	Solyc01g109890_3	1	96649709	96655945	+	2466	protein_coding	NA && sp|Q8GYX8|DNJ10_ARATH Chaperone protein dnaJ 10 OS=Arabidopsis thaliana OX=3702 GN=ATJ10 PE=2 SV=2 && PF14308:X-domain of DnaJ-containing|PF00226:DnaJ domain	NAC
Solyc02g064680_3	3417.950934	3579.393862	3692.122248	1636.289088	1790.037692	1449.49484	3563.155681	1625.273874	1.133382071	3.66E-38	2.67E-36	Solyc02g064680_3	2	36322659	36328948	+	4236	protein_coding	NA && sp|O81108|ACA2_ARATH Calcium-transporting ATPase 2, plasma membrane-type OS=Arabidopsis thaliana OX=3702 GN=ACA2 PE=1 SV=1 && PF00689:Cation transporting ATPase, C-terminus|PF00122:E1-E2 ATPase|PF12515:Ca2+-ATPase N terminal autoinhibitory domain|PF13246:Cation transport ATPase (P-type)|PF00690:Cation transporter/ATPase, N-terminus	MYB_related
Solyc04g014500_3	41.5599904	43.29911929	43.24927418	429.5991961	473.7893387	353.613027	42.70279462	419.0005206	-3.293240839	4.34E-38	3.15E-36	Solyc04g014500_3	4	4728790	4733455	-	2202	protein_coding	NA && sp|Q9LQU5|NUD18_ARATH Nudix hydrolase 18, mitochondrial OS=Arabidopsis thaliana OX=3702 GN=NUDT18 PE=2 SV=1 && PF00293:NUDIX domain	ERF
Solyc11g068960_2	253.6592517	314.6402669	278.8440046	931.0426264	952.8346606	1009.230693	282.3811744	964.3693268	-1.772676403	5.20E-38	3.76E-36	Solyc11g068960_2	11	53825602	53833063	+	3826	protein_coding	NA && sp|Q9XIN0|LHW_ARATH Transcription factor LHW OS=Arabidopsis thaliana OX=3702 GN=LHW PE=1 SV=1 && PF14215:bHLH-MYC and R2R3-MYB transcription factors N-terminal	bHLH
Solyc01g010430_3	1762.716834	2189.492132	2046.373552	790.2865758	657.7487492	794.5143147	1999.527506	747.5165466	1.41905676	5.49E-38	3.96E-36	Solyc01g010430_3	1	5283640	5287279	+	1523	protein_coding	NA && - && PF04601:Domain of unknown function (DUF569)	M-type_MADS
Solyc05g056120_3	431.3640383	528.2492554	554.2735927	80.64148732	56.31410524	82.19113601	504.6289621	73.04890952	2.786343223	5.68E-38	4.08E-36	Solyc05g056120_3	5	66360248	66362822	-	1371	protein_coding	NA && sp|Q9SV30|GATA8_ARATH GATA transcription factor 8 OS=Arabidopsis thaliana OX=3702 GN=GATA8 PE=1 SV=1 && PF00320:GATA zinc finger	GATA
Solyc07g017600_3	445.6950694	402.6818094	408.5918271	38.12143037	36.04102735	12.74281178	418.9895687	28.96842317	3.86732853	6.21E-38	4.44E-36	Solyc07g017600_3	7	7612895	7618187	+	2184	protein_coding	NA && sp|Q43062|PME_PRUPE Pectinesterase/pectinesterase inhibitor PPE8B OS=Prunus persica OX=3760 PE=2 SV=1 && PF01095:Pectinesterase|PF04043:Plant invertase/pectin methylesterase inhibitor	Trihelix
Solyc11g005840_2	209.2330551	219.3822044	218.5226485	752.8982498	874.745768	823.8227818	215.712636	817.1555999	-1.92103038	6.34E-38	4.52E-36	Solyc11g005840_2	11	672566	675050	-	2139	protein_coding	NA && - && PF00266:Aminotransferase class-V	NAC
Solyc04g074680_1	766.7101677	598.9711502	664.6730558	156.1512436	144.9149641	158.0108661	676.7847912	153.0256913	2.144164523	8.47E-38	6.02E-36	Solyc04g074680_1	4	60686311	60686808	-	498	protein_coding	NA && - && -	-
Solyc01g081600_3	451.4274819	337.7331305	482.5708487	52.78351898	28.53247999	42.68841948	423.910487	41.33480615	3.357721933	9.40E-38	6.66E-36	Solyc01g081600_3	1	80646780	80647809	-	414	protein_coding	NA && sp|Q9LLR6|NLTP4_ARATH Non-specific lipid-transfer protein 4 OS=Arabidopsis thaliana OX=3702 GN=LTP4 PE=3 SV=1 && PF00234:Protease inhibitor/seed storage/LTP family	ARF
Solyc01g099680_3	2103.795376	1960.0068	2155.634876	943.5054017	992.6299617	963.3565709	2073.145684	966.4973114	1.101596869	2.29E-37	1.62E-35	Solyc01g099680_3	1	89726488	89728376	+	880	protein_coding	NA && sp|Q9SW70|SRP_VITRI Stress-related protein OS=Vitis riparia OX=96939 GN=SRP PE=2 SV=1 && PF05755:Rubber elongation factor protein (REF)	-
Solyc03g113580_2	113.2151463	95.25806244	125.1952674	554.2269492	721.5714018	606.5578409	111.2228254	627.452064	-2.490684139	2.74E-37	1.92E-35	Solyc03g113580_2	3	65148415	65151274	-	1269	protein_coding	NA && sp|Q9LMC9|GLT2_ARATH Germin-like protein subfamily T member 2 OS=Arabidopsis thaliana OX=3702 GN=At1g18980 PE=2 SV=1 && PF00190:Cupin	bZIP
Solyc10g081980_2	782.474302	837.1163063	713.6130239	1964.719873	1932.700092	1746.402355	777.7345441	1881.274107	-1.276069659	3.72E-37	2.61E-35	Solyc10g081980_2	10	63017952	63023487	+	1124	protein_coding	NA && sp|Q9FNH6|NHL3_ARATH NDR1/HIN1-like protein 3 OS=Arabidopsis thaliana OX=3702 GN=NHL3 PE=1 SV=1 && PF03168:Late embryogenesis abundant protein	bZIP
Solyc07g054790_1	4.299309351	2.886607953	4.552555177	545.4296961	355.1542904	437.0784442	3.91282416	445.8874769	-6.81500161	4.11E-37	2.87E-35	Solyc07g054790_1	7	63112730	63113002	-	273	protein_coding	NA && - && -	Nin-like
Solyc06g071810_1	2656.973179	2417.53416	2371.881247	1159.771209	1048.193212	1194.638605	2482.129529	1134.201009	1.128976063	4.26E-37	2.97E-35	Solyc06g071810_1	6	44375481	44377358	+	1878	protein_coding	NA && sp|Q9SKB2|SBIR1_ARATH Leucine-rich repeat receptor-like serine/threonine/tyrosine-protein kinase SOBIR1 OS=Arabidopsis thaliana OX=3702 GN=SOBIR1 PE=1 SV=1 && PF12799:Leucine Rich repeats (2 copies)|PF00069:Protein kinase domain	STAT
Solyc07g008240_3	832.6329111	697.1158206	569.0693971	1930.997069	2112.905229	1978.321529	699.6060429	2007.407942	-1.524116486	4.57E-37	3.17E-35	Solyc07g008240_3	7	2965816	2968253	-	982	protein_coding	NA && sp|Q947C5|HBL1_GOSHI Non-symbiotic hemoglobin 1 OS=Gossypium hirsutum OX=3635 GN=HB1 PE=2 SV=1 && PF00042:Globin	-
Solyc06g074980_3	1549.18447	1284.540539	1542.178066	3080.504816	3229.426222	3498.538975	1458.634358	3269.490004	-1.163686717	6.13E-37	4.24E-35	Solyc06g074980_3	6	46620249	46627336	+	2913	protein_coding	NA && sp|Q96372|CDC48_CAPAN Cell division cycle protein 48 homolog OS=Capsicum annuum OX=4072 GN=CAFP PE=2 SV=1 && PF17862:AAA+ lid domain|PF02933:Cell division protein 48 (CDC48), domain 2|PF00004:ATPase family associated with various cellular activities (AAA)|PF02359:Cell division protein 48 (CDC48), N-terminal domain	FAR1
Solyc07g009100_3	427.0647289	249.6915879	299.3305029	1412.692237	1252.425701	1249.432695	325.3622732	1304.850211	-2.005309877	7.42E-37	5.11E-35	Solyc07g009100_3	7	4044488	4045195	-	544	protein_coding	NA && - && -	-
Solyc12g010040_2	875.6260046	604.7443661	670.3637497	2072.486224	1953.724024	2057.964103	716.9113735	2028.058117	-1.501385088	9.84E-37	6.75E-35	Solyc12g010040_2	12	3180683	3187564	-	2087	protein_coding	NA && sp|Q42876|AMPL2_SOLLC Leucine aminopeptidase 2, chloroplastic OS=Solanum lycopersicum OX=4081 GN=LAPA2 PE=2 SV=1 && PF02789:Cytosol aminopeptidase family, N-terminal domain|PF00883:Cytosol aminopeptidase family, catalytic domain	HSF
Solyc12g094520_2	778.1749926	697.1158206	925.3068396	168.614019	208.7376168	149.7280385	800.1992176	175.6932247	2.190807209	1.55E-36	1.06E-34	Solyc12g094520_2	12	65716200	65720088	-	1902	protein_coding	NA && sp|M4IQR7|CCL5_HUMLU Probable CoA ligase CCL5 OS=Humulus lupulus OX=3486 GN=CCL5 PE=2 SV=1 && PF00501:AMP-binding enzyme|PF13193:AMP-binding enzyme C-terminal domain	NAC
Solyc08g078040_3	609.0688248	508.0429997	674.9163049	90.90494935	103.6179536	128.0652584	597.3427098	107.5293871	2.472227714	2.79E-36	1.90E-34	Solyc08g078040_3	8	62029663	62034745	+	3366	protein_coding	NA && sp|O81816|MO2_ARATH Monooxygenase 2 OS=Arabidopsis thaliana OX=3702 GN=MO2 PE=2 SV=1 && -	-
Solyc08g041860_1	550.311597	464.7438804	490.5378203	1265.338247	1409.35434	1462.874793	501.8644326	1379.189127	-1.459208797	3.32E-36	2.26E-34	Solyc08g041860_1	8	25512336	25512836	+	501	protein_coding	NA && - && PF15365:Proline-rich nuclear receptor coactivator motif	-
Solyc02g068680_1	798.2384363	974.2301841	747.7571877	178.1443765	227.5089852	158.6480067	840.0752694	188.1004561	2.160195634	5.06E-36	3.42E-34	Solyc02g068680_1	2	39192315	39193700	+	1386	protein_coding	NA && - && PF03107:C1 domain	bHLH
Solyc12g057160_1	1600.776182	1744.954507	1887.034121	661.9933005	615.7008839	756.2858794	1744.254937	677.9933546	1.36302252	7.32E-36	4.94E-34	Solyc12g057160_1	12	64174014	64174412	+	399	protein_coding	NA && - && -	-
Solyc05g007930_3	401.2688728	365.155906	388.1053288	54.24972784	27.03077051	33.13131064	384.8433692	38.13726966	3.336762046	8.20E-36	5.51E-34	Solyc05g007930_3	5	2351707	2358388	-	3677	protein_coding	NA && sp|Q8L7F9|B3GTF_ARATH Beta-1,3-galactosyltransferase GALT1 OS=Arabidopsis thaliana OX=3702 GN=GALT1 PE=1 SV=1 && PF00337:Galactoside-binding lectin|PF01762:Galactosyltransferase	FAR1
Solyc10g086630_1	50.1586091	27.42277555	76.25529921	472.1192531	513.5846398	651.1576822	51.27889462	545.620525	-3.390509841	1.07E-35	7.17E-34	Solyc10g086630_1	10	65526847	65527098	+	252	protein_coding	NA && - && -	-
Solyc02g065170_3	470.0578224	535.4657752	619.147504	33.72280379	79.59060207	66.26262128	541.5570339	59.85867571	3.17764431	1.19E-35	7.95E-34	Solyc02g065170_3	2	36900128	36904587	+	2560	protein_coding	NA && sp|Q00624|ASOL_BRANA L-ascorbate oxidase homolog OS=Brassica napus OX=3708 GN=Bp10 PE=2 SV=1 && PF07731:Multicopper oxidase|PF00394:Multicopper oxidase|PF07732:Multicopper oxidase	bHLH
Solyc07g042550_3	2288.665678	2413.204249	2477.728155	5234.365632	4387.99508	4865.205539	2393.199361	4829.18875	-1.012470752	1.61E-35	1.08E-33	Solyc07g042550_3	7	56098858	56104538	-	2995	protein_coding	NA && sp|P49039|SUS2_SOLTU Sucrose synthase OS=Solanum tuberosum OX=4113 PE=3 SV=1 && PF00862:Sucrose synthase|PF00534:Glycosyl transferases group 1	HB-other
Solyc01g073890_3	535.9805658	574.4349826	481.4327099	57.18214556	75.83632839	101.9424943	530.6160861	78.32032274	2.754683877	1.91E-35	1.27E-33	Solyc01g073890_3	1	81096088	81104284	+	3328	protein_coding	NA && - && PF03107:C1 domain	LBD
Solyc04g074950_3	1145.049391	1145.983357	1129.033684	386.3460347	413.7209598	308.3760452	1140.022144	369.4810132	1.627222113	4.72E-35	3.11E-33	Solyc04g074950_3	4	60922802	60926379	+	1149	protein_coding	NA && sp|Q94AC1|STR6_ARATH Rhodanese-like domain-containing protein 6 OS=Arabidopsis thaliana OX=3702 GN=STR6 PE=2 SV=1 && PF03959:Serine hydrolase (FSH1)	-
Solyc02g083730_3	25.79585611	60.61876701	22.76277588	466.2544176	401.707284	464.4754895	36.39246633	444.1457304	-3.629739009	7.25E-35	4.76E-33	Solyc02g083730_3	2	47582654	47584250	-	1261	protein_coding	NA && sp|Q9FKW8|STR18_ARATH Thiosulfate sulfurtransferase 18 OS=Arabidopsis thaliana OX=3702 GN=STR18 PE=1 SV=1 && PF00581:Rhodanese-like domain	-
Solyc05g005680_3	669.2591557	587.4247184	491.6759591	129.0263797	101.3653894	108.3139002	582.7866111	112.9018898	2.366667987	1.08E-34	7.07E-33	Solyc05g005680_3	5	506487	508079	+	968	protein_coding	NA && sp|Q8LC45|XTH33_ARATH Probable xyloglucan endotransglucosylase/hydrolase protein 33 OS=Arabidopsis thaliana OX=3702 GN=XTH33 PE=1 SV=2 && PF06955:Xyloglucan endo-transglycosylase (XET) C-terminus|PF00722:Glycosyl hydrolases family 16	MYB_related
Solyc03g112100_3	465.7585131	689.8993007	496.2285142	1807.10242	1571.538964	1715.182466	550.628776	1697.941283	-1.62673997	1.43E-34	9.28E-33	Solyc03g112100_3	3	64104026	64105237	-	697	protein_coding	NA && sp|Q9SB67|NRT32_ARATH High-affinity nitrate transporter 3.2 OS=Arabidopsis thaliana OX=3702 GN=NRT3.2 PE=2 SV=1 && PF16974:High-affinity nitrate transporter accessory	-
Solyc09g064630_3	325.3144076	336.2898265	357.3755814	38.12143037	41.29701051	48.42268478	339.6599385	42.61370855	2.992133574	1.54E-34	1.00E-32	Solyc09g064630_3	9	62182566	62184543	+	1342	protein_coding	NA && - && -	-
Solyc01g010080_3	190.6027146	155.8768295	216.2463709	778.5569049	716.3154186	792.602893	187.575305	762.4917388	-2.018053798	1.69E-34	1.09E-32	Solyc01g010080_3	1	4736565	4747053	+	2136	protein_coding	NA && sp|P92960|KAT3_ARATH Potassium channel KAT3 OS=Arabidopsis thaliana OX=3702 GN=KAT3 PE=1 SV=1 && PF11834:KHA, dimerisation domain of potassium ion channel|PF00520:Ion transport protein|PF00027:Cyclic nucleotide-binding domain	bZIP
Solyc04g081530_1	310.9833764	432.9911929	282.2584209	14.6620886	34.53931788	17.8399365	342.0776634	22.34711433	3.942007888	2.34E-34	1.51E-32	Solyc04g081530_1	4	65562982	65563449	+	468	protein_coding	NA && sp|Q9FYB5|DNJ11_ARATH Chaperone protein dnaJ 11, chloroplastic OS=Arabidopsis thaliana OX=3702 GN=ATJ11 PE=1 SV=2 && PF00226:DnaJ domain	bHLH
Solyc03g006620_3	366.874398	440.2077128	413.1443823	42.52005695	63.07179787	32.49417005	406.7421644	46.02867496	3.15046112	2.44E-34	1.57E-32	Solyc03g006620_3	3	1197391	1199002	+	1340	protein_coding	NA && - && PF05553:Cotton fibre expressed protein|PF14364:Domain of unknown function (DUF4408)	-
Solyc04g071085_1	1933.256105	1762.274155	1687.859832	3444.857718	4206.288234	3901.211828	1794.463364	3850.785926	-1.102354375	2.95E-34	1.89E-32	Solyc04g071085_1	4	58101640	58102845	+	474	protein_coding	NA && - && PF04554:Extensin-like region	-
Solyc08g078080_3	815.4356737	909.2815051	1042.535135	189.8740474	220.7512925	277.1561563	922.4174381	229.2604988	2.007362416	3.30E-34	2.11E-32	Solyc08g078080_3	8	62042685	62050532	-	3324	protein_coding	NA && sp|O23522|PLA14_ARATH Phospholipase A1-Ibeta2, chloroplastic OS=Arabidopsis thaliana OX=3702 GN=At4g16820 PE=1 SV=2 && PF01764:Lipase (class 3)|PF13041:PPR repeat family|PF14432:DYW family of nucleic acid deaminases|PF01535:PPR repeat	bHLH
Solyc07g066360_1	576.1074531	577.3215906	404.0392719	79.17527846	42.79871998	73.90830835	519.1561052	65.29410226	2.986648197	3.89E-34	2.47E-32	Solyc07g066360_1	7	67957610	67957855	-	246	protein_coding	NA && - && -	-
Solyc05g052050_1	624.8329591	777.9408433	797.8352947	168.614019	114.8807747	89.19968249	733.5363657	124.231492	2.565363166	4.72E-34	3.00E-32	Solyc05g052050_1	5	63247063	63247767	+	705	protein_coding	NA && sp|Q40476|ERF1_TOBAC Ethylene-responsive transcription factor 1 OS=Nicotiana tabacum OX=4097 GN=ERF1 PE=2 SV=1 && PF00847:AP2 domain	ERF
Solyc06g073580_3	229.2964987	373.8157299	225.3514812	16.12829746	6.006837892	5.097124714	276.15457	9.077420023	4.938807979	5.07E-34	3.21E-32	Solyc06g073580_3	6	45509086	45512035	+	1471	protein_coding	NA && sp|P24397|HY6H_HYONI Hyoscyamine 6-dioxygenase OS=Hyoscyamus niger OX=4079 GN=H6H PE=1 SV=1 && PF03171:2OG-Fe(II) oxygenase superfamily|PF14226:non-haem dioxygenase in morphine synthesis N-terminal	STAT
Solyc04g048900_3	954.446676	935.2609767	1115.376018	170.8133322	207.2359073	294.9960928	1001.694557	224.3484441	2.156517828	9.16E-34	5.77E-32	Solyc04g048900_3	4	38504741	38508764	+	2078	protein_coding	NA && sp|O04153|CALR3_ARATH Calreticulin-3 OS=Arabidopsis thaliana OX=3702 GN=CRT3 PE=1 SV=2 && PF00262:Calreticulin family	ERF
Solyc05g053960_3	1822.907165	1596.294198	1602.499422	479.4502974	690.0355029	542.843782	1673.900262	570.7765274	1.55250093	1.00E-33	6.30E-32	Solyc05g053960_3	5	64817900	64819768	-	994	protein_coding	NA && - && -	-
Solyc02g089920_2	1388.676921	1462.066928	1443.159991	558.6255758	627.7145597	502.0667843	1431.30128	562.8023066	1.347882069	1.21E-33	7.57E-32	Solyc02g089920_2	2	52221759	52227210	+	3648	protein_coding	NA && sp|O64825|LYK4_ARATH LysM domain receptor-like kinase 4 OS=Arabidopsis thaliana OX=3702 GN=LYK4 PE=1 SV=1 && PF00069:Protein kinase domain|PF07714:Protein tyrosine kinase	WRKY
Solyc02g090400_3	759.5446521	724.5385962	602.0754221	90.90494935	164.4371873	107.039619	695.3862235	120.7939185	2.526389508	1.56E-33	9.71E-32	Solyc02g090400_3	2	52601857	52604266	+	1433	protein_coding	NA && sp|Q5VRW2|NOH1_ORYSJ Transcription factor NIGTH1 OS=Oryza sativa subsp. japonica OX=39947 GN=NHO1 PE=1 SV=2 && PF00249:Myb-like DNA-binding domain	G2-like
Solyc04g077470_3	1284.060393	1114.23067	1538.76365	461.855791	409.9666861	438.3527254	1312.351571	436.7250675	1.58881328	1.79E-33	1.11E-31	Solyc04g077470_3	4	62470433	62474280	+	3441	protein_coding	NA && sp|Q9ZQB9|CSLCC_ARATH Probable xyloglucan glycosyltransferase 12 OS=Arabidopsis thaliana OX=3702 GN=CSLC12 PE=1 SV=1 && PF13641:Glycosyltransferase like family 2	MYB_related
Solyc06g076850_3	1341.384518	1096.911022	1166.592264	405.4067499	401.707284	464.4754895	1201.629268	423.8631745	1.502029832	2.05E-33	1.27E-31	Solyc06g076850_3	6	47883520	47887018	-	2676	protein_coding	NA && - && PF14559:Tetratricopeptide repeat	-
Solyc06g030470_3	1282.62729	1096.911022	1213.255955	456.72406	335.6320672	358.0730111	1197.598089	383.4763795	1.643461099	3.11E-33	1.91E-31	Solyc06g030470_3	6	18831406	18833893	-	1972	protein_coding	NA && sp|Q8GYT8|SOK3_ARATH Protein SOSEKI 3 OS=Arabidopsis thaliana OX=3702 GN=SOK3 PE=1 SV=1 && PF06136:Domain of unknown function (DUF966)	C2H2
Solyc03g098740_1	71.65515586	17.31964772	54.63066212	2554.135835	2645.261237	2654.327695	47.86848856	2617.908255	-5.770504471	3.91E-33	2.40E-31	Solyc03g098740_1	3	62445759	62446358	-	600	protein_coding	NA && sp|P24924|ITRY_ACACO Trypsin inhibitor OS=Acacia confusa OX=3809 GN=ACTI PE=1 SV=2 && PF00197:Trypsin and protease inhibitor	-
Solyc01g103590_3	1325.620383	1636.706709	1576.32223	565.2235157	627.7145597	604.6464191	1512.883108	599.1948315	1.336619088	4.15E-33	2.53E-31	Solyc01g103590_3	1	92047496	92048349	+	686	protein_coding	NA && - && PF00903:Glyoxalase/Bleomycin resistance protein/Dioxygenase superfamily	NAC
Solyc01g006240_3	200.6344364	246.80498	229.9040364	13.19587974	12.01367578	6.371405892	225.7811509	10.52698714	4.437734231	4.16E-33	2.54E-31	Solyc01g006240_3	1	859861	860918	-	702	protein_coding	NA && sp|P18670|LECA_ARTIN Agglutinin alpha chain OS=Artocarpus integer OX=3490 PE=1 SV=2 && PF01419:Jacalin-like lectin domain	-
Solyc07g007600_3	1063.362513	1323.509746	1138.138794	2464.697094	2555.909523	2582.330808	1175.003684	2534.312475	-1.109641992	5.04E-33	3.06E-31	Solyc07g007600_3	7	2247186	2251921	-	2767	protein_coding	NA && sp|P21616|AVP_VIGRR Pyrophosphate-energized vacuolar membrane proton pump OS=Vigna radiata var. radiata OX=3916 PE=1 SV=4 && PF03030:Inorganic H+ pyrophosphatase	B3
Solyc03g025950_3	908.5873763	954.0239284	908.2347577	2076.151746	1844.850088	1970.038702	923.6153541	1963.680179	-1.088680742	9.02E-33	5.46E-31	Solyc03g025950_3	3	3409927	3412727	+	996	protein_coding	NA && sp|Q9M2Z4|MSBP2_ARATH Membrane steroid-binding protein 2 OS=Arabidopsis thaliana OX=3702 GN=MSBP2 PE=1 SV=1 && PF00173:Cytochrome b5-like Heme/Steroid binding domain	-
Solyc10g086690_2	338.2123357	206.3924686	264.0482002	19.06071519	20.27307789	12.74281178	269.5510015	17.35886829	3.964992148	1.09E-32	6.60E-31	Solyc10g086690_2	10	65581571	65584923	+	1413	protein_coding	NA && sp|Q9M325|IPCS1_ARATH Phosphatidylinositol:ceramide inositolphosphotransferase 1 OS=Arabidopsis thaliana OX=3702 GN=IPCS1 PE=2 SV=1 && PF14360:PAP2 superfamily C-terminal	-
Solyc12g099120_2	656.3612277	635.0537496	522.4057065	137.0905285	152.4235115	144.6309137	604.6068946	144.7149846	2.061329298	2.03E-32	1.22E-30	Solyc12g099120_2	12	67372351	67385958	+	1594	protein_coding	NA && sp|Q9FGY3|MYB78_ARATH Transcription factor MYB78 OS=Arabidopsis thaliana OX=3702 GN=MYB78 PE=1 SV=1 && PF00249:Myb-like DNA-binding domain	MYB
Solyc04g054810_3	2655.540076	2482.482839	2882.905566	1255.807889	893.5171365	953.1623214	2673.642827	1034.162449	1.37103984	2.11E-32	1.26E-30	Solyc04g054810_3	4	53225283	53226363	+	644	protein_coding	NA && sp|P33050|PSC13_MAIZE Pollen-specific protein C13 OS=Zea mays OX=4577 GN=MGS1 PE=2 SV=1 && PF01190:Pollen proteins Ole e I like	EIL
Solyc01g107170_2	1863.034052	1710.315212	1612.742671	691.3174777	790.6500375	626.9463398	1728.697312	702.971285	1.298487272	2.77E-32	1.66E-30	Solyc01g107170_2	1	94682307	94683605	+	1299	protein_coding	NA && sp|Q96289|ZAT10_ARATH Zinc finger protein ZAT10 OS=Arabidopsis thaliana OX=3702 GN=ZAT10 PE=2 SV=1 && PF13912:C2H2-type zinc finger	C2H2
Solyc09g015830_2	2116.693304	2284.750195	2399.196578	1084.994557	1081.981675	1167.241559	2266.880026	1111.40593	1.028576026	3.53E-32	2.10E-30	Solyc09g015830_2	9	11274996	11278321	-	2029	protein_coding	NA && sp|Q9SCZ4|FERON_ARATH Receptor-like protein kinase FERONIA OS=Arabidopsis thaliana OX=3702 GN=FER PE=1 SV=1 && PF07714:Protein tyrosine kinase	B3
Solyc01g095140_3	1658.100307	2033.615303	1768.667686	47.65178796	105.1196631	43.32556006	1820.127765	65.36567038	4.801900396	4.19E-32	2.49E-30	Solyc01g095140_3	1	86397518	86398199	+	590	protein_coding	NA && sp|P46519|LEA14_SOYBN Desiccation protectant protein Lea14 homolog OS=Glycine max OX=3847 PE=2 SV=1 && PF03168:Late embryogenesis abundant protein	NAC
Solyc11g063500_1	1473.230004	2160.626053	1238.295008	404.6736455	372.4239493	480.4040042	1624.050355	419.1671997	1.951962212	5.26E-32	3.11E-30	Solyc11g063500_1	11	49914528	49914698	+	171	protein_coding	NA && - && -	-
Solyc03g111310_3	352.5433668	355.0527782	289.0872537	1052.004857	969.3534648	965.9051332	332.2277996	995.7544851	-1.58742641	6.03E-32	3.54E-30	Solyc03g111310_3	3	63409700	63414490	+	1735	protein_coding	NA && sp|Q8LBB2|KING1_ARATH SNF1-related protein kinase regulatory subunit gamma-1 OS=Arabidopsis thaliana OX=3702 GN=KING1 PE=1 SV=2 && PF00571:CBS domain	WRKY
Solyc08g079170_3	1259.69764	1632.376797	1622.98592	3732.967759	3359.324091	3222.01996	1505.020119	3438.103936	-1.190793674	7.90E-32	4.61E-30	Solyc08g079170_3	8	62925819	62932095	+	3280	protein_coding	NA && sp|Q5XEP2|HSOP2_ARATH Hsp70-Hsp90 organizing protein 2 OS=Arabidopsis thaliana OX=3702 GN=HOP2 PE=1 SV=1 && PF13414:TPR repeat|PF00515:Tetratricopeptide repeat|PF17830:STI1 domain	C3H
Solyc04g074290_3	1292.659012	1193.612388	1218.946649	404.6736455	385.1884798	510.3496119	1235.072683	433.4039124	1.508956487	8.78E-32	5.12E-30	Solyc04g074290_3	4	60362352	60369310	-	2892	protein_coding	NA && sp|Q9C9Q8|PMTT_ARATH Probable pectin methyltransferase QUA2 OS=Arabidopsis thaliana OX=3702 GN=QUA2 PE=1 SV=2 && PF03141:Putative S-adenosyl-L-methionine-dependent methyltransferase	NAC
Solyc04g079470_3	1047.598379	1055.055207	1009.52911	403.9405411	316.1098441	307.101764	1037.394232	342.3840497	1.599864042	1.22E-31	7.11E-30	Solyc04g079470_3	4	64032976	64039022	-	2922	protein_coding	NA && sp|Q9S7T8|SPZX_ARATH Serpin-ZX OS=Arabidopsis thaliana OX=3702 GN=At1g47710 PE=1 SV=1 && PF00079:Serpin (serine protease inhibitor)	B3
Solyc04g079360_1	573.2412469	645.1568775	489.3996815	110.698769	128.3961599	82.19113601	569.2659353	107.095355	2.4125078	1.57E-31	9.09E-30	Solyc04g079360_1	4	63974716	63975474	+	759	protein_coding	NA && sp|Q9SN12|MYB77_ARATH Transcription factor MYB77 OS=Arabidopsis thaliana OX=3702 GN=MYB77 PE=1 SV=1 && PF13921:Myb-like DNA-binding domain	MYB
Solyc11g010600_2	836.9322204	1040.622167	1043.673274	321.0997404	313.8572799	253.5819545	973.7425539	296.1796583	1.719236887	2.62E-31	1.51E-29	Solyc11g010600_2	11	3663014	3668741	+	1956	protein_coding	NA && sp|Q0WUZ5|OFT39_ARATH O-fucosyltransferase 39 OS=Arabidopsis thaliana OX=3702 GN=OFUT39 PE=2 SV=1 && PF10250:GDP-fucose protein O-fucosyltransferase	MIKC_MADS
Solyc11g045150_1	997.4397695	1203.715516	841.0845689	310.8362784	290.580783	316.0217322	1014.079952	305.8129312	1.72743373	2.65E-31	1.53E-29	Solyc11g045150_1	11	31816637	31816915	-	279	protein_coding	NA && sp|P93276|M030_ARATH Uncharacterized mitochondrial protein AtMg00030 OS=Arabidopsis thaliana OX=3702 GN=AtMg00030 PE=4 SV=1 && -	-
Solyc01g103050_3	1079.126647	1330.726266	1337.313083	414.2040031	495.5641261	412.2299612	1249.055332	440.6660301	1.504490633	2.73E-31	1.57E-29	Solyc01g103050_3	1	91610827	91618031	+	4045	protein_coding	NA && sp|Q8L7G0|ARFA_ARATH Auxin response factor 1 OS=Arabidopsis thaliana OX=3702 GN=ARF1 PE=1 SV=2 && PF02309:AUX/IAA family|PF06507:Auxin response factor|PF02362:B3 DNA binding domain	ARF
Solyc07g054770_1	8.598618703	20.20625567	4.552555177	315.9680094	258.2940294	283.5275622	11.11914318	285.929867	-4.732565775	4.13E-31	2.36E-29	Solyc07g054770_1	7	63109341	63109610	-	270	protein_coding	NA && - && -	Nin-like
Solyc01g099370_3	2017.809189	1988.872879	1765.25327	791.0196802	786.8957639	940.4195096	1923.978446	839.4449846	1.194830035	5.82E-31	3.32E-29	Solyc01g099370_3	1	89536647	89537483	+	837	protein_coding	NA && sp|O04023|SRC2_ARATH Protein SRC2 homolog OS=Arabidopsis thaliana OX=3702 GN=SRC2 PE=1 SV=1 && PF00168:C2 domain	-
Solyc07g054830_3	812.5694674	832.7863944	704.5079136	244.8568797	168.191461	176.4879432	783.2879251	196.5120946	1.994815011	5.95E-31	3.38E-29	Solyc07g054830_3	7	63121775	63138309	-	3146	protein_coding	NA && sp|Q9C5E5|DGK5_ARATH Diacylglycerol kinase 5 OS=Arabidopsis thaliana OX=3702 GN=DGK5 PE=2 SV=1 && PF00781:Diacylglycerol kinase catalytic domain|PF00609:Diacylglycerol kinase accessory domain	-
Solyc08g075370_3	1706.825813	1690.108956	1795.983017	831.3404239	861.9812375	771.5772535	1730.972595	821.6329716	1.076156995	6.69E-31	3.79E-29	Solyc08g075370_3	8	59628875	59631494	-	1024	protein_coding	NA && - && -	-
Solyc06g066800_2	980.2425321	985.7766159	937.8263664	295.4410854	199.7273599	156.0994444	967.9485048	217.0892965	2.158642066	6.73E-31	3.80E-29	Solyc06g066800_2	6	42103894	42105331	+	1340	protein_coding	NA && sp|Q9XIP8|CDI_ARATH Protein CDI OS=Arabidopsis thaliana OX=3702 GN=CDI PE=2 SV=1 && -	C2H2
Solyc10g006540_3	1444.567942	1098.354326	1357.799581	361.4204841	491.8098524	414.141383	1300.240617	422.4572398	1.622664692	8.72E-31	4.91E-29	Solyc10g006540_3	10	1095309	1102401	+	3988	protein_coding	NA && sp|Q94B77|FH5_ARATH Formin-like protein 5 OS=Arabidopsis thaliana OX=3702 GN=FH5 PE=2 SV=2 && PF02181:Formin Homology 2 Domain	M-type_MADS
Solyc02g068430_3	1299.824527	1346.60261	1025.463054	331.3632025	326.6218104	446.635553	1223.963397	368.2068553	1.729988123	1.08E-30	6.04E-29	Solyc02g068430_3	2	38947778	38956749	-	1347	protein_coding	NA && sp|F4JJE0|CCT2_ARATH Choline-phosphate cytidylyltransferase 2 OS=Arabidopsis thaliana OX=3702 GN=CCT2 PE=1 SV=1 && PF01467:Cytidylyltransferase-like	FAR1
Solyc08g007080_3	385.5047385	241.0317641	342.579777	35.92211708	27.03077051	16.56565532	323.0387599	26.50618097	3.616034593	1.20E-30	6.71E-29	Solyc08g007080_3	8	1636652	1642794	-	3448	protein_coding	NA && sp|Q9FUR2|IP5P2_ARATH Type I inositol polyphosphate 5-phosphatase 2 OS=Arabidopsis thaliana OX=3702 GN=IP5P2 PE=1 SV=2 && PF03372:Endonuclease/Exonuclease/phosphatase family	M-type_MADS
Solyc10g049580_2	414.1668009	571.5483747	369.8951081	79.90838289	59.31752418	68.81118363	451.8700945	69.3456969	2.702083817	1.34E-30	7.50E-29	Solyc10g049580_2	10	46082039	46084089	-	922	protein_coding	NA && - && -	-
Solyc03g007470_3	1451.733458	1414.437897	1462.50835	338.6942468	547.3731029	482.315426	1442.893235	456.1275919	1.66141159	1.65E-30	9.18E-29	Solyc03g007470_3	3	2043689	2047569	-	770	protein_coding	NA && sp|P35132|UBC9_ARATH SUMO-conjugating enzyme UBC9 OS=Arabidopsis thaliana OX=3702 GN=UBC9 PE=1 SV=1 && PF00179:Ubiquitin-conjugating enzyme	MYB_related
Solyc10g007600_3	1486.127932	1132.993621	1388.529329	442.0619714	507.5778019	514.8095961	1335.883628	488.1497898	1.452435455	1.86E-30	1.03E-28	Solyc10g007600_3	10	1887487	1891843	-	1514	protein_coding	NA && sp|Q9LRR9|GLO1_ARATH (S)-2-hydroxy-acid oxidase GLO1 OS=Arabidopsis thaliana OX=3702 GN=GLO1 PE=1 SV=1 && PF01070:FMN-dependent dehydrogenase	G2-like
Solyc08g014280_3	743.7805178	697.1158206	818.321793	193.5395696	188.4645389	116.5967278	753.0727105	166.2002788	2.183849346	2.25E-30	1.25E-28	Solyc08g014280_3	8	4057978	4065750	+	1884	protein_coding	NA && sp|Q9M199|IQD13_ARATH Protein IQ-DOMAIN 13 OS=Arabidopsis thaliana OX=3702 GN=IQD13 PE=1 SV=1 && PF00612:IQ calmodulin-binding motif|PF13178:Protein of unknown function (DUF4005)	TCP
Solyc07g064620_2	1946.154033	2035.058607	2053.202385	940.572984	837.9538859	672.1833216	2011.471675	816.9033972	1.301262309	3.52E-30	1.94E-28	Solyc07g064620_2	7	66816203	66817776	-	588	protein_coding	NA && sp|P56330|SUI1_MAIZE Protein translation factor SUI1 homolog OS=Zea mays OX=4577 GN=TIF PE=3 SV=1 && PF01253:Translation initiation factor SUI1	MYB_related
Solyc09g098310_3	1074.827338	1135.880229	1247.400118	450.8592246	433.9940377	482.9525666	1152.702562	455.9352763	1.338487597	3.91E-30	2.16E-28	Solyc09g098310_3	9	72672301	72674470	+	926	protein_coding	NA && - && -	-
Solyc02g089620_3	2409.04634	2543.101606	2247.824118	179.6105854	168.9423157	77.73115188	2399.990688	142.0946843	4.079735667	5.91E-30	3.24E-28	Solyc02g089620_3	2	52013726	52015927	-	1940	protein_coding	NA && sp|Q6NKX1|PROD2_ARATH Proline dehydrogenase 2, mitochondrial OS=Arabidopsis thaliana OX=3702 GN=POX2 PE=2 SV=1 && PF01619:Proline dehydrogenase	-
Solyc01g108860_3	947.2811604	593.1979343	661.2586394	172.2795411	150.1709473	169.4793967	733.912578	163.9766284	2.1608864	6.52E-30	3.57E-28	Solyc01g108860_3	1	95923625	95925109	-	1236	protein_coding	NA && sp|Q9FFF6|JOX2_ARATH Jasmonate-induced oxygenase 2 OS=Arabidopsis thaliana OX=3702 GN=JOX2 PE=1 SV=1 && PF03171:2OG-Fe(II) oxygenase superfamily|PF14226:non-haem dioxygenase in morphine synthesis N-terminal	Dof
Solyc01g080010_2	151.9089304	223.7121163	104.7087691	1919.267398	1958.229153	1762.33087	160.1099386	1879.942474	-3.557838466	7.67E-30	4.19E-28	Solyc01g080010_2	1	78993764	78995300	-	1537	protein_coding	NA && sp|P0DO21|GIP2_NICBE Probable aspartic proteinase GIP2 OS=Nicotiana benthamiana OX=4100 GN=GIP2 PE=1 SV=1 && PF14541:Xylanase inhibitor C-terminal|PF14543:Xylanase inhibitor N-terminal	FAR1
Solyc01g098910_3	1305.55694	1742.0679	1250.814535	505.1089524	535.3594271	465.1126301	1432.813125	501.8603366	1.513034893	9.39E-30	5.12E-28	Solyc01g098910_3	1	89152887	89157371	-	1673	protein_coding	NA && sp|B6ZJZ9|PNC1_SOYBN Peroxisomal adenine nucleotide carrier 1 OS=Glycine max OX=3847 GN=PNC1 PE=2 SV=1 && PF00153:Mitochondrial carrier protein	Dof
Solyc12g007110_2	712.2522492	847.2194342	957.1747259	247.056193	229.0106946	270.1476098	838.8821364	248.7381658	1.754226661	1.05E-29	5.69E-28	Solyc12g007110_2	12	1549549	1559999	+	3009	protein_coding	NA && sp|Q9LV48|PERK1_ARATH Proline-rich receptor-like protein kinase PERK1 OS=Arabidopsis thaliana OX=3702 GN=PERK1 PE=1 SV=1 && PF10502:Signal peptidase, peptidase S26|PF07714:Protein tyrosine kinase	GRAS
Solyc04g079640_3	177.7047865	127.0107499	180.9640683	651.7298385	753.8581555	625.6720586	161.8932016	677.0866842	-2.059924065	1.20E-29	6.52E-28	Solyc04g079640_3	4	64118215	64124690	+	3439	protein_coding	NA && sp|O49858|C82A3_SOYBN Cytochrome P450 82A3 OS=Glycine max OX=3847 GN=CYP82A3 PE=2 SV=1 && PF00067:Cytochrome P450	G2-like
Solyc04g057830_1	1066.228719	998.7663517	726.1325507	36.65522151	12.76453052	35.67987299	930.3758738	28.36654168	5.031512911	1.32E-29	7.16E-28	Solyc04g057830_1	4	54877661	54878281	+	621	protein_coding	NA && - && PF14009:Domain of unknown function (DUF4228)	SRS
Solyc04g007030_3	848.3970454	610.517582	564.5168419	1718.396784	1940.959494	2034.389901	674.4771564	1897.915393	-1.495248414	1.50E-29	8.09E-28	Solyc04g007030_3	4	742397	747898	-	3640	protein_coding	NA && sp|Q6L3N7|R1C3_SOLDE Putative late blight resistance protein homolog R1C-3 OS=Solanum demissum OX=50514 GN=R1C-3 PE=3 SV=1 && PF18052:Rx N-terminal domain|PF00931:NB-ARC domain	bHLH
novel.725	386.9378416	359.3826901	284.5346985	24.92555063	36.04102735	50.33410655	343.6184101	37.10022818	3.202982772	2.10E-29	1.13E-27	-	4	4174535	4176859	-	1427	-	- && - && -	-
Solyc02g078670_3	1236.76799	1069.488247	1269.024755	504.375848	424.9837809	421.78707	1191.760331	450.382233	1.405095846	2.30E-29	1.23E-27	Solyc02g078670_3	2	43898345	43903546	-	3427	protein_coding	NA && sp|O80386|CIP7_ARATH COP1-interacting protein 7 OS=Arabidopsis thaliana OX=3702 GN=CIP7 PE=1 SV=1 && -	-
Solyc12g057140_1	1693.927884	1731.964772	1710.622608	807.1479777	762.1175576	881.1654348	1712.171755	816.8103234	1.066944573	2.33E-29	1.24E-27	Solyc12g057140_1	12	64169457	64169867	+	411	protein_coding	NA && - && -	-
Solyc08g065940_3	100.3172182	85.15493461	68.28832765	425.2005695	461.0248082	538.3837979	84.58682682	474.8697252	-2.497346788	2.64E-29	1.41E-27	Solyc08g065940_3	8	54359527	54360489	-	963	protein_coding	NA && sp|O82199|C3H20_ARATH Zinc finger CCCH domain-containing protein 20 OS=Arabidopsis thaliana OX=3702 GN=At2g19810 PE=2 SV=1 && -	C3H
Solyc06g068450_2	63.05653716	23.09286362	34.14416382	363.6197974	409.9666861	388.6557594	40.09785487	387.414081	-3.278693423	3.25E-29	1.73E-27	Solyc06g068450_2	6	42534650	42536002	-	1353	protein_coding	NA && sp|Q8W1D5|CIPKP_ARATH CBL-interacting serine/threonine-protein kinase 25 OS=Arabidopsis thaliana OX=3702 GN=CIPK25 PE=2 SV=1 && PF03822:NAF domain|PF00069:Protein kinase domain	YABBY
Solyc01g104775_1	471.4909255	528.2492554	676.0544437	1478.671636	1458.159898	1563.543006	558.5982082	1500.124847	-1.421002127	3.89E-29	2.06E-27	Solyc01g104775_1	1	93031546	93034082	-	1380	protein_coding	NA && sp|P30173|ACT13_SOLTU Actin-101 OS=Solanum tuberosum OX=4113 GN=AC101 PE=3 SV=1 && PF00022:Actin	Trihelix
Solyc01g079610_3	389.8040479	476.2903122	374.4476633	75.50975631	38.29359156	40.77699771	413.5140078	51.52678186	3.006402361	3.93E-29	2.08E-27	Solyc01g079610_3	1	78573033	78579326	-	1896	protein_coding	NA && sp|Q9LZK5|DNJ19_ARATH DnaJ protein ERDJ3B OS=Arabidopsis thaliana OX=3702 GN=ERDJ3B PE=1 SV=1 && PF00226:DnaJ domain|PF01556:DnaJ C terminal domain	MYB
Solyc09g074250_3	318.148892	317.5268748	292.5016701	10.26346202	33.03760841	8.919968249	309.392479	17.40701289	4.166333892	5.62E-29	2.97E-27	Solyc09g074250_3	9	66451550	66456133	+	2089	protein_coding	NA && sp|Q8RXC8|RBK2_ARATH Receptor-like cytosolic serine/threonine-protein kinase RBK2 OS=Arabidopsis thaliana OX=3702 GN=RBK2 PE=1 SV=1 && PF07714:Protein tyrosine kinase	bZIP
Solyc08g080630_3	339.6454388	437.3211049	493.9522367	1232.348547	1182.59621	1214.389963	423.6395934	1209.77824	-1.509988794	5.74E-29	3.02E-27	Solyc08g080630_3	8	64000788	64002067	-	697	protein_coding	NA && sp|P20076|IER1_SOLLC Ethylene-responsive proteinase inhibitor 1 OS=Solanum lycopersicum OX=4081 PE=3 SV=1 && PF00280:Potato inhibitor I family	-
Solyc02g089140_2	0	2.886607953	6.828832765	304.2383385	296.5876209	294.3589522	3.238480239	298.3949706	-6.417244055	6.46E-29	3.39E-27	Solyc02g089140_2	2	51654471	51655126	+	447	nontranslating_CDS	NA && - && -	-
Solyc06g063210_3	613.3681341	529.6925593	864.9854835	160.5498702	121.6384673	118.5081496	669.3487257	133.5654957	2.328367734	7.20E-29	3.77E-27	Solyc06g063210_3	6	40035721	40046275	+	5982	protein_coding	NA && sp|Q9C5V5|GLR28_ARATH Glutamate receptor 2.8 OS=Arabidopsis thaliana OX=3702 GN=GLR2.8 PE=2 SV=2 && PF01094:Receptor family ligand binding region|PF00497:Bacterial extracellular solute-binding proteins, family 3|PF00060:Ligand-gated ion channel	Nin-like
Solyc11g042560_1	206.3668489	196.2893408	188.9310398	5.864835442	0	1.274281178	197.1957432	2.37970554	6.38859931	8.99E-29	4.69E-27	Solyc11g042560_1	11	36293543	36294064	+	522	protein_coding	NA && sp|Q9LQ28|ERF22_ARATH Ethylene-responsive transcription factor ERF022 OS=Arabidopsis thaliana OX=3702 GN=ERF022 PE=2 SV=1 && PF00847:AP2 domain	ERF
Solyc12g009880_1	15.76413429	8.659823858	4.552555177	247.7892974	310.1030062	218.5392221	9.658837775	258.8105086	-4.785086335	1.21E-28	6.32E-27	Solyc12g009880_1	12	3055601	3056095	-	495	protein_coding	NA && - && -	bHLH
Solyc03g083480_3	720.8508679	702.8890365	899.1296474	222.1306424	207.2359073	251.0333921	774.2898506	226.7999806	1.771848431	1.31E-28	6.81E-27	Solyc03g083480_3	3	54789573	54790840	+	1174	protein_coding	NA && - && PF13947:Wall-associated receptor kinase galacturonan-binding	-
Solyc12g045030_2	752.3791365	881.8587296	887.7482594	2035.097898	1715.703073	1875.741895	840.6620418	1875.514289	-1.156644639	1.78E-28	9.22E-27	Solyc12g045030_2	12	61357135	61358515	+	1188	protein_coding	NA && sp|Q21929|DCXR_CAEEL L-xylulose reductase OS=Caenorhabditis elegans OX=6239 GN=dhs-21 PE=1 SV=2 && PF00106:short chain dehydrogenase	NAC
Solyc04g079125_1	204.9337458	297.3206191	269.7388942	22.72623734	16.5188042	7.008546481	257.3310864	15.41786267	4.075876237	2.39E-28	1.23E-26	Solyc04g079125_1	4	63801780	63804337	-	1034	protein_coding	NA && sp|Q9FMZ4|Y5270_ARATH B3 domain-containing protein At5g42700 OS=Arabidopsis thaliana OX=3702 GN=At5g42700 PE=2 SV=2 && PF02362:B3 DNA binding domain	B3
Solyc10g076510_2	246.4937362	196.2893408	224.2133424	712.5775062	708.0560165	788.7800494	222.3321398	736.4711907	-1.727841143	2.71E-28	1.40E-26	Solyc10g076510_2	10	59602959	59606619	-	2318	protein_coding	NA && sp|O82647|PDC1_ARATH Pyruvate decarboxylase 1 OS=Arabidopsis thaliana OX=3702 GN=PDC1 PE=2 SV=1 && PF02776:Thiamine pyrophosphate enzyme, N-terminal TPP binding domain|PF00205:Thiamine pyrophosphate enzyme, central domain|PF02775:Thiamine pyrophosphate enzyme, C-terminal TPP binding domain	NF-YC
Solyc07g044840_3	898.5556545	838.5596103	838.8082913	1651.684281	1868.126584	1832.416335	858.6411853	1784.075733	-1.055649737	3.43E-28	1.76E-26	Solyc07g044840_3	7	58021006	58026768	+	2218	protein_coding	NA && sp|P35494|PMGI_TOBAC 2,3-bisphosphoglycerate-independent phosphoglycerate mutase OS=Nicotiana tabacum OX=4097 PE=2 SV=1 && PF01676:Metalloenzyme superfamily|PF06415:BPG-independent PGAM N-terminus (iPGM_N)	MYB
Solyc09g090700_1	336.7792325	278.5576674	341.4416382	953.0357593	855.9743996	967.1794144	318.9261794	925.3965244	-1.534938678	3.83E-28	1.96E-26	Solyc09g090700_1	9	70618770	70620338	-	1569	protein_coding	NA && sp|Q9SAK4|SSDH_ARATH Succinate-semialdehyde dehydrogenase, mitochondrial OS=Arabidopsis thaliana OX=3702 GN=ALDH5F1 PE=1 SV=2 && PF00171:Aldehyde dehydrogenase family	bHLH
Solyc06g074990_2	290.9199328	132.7839658	234.4565916	925.1777909	1150.309456	963.3565709	219.3868301	1012.947939	-2.20519441	4.31E-28	2.20E-26	Solyc06g074990_2	6	46631149	46633554	-	2175	protein_coding	NA && sp|Q9FJH8|NRT24_ARATH High affinity nitrate transporter 2.4 OS=Arabidopsis thaliana OX=3702 GN=NRT2.4 PE=2 SV=1 && PF07690:Major Facilitator Superfamily	-
Solyc02g079010_3	378.3392229	297.3206191	351.6848874	22.72623734	51.80897682	22.93706121	342.4482432	32.49075846	3.405432656	4.39E-28	2.24E-26	Solyc02g079010_3	2	44190749	44192541	+	1573	protein_coding	NA && - && PF14364:Domain of unknown function (DUF4408)|PF05553:Cotton fibre expressed protein	-
Solyc01g102490_3	331.0468201	431.5478889	347.1323322	64.51318986	52.55983156	35.67987299	369.9090137	50.91763147	2.865529707	6.13E-28	3.11E-26	Solyc01g102490_3	1	91154857	91167041	+	4200	protein_coding	NA && sp|Q8W3L1|MFDR_ARATH NADPH:adrenodoxin oxidoreductase, mitochondrial OS=Arabidopsis thaliana OX=3702 GN=MFDR PE=1 SV=1 && PF07992:Pyridine nucleotide-disulphide oxidoreductase	-
Solyc02g089065_1	1441.701736	1521.242391	1420.397215	686.9188511	658.4996039	725.7031311	1461.113781	690.373862	1.080640938	7.24E-28	3.67E-26	Solyc02g089065_1	2	51607790	51609953	+	823	protein_coding	NA && sp|B3H4F1|SP1L1_ARATH Protein SPIRAL1-like 1 OS=Arabidopsis thaliana OX=3702 GN=SP1L1 PE=2 SV=1 && -	-
Solyc01g088660_3	87.41929015	118.3509261	86.49854835	488.2475505	449.7619872	479.7668637	97.42292152	472.5921338	-2.283128326	7.30E-28	3.68E-26	Solyc01g088660_3	1	83297043	83298138	+	872	protein_coding	NA && sp|O80506|FLZ3_ARATH FCS-Like Zinc finger 3 OS=Arabidopsis thaliana OX=3702 GN=FLZ3 PE=1 SV=1 && PF04570:zinc-finger of the FCS-type, C2-C2	-
Solyc05g008830_3	260.8247673	249.6915879	301.6067804	840.8707815	813.1756796	781.1343623	270.7077119	811.7269412	-1.580450869	8.38E-28	4.22E-26	Solyc05g008830_3	5	3057390	3060389	+	2299	protein_coding	NA && - && PF00564:PB1 domain	MYB
Solyc07g024000_3	621.9667528	639.3836616	738.6520774	208.2016582	207.2359073	178.399365	666.6674973	197.9456435	1.754479527	1.01E-27	5.07E-26	Solyc07g024000_3	7	23790788	23795637	+	2177	protein_coding	NA && sp|Q5N800|NYC1_ORYSJ Probable chlorophyll(ide) b reductase NYC1, chloroplastic OS=Oryza sativa subsp. japonica OX=39947 GN=NYC1 PE=1 SV=1 && PF00106:short chain dehydrogenase	G2-like
Solyc12g007050_1	404.135079	590.3113264	456.3936565	104.8339335	99.11282522	98.75679132	483.6133539	100.9011834	2.260510249	1.03E-27	5.17E-26	Solyc12g007050_1	12	1490127	1490701	-	198	protein_coding	NA && - && -	-
Solyc05g047530_3	5.732412469	0	4.552555177	285.1776234	244.0277894	305.8274828	3.428322548	278.3442985	-6.308425488	1.49E-27	7.42E-26	Solyc05g047530_3	5	59862879	59865952	-	2984	protein_coding	NA && sp|H2DH22|C7A10_PANGI Cytochrome P450 CYP73A100 OS=Panax ginseng OX=4054 PE=2 SV=1 && PF00067:Cytochrome P450	M-type_MADS
Solyc09g090900_3	170.5392709	165.9799573	73.97902162	797.6176201	710.3085807	758.1973011	136.8327499	755.3745007	-2.476712426	1.58E-27	7.84E-26	Solyc09g090900_3	9	70783641	70788642	+	1922	protein_coding	NA && sp|Q94AR8|LEUC_ARATH 3-isopropylmalate dehydratase large subunit, chloroplastic OS=Arabidopsis thaliana OX=3702 GN=IIL1 PE=1 SV=1 && PF00330:Aconitase family (aconitate hydratase)	-
Solyc03g007760_3	389.8040479	339.1764345	597.5228669	48.38489239	76.58718312	45.87412242	442.1677831	56.94873265	2.962840486	1.70E-27	8.45E-26	Solyc03g007760_3	3	2280512	2288205	-	3290	protein_coding	NA && sp|Q6NW58|SPAST_DANRE Spastin OS=Danio rerio OX=7955 GN=spast PE=2 SV=2 && PF17862:AAA+ lid domain|PF00004:ATPase family associated with various cellular activities (AAA)	FAR1
Solyc06g068460_3	2569.553889	2263.100635	2572.193675	1207.422997	1180.343646	923.2167137	2468.282733	1103.661119	1.162417052	1.91E-27	9.47E-26	Solyc06g068460_3	6	42550570	42552589	+	1691	protein_coding	NA && sp|Q9SAH7|WRK40_ARATH Probable WRKY transcription factor 40 OS=Arabidopsis thaliana OX=3702 GN=WRKY40 PE=1 SV=1 && PF03106:WRKY DNA -binding domain	WRKY
Solyc08g076880_3	505.8854004	691.3426047	677.1925825	166.4147057	130.6487242	103.2167754	624.8068625	133.4267351	2.23042159	2.39E-27	1.18E-25	Solyc08g076880_3	8	60931820	60932718	-	715	protein_coding	NA && - && -	-
Solyc05g050560_1	361.1419855	363.7126021	416.5587987	74.04354745	39.0444463	56.70551244	380.4711287	56.5978354	2.748902294	2.55E-27	1.26E-25	Solyc05g050560_1	5	61560625	61562364	+	1740	protein_coding	NA && sp|A0A3Q7HES4|MTB2_SOLLC Transcription factor MTB2 OS=Solanum lycopersicum OX=4081 GN=MTB2 PE=2 SV=1 && PF00010:Helix-loop-helix DNA-binding domain|PF14215:bHLH-MYC and R2R3-MYB transcription factors N-terminal	bHLH
Solyc07g048060_2	573.2412469	554.2287269	575.8982298	115.8305	168.191461	110.2253219	567.7894012	131.415761	2.113950039	3.33E-27	1.63E-25	Solyc07g048060_2	7	59367806	59368321	+	516	protein_coding	NA && - && PF04526:Protein of unknown function (DUF568)	-
Solyc11g012510_2	964.4783979	1268.664195	1383.976774	370.2177373	366.4171114	457.466943	1205.706456	398.0339306	1.598848013	4.62E-27	2.26E-25	Solyc11g012510_2	11	5329623	5332918	-	2096	protein_coding	NA && sp|Q9M0M5|SCL13_ARATH Scarecrow-like protein 13 OS=Arabidopsis thaliana OX=3702 GN=SCL13 PE=2 SV=2 && PF03514:GRAS domain family	GRAS
Solyc08g077680_3	845.5308391	922.2712409	764.8292697	282.2452056	256.7923199	316.0217322	844.2104499	285.0197526	1.564110332	5.77E-27	2.82E-25	Solyc08g077680_3	8	61704553	61712109	-	2938	protein_coding	NA && sp|F4KEW8|NET4A_ARATH Protein NETWORKED 4A OS=Arabidopsis thaliana OX=3702 GN=NET4A PE=2 SV=1 && PF07765:KIP1-like protein	bHLH
Solyc09g059270_3	316.7157889	232.3719402	216.2463709	811.5466043	1039.93381	848.0341242	255.1113667	899.8381795	-1.822000669	5.82E-27	2.83E-25	Solyc09g059270_3	9	54391836	54395665	+	1303	protein_coding	NA && sp|O44017|ERD2_ENTHI ER lumen protein-retaining receptor OS=Entamoeba histolytica OX=5759 GN=ERD2 PE=3 SV=1 && PF00810:ER lumen protein retaining receptor	M-type_MADS
Solyc02g082900_3	402.7019759	342.0630424	244.6998407	1124.582196	1015.906459	1069.759049	329.8216197	1070.082568	-1.703738255	6.25E-27	3.04E-25	Solyc02g082900_3	2	47086936	47089988	-	1590	protein_coding	NA && sp|Q9SD05|SSL6_ARATH Protein STRICTOSIDINE SYNTHASE-LIKE 6 OS=Arabidopsis thaliana OX=3702 GN=SSL6 PE=2 SV=1 && PF03088:Strictosidine synthase	MYB_related
Solyc11g068710_2	2413.345649	2188.048828	2020.19636	980.8937276	1110.514155	1127.738843	2207.196946	1073.048909	1.039401661	6.70E-27	3.25E-25	Solyc11g068710_2	11	53632471	53633538	+	897	protein_coding	NA && sp|Q9XIN8|FB119_ARATH F-box protein At2g27310 OS=Arabidopsis thaliana OX=3702 GN=At2g27310 PE=2 SV=1 && -	-
Solyc07g054850_3	31.52826858	49.0723352	52.35438453	339.4273512	328.1235199	327.4902628	44.31832944	331.680378	-2.894967861	6.81E-27	3.29E-25	Solyc07g054850_3	7	63159014	63160707	+	1601	protein_coding	NA && sp|Q9SUC9|UGPI7_ARATH Uncharacterized GPI-anchored protein At4g28100 OS=Arabidopsis thaliana OX=3702 GN=At4g28100 PE=2 SV=1 && -	MYB_related
Solyc09g090190_3	1127.852153	1145.983357	976.5230854	346.7583955	327.3726651	196.8764421	1083.452865	290.3358342	1.901622957	7.20E-27	3.47E-25	Solyc09g090190_3	9	70215195	70221423	+	2522	protein_coding	NA && sp|Q940J9|PMT8_ARATH Probable methyltransferase PMT8 OS=Arabidopsis thaliana OX=3702 GN=At1g04430 PE=2 SV=1 && PF03141:Putative S-adenosyl-L-methionine-dependent methyltransferase	NF-YB
Solyc12g005390_2	159.074446	187.6295169	176.4115131	606.2773638	596.1786608	605.9207003	174.3718253	602.7922416	-1.789195222	7.43E-27	3.57E-25	Solyc12g005390_2	12	231757	235838	+	934	protein_coding	NA && sp|Q1ECE0|VAP41_ARATH Vesicle-associated protein 4-1 OS=Arabidopsis thaliana OX=3702 GN=PVA41 PE=2 SV=1 && PF00635:MSP (Major sperm protein) domain	YABBY
Solyc07g055810_3	345.3778512	428.661281	389.2434676	46.1855791	53.31068629	80.27971424	387.7608666	59.92532654	2.688290032	8.29E-27	3.96E-25	Solyc07g055810_3	7	63866013	63875874	+	3163	protein_coding	NA && sp|C0LGE0|Y1765_ARATH Probable LRR receptor-like serine/threonine-protein kinase At1g07650 OS=Arabidopsis thaliana OX=3702 GN=At1g07650 PE=1 SV=1 && PF00069:Protein kinase domain|PF11721:Malectin domain|PF13855:Leucine rich repeat	ERF
Solyc01g095070_3	50.1586091	50.51563917	25.03905347	336.4949335	325.1201009	368.9044011	41.90443392	343.5064785	-3.05516849	1.10E-26	5.26E-25	Solyc01g095070_3	1	86311281	86313721	+	869	nontranslating_CDS	NA && sp|O03982|HIP39_ARATH Heavy metal-associated isoprenylated plant protein 39 OS=Arabidopsis thaliana OX=3702 GN=HIPP39 PE=2 SV=1 && -	-
Solyc08g005090_1	288.0537265	262.6813237	303.883058	38.8545348	33.03760841	45.87412242	284.8727028	39.25542188	2.856092135	1.10E-26	5.26E-25	Solyc08g005090_1	8	62425	63249	-	825	protein_coding	NA && - && -	-
Solyc11g072200_2	263.6909736	281.4442754	226.48962	16.12829746	18.02051368	2.548562357	257.2082897	12.23245783	4.416539786	1.12E-26	5.31E-25	Solyc11g072200_2	11	55718620	55721755	-	1185	protein_coding	NA && sp|P24397|HY6H_HYONI Hyoscyamine 6-dioxygenase OS=Hyoscyamus niger OX=4079 GN=H6H PE=1 SV=1 && PF14226:non-haem dioxygenase in morphine synthesis N-terminal|PF03171:2OG-Fe(II) oxygenase superfamily	Dof
Solyc04g008100_2	1781.347175	1685.779044	1602.499422	680.3209112	759.8649934	511.6238931	1689.875214	650.6032659	1.378136315	1.18E-26	5.60E-25	Solyc04g008100_2	4	1757920	1759176	-	1257	protein_coding	NA && sp|Q5PNY6|PUB21_ARATH U-box domain-containing protein 21 OS=Arabidopsis thaliana OX=3702 GN=PUB21 PE=2 SV=1 && PF04564:U-box domain	Dof
Solyc08g080500_3	779.6080957	857.322562	1068.712328	299.839712	256.0414652	201.3364262	901.8809951	252.4058678	1.840327051	1.28E-26	6.05E-25	Solyc08g080500_3	8	63897776	63902465	-	1757	protein_coding	NA && sp|Q9CAN1|RBL2_ARATH RHOMBOID-like protein 2 OS=Arabidopsis thaliana OX=3702 GN=RBL2 PE=1 SV=1 && PF01694:Rhomboid family	-
Solyc01g073650_3	700.7874243	555.6720309	546.3066212	1423.688803	1387.579553	1433.566326	600.9220255	1414.944894	-1.237568261	1.53E-26	7.20E-25	Solyc01g073650_3	1	80898021	80911368	-	2754	protein_coding	NA && sp|O04860|PP2A5_TOBAC Serine/threonine-protein phosphatase PP2A-5 catalytic subunit OS=Nicotiana tabacum OX=4097 GN=NPP5 PE=2 SV=1 && PF00149:Calcineurin-like phosphoesterase	bHLH
Solyc05g012110_3	272.2895923	138.5571817	179.8259295	738.2361612	899.5239743	989.479335	196.8909012	875.7464902	-2.155104071	1.59E-26	7.44E-25	Solyc05g012110_3	5	5316485	5320257	-	1287	protein_coding	NA && sp|Q9LMX8|6PGL1_ARATH Probable 6-phosphogluconolactonase 1 OS=Arabidopsis thaliana OX=3702 GN=PGL1 PE=2 SV=1 && PF01182:Glucosamine-6-phosphate isomerases/6-phosphogluconolactonase	-
Solyc02g065770_3	1670.998235	1757.944243	1704.931914	528.5682942	807.9196965	586.1693421	1711.291464	640.8857776	1.417657029	2.26E-26	1.06E-24	Solyc02g065770_3	2	37479924	37483994	-	2340	protein_coding	NA && sp|Q94KT8|COBRA_ARATH Protein COBRA OS=Arabidopsis thaliana OX=3702 GN=COB PE=2 SV=1 && PF04833:COBRA-like protein	C2H2
Solyc01g109600_3	80.25377456	83.71163063	47.80182935	489.7137594	415.973524	386.7443376	70.58907818	430.8105404	-2.622290114	2.74E-26	1.28E-24	Solyc01g109600_3	1	96412245	96423533	+	1886	protein_coding	NA && sp|Q9CAJ9|Y1385_ARATH BTB/POZ domain-containing protein At1g63850 OS=Arabidopsis thaliana OX=3702 GN=At1g63850 PE=1 SV=1 && -	C2H2
Solyc02g084650_3	421.3323164	464.7438804	371.0332469	88.70563606	63.07179787	91.11110425	419.0364812	80.96284606	2.368070175	2.74E-26	1.28E-24	Solyc02g084650_3	2	48380404	48381860	+	864	protein_coding	NA && - && PF09791:Oxidoreductase-like protein, N-terminal	SRS
Solyc07g008620_1	83.1199808	109.6911022	104.7087691	477.2509841	432.4923282	449.821256	99.17328402	453.1881894	-2.190003622	4.07E-26	1.89E-24	EIX1	7	3569764	3572859	-	3096	protein_coding	NA && sp|Q6JN47|EIX1_SOLLC Receptor-like protein EIX1 OS=Solanum lycopersicum OX=4081 GN=EIX1 PE=2 SV=2 && PF08263:Leucine rich repeat N-terminal domain|PF13855:Leucine rich repeat	ARR-B
Solyc08g075420_3	272.2895923	189.0728209	216.2463709	804.9486644	757.6124291	707.226054	225.8695947	756.5957158	-1.744879312	4.57E-26	2.12E-24	Solyc08g075420_3	8	59667658	59677051	-	2811	protein_coding	NA && sp|Q8VZ67|Y4919_ARATH Uncharacterized zinc finger CCHC domain-containing protein At4g19190 OS=Arabidopsis thaliana OX=3702 GN=At4g19190 PE=2 SV=1 && PF03947:Ribosomal Proteins L2, C-terminal domain|PF10197:N-terminal domain of CBF1 interacting co-repressor CIR	M-type_MADS
Solyc04g077120_3	308.1171702	402.6818094	386.96719	74.77665188	52.55983156	63.07691833	365.9220565	63.47113392	2.527527086	4.62E-26	2.14E-24	Solyc04g077120_3	4	62156255	62164026	+	3303	protein_coding	NA && sp|Q9SUG3|ITPK3_ARATH Inositol-tetrakisphosphate 1-kinase 3 OS=Arabidopsis thaliana OX=3702 GN=ITPK3 PE=1 SV=2 && PF05770:Inositol 1,3,4-trisphosphate 5/6-kinase ATP-grasp domain|PF17927:Inositol 1,3,4-trisphosphate 5/6-kinase pre-ATP-grasp domain	NAC
Solyc07g062480_1	128.9792805	82.26832666	149.096182	511.7068923	645.7350734	585.5322015	120.1145964	580.9913891	-2.266193361	5.64E-26	2.60E-24	Solyc07g062480_1	7	65331937	65332830	-	894	protein_coding	NA && sp|Q39688|EP1G_DAUCA Epidermis-specific secreted glycoprotein EP1 OS=Daucus carota OX=4039 GN=EP1 PE=1 SV=1 && PF01453:D-mannose binding lectin	FAR1
Solyc10g083760_2	878.4922108	753.4046757	583.8652014	1749.920275	1904.167612	1843.247725	738.5873626	1832.445204	-1.314363897	5.71E-26	2.62E-24	Solyc10g083760_2	10	63636332	63642888	-	3094	protein_coding	NA && sp|A0FKE6|TD1_SOLLC Threonine dehydratase 1 biosynthetic, chloroplastic OS=Solanum lycopersicum OX=4081 GN=TD1 PE=1 SV=1 && PF00585:C-terminal regulatory domain of Threonine dehydratase|PF00291:Pyridoxal-phosphate dependent enzyme	Trihelix
Solyc02g077240_3	392.6702541	303.093835	284.5346985	920.0460599	941.5718396	1143.667358	326.7662626	1001.761752	-1.619669362	5.78E-26	2.65E-24	Solyc02g077240_3	2	42807941	42811007	+	2165	nontranslating_CDS	NA && sp|P51850|PDC1_PEA Pyruvate decarboxylase 1 OS=Pisum sativum OX=3888 GN=PDC1 PE=2 SV=1 && PF00205:Thiamine pyrophosphate enzyme, central domain|PF02776:Thiamine pyrophosphate enzyme, N-terminal TPP binding domain|PF02775:Thiamine pyrophosphate enzyme, C-terminal TPP binding domain	NF-YC
Solyc01g111250_3	407.0012853	324.7433947	397.2104392	80.64148732	74.33461891	71.35974599	376.318373	75.44528408	2.320008052	6.36E-26	2.91E-24	Solyc01g111250_3	1	97477781	97478877	+	1018	protein_coding	NA && - && PF00388:Phosphatidylinositol-specific phospholipase C, X domain	-
Solyc04g014330_1	299.5185515	349.2795623	275.4295882	48.38489239	48.05470314	53.51980949	308.0759007	49.98646834	2.62092521	7.51E-26	3.43E-24	Solyc04g014330_1	4	4608961	4609287	-	327	protein_coding	NA && - && -	-
Solyc07g063010_3	114.6482494	83.71163063	143.4054881	802.7493511	521.8440419	528.826689	113.9217894	617.806694	-2.431211746	1.18E-25	5.36E-24	Solyc07g063010_3	7	65751400	65754564	+	1388	protein_coding	NA && sp|Q45223|HBD_BRADU 3-hydroxybutyryl-CoA dehydrogenase OS=Bradyrhizobium diazoefficiens (strain JCM 10833 / BCRC 13528 / IAM 13628 / NBRC 14792 / USDA 110) OX=224911 GN=hbdA PE=3 SV=1 && PF00725:3-hydroxyacyl-CoA dehydrogenase, C-terminal domain|PF02737:3-hydroxyacyl-CoA dehydrogenase, NAD binding domain	MYB_related
Solyc03g123460_3	240.7613237	297.3206191	118.3664346	8.797253163	1.501709473	8.919968249	218.8161258	6.406310295	5.074226267	1.32E-25	6.02E-24	Solyc03g123460_3	3	71807480	71808797	+	743	protein_coding	NA && sp|P0DO11|FLZ17_ARATH FCS-Like Zinc finger 17 OS=Arabidopsis thaliana OX=3702 GN=FLZ17 PE=1 SV=1 && PF04570:zinc-finger of the FCS-type, C2-C2	-
Solyc06g008620_1	67.35584651	56.28885508	63.73577247	320.366636	374.6765135	380.3729317	62.46015802	358.4720271	-2.519999466	1.88E-25	8.49E-24	Solyc06g008620_1	6	2516156	2518138	-	1983	protein_coding	NA && - && PF07676:WD40-like Beta Propeller Repeat	-
Solyc02g088690_3	1668.132028	2104.337198	1799.397434	807.8810821	636.7248166	856.9540925	1857.288887	767.1866637	1.274473149	2.36E-25	1.06E-23	Solyc02g088690_3	2	51317208	51319965	-	1641	protein_coding	NA && sp|Q9LIA8|UGDH2_ARATH UDP-glucose 6-dehydrogenase 2 OS=Arabidopsis thaliana OX=3702 GN=UGD2 PE=1 SV=1 && PF03720:UDP-glucose/GDP-mannose dehydrogenase family, UDP binding domain|PF03721:UDP-glucose/GDP-mannose dehydrogenase family, NAD binding domain|PF00984:UDP-glucose/GDP-mannose dehydrogenase family, central domain	C2H2
Solyc07g063650_3	187.7365083	177.5263891	163.8919864	747.7665188	587.168404	579.7979362	176.3849613	638.2442863	-1.857330771	2.52E-25	1.13E-23	Solyc07g063650_3	7	66186965	66200643	-	4180	protein_coding	NA && sp|Q8L6Y1|UBP14_ARATH Ubiquitin carboxyl-terminal hydrolase 14 OS=Arabidopsis thaliana OX=3702 GN=UBP14 PE=1 SV=1 && PF17807:Variant UBP zinc finger|PF00627:UBA/TS-N domain|PF00443:Ubiquitin carboxyl-terminal hydrolase|PF02148:Zn-finger in ubiquitin-hydrolases and other protein	GeBP
Solyc07g008930_1	1967.65058	1727.63486	2025.887054	359.2211708	185.4611199	277.7932969	1907.057498	274.1585292	2.798130036	2.63E-25	1.18E-23	Solyc07g008930_1	7	3936054	3936653	-	600	protein_coding	NA && - && PF14009:Domain of unknown function (DUF4228)	-
Solyc09g011670_3	669.2591557	545.5689031	702.231636	181.0767943	201.9799241	151.6394602	639.0198983	178.2320595	1.845084471	2.88E-25	1.29E-23	Solyc09g011670_3	9	4910693	4915143	-	672	protein_coding	NA && - && PF00582:Universal stress protein family	-
Solyc10g084120_2	167.6730647	151.5469175	193.483595	1.46620886	0	3.822843535	170.9011924	1.763017465	6.528281745	3.33E-25	1.49E-23	Solyc10g084120_2	10	63896303	63898707	-	1155	protein_coding	NA && sp|P43286|PIP21_ARATH Aquaporin PIP2-1 OS=Arabidopsis thaliana OX=3702 GN=PIP2-1 PE=1 SV=1 && PF00230:Major intrinsic protein	C3H
Solyc02g067610_1	1476.096211	1430.314241	1180.24993	599.6794239	488.0555787	581.7093579	1362.220127	556.4814535	1.289764074	3.47E-25	1.55E-23	Solyc02g067610_1	2	38316483	38316806	+	324	protein_coding	NA && - && -	-
Solyc10g050890_2	541.7129783	379.5889458	454.1173789	1212.554728	1159.319713	1179.984371	458.473101	1183.952937	-1.36879225	3.53E-25	1.57E-23	Solyc10g050890_2	10	51044816	51047527	-	2258	protein_coding	NA && sp|P38500|NIR_BETPN Ferredoxin--nitrite reductase, chloroplastic OS=Betula pendula OX=3505 GN=NIR1 PE=2 SV=1 && PF01077:Nitrite and sulphite reductase 4Fe-4S domain|PF03460:Nitrite/Sulfite reductase ferredoxin-like half domain	-
Solyc03g112340_1	412.7336977	342.0630424	276.567727	1065.200737	1075.974837	923.2167137	343.7881557	1021.464096	-1.57523881	3.60E-25	1.60E-23	Solyc03g112340_1	3	64251788	64252984	+	1197	protein_coding	NA && sp|Q8LGA5|ATL31_ARATH E3 ubiquitin-protein ligase ATL31 OS=Arabidopsis thaliana OX=3702 GN=ATL31 PE=1 SV=2 && PF13639:Ring finger domain	C3H
Solyc07g009060_3	170.5392709	226.5987243	149.096182	691.3174777	681.025246	619.3006527	182.0780591	663.8811255	-1.871784448	4.27E-25	1.89E-23	Solyc07g009060_3	7	4032224	4033345	-	920	protein_coding	NA && - && -	-
Solyc09g064940_3	174.8385803	248.2482839	246.9761183	733.8375347	827.4419196	702.1289293	223.3543275	754.4694612	-1.752991064	4.30E-25	1.90E-23	Solyc09g064940_3	9	62711504	62719502	+	2117	protein_coding	NA && sp|Q9KG32|Y283_BACHD Uncharacterized isomerase BH0283 OS=Bacillus halodurans (strain ATCC BAA-125 / DSM 18197 / FERM 7344 / JCM 9153 / C-125) OX=272558 GN=BH0283 PE=3 SV=1 && PF02567:Phenazine biosynthesis-like protein|PF13902:R3H-associated N-terminal domain	-
Solyc03g019690_1	51.59171222	34.63929543	47.80182935	384.8798259	290.580783	304.5532016	44.67761234	326.6712702	-2.866417536	4.50E-25	1.98E-23	Solyc03g019690_1	3	62916751	62917404	+	654	protein_coding	NA && sp|Q41433|SPI6_SOLTU Probable serine protease inhibitor 6 OS=Solanum tuberosum OX=4113 PE=2 SV=1 && PF00197:Trypsin and protease inhibitor	-
Solyc08g016440_3	186.3034052	277.1143635	324.3695563	32.98969936	22.5256421	19.75135826	262.595775	25.08889991	3.393739984	5.07E-25	2.23E-23	Solyc08g016440_3	8	7578273	7580889	+	989	nontranslating_CDS	NA && - && -	-
Solyc10g011740_3	1102.056297	1018.972607	1000.424	359.2211708	443.7551493	440.2641471	1040.484301	414.4134891	1.327208206	5.38E-25	2.37E-23	Solyc10g011740_3	10	3970344	3974153	-	982	protein_coding	NA && sp|Q94F47|UBC28_ARATH Ubiquitin-conjugating enzyme E2 28 OS=Arabidopsis thaliana OX=3702 GN=UBC28 PE=1 SV=1 && PF00179:Ubiquitin-conjugating enzyme	MYB_related
Solyc03g116340_3	1143.616287	1538.562039	1332.760528	545.4296961	584.9158397	505.2524872	1338.312951	545.199341	1.296110422	7.10E-25	3.11E-23	Solyc03g116340_3	3	67305883	67309101	+	1184	protein_coding	NA && sp|Q9SN74|BH047_ARATH Transcription factor bHLH47 OS=Arabidopsis thaliana OX=3702 GN=BHLH47 PE=1 SV=1 && -	bHLH
Solyc08g076860_3	253.6592517	248.2482839	284.5346985	786.6210536	896.5205554	702.7660699	262.1474114	795.3025596	-1.598126292	7.21E-25	3.15E-23	Solyc08g076860_3	8	60889188	60891391	-	1428	protein_coding	NA && sp|Q1G3Q4|RITF1_ARATH Protein RGF1 INDUCIBLE TRANSCRIPTION FACTOR 1 OS=Arabidopsis thaliana OX=3702 GN=RITF1 PE=1 SV=1 && PF04640:PLATZ transcription factor	Trihelix
Solyc11g010270_2	194.9020239	318.9701788	330.0602503	1038.075873	919.0461975	925.1281355	281.3108177	960.7500687	-1.768232807	9.17E-25	3.99E-23	Solyc11g010270_2	11	3354630	3357745	-	1656	protein_coding	NA && sp|P46667|ATHB5_ARATH Homeobox-leucine zipper protein ATHB-5 OS=Arabidopsis thaliana OX=3702 GN=ATHB-5 PE=1 SV=1 && PF02183:Homeobox associated leucine zipper|PF00046:Homeodomain	HD-ZIP
Solyc11g028100_2	442.8288632	391.1353776	273.1533106	1013.150323	1482.938105	1236.052743	369.0391838	1244.047057	-1.757639799	9.36E-25	4.07E-23	Solyc11g028100_2	11	20292949	20295592	+	1798	protein_coding	NA && sp|Q6YW46|EF1G2_ORYSJ Elongation factor 1-gamma 2 OS=Oryza sativa subsp. japonica OX=39947 GN=Os02g0220500 PE=2 SV=2 && PF00647:Elongation factor 1 gamma, conserved domain|PF02798:Glutathione S-transferase, N-terminal domain|PF00043:Glutathione S-transferase, C-terminal domain	-
Solyc01g006370_3	889.9570358	734.641724	769.3818248	287.3769366	211.7410357	271.421891	797.9935282	256.8466211	1.63428282	1.03E-24	4.46E-23	Solyc01g006370_3	1	983202	1005282	-	6437	protein_coding	NA && sp|Q9LXT9|CALS3_ARATH Callose synthase 3 OS=Arabidopsis thaliana OX=3702 GN=CALS3 PE=3 SV=3 && PF04652:Vta1 like|PF14288:1,3-beta-glucan synthase subunit FKS1, domain-1|PF02364:1,3-beta-glucan synthase component	M-type_MADS
Solyc01g101090_3	422.7654196	330.5166106	360.7899977	70.3780253	57.06495997	82.19113601	371.3573426	69.87804043	2.406384902	1.10E-24	4.74E-23	Solyc01g101090_3	1	90816729	90823228	+	1858	protein_coding	NA && sp|Q96CN4|EVI5L_HUMAN EVI5-like protein OS=Homo sapiens OX=9606 GN=EVI5L PE=1 SV=1 && PF00566:Rab-GTPase-TBC domain	-
Solyc01g007030_3	2122.425717	2192.37874	2278.553866	140.7560506	228.2598399	90.47396366	2197.786108	153.1632847	3.844389096	1.35E-24	5.82E-23	Solyc01g007030_3	1	1582086	1582763	-	678	protein_coding	NA && sp|Q9SVC6|PUB22_ARATH E3 ubiquitin-protein ligase PUB22 OS=Arabidopsis thaliana OX=3702 GN=PUB22 PE=1 SV=1 && -	Dof
Solyc05g046010_3	779.6080957	799.5904029	787.5920455	282.9783101	214.7444546	294.3589522	788.9301814	264.027239	1.577705656	1.60E-24	6.90E-23	Solyc05g046010_3	5	58895165	58897161	-	1265	protein_coding	NA && sp|O23044|PER3_ARATH Peroxidase 3 OS=Arabidopsis thaliana OX=3702 GN=PER3 PE=2 SV=1 && PF00141:Peroxidase	NAC
Solyc09g082860_3	710.8191461	829.8997864	859.2947896	1605.498702	1657.136403	1872.556192	800.004574	1711.730432	-1.096262294	1.81E-24	7.78E-23	Solyc09g082860_3	9	68969730	68975978	+	4029	protein_coding	NA && sp|Q9LIK9|APS1_ARATH ATP sulfurylase 1, chloroplastic OS=Arabidopsis thaliana OX=3702 GN=APS1 PE=1 SV=1 && PF01747:ATP-sulfurylase|PF14306:PUA-like domain	MYB_related
Solyc07g053480_3	652.0619183	851.5493461	707.92233	189.8740474	237.2700967	141.4452108	737.1778648	189.529785	1.961919432	1.87E-24	8.00E-23	Solyc07g053480_3	7	62054552	62057418	+	1261	protein_coding	NA && sp|Q9FJH0|RAA1F_ARATH Ras-related protein RABA1f OS=Arabidopsis thaliana OX=3702 GN=RABA1F PE=2 SV=1 && PF00071:Ras family	WOX
Solyc06g050870_3	0	0	0	1158.305	1112.015865	969.7279767	0	1080.01628	-12.1074782	1.93E-24	8.24E-23	Solyc06g050870_3	6	33800848	33801501	-	504	protein_coding	NA && - && -	-
Solyc02g087330_3	541.7129783	548.455511	457.5317952	79.17527846	140.4098357	111.4996031	515.9000949	110.3615724	2.224319643	2.15E-24	9.18E-23	Solyc02g087330_3	2	50402604	50404497	-	567	protein_coding	NA && - && -	-
Solyc03g118200_3	786.7736113	649.4867894	637.3577247	174.4788544	102.1162442	192.4164579	691.2060418	156.3371855	2.141317087	2.46E-24	1.05E-22	Solyc03g118200_3	3	68619340	68629711	-	2227	protein_coding	NA && sp|Q941L3|BON1_ARATH Protein BONZAI 1 OS=Arabidopsis thaliana OX=3702 GN=BON1 PE=1 SV=2 && PF07002:Copine|PF00168:C2 domain	ERF
Solyc06g007440_3	223.5640863	265.5679317	183.2403459	26.39175949	22.5256421	17.20279591	224.1241213	22.04006583	3.349509419	2.65E-24	1.13E-22	Solyc06g007440_3	6	1452508	1454294	-	1274	protein_coding	NA && sp|O22932|CIPKB_ARATH CBL-interacting serine/threonine-protein kinase 11 OS=Arabidopsis thaliana OX=3702 GN=CIPK11 PE=1 SV=1 && PF00069:Protein kinase domain|PF03822:NAF domain	YABBY
Solyc05g050970_3	642.0301965	562.8885508	521.2675677	1234.54786	1332.016303	1288.298271	575.3954383	1284.954145	-1.161354721	2.80E-24	1.19E-22	Solyc05g050970_3	5	62032218	62036565	+	2944	protein_coding	NA && sp|Q43848|TKTC_SOLTU Transketolase, chloroplastic OS=Solanum tuberosum OX=4113 PE=2 SV=1 && PF02780:Transketolase, C-terminal domain|PF00456:Transketolase, thiamine diphosphate binding domain|PF02779:Transketolase, pyrimidine binding domain	-
Solyc10g008400_2	227.8633956	334.8465225	352.8230262	942.7722973	1060.206888	880.5282943	305.1776481	961.1691598	-1.651406585	3.18E-24	1.34E-22	Solyc10g008400_2	10	2523186	2528910	+	1299	protein_coding	NA && sp|Q6R567|RMA1_CAPAN E3 ubiquitin-protein ligase RMA1H1 OS=Capsicum annuum OX=4072 GN=RMA1H1 PE=1 SV=1 && PF00097:Zinc finger, C3HC4 type (RING finger)	-
Solyc02g091180_1	404.135079	427.217977	423.3876314	115.8305	89.35171365	94.2968072	418.2468958	99.82634027	2.067543734	3.27E-24	1.38E-22	Solyc02g091180_1	2	53203500	53204000	+	501	protein_coding	NA && - && PF14009:Domain of unknown function (DUF4228)	bHLH
Solyc07g053760_3	915.7528919	915.054721	995.8714449	421.5350474	369.4205304	365.0815576	942.2263526	385.3457118	1.291147572	3.37E-24	1.42E-22	Solyc07g053760_3	7	62319501	62322435	-	1877	protein_coding	NA && sp|Q93YW5|P2C58_ARATH Probable protein phosphatase 2C 58 OS=Arabidopsis thaliana OX=3702 GN=At4g28400 PE=2 SV=1 && PF00481:Protein phosphatase 2C	CAMTA
Solyc09g008200_3	48.72550598	17.31964772	59.1832173	843.8031992	1057.954324	911.1110425	41.74279033	937.6228552	-4.479814544	3.50E-24	1.47E-22	Solyc09g008200_3	9	1653017	1655519	-	1582	protein_coding	NA && sp|Q9SJL2|HIP5_ARATH Heavy metal-associated isoprenylated plant protein 5 OS=Arabidopsis thaliana OX=3702 GN=HIPP05 PE=1 SV=2 && PF00403:Heavy-metal-associated domain	NAC
Solyc08g007830_1	647.762609	492.166656	574.760091	0	0	0	571.5631187	0	12.10540566	4.00E-24	1.68E-22	Solyc08g007830_1	8	2339145	2339834	-	690	protein_coding	NA && sp|Q9LN86|DRE1F_ARATH Dehydration-responsive element-binding protein 1F OS=Arabidopsis thaliana OX=3702 GN=DREB1F PE=2 SV=1 && PF00847:AP2 domain	ERF
Solyc09g065280_3	438.5295539	362.2692981	408.5918271	1027.812411	1138.295781	932.7738226	403.1302263	1032.960671	-1.356596492	4.09E-24	1.71E-22	Solyc09g065280_3	9	63579476	63586323	+	2325	protein_coding	NA && sp|Q8BM39|PRP18_MOUSE Pre-mRNA-splicing factor 18 OS=Mus musculus OX=10090 GN=Prpf18 PE=1 SV=1 && PF02840:Prp18 domain|PF00400:WD domain, G-beta repeat|PF08799:pre-mRNA processing factor 4 (PRP4) like	HD-ZIP
Solyc12g017460_1	1317.021765	1083.921286	875.2287327	61.58077214	24.02735157	64.9883401	1092.057261	50.19882127	4.440575696	4.19E-24	1.74E-22	Solyc12g017460_1	12	6720607	6721716	-	1110	protein_coding	NA && sp|Q3MKY2|AAE_RAUSE Acetylajmalan esterase OS=Rauvolfia serpentina OX=4060 GN=AAE PE=1 SV=1 && PF00657:GDSL-like Lipase/Acylhydrolase	B3
Solyc02g093900_3	621.9667528	591.7546303	595.2465893	1295.395528	1240.412025	1232.86704	602.9893242	1256.224864	-1.059141862	4.57E-24	1.90E-22	Solyc02g093900_3	2	55236747	55242895	-	2740	protein_coding	NA && sp|Q9FKS5|CYC1B_ARATH Cytochrome c1 2, heme protein, mitochondrial OS=Arabidopsis thaliana OX=3702 GN=CYC1-2 PE=1 SV=1 && PF02167:Cytochrome C1 family	-
Solyc01g006400_3	703.6536305	930.9310648	984.4900569	277.8465791	284.5739451	317.933154	873.0249174	293.4512261	1.573319847	4.71E-24	1.95E-22	Solyc01g006400_3	1	1020863	1022356	-	661	protein_coding	NA && - && -	-
Solyc02g092000_3	462.8923068	763.5078035	390.3816064	62.31387657	90.85342312	104.4910566	538.9272389	85.88611877	2.645802742	4.83E-24	2.00E-22	Solyc02g092000_3	2	53857265	53861159	-	1144	protein_coding	NA && sp|Q9M2Y6|CGR2_ARATH Probable pectin methylesterase CGR2 OS=Arabidopsis thaliana OX=3702 GN=CGR2 PE=2 SV=1 && -	-
Solyc12g008370_2	323.8813045	261.2380197	259.4956451	804.9486644	771.8786691	788.7800494	281.5383231	788.5357943	-1.488094295	5.14E-24	2.13E-22	Solyc12g008370_2	12	1801170	1802966	+	1728	protein_coding	NA && sp|Q6K8D9|SKIPA_ORYSJ SNW/SKI-interacting protein A OS=Oryza sativa subsp. japonica OX=39947 GN=SKIPA PE=1 SV=1 && PF02731:SKIP/SNW domain	BBR-BPC
Solyc02g071560_3	402.7019759	518.1461275	481.4327099	1200.091952	1052.698341	1179.984371	467.4269378	1144.258221	-1.291142229	5.18E-24	2.14E-22	Solyc02g071560_3	2	41533833	41537474	-	3107	protein_coding	NA && sp|Q9FK76|SBT56_ARATH Subtilisin-like protease SBT5.6 OS=Arabidopsis thaliana OX=3702 GN=SBT5.6 PE=2 SV=1 && PF17766:Fibronectin type-III domain|PF00082:Subtilase family|PF05922:Peptidase inhibitor I9	DBB
Solyc06g054420_3	455.7267913	394.0219856	334.6128055	1270.469978	936.3158564	1380.683657	394.7871941	1195.823164	-1.602151437	5.85E-24	2.41E-22	Solyc06g054420_3	6	37313117	37317988	+	1660	protein_coding	NA && sp|A4FUZ5|SERC3_BOVIN Serine incorporator 3 OS=Bos taurus OX=9913 GN=SERINC3 PE=2 SV=1 && PF03348:Serine incorporator (Serinc)	NAC
Solyc04g074470_1	358.2757793	385.3621617	479.1564323	66.71250315	84.84658523	40.13985712	407.5981244	63.8996485	2.68035156	7.03E-24	2.89E-22	Solyc04g074470_1	4	60539581	60540510	+	930	protein_coding	NA && sp|Q9FE06|EXOL2_ARATH Protein EXORDIUM-like 2 OS=Arabidopsis thaliana OX=3702 GN=EXL2 PE=2 SV=1 && PF04674:Phosphate-induced protein 1 conserved region	MYB
Solyc06g072110_3	508.7516066	434.4344969	492.8140979	106.3001424	141.1606905	124.2424149	478.6667338	123.9010826	1.950508504	7.11E-24	2.91E-22	Solyc06g072110_3	6	44579456	44588138	+	3639	protein_coding	NA && sp|O94464|NVJ2_SCHPO Nucleus-vacuole junction protein 2 OS=Schizosaccharomyces pombe (strain 972 / ATCC 24843) OX=284812 GN=nvj2 PE=1 SV=3 && -	MYB
Solyc04g025650_3	1607.941697	1231.138292	1385.114912	583.5511265	658.4996039	604.0092786	1408.064967	615.3533363	1.194334943	7.92E-24	3.24E-22	Solyc04g025650_3	4	21290588	21295307	+	1617	protein_coding	NA && sp|O81815|MO1_ARATH Monooxygenase 1 OS=Arabidopsis thaliana OX=3702 GN=MO1 PE=2 SV=1 && PF01494:FAD binding domain	-
Solyc01g008650_3	40.12688728	28.86607953	66.01205006	381.9474081	416.7243788	290.5361087	45.00167229	363.0692985	-2.991966376	8.02E-24	3.27E-22	Solyc01g008650_3	1	2646366	2648933	-	1882	protein_coding	NA && sp|A6YIH8|C7D55_HYOMU Premnaspirodiene oxygenase OS=Hyoscyamus muticus OX=35626 GN=CYP71D55 PE=1 SV=1 && PF00067:Cytochrome P450	E2F/DP
Solyc09g061890_3	207.799952	152.9902215	178.6877907	0	0	3.822843535	179.8259881	1.274281178	7.020445058	1.01E-23	4.11E-22	Solyc09g061890_3	9	60851839	60856726	+	2815	protein_coding	NA && sp|Q93WF1|PLY20_ARATH Probable pectate lyase 20 OS=Arabidopsis thaliana OX=3702 GN=At5g48900 PE=2 SV=1 && PF00544:Pectate lyase	AP2
Solyc01g100270_3	17.19723741	36.08259941	29.59160865	244.8568797	286.8265093	256.1305169	27.62381515	262.6046353	-3.245430489	1.18E-23	4.80E-22	Solyc01g100270_3	1	90214008	90228738	+	2455	protein_coding	NA && - && PF01612:3'-5' exonuclease	C2H2
Solyc08g005800_3	910.0204794	922.2712409	1065.297911	423.0012562	379.9324967	391.8414624	965.8632105	398.2584051	1.279528059	1.26E-23	5.13E-22	Solyc08g005800_3	8	613993	628982	+	2394	protein_coding	NA && sp|Q6DBP4|PAE8_ARATH Pectin acetylesterase 8 OS=Arabidopsis thaliana OX=3702 GN=PAE8 PE=2 SV=1 && PF03283:Pectinacetylesterase	bHLH
Solyc09g083100_1	388.3709448	535.4657752	320.9551399	81.37459175	71.33119997	83.46541718	414.93062	78.7237363	2.394841604	1.41E-23	5.69E-22	Solyc09g083100_1	9	69208419	69209723	+	1305	protein_coding	NA && sp|Q9XIW0|CIPK7_ARATH CBL-interacting serine/threonine-protein kinase 7 OS=Arabidopsis thaliana OX=3702 GN=CIPK7 PE=1 SV=1 && PF00069:Protein kinase domain|PF03822:NAF domain	bHLH
Solyc12g009510_2	726.5832804	736.085028	694.2646644	114.3642911	63.07179787	184.7707709	718.9776576	120.7356199	2.569170163	1.49E-23	6.04E-22	Solyc12g009510_2	12	2768304	2779537	-	7210	protein_coding	NA && sp|Q9C637|RLP6_ARATH Receptor-like protein 6 OS=Arabidopsis thaliana OX=3702 GN=RLP6 PE=3 SV=1 && PF13855:Leucine rich repeat|PF08263:Leucine rich repeat N-terminal domain	GATA
Solyc04g074270_3	1132.151463	1076.704766	1349.83261	505.1089524	517.3389135	525.6409861	1186.229613	516.0296173	1.202350891	1.53E-23	6.18E-22	Solyc04g074270_3	4	60354393	60362757	+	5084	protein_coding	NA && - && PF13855:Leucine rich repeat|PF12799:Leucine Rich repeats (2 copies)	-
Solyc03g111690_3	71.65515586	96.70136642	91.05110353	457.4571645	349.8983072	468.9354736	86.4692086	425.4303151	-2.2972968	1.78E-23	7.18E-22	Solyc03g111690_3	3	63827404	63832904	+	1974	protein_coding	NA && sp|Q93Z25|PLY22_ARATH Probable pectate lyase 22 OS=Arabidopsis thaliana OX=3702 GN=At5g63180 PE=2 SV=1 && PF00544:Pectate lyase	AP2
Solyc06g076080_2	587.572278	554.2287269	616.8712264	196.4719873	182.457701	201.9735668	586.2240771	193.6344183	1.598187521	1.85E-23	7.43E-22	Solyc06g076080_2	6	47376773	47379915	-	641	protein_coding	NA && - && -	-
Solyc06g066600_3	186.3034052	158.7634374	174.1352355	10.26346202	15.76794947	12.74281178	173.0673594	12.92474109	3.744741199	2.40E-23	9.61E-22	Solyc06g066600_3	6	41958871	41965288	-	1476	protein_coding	NA && sp|Q2V4B9|PLST3_ARATH Probable plastidic glucose transporter 3 OS=Arabidopsis thaliana OX=3702 GN=At1g79820 PE=2 SV=2 && PF00083:Sugar (and other) transporter	GRAS
Solyc05g054365_1	250.7930455	425.774673	285.6728373	976.4951011	1037.681246	1014.327818	320.746852	1009.501388	-1.656626492	2.49E-23	9.97E-22	Solyc05g054365_1	5	65131929	65140653	-	2600	protein_coding	NA && sp|Q8RWZ3|IBR3_ARATH Probable acyl-CoA dehydrogenase IBR3 OS=Arabidopsis thaliana OX=3702 GN=IBR3 PE=1 SV=1 && PF01636:Phosphotransferase enzyme family|PF02771:Acyl-CoA dehydrogenase, N-terminal domain|PF00441:Acyl-CoA dehydrogenase, C-terminal domain|PF02770:Acyl-CoA dehydrogenase, middle domain	-
Solyc04g076210_2	173.4054772	251.1348919	184.3784847	654.6622562	694.5406313	660.714791	202.9729512	669.9725595	-1.725646396	2.55E-23	1.02E-21	Solyc04g076210_2	4	61229831	61238475	+	3761	protein_coding	NA && sp|Q9SB51|UBP16_ARATH Ubiquitin carboxyl-terminal hydrolase 16 OS=Arabidopsis thaliana OX=3702 GN=UBP16 PE=1 SV=1 && PF00443:Ubiquitin carboxyl-terminal hydrolase|PF01753:MYND finger	B3
Solyc06g062380_3	1206.672825	1118.560582	852.4659568	398.80881	408.4649767	348.5159023	1059.233121	385.2632297	1.458166458	2.57E-23	1.02E-21	Solyc06g062380_3	6	39460073	39461451	-	1081	protein_coding	NA && sp|P27061|PPA1_SOLLC Acid phosphatase 1 OS=Solanum lycopersicum OX=4081 GN=APS1 PE=2 SV=1 && PF03767:HAD superfamily, subfamily IIIB (Acid phosphatase)	MYB
Solyc10g080610_1	111.7820431	137.1138778	180.9640683	522.7034587	605.1889176	581.7093579	143.2866631	569.8672448	-1.983639102	2.66E-23	1.06E-21	Solyc10g080610_1	10	61968404	61969438	+	1035	protein_coding	NA && sp|O80582|FBK46_ARATH F-box/kelch-repeat protein At2g44130 OS=Arabidopsis thaliana OX=3702 GN=At2g44130 PE=2 SV=2 && PF01344:Kelch motif|PF00646:F-box domain	bHLH
Solyc04g077020_3	1200.940412	1437.530761	1254.228951	532.2338163	313.1064251	454.9183807	1297.566708	433.4195407	1.581168108	3.02E-23	1.20E-21	Solyc04g077020_3	4	62076365	62079179	+	1661	protein_coding	NA && sp|P33629|TBA_PRUDU Tubulin alpha chain OS=Prunus dulcis OX=3755 GN=TUBA PE=2 SV=1 && PF00091:Tubulin/FtsZ family, GTPase domain|PF03953:Tubulin C-terminal domain	Nin-like
Solyc10g076240_2	3074.006186	2616.710109	3654.563668	1590.103509	1434.883401	1461.600512	3115.093321	1495.529141	1.059673373	3.11E-23	1.23E-21	Solyc10g076240_2	10	59177450	59186771	-	2412	protein_coding	NA && sp|A5H452|PER70_MAIZE Peroxidase 70 OS=Zea mays OX=4577 GN=PER70 PE=1 SV=1 && PF00141:Peroxidase	NAC
Solyc03g121360_1	894.2563451	910.7248091	871.8143163	382.6805126	378.4307872	393.1157435	892.2651568	384.7423478	1.212947472	3.23E-23	1.27E-21	Solyc03g121360_1	3	70958395	70959006	+	612	protein_coding	NA && sp|Q8LE58|CHM1A_ARATH ESCRT-related protein CHMP1A OS=Arabidopsis thaliana OX=3702 GN=CHMP1A PE=1 SV=1 && PF03357:Snf7	-
novel.644	269.423386	331.9599146	326.6458339	37.38832594	58.56666945	26.75990475	309.3430448	40.90496671	2.92629559	4.69E-23	1.85E-21	-	3	61466979	61471067	-	4089	-	- && - && -	-
Solyc04g011670_3	77.38756833	96.70136642	71.70274403	416.4033164	350.649162	405.8585553	81.93055959	390.9703445	-2.260008059	4.78E-23	1.88E-21	Solyc04g011670_3	4	4149532	4155300	+	1651	protein_coding	NA && sp|P14232|TGA1A_TOBAC TGACG-sequence-specific DNA-binding protein TGA-1A OS=Nicotiana tabacum OX=4097 GN=TGA1A PE=1 SV=1 && PF00170:bZIP transcription factor|PF14144:Seed dormancy control	bZIP
Solyc03g083900_3	452.860585	450.3108406	380.1383572	109.9656645	93.10598733	115.9595872	427.7699276	106.3437464	2.005167999	4.91E-23	1.93E-21	Solyc03g083900_3	3	55252966	55256897	-	2148	protein_coding	NA && sp|Q8VXX5|SKS1_ARATH Monocopper oxidase-like protein SKS1 OS=Arabidopsis thaliana OX=3702 GN=SKS1 PE=2 SV=1 && PF07732:Multicopper oxidase|PF00394:Multicopper oxidase|PF07731:Multicopper oxidase	bHLH
Solyc07g052980_3	580.4067625	652.3733973	778.4869352	159.8167658	142.6623999	224.2734874	670.422365	175.5842177	1.931325602	5.27E-23	2.06E-21	Solyc07g052980_3	7	61528033	61529822	+	1228	protein_coding	NA && sp|Q8LDW9|XTH9_ARATH Xyloglucan endotransglucosylase/hydrolase protein 9 OS=Arabidopsis thaliana OX=3702 GN=XTH9 PE=2 SV=2 && PF00722:Glycosyl hydrolases family 16|PF06955:Xyloglucan endo-transglycosylase (XET) C-terminus	GRAS
Solyc08g074710_1	141.8772086	116.9076221	155.9250148	4.398626581	1.501709473	3.822843535	138.2366152	3.241059863	5.403434481	5.73E-23	2.23E-21	Solyc08g074710_1	8	58978798	58979144	+	210	protein_coding	NA && - && -	-
Solyc03g007770_3	773.8756833	750.5180677	927.5831172	320.366636	306.3487325	267.5990475	817.3256227	298.1048053	1.45768897	7.05E-23	2.74E-21	Solyc03g007770_3	3	2317035	2321125	+	2793	protein_coding	NA && sp|Q9FLV9|SLAH3_ARATH S-type anion channel SLAH3 OS=Arabidopsis thaliana OX=3702 GN=SLAH3 PE=1 SV=1 && PF03595:Voltage-dependent anion channel	GRF
Solyc03g079880_3	977.3763259	978.560096	904.8203413	184.7423164	357.4068546	257.404798	953.5855878	266.5179897	1.839463118	7.19E-23	2.79E-21	Solyc03g079880_3	3	53115021	53115694	+	576	protein_coding	NA && - && PF14368:Probable lipid transfer	-
Solyc08g079490_3	80.25377456	64.94867894	95.60365871	522.7034587	494.0624166	325.5788411	80.26870407	447.4482388	-2.471317689	7.29E-23	2.83E-21	Solyc08g079490_3	8	63121341	63124974	-	1273	protein_coding	NA && sp|B5XAM2|ICT1_SALSA Peptidyl-tRNA hydrolase ICT1, mitochondrial OS=Salmo salar OX=8030 GN=mrpl58 PE=2 SV=1 && PF00472:RF-1 domain	-
Solyc03g120720_3	862.7280765	710.1055564	803.5259887	311.5693828	255.2906104	299.4560769	792.1198739	288.7720234	1.455420427	8.93E-23	3.45E-21	Solyc03g120720_3	3	70493489	70503935	+	3089	protein_coding	NA && sp|Q66GQ3|PDI16_ARATH Protein disulfide isomerase-like 1-6 OS=Arabidopsis thaliana OX=3702 GN=PDIL1-6 PE=2 SV=1 && PF13848:Thioredoxin-like domain|PF00085:Thioredoxin	C3H
Solyc02g085010_1	313.8495827	356.4960822	277.7058658	932.5088352	776.3837976	869.0597637	316.0171769	859.3174655	-1.446590063	1.44E-22	5.55E-21	Solyc02g085010_1	2	48681105	48681470	-	366	protein_coding	NA && - && -	-
Solyc03g115950_3	355.4095731	372.3724259	264.0482002	19.06071519	57.06495997	25.48562357	330.6100664	33.87043291	3.291494688	1.95E-22	7.49E-21	Solyc03g115950_3	3	67010679	67012444	+	1571	protein_coding	NA && - && -	-
Solyc06g073245_1	922.9184075	639.3836616	450.7029625	159.0836614	147.1675284	135.0738049	671.0016772	147.1083315	2.188135692	2.10E-22	8.03E-21	Solyc06g073245_1	6	45277008	45277784	-	648	protein_coding	NA && sp|Q9SRR7|CML3_ARATH Calmodulin-like protein 3 OS=Arabidopsis thaliana OX=3702 GN=CML3 PE=2 SV=1 && PF13499:EF-hand domain pair	FAR1
Solyc05g006390_1	1552.050676	1740.624596	1610.466394	893.6543004	714.8137092	753.1001764	1634.380555	787.1893953	1.053970964	2.10E-22	8.05E-21	Solyc05g006390_1	5	1028809	1029063	-	255	protein_coding	NA && - && -	-
Solyc06g060120_3	150.4758273	239.5884601	191.2073174	649.5305252	705.8034523	625.6720586	193.7572016	660.3353454	-1.769313968	2.18E-22	8.32E-21	Solyc06g060120_3	6	38167912	38186514	-	3164	protein_coding	NA && sp|Q9XI07|SWI3C_ARATH SWI/SNF complex subunit SWI3C OS=Arabidopsis thaliana OX=3702 GN=SWI3C PE=1 SV=1 && PF16495:SWIRM-associated region 1|PF00249:Myb-like DNA-binding domain|PF04433:SWIRM domain	MYB_related
Solyc10g049970_2	154.7751367	241.0317641	307.2974744	767.5603384	907.7833764	1010.504974	234.368125	895.2828964	-1.927657832	2.19E-22	8.33E-21	Solyc10g049970_2	10	47206486	47208385	+	1081	protein_coding	NA && sp|Q94LA9|CYL3_ARATH Cyclase-like protein 3 OS=Arabidopsis thaliana OX=3702 GN=CYCLASE3 PE=2 SV=1 && PF04199:Putative cyclase	-
Solyc10g081720_2	696.4881149	604.7443661	608.9042549	230.1947911	186.2119747	221.724925	636.7122453	212.7105636	1.580514742	2.36E-22	8.98E-21	Solyc10g081720_2	10	62866745	62870678	+	1980	protein_coding	NA && sp|Q66GR0|FLA17_ARATH Fasciclin-like arabinogalactan protein 17 OS=Arabidopsis thaliana OX=3702 GN=FLA17 PE=2 SV=1 && PF02469:Fasciclin domain	-
Solyc01g107100_3	580.4067625	607.6309741	710.1986075	1253.608576	1527.238534	1462.874793	632.745448	1414.573968	-1.158214262	3.71E-22	1.41E-20	Solyc01g107100_3	1	94627063	94627719	+	657	protein_coding	NA && - && -	-
Solyc09g010640_2	871.3266952	990.1065278	911.6491741	370.9508417	302.5944588	401.3985712	924.3607991	358.3146239	1.365737867	4.12E-22	1.56E-20	Solyc09g010640_2	9	3969591	3971704	-	2036	protein_coding	NA && - && -	WOX
Solyc07g066260_3	663.5267432	620.6207099	752.3097429	175.9450633	251.5363367	166.2936938	678.8190653	197.9250313	1.781002171	4.55E-22	1.72E-20	Solyc07g066260_3	7	67874218	67878698	-	2484	protein_coding	NA && sp|Q9SA22|P2C06_ARATH Probable protein phosphatase 2C 6 OS=Arabidopsis thaliana OX=3702 GN=At1g16220 PE=2 SV=1 && PF00481:Protein phosphatase 2C	B3
Solyc03g117420_3	696.4881149	535.4657752	637.3577247	1255.807889	1508.467166	1514.483181	623.1038716	1426.252745	-1.194312264	4.84E-22	1.82E-20	Solyc03g117420_3	3	68033366	68053906	-	7225	protein_coding	NA && sp|Q94AI7|TPL_ARATH Protein TOPLESS OS=Arabidopsis thaliana OX=3702 GN=TPL PE=1 SV=1 && PF13855:Leucine rich repeat	LSD
Solyc07g041750_3	740.9143116	956.9105364	962.8654198	243.3906708	352.1508714	289.2618275	886.8967559	294.9344566	1.589497731	5.20E-22	1.95E-20	Solyc07g041750_3	7	54201877	54214825	-	2739	protein_coding	NA && sp|Q94BY4|OFT35_ARATH O-fucosyltransferase 35 OS=Arabidopsis thaliana OX=3702 GN=OFUT35 PE=2 SV=1 && PF10250:GDP-fucose protein O-fucosyltransferase	MIKC_MADS
Solyc02g080220_3	233.5958081	288.6607953	373.3095245	1013.883427	967.8517554	805.3457047	298.5220426	929.0269624	-1.632156421	5.91E-22	2.22E-20	Solyc02g080220_3	2	45052132	45054042	+	1786	protein_coding	NA && sp|Q1JPL7|PME18_ARATH Pectinesterase/pectinesterase inhibitor 18 OS=Arabidopsis thaliana OX=3702 GN=PME18 PE=1 SV=3 && PF04043:Plant invertase/pectin methylesterase inhibitor|PF01095:Pectinesterase	NAC
Solyc03g005750_3	349.6771606	267.0112356	303.883058	928.8433131	807.1688418	777.3115188	306.8571514	837.7745579	-1.448888922	7.59E-22	2.84E-20	Solyc03g005750_3	3	525187	537712	+	3119	protein_coding	NA && - && PF06972:Protein of unknown function (DUF1296)	-
Solyc09g007520_3	309.5502733	528.2492554	408.5918271	1041.008291	1424.371435	1330.986691	415.4637853	1265.455472	-1.607328824	7.90E-22	2.95E-20	Solyc09g007520_3	9	1092996	1099542	-	1513	protein_coding	NA && sp|Q42580|PER21_ARATH Peroxidase 21 OS=Arabidopsis thaliana OX=3702 GN=PER21 PE=1 SV=1 && PF00141:Peroxidase	NAC
Solyc06g053310_3	537.4136689	572.9916786	375.5858021	1175.166402	1356.794509	1333.535253	495.3303832	1288.498721	-1.383768478	8.82E-22	3.27E-20	Solyc06g053310_3	6	36142345	36151320	+	1499	protein_coding	NA && sp|Q8LDW8|GLO2D_ARATH Probable hydroxyacylglutathione hydrolase 2, chloroplastic OS=Arabidopsis thaliana OX=3702 GN=GLX2-4 PE=2 SV=1 && PF16123:Hydroxyacylglutathione hydrolase C-terminus|PF00753:Metallo-beta-lactamase superfamily	-
Solyc02g077010_2	237.8951174	199.1759487	187.792901	27.85796835	24.02735157	26.12276416	208.2879891	26.00269469	3.000349526	1.23E-21	4.55E-20	Solyc02g077010_2	2	42640502	42663706	+	4944	protein_coding	NA && sp|A2WT95|PLA1_ORYSI Phospholipase A1-II 1 OS=Oryza sativa subsp. indica OX=39946 GN=OsI_03083 PE=3 SV=2 && PF01764:Lipase (class 3)	Trihelix
Solyc09g064860_3	384.0716354	471.9604003	414.2825211	1084.261452	988.1248333	941.0566502	423.4381856	1004.480979	-1.246616896	1.37E-21	5.05E-20	Solyc09g064860_3	9	62571662	62594210	-	5723	protein_coding	NA && sp|Q67XQ0|Y4424_ARATH DUF21 domain-containing protein At4g14240 OS=Arabidopsis thaliana OX=3702 GN=CBSDUF1 PE=1 SV=1 && PF01595:Cyclin M transmembrane N-terminal domain	C2H2
Solyc01g109110_3	2035.006426	2081.244334	2134.010239	876.7928985	1190.855612	900.2796525	2083.420333	989.3093877	1.07529159	1.44E-21	5.30E-20	Solyc01g109110_3	1	96057922	96063695	-	4156	protein_coding	NA && sp|O80462|XLG1_ARATH Extra-large guanine nucleotide-binding protein 1 OS=Arabidopsis thaliana OX=3702 GN=XLG1 PE=1 SV=2 && PF00503:G-protein alpha subunit	B3
Solyc02g077470_3	267.9902829	329.0733066	340.3034994	68.17871201	63.8226526	54.79409067	312.4556963	62.26515176	2.330181165	1.46E-21	5.36E-20	Solyc02g077470_3	2	42965223	42973203	-	1000	protein_coding	NA && sp|Q9P7W0|OPA3_SCHPO OPA3-like protein OS=Schizosaccharomyces pombe (strain 972 / ATCC 24843) OX=284812 GN=SPBC1703.11 PE=3 SV=1 && PF07047:Optic atrophy 3 protein (OPA3)	VOZ
Solyc11g006030_1	316.7157889	333.4032186	245.8379795	43.25316138	63.07179787	45.23698183	298.652329	50.52064703	2.564122669	1.47E-21	5.41E-20	Solyc11g006030_1	11	840437	841729	-	1293	protein_coding	NA && sp|Q5PNY6|PUB21_ARATH U-box domain-containing protein 21 OS=Arabidopsis thaliana OX=3702 GN=PUB21 PE=2 SV=1 && PF04564:U-box domain	Dof
Solyc02g071510_3	227.8633956	147.2170056	228.7658976	670.7905537	661.5030229	666.4490563	201.2820996	666.2475443	-1.722892284	1.49E-21	5.46E-20	Solyc02g071510_3	2	41479308	41484446	-	2075	protein_coding	NA && sp|Q9LK27|GTE8_ARATH Transcription factor GTE8 OS=Arabidopsis thaliana OX=3702 GN=GTE8 PE=2 SV=2 && PF00439:Bromodomain	bHLH
Solyc06g066770_1	121.813765	193.4027328	151.3724596	663.4595093	516.5880587	564.506562	155.5296525	581.5180434	-1.903599763	1.75E-21	6.39E-20	Solyc06g066770_1	6	42066084	42067187	-	1104	protein_coding	NA && sp|Q9M8L2|FBK30_ARATH F-box/kelch-repeat protein At1g80440 OS=Arabidopsis thaliana OX=3702 GN=At1g80440 PE=2 SV=1 && PF01344:Kelch motif	bHLH
Solyc07g018010_3	318.148892	300.2072271	221.9370649	45.45247467	15.01709473	24.21134239	280.097728	28.2269706	3.310407182	1.99E-21	7.26E-20	Solyc07g018010_3	7	8842074	8845587	-	1132	protein_coding	NA && sp|Q2HIV9|BH035_ARATH Transcription factor bHLH35 OS=Arabidopsis thaliana OX=3702 GN=BHLH35 PE=2 SV=1 && PF00010:Helix-loop-helix DNA-binding domain	bHLH
Solyc06g005560_3	67.35584651	86.59823858	91.05110353	453.7916423	333.379503	382.2843535	81.66839621	389.8184996	-2.250782367	2.30E-21	8.37E-20	Solyc06g005560_3	6	586970	595641	-	6662	protein_coding	NA && sp|Q38865|EXPA6_ARATH Expansin-A6 OS=Arabidopsis thaliana OX=3702 GN=EXPA6 PE=2 SV=2 && -	bZIP
Solyc11g045130_2	1206.672825	1223.921772	1352.108887	638.5339587	551.1273766	480.4040042	1260.901161	556.6884465	1.181263285	2.50E-21	9.06E-20	Solyc11g045130_2	11	31933065	31936650	-	1338	protein_coding	NA && sp|Q9SKZ2|CAF1G_ARATH Probable CCR4-associated factor 1 homolog 7 OS=Arabidopsis thaliana OX=3702 GN=CAF1-7 PE=2 SV=2 && PF04857:CAF1 family ribonuclease	-
Solyc12g045020_2	25.79585611	25.97947158	13.65766553	252.187924	264.3008673	182.8593491	21.81099774	233.1160468	-3.438250394	2.72E-21	9.85E-20	Solyc12g045020_2	12	61343823	61345877	+	1713	protein_coding	NA && sp|A0A068Q5V6|C7150_PRUMU Cytochrome P450 71AU50 OS=Prunus mume OX=102107 GN=CYP71AU50 PE=2 SV=1 && PF00067:Cytochrome P450	MYB
Solyc10g055200_1	1408.740364	1278.767323	1239.433147	77.7090696	27.78162525	87.28826072	1308.980278	64.25965186	4.346227664	3.02E-21	1.09E-19	Solyc10g055200_1	10	56431129	56431713	+	585	protein_coding	NA && sp|Q9SS03|DIR21_ARATH Dirigent protein 21 OS=Arabidopsis thaliana OX=3702 GN=DIR21 PE=3 SV=1 && PF03018:Dirigent-like protein	B3
Solyc02g089680_3	786.7736113	801.0337069	800.1115723	244.8568797	346.8948883	266.9619069	795.9729635	286.2378916	1.476514441	3.14E-21	1.13E-19	Solyc02g089680_3	2	52071657	52074435	+	1311	protein_coding	NA && sp|Q9LFT0|TBL19_ARATH Protein trichome birefringence-like 19 OS=Arabidopsis thaliana OX=3702 GN=TBL19 PE=3 SV=1 && PF14416:PMR5 N terminal Domain|PF13839:GDSL/SGNH-like Acyl-Esterase family found in Pmr5 and Cas1p	bZIP
Solyc07g007760_3	697.9212181	975.6734881	589.5558954	3298.236832	3122.804849	3144.288808	754.3835338	3188.443496	-2.080683122	4.00E-21	1.44E-19	Solyc07g007760_3	7	2394864	2395702	-	336	protein_coding	NA && sp|P20346|DF322_SOLTU Defensin-like protein P322 OS=Solanum tuberosum OX=4113 PE=2 SV=1 && -	-
Solyc02g069960_3	17.19723741	34.63929543	11.38138794	206.7354493	235.7683873	295.6332334	21.07264026	246.04569	-3.571659477	4.10E-21	1.47E-19	Solyc02g069960_3	2	40305536	40308744	-	855	protein_coding	NA && sp|Q9SK55|NAC42_ARATH Transcription factor JUNGBRUNNEN 1 OS=Arabidopsis thaliana OX=3702 GN=JUB1 PE=1 SV=1 && PF02365:No apical meristem (NAM) protein	NAC
Solyc03g026020_3	604.7695154	613.40419	449.5648237	1354.043883	1310.99237	1208.655698	555.912843	1291.23065	-1.219492042	4.49E-21	1.61E-19	Solyc03g026020_3	3	3455736	3457566	+	1633	protein_coding	NA && sp|Q9SCW4|HFB2A_ARATH Heat stress transcription factor B-2a OS=Arabidopsis thaliana OX=3702 GN=HSFB2A PE=2 SV=1 && PF00447:HSF-type DNA-binding	HSF
Solyc02g024050_3	461.4592037	518.1461275	472.3275996	1004.353069	1051.947486	1072.307612	483.9776436	1042.869389	-1.108394526	4.49E-21	1.61E-19	Solyc02g024050_3	2	25345784	25351499	+	1583	protein_coding	NA && sp|O04397|FENR2_TOBAC Ferredoxin--NADP reductase, root-type isozyme, chloroplastic OS=Nicotiana tabacum OX=4097 PE=2 SV=1 && PF00175:Oxidoreductase NAD-binding domain	NAC
Solyc01g091910_3	557.4771126	477.7336162	374.4476633	134.1581107	107.3722273	113.4110249	469.8861307	118.3137876	1.987951229	4.53E-21	1.62E-19	Solyc01g091910_3	1	85312254	85326068	-	6069	protein_coding	NA && sp|P93733|PLDB1_ARATH Phospholipase D beta 1 OS=Arabidopsis thaliana OX=3702 GN=PLDBETA1 PE=1 SV=4 && PF03634:TCP family transcription factor	TALE
Solyc02g081890_3	583.2729687	385.3621617	478.0182935	1345.246629	1345.531688	1085.050423	482.217808	1258.60958	-1.383727235	4.66E-21	1.66E-19	Solyc02g081890_3	2	46214113	46220943	-	2540	protein_coding	NA && sp|Q9FLD7|GT14A_ARATH Beta-glucuronosyltransferase GlcAT14A OS=Arabidopsis thaliana OX=3702 GN=GLCAT14A PE=2 SV=1 && PF03473:MOSC domain|PF03476:MOSC N-terminal beta barrel domain|PF02485:Core-2/I-Branching enzyme	Dof
Solyc01g091520_3	107.4827338	57.73215906	81.94599318	384.8798259	386.6901893	421.1499295	82.38696201	397.5733149	-2.270796495	4.72E-21	1.68E-19	Solyc01g091520_3	1	85019469	85020215	+	747	protein_coding	NA && sp|O04469|ECI1_ARATH Enoyl-CoA delta isomerase 1, peroxisomal OS=Arabidopsis thaliana OX=3702 GN=ECI1 PE=1 SV=1 && PF00378:Enoyl-CoA hydratase/isomerase	WRKY
Solyc12g017910_2	510.1847097	434.4344969	390.3816064	1048.339335	1245.668008	1000.947866	445.000271	1098.318403	-1.305671866	4.89E-21	1.74E-19	Solyc12g017910_2	12	7756889	7765268	-	2986	protein_coding	NA && sp|Q9LD18|POT4_ARATH Potassium transporter 4 OS=Arabidopsis thaliana OX=3702 GN=POT4 PE=1 SV=2 && PF02705:K+ potassium transporter	NF-X1
Solyc06g082780_3	586.1391749	405.5684174	343.7179158	68.91181644	103.6179536	93.65966661	445.141836	88.72981223	2.324747821	4.93E-21	1.75E-19	Solyc06g082780_3	6	48505872	48509628	-	1472	protein_coding	NA && sp|F4I111|MCU6_ARATH Calcium uniporter protein 6, mitochondrial OS=Arabidopsis thaliana OX=3702 GN=At1g09575 PE=2 SV=1 && PF04678:Mitochondrial calcium uniporter	GRAS
Solyc08g077480_3	61.62343404	47.62903122	15.93394312	324.0321582	364.1645472	366.9929794	41.72880279	351.7298949	-3.09924882	5.25E-21	1.86E-19	Solyc08g077480_3	8	61554348	61555982	+	908	protein_coding	NA && sp|Q8VZM9|FLZ2_ARATH FCS-Like Zinc finger 2 OS=Arabidopsis thaliana OX=3702 GN=FLZ2 PE=1 SV=1 && PF04570:zinc-finger of the FCS-type, C2-C2	-
Solyc10g081000_1	237.8951174	186.186213	165.0301252	657.5946739	565.3936166	670.9090404	196.3704852	631.2991103	-1.689480001	7.67E-21	2.72E-19	Solyc10g081000_1	10	62313828	62314280	+	453	protein_coding	NA && - && -	bHLH
Solyc07g017980_1	179.1378896	256.9081078	371.0332469	23.45934177	24.7782063	40.13985712	269.0264148	29.45913506	3.18705534	1.07E-20	3.78E-19	Solyc07g017980_1	7	8725058	8725426	+	369	protein_coding	NA && - && -	-
Solyc03g082450_3	530.2481534	396.9085935	264.0482002	82.10769618	63.07179787	61.80263715	397.0683157	68.99404373	2.523468768	1.12E-20	3.97E-19	Solyc03g082450_3	3	53814277	53820025	+	5622	protein_coding	NA && sp|C0LGQ5|GSO1_ARATH LRR receptor-like serine/threonine-protein kinase GSO1 OS=Arabidopsis thaliana OX=3702 GN=GSO1 PE=1 SV=1 && -	MYB_related
Solyc10g083400_1	28.66206234	18.76295169	6.828832765	346.0252911	242.5260799	181.5850679	18.0846156	256.7121463	-3.859505969	1.19E-20	4.19E-19	Solyc10g083400_1	10	63345797	63347290	-	1494	protein_coding	NA && sp|Q9ZUX1|C94C1_ARATH Cytochrome P450 94C1 OS=Arabidopsis thaliana OX=3702 GN=CYP94C1 PE=1 SV=1 && PF00067:Cytochrome P450	C2H2
Solyc04g083140_2	11.46482494	8.659823858	18.21022071	199.404405	171.9457347	189.8678956	12.77828983	187.0726784	-3.84353104	1.47E-20	5.16E-19	Solyc04g083140_2	4	54592891	54594652	+	1676	protein_coding	NA && sp|A6YIH8|C7D55_HYOMU Premnaspirodiene oxygenase OS=Hyoscyamus muticus OX=35626 GN=CYP71D55 PE=1 SV=1 && PF00067:Cytochrome P450	E2F/DP
Solyc04g007620_1	266.5571798	369.485818	227.6277588	49.11799682	21.02393262	36.95415417	287.8902522	35.69869454	3.008272674	1.57E-20	5.51E-19	Solyc04g007620_1	4	1301143	1301592	+	450	protein_coding	NA && - && -	-
Solyc05g054620_3	48.72550598	63.50537496	31.86788624	296.1741898	278.5671072	489.3239725	48.03292239	354.6884232	-2.898210647	1.59E-20	5.56E-19	Solyc05g054620_3	5	65341493	65347080	+	3051	protein_coding	NA && sp|O80644|ACR9_ARATH ACT domain-containing protein ACR9 OS=Arabidopsis thaliana OX=3702 GN=ACR9 PE=2 SV=1 && -	-
Solyc04g072900_1	743.7805178	562.8885508	690.850248	1347.445943	1404.849212	1540.605945	665.8397722	1430.967033	-1.103174914	1.61E-20	5.63E-19	Solyc04g072900_1	4	59953856	59954650	+	795	protein_coding	NA && sp|Q8H1E4|RAP24_ARATH Ethylene-responsive transcription factor RAP2-4 OS=Arabidopsis thaliana OX=3702 GN=RAP2-4 PE=1 SV=1 && PF00847:AP2 domain	ERF
Solyc03g114860_3	346.8109544	352.1661702	293.6398089	55.7159367	76.58718312	37.59129476	330.8723112	56.63147153	2.551260664	1.66E-20	5.78E-19	Solyc03g114860_3	3	66233972	66235616	-	1376	protein_coding	NA && sp|Q8RU27|RGP2_SOLTU Probable UDP-arabinopyranose mutase 2 OS=Solanum tuberosum OX=4113 GN=UPTG2 PE=1 SV=1 && PF03214:Reversibly glycosylated polypeptide	-
Solyc02g078040_3	753.8122396	812.5801387	820.5980706	198.6713006	244.7786441	327.4902628	795.663483	256.9800692	1.628509167	1.76E-20	6.11E-19	Solyc02g078040_3	2	43420458	43426490	-	1042	protein_coding	NA && sp|P93013|AGP30_ARATH Non-classical arabinogalactan protein 30 OS=Arabidopsis thaliana OX=3702 GN=AGP30 PE=2 SV=1 && PF01190:Pollen proteins Ole e I like	MIKC_MADS
Solyc01g091620_3	428.497832	291.5474032	374.4476633	909.7825979	998.6367996	923.2167137	364.8309662	943.8787037	-1.370505084	1.87E-20	6.49E-19	Solyc01g091620_3	1	85072388	85076647	-	2091	protein_coding	NA && sp|Q96287|KSG8_ARATH Shaggy-related protein kinase theta OS=Arabidopsis thaliana OX=3702 GN=ASK8 PE=2 SV=3 && PF00069:Protein kinase domain	HD-ZIP
Solyc06g068960_1	247.9268393	178.9696931	188.9310398	24.1924462	9.010256838	21.66278003	205.2758574	18.28849436	3.48200233	1.94E-20	6.69E-19	Solyc06g068960_1	6	42898782	42899246	+	465	protein_coding	NA && sp|Q9M7R0|ALL8_OLEEU Calcium-binding allergen Ole e 8 OS=Olea europaea OX=4146 PE=1 SV=1 && PF13499:EF-hand domain pair	HSF
Solyc02g062500_3	267.9902829	281.4442754	248.1142571	52.78351898	54.06154103	44.59984124	265.8496051	50.48163375	2.398211474	1.99E-20	6.87E-19	Solyc02g062500_3	2	34717968	34722274	+	1651	protein_coding	NA && sp|Q945B6|AOP1L_ARATH Probable 2-oxoglutarate-dependent dioxygenase AOP1.2 OS=Arabidopsis thaliana OX=3702 GN=AOP1.2 PE=2 SV=1 && PF03171:2OG-Fe(II) oxygenase superfamily|PF14226:non-haem dioxygenase in morphine synthesis N-terminal	Dof
Solyc02g082760_3	531.6812565	587.4247184	515.5768737	1076.930408	1326.760319	1171.701544	544.8942829	1191.797424	-1.130219152	2.30E-20	7.93E-19	Solyc02g082760_3	2	46957638	46962227	-	2114	protein_coding	NA && sp|Q9XHH3|CATA2_SOLLC Catalase isozyme 2 OS=Solanum lycopersicum OX=4081 GN=CAT2 PE=2 SV=1 && PF06628:Catalase-related immune-responsive|PF00199:Catalase	Nin-like
Solyc01g009100_3	683.5901869	574.4349826	660.1205006	220.6644335	226.0072757	252.9448139	639.38189	233.2055077	1.454554144	2.39E-20	8.22E-19	Solyc01g009100_3	1	3046068	3049607	+	1153	protein_coding	NA && sp|O49884|RL30_LUPLU 60S ribosomal protein L30 OS=Lupinus luteus OX=3873 GN=RPL30 PE=3 SV=1 && PF01248:Ribosomal protein L7Ae/L30e/S12e/Gadd45 family	-
Solyc03g082530_1	553.1778032	500.8264798	459.8080728	137.8236329	66.82607155	54.15695008	504.6041186	86.26888484	2.550869728	2.48E-20	8.50E-19	Solyc03g082530_1	3	53889170	53889538	-	369	protein_coding	NA && sp|Q9ZUZ3|SAU32_ARATH Auxin-responsive protein SAUR32 OS=Arabidopsis thaliana OX=3702 GN=SAUR32 PE=2 SV=1 && PF02519:Auxin responsive protein	ZF-HD
Solyc10g005950_3	227.8633956	277.1143635	256.0812287	21.26002848	40.54615577	42.68841948	253.6863293	34.83153457	2.861200623	2.68E-20	9.17E-19	Solyc10g005950_3	10	725096	731696	+	1573	protein_coding	NA && sp|Q94B74|NUDT2_ARATH Nudix hydrolase 2 OS=Arabidopsis thaliana OX=3702 GN=NUDT2 PE=1 SV=1 && PF00293:NUDIX domain|PF18290:Nudix hydrolase domain	C3H
Solyc10g051010_2	143.3103117	138.5571817	112.6757406	457.4571645	554.1307955	430.7070383	131.5144114	480.7649994	-1.874321976	2.88E-20	9.83E-19	Solyc10g051010_2	10	51281956	51298989	-	4257	protein_coding	NA && sp|H2DH21|C7A29_PANGI Cytochrome P450 CYP72A219 OS=Panax ginseng OX=4054 PE=2 SV=1 && PF05699:hAT family C-terminal dimerisation region|PF04784:Protein of unknown function, DUF547|PF13041:PPR repeat family|PF14389:Leucine-zipper of ternary complex factor MIP1|PF00067:Cytochrome P450	bHLH
Solyc10g083860_2	133.2785899	137.1138778	103.5706303	442.0619714	476.7927577	430.7070383	124.654366	449.8539225	-1.857269248	3.14E-20	1.07E-18	Solyc10g083860_2	10	63718039	63726003	-	2168	protein_coding	NA && sp|Q9ZQ94|U73C5_ARATH UDP-glycosyltransferase 73C5 OS=Arabidopsis thaliana OX=3702 GN=UGT73C5 PE=2 SV=1 && PF00023:Ankyrin repeat|PF12796:Ankyrin repeats (3 copies)|PF00201:UDP-glucoronosyl and UDP-glucosyl transferase	ERF
Solyc05g054480_3	173.4054772	226.5987243	347.1323322	16.12829746	32.28675367	9.557108838	249.0455112	19.32405332	3.701803966	3.18E-20	1.08E-18	Solyc05g054480_3	5	65244837	65254589	-	2356	protein_coding	NA && sp|P30167|ACT3_SOLTU Actin-58 OS=Solanum tuberosum OX=4113 GN=AC58 PE=3 SV=1 && PF00022:Actin	Trihelix
Solyc09g056360_3	401.2688728	204.9491647	452.9792401	26.39175949	49.55641261	54.79409067	353.0657592	43.58075426	3.016880422	3.32E-20	1.12E-18	Solyc09g056360_3	9	49074611	49076845	+	1662	protein_coding	NA && sp|Q9LSE7|B561C_ARATH Cytochrome b561 and DOMON domain-containing protein At3g25290 OS=Arabidopsis thaliana OX=3702 GN=At3g25290 PE=2 SV=1 && PF04526:Protein of unknown function (DUF568)|PF03188:Eukaryotic cytochrome b561	bZIP
Solyc01g107900_3	80.25377456	63.50537496	93.32738112	335.761829	370.9222398	366.3558388	79.02884355	357.6799692	-2.171078157	3.47E-20	1.18E-18	Solyc01g107900_3	1	95179613	95185077	-	2217	protein_coding	NA && sp|Q5KS41|WSD11_ARATH Wax ester synthase/diacylglycerol acyltransferase 11 OS=Arabidopsis thaliana OX=3702 GN=WSD11 PE=1 SV=1 && PF06974:Protein of unknown function (DUF1298)|PF03007:Wax ester synthase-like Acyl-CoA acyltransferase domain	-
Solyc09g074520_3	77.38756833	66.39198291	136.5766553	477.9840885	409.9666861	519.9067208	93.45206885	469.2858318	-2.314659688	3.74E-20	1.26E-18	Solyc09g074520_3	9	66755672	66759654	+	2326	protein_coding	NA && sp|Q570C0|TIR1_ARATH Protein TRANSPORT INHIBITOR RESPONSE 1 OS=Arabidopsis thaliana OX=3702 GN=TIR1 PE=1 SV=2 && PF18511:F-box|PF18791:Transport inhibitor response 1 protein domain	FAR1
Solyc06g072840_3	8.598618703	46.18572725	15.93394312	317.4342183	250.0346273	280.9789998	23.57276302	282.8159485	-3.600885402	4.20E-20	1.42E-18	Solyc06g072840_3	6	45059572	45060952	-	1257	protein_coding	NA && sp|F4KFM8|LEA65_ARATH Late embryogenesis abundant protein At5g17165 OS=Arabidopsis thaliana OX=3702 GN=At5g17165 PE=3 SV=1 && -	-
Solyc03g044097_1	596.1708967	679.7961729	541.754066	189.8740474	199.7273599	230.6448933	605.9070452	206.7487669	1.548620038	4.81E-20	1.62E-18	Solyc03g044097_1	3	8111399	8114534	-	1581	protein_coding	NA && sp|Q9SZE7|PER51_ARATH Peroxidase 51 OS=Arabidopsis thaliana OX=3702 GN=PER51 PE=2 SV=1 && PF00141:Peroxidase	NAC
Solyc03g082720_3	169.1061678	282.8875794	225.3514812	708.911984	755.3598649	667.7233375	225.7817428	710.6650621	-1.654269629	5.19E-20	1.74E-18	Solyc03g082720_3	3	54056787	54059828	+	929	protein_coding	NA && sp|Q2V3E2|YIPL5_ARATH Protein yippee-like At4g27740 OS=Arabidopsis thaliana OX=3702 GN=At4g27740 PE=3 SV=1 && PF03226:Yippee zinc-binding/DNA-binding /Mis18, centromere assembly	WRKY
Solyc06g009270_3	617.6674435	591.7546303	558.8261479	216.9989113	126.1435957	155.4623038	589.4160739	166.2016036	1.826097138	7.32E-20	2.46E-18	Solyc06g009270_3	6	3225166	3235341	-	1950	protein_coding	NA && sp|F4JQ95|DGK7_ARATH Diacylglycerol kinase 7 OS=Arabidopsis thaliana OX=3702 GN=DGK7 PE=1 SV=1 && PF00609:Diacylglycerol kinase accessory domain|PF00781:Diacylglycerol kinase catalytic domain	-
Solyc09g090210_3	405.5681822	471.9604003	432.4927418	136.357424	78.0888926	96.84536956	436.6737747	103.7638954	2.073391754	8.17E-20	2.74E-18	Solyc09g090210_3	9	70242421	70245242	-	1492	protein_coding	NA && sp|P93749|Y2197_ARATH Probable protein kinase At2g41970 OS=Arabidopsis thaliana OX=3702 GN=At2g41970 PE=2 SV=1 && PF07714:Protein tyrosine kinase	GRAS
Solyc12g056980_1	0	5.773215906	4.552555177	158.3505569	250.785482	148.4537573	3.441923694	185.8632654	-5.726940861	8.18E-20	2.74E-18	Solyc12g056980_1	12	64012226	64013239	+	924	protein_coding	NA && sp|Q8H1E4|RAP24_ARATH Ethylene-responsive transcription factor RAP2-4 OS=Arabidopsis thaliana OX=3702 GN=RAP2-4 PE=1 SV=1 && PF00847:AP2 domain	ERF
Solyc09g066010_3	48.72550598	25.97947158	25.03905347	269.7824303	265.051722	227.4591903	33.24801034	254.0977809	-2.945007271	1.02E-19	3.40E-18	Solyc09g066010_3	9	64517693	64520252	+	2085	protein_coding	NA && sp|O04336|WRK21_ARATH Probable WRKY transcription factor 21 OS=Arabidopsis thaliana OX=3702 GN=WRKY21 PE=1 SV=1 && PF03106:WRKY DNA -binding domain|PF10533:Plant zinc cluster domain	WRKY
Solyc04g081890_1	339.6454388	370.9291219	319.8170012	33.72280379	76.58718312	65.62548069	343.463854	58.64515587	2.548670731	1.12E-19	3.72E-18	Solyc04g081890_1	4	65839842	65840246	+	405	protein_coding	NA && sp|Q8L9W3|ATL23_ARATH E3 ubiquitin-protein ligase ATL23 OS=Arabidopsis thaliana OX=3702 GN=ATL23 PE=1 SV=2 && PF13639:Ring finger domain	WOX
Solyc07g049530_3	285.1875203	304.537139	257.2193675	60.11456328	51.80897682	33.13131064	282.3146756	48.35161691	2.549930403	1.12E-19	3.73E-18	ACO1	7	59957577	59960265	+	2036	protein_coding	NA && sp|P05116|ACCO1_SOLLC 1-aminocyclopropane-1-carboxylate oxidase 1 OS=Solanum lycopersicum OX=4081 GN=ACO1 PE=2 SV=2 && PF14226:non-haem dioxygenase in morphine synthesis N-terminal|PF03171:2OG-Fe(II) oxygenase superfamily	STAT
Solyc02g071950_1	230.7296019	200.6192527	138.8529329	580.6187087	788.3974733	632.6806051	190.0672625	667.2322624	-1.817940826	1.18E-19	3.94E-18	Solyc02g071950_1	2	41867289	41867591	+	303	protein_coding	NA && - && -	-
Solyc01g104910_3	68.78894962	33.19599146	84.22227077	330.630098	357.4068546	472.7583172	62.06907062	386.9317566	-2.628489569	1.32E-19	4.36E-18	Solyc01g104910_3	1	93119035	93123953	-	2887	protein_coding	NA && - && -	-
Solyc03g083680_1	419.8992133	350.7228663	324.3695563	79.17527846	85.59743996	101.9424943	364.997212	88.9050709	2.034197572	1.35E-19	4.45E-18	Solyc03g083680_1	3	55071897	55072211	+	315	protein_coding	NA && - && -	-
Solyc07g063620_3	166.2399616	241.0317641	113.8138794	4.398626581	15.01709473	3.822843535	173.6952017	7.746188282	4.503636966	1.43E-19	4.73E-18	Solyc07g063620_3	7	66175690	66178222	+	1366	protein_coding	NA && - && PF06764:Protein of unknown function (DUF1223)	-
Solyc01g096040_3	654.9281245	681.2394769	566.7931195	186.2085253	211.7410357	252.3076733	634.3202403	216.7524114	1.546294731	1.49E-19	4.90E-18	Solyc01g096040_3	1	87003119	87004564	-	1446	protein_coding	NA && sp|Q9LNJ3|APF2_ARATH Aspartyl protease family protein 2 OS=Arabidopsis thaliana OX=3702 GN=APF2 PE=2 SV=1 && PF14541:Xylanase inhibitor C-terminal|PF14543:Xylanase inhibitor N-terminal	Trihelix
Solyc10g075100_2	232.162705	264.1246277	234.4565916	8.797253163	27.03077051	34.40559182	243.5813081	23.41120516	3.37105962	1.66E-19	5.46E-18	Solyc10g075100_2	10	58868679	58869437	-	473	protein_coding	NA && sp|O24038|NLTP2_SOLPN Non-specific lipid-transfer protein 2 OS=Solanum pennellii OX=28526 GN=LTP2 PE=3 SV=1 && PF00234:Protease inhibitor/seed storage/LTP family	MYB_related
Solyc01g103430_3	293.786139	376.7023378	404.0392719	922.2453732	1010.650475	825.097063	358.1759163	919.3309705	-1.356649976	1.78E-19	5.80E-18	Solyc01g103430_3	1	91922387	91932323	+	2666	protein_coding	NA && sp|Q39019|KSG10_ARATH Shaggy-related protein kinase kappa OS=Arabidopsis thaliana OX=3702 GN=ASK10 PE=2 SV=2 && PF00069:Protein kinase domain	C3H
Solyc11g066130_1	478.6564411	548.455511	537.2015108	1300.527259	996.3842354	1318.88102	521.437821	1205.264171	-1.208622638	1.88E-19	6.14E-18	Solyc11g066130_1	11	52101254	52102012	+	759	protein_coding	NA && sp|Q41350|OLP1_SOLLC Osmotin-like protein OS=Solanum lycopersicum OX=4081 PE=1 SV=1 && PF00314:Thaumatin family	MYB
Solyc04g079880_3	246.4937362	174.6397811	302.7449192	36.65522151	17.26965894	30.58274828	241.2928122	28.16920958	3.097960395	1.89E-19	6.16E-18	Solyc04g079880_3	4	64283081	64286957	+	2015	protein_coding	NA && sp|Q8L4Y2|LPAT4_ARATH Probable 1-acyl-sn-glycerol-3-phosphate acyltransferase 4 OS=Arabidopsis thaliana OX=3702 GN=LPAT4 PE=2 SV=1 && PF16076:Acyltransferase C-terminus|PF01553:Acyltransferase	-
Solyc08g008280_3	556.0440095	600.4144542	628.2526144	185.4754208	241.0243704	194.9650203	594.9036927	207.1549372	1.523556294	1.92E-19	6.22E-18	Solyc08g008280_3	8	2699944	2702124	-	1759	protein_coding	NA && sp|Q9SUP6|WRK53_ARATH Probable WRKY transcription factor 53 OS=Arabidopsis thaliana OX=3702 GN=WRKY53 PE=1 SV=1 && PF03106:WRKY DNA -binding domain	WRKY
Solyc09g011570_3	571.8081437	886.1886415	821.7362094	266.1169082	235.7683873	263.1390633	759.9109982	255.0081196	1.575578923	2.03E-19	6.57E-18	Solyc09g011570_3	9	4857735	4866413	+	1083	protein_coding	NA && sp|P32111|GSTX1_SOLTU Probable glutathione S-transferase OS=Solanum tuberosum OX=4113 GN=PRP1 PE=2 SV=1 && PF00043:Glutathione S-transferase, C-terminal domain|PF02798:Glutathione S-transferase, N-terminal domain	-
Solyc07g066550_3	182.0040959	127.0107499	184.3784847	489.7137594	660.0013134	565.1437026	164.4644435	571.6195918	-1.793632438	2.07E-19	6.70E-18	Solyc07g066550_3	7	68066175	68073738	-	3612	protein_coding	NA && sp|C0LGH3|Y5614_ARATH Probable LRR receptor-like serine/threonine-protein kinase At1g56140 OS=Arabidopsis thaliana OX=3702 GN=At1g56140 PE=2 SV=2 && PF07714:Protein tyrosine kinase|PF13855:Leucine rich repeat|PF11721:Malectin domain	ERF
Solyc03g115740_2	1027.534935	1004.539568	940.102644	430.3323005	397.2021556	500.1553625	990.7257155	442.5632729	1.16068273	2.17E-19	7.02E-18	Solyc03g115740_2	3	66848562	66852709	-	2484	protein_coding	NA && sp|Q9CA75|XXT5_ARATH Probable xyloglucan 6-xylosyltransferase 5 OS=Arabidopsis thaliana OX=3702 GN=XXT5 PE=1 SV=1 && PF05637:galactosyl transferase GMA12/MNN10 family	-
Solyc08g076670_3	196.3351271	217.9389004	195.7598726	553.4938448	577.4072924	565.7808432	203.3446334	565.5606601	-1.47702137	2.21E-19	7.13E-18	Solyc08g076670_3	8	60720409	60723629	-	1222	protein_coding	NA && sp|Q8L586|Y4958_ARATH Uncharacterized membrane protein At4g09580 OS=Arabidopsis thaliana OX=3702 GN=At4g09580 PE=1 SV=1 && PF09335:SNARE associated Golgi protein	-
Solyc12g006550_2	385.5047385	432.9911929	381.276496	889.9887783	853.7218354	948.7023373	399.9241425	897.4709837	-1.167785086	2.22E-19	7.16E-18	Solyc12g006550_2	12	1059478	1064008	+	1305	protein_coding	NA && sp|Q9SH88|RRS1_ARATH Ribosome biogenesis regulatory protein homolog OS=Arabidopsis thaliana OX=3702 GN=At2g37990 PE=2 SV=2 && PF04939:Ribosome biogenesis regulatory protein (RRS1)	NF-YC
Solyc01g097520_3	269.423386	378.1456418	316.4025848	63.046981	79.59060207	53.51980949	321.3238709	65.38579752	2.299894553	2.38E-19	7.64E-18	Solyc01g097520_3	1	88219535	88222116	+	1599	protein_coding	NA && sp|Q9ZVJ6|ANXD4_ARATH Annexin D4 OS=Arabidopsis thaliana OX=3702 GN=ANN4 PE=1 SV=1 && PF00191:Annexin	MYB
Solyc03g005470_3	481.5226474	560.0019428	604.3516997	1126.048405	1219.388092	1132.835968	548.62543	1159.424155	-1.077028552	2.55E-19	8.16E-18	Solyc03g005470_3	3	365958	369880	+	839	protein_coding	NA && - && PF05514:HR-like lesion-inducing	-
Solyc01g005160_3	252.2261486	368.042514	160.47757	38.12143037	21.77478736	17.8399365	260.2487442	25.91205141	3.330385406	2.58E-19	8.27E-18	Solyc01g005160_3	1	137971	139251	+	1281	protein_coding	NA && sp|Q5PNY6|PUB21_ARATH U-box domain-containing protein 21 OS=Arabidopsis thaliana OX=3702 GN=PUB21 PE=2 SV=1 && PF04564:U-box domain	Dof
Solyc02g031740_3	361.1419855	176.0830851	336.8890831	38.12143037	48.05470314	41.4141383	291.3713846	42.5300906	2.778339355	3.05E-19	9.74E-18	Solyc02g031740_3	2	27318136	27319339	+	875	protein_coding	NA && sp|Q9SA16|P2A09_ARATH Protein PHLOEM PROTEIN 2-LIKE A9 OS=Arabidopsis thaliana OX=3702 GN=PP2A9 PE=2 SV=1 && PF14299:Phloem protein 2	NF-X1
Solyc04g007580_1	1216.704546	1368.25217	935.5500888	495.5785948	370.1713851	483.5897072	1173.502268	449.7798957	1.381389188	3.13E-19	9.98E-18	Solyc04g007580_1	4	1262147	1262641	+	495	protein_coding	NA && - && PF14009:Domain of unknown function (DUF4228)	bHLH
Solyc10g084325_1	427.0647289	571.5483747	533.7870945	156.8843481	148.6692378	174.5765214	510.800066	160.0433691	1.673610651	3.16E-19	1.01E-17	Solyc10g084325_1	10	64043743	64045929	+	2187	protein_coding	NA && sp|O82777|SBT3_SOLLC Subtilisin-like protease SBT3 OS=Solanum lycopersicum OX=4081 GN=sbt3 PE=1 SV=1 && PF17766:Fibronectin type-III domain|PF05922:Peptidase inhibitor I9|PF00082:Subtilase family	bHLH
Solyc01g110430_3	607.6357217	588.8680224	594.1084505	245.5899841	176.4508631	184.1336303	596.8707315	202.0581592	1.563271576	3.81E-19	1.21E-17	Solyc01g110430_3	1	97060628	97063447	-	2483	protein_coding	NA && sp|P49726|SPE1_SOLLC Arginine decarboxylase OS=Solanum lycopersicum OX=4081 PE=2 SV=1 && PF02784:Pyridoxal-dependent decarboxylase, pyridoxal binding domain	G2-like
Solyc04g007630_2	270.8564891	295.8773152	179.8259295	0	0	0	248.8532446	0	10.9035275	3.93E-19	1.25E-17	Solyc04g007630_2	4	1308419	1309644	+	821	protein_coding	NA && sp|Q9C9A3|HIP20_ARATH Heavy metal-associated isoprenylated plant protein 20 OS=Arabidopsis thaliana OX=3702 GN=HIPP20 PE=1 SV=1 && PF00403:Heavy-metal-associated domain	MIKC_MADS
Solyc01g081250_3	233.5958081	207.8357726	223.0752037	620.9394524	656.9978944	552.4008908	221.5022615	610.1127459	-1.460992565	4.67E-19	1.48E-17	Solyc01g081250_3	1	80365913	80372067	+	1867	protein_coding	NA && sp|Q9FQA3|GST23_MAIZE Glutathione transferase GST 23 OS=Zea mays OX=4577 PE=2 SV=1 && PF02798:Glutathione S-transferase, N-terminal domain|PF00043:Glutathione S-transferase, C-terminal domain	-
Solyc02g070910_2	778.1749926	772.1676274	1042.535135	367.2853195	307.0995872	282.8904216	864.2925851	319.0917761	1.440233698	4.83E-19	1.53E-17	Solyc02g070910_2	2	41056266	41068536	+	7552	protein_coding	NA && sp|Q9FL28|FLS2_ARATH LRR receptor-like serine/threonine-protein kinase FLS2 OS=Arabidopsis thaliana OX=3702 GN=FLS2 PE=1 SV=1 && PF08263:Leucine rich repeat N-terminal domain|PF13855:Leucine rich repeat|PF00069:Protein kinase domain	C3H
Solyc01g079260_3	1043.299069	1062.271727	1049.363968	542.4972784	391.9461725	417.9642265	1051.644921	450.8025591	1.222424264	4.96E-19	1.57E-17	Solyc01g079260_3	1	78215921	78218540	+	1409	protein_coding	NA && sp|Q8VWJ2|WRK28_ARATH WRKY transcription factor 28 OS=Arabidopsis thaliana OX=3702 GN=WRKY28 PE=2 SV=1 && PF03106:WRKY DNA -binding domain	WRKY
Solyc03g114940_3	137.5778992	137.1138778	133.1622389	5.864835442	0	7.64568707	135.9513386	4.503507504	4.884959194	5.37E-19	1.69E-17	Solyc03g114940_3	3	66280551	66282922	-	1979	protein_coding	NA && sp|Q9LMX7|C78A5_ARATH Cytochrome P450 78A5 OS=Arabidopsis thaliana OX=3702 GN=CYP78A5 PE=2 SV=1 && PF00067:Cytochrome P450	G2-like
Solyc11g066720_2	394.1033572	473.4037043	447.2885461	114.3642911	106.6213726	148.4537573	438.2652025	123.1464737	1.828905619	6.29E-19	1.98E-17	Solyc11g066720_2	11	52802191	52807370	+	1971	protein_coding	NA && sp|Q9SGE0|AXS2_ARATH UDP-D-apiose/UDP-D-xylose synthase 2 OS=Arabidopsis thaliana OX=3702 GN=AXS2 PE=2 SV=1 && PF01370:NAD dependent epimerase/dehydratase family	Trihelix
Solyc08g007820_1	878.4922108	855.879258	804.6641275	0	6.006837892	7.64568707	846.3451988	4.550841654	7.528241983	6.32E-19	1.98E-17	Solyc08g007820_1	8	2326932	2327666	-	735	protein_coding	NA && sp|Q9FJ93|DRE1D_ARATH Dehydration-responsive element-binding protein 1D OS=Arabidopsis thaliana OX=3702 GN=DREB1D PE=2 SV=1 && PF00847:AP2 domain	ERF
Solyc10g048060_1	401.2688728	534.0224713	432.4927418	122.4284398	121.6384673	150.365179	455.9280286	131.4773621	1.791530798	6.56E-19	2.05E-17	Solyc10g048060_1	10	43820727	43821170	-	444	protein_coding	NA && sp|P93276|M030_ARATH Uncharacterized mitochondrial protein AtMg00030 OS=Arabidopsis thaliana OX=3702 GN=AtMg00030 PE=4 SV=1 && -	-
Solyc01g105020_3	765.2770646	750.5180677	992.4570285	321.0997404	329.6252293	354.2501676	836.0840536	334.9917125	1.321064503	8.98E-19	2.81E-17	Solyc01g105020_3	1	93206296	93220390	-	3980	protein_coding	NA && sp|Q339D2|P2C71_ORYSJ Probable protein phosphatase 2C 71 OS=Oryza sativa subsp. japonica OX=39947 GN=Os10g0370000 PE=2 SV=1 && PF07228:Stage II sporulation protein E (SpoIIE)|PF14368:Probable lipid transfer	C2H2
Solyc01g091950_3	224.9971894	222.2688124	248.1142571	581.3518132	667.5098608	607.1949815	231.7934196	618.6855518	-1.414055217	9.33E-19	2.91E-17	Solyc01g091950_3	1	85356995	85373249	+	2526	protein_coding	NA && sp|Q8S8S2|LPCT2_ARATH Lysophospholipid acyltransferase LPEAT2 OS=Arabidopsis thaliana OX=3702 GN=LPEAT2 PE=1 SV=1 && PF01486:K-box region|PF13833:EF-hand domain pair|PF01553:Acyltransferase	bHLH
Solyc03g007480_3	1390.110024	935.2609767	1205.288983	489.7137594	501.570964	512.8981743	1176.886661	501.3942992	1.231080107	9.78E-19	3.05E-17	Solyc03g007480_3	3	2052941	2056797	+	2141	protein_coding	NA && sp|P34109|MYOD_DICDI Myosin ID heavy chain OS=Dictyostelium discoideum OX=44689 GN=myoD PE=1 SV=2 && PF06017:Unconventional myosin tail, actin- and lipid-binding	-
Solyc08g065610_3	336.7792325	219.3822044	211.6938157	686.9188511	810.9231154	841.0255777	255.9517509	779.6225148	-1.610726277	1.12E-18	3.49E-17	Solyc08g065610_3	8	53811248	53817065	-	1975	protein_coding	NA && sp|Q39119|VPEG_ARATH Vacuolar-processing enzyme gamma-isozyme OS=Arabidopsis thaliana OX=3702 GN=At4g32940 PE=1 SV=2 && PF01650:Peptidase C13 family	-
Solyc06g035490_3	292.3530359	220.8255084	319.8170012	31.5234905	46.55299366	12.74281178	277.6651818	30.27309865	3.208251534	1.15E-18	3.55E-17	Solyc06g035490_3	6	24468359	24470013	+	1065	protein_coding	NA && sp|Q9FLI1|BH036_ARATH Transcription factor bHLH36 OS=Arabidopsis thaliana OX=3702 GN=BHLH36 PE=2 SV=1 && PF00010:Helix-loop-helix DNA-binding domain	bHLH
Solyc03g121030_2	323.8813045	287.2174913	348.270471	87.2394272	55.5632505	65.62548069	319.7897556	69.47605279	2.203793579	1.18E-18	3.65E-17	Solyc03g121030_2	3	70737923	70753997	-	6908	protein_coding	NA && sp|Q0WVF8|MMS19_ARATH MMS19 nucleotide excision repair protein homolog OS=Arabidopsis thaliana OX=3702 GN=MMS19 PE=1 SV=1 && PF14500:Dos2-interacting transcription regulator of RNA-Pol-II|PF12460:RNAPII transcription regulator C-terminal	NAC
Solyc01g111240_3	376.9061198	443.0943208	302.7449192	832.0735283	1033.926972	1068.484768	374.2484533	978.1617562	-1.390242381	1.22E-18	3.76E-17	Solyc01g111240_3	1	97468473	97475308	-	4827	protein_coding	NA && sp|Q9SLF3|TC132_ARATH Translocase of chloroplast 132, chloroplastic OS=Arabidopsis thaliana OX=3702 GN=TOC132 PE=1 SV=1 && PF04548:AIG1 family|PF11886:Translocase of chloroplast 159/132, membrane anchor domain	bHLH
Solyc01g111350_3	442.8288632	440.2077128	668.0874722	84.30700948	120.1367578	152.2766008	517.0413494	118.9067894	2.119982802	1.29E-18	3.97E-17	Solyc01g111350_3	1	97535337	97539668	-	1928	protein_coding	NA && sp|F4I9E1|NFD4_ARATH Protein NUCLEAR FUSION DEFECTIVE 4 OS=Arabidopsis thaliana OX=3702 GN=NFD4 PE=3 SV=1 && PF06813:Nodulin-like	NF-YC
Solyc08g067100_2	1534.853438	1153.199877	1240.571286	504.375848	582.6632755	649.883401	1309.541534	578.9741748	1.176325418	1.29E-18	3.98E-17	Solyc08g067100_2	8	56075310	56079311	-	2004	protein_coding	NA && sp|Q8S9J6|ASPA_ARATH Aspartyl protease family protein At5g10770 OS=Arabidopsis thaliana OX=3702 GN=At5g10770 PE=2 SV=1 && PF14541:Xylanase inhibitor C-terminal|PF14543:Xylanase inhibitor N-terminal	Trihelix
Solyc06g051810_3	444.2619663	619.1774059	686.2976929	1521.924797	1389.081263	1257.715523	583.2456884	1389.573861	-1.249461183	1.45E-18	4.45E-17	Solyc06g051810_3	6	35573917	35584964	-	2762	protein_coding	NA && sp|Q8VZ79|IDN2_ARATH Protein INVOLVED IN DE NOVO 2 OS=Arabidopsis thaliana OX=3702 GN=IDN2 PE=1 SV=1 && PF03470:XS zinc finger domain|PF03469:XH domain|PF03468:XS domain	C2H2
Solyc10g049630_2	1008.904594	1265.777587	1160.90157	575.4869777	535.3594271	555.5865938	1145.194584	555.4776662	1.043861677	1.89E-18	5.81E-17	Solyc10g049630_2	10	46215750	46218841	-	1599	protein_coding	NA && sp|O81760|P2C63_ARATH Probable protein phosphatase 2C 63 OS=Arabidopsis thaliana OX=3702 GN=At4g33920 PE=2 SV=1 && PF00481:Protein phosphatase 2C	LBD
Solyc03g117270_1	204.9337458	285.7741873	163.8919864	34.45590822	15.01709473	16.56565532	218.1999731	22.01288609	3.310871052	1.90E-18	5.83E-17	Solyc03g117270_1	3	67931799	67933070	+	1272	protein_coding	NA && sp|Q8GXC7|FBK50_ARATH F-box/kelch-repeat protein At3g06240 OS=Arabidopsis thaliana OX=3702 GN=At3g06240 PE=2 SV=1 && PF00646:F-box domain	CAMTA
Solyc12g044330_2	766.7101677	655.2600053	755.7241593	207.4685538	254.5397557	310.9246075	725.8981108	257.6443057	1.493051255	1.95E-18	5.97E-17	Solyc12g044330_2	12	60201772	60203397	+	1138	protein_coding	NA && sp|Q41951|TIP21_ARATH Aquaporin TIP2-1 OS=Arabidopsis thaliana OX=3702 GN=TIP2-1 PE=1 SV=2 && PF00230:Major intrinsic protein	BES1
Solyc11g072600_2	289.4868297	235.2585482	279.9821434	50.58420569	57.06495997	61.16549656	268.2425071	56.27155407	2.252277496	2.04E-18	6.24E-17	Solyc11g072600_2	11	56068300	56071320	-	1584	protein_coding	NA && sp|Q9SK03|RAP27_ARATH Ethylene-responsive transcription factor RAP2-7 OS=Arabidopsis thaliana OX=3702 GN=RAP2-7 PE=2 SV=2 && PF00847:AP2 domain	AP2
Solyc02g068920_3	96.01790885	75.05180677	69.42646644	341.6266645	322.116682	344.6930588	80.16539402	336.1454684	-2.073212894	2.22E-18	6.78E-17	Solyc02g068920_3	2	39370501	39379215	-	2236	protein_coding	NA && sp|Q71N54|LCAT4_ARATH Lecithin-cholesterol acyltransferase-like 4 OS=Arabidopsis thaliana OX=3702 GN=LCAT4 PE=1 SV=1 && PF02450:Lecithin:cholesterol acyltransferase	AP2
Solyc04g064810_3	603.3364123	700.0024286	531.5108169	243.3906708	183.2085557	181.5850679	611.6165526	202.7280982	1.592529196	2.49E-18	7.60E-17	Solyc04g064810_3	4	55985987	55994188	+	1881	protein_coding	NA && sp|Q9ZQ34|Y2433_ARATH Uncharacterized protein At2g24330 OS=Arabidopsis thaliana OX=3702 GN=At2g24330 PE=2 SV=1 && PF10058:Predicted integral membrane zinc-ribbon metal-binding protein	-
Solyc06g062430_3	147.6096211	236.7018521	210.5556769	27.85796835	16.5188042	26.12276416	198.28905	23.49984557	3.074156356	2.52E-18	7.67E-17	Solyc06g062430_3	6	39493055	39496715	-	1264	protein_coding	NA && sp|Q8L799|MIOX1_ARATH Inositol oxygenase 1 OS=Arabidopsis thaliana OX=3702 GN=MIOX1 PE=2 SV=1 && PF05153:Myo-inositol oxygenase	C3H
Solyc02g080920_2	424.1985227	337.7331305	333.4746667	0	0	0.637140589	365.1354399	0.212380196	10.49631433	2.69E-18	8.17E-17	Solyc02g080920_2	2	45573595	45573993	-	399	protein_coding	NA && - && PF04885:Stigma-specific protein, Stig1	-
Solyc04g056270_3	1215.271443	1381.241905	1236.01873	670.7905537	544.369684	663.9004939	1277.510693	626.3535772	1.027271232	2.70E-18	8.19E-17	Solyc04g056270_3	4	53863355	53874119	-	4116	protein_coding	NA && sp|Q8GSA7|CMTA3_ARATH Calmodulin-binding transcription activator 3 OS=Arabidopsis thaliana OX=3702 GN=CAMTA3 PE=1 SV=1 && PF03859:CG-1 domain|PF12796:Ankyrin repeats (3 copies)	CAMTA
Solyc01g091530_3	945.8480573	1031.962343	737.5139386	361.4204841	394.1987367	354.2501676	905.108113	369.9564628	1.289232677	3.07E-18	9.29E-17	Solyc01g091530_3	1	85023730	85025737	-	1065	protein_coding	NA && sp|Q9LZX4|FLA10_ARATH Fasciclin-like arabinogalactan protein 10 OS=Arabidopsis thaliana OX=3702 GN=FLA10 PE=2 SV=1 && PF02469:Fasciclin domain	NF-YB
Solyc02g077780_3	619.1005466	611.960886	422.2494926	168.614019	148.6692378	184.7707709	551.1036417	167.3513425	1.715971686	3.16E-18	9.57E-17	Solyc02g077780_3	2	43193698	43202116	-	2247	protein_coding	NA && sp|Q9SGN6|NSL1_ARATH MACPF domain-containing protein NSL1 OS=Arabidopsis thaliana OX=3702 GN=NSL1 PE=2 SV=1 && PF01823:MAC/Perforin domain	-
Solyc06g076800_3	230.7296019	151.5469175	163.8919864	16.8614019	1.501709473	11.46853061	182.0561686	9.943880658	4.186740787	3.42E-18	1.03E-16	Solyc06g076800_3	6	47845701	47848796	+	2832	protein_coding	NA && sp|P48422|C86A1_ARATH Cytochrome P450 86A1 OS=Arabidopsis thaliana OX=3702 GN=CYP86A1 PE=1 SV=2 && PF00067:Cytochrome P450	NAC
Solyc05g014260_3	892.823242	1070.93155	760.2767145	324.0321582	322.116682	405.8585553	908.0105023	350.6691318	1.369835093	3.48E-18	1.05E-16	Solyc05g014260_3	5	8044515	8050118	+	3350	protein_coding	NA && sp|Q9FXD6|ARR11_ARATH Two-component response regulator ARR11 OS=Arabidopsis thaliana OX=3702 GN=ARR11 PE=1 SV=1 && PF00072:Response regulator receiver domain|PF00249:Myb-like DNA-binding domain	ARR-B
Solyc12g010350_2	630.5653716	802.4770109	493.9522367	208.2016582	207.986762	151.6394602	642.3315397	189.2759601	1.762728804	3.86E-18	1.16E-16	Solyc12g010350_2	12	3408460	3410478	+	1708	protein_coding	NA && sp|Q5SMI4|RL393_ORYSJ 60S ribosomal protein L39-3 OS=Oryza sativa subsp. japonica OX=39947 GN=RPL39C PE=3 SV=1 && -	-
Solyc03g118425_1	659.2274339	746.1881558	688.5739705	279.3127879	226.0072757	302.6417799	697.9965201	269.3206145	1.372277911	4.20E-18	1.26E-16	Solyc03g118425_1	3	68782434	68786923	+	4337	protein_coding	NA && sp|Q9SY59|NFXL1_ARATH NF-X1-type zinc finger protein NFXL1 OS=Arabidopsis thaliana OX=3702 GN=NFXL1 PE=1 SV=1 && PF01422:NF-X1 type zinc finger	NF-X1
Solyc02g086300_3	1081.992853	1005.982872	1218.946649	495.5785948	557.1342145	551.1266096	1102.307458	534.6131397	1.045121607	4.24E-18	1.27E-16	Solyc02g086300_3	2	49632533	49634492	-	1584	protein_coding	NA && sp|Q8H0Z4|GT121_ARATH Putative glutamine amidotransferase GAT1_2.1 OS=Arabidopsis thaliana OX=3702 GN=GAT1_2.1 PE=2 SV=1 && PF07722:Peptidase C26	-
Solyc02g078860_3	174.8385803	168.8665652	121.780851	517.5717277	623.2094313	454.2812401	155.1619988	531.6874664	-1.782224224	4.27E-18	1.28E-16	Solyc02g078860_3	2	44066609	44069986	-	1805	protein_coding	NA && sp|Q38945|DPNPH_ARATH PAP-specific phosphatase HAL2-like OS=Arabidopsis thaliana OX=3702 GN=AHL PE=2 SV=1 && PF00459:Inositol monophosphatase family	bHLH
Solyc12g055930_2	401.2688728	228.0420283	264.0482002	10.99656645	21.02393262	49.05982537	297.7863671	27.02677481	3.449622701	4.28E-18	1.28E-16	Solyc12g055930_2	12	62870061	62874997	-	2404	protein_coding	NA && sp|O65781|GALE2_CYATE UDP-glucose 4-epimerase GEPI48 OS=Cyamopsis tetragonoloba OX=3832 PE=2 SV=1 && PF16363:GDP-mannose 4,6 dehydratase	MYB
Solyc02g084570_3	462.8923068	473.4037043	473.4657384	922.9784776	1072.971418	957.6223056	469.9205832	984.5240672	-1.066612736	4.28E-18	1.28E-16	Solyc02g084570_3	2	48284598	48288482	-	2109	protein_coding	NA && sp|Q42600|C84A1_ARATH Cytochrome P450 84A1 OS=Arabidopsis thaliana OX=3702 GN=CYP84A1 PE=1 SV=1 && PF00067:Cytochrome P450	bHLH
Solyc01g107390_3	321.0150982	297.3206191	357.3755814	76.97596517	30.03418946	56.06837185	325.2370996	54.35950883	2.580234722	4.53E-18	1.35E-16	Solyc01g107390_3	1	94843134	94845241	-	1887	protein_coding	NA && sp|O82333|GH31_ARATH Probable indole-3-acetic acid-amido synthetase GH3.1 OS=Arabidopsis thaliana OX=3702 GN=GH3.1 PE=2 SV=1 && PF03321:GH3 auxin-responsive promoter	ERF
Solyc12g055750_2	1060.496307	1108.457454	1007.252833	521.2372499	487.304724	370.8158229	1058.735531	459.7859323	1.2042848	4.97E-18	1.48E-16	Solyc12g055750_2	12	62685938	62698477	-	1795	protein_coding	NA && sp|Q5KQN0|CAX2_ORYSJ Vacuolar cation/proton exchanger 2 OS=Oryza sativa subsp. japonica OX=39947 GN=CAX2 PE=2 SV=2 && PF04627:Mitochondrial ATP synthase epsilon chain|PF01699:Sodium/calcium exchanger protein	ERF
Solyc07g009290_3	20.06344364	49.0723352	47.80182935	408.3391676	266.5534315	230.6448933	38.97920273	301.8458308	-2.944414788	5.01E-18	1.49E-16	Solyc07g009290_3	7	4351201	4352098	+	687	protein_coding	NA && - && -	-
Solyc03g117260_2	257.9585611	170.3098692	179.8259295	0	0	0	202.6981199	0	10.60887384	5.14E-18	1.52E-16	Solyc03g117260_2	3	67921596	67928527	+	4729	protein_coding	NA && sp|P0C897|Y3264_ARATH Putative UPF0481 protein At3g02645 OS=Arabidopsis thaliana OX=3702 GN=At3g02645 PE=3 SV=1 && PF01145:SPFH domain / Band 7 family	bZIP
Solyc09g083210_3	202.0675395	251.1348919	310.7118908	714.7768195	705.0525976	694.4832422	254.6381074	704.7708864	-1.463190135	5.50E-18	1.63E-16	Solyc09g083210_3	9	69303107	69307023	+	1983	protein_coding	NA && sp|Q0GXS4|NFP_MEDTR Serine/threonine receptor-like kinase NFP OS=Medicago truncatula OX=3880 GN=NFP PE=1 SV=1 && PF00069:Protein kinase domain	GeBP
Solyc02g086460_3	214.9654676	154.4335255	152.5105984	493.3792815	588.6701134	553.0380314	173.9698638	545.0291421	-1.65088135	5.66E-18	1.67E-16	Solyc02g086460_3	2	49761704	49779431	+	12110	protein_coding	NA && - && -	-
Solyc02g085050_3	709.386043	447.4242327	591.832173	151.0195126	155.4269305	205.1592697	582.8808162	170.5352376	1.771414501	5.72E-18	1.69E-16	Solyc02g085050_3	2	48709323	48712648	-	1063	protein_coding	NA && sp|A2X8Q3|IPYR_ORYSI Soluble inorganic pyrophosphatase OS=Oryza sativa subsp. indica OX=39946 GN=IPP PE=2 SV=1 && PF00719:Inorganic pyrophosphatase	MYB_related
Solyc01g110843_1	120.3806618	140.0004857	112.6757406	6.597939872	6.757692629	10.19424943	124.3522961	7.849960643	3.974551269	5.77E-18	1.70E-16	Solyc01g110843_1	1	97280515	97280817	-	303	protein_coding	NA && sp|Q9FJF9|SAU21_ARATH Auxin-responsive protein SAUR21 OS=Arabidopsis thaliana OX=3702 GN=SAUR21 PE=2 SV=1 && PF02519:Auxin responsive protein	NF-YC
Solyc12g056210_2	1026.101832	812.5801387	1144.967627	407.6060632	424.9837809	447.2726936	994.5498658	426.6208459	1.222299788	6.63E-18	1.95E-16	Solyc12g056210_2	12	63118945	63124345	-	2025	protein_coding	NA && - && -	-
Solyc02g085730_3	524.5157409	456.0840565	545.1684824	76.97596517	168.191461	115.3224466	508.5894266	120.1632909	2.083025056	6.87E-18	2.01E-16	Solyc02g085730_3	2	49169184	49170468	+	1116	protein_coding	NA && sp|A2XID3|AOC_ORYSI Allene oxide cyclase, chloroplastic OS=Oryza sativa subsp. indica OX=39946 GN=AOC PE=2 SV=1 && PF06351:Allene oxide cyclase	-
Solyc02g090560_3	298.0854484	217.9389004	237.871008	14.6620886	46.55299366	29.3084671	251.2984523	30.17451646	3.059605828	7.62E-18	2.23E-16	Solyc02g090560_3	2	52734175	52736988	-	2722	protein_coding	NA && sp|Q9LIK7|ACA13_ARATH Putative calcium-transporting ATPase 13, plasma membrane-type OS=Arabidopsis thaliana OX=3702 GN=ACA13 PE=3 SV=1 && PF00689:Cation transporting ATPase, C-terminus	MYB_related
Solyc08g068150_3	120.3806618	112.5777102	175.2733743	2.932417721	0	0	136.0772488	0.977472574	7.173621291	1.06E-17	3.09E-16	Solyc08g068150_3	8	57301622	57304426	-	1349	protein_coding	NA && sp|Q08298|RD22_ARATH BURP domain protein RD22 OS=Arabidopsis thaliana OX=3702 GN=RD22 PE=2 SV=1 && PF03181:BURP domain	-
Solyc12g042480_2	508.7516066	318.9701788	330.0602503	1054.204171	972.3568838	997.7621627	385.9273452	1008.107739	-1.387796232	1.06E-17	3.10E-16	Solyc12g042480_2	12	58716082	58717698	-	1500	protein_coding	NA && sp|A0A068Q5V6|C7150_PRUMU Cytochrome P450 71AU50 OS=Prunus mume OX=102107 GN=CYP71AU50 PE=2 SV=1 && PF00067:Cytochrome P450	MYB
Solyc08g007140_3	1185.176278	1115.673974	973.108669	571.8214556	479.7961766	456.1926619	1091.31964	502.6034314	1.118036581	1.08E-17	3.14E-16	Solyc08g007140_3	8	1705476	1708247	+	741	protein_coding	NA && sp|Q9XHE4|RL37A_GOSHI 60S ribosomal protein L37a OS=Gossypium hirsutum OX=3635 GN=RPL37A PE=3 SV=1 && -	B3
Solyc05g007490_3	889.9570358	1193.612388	1053.916523	202.3368227	424.9837809	329.4016846	1045.828649	318.9074294	1.713588438	1.17E-17	3.41E-16	Solyc05g007490_3	5	2047121	2053443	-	2610	protein_coding	NA && sp|B9DFI7|PMT2_ARATH Probable methyltransferase PMT2 OS=Arabidopsis thaliana OX=3702 GN=At1g26850 PE=2 SV=2 && PF03141:Putative S-adenosyl-L-methionine-dependent methyltransferase	NAC
Solyc03g096430_1	34.39447481	66.39198291	76.25529921	311.5693828	357.4068546	293.084671	59.01391898	320.6869695	-2.431491444	1.47E-17	4.27E-16	Solyc03g096430_1	3	59959994	59960191	+	198	protein_coding	NA && - && -	-
Solyc04g072620_1	664.9598464	613.40419	618.0093652	131.225693	250.785482	174.5765214	632.1244672	185.5292321	1.76936928	1.49E-17	4.31E-16	Solyc04g072620_1	4	59669198	59669356	-	159	protein_coding	NA && - && -	-
Solyc12g088360_2	517.3502253	474.8470082	347.1323322	63.046981	102.8670989	127.4281178	446.4431886	97.78073258	2.186453661	1.57E-17	4.54E-16	Solyc12g088360_2	12	64753570	64755991	+	1674	protein_coding	NA && sp|O22193|PUB4_ARATH U-box domain-containing protein 4 OS=Arabidopsis thaliana OX=3702 GN=PUB4 PE=1 SV=3 && PF00514:Armadillo/beta-catenin-like repeat	HSF
Solyc06g061030_3	22.92964987	11.54643181	4.552555177	176.6781677	152.4235115	245.9362674	13.00954562	191.6793155	-3.919280501	1.64E-17	4.75E-16	Solyc06g061030_3	6	39185345	39201980	+	2631	protein_coding	NA && sp|Q6LA43|APRR2_ARATH Two-component response regulator-like APRR2 OS=Arabidopsis thaliana OX=3702 GN=APRR2 PE=2 SV=2 && PF00072:Response regulator receiver domain|PF00249:Myb-like DNA-binding domain	ARR-B
Solyc11g012680_2	42.99309351	59.17546303	43.24927418	295.4410854	247.782063	239.5648615	48.47261024	260.9293367	-2.433010787	1.73E-17	4.98E-16	Solyc11g012680_2	11	5444020	5446596	-	2236	protein_coding	NA && - && -	-
Solyc10g018340_1	44.42619663	43.29911929	47.80182935	215.5327025	286.8265093	248.4848298	45.17571509	250.2813472	-2.467205873	1.83E-17	5.27E-16	Solyc10g018340_1	10	7429968	7430384	-	417	protein_coding	NA && sp|O22150|SAU36_ARATH Auxin-responsive protein SAUR36 OS=Arabidopsis thaliana OX=3702 GN=SAUR36 PE=2 SV=1 && PF02519:Auxin responsive protein	ZF-HD
Solyc04g076220_3	197.7682302	124.124142	117.2282958	526.3689809	488.8064335	512.8981743	146.373556	509.3578629	-1.804379437	1.84E-17	5.29E-16	Solyc04g076220_3	4	61249700	61251192	+	1389	protein_coding	NA && sp|Q9LTA2|AHL17_ARATH AT-hook motif nuclear-localized protein 17 OS=Arabidopsis thaliana OX=3702 GN=AHL17 PE=2 SV=1 && PF03479:Plants and Prokaryotes Conserved (PCC) domain	NAC
Solyc01g110290_3	584.7060718	658.1466132	546.3066212	234.5934177	159.9320589	131.888102	596.3864354	175.4711928	1.766247988	1.86E-17	5.33E-16	Solyc01g110290_3	1	96932903	96941098	+	2254	protein_coding	NA && sp|D0VFU8|SLSS_SOLLC Squalene synthase OS=Solanum lycopersicum OX=4081 GN=SS PE=1 SV=1 && PF00494:Squalene/phytoene synthase	-
Solyc05g010330_3	173.4054772	219.3822044	237.871008	19.06071519	9.010256838	33.13131064	210.2195632	20.40076089	3.353095765	1.91E-17	5.47E-16	Solyc05g010330_3	5	4476837	4481016	+	2275	protein_coding	NA && sp|Q96519|PER11_ARATH Peroxidase 11 OS=Arabidopsis thaliana OX=3702 GN=PER11 PE=1 SV=1 && PF00141:Peroxidase	NAC
Solyc11g063520_1	904.2880669	1368.25217	792.1446007	380.4811993	273.3111241	362.5329952	1021.561612	338.7751062	1.590487451	1.95E-17	5.57E-16	Solyc11g063520_1	11	49916015	49916374	+	360	protein_coding	NA && - && -	-
Solyc08g062450_1	40.12688728	34.63929543	43.24927418	302.7721297	195.9730862	242.7505645	39.33848563	247.1652601	-2.647066761	2.00E-17	5.71E-16	Solyc08g062450_1	8	51172710	51173186	-	477	protein_coding	NA && sp|O82013|HSP21_SOLPE 17.3 kDa class II heat shock protein OS=Solanum peruvianum OX=4082 PE=2 SV=1 && PF00011:Hsp20/alpha crystallin family	NF-YB
Solyc04g058100_3	950.1473667	743.3015479	800.1115723	344.5590822	386.6901893	310.2874669	831.1868289	347.1789128	1.260178783	2.13E-17	6.07E-16	Solyc04g058100_3	4	55154558	55155327	+	494	protein_coding	NA && sp|Q43512|MT2X_SOLLC Metallothionein-like protein type 2 OS=Solanum lycopersicum OX=4081 PE=3 SV=1 && -	-
Solyc09g014590_3	193.4689208	259.7947158	116.090157	0	0	0	189.7845979	0	10.51207097	2.32E-17	6.60E-16	Solyc09g014590_3	9	6230419	6231472	-	969	protein_coding	NA && sp|Q05091|PGIP_PYRCO Polygalacturonase inhibitor OS=Pyrus communis OX=23211 GN=PGIP PE=1 SV=1 && PF13855:Leucine rich repeat|PF08263:Leucine rich repeat N-terminal domain	MYB_related
Solyc03g043620_1	265.1240767	428.661281	194.6217338	50.58420569	47.3038484	47.1484036	296.1356972	48.3454859	2.612354131	2.38E-17	6.79E-16	Solyc03g043620_1	3	7123460	7123801	+	342	protein_coding	NA && - && -	ERF
Solyc10g012080_3	427.0647289	451.7541446	386.96719	108.4994557	129.1470147	65.62548069	421.9286878	101.0906503	2.064792975	2.40E-17	6.81E-16	Solyc10g012080_3	10	4396499	4399512	-	1400	protein_coding	NA && - && -	-
Solyc04g082890_3	455.7267913	502.2697838	500.7810694	1027.079307	1023.415006	922.5795731	486.2592148	991.0246286	-1.02609517	2.82E-17	7.97E-16	Solyc04g082890_3	4	66477287	66479727	-	1301	protein_coding	NA && sp|Q9C7S0|BZP60_ARATH bZIP transcription factor 60 OS=Arabidopsis thaliana OX=3702 GN=BZIP60 PE=1 SV=1 && -	bZIP
Solyc03g117040_3	159.074446	248.2482839	298.1923641	867.262541	676.5201176	717.4203034	235.171698	753.7343207	-1.675008206	3.23E-17	9.10E-16	Solyc03g117040_3	3	67781827	67788505	-	3045	protein_coding	NA && sp|F4JH53|FDM2_ARATH Factor of DNA methylation 2 OS=Arabidopsis thaliana OX=3702 GN=FDM2 PE=1 SV=1 && PF03468:XS domain|PF03470:XS zinc finger domain|PF03469:XH domain	NAC
Solyc07g065970_2	42.99309351	57.73215906	60.32135609	266.1169082	238.0209515	359.9844329	53.68220289	288.0407642	-2.420062458	3.93E-17	1.11E-15	Solyc07g065970_2	7	67666737	67669812	-	828	protein_coding	NA && sp|Q9FYB5|DNJ11_ARATH Chaperone protein dnaJ 11, chloroplastic OS=Arabidopsis thaliana OX=3702 GN=ATJ11 PE=1 SV=2 && PF00226:DnaJ domain	bHLH
Solyc08g077460_3	48.72550598	43.29911929	36.42044141	332.0963069	226.0072757	217.9020815	42.81502223	258.6685547	-2.600654206	3.96E-17	1.11E-15	Solyc08g077460_3	8	61500002	61503231	-	2703	protein_coding	NA && sp|Q9FHE4|BRG1_ARATH BOI-related E3 ubiquitin-protein ligase 1 OS=Arabidopsis thaliana OX=3702 GN=BRG1 PE=1 SV=1 && PF13920:Zinc finger, C3HC4 type (RING finger)	C2H2
Solyc03g093550_1	74.52136209	63.50537496	81.94599318	263.9175949	406.2124125	331.950247	73.32424341	334.0267514	-2.183208262	4.71E-17	1.32E-15	Solyc03g093550_1	3	56355720	56356445	-	726	protein_coding	NA && sp|Q40478|ERF5_TOBAC Ethylene-responsive transcription factor 5 OS=Nicotiana tabacum OX=4097 GN=ERF5 PE=2 SV=1 && PF00847:AP2 domain	ERF
Solyc12g008840_2	369.7406042	587.4247184	559.9642867	1130.447031	1275.702197	1209.292838	505.7098698	1205.147356	-1.251115953	4.88E-17	1.37E-15	Solyc12g008840_2	12	2183601	2190744	+	2742	protein_coding	NA && sp|P48981|BGAL_MALDO Beta-galactosidase OS=Malus domestica OX=3750 PE=1 SV=1 && PF01301:Glycosyl hydrolases family 35|PF17834:Beta-sandwich domain in beta galactosidase	MYB_related
Solyc02g084440_3	0	5.773215906	0	180.3436898	231.2632588	152.2766008	1.924405302	187.9611832	-6.721006429	5.06E-17	1.41E-15	Solyc02g084440_3	2	48088455	48090998	-	1555	protein_coding	NA && sp|Q944G9|ALFP2_ARATH Fructose-bisphosphate aldolase 2, chloroplastic OS=Arabidopsis thaliana OX=3702 GN=FBA2 PE=1 SV=2 && PF00274:Fructose-bisphosphate aldolase class-I	FAR1
Solyc10g078580_1	174.8385803	106.8044943	141.1292105	5.864835442	13.51538526	2.548562357	140.924095	7.309594352	4.291728844	5.26E-17	1.47E-15	Solyc10g078580_1	10	60490599	60490781	+	183	protein_coding	NA && - && -	-
Solyc08g005050_3	778.1749926	637.9403576	611.1805325	274.1810569	283.8230904	230.6448933	675.7652942	262.8830135	1.362291215	5.56E-17	1.55E-15	Solyc08g005050_3	8	33463	35295	-	1833	protein_coding	NA && sp|A0A060KY90|MYC1_SOLLC Transcription factor MYC1 OS=Solanum lycopersicum OX=4081 GN=MYC1 PE=1 SV=1 && PF00010:Helix-loop-helix DNA-binding domain|PF14215:bHLH-MYC and R2R3-MYB transcription factors N-terminal	bHLH
novel.229	230.7296019	287.2174913	216.2463709	26.39175949	44.30042945	50.97124714	244.7311547	40.55447869	2.588437737	5.75E-17	1.60E-15	-	10	20911570	20916248	-	2973	-	- && - && -	bHLH
Solyc03g113270_3	885.6577264	503.7130878	710.1986075	2468.362617	2585.192858	2781.118672	699.8564739	2611.558049	-1.899681864	5.80E-17	1.61E-15	Solyc03g113270_3	3	64941909	64944213	+	1702	protein_coding	NA && sp|P46668|ATHB6_ARATH Homeobox-leucine zipper protein ATHB-6 OS=Arabidopsis thaliana OX=3702 GN=ATHB-6 PE=1 SV=1 && PF02183:Homeobox associated leucine zipper|PF00046:Homeodomain	HD-ZIP
Solyc12g009300_2	300.9516546	421.4447611	299.3305029	945.704715	744.0970439	1013.690677	340.5756395	901.1641454	-1.406728986	6.11E-17	1.70E-15	Solyc12g009300_2	12	2563363	2579546	-	3715	protein_coding	NA && sp|P49037|SUS_SOLLC Sucrose synthase OS=Solanum lycopersicum OX=4081 PE=2 SV=1 && PF00534:Glycosyl transferases group 1|PF00862:Sucrose synthase	HB-other
Solyc12g096420_2	110.34894	165.9799573	213.9700933	541.7641739	540.6154103	618.6635121	163.4329969	567.0143654	-1.787532187	6.40E-17	1.77E-15	Solyc12g096420_2	12	66324074	66329271	+	4086	protein_coding	NA && sp|Q9FMM4|RHG1A_ARATH Probable E3 ubiquitin-protein ligase RHG1A OS=Arabidopsis thaliana OX=3702 GN=RHG1A PE=2 SV=1 && PF13639:Ring finger domain	bHLH
Solyc07g005050_3	914.3197888	942.4774966	836.5320137	359.2211708	349.1474525	461.9269272	897.776433	390.0985168	1.200151171	6.46E-17	1.79E-15	Solyc07g005050_3	7	101122	103597	-	663	protein_coding	NA && sp|Q5SMI4|RL393_ORYSJ 60S ribosomal protein L39-3 OS=Oryza sativa subsp. japonica OX=39947 GN=RPL39C PE=3 SV=1 && -	-
Solyc08g083120_3	877.0591077	834.2296984	944.6551991	409.0722721	361.1611283	449.821256	885.3146684	406.6848854	1.122042646	6.66E-17	1.84E-15	Solyc08g083120_3	8	65795903	65798974	+	2336	protein_coding	NA && sp|P51423|RL40_BRARP Ubiquitin-60S ribosomal protein L40 OS=Brassica rapa subsp. pekinensis OX=51351 PE=2 SV=2 && PF02183:Homeobox associated leucine zipper|PF00046:Homeodomain	HD-ZIP
Solyc09g018280_1	707.9529399	707.2189484	690.850248	279.3127879	276.314543	338.9587934	702.0073788	298.1953748	1.233551668	6.99E-17	1.93E-15	Solyc09g018280_1	9	14024426	14025757	+	1332	protein_coding	NA && sp|Q9LZW4|CIPKE_ARATH CBL-interacting serine/threonine-protein kinase 14 OS=Arabidopsis thaliana OX=3702 GN=CIPK14 PE=1 SV=1 && PF00069:Protein kinase domain|PF03822:NAF domain	YABBY
Solyc07g056050_1	523.0826378	584.5381104	670.3637497	236.0596265	235.7683873	214.7163786	592.6614993	228.8481308	1.375159382	7.08E-17	1.95E-15	Solyc07g056050_1	7	64076797	64078776	+	1980	protein_coding	NA && sp|F4JRE0|TMN12_ARATH Transmembrane 9 superfamily member 12 OS=Arabidopsis thaliana OX=3702 GN=TMN12 PE=2 SV=1 && PF02990:Endomembrane protein 70	-
Solyc12g096460_2	302.3847577	184.742909	203.7268442	722.8409682	605.1889176	731.4373964	230.284837	686.4890941	-1.57849068	7.21E-17	1.98E-15	Solyc12g096460_2	12	66354172	66358161	+	1475	protein_coding	NA && - && PF07800:Protein of unknown function (DUF1644)	WRKY
Solyc04g074780_3	715.1184555	619.1774059	516.7150125	209.667867	111.8773557	194.9650203	617.0036246	172.170081	1.838875414	7.72E-17	2.12E-15	Solyc04g074780_3	4	60782047	60786717	-	1025	protein_coding	NA && - && -	-
Solyc06g050530_3	173.4054772	128.4540539	193.483595	16.12829746	23.27649683	10.19424943	165.1143754	16.53301457	3.331472096	8.43E-17	2.31E-15	Solyc06g050530_3	6	33312949	33315516	-	2012	protein_coding	NA && sp|Q9SIY8|LAC5_ARATH Laccase-5 OS=Arabidopsis thaliana OX=3702 GN=LAC5 PE=2 SV=1 && PF07732:Multicopper oxidase|PF07731:Multicopper oxidase|PF00394:Multicopper oxidase	ERF
Solyc07g061920_3	269.423386	157.3201334	194.6217338	35.18901265	30.03418946	23.5742018	207.1217511	29.59913464	2.809969566	8.46E-17	2.31E-15	Solyc07g061920_3	7	64931517	64943197	+	6062	protein_coding	NA && sp|Q9LUD7|CALS8_ARATH Putative callose synthase 8 OS=Arabidopsis thaliana OX=3702 GN=CALS8 PE=3 SV=2 && PF04652:Vta1 like|PF14288:1,3-beta-glucan synthase subunit FKS1, domain-1|PF02364:1,3-beta-glucan synthase component	M-type_MADS
Solyc04g008810_3	864.1611796	759.1778916	653.2916678	307.1707563	342.3897598	283.5275622	758.876913	311.0293594	1.286180406	8.51E-17	2.32E-15	Solyc04g008810_3	4	2432046	2434439	+	843	protein_coding	NA && sp|Q9LYK9|RS263_ARATH 40S ribosomal protein S26-3 OS=Arabidopsis thaliana OX=3702 GN=RPS26C PE=2 SV=1 && PF01283:Ribosomal protein S26e	-
Solyc04g051360_3	139.0110024	202.0625567	145.6817656	0	0	0	162.2517749	0	10.28772424	8.77E-17	2.39E-15	Solyc04g051360_3	4	50365615	50367164	+	1173	protein_coding	NA && sp|Q9FGF8|ABR1_ARATH Ethylene-responsive transcription factor ABR1 OS=Arabidopsis thaliana OX=3702 GN=ABR1 PE=2 SV=1 && PF00847:AP2 domain	ERF
Solyc07g045030_3	25.79585611	10.10312783	20.48649829	192.8064651	204.9833431	155.4623038	18.79516075	184.4173707	-3.288421996	8.88E-17	2.42E-15	Solyc07g045030_3	7	58239403	58244760	+	1868	protein_coding	NA && sp|Q9SK55|NAC42_ARATH Transcription factor JUNGBRUNNEN 1 OS=Arabidopsis thaliana OX=3702 GN=JUB1 PE=1 SV=1 && PF02365:No apical meristem (NAM) protein	NAC
Solyc09g075120_3	748.0798272	840.0029143	558.8261479	224.3299556	244.7786441	291.8103898	715.6362965	253.6396632	1.493262173	9.30E-17	2.53E-15	Solyc09g075120_3	9	67350535	67355299	+	1768	protein_coding	NA && sp|Q9LZI2|UXS2_ARATH UDP-glucuronic acid decarboxylase 2 OS=Arabidopsis thaliana OX=3702 GN=UXS2 PE=1 SV=1 && PF16363:GDP-mannose 4,6 dehydratase	FAR1
Solyc07g054270_3	96.01790885	122.680838	110.399463	313.0355917	535.3594271	473.3954578	109.6994033	440.5968255	-2.005933049	9.41E-17	2.55E-15	Solyc07g054270_3	7	62735540	62738112	-	1623	protein_coding	NA && - && PF05623:Protein of unknown function (DUF789)	C3H
Solyc06g065030_3	525.948844	420.0014571	463.2224892	959.6336992	959.5923533	992.0278974	469.7242634	970.4179833	-1.047158758	9.72E-17	2.63E-15	Solyc06g065030_3	6	40656544	40667620	-	4347	protein_coding	NA && sp|Q940G0|TMN1_ARATH Transmembrane 9 superfamily member 1 OS=Arabidopsis thaliana OX=3702 GN=TMN1 PE=1 SV=1 && PF02990:Endomembrane protein 70|PF00854:POT family	MYB_related
Solyc04g007790_3	209.2330551	147.2170056	316.4025848	863.5970188	675.7692629	777.9486594	224.2842152	772.4383137	-1.776586573	9.88E-17	2.67E-15	Solyc04g007790_3	4	1474888	1476848	+	816	protein_coding	NA && sp|Q9SSK5|MLP43_ARATH MLP-like protein 43 OS=Arabidopsis thaliana OX=3702 GN=MLP43 PE=1 SV=1 && PF00407:Pathogenesis-related protein Bet v I family	-
Solyc02g071220_3	246.4937362	249.6915879	360.7899977	37.38832594	40.54615577	70.08546481	285.6584406	49.33998217	2.529667462	1.00E-16	2.71E-15	Solyc02g071220_3	2	41260568	41261898	-	1248	protein_coding	NA && sp|B8BLZ4|ORR10_ORYSI Two-component response regulator ORR10 OS=Oryza sativa subsp. indica OX=39946 GN=RR10 PE=2 SV=1 && PF00072:Response regulator receiver domain	M-type_MADS
Solyc08g076620_1	91.7185995	115.4643181	128.6096837	5.864835442	3.003418946	0	111.9308671	2.956084796	5.285234603	1.06E-16	2.86E-15	Solyc08g076620_1	8	60680892	60682202	+	1311	protein_coding	NA && sp|P0DO21|GIP2_NICBE Probable aspartic proteinase GIP2 OS=Nicotiana benthamiana OX=4100 GN=GIP2 PE=1 SV=1 && PF14541:Xylanase inhibitor C-terminal|PF14543:Xylanase inhibitor N-terminal	FAR1
Solyc08g008590_3	467.1916162	438.7644088	323.2314175	121.6953354	78.83974733	115.9595872	409.7291475	105.4982233	1.95397388	1.09E-16	2.95E-15	Solyc08g008590_3	8	2957697	2962642	+	911	protein_coding	NA && sp|P51423|RL40_BRARP Ubiquitin-60S ribosomal protein L40 OS=Brassica rapa subsp. pekinensis OX=51351 PE=2 SV=2 && PF01020:Ribosomal L40e family|PF00240:Ubiquitin family	MYB_related
Solyc05g009340_1	247.9268393	213.6089885	188.9310398	1.46620886	0	0	216.8222892	0.488736287	8.848992456	1.12E-16	3.02E-15	Solyc05g009340_1	5	3485365	3485721	-	357	protein_coding	NA && - && -	-
Solyc12g013900_2	197.7682302	303.093835	207.1412605	41.05384809	27.03077051	45.87412242	236.0011086	37.98624701	2.63001498	1.18E-16	3.16E-15	Solyc12g013900_2	12	4704861	4706760	-	1587	protein_coding	NA && sp|Q9T076|ENL2_ARATH Early nodulin-like protein 2 OS=Arabidopsis thaliana OX=3702 GN=At4g27520 PE=1 SV=1 && PF02298:Plastocyanin-like domain	HB-PHD
Solyc09g090130_3	934.3832324	1078.14807	836.5320137	475.0516708	352.1508714	351.0644646	949.6877722	392.755669	1.273315399	1.25E-16	3.35E-15	Solyc09g090130_3	9	70150859	70153182	+	1346	protein_coding	NA && sp|Q9LTC4|MYB15_ARATH Transcription factor MYB15 OS=Arabidopsis thaliana OX=3702 GN=MYB15 PE=1 SV=1 && PF00249:Myb-like DNA-binding domain	MYB
Solyc05g051870_3	280.888211	199.1759487	206.0031217	45.45247467	40.54615577	43.32556006	228.6890938	43.1080635	2.406033606	1.25E-16	3.35E-15	Solyc05g051870_3	5	63125646	63128056	+	745	protein_coding	NA && sp|P13447|LAT52_SOLLC Anther-specific protein LAT52 OS=Solanum lycopersicum OX=4081 GN=LAT52 PE=2 SV=1 && PF01190:Pollen proteins Ole e I like	EIL
Solyc03g114720_3	325.3144076	362.2692981	344.8560546	97.50288922	94.6076968	112.1367437	344.1465868	101.4157766	1.76116272	1.35E-16	3.61E-15	Solyc03g114720_3	3	66108773	66115562	+	2791	protein_coding	NA && sp|Q9LEZ3|BIM1_ARATH Transcription factor BIM1 OS=Arabidopsis thaliana OX=3702 GN=BIM1 PE=1 SV=2 && PF00010:Helix-loop-helix DNA-binding domain	bHLH
Solyc10g078230_2	0	2.886607953	4.552555177	222.8637468	111.126501	142.719492	2.479721043	158.9032466	-5.926800993	1.41E-16	3.76E-15	Solyc10g078230_2	10	60211217	60212320	-	1023	protein_coding	NA && sp|O22203|C98A3_ARATH Cytochrome P450 98A3 OS=Arabidopsis thaliana OX=3702 GN=CYP98A3 PE=1 SV=1 && PF00067:Cytochrome P450	G2-like
Solyc06g074120_3	25.79585611	14.43303976	2.276277588	260.2520727	193.720522	165.0194126	14.16839115	206.3306691	-3.90761367	1.50E-16	4.00E-15	Solyc06g074120_3	6	45983487	45988714	+	4066	protein_coding	NA && sp|Q9SJ56|BLH1_ARATH BEL1-like homeodomain protein 1 OS=Arabidopsis thaliana OX=3702 GN=BLH1 PE=1 SV=1 && PF05920:Homeobox KN domain|PF07526:Associated with HOX	TALE
Solyc10g079890_2	808.2701581	623.5073178	871.8143163	248.5224018	320.6149725	315.3845916	767.8639307	294.8406553	1.381826626	1.55E-16	4.12E-15	Solyc10g079890_2	10	61482197	61485334	-	1495	protein_coding	NA && sp|Q2QY10|CBP_ORYSJ Calcium-binding protein CBP OS=Oryza sativa subsp. japonica OX=39947 GN=CBP PE=2 SV=1 && PF00036:EF hand	-
Solyc09g090730_2	139.0110024	114.0210141	176.4115131	481.6496107	436.9974567	472.1211766	143.1478432	463.5894146	-1.688407633	1.61E-16	4.27E-15	Solyc09g090730_2	9	70641030	70642502	-	1473	protein_coding	NA && sp|P58905|AMT11_SOLLC Ammonium transporter 1 member 1 OS=Solanum lycopersicum OX=4081 GN=AMT1-1 PE=2 SV=1 && PF00909:Ammonium Transporter Family	GRAS
Solyc04g077615_1	550.311597	754.8479797	577.0363686	1411.959133	1316.248353	1209.929979	627.3986484	1312.712488	-1.066404003	1.61E-16	4.27E-15	Solyc04g077615_1	4	62662321	62696277	+	7145	protein_coding	NA && sp|Q9FJL3|FKB65_ARATH Peptidyl-prolyl cis-trans isomerase FKBP65 OS=Arabidopsis thaliana OX=3702 GN=FKBP65 PE=1 SV=1 && PF00254:FKBP-type peptidyl-prolyl cis-trans isomerase|PF00450:Serine carboxypeptidase	C3H
Solyc12g006680_2	0	0	0	218.4651202	276.314543	256.7676574	0	250.5157736	-9.999721831	1.66E-16	4.38E-15	Solyc12g006680_2	12	1143624	1145027	-	698	protein_coding	NA && sp|Q02921|NO93_SOYBN Early nodulin-93 OS=Glycine max OX=3847 PE=2 SV=1 && PF03386:Early nodulin 93 ENOD93 protein	-
Solyc10g005960_1	351.1102637	422.8880651	471.1894608	83.57390505	92.35513259	141.4452108	415.0625965	105.7914161	1.969596602	1.72E-16	4.54E-15	Solyc10g005960_1	10	736038	737285	-	1248	protein_coding	NA && sp|Q9FM65|FLA1_ARATH Fasciclin-like arabinogalactan protein 1 OS=Arabidopsis thaliana OX=3702 GN=FLA1 PE=1 SV=1 && PF02469:Fasciclin domain	NF-YB
Solyc01g067660_3	71.65515586	70.72189484	77.393438	304.2383385	398.7038651	263.1390633	73.25682957	322.027089	-2.133316602	1.80E-16	4.74E-15	Solyc01g067660_3	1	76364203	76367500	+	2326	protein_coding	NA && sp|Q8VYW2|BAM9_ARATH Inactive beta-amylase 9 OS=Arabidopsis thaliana OX=3702 GN=BAM9 PE=2 SV=1 && PF01373:Glycosyl hydrolase family 14	ERF
Solyc01g106320_2	723.7170742	1118.560582	1173.421097	2245.49887	2067.10309	2165.003722	1005.232918	2159.201894	-1.101256618	1.93E-16	5.07E-15	Solyc01g106320_2	1	94139441	94141307	-	1867	protein_coding	NA && - && PF00564:PB1 domain	MYB
Solyc01g103220_3	1057.6301	1415.881201	1249.676396	551.2945315	461.0248082	643.5119951	1241.062566	551.9437783	1.167875297	1.96E-16	5.15E-15	Solyc01g103220_3	1	91741144	91746360	+	1496	protein_coding	NA && sp|P00061|CYC_SOLTU Cytochrome c OS=Solanum tuberosum OX=4113 PE=1 SV=1 && PF00034:Cytochrome c	-
Solyc01g079670_2	169.1061678	161.6500454	338.0272219	30.79038607	9.761111575	22.93706121	222.9278117	21.16285295	3.397130337	2.06E-16	5.40E-15	Solyc01g079670_2	1	78650454	78651137	-	684	protein_coding	NA && - && PF05553:Cotton fibre expressed protein	-
Solyc09g090070_2	189.1696115	181.856301	253.8049511	545.4296961	624.7111408	578.523655	208.2769545	582.8881639	-1.478709728	2.08E-16	5.43E-15	Solyc09g090070_2	9	70099051	70110842	+	3060	protein_coding	NA && sp|A7KTC5|PHT11_PETHY Low affinity inorganic phosphate transporter 1 OS=Petunia hybrida OX=4102 GN=PT1 PE=2 SV=1 && PF00083:Sugar (and other) transporter	WRKY
Solyc11g013810_2	580.4067625	562.8885508	655.5679454	218.4651202	268.0551409	210.2563944	599.6210862	232.2588852	1.37067615	2.11E-16	5.51E-15	Solyc11g013810_2	11	7176907	7181577	-	3289	protein_coding	NA && sp|P17570|NIA_SOLLC Nitrate reductase [NADH] OS=Solanum lycopersicum OX=4081 GN=NIA PE=3 SV=1 && PF00174:Oxidoreductase molybdopterin binding domain|PF00970:Oxidoreductase FAD-binding domain|PF00173:Cytochrome b5-like Heme/Steroid binding domain|PF03404:Mo-co oxidoreductase dimerisation domain|PF00175:Oxidoreductase NAD-binding domain	C3H
Solyc01g058320_3	356.8426762	268.4545396	414.2825211	99.70220251	76.58718312	85.37683895	346.526579	87.22207486	1.992267605	2.13E-16	5.55E-15	Solyc01g058320_3	1	66029264	66033961	+	4071	protein_coding	NA && - && -	-
Solyc02g090970_1	563.209525	557.1153349	579.3126462	0	6.006837892	7.64568707	566.5458354	4.550841654	6.949190502	2.16E-16	5.62E-15	Solyc02g090970_1	2	53061908	53062990	+	1083	protein_coding	NA && sp|Q9SND6|M3K20_ARATH Mitogen-activated protein kinase kinase kinase 20 OS=Arabidopsis thaliana OX=3702 GN=MAPKKK20 PE=1 SV=1 && PF00069:Protein kinase domain	NF-YC
Solyc01g087620_3	179.1378896	127.0107499	175.2733743	21.99313291	6.757692629	13.37995237	160.4740046	14.04359264	3.514191362	2.20E-16	5.71E-15	Solyc01g087620_3	1	82453761	82464034	+	3092	protein_coding	NA && sp|Q9FGZ9|UBL5_ARATH Ubiquitin-like protein 5 OS=Arabidopsis thaliana OX=3702 GN=UBL5 PE=3 SV=1 && -	NAC
Solyc01g073720_2	703.6536305	636.4970536	779.625074	330.630098	280.8196715	258.6790792	706.5919194	290.0429496	1.286761329	2.27E-16	5.89E-15	Solyc01g073720_2	1	80962981	80963531	+	551	protein_coding	NA && - && -	-
Solyc12g019740_2	68.78894962	103.9178863	52.35438453	331.3632025	325.8709556	347.2416211	75.02040682	334.8252597	-2.168727117	2.57E-16	6.65E-15	Solyc12g019740_2	12	11252470	11254721	+	1575	protein_coding	NA && sp|O64654|TRL11_ARATH Thioredoxin-like 1-1, chloroplastic OS=Arabidopsis thaliana OX=3702 GN=At1g08570 PE=2 SV=1 && PF00085:Thioredoxin	HRT-like
Solyc03g112270_3	262.2578704	277.1143635	330.0602503	642.9325853	710.3085807	813.6285324	289.8108281	722.2898995	-1.314543593	2.58E-16	6.68E-15	Solyc03g112270_3	3	64207674	64211685	-	1858	protein_coding	NA && sp|Q8VYG9|PIRL9_ARATH Plant intracellular Ras-group-related LRR protein 9 OS=Arabidopsis thaliana OX=3702 GN=PIRL9 PE=2 SV=1 && PF13855:Leucine rich repeat	-
Solyc03g098300_1	199.2013333	103.9178863	122.9189898	2.199313291	0	0	142.0127365	0.73310443	7.649144447	3.00E-16	7.73E-15	Solyc03g098300_1	3	62077456	62078622	+	1167	protein_coding	NA && sp|O22616|DCOR_SOLLC Ornithine decarboxylase OS=Solanum lycopersicum OX=4081 GN=ODC PE=2 SV=2 && PF02784:Pyridoxal-dependent decarboxylase, pyridoxal binding domain|PF00278:Pyridoxal-dependent decarboxylase, C-terminal sheet domain	-
Solyc07g040720_3	521.6495346	564.3318548	386.96719	177.4112721	133.6521431	149.7280385	490.9828598	153.5971512	1.674379846	3.02E-16	7.78E-15	Solyc07g040720_3	7	49573122	49580506	+	2828	protein_coding	NA && sp|Q9CAI5|CKL2_ARATH Casein kinase 1-like protein 2 OS=Arabidopsis thaliana OX=3702 GN=CKL2 PE=1 SV=1 && PF00069:Protein kinase domain	C2H2
Solyc02g089440_3	652.0619183	656.7033093	623.7000592	280.7789968	232.7649683	291.8103898	644.1550956	268.4514516	1.261218291	3.12E-16	8.03E-15	Solyc02g089440_3	2	51902316	51905242	+	2386	protein_coding	NA && sp|Q9FWA4|GAUT9_ARATH Probable galacturonosyltransferase 9 OS=Arabidopsis thaliana OX=3702 GN=GAUT9 PE=2 SV=1 && PF01501:Glycosyl transferase family 8	MIKC_MADS
Solyc12g017510_2	349.6771606	359.3826901	275.4295882	52.78351898	54.06154103	96.84536956	328.1631463	67.89680985	2.266241584	3.21E-16	8.26E-15	Solyc12g017510_2	12	6776364	6804790	+	4989	protein_coding	NA && sp|Q8VZE7|RAP_ARATH RAP domain-containing protein, chloroplastic OS=Arabidopsis thaliana OX=3702 GN=RAP PE=1 SV=1 && -	-
Solyc04g016270_2	189.1696115	155.8768295	143.4054881	19.79381962	15.76794947	25.48562357	162.8173097	20.34913088	2.992882711	3.27E-16	8.39E-15	Solyc04g016270_2	4	7066662	7067107	+	446	protein_coding	NA && - && -	-
Solyc01g014840_3	461.4592037	487.836744	310.7118908	90.90494935	128.3961599	116.5967278	420.0026129	111.9659457	1.904786054	3.40E-16	8.70E-15	Solyc01g014840_3	1	15504164	15510115	-	4350	protein_coding	NA && sp|A0A290U7C4|ROQ1_NICBE Disease resistance protein Roq1 OS=Nicotiana benthamiana OX=4100 GN=ROQ1 PE=1 SV=1 && PF01582:TIR domain|PF00931:NB-ARC domain	WRKY
Solyc02g091810_2	141.8772086	186.186213	207.1412605	16.12829746	3.003418946	20.38849885	178.4015607	13.17340509	3.746701156	3.94E-16	1.01E-14	Solyc02g091810_2	2	53662938	53668261	+	2540	protein_coding	NA && sp|Q9T072|BH025_ARATH Transcription factor bHLH25 OS=Arabidopsis thaliana OX=3702 GN=BHLH25 PE=2 SV=2 && PF00010:Helix-loop-helix DNA-binding domain	bHLH
Solyc03g031980_3	226.4302925	290.1040993	188.9310398	51.31731012	30.03418946	40.13985712	235.1551439	40.4971189	2.535214135	4.15E-16	1.06E-14	Solyc03g031980_3	3	4493956	4497034	-	2201	protein_coding	NA && sp|Q9FG33|LRKS5_ARATH Probable L-type lectin-domain containing receptor kinase S.5 OS=Arabidopsis thaliana OX=3702 GN=LECRKS5 PE=2 SV=1 && PF00139:Legume lectin domain|PF07714:Protein tyrosine kinase	S1Fa-like
Solyc04g008740_3	621.9667528	613.40419	853.6040956	1524.857215	1389.832117	1394.70075	696.3250128	1436.463361	-1.040855184	4.38E-16	1.12E-14	Solyc04g008740_3	4	2399448	2404519	-	2469	protein_coding	NA && sp|P22200|KPYC_SOLTU Pyruvate kinase, cytosolic isozyme OS=Solanum tuberosum OX=4113 PE=2 SV=1 && PF00224:Pyruvate kinase, barrel domain|PF02887:Pyruvate kinase, alpha/beta domain	MYB_related
Solyc03g114730_3	461.4592037	473.4037043	575.8982298	195.7388829	181.7068462	182.2222085	503.5870459	186.5559792	1.434718982	4.55E-16	1.16E-14	Solyc03g114730_3	3	66118537	66122133	-	2479	protein_coding	NA && sp|Q4V398|RRT1_ARATH Rhamnogalacturonan I rhamnosyltransferase 1 OS=Arabidopsis thaliana OX=3702 GN=RRT1 PE=1 SV=1 && PF10250:GDP-fucose protein O-fucosyltransferase	MIKC_MADS
Solyc02g089470_1	203.5006426	239.5884601	264.0482002	57.18214556	42.79871998	45.87412242	235.7124343	48.61832932	2.279388265	5.05E-16	1.28E-14	Solyc02g089470_1	2	51924008	51924313	-	306	protein_coding	NA && - && -	-
Solyc12g010400_2	920.0522012	980.0034	1222.361065	403.2074366	263.5500125	467.6611925	1040.805555	378.1395472	1.460244555	5.53E-16	1.40E-14	Solyc12g010400_2	12	3450399	3451449	+	424	protein_coding	NA && - && -	-
Solyc02g092580_3	884.2246233	772.1676274	966.2798362	406.8729588	421.2295072	422.4242106	874.224029	416.8422255	1.069828417	5.82E-16	1.48E-14	Solyc02g092580_3	2	54264276	54266995	-	1601	protein_coding	NA && sp|Q9SZE7|PER51_ARATH Peroxidase 51 OS=Arabidopsis thaliana OX=3702 GN=PER51 PE=2 SV=1 && PF00141:Peroxidase	NAC
Solyc04g074830_1	525.948844	848.6627381	638.4958635	217.7320158	259.7957388	174.5765214	671.0358152	217.368092	1.627487812	6.40E-16	1.62E-14	Solyc04g074830_1	4	60833678	60834694	+	1017	protein_coding	NA && sp|Q8H0W9|CAP17_ARATH Putative clathrin assembly protein At5g10410 OS=Arabidopsis thaliana OX=3702 GN=At5g10410 PE=2 SV=2 && PF07651:ANTH domain	NAC
Solyc03g115060_3	75.95446521	93.81475847	155.9250148	2.932417721	6.006837892	5.097124714	108.5647462	4.678793442	4.538507563	6.91E-16	1.75E-14	Solyc03g115060_3	3	66375290	66379842	-	2342	protein_coding	NA && - && -	-
Solyc09g091550_3	90.28549638	124.124142	125.1952674	0	0	2.548562357	113.2016352	0.849520786	6.93903205	7.01E-16	1.77E-14	Solyc09g091550_3	9	71263224	71280670	+	3011	protein_coding	NA && sp|Q84UB4|BSMT2_PETHY S-adenosyl-L-methionine:benzoic acid/salicylic acid carboxyl methyltransferase 2 OS=Petunia hybrida OX=4102 GN=BSMT2 PE=1 SV=1 && PF03492:SAM dependent carboxyl methyltransferase	MYB_related
Solyc01g106920_3	174.8385803	177.5263891	155.9250148	20.52692405	28.53247999	26.75990475	169.4299947	25.27310293	2.743357484	7.10E-16	1.79E-14	Solyc01g106920_3	1	94521908	94526260	-	2327	protein_coding	NA && sp|P93039|NAT4_ARATH Nucleobase-ascorbate transporter 4 OS=Arabidopsis thaliana OX=3702 GN=NAT4 PE=2 SV=2 && PF00860:Permease family	WRKY
Solyc08g036660_3	437.0964507	388.2487697	514.438735	5.131731012	24.02735157	6.371405892	446.5946518	11.84349616	5.24466666	7.91E-16	1.99E-14	Solyc08g036660_3	8	10494205	10495853	+	613	protein_coding	NA && - && PF06200:tify domain|PF09425:Divergent CCT motif	-
Solyc09g065700_3	280.888211	443.0943208	425.663909	1063.734528	1129.285524	818.7256571	383.2154802	1003.915236	-1.387201994	8.48E-16	2.13E-14	Solyc09g065700_3	9	64173252	64194930	+	12107	protein_coding	NA && sp|F4HZB2|BCHA1_ARATH Protein SPIRRIG OS=Arabidopsis thaliana OX=3702 GN=SPI PE=1 SV=1 && PF02138:Beige/BEACH domain|PF14844:PH domain associated with Beige/BEACH	-
Solyc02g085285_1	372.6068105	183.299605	355.0993038	68.91181644	33.03760841	34.40559182	303.6685731	45.45167222	2.743409651	9.43E-16	2.37E-14	Solyc02g085285_1	2	48878249	48880274	-	288	protein_coding	NA && - && -	-
Solyc11g007170_2	167.6730647	164.5366533	185.5166234	498.5110125	552.6290861	426.2470542	172.5754472	492.4623843	-1.509893457	1.04E-15	2.60E-14	Solyc11g007170_2	11	1602261	1608492	-	2035	protein_coding	NA && sp|Q9ZNT0|VPS4_ARATH Protein SUPPRESSOR OF K(+) TRANSPORT GROWTH DEFECT 1 OS=Arabidopsis thaliana OX=3702 GN=SKD1 PE=1 SV=1 && PF00004:ATPase family associated with various cellular activities (AAA)|PF09336:Vps4 C terminal oligomerisation domain|PF04212:MIT (microtubule interacting and transport) domain|PF17862:AAA+ lid domain	FAR1
Solyc12g005290_2	394.1033572	389.6920736	388.1053288	118.7629177	123.1401768	147.1794761	390.6335866	129.6941902	1.588850974	1.05E-15	2.62E-14	Solyc12g005290_2	12	173193	180706	-	6718	protein_coding	NA && sp|O81832|Y4729_ARATH G-type lectin S-receptor-like serine/threonine-protein kinase At4g27290 OS=Arabidopsis thaliana OX=3702 GN=At4g27290 PE=3 SV=4 && PF01453:D-mannose binding lectin|PF07714:Protein tyrosine kinase|PF00954:S-locus glycoprotein domain|PF11883:Domain of unknown function (DUF3403)|PF08276:PAN-like domain	MYB_related
Solyc11g016970_2	97.45101197	148.6603096	96.7417975	6.597939872	9.761111575	6.371405892	114.284373	7.576819113	3.919493334	1.09E-15	2.72E-14	Solyc11g016970_2	11	7627701	7632851	+	3309	protein_coding	NA && sp|Q9LE20|DTX54_ARATH Protein DETOXIFICATION 54 OS=Arabidopsis thaliana OX=3702 GN=DTX54 PE=2 SV=1 && PF01554:MatE	B3
Solyc02g068120_3	212.0992613	206.3924686	225.3514812	33.72280379	4.505128419	17.20279591	214.6144037	18.47690937	3.537163913	1.15E-15	2.86E-14	Solyc02g068120_3	2	38726135	38731049	-	1482	protein_coding	NA && sp|P37707|B2_DAUCA B2 protein OS=Daucus carota OX=4039 PE=2 SV=1 && PF10539:Development and cell death domain	-
Solyc05g009420_1	686.4563931	998.7663517	974.2468078	313.0355917	370.1713851	395.0271653	886.4898509	359.4113807	1.302649791	1.18E-15	2.92E-14	Solyc05g009420_1	5	3585440	3586381	-	942	protein_coding	NA && - && -	-
novel.1131	204.9337458	154.4335255	145.6817656	24.92555063	24.02735157	12.74281178	168.349679	20.56523799	3.039994853	1.25E-15	3.11E-14	-	8	33929385	33932231	-	2847	-	- && - && -	-
Solyc03g005450_3	220.69788	217.9389004	106.9850466	685.4526423	650.9910566	560.6837185	181.8739424	632.3758058	-1.805954303	1.28E-15	3.17E-14	Solyc03g005450_3	3	338540	346806	+	2640	protein_coding	NA && sp|Q8VYR4|CSLG2_ARATH Cellulose synthase-like protein G2 OS=Arabidopsis thaliana OX=3702 GN=CSLG2 PE=2 SV=1 && PF03552:Cellulose synthase	ARF
Solyc03g119460_3	237.8951174	282.8875794	199.174289	560.8248891	723.0731113	644.7862763	239.9856619	642.8947589	-1.425784956	1.33E-15	3.28E-14	Solyc03g119460_3	3	69551240	69557441	-	4066	protein_coding	NA && - && PF14304:Transcription termination and cleavage factor C-terminal|PF14327:Hinge domain of cleavage stimulation factor subunit 2	NAC
Solyc10g005510_3	809.7032612	881.8587296	785.315768	425.933674	376.9290777	401.3985712	825.6259196	401.420441	1.039538079	1.34E-15	3.30E-14	Solyc10g005510_3	10	413592	427748	-	3271	protein_coding	NA && sp|Q9SAJ6|G3PP1_ARATH Glyceraldehyde-3-phosphate dehydrogenase GAPCP1, chloroplastic OS=Arabidopsis thaliana OX=3702 GN=GAPCP1 PE=1 SV=1 && PF00044:Glyceraldehyde 3-phosphate dehydrogenase, NAD binding domain|PF00270:DEAD/DEAH box helicase|PF02800:Glyceraldehyde 3-phosphate dehydrogenase, C-terminal domain|PF00271:Helicase conserved C-terminal domain	Trihelix
Solyc02g032950_3	163.3737554	80.82502268	89.91296474	499.9772214	388.1918988	452.3698183	111.3705809	446.8463128	-2.009215554	1.37E-15	3.38E-14	Solyc02g032950_3	2	29971480	29973794	-	1810	protein_coding	NA && sp|Q9C519|WRKY6_ARATH WRKY transcription factor 6 OS=Arabidopsis thaliana OX=3702 GN=WRKY6 PE=1 SV=1 && PF03106:WRKY DNA -binding domain	WRKY
Solyc04g007460_3	233.5958081	265.5679317	300.4686417	648.7974207	599.9329345	718.057444	266.5441271	655.5959331	-1.295608397	1.46E-15	3.60E-14	Solyc04g007460_3	4	1123505	1125788	-	2205	protein_coding	NA && - && PF00564:PB1 domain	MYB
Solyc04g074040_3	573.2412469	772.1676274	632.8051695	1489.668202	1196.111595	1344.366643	659.4046813	1343.382147	-1.027488128	1.47E-15	3.62E-14	Solyc04g074040_3	4	60147911	60152706	+	1214	protein_coding	NA && sp|Q9FMG4|SC35_ARATH Serine/arginine-rich splicing factor SC35 OS=Arabidopsis thaliana OX=3702 GN=SC35 PE=1 SV=1 && PF00076:RNA recognition motif. (a.k.a. RRM, RBD, or RNP domain)	ZF-HD
Solyc06g053910_3	34.39447481	54.8455511	81.94599318	258.0527594	345.3931788	309.6503263	57.06200636	304.3654215	-2.400708304	1.54E-15	3.78E-14	Solyc06g053910_3	6	36895482	36897481	-	1794	protein_coding	NA && - && PF04720:PDDEXK-like family of unknown function	-
Solyc02g082260_3	396.9695635	411.3416333	402.9011331	148.0870949	112.6282105	142.719492	403.7374433	134.4782658	1.584944664	1.56E-15	3.83E-14	Solyc02g082260_3	2	46498898	46508848	-	5063	protein_coding	NA && sp|P48020|HMDH1_SOLTU 3-hydroxy-3-methylglutaryl-coenzyme A reductase 1 OS=Solanum tuberosum OX=4113 GN=HMG1 PE=2 SV=1 && PF07992:Pyridine nucleotide-disulphide oxidoreductase	HSF
Solyc03g080190_3	1172.27835	982.8900079	767.1055473	415.6702119	358.1577093	443.4498501	974.0913017	405.7592571	1.260973321	1.72E-15	4.21E-14	Solyc03g080190_3	3	53506807	53511919	-	1655	protein_coding	NA && sp|Q9FLV0|DMR6_ARATH Protein DOWNY MILDEW RESISTANCE 6 OS=Arabidopsis thaliana OX=3702 GN=DMR6 PE=1 SV=1 && PF03171:2OG-Fe(II) oxygenase superfamily|PF14226:non-haem dioxygenase in morphine synthesis N-terminal	STAT
Solyc08g066440_3	722.2839711	751.9613717	500.7810694	214.7995981	272.5602694	206.4335509	658.3421374	231.2644728	1.508268064	1.73E-15	4.24E-14	Solyc08g066440_3	8	55131271	55136349	-	2652	protein_coding	NA && sp|Q99685|MGLL_HUMAN Monoglyceride lipase OS=Homo sapiens OX=9606 GN=MGLL PE=1 SV=2 && PF10604:Polyketide cyclase / dehydrase and lipid transport	G2-like
Solyc01g105280_3	530.2481534	536.9090792	643.0484187	224.3299556	231.2632588	163.7451314	570.0685504	206.4461153	1.468779763	1.81E-15	4.42E-14	Solyc01g105280_3	1	93401882	93406248	+	1066	protein_coding	NA && sp|Q9S9Z7|P2C10_ARATH Probable protein phosphatase 2C 10 OS=Arabidopsis thaliana OX=3702 GN=At1g34750 PE=2 SV=1 && PF00481:Protein phosphatase 2C	CAMTA
Solyc05g008895_1	285.1875203	239.5884601	297.0542253	626.0711834	635.2231071	675.3690245	273.9434019	645.5544383	-1.234469124	1.83E-15	4.47E-14	Solyc05g008895_1	5	3109424	3109711	+	267	protein_coding	NA && sp|P82353|NLTP2_PRUAR Non-specific lipid-transfer protein 2 OS=Prunus armeniaca OX=36596 PE=1 SV=1 && -	bHLH
Solyc09g005500_3	739.4812085	760.6211956	625.9763368	338.6942468	272.5602694	242.7505645	708.6929136	284.6683602	1.315779153	1.86E-15	4.53E-14	Solyc09g005500_3	9	339409	340489	+	786	protein_coding	NA && sp|Q9SSK9|MLP28_ARATH MLP-like protein 28 OS=Arabidopsis thaliana OX=3702 GN=MLP28 PE=1 SV=1 && PF00407:Pathogenesis-related protein Bet v I family	-
Solyc06g060620_3	127.5461774	102.4745823	137.7147941	0	2.25256421	0	122.5785179	0.750854737	7.435013296	1.90E-15	4.62E-14	Solyc06g060620_3	6	38761052	38764437	+	2176	protein_coding	NA && sp|Q05085|PTR7_ARATH Protein NRT1/ PTR FAMILY 6.3 OS=Arabidopsis thaliana OX=3702 GN=NPF6.3 PE=1 SV=1 && PF00854:POT family	C3H
Solyc03g031800_3	282.3213141	428.661281	369.8951081	43.98626581	50.30726735	104.4910566	360.2925677	66.26152993	2.43696525	1.92E-15	4.66E-14	Solyc03g031800_3	3	4308385	4310781	+	1303	protein_coding	NA && sp|Q8L9A9|XTH8_ARATH Probable xyloglucan endotransglucosylase/hydrolase protein 8 OS=Arabidopsis thaliana OX=3702 GN=XTH8 PE=2 SV=2 && PF00722:Glycosyl hydrolases family 16|PF06955:Xyloglucan endo-transglycosylase (XET) C-terminus	GRAS
Solyc02g090220_3	169.1061678	82.26832666	170.7208191	10.26346202	13.51538526	12.74281178	140.6984379	12.17388635	3.532052113	2.01E-15	4.89E-14	Solyc02g090220_3	2	52482018	52482922	+	777	protein_coding	NA && sp|Q39088|DOF34_ARATH Dof zinc finger protein DOF3.4 OS=Arabidopsis thaliana OX=3702 GN=DOF3.4 PE=1 SV=2 && PF02701:Dof domain, zinc finger	Dof
Solyc10g077130_1	335.3461294	330.5166106	278.8440046	101.1684114	60.81923366	66.26262128	314.9022482	76.0834221	2.049220342	2.06E-15	5.00E-14	Solyc10g077130_1	10	60101374	60101991	+	618	protein_coding	NA && - && PF05678:VQ motif	-
Solyc12g008500_2	61.62343404	51.95894315	81.94599318	245.5899841	307.850442	324.3045599	65.17612346	292.581662	-2.157423483	2.22E-15	5.37E-14	Solyc12g008500_2	12	1915182	1918511	+	3131	protein_coding	NA && sp|P47735|RLK5_ARATH Receptor-like protein kinase 5 OS=Arabidopsis thaliana OX=3702 GN=RLK5 PE=1 SV=1 && PF00069:Protein kinase domain|PF08263:Leucine rich repeat N-terminal domain	STAT
Solyc01g017600_3	183.437199	150.1036135	191.2073174	1.46620886	0	0	174.9160433	0.488736287	8.540474899	2.34E-15	5.64E-14	Solyc01g017600_3	1	24247348	24249508	-	1458	protein_coding	NA && - && PF04819:Family of unknown function (DUF716)	-
Solyc11g072580_2	126.1130743	66.39198291	161.6157088	8.797253163	6.006837892	5.097124714	118.0402553	6.633738589	4.162610627	2.62E-15	6.31E-14	Solyc11g072580_2	11	56042971	56045873	-	1931	protein_coding	NA && sp|Q9M1E2|PTR37_ARATH Protein NRT1/ PTR FAMILY 2.7 OS=Arabidopsis thaliana OX=3702 GN=NPF2.7 PE=1 SV=1 && PF00854:POT family	BBR-BPC
Solyc03g063480_2	321.0150982	287.2174913	209.4175381	71.11112973	46.55299366	57.34265303	272.5500426	58.33559214	2.221517297	2.65E-15	6.37E-14	Solyc03g063480_2	3	36815674	36817337	-	732	protein_coding	NA && - && -	-
Solyc03g083960_3	418.4661102	402.6818094	539.4777884	83.57390505	162.9354778	114.0481655	453.5419027	120.1858494	1.918467485	2.72E-15	6.54E-14	Solyc03g083960_3	3	55324035	55328265	-	2211	protein_coding	NA && sp|O64896|TPPA_ARATH Trehalose-phosphate phosphatase A OS=Arabidopsis thaliana OX=3702 GN=TPPA PE=1 SV=1 && PF02358:Trehalose-phosphatase	-
Solyc06g053610_3	38.69378416	10.10312783	13.65766553	208.9347626	181.7068462	206.4335509	20.81819251	199.0250532	-3.27232849	2.94E-15	7.07E-14	Solyc06g053610_3	6	36519369	36522613	-	1302	protein_coding	NA && sp|Q9LTC4|MYB15_ARATH Transcription factor MYB15 OS=Arabidopsis thaliana OX=3702 GN=MYB15 PE=1 SV=1 && PF00249:Myb-like DNA-binding domain	MYB
Solyc04g064530_1	270.8564891	174.6397811	145.6817656	638.5339587	657.7487492	550.4894691	197.0593453	615.5907257	-1.648538511	3.04E-15	7.31E-14	Solyc04g064530_1	4	55697323	55698345	-	1023	protein_coding	NA && - && -	-
Solyc01g010440_3	166.2399616	261.2380197	223.0752037	558.6255758	588.6701134	620.5749339	216.8510617	589.2902077	-1.441917625	3.42E-15	8.19E-14	Solyc01g010440_3	1	5287463	5292953	-	1841	protein_coding	NA && - && -	-
Solyc02g067440_3	96.01790885	75.05180677	171.8589579	443.5281803	502.3218187	445.9984124	114.3095578	463.9494705	-2.008554064	3.59E-15	8.58E-14	Solyc02g067440_3	2	38193260	38197843	-	2091	protein_coding	NA && sp|Q8LGJ5|PCO2_ARATH Plant cysteine oxidase 2 OS=Arabidopsis thaliana OX=3702 GN=PCO2 PE=1 SV=1 && PF07847:PCO_ADO	WRKY
Solyc12g055710_1	169.1061678	119.79423	165.0301252	21.26002848	16.5188042	21.02563944	151.3101743	19.60149071	2.947433227	3.80E-15	9.08E-14	Solyc12g055710_1	12	62632001	62632765	-	765	protein_coding	NA && sp|P0C035|ATL60_ARATH RING-H2 finger protein ATL60 OS=Arabidopsis thaliana OX=3702 GN=ATL60 PE=2 SV=1 && PF13639:Ring finger domain	WOX
Solyc06g053520_3	183.437199	282.8875794	147.9580432	0.73310443	0	0	204.7609405	0.244368143	9.660451693	4.37E-15	1.04E-13	Solyc06g053520_3	6	36397000	36408162	+	1812	protein_coding	NA && sp|Q42963|PMT1_TOBAC Putrescine N-methyltransferase 1 OS=Nicotiana tabacum OX=4097 GN=PMT1 PE=2 SV=1 && PF17284:Spermidine synthase tetramerisation domain|PF01564:Spermine/spermidine synthase domain	NAC
Solyc01g102410_3	267.9902829	284.3308834	325.5076951	695.7161043	801.1620039	615.4778092	292.6096205	704.1186391	-1.263539029	4.71E-15	1.12E-13	Solyc01g102410_3	1	91103329	91111936	-	2505	protein_coding	NA && sp|O82462|SYEC_ARATH Glutamate--tRNA ligase, cytoplasmic OS=Arabidopsis thaliana OX=3702 GN=At5g26710 PE=1 SV=1 && PF03950:tRNA synthetases class I (E and Q), anti-codon binding domain|PF00749:tRNA synthetases class I (E and Q), catalytic domain	bHLH
Solyc05g052280_3	136.1447961	155.8768295	94.46551991	425.933674	509.0795114	382.2843535	128.8290485	439.0991796	-1.776043123	4.74E-15	1.13E-13	Solyc05g052280_3	5	63410974	63414037	-	1260	protein_coding	NA && sp|Q9FLC0|PER52_ARATH Peroxidase 52 OS=Arabidopsis thaliana OX=3702 GN=PER52 PE=2 SV=1 && PF00141:Peroxidase	NAC
Solyc09g090360_3	97.45101197	161.6500454	227.6277588	14.6620886	19.52222315	17.8399365	162.2429387	17.34141608	3.229052317	5.05E-15	1.20E-13	Solyc09g090360_3	9	70337479	70350032	-	4791	protein_coding	NA && sp|Q8S403|PHO1_ARATH Phosphate transporter PHO1 OS=Arabidopsis thaliana OX=3702 GN=PHO1 PE=1 SV=1 && PF03124:EXS family|PF03105:SPX domain	NAC
Solyc10g008280_3	687.8894962	964.1270562	748.8953265	323.2990537	375.4273683	324.9417005	800.3039597	341.2227075	1.229610878	5.18E-15	1.23E-13	Solyc10g008280_3	10	2400135	2407954	-	3429	protein_coding	NA && sp|F4I114|Y1960_ARATH Probable serine/threonine-protein kinase At1g09600 OS=Arabidopsis thaliana OX=3702 GN=At1g09600 PE=3 SV=1 && PF00069:Protein kinase domain	C3H
Solyc07g054300_3	418.4661102	415.6715452	416.5587987	85.04011391	150.1709473	132.5252426	416.898818	122.5787679	1.76557617	5.29E-15	1.26E-13	Solyc07g054300_3	7	62780434	62785464	+	1783	protein_coding	NA && sp|Q8GY60|P2C52_ARATH Probable protein phosphatase 2C 52 OS=Arabidopsis thaliana OX=3702 GN=At4g03415 PE=1 SV=1 && PF00481:Protein phosphatase 2C	B3
Solyc03g082520_1	143.3103117	63.50537496	159.3394312	7.331044302	1.501709473	7.64568707	122.051706	5.492813615	4.460935992	5.56E-15	1.32E-13	Solyc03g082520_1	3	53884510	53884863	-	354	protein_coding	NA && sp|Q9ZUZ3|SAU32_ARATH Auxin-responsive protein SAUR32 OS=Arabidopsis thaliana OX=3702 GN=SAUR32 PE=2 SV=1 && PF02519:Auxin responsive protein	ZF-HD
Solyc03g113100_3	550.311597	402.6818094	429.0783254	1179.565028	937.0667112	954.4366026	460.6905773	1023.689447	-1.152944503	5.66E-15	1.34E-13	Solyc03g113100_3	3	64862411	64868216	-	1134	protein_coding	NA && sp|P42745|UBC2_ARATH Ubiquitin-conjugating enzyme E2 2 OS=Arabidopsis thaliana OX=3702 GN=UBC2 PE=2 SV=1 && PF00179:Ubiquitin-conjugating enzyme	WRKY
Solyc08g007840_2	176.2716834	67.83528689	132.0241001	0	0	0	125.3770235	0	9.917141911	6.00E-15	1.42E-13	Solyc08g007840_2	8	2350854	2352120	-	1050	protein_coding	NA && sp|Q9FJ90|ERF25_ARATH Ethylene-responsive transcription factor ERF025 OS=Arabidopsis thaliana OX=3702 GN=ERF025 PE=2 SV=1 && PF00847:AP2 domain	ERF
Solyc09g056450_3	1261.130743	1840.21257	1489.823682	814.479022	633.7213976	754.3744576	1530.388998	734.1916257	1.059186944	6.52E-15	1.54E-13	Solyc09g056450_3	9	49451765	49455316	-	2321	protein_coding	NA && sp|Q9SRT0|PUB9_ARATH U-box domain-containing protein 9 OS=Arabidopsis thaliana OX=3702 GN=PUB9 PE=1 SV=1 && PF04564:U-box domain	bHLH
Solyc10g006560_3	411.3005946	334.8465225	464.360628	145.8877816	84.84658523	90.47396366	403.5025817	107.0694435	1.916480878	6.54E-15	1.54E-13	Solyc10g006560_3	10	1112151	1113245	-	360	protein_coding	NA && sp|Q9C681|H2A1_ARATH Probable histone H2A.1 OS=Arabidopsis thaliana OX=3702 GN=At1g51060 PE=1 SV=1 && PF16211:C-terminus of histone H2A	GeBP
Solyc03g006220_3	154.7751367	115.4643181	157.0631536	13.19587974	21.77478736	14.65423355	142.4342028	16.54163355	3.110913938	6.72E-15	1.58E-13	Solyc03g006220_3	3	848622	854116	+	1404	protein_coding	NA && sp|Q8VY22|TBL38_ARATH Protein trichome birefringence-like 38 OS=Arabidopsis thaliana OX=3702 GN=TBL38 PE=2 SV=1 && PF13839:GDSL/SGNH-like Acyl-Esterase family found in Pmr5 and Cas1p	BES1
Solyc03g116700_3	143.3103117	183.299605	316.4025848	635.601541	770.3769597	758.1973011	214.3375005	721.3919339	-1.742712877	6.76E-15	1.59E-13	Solyc03g116700_3	3	67477035	67477829	+	694	protein_coding	NA && sp|P29602|CPC_CUCSA Cucumber peeling cupredoxin OS=Cucumis sativus OX=3659 PE=1 SV=3 && PF02298:Plastocyanin-like domain	HD-ZIP
Solyc01g104400_3	1509.057582	1528.458911	1319.102862	821.8100663	575.1547282	763.2944258	1452.206452	720.0864068	1.010734282	6.88E-15	1.62E-13	Solyc01g104400_3	1	92669228	92671766	-	609	protein_coding	NA && sp|P00303|BABL_CUCSA Basic blue protein OS=Cucumis sativus OX=3659 PE=1 SV=1 && PF02298:Plastocyanin-like domain	MYB
Solyc02g082950_3	303.8178608	386.8054657	434.7690194	54.24972784	116.3824842	90.47396366	375.130782	87.03539189	2.109108361	7.44E-15	1.75E-13	Solyc02g082950_3	2	47116964	47121365	+	1938	protein_coding	NA && sp|O80919|TBL34_ARATH Protein trichome birefringence-like 34 OS=Arabidopsis thaliana OX=3702 GN=TBL34 PE=2 SV=2 && PF13839:GDSL/SGNH-like Acyl-Esterase family found in Pmr5 and Cas1p|PF14416:PMR5 N terminal Domain|PF00182:Chitinase class I	BES1
Solyc03g031920_3	100.3172182	64.94867894	91.05110353	383.413617	261.2974483	408.4071177	85.43900022	351.0393943	-2.037113296	8.94E-15	2.09E-13	Solyc03g031920_3	3	4403126	4410101	-	2863	protein_coding	NA && sp|Q9SHY2|YSL7_ARATH Probable metal-nicotianamine transporter YSL7 OS=Arabidopsis thaliana OX=3702 GN=YSL7 PE=2 SV=1 && PF03169:OPT oligopeptide transporter protein	TCP
Solyc01g105770_2	385.5047385	191.9594289	273.1533106	52.05041455	67.57692629	38.86557594	283.5391593	52.83097226	2.427605341	9.76E-15	2.27E-13	Solyc01g105770_2	1	93713424	93714930	-	1507	protein_coding	NA && - && -	-
Solyc01g112260_3	194.9020239	339.1764345	290.2253925	63.78008543	37.54273683	61.16549656	274.7679503	54.16277294	2.340980109	9.83E-15	2.29E-13	Solyc01g112260_3	1	98249777	98250455	-	544	protein_coding	NA && - && -	-
Solyc03g051790_3	243.6275299	342.0630424	391.5197452	71.84423416	21.02393262	59.89121538	325.7367725	50.91979406	2.675655848	1.00E-14	2.33E-13	Solyc03g051790_3	3	22840224	22846532	+	2930	protein_coding	NA && - && -	-
Solyc12g040680_2	882.7915202	705.7756445	745.4809102	364.3529018	382.1850609	324.9417005	778.0160249	357.1598877	1.12363229	1.01E-14	2.34E-13	Solyc12g040680_2	12	55772239	55779983	+	2641	protein_coding	NA && sp|Q9LV37|MPK9_ARATH Mitogen-activated protein kinase 9 OS=Arabidopsis thaliana OX=3702 GN=MPK9 PE=2 SV=2 && PF00069:Protein kinase domain	HB-other
Solyc02g082920_3	186.3034052	294.4340112	284.5346985	49.85110125	64.57350734	39.50271653	255.090705	51.30910837	2.318396385	1.07E-14	2.49E-13	CHI3	2	47106241	47107335	+	961	protein_coding	NA && sp|Q05539|CHIA_SOLLC Acidic 26 kDa endochitinase OS=Solanum lycopersicum OX=4081 GN=CHI3 PE=1 SV=1 && PF00182:Chitinase class I	NAC
Solyc09g074460_2	470.0578224	509.4863037	515.5768737	930.3095219	1168.32997	939.1452285	498.3736666	1012.594907	-1.02164432	1.15E-14	2.67E-13	Solyc09g074460_2	9	66685095	66686228	+	885	protein_coding	NA && sp|Q9SPL2|CIP8_ARATH E3 ubiquitin-protein ligase CIP8 OS=Arabidopsis thaliana OX=3702 GN=CIP8 PE=1 SV=1 && PF13639:Ring finger domain|PF14369:zinc-ribbon	bZIP
Solyc04g072240_3	316.7157889	457.5273605	275.4295882	909.7825979	827.4419196	855.6798113	349.8909125	864.3014429	-1.308766025	1.16E-14	2.68E-13	Solyc04g072240_3	4	59328834	59346902	+	2855	protein_coding	NA && sp|Q9SZ83|Y4967_ARATH Uncharacterized oxidoreductase At4g09670 OS=Arabidopsis thaliana OX=3702 GN=At4g09670 PE=1 SV=1 && PF01408:Oxidoreductase family, NAD-binding Rossmann fold	-
Solyc01g015080_3	75.95446521	66.39198291	152.5105984	2.932417721	3.003418946	0	98.28568218	1.978612222	5.686848093	1.23E-14	2.85E-13	Solyc01g015080_3	1	16711704	16715127	-	2072	protein_coding	NA && sp|Q42517|PERN_ARMRU Peroxidase N OS=Armoracia rusticana OX=3704 GN=HRPN PE=2 SV=1 && PF00141:Peroxidase	NAC
Solyc02g081190_3	742.3474147	620.6207099	669.225611	228.7285822	332.6286483	245.9362674	677.3979118	269.0978326	1.332800895	1.24E-14	2.87E-13	Solyc02g081190_3	2	45806081	45807784	+	1295	protein_coding	NA && sp|P31237|ACCO_ACTDE 1-aminocyclopropane-1-carboxylate oxidase OS=Actinidia deliciosa OX=3627 GN=ACO PE=2 SV=1 && PF14226:non-haem dioxygenase in morphine synthesis N-terminal|PF03171:2OG-Fe(II) oxygenase superfamily	STAT
Solyc01g008560_3	596.1708967	476.2903122	589.5558954	131.9587974	229.7615494	186.6821926	554.0057014	182.8008465	1.600413027	1.41E-14	3.25E-13	Solyc01g008560_3	1	2590640	2598580	-	2036	protein_coding	NA && sp|Q56YN3|NADK1_ARATH NAD(H) kinase 1 OS=Arabidopsis thaliana OX=3702 GN=NADK1 PE=1 SV=2 && PF01513:ATP-NAD kinase	-
Solyc05g013880_1	938.6825417	676.9095649	803.5259887	387.8122436	356.6559998	330.0388252	806.3726984	358.1690229	1.171425106	1.44E-14	3.31E-13	Solyc05g013880_1	5	7319712	7320989	-	1278	protein_coding	NA && sp|O48716|JGB_ARATH Protein JINGUBANG OS=Arabidopsis thaliana OX=3702 GN=JGB PE=1 SV=1 && -	Dof
Solyc09g007790_1	42.99309351	14.43303976	40.97299659	190.6071519	224.5055662	265.6876257	32.79970996	226.9334479	-2.780576997	1.46E-14	3.35E-13	Solyc09g007790_1	9	1315466	1315942	+	477	protein_coding	NA && - && PF04520:Senescence regulator	-
Solyc02g069310_3	546.0122876	571.5483747	591.832173	257.319655	210.2393262	254.2190951	569.7976118	240.5926921	1.243576632	1.50E-14	3.44E-13	Solyc02g069310_3	2	39807499	39815115	+	4767	protein_coding	NA && sp|E7BQV0|NPR1_MALHU BTB/POZ domain and ankyrin repeat-containing protein NPR1 OS=Malus hupehensis OX=106556 GN=NPR1 PE=2 SV=2 && PF12313:NPR1/NIM1 like defence protein C terminal|PF12796:Ankyrin repeats (3 copies)|PF00651:BTB/POZ domain	MYB
Solyc04g005490_3	399.8357697	503.7130878	602.0754221	189.8740474	177.9525726	168.8422561	501.8747599	178.8896254	1.490915182	1.56E-14	3.57E-13	Solyc04g005490_3	4	324730	332743	+	2343	protein_coding	NA && sp|A7T167|GDAP2_NEMVE Protein GDAP2 homolog OS=Nematostella vectensis OX=45351 GN=gdap2 PE=3 SV=1 && PF13716:Divergent CRAL/TRIO domain|PF01661:Macro domain	-
Solyc09g083280_3	299.5185515	411.3416333	324.3695563	118.7629177	84.09573049	89.19968249	345.0765804	97.35277689	1.82558543	1.56E-14	3.57E-13	Solyc09g083280_3	9	69358391	69360237	-	1192	protein_coding	NA && sp|P33077|IAA4_ARATH Auxin-responsive protein IAA4 OS=Arabidopsis thaliana OX=3702 GN=IAA4 PE=1 SV=2 && PF02309:AUX/IAA family	ARF
Solyc08g008290_3	210.6661582	122.680838	276.567727	701.5809397	608.9431913	672.8204622	203.3049077	661.1148644	-1.69439705	1.64E-14	3.74E-13	Solyc08g008290_3	8	2714616	2715695	+	1080	protein_coding	NA && - && -	-
Solyc09g082970_3	209.2330551	204.9491647	184.3784847	482.3827151	482.7995956	614.8406686	199.5202348	526.6743264	-1.403208835	1.66E-14	3.79E-13	Solyc09g082970_3	9	69068382	69077183	+	2499	protein_coding	NA && sp|Q40545|KPYA_TOBAC Pyruvate kinase isozyme A, chloroplastic OS=Nicotiana tabacum OX=4097 PE=2 SV=1 && PF02887:Pyruvate kinase, alpha/beta domain|PF00224:Pyruvate kinase, barrel domain	-
Solyc01g103030_3	174.8385803	213.6089885	178.6877907	23.45934177	21.02393262	42.05127889	189.0451198	28.84485109	2.703482681	1.67E-14	3.81E-13	Solyc01g103030_3	1	91573973	91578496	-	2059	protein_coding	NA && sp|Q93VV5|PTR16_ARATH Protein NRT1/ PTR FAMILY 4.3 OS=Arabidopsis thaliana OX=3702 GN=NPF4.3 PE=2 SV=1 && PF00854:POT family	ERF
Solyc02g090120_1	24.36275299	60.61876701	13.65766553	714.043715	602.9363534	717.4203034	32.87972851	678.1334573	-4.376938895	1.77E-14	4.04E-13	Solyc02g090120_1	2	52381758	52382018	-	261	protein_coding	NA && - && -	-
Solyc07g053350_3	260.8247673	365.155906	251.5286735	52.05041455	86.3482947	63.71405892	292.5031156	67.37092272	2.118114149	1.93E-14	4.40E-13	Solyc07g053350_3	7	61933071	61938088	+	1142	protein_coding	NA && sp|Q9SIN2|TBL39_ARATH Protein trichome birefringence-like 39 OS=Arabidopsis thaliana OX=3702 GN=TBL39 PE=2 SV=1 && PF14416:PMR5 N terminal Domain|PF13839:GDSL/SGNH-like Acyl-Esterase family found in Pmr5 and Cas1p	BES1
Solyc12g098310_2	283.7544172	239.5884601	348.270471	640.733272	713.3119997	751.1887547	290.5377828	701.7446755	-1.267813857	2.43E-14	5.51E-13	Solyc12g098310_2	12	66849838	66852488	+	1099	protein_coding	NA && sp|Q7XDH8|KRP4_ORYSJ Cyclin-dependent kinase inhibitor 4 OS=Oryza sativa subsp. japonica OX=39947 GN=KRP4 PE=2 SV=2 && PF02234:Cyclin-dependent kinase inhibitor	B3
Solyc12g087950_1	322.4482014	239.5884601	250.3905347	74.04354745	51.80897682	72.63402717	270.8090654	66.16218381	2.030641933	2.82E-14	6.40E-13	Solyc12g087950_1	12	64432737	64433537	-	801	protein_coding	NA && sp|Q9LTA2|AHL17_ARATH AT-hook motif nuclear-localized protein 17 OS=Arabidopsis thaliana OX=3702 GN=AHL17 PE=2 SV=1 && PF03479:Plants and Prokaryotes Conserved (PCC) domain	NAC
Solyc11g005150_2	563.209525	492.166656	612.3186712	194.272674	220.7512925	251.0333921	555.8982841	222.0191196	1.324158407	2.89E-14	6.54E-13	Solyc11g005150_2	11	138523	140798	+	1449	protein_coding	NA && sp|O48809|LRX2_ARATH Leucine-rich repeat extensin-like protein 2 OS=Arabidopsis thaliana OX=3702 GN=LRX2 PE=1 SV=1 && PF13855:Leucine rich repeat	C3H
Solyc02g081970_3	180.5709928	183.299605	209.4175381	488.2475505	458.0213893	511.6238931	191.0960453	485.9642776	-1.343956705	3.09E-14	6.99E-13	Solyc02g081970_3	2	46274126	46278331	-	2561	protein_coding	NA && sp|Q9FYH7|VSR6_ARATH Vacuolar-sorting receptor 6 OS=Arabidopsis thaliana OX=3702 GN=VSR6 PE=2 SV=3 && PF02225:PA domain	WRKY
Solyc09g005250_3	143.3103117	124.124142	146.8199044	18.32761076	21.02393262	17.20279591	138.084786	18.85144643	2.875875785	3.09E-14	6.99E-13	Solyc09g005250_3	9	183092	195458	-	2882	protein_coding	NA && sp|Q93Z81|CAX3_ARATH Vacuolar cation/proton exchanger 3 OS=Arabidopsis thaliana OX=3702 GN=CAX3 PE=1 SV=1 && PF01699:Sodium/calcium exchanger protein|PF00153:Mitochondrial carrier protein	ERF
Solyc06g008880_3	295.2192421	267.0112356	254.9430899	596.0139018	588.6701134	696.394664	272.3911892	627.0262264	-1.205074606	3.40E-14	7.67E-13	Solyc06g008880_3	6	2811547	2830731	+	3257	protein_coding	NA && sp|Q40153|LE14B_LITER LEC14B protein OS=Lithospermum erythrorhizon OX=34254 PE=2 SV=1 && PF07859:alpha/beta hydrolase fold	SBP
Solyc02g069190_3	17.19723741	23.09286362	15.93394312	163.4822879	228.2598399	115.9595872	18.74134805	169.233905	-3.181317343	3.62E-14	8.15E-13	Solyc02g069190_3	2	39722725	39724911	+	1053	protein_coding	NA && sp|Q8W245|ZIP10_ARATH Probable zinc transporter 10 OS=Arabidopsis thaliana OX=3702 GN=ZIP10 PE=1 SV=2 && PF02535:ZIP Zinc transporter	NF-YC
Solyc09g090520_3	455.7267913	574.4349826	447.2885461	1054.204171	916.0427785	1005.40785	492.48344	991.884933	-1.012254524	3.95E-14	8.88E-13	Solyc09g090520_3	9	70498531	70501314	-	1480	protein_coding	NA && sp|Q8W034|RNP1_ARATH Heterogeneous nuclear ribonucleoprotein 1 OS=Arabidopsis thaliana OX=3702 GN=RNP1 PE=1 SV=1 && PF00076:RNA recognition motif. (a.k.a. RRM, RBD, or RNP domain)	bHLH
Solyc01g006950_3	762.4108583	743.3015479	771.6581024	276.3803702	365.6662567	381.0100723	759.1235029	341.0188997	1.153841026	4.17E-14	9.35E-13	Solyc01g006950_3	1	1515155	1517487	-	1563	protein_coding	NA && sp|Q9ZSD4|SY121_ARATH Syntaxin-121 OS=Arabidopsis thaliana OX=3702 GN=SYP121 PE=1 SV=1 && PF00804:Syntaxin|PF05739:SNARE domain	NAC
Solyc04g078640_2	515.9171222	594.6412383	435.9071582	210.4009715	198.9765052	197.5135826	515.4885062	202.2970198	1.347699245	4.52E-14	1.01E-12	Solyc04g078640_2	4	63416461	63418883	+	2132	protein_coding	NA && sp|Q9FH94|ERF10_ARATH Ethylene-responsive transcription factor ERF010 OS=Arabidopsis thaliana OX=3702 GN=ERF010 PE=2 SV=1 && PF00847:AP2 domain	ERF
Solyc06g075660_3	643.4632996	585.9814144	715.8893015	138.5567373	235.0175325	269.5104692	648.4446718	214.3615797	1.596106116	4.79E-14	1.07E-12	Solyc06g075660_3	6	47160989	47162126	-	712	protein_coding	NA && sp|Q9LX82|MYB48_ARATH Transcription factor MYB48 OS=Arabidopsis thaliana OX=3702 GN=MYB48 PE=2 SV=1 && PF00249:Myb-like DNA-binding domain	MYB
Solyc11g011110_2	84.55308391	128.4540539	70.56460524	0	0	3.822843535	94.52391435	1.274281178	6.109708705	5.14E-14	1.15E-12	Solyc11g011110_2	11	4195109	4197999	-	1129	protein_coding	NA && sp|Q9FHQ1|GDL80_ARATH GDSL esterase/lipase At5g37690 OS=Arabidopsis thaliana OX=3702 GN=At5g37690 PE=2 SV=1 && PF00657:GDSL-like Lipase/Acylhydrolase	HB-PHD
Solyc08g078670_2	219.2647769	259.7947158	174.1352355	527.8351898	639.7282355	548.5780473	217.7315761	572.0471575	-1.398391894	5.22E-14	1.16E-12	Solyc08g078670_2	8	62570510	62572436	+	1741	protein_coding	NA && sp|Q940R4|ASP63_ARATH Probable aspartyl protease At4g16563 OS=Arabidopsis thaliana OX=3702 GN=At4g16563 PE=2 SV=1 && PF14543:Xylanase inhibitor N-terminal|PF14541:Xylanase inhibitor C-terminal	G2-like
Solyc03g093540_1	31.52826858	21.64955965	5.690693971	244.8568797	171.1948799	163.1079908	19.62284073	193.0532502	-3.329660498	5.24E-14	1.17E-12	Solyc03g093540_1	3	56335555	56336241	-	687	protein_coding	NA && sp|Q40478|ERF5_TOBAC Ethylene-responsive transcription factor 5 OS=Nicotiana tabacum OX=4097 GN=ERF5 PE=2 SV=1 && PF00847:AP2 domain	ERF
Solyc04g071990_3	444.2619663	421.4447611	299.3305029	107.0332468	72.83290944	130.6138208	388.3457434	103.4933257	1.902919921	5.40E-14	1.20E-12	Solyc04g071990_3	4	59098772	59140862	-	4358	protein_coding	NA && sp|Q9SQI2|GIGAN_ARATH Protein GIGANTEA OS=Arabidopsis thaliana OX=3702 GN=GI PE=1 SV=2 && -	-
Solyc05g052520_3	726.5832804	751.9613717	654.4298066	306.4376518	352.1508714	238.2905804	710.9914862	298.9597012	1.250864007	5.50E-14	1.22E-12	Solyc05g052520_3	5	63597744	63599919	-	1396	protein_coding	NA && sp|O80871|P2C25_ARATH Probable protein phosphatase 2C 25 OS=Arabidopsis thaliana OX=3702 GN=At2g30020 PE=1 SV=1 && PF00481:Protein phosphatase 2C	NAC
Solyc06g010033_1	394.1033572	521.0327355	376.7239409	164.2153924	99.11282522	127.4281178	430.6200112	130.2521118	1.723719014	6.00E-14	1.33E-12	Solyc06g010033_1	6	4786114	4791546	+	1591	protein_coding	NA && sp|Q94KB7|MLO6_ARATH MLO-like protein 6 OS=Arabidopsis thaliana OX=3702 GN=MLO6 PE=2 SV=2 && PF03094:Mlo family	ARF
Solyc12g014350_2	118.9475587	101.0312783	150.2343208	349.6908132	397.9530104	418.6013671	123.404386	388.7483969	-1.649111371	6.54E-14	1.45E-12	Solyc12g014350_2	12	5158145	5161283	-	2108	protein_coding	NA && sp|C0LGG8|Y5343_ARATH Probable LRR receptor-like serine/threonine-protein kinase At1g53430 OS=Arabidopsis thaliana OX=3702 GN=At1g53430 PE=1 SV=1 && PF07714:Protein tyrosine kinase|PF11721:Malectin domain	ERF
Solyc06g072210_1	0	0	0	223.5968512	142.6623999	109.5881813	0	158.6158108	-9.339643243	6.73E-14	1.49E-12	Solyc06g072210_1	6	44642482	44643066	-	585	protein_coding	NA && sp|Q9LMU2|KTI5_ARATH Kunitz trypsin inhibitor 5 OS=Arabidopsis thaliana OX=3702 GN=KTI5 PE=2 SV=1 && PF00197:Trypsin and protease inhibitor	-
Solyc07g042590_3	272.2895923	398.3518975	269.7388942	99.70220251	63.8226526	71.35974599	313.460128	78.29486703	2.000521127	6.87E-14	1.52E-12	Solyc07g042590_3	7	56176534	56178725	-	1636	protein_coding	NA && sp|Q8H1E3|PBL17_ARATH Probable serine/threonine-protein kinase PBL17 OS=Arabidopsis thaliana OX=3702 GN=PBL17 PE=1 SV=1 && PF00069:Protein kinase domain	Trihelix
Solyc07g043250_1	149.0427242	128.4540539	55.76880091	405.4067499	488.8064335	468.9354736	111.0885263	454.3828857	-2.043436948	7.02E-14	1.55E-12	Solyc07g043250_1	7	57035478	57035960	-	483	protein_coding	NA && sp|Q9LIE6|VQ22_ARATH VQ motif-containing protein 22 OS=Arabidopsis thaliana OX=3702 GN=VQ22 PE=2 SV=1 && PF05678:VQ motif	-
Solyc08g074750_2	316.7157889	280.0009714	252.6668123	604.8111549	706.5543071	623.1234962	283.1278575	644.8296527	-1.189979752	7.09E-14	1.57E-12	Solyc08g074750_2	8	59007389	59012073	-	551	protein_coding	NA && - && -	C2H2
Solyc12g088210_2	385.5047385	310.3103549	368.7569693	91.63805378	102.8670989	133.1623831	354.8573542	109.2225119	1.697915331	7.35E-14	1.62E-12	Solyc12g088210_2	12	64626631	64638421	+	4060	protein_coding	NA && sp|A0A1P8AWH8|XYN1_ARATH Endo-1,4-beta-xylanase 1 OS=Arabidopsis thaliana OX=3702 GN=XYN1 PE=1 SV=1 && PF02018:Carbohydrate binding domain|PF05770:Inositol 1,3,4-trisphosphate 5/6-kinase ATP-grasp domain|PF17927:Inositol 1,3,4-trisphosphate 5/6-kinase pre-ATP-grasp domain|PF00331:Glycosyl hydrolase family 10	NAC
novel.1323	87.41929015	72.16519882	99.01807509	274.1810569	303.3453136	354.8873082	86.20085469	310.8045595	-1.845709767	7.64E-14	1.68E-12	-	SL3.00SC0000654	3458	4112	-	557	-	- && - && -	-
ENSRNA050029692	51.59171222	144.3303976	112.6757406	0	0	0	102.8659502	0	9.631718539	8.53E-14	1.88E-12	U5	1	88223896	88224012	+	117	snRNA	U5 spliceosomal RNA && - && -	-
Solyc11g044470_2	654.9281245	531.1358633	597.5228669	150.2864082	217.7478736	261.8647822	594.5289516	209.9663546	1.499874606	9.01E-14	1.98E-12	Solyc11g044470_2	11	32850987	32858145	-	2522	protein_coding	NA && sp|Q9M1S3|ARP1_ARATH Probable RNA-binding protein ARP1 OS=Arabidopsis thaliana OX=3702 GN=ARP1 PE=2 SV=1 && PF00076:RNA recognition motif. (a.k.a. RRM, RBD, or RNP domain)	G2-like
Solyc06g060080_2	394.1033572	463.3005764	340.3034994	142.2222595	147.1675284	119.7824308	399.235811	136.3907395	1.549129587	9.27E-14	2.03E-12	Solyc06g060080_2	6	38106829	38112011	+	505	protein_coding	NA && sp|P80497|ATPY_SOLTU ATP synthase 6 kDa subunit, mitochondrial (Fragment) OS=Solanum tuberosum OX=4113 PE=1 SV=1 && -	-
Solyc02g079540_2	14.33103117	27.42277555	13.65766553	159.8167658	128.3961599	186.6821926	18.47049075	158.2983728	-3.113907801	9.49E-14	2.08E-12	Solyc02g079540_2	2	44624762	44628539	+	3235	protein_coding	NA && sp|Q9LPZ9|SD113_ARATH G-type lectin S-receptor-like serine/threonine-protein kinase SD1-13 OS=Arabidopsis thaliana OX=3702 GN=SD113 PE=1 SV=2 && PF01453:D-mannose binding lectin|PF00954:S-locus glycoprotein domain|PF11883:Domain of unknown function (DUF3403)|PF08276:PAN-like domain|PF07714:Protein tyrosine kinase	MYB_related
Solyc01g103630_3	121.813765	220.8255084	64.87391127	5.864835442	13.51538526	4.459984124	135.8377282	7.946734941	4.105212612	9.63E-14	2.11E-12	Solyc01g103630_3	1	92066472	92067203	-	618	protein_coding	NA && - && -	NAC
Solyc02g062890_2	63.05653716	60.61876701	104.7087691	312.3024873	279.317962	327.4902628	76.12802441	306.3702374	-1.996963969	9.70E-14	2.12E-12	Solyc02g062890_2	2	35380590	35382942	-	1746	protein_coding	NA && sp|Q8GXR2|PLT6_ARATH Probable polyol transporter 6 OS=Arabidopsis thaliana OX=3702 GN=PLT6 PE=2 SV=2 && PF00083:Sugar (and other) transporter	GRAS
Solyc02g081580_3	97.45101197	101.0312783	158.2012924	412.0046898	431.7414735	353.613027	118.8945276	399.1197301	-1.737510203	9.79E-14	2.14E-12	Solyc02g081580_3	2	46029722	46032395	-	1021	protein_coding	NA && sp|Q93V51|PSE1_ARATH Protein LEAD-SENSITIVE 1 OS=Arabidopsis thaliana OX=3702 GN=PSE1 PE=2 SV=1 && PF04970:Lecithin retinol acyltransferase	ERF
Solyc12g098753_1	202.0675395	184.742909	273.1533106	509.507579	620.2060124	611.6549656	219.9879197	580.4561857	-1.394103102	1.02E-13	2.23E-12	Solyc12g098753_1	12	67147362	67154551	-	2535	protein_coding	NA && - && PF01190:Pollen proteins Ole e I like	-
Solyc01g111400_3	88.85239326	184.742909	125.1952674	419.3357341	424.9837809	567.692265	132.9301899	470.6705933	-1.826227398	1.03E-13	2.23E-12	Solyc01g111400_3	1	97574237	97576555	+	2319	protein_coding	NA && sp|O49607|SBT16_ARATH Subtilisin-like protease SBT1.6 OS=Arabidopsis thaliana OX=3702 GN=SBT1.6 PE=2 SV=1 && PF00082:Subtilase family|PF02225:PA domain|PF17766:Fibronectin type-III domain|PF05922:Peptidase inhibitor I9	bHLH
Solyc03g113130_3	25.79585611	60.61876701	59.1832173	194.272674	339.3863409	291.8103898	48.53261347	275.1564683	-2.496570562	1.05E-13	2.29E-12	Solyc03g113130_3	3	64882804	64886286	-	1341	protein_coding	NA && sp|Q8LGJ5|PCO2_ARATH Plant cysteine oxidase 2 OS=Arabidopsis thaliana OX=3702 GN=PCO2 PE=1 SV=1 && PF07847:PCO_ADO	WRKY
Solyc10g007960_1	331.0468201	342.0630424	363.0662753	89.43874049	61.57008839	122.9681337	345.3920459	91.3256542	1.915470247	1.06E-13	2.30E-12	AOS3	10	2110666	2112141	-	1476	protein_coding	NA && sp|Q8GZP5|AOS3_SOLLC Allene oxide synthase 3 OS=Solanum lycopersicum OX=4081 GN=AOS3 PE=1 SV=1 && PF00067:Cytochrome P450	C3H
Solyc12g010420_1	805.4039518	780.8274512	896.8533698	78.44217403	87.09914944	25.48562357	827.6949243	63.67564901	3.703015257	1.09E-13	2.37E-12	Solyc12g010420_1	12	3460553	3460723	-	171	protein_coding	NA && - && -	-
novel.1277	98.88411508	76.49511075	103.5706303	0	0	0	92.98328537	0	9.486457969	1.10E-13	2.39E-12	-	SL3.00SC0000009	649222	668174	-	576	-	- && - && -	-
Solyc09g066430_3	981.6756353	1300.416883	1193.907595	488.980655	602.1854987	631.4063239	1158.666704	574.1908258	1.012560772	1.21E-13	2.61E-12	Solyc09g066430_3	9	65082809	65085348	+	971	protein_coding	NA && sp|P55844|RL14_PEA Probable 60S ribosomal protein L14 OS=Pisum sativum OX=3888 PE=2 SV=1 && PF01929:Ribosomal protein L14	CAMTA
Solyc12g056550_1	594.7377936	676.9095649	479.1564323	250.7217151	238.0209515	230.0077527	583.6012636	239.5834731	1.282667154	1.23E-13	2.67E-12	Solyc12g056550_1	12	63454758	63455894	+	1137	protein_coding	NA && sp|Q9CAK4|ROH1_ARATH Protein ROH1 OS=Arabidopsis thaliana OX=3702 GN=ROH1 PE=1 SV=1 && PF05633:Protein BYPASS1-related	-
Solyc04g078390_2	273.7226954	197.7326448	244.6998407	563.0242024	737.3393513	549.8523285	238.7183936	616.7386274	-1.368172179	1.24E-13	2.68E-12	Solyc04g078390_2	4	63217023	63217673	+	591	protein_coding	NA && sp|Q9STX3|GID2_ARATH F-box protein GID2 OS=Arabidopsis thaliana OX=3702 GN=GID2 PE=1 SV=1 && PF12937:F-box-like	MYB_related
Solyc02g063330_3	96.01790885	125.5674459	63.73577247	0	0	0	95.10704242	0	9.515414566	1.27E-13	2.74E-12	Solyc02g063330_3	2	35943052	35947022	+	3138	protein_coding	NA && sp|Q5XF57|Y5576_ARATH Probable receptor-like serine/threonine-protein kinase At5g57670 OS=Arabidopsis thaliana OX=3702 GN=At5g57670 PE=2 SV=1 && PF00069:Protein kinase domain	C3H
Solyc12g089350_2	88.85239326	66.39198291	128.6096837	0	0	0	94.61801997	0	9.513423052	1.30E-13	2.81E-12	Solyc12g089350_2	12	65463260	65466962	+	1083	protein_coding	NA && sp|Q94CH6|EXL3_ARATH GDSL esterase/lipase EXL3 OS=Arabidopsis thaliana OX=3702 GN=EXL3 PE=2 SV=1 && PF00657:GDSL-like Lipase/Acylhydrolase	ERF
Solyc02g079810_2	98.88411508	80.82502268	87.63668715	4.398626581	0	0	89.11527497	1.46620886	5.965760864	1.34E-13	2.88E-12	Solyc02g079810_2	2	44794468	44796350	-	1671	protein_coding	NA && - && -	bHLH
Solyc03g116710_3	189.1696115	186.186213	226.48962	51.31731012	36.04102735	40.13985712	200.6151482	42.4993982	2.240886624	1.38E-13	2.97E-12	Solyc03g116710_3	3	67484641	67485631	-	883	protein_coding	NA && sp|Q9SSC7|LOR5_ARATH Protein LURP-one-related 5 OS=Arabidopsis thaliana OX=3702 GN=At1g80120 PE=2 SV=1 && PF04525:LURP-one-related	-
Solyc12g043120_2	444.2619663	297.3206191	348.270471	870.1949587	727.5782397	905.3767772	363.2843522	834.3833252	-1.200637819	1.46E-13	3.11E-12	Solyc12g043120_2	12	59713533	59719681	-	3154	protein_coding	NA && sp|Q9S7C0|HSP7O_ARATH Heat shock 70 kDa protein 14 OS=Arabidopsis thaliana OX=3702 GN=HSP70-14 PE=1 SV=1 && PF00012:Hsp70 protein	LBD
Solyc02g067580_3	212.0992613	382.4755537	300.4686417	776.3575916	722.3222565	762.6572853	298.3478189	753.7790445	-1.337243799	1.60E-13	3.42E-12	Solyc02g067580_3	2	38306368	38308626	+	739	protein_coding	NA && - && -	-
Solyc02g090630_3	224.9971894	209.2790766	166.1682639	17.59450633	40.54615577	39.50271653	200.1481766	32.54779288	2.61648767	1.65E-13	3.53E-12	Solyc02g090630_3	2	52815851	52823550	+	4098	protein_coding	NA && sp|O48723|PLP2_ARATH Patatin-like protein 2 OS=Arabidopsis thaliana OX=3702 GN=PLP2 PE=1 SV=1 && PF01734:Patatin-like phospholipase	-
Solyc08g077060_3	34.39447481	17.31964772	45.52555177	228.7285822	198.2256504	184.7707709	32.41322476	203.9083345	-2.63624513	1.66E-13	3.54E-12	Solyc08g077060_3	8	61116131	61120772	-	1168	protein_coding	NA && sp|Q0J7V9|LSD1_ORYSJ Protein LSD1 OS=Oryza sativa subsp. japonica OX=39947 GN=LSD1 PE=2 SV=1 && PF06943:LSD1 zinc finger	LSD
Solyc04g008430_1	111.7820431	72.16519882	55.76880091	335.0287246	280.0688167	345.9673399	79.90534762	320.3549604	-2.012580975	1.75E-13	3.72E-12	Solyc04g008430_1	4	2048714	2052094	-	3381	protein_coding	NA && sp|Q9ZPS9|BRL2_ARATH Serine/threonine-protein kinase BRI1-like 2 OS=Arabidopsis thaliana OX=3702 GN=BRL2 PE=1 SV=1 && PF00069:Protein kinase domain|PF08263:Leucine rich repeat N-terminal domain|PF13855:Leucine rich repeat	SBP
Solyc02g021400_2	521.6495346	490.723352	619.147504	246.3230886	227.5089852	199.4250044	543.8401302	224.419026	1.279796285	1.77E-13	3.75E-12	Solyc02g021400_2	2	23095711	23097355	+	349	protein_coding	NA && sp|P46302|RS28_MAIZE 40S ribosomal protein S28 OS=Zea mays OX=4577 GN=RPS28 PE=3 SV=1 && -	bHLH
Solyc05g051000_3	441.3957601	467.6304884	559.9642867	206.0023449	156.1777852	114.6853061	489.6635117	158.9551454	1.626641831	1.80E-13	3.82E-12	Solyc05g051000_3	5	62054207	62057393	-	824	protein_coding	NA && sp|P62302|RS13_SOYBN 40S ribosomal protein S13 OS=Glycine max OX=3847 GN=RPS13 PE=2 SV=1 && PF00312:Ribosomal protein S15|PF08069:Ribosomal S13/S15 N-terminal domain	TCP
Solyc03g113350_3	91.7185995	112.5777102	218.5226485	533.7000252	467.7825008	574.0636709	140.9396527	525.1820656	-1.88703205	1.84E-13	3.90E-12	Solyc03g113350_3	3	64983279	64991327	+	5502	protein_coding	NA && sp|F4HVS0|BTSL2_ARATH Zinc finger protein BRUTUS-like At1g74770 OS=Arabidopsis thaliana OX=3702 GN=At1g74770 PE=2 SV=1 && PF05495:CHY zinc finger|PF14599:Zinc-ribbon|PF01814:Hemerythrin HHE cation binding domain|PF13639:Ring finger domain	Trihelix
Solyc12g096800_1	96.01790885	92.37145449	76.25529921	0	0	2.548562357	88.21488752	0.849520786	6.582406127	1.89E-13	4.00E-12	Solyc12g096800_1	12	66550145	66551524	-	1380	protein_coding	NA && sp|Q70PR7|VINSY_RAUSE Vinorine synthase OS=Rauvolfia serpentina OX=4060 GN=ACT PE=1 SV=2 && PF02458:Transferase family	CAMTA
Solyc11g066490_1	80.25377456	167.4232613	117.2282958	5.864835442	12.01367578	12.74281178	121.6351105	10.20710767	3.569488617	2.05E-13	4.32E-12	Solyc11g066490_1	11	52538200	52538826	+	627	protein_coding	NA && sp|Q9FNH6|NHL3_ARATH NDR1/HIN1-like protein 3 OS=Arabidopsis thaliana OX=3702 GN=NHL3 PE=1 SV=1 && PF03168:Late embryogenesis abundant protein	-
Solyc07g062310_3	364.0081918	510.9296077	452.9792401	137.8236329	90.85342312	167.567975	442.6390132	132.081677	1.74211492	2.18E-13	4.60E-12	Solyc07g062310_3	7	65206399	65211623	+	2253	protein_coding	NA && sp|F4KGE8|GIL1_ARATH Protein GRAVITROPIC IN THE LIGHT 1 OS=Arabidopsis thaliana OX=3702 GN=GIL1 PE=1 SV=1 && PF04859:Plant protein of unknown function (DUF641)	-
Solyc01g009170_3	568.9419375	281.4442754	372.1713857	1044.673813	991.1282522	1074.856174	407.5191995	1036.88608	-1.348451259	2.22E-13	4.68E-12	Solyc01g009170_3	1	3137326	3139805	-	1781	protein_coding	NA && sp|O24606|EIN3_ARATH Protein ETHYLENE INSENSITIVE 3 OS=Arabidopsis thaliana OX=3702 GN=EIN3 PE=1 SV=1 && PF04873:Ethylene insensitive 3	EIL
Solyc01g091690_3	214.9654676	225.1554203	207.1412605	478.7171929	524.0966061	514.8095961	215.7540495	505.874465	-1.230672128	2.29E-13	4.81E-12	Solyc01g091690_3	1	85145598	85150533	-	2783	protein_coding	NA && sp|Q9ZPH9|PMTF_ARATH Probable methyltransferase PMT15 OS=Arabidopsis thaliana OX=3702 GN=At4g00750 PE=2 SV=1 && PF03141:Putative S-adenosyl-L-methionine-dependent methyltransferase	NAC
Solyc09g005400_3	262.2578704	268.4545396	348.270471	53.51662341	42.04786524	93.02252602	292.9942937	62.86233822	2.216348032	2.32E-13	4.87E-12	Solyc09g005400_3	9	296641	297747	-	766	protein_coding	NA && sp|Q9C7I3|ML168_ARATH MLP-like protein 168 OS=Arabidopsis thaliana OX=3702 GN=MLP168 PE=2 SV=1 && PF00407:Pathogenesis-related protein Bet v I family	-
Solyc07g066385_1	362.5750886	285.7741873	450.7029625	129.0263797	106.6213726	96.20822897	366.3507462	110.6186604	1.731261253	2.41E-13	5.05E-12	Solyc07g066385_1	7	67963535	67965380	+	718	protein_coding	NA && - && -	-
Solyc09g011740_3	643.4632996	541.2389912	729.546967	299.839712	277.8162525	238.9277209	638.0830859	272.1945618	1.231796177	2.49E-13	5.22E-12	Solyc09g011740_3	9	5033831	5038755	+	2429	protein_coding	NA && sp|Q9SH93|IPCS2_ARATH Phosphatidylinositol:ceramide inositolphosphotransferase 2 OS=Arabidopsis thaliana OX=3702 GN=IPCS2 PE=1 SV=1 && PF14360:PAP2 superfamily C-terminal	-
Solyc07g063240_3	339.6454388	363.7126021	298.1923641	102.6346202	75.08547365	119.7824308	333.850135	99.16750822	1.747309469	2.63E-13	5.50E-12	Solyc07g063240_3	7	65881860	65895919	-	6668	protein_coding	NA && sp|Q94AN2|CHER1_ARATH Choline transporter protein 1 OS=Arabidopsis thaliana OX=3702 GN=CHER1 PE=1 SV=1 && PF04515:Plasma-membrane choline transporter	-
Solyc03g062940_3	200.6344364	186.186213	153.6487372	433.9978227	488.0555787	467.6611925	180.1564622	463.238198	-1.366753398	2.66E-13	5.56E-12	Solyc03g062940_3	3	34745175	34746409	+	1096	protein_coding	NA && sp|Q9XF57|PEX7_ARATH Peroxisome biogenesis protein 7 OS=Arabidopsis thaliana OX=3702 GN=PEX7 PE=1 SV=2 && -	C2H2
Solyc02g084410_3	424.1985227	541.2389912	397.2104392	8.797253163	37.54273683	11.46853061	454.2159843	19.26950686	4.563523272	2.68E-13	5.60E-12	Solyc02g084410_3	2	48080133	48081779	+	1456	protein_coding	NA && - && PF00903:Glyoxalase/Bleomycin resistance protein/Dioxygenase superfamily	NAC
novel.886	214.9654676	239.5884601	229.9040364	38.8545348	68.32778102	38.22843535	228.1526547	48.47025039	2.238713508	2.69E-13	5.61E-12	-	6	8155649	8159201	+	3553	-	- && - && -	-
Solyc06g075650_3	91.7185995	152.9902215	220.7989261	16.12829746	6.757692629	21.02563944	155.169249	14.63720985	3.399371558	2.82E-13	5.87E-12	Solyc06g075650_3	6	47156797	47158012	+	1050	protein_coding	NA && sp|O82598|TIP13_ARATH Aquaporin TIP1-3 OS=Arabidopsis thaliana OX=3702 GN=TIP1-3 PE=1 SV=1 && PF00230:Major intrinsic protein	BES1
Solyc10g009290_1	126.1130743	98.1446704	126.3334061	9.530357593	7.508547365	16.56565532	116.863717	11.20152009	3.371442951	2.82E-13	5.87E-12	Solyc10g009290_1	10	3273458	3274813	-	1356	protein_coding	NA && sp|O23090|BH014_ARATH Transcription factor bHLH14 OS=Arabidopsis thaliana OX=3702 GN=BHLH14 PE=1 SV=1 && PF14215:bHLH-MYC and R2R3-MYB transcription factors N-terminal|PF00010:Helix-loop-helix DNA-binding domain	bHLH
Solyc10g083690_3	93.15170262	25.97947158	39.83485779	317.4342183	366.4171114	251.0333921	52.98867733	311.6282406	-2.561977893	2.89E-13	6.01E-12	Solyc10g083690_3	10	63589342	63590944	+	1516	protein_coding	NA && sp|P37122|C76A2_SOLME Cytochrome P450 76A2 OS=Solanum melongena OX=4111 GN=CYP76A2 PE=2 SV=1 && PF00067:Cytochrome P450	MYB
Solyc05g056420_3	269.423386	528.2492554	223.0752037	63.78008543	47.3038484	85.37683895	340.2492817	65.48692426	2.37206845	2.97E-13	6.17E-12	Solyc05g056420_3	5	66564382	66575987	-	8095	protein_coding	NA && sp|Q9FFN7|DGK2_ARATH Diacylglycerol kinase 2 OS=Arabidopsis thaliana OX=3702 GN=DGK2 PE=1 SV=1 && PF14144:Seed dormancy control	bHLH
novel.134	104.6165276	85.15493461	54.63066212	3.665522151	3.003418946	1.274281178	81.46737476	2.647740759	4.962264842	3.06E-13	6.34E-12	-	1	88896312	88898224	-	684	-	- && sp|Q6GME1|PYRG2_XENLA CTP synthase 2 OS=Xenopus laevis OX=8355 GN=ctps2 PE=2 SV=1 && -	-
Solyc10g079420_1	290.9199328	239.5884601	224.2133424	604.8111549	600.6837892	542.843782	251.5739118	582.7795754	-1.214437504	3.18E-13	6.59E-12	Solyc10g079420_1	10	61086939	61087556	+	618	protein_coding	NA && sp|Q9SS31|CML36_ARATH Probable calcium-binding protein CML36 OS=Arabidopsis thaliana OX=3702 GN=CML36 PE=2 SV=1 && PF13499:EF-hand domain pair	HSF
Solyc08g006850_3	120.3806618	152.9902215	130.8859613	2.932417721	16.5188042	1.274281178	134.7522816	6.908501034	4.310377777	3.21E-13	6.65E-12	Solyc08g006850_3	8	1388439	1408950	+	2539	protein_coding	NA && sp|Q2MY43|PAT08_SOLTU Patatin-08 OS=Solanum tuberosum OX=4113 PE=2 SV=1 && PF01734:Patatin-like phospholipase	M-type_MADS
Solyc08g082820_3	460.0261006	541.2389912	618.0093652	230.9278955	233.5158231	212.8049568	539.7581523	225.7495585	1.259993124	3.30E-13	6.81E-12	Solyc08g082820_3	8	65610083	65614370	+	2421	protein_coding	NA && sp|P49118|BIP_SOLLC Luminal-binding protein OS=Solanum lycopersicum OX=4081 PE=2 SV=1 && PF00012:Hsp70 protein	GATA
Solyc04g007050_3	207.799952	277.1143635	186.6547622	519.771041	630.7179787	560.6837185	223.8563592	570.3909127	-1.353376266	3.31E-13	6.82E-12	Solyc04g007050_3	4	763876	769023	+	3295	protein_coding	NA && sp|Q71BH1|TM2S_SOLLC ToMV susceptible protein tm-2 OS=Solanum lycopersicum OX=4081 GN=tm-2 PE=1 SV=1 && PF18052:Rx N-terminal domain|PF00931:NB-ARC domain	C3H
Solyc08g062680_1	1110.654916	876.0855137	801.2497111	486.0482372	435.4957472	391.2043218	929.3300469	437.5827687	1.086015976	3.33E-13	6.86E-12	Solyc08g062680_1	8	51841433	51841906	-	474	protein_coding	NA && - && PF13359:DDE superfamily endonuclease	SBP
Solyc01g090120_3	263.6909736	285.7741873	324.3695563	711.8444017	578.1581471	671.546181	291.2782391	653.8495766	-1.16397391	3.58E-13	7.36E-12	Solyc01g090120_3	1	83634612	83635927	-	750	protein_coding	NA && sp|O82081|UCC1_ARATH Uclacyanin 1 OS=Arabidopsis thaliana OX=3702 GN=UCC1 PE=1 SV=1 && PF02298:Plastocyanin-like domain	MYB
Solyc07g005100_3	128.9792805	239.5884601	79.66971559	1545.384139	1393.586391	1553.348756	149.4124854	1497.439762	-3.328134894	3.71E-13	7.63E-12	Solyc07g005100_3	7	123931	126332	+	1350	protein_coding	NA && sp|O81862|CHIC_ARATH Class V chitinase OS=Arabidopsis thaliana OX=3702 GN=ChiC PE=1 SV=1 && PF00704:Glycosyl hydrolases family 18	ARR-B
Solyc02g091730_2	361.1419855	386.8054657	529.2345393	152.4857215	114.8807747	70.7226054	425.7273302	112.6963672	1.922160424	3.79E-13	7.78E-12	Solyc02g091730_2	2	53610622	53614765	+	1567	protein_coding	NA && - && -	NAC
Solyc06g005250_3	189.1696115	291.5474032	208.2793993	63.046981	42.04786524	39.50271653	229.6654713	48.19918759	2.253546062	3.80E-13	7.78E-12	Solyc06g005250_3	6	266633	272069	+	1780	protein_coding	NA && - && -	-
Solyc05g006340_3	0	5.773215906	6.828832765	136.357424	188.4645389	62.43977774	4.20068289	129.0872469	-4.896913844	3.81E-13	7.81E-12	Solyc05g006340_3	5	990165	992536	-	1737	protein_coding	NA && sp|O48716|JGB_ARATH Protein JINGUBANG OS=Arabidopsis thaliana OX=3702 GN=JGB PE=1 SV=1 && -	Dof
Solyc01g096510_2	40.12688728	51.95894315	86.49854835	336.4949335	286.8265093	227.4591903	59.52812626	283.5935444	-2.237617	3.89E-13	7.96E-12	Solyc01g096510_2	1	87471531	87472284	-	754	protein_coding	NA && - && PF05678:VQ motif	-
Solyc07g053170_3	547.4453908	246.80498	366.4806917	60.84766771	110.3756463	93.02252602	386.9103541	88.08194667	2.134749189	3.94E-13	8.04E-12	Solyc07g053170_3	7	61751913	61752933	-	981	protein_coding	NA && sp|Q39008|M3K1_ARATH Mitogen-activated protein kinase kinase kinase 1 OS=Arabidopsis thaliana OX=3702 GN=MEKK1 PE=1 SV=2 && -	-
Solyc05g005840_3	247.9268393	362.2692981	291.3635313	89.43874049	84.09573049	94.2968072	300.5198895	89.27709273	1.749858158	4.06E-13	8.28E-12	Solyc05g005840_3	5	657707	661099	+	1323	protein_coding	NA && sp|Q94JU2|WTR18_ARATH WAT1-related protein At3g28050 OS=Arabidopsis thaliana OX=3702 GN=At3g28050 PE=2 SV=1 && -	GRAS
Solyc09g065240_3	174.8385803	288.6607953	264.0482002	33.72280379	60.06837892	19.11421768	242.5158586	37.63513346	2.695485517	4.18E-13	8.52E-12	Solyc09g065240_3	9	63530911	63532874	-	1666	protein_coding	NA && sp|Q93ZQ3|PLP9_ARATH Probable inactive patatin-like protein 9 OS=Arabidopsis thaliana OX=3702 GN=PLP9 PE=2 SV=1 && PF01734:Patatin-like phospholipase	bHLH
Solyc12g096030_1	7.165515586	5.773215906	0	84.30700948	131.3995789	124.8795555	4.312910497	113.5287146	-4.798198472	4.24E-13	8.64E-12	Solyc12g096030_1	12	66089307	66090341	+	1035	protein_coding	NA && sp|Q5RD67|S2544_PONAB Solute carrier family 25 member 44 OS=Pongo abelii OX=9601 GN=SLC25A44 PE=2 SV=2 && PF00153:Mitochondrial carrier protein	MYB
Solyc08g077230_3	14.33103117	20.20625567	29.59160865	233.1272088	115.6316294	179.6736462	21.3762985	176.1441615	-3.026107589	4.30E-13	8.75E-12	Solyc08g077230_3	8	61261820	61267676	-	2261	protein_coding	NA && sp|Q6LA43|APRR2_ARATH Two-component response regulator-like APRR2 OS=Arabidopsis thaliana OX=3702 GN=APRR2 PE=2 SV=2 && PF00249:Myb-like DNA-binding domain|PF00072:Response regulator receiver domain	ARR-B
Solyc07g066100_3	236.4620143	217.9389004	336.8890831	67.44560758	73.58376418	48.42268478	263.7633326	63.15068551	2.068274056	4.32E-13	8.78E-12	Solyc07g066100_3	7	67752686	67755189	+	801	protein_coding	NA && sp|Q9FKT1|LLG1_ARATH GPI-anchored protein LLG1 OS=Arabidopsis thaliana OX=3702 GN=LLG1 PE=1 SV=1 && -	-
Solyc04g071610_3	994.5735633	964.1270562	841.0845689	513.9062056	485.0521598	390.5671812	933.2617295	463.1751822	1.010807604	4.35E-13	8.83E-12	Solyc04g071610_3	4	58664498	58665932	+	747	protein_coding	NA && sp|Q08655|ASR1_SOLLC Abscisic stress-ripening protein 1 OS=Solanum lycopersicum OX=4081 GN=ASR1 PE=2 SV=1 && PF02496:ABA/WDS induced protein	-
Solyc06g068270_3	60.19033092	89.48484654	52.35438453	304.971443	252.2871915	256.7676574	67.34318733	271.3420973	-2.018208753	4.36E-13	8.85E-12	Solyc06g068270_3	6	42422477	42424562	-	1313	protein_coding	NA && sp|D4N502|DIOX3_PAPSO Codeine O-demethylase OS=Papaver somniferum OX=3469 GN=CODM PE=1 SV=1 && PF03171:2OG-Fe(II) oxygenase superfamily|PF14226:non-haem dioxygenase in morphine synthesis N-terminal	STAT
Solyc11g030380_2	83.1199808	80.82502268	81.94599318	0	0	0	81.96366555	0	9.303466826	5.08E-13	1.03E-11	Solyc11g030380_2	11	21733123	21738207	-	1437	protein_coding	NA && - && -	-
Solyc11g011020_2	237.8951174	282.8875794	334.6128055	60.11456328	59.31752418	95.57108838	285.1318341	71.66772528	1.989776373	5.10E-13	1.03E-11	Solyc11g011020_2	11	4060572	4064034	+	2504	protein_coding	NA && sp|Q9LP77|Y1848_ARATH Probable inactive receptor kinase At1g48480 OS=Arabidopsis thaliana OX=3702 GN=RKL1 PE=1 SV=1 && PF00069:Protein kinase domain|PF13855:Leucine rich repeat	ERF
Solyc05g006520_3	319.5819951	256.9081078	333.4746667	610.6759904	731.3325134	681.7404304	303.3215899	674.5829781	-1.150648474	5.23E-13	1.06E-11	Solyc05g006520_3	5	1134270	1140944	-	1537	protein_coding	NA && sp|P52903|ODPA_SOLTU Pyruvate dehydrogenase E1 component subunit alpha, mitochondrial OS=Solanum tuberosum OX=4113 PE=1 SV=1 && PF00676:Dehydrogenase E1 component	E2F/DP
Solyc10g080370_1	389.8040479	394.0219856	422.2494926	164.2153924	157.6794947	159.2851473	402.0251754	160.3933448	1.326479708	5.31E-13	1.07E-11	Solyc10g080370_1	10	61782911	61783108	-	198	protein_coding	NA && - && -	-
Solyc07g065340_1	47.29240287	67.83528689	130.8859613	390.7446613	349.1474525	351.0644646	82.00455036	363.6521928	-2.133853509	5.48E-13	1.10E-11	Solyc07g065340_1	7	67274181	67275176	-	996	protein_coding	NA && sp|Q39218|SAT3_ARATH Serine acetyltransferase 3, mitochondrial OS=Arabidopsis thaliana OX=3702 GN=SAT3 PE=1 SV=3 && PF00132:Bacterial transferase hexapeptide (six repeats)|PF06426:Serine acetyltransferase, N-terminal	HRT-like
Solyc08g066320_3	120.3806618	111.1344062	132.0241001	8.797253163	12.01367578	19.11421768	121.1797227	13.30838221	3.177794633	5.81E-13	1.17E-11	Solyc08g066320_3	8	54906722	54910159	+	3345	protein_coding	NA && sp|Q9SGP2|HSL1_ARATH Receptor-like protein kinase HSL1 OS=Arabidopsis thaliana OX=3702 GN=HSL1 PE=2 SV=1 && PF13855:Leucine rich repeat|PF00069:Protein kinase domain	STAT
Solyc09g008060_3	154.7751367	80.82502268	42.11113538	0	0	0	92.57043157	0	9.475743591	5.84E-13	1.17E-11	Solyc09g008060_3	9	1520686	1524616	+	1562	protein_coding	NA && sp|Q9SJL0|U86A1_ARATH UDP-glycosyltransferase 86A1 OS=Arabidopsis thaliana OX=3702 GN=UGT86A1 PE=2 SV=1 && PF00201:UDP-glucoronosyl and UDP-glucosyl transferase	GRAS
Solyc01g099760_3	859.8618703	591.7546303	1015.219804	1804.170003	1705.941961	1569.914412	822.2787683	1693.342125	-1.039332424	6.58E-13	1.32E-11	Solyc01g099760_3	1	89784870	89790228	+	2031	protein_coding	NA && sp|P54776|PRS6A_SOLLC 26S proteasome regulatory subunit 6A homolog OS=Solanum lycopersicum OX=4081 GN=TBP1 PE=2 SV=1 && PF17862:AAA+ lid domain|PF16450:Proteasomal ATPase OB C-terminal domain|PF00004:ATPase family associated with various cellular activities (AAA)	NAC
Solyc06g054150_1	91.7185995	69.27859087	177.5496519	10.26346202	3.003418946	7.64568707	112.8489474	6.970856013	4.016103523	6.63E-13	1.33E-11	Solyc06g054150_1	6	37060858	37061475	+	618	protein_coding	NA && - && -	LBD
Solyc01g080020_2	77.38756833	121.237534	75.11716041	352.6232309	418.976943	263.7762039	91.24742092	345.1254593	-1.923591159	7.42E-13	1.48E-11	Solyc01g080020_2	1	79001308	79002938	-	1631	protein_coding	NA && sp|P0DO21|GIP2_NICBE Probable aspartic proteinase GIP2 OS=Nicotiana benthamiana OX=4100 GN=GIP2 PE=1 SV=1 && PF14543:Xylanase inhibitor N-terminal|PF14541:Xylanase inhibitor C-terminal	FAR1
Solyc03g097990_3	332.4799232	304.537139	377.8620797	101.1684114	94.6076968	131.888102	338.2930473	109.2214034	1.629868824	7.64E-13	1.52E-11	Solyc03g097990_3	3	61784781	61789555	-	1466	protein_coding	NA && sp|Q6PC19|SSU72_DANRE RNA polymerase II subunit A C-terminal domain phosphatase SSU72 OS=Danio rerio OX=7955 GN=ssu72 PE=2 SV=1 && PF04722:Ssu72-like protein	-
Solyc05g054830_3	341.0785419	256.9081078	285.6728373	741.9016834	584.9158397	682.377571	294.5531623	669.731698	-1.185807758	7.95E-13	1.58E-11	Solyc05g054830_3	5	65490807	65495590	+	2435	protein_coding	NA && sp|Q9C7A2|ITN1_ARATH Ankyrin repeat-containing protein ITN1 OS=Arabidopsis thaliana OX=3702 GN=ITN1 PE=1 SV=1 && PF12796:Ankyrin repeats (3 copies)|PF13962:Domain of unknown function	GRAS
Solyc05g005170_3	8.598618703	0	11.38138794	114.3642911	117.1333389	125.5166961	6.660002215	119.0047754	-4.112333439	8.30E-13	1.65E-11	Solyc05g005170_3	5	159158	162275	+	1596	protein_coding	NA && sp|Q949Z1|PGLR4_ARATH Polygalacturonase At1g48100 OS=Arabidopsis thaliana OX=3702 GN=At1g48100 PE=2 SV=1 && PF00295:Glycosyl hydrolases family 28	C3H
Solyc06g053750_3	153.3420335	79.3817187	79.66971559	391.4777657	367.1679662	362.5329952	104.1311559	373.7262424	-1.849414886	8.34E-13	1.66E-11	Solyc06g053750_3	6	36690656	36713378	+	6008	protein_coding	NA && sp|Q8RY18|TRF1A_ARATH TNF receptor-associated factor homolog 1a OS=Arabidopsis thaliana OX=3702 GN=TRAF1A PE=1 SV=1 && PF00917:MATH domain	ZF-HD
Solyc01g081450_3	769.5763739	704.3323405	754.5860205	204.536136	346.1440335	339.595934	742.8315783	296.7587012	1.323169905	8.95E-13	1.78E-11	Solyc01g081450_3	1	80513103	80516503	-	1039	protein_coding	NA && - && -	-
Solyc08g065150_1	237.8951174	310.3103549	340.3034994	93.83736707	93.85684206	80.27971424	296.1696573	89.32464112	1.732339034	9.99E-13	1.98E-11	Solyc08g065150_1	8	52967644	52968675	-	1032	protein_coding	NA && sp|F4K956|A70_ARATH Pathogen-associated molecular patterns-induced protein A70 OS=Arabidopsis thaliana OX=3702 GN=A70 PE=1 SV=1 && PF05553:Cotton fibre expressed protein|PF14364:Domain of unknown function (DUF4408)	-
Solyc02g081590_3	310.9833764	236.7018521	342.579777	650.996734	640.4790902	745.4544894	296.7550019	678.9767712	-1.19092749	1.06E-12	2.10E-11	Solyc02g081590_3	2	46038293	46041280	+	2905	protein_coding	NA && - && PF14826:FACT complex subunit SPT16 N-terminal lobe domain	-
Solyc03g081330_1	611.935031	534.0224713	466.6369056	199.404405	251.5363367	167.567975	537.5314693	206.1695722	1.383061602	1.06E-12	2.10E-11	Solyc03g081330_1	3	53624700	53624978	-	279	protein_coding	NA && - && -	-
Solyc02g090870_1	206.3668489	163.0933493	266.3244778	48.38489239	48.80555787	46.51126301	211.9282253	47.90057109	2.148810531	1.07E-12	2.11E-11	Solyc02g090870_1	2	52995223	52996431	+	1209	protein_coding	NA && - && -	-
Solyc01g109710_3	1176.577659	799.5904029	854.7422344	425.933674	331.1269388	471.484036	943.6367655	409.5148829	1.202641718	1.13E-12	2.23E-11	Solyc01g109710_3	1	96514932	96517857	-	1132	protein_coding	NA && - && PF00582:Universal stress protein family	-
Solyc11g007130_2	87.41929015	34.63929543	58.0450785	255.1203417	261.2974483	298.1817957	60.03455469	271.5331953	-2.178179531	1.18E-12	2.31E-11	Solyc11g007130_2	11	1581973	1588571	+	3214	protein_coding	NA && - && PF07690:Major Facilitator Superfamily	-
Solyc02g091660_3	67.35584651	57.73215906	117.2282958	3.665522151	1.501709473	3.822843535	80.77210045	2.99669172	4.743064047	1.19E-12	2.34E-11	Solyc02g091660_3	2	53539149	53543594	-	4278	protein_coding	NA && sp|Q7Y214|GTE7_ARATH Transcription factor GTE7 OS=Arabidopsis thaliana OX=3702 GN=GTE7 PE=2 SV=1 && PF17035:Bromodomain extra-terminal - transcription regulation|PF00439:Bromodomain	HB-other
Solyc01g088160_3	137.5778992	170.3098692	139.9910717	20.52692405	4.505128419	1.274281178	149.2929467	8.768777881	4.104429266	1.21E-12	2.38E-11	Solyc01g088160_3	1	82885341	82888151	-	2476	protein_coding	NA && sp|O22213|CKX1_ARATH Cytokinin dehydrogenase 1 OS=Arabidopsis thaliana OX=3702 GN=CKX1 PE=1 SV=1 && PF01565:FAD binding domain	bHLH
Solyc02g064830_3	73.08825898	86.59823858	70.56460524	0	0	0	76.7503676	0	9.207940733	1.27E-12	2.49E-11	Solyc02g064830_3	2	36524739	36526903	-	1901	protein_coding	NA && sp|O82333|GH31_ARATH Probable indole-3-acetic acid-amido synthetase GH3.1 OS=Arabidopsis thaliana OX=3702 GN=GH3.1 PE=2 SV=1 && PF03321:GH3 auxin-responsive promoter	ERF
Solyc11g018775_1	163.3737554	200.6192527	159.3394312	18.32761076	42.04786524	25.48562357	174.4441464	28.62036652	2.609790123	1.36E-12	2.67E-11	Solyc11g018775_1	11	9474796	9476258	+	1190	protein_coding	NA && sp|Q02200|PERX_NICSY Lignin-forming anionic peroxidase OS=Nicotiana sylvestris OX=4096 PE=2 SV=1 && PF00141:Peroxidase	NAC
Solyc03g119340_3	484.3888536	480.6202241	573.6219522	236.0596265	152.4235115	200.6992856	512.87701	196.3941412	1.385573608	1.38E-12	2.69E-11	Solyc03g119340_3	3	69466727	69471740	+	3561	protein_coding	NA && sp|Q8GYA4|CRK10_ARATH Cysteine-rich receptor-like protein kinase 10 OS=Arabidopsis thaliana OX=3702 GN=CRK10 PE=1 SV=3 && PF07714:Protein tyrosine kinase	MYB_related
Solyc09g065420_3	141.8772086	184.742909	132.0241001	10.26346202	25.52906104	3.822843535	152.8814059	13.2051222	3.5479418	1.39E-12	2.71E-11	Solyc09g065420_3	9	63761597	63762761	-	767	protein_coding	NA && sp|Q9LJ86|LTPG5_ARATH Non-specific lipid transfer protein GPI-anchored 5 OS=Arabidopsis thaliana OX=3702 GN=LTPG5 PE=2 SV=1 && PF14368:Probable lipid transfer	-
novel.671	326.7475107	246.80498	254.9430899	62.31387657	93.85684206	72.63402717	276.1651935	76.2682486	1.856628987	1.39E-12	2.71E-11	-	4	6109282	6111569	+	2288	-	- && - && -	-
Solyc03g093930_3	666.3929495	471.9604003	386.96719	153.2188259	205.7341978	135.7109455	508.4401799	164.8879897	1.624416436	1.42E-12	2.78E-11	Solyc03g093930_3	3	57040043	57041233	-	838	protein_coding	NA && sp|Q9SJX8|MYB14_ARATH Transcription factor MYB14 OS=Arabidopsis thaliana OX=3702 GN=MYB14 PE=2 SV=1 && PF00249:Myb-like DNA-binding domain	MYB
Solyc06g071530_3	760.9777552	736.085028	677.1925825	359.9542752	394.9495914	316.0217322	724.7517886	356.9751996	1.021946243	1.53E-12	2.98E-11	Solyc06g071530_3	6	44182333	44186210	+	2328	protein_coding	NA && sp|Q96499|RL44_GOSHI 60S ribosomal protein L44 OS=Gossypium hirsutum OX=3635 GN=RPL44 PE=3 SV=3 && PF00935:Ribosomal protein L44	-
Solyc11g073080_2	303.8178608	232.3719402	196.8980114	72.57733859	39.0444463	50.33410655	244.3626041	53.98529715	2.17685222	1.55E-12	3.03E-11	Solyc11g073080_2	11	56480171	56484522	+	1411	protein_coding	NA && sp|Q9FJF4|MBD7_ARATH Methyl-CpG-binding domain-containing protein 7 OS=Arabidopsis thaliana OX=3702 GN=MBD7 PE=1 SV=1 && PF01429:Methyl-CpG binding domain	-
Solyc03g118190_3	60.19033092	73.6085028	66.01205006	293.9748765	271.0585599	206.4335509	66.60362793	257.1556624	-1.948582109	1.57E-12	3.06E-11	Solyc03g118190_3	3	68617787	68618649	-	738	protein_coding	NA && sp|Q9FH54|EF114_ARATH Ethylene-responsive transcription factor ERF114 OS=Arabidopsis thaliana OX=3702 GN=ERF114 PE=1 SV=1 && PF00847:AP2 domain	ERF
Solyc07g056260_3	514.4840191	448.8675367	385.8290512	154.6850348	199.7273599	154.1880226	449.726869	169.5334724	1.407017882	1.58E-12	3.07E-11	Solyc07g056260_3	7	64220617	64247077	-	7006	protein_coding	NA && sp|Q9SHJ3|CALS7_ARATH Callose synthase 7 OS=Arabidopsis thaliana OX=3702 GN=CALS7 PE=3 SV=3 && PF02364:1,3-beta-glucan synthase component|PF04652:Vta1 like|PF14288:1,3-beta-glucan synthase subunit FKS1, domain-1	M-type_MADS
Solyc10g076790_2	213.5323645	233.8152442	283.3965597	72.57733859	60.06837892	68.81118363	243.5813895	67.15230038	1.860352982	1.62E-12	3.15E-11	Solyc10g076790_2	10	59843582	59848957	-	2213	protein_coding	NA && sp|Q9FEL7|LAX2_MEDTR Auxin transporter-like protein 2 OS=Medicago truncatula OX=3880 GN=LAX2 PE=2 SV=1 && PF01490:Transmembrane amino acid transporter protein	-
Solyc04g076970_3	85.98618703	121.237534	245.8379795	19.06071519	15.01709473	15.92851473	151.0205669	16.66877488	3.184582583	1.63E-12	3.16E-11	Solyc04g076970_3	4	62009804	62011252	+	1226	protein_coding	NA && - && PF14144:Seed dormancy control	bHLH
Solyc05g005290_3	246.4937362	272.7844515	227.6277588	57.18214556	75.08547365	76.4568707	248.9686488	69.57482997	1.837112504	1.65E-12	3.19E-11	Solyc05g005290_3	5	231573	234474	-	2242	protein_coding	NA && sp|Q9ZUD9|SRO2_ARATH Probable inactive poly [ADP-ribose] polymerase SRO2 OS=Arabidopsis thaliana OX=3702 GN=SRO2 PE=1 SV=1 && PF00644:Poly(ADP-ribose) polymerase catalytic domain	-
Solyc03g119640_3	42.99309351	83.71163063	63.73577247	299.839712	265.051722	225.5477686	63.48016554	263.4797342	-2.053029266	2.04E-12	3.94E-11	Solyc03g119640_3	3	69680470	69684905	+	2561	protein_coding	NA && sp|Q9LS46|ALMT9_ARATH Aluminum-activated malate transporter 9 OS=Arabidopsis thaliana OX=3702 GN=ALMT9 PE=2 SV=1 && PF11744:Aluminium activated malate transporter	-
Solyc12g010500_2	63.05653716	62.06207099	101.2943527	0	0	0	75.47098694	0	9.187130915	2.10E-12	4.05E-11	Solyc12g010500_2	12	3509182	3511367	+	1003	protein_coding	NA && sp|Q9ZQF9|MBR1_ARATH E3 ubiquitin-protein ligase MBR1 OS=Arabidopsis thaliana OX=3702 GN=MBR1 PE=1 SV=1 && PF13639:Ring finger domain	G2-like
Solyc03g112770_3	272.2895923	238.1451561	325.5076951	640.0001676	620.9568671	594.4521697	278.6474812	618.4697348	-1.145844663	2.18E-12	4.20E-11	Solyc03g112770_3	3	64596673	64600006	+	871	protein_coding	NA && sp|Q8L8T2|GRXC1_ARATH Glutaredoxin-C1 OS=Arabidopsis thaliana OX=3702 GN=GRXC1 PE=2 SV=2 && PF00462:Glutaredoxin	MIKC_MADS
Solyc12g014140_2	117.5144556	95.25806244	34.14416382	0	0	0	82.30556062	0	9.305721002	2.19E-12	4.22E-11	Solyc12g014140_2	12	4949918	4952062	-	1741	protein_coding	NA && sp|Q9MAH8|TCP3_ARATH Transcription factor TCP3 OS=Arabidopsis thaliana OX=3702 GN=TCP3 PE=1 SV=1 && PF03634:TCP family transcription factor	TCP
Solyc03g046380_1	187.7365083	317.5268748	218.5226485	24.92555063	47.3038484	61.80263715	241.2620105	44.67734539	2.427975979	2.21E-12	4.25E-11	Solyc03g046380_1	3	12427687	12427929	+	243	protein_coding	NA && - && -	-
Solyc03g098700_1	137.5778992	99.58797437	88.77482594	1.46620886	0	0	108.6468999	0.488736287	7.848764555	2.23E-12	4.29E-11	Solyc03g098700_1	3	62415236	62415895	-	660	protein_coding	NA && sp|O24384|CPI8_SOLTU Cysteine protease inhibitor 8 (Fragment) OS=Solanum tuberosum OX=4113 PE=2 SV=1 && PF00197:Trypsin and protease inhibitor	-
Solyc07g061720_3	0	5.773215906	2.276277588	137.0905285	93.10598733	82.82827659	2.683164498	104.3415975	-5.296708482	2.24E-12	4.30E-11	Solyc07g061720_3	7	64811545	64813346	-	1622	protein_coding	NA && sp|Q9SQ80|G2OX1_PEA Gibberellin 2-beta-dioxygenase 1 OS=Pisum sativum OX=3888 GN=GA2OX1 PE=1 SV=1 && PF14226:non-haem dioxygenase in morphine synthesis N-terminal|PF03171:2OG-Fe(II) oxygenase superfamily	STAT
Solyc03g083710_1	80.25377456	89.48484654	54.63066212	0	0	0	74.78976107	0	9.169111613	2.25E-12	4.31E-11	Solyc03g083710_1	3	55080570	55081157	-	588	protein_coding	NA && sp|Q9STY5|PMI11_ARATH Pectinesterase inhibitor 11 OS=Arabidopsis thaliana OX=3702 GN=PMEI11 PE=2 SV=1 && PF04043:Plant invertase/pectin methylesterase inhibitor	-
Solyc12g040860_2	83.1199808	46.18572725	40.97299659	313.0355917	280.8196715	201.9735668	56.75956821	265.2762766	-2.232266799	2.26E-12	4.32E-11	Solyc12g040860_2	12	56344873	56346927	-	1588	protein_coding	NA && sp|Q8VYE5|E1312_ARATH Glucan endo-1,3-beta-glucosidase 12 OS=Arabidopsis thaliana OX=3702 GN=At4g29360 PE=2 SV=1 && PF00332:Glycosyl hydrolases family 17|PF07983:X8 domain	ERF
Solyc02g089630_3	308.1171702	160.2067414	267.4626166	27.12486392	61.57008839	17.8399365	245.2621761	35.5116296	2.795359966	2.27E-12	4.33E-11	Solyc02g089630_3	2	52017396	52019762	-	1617	protein_coding	NA && sp|Q6NKX1|PROD2_ARATH Proline dehydrogenase 2, mitochondrial OS=Arabidopsis thaliana OX=3702 GN=POX2 PE=2 SV=1 && PF01619:Proline dehydrogenase	-
Solyc05g006860_3	116.0813525	41.85581532	80.80785438	1.46620886	0	2.548562357	79.58167406	1.338257072	5.845350686	2.34E-12	4.47E-11	Solyc05g006860_3	5	1477172	1484503	-	1948	protein_coding	NA && sp|Q38879|TRXH2_ARATH Thioredoxin H2 OS=Arabidopsis thaliana OX=3702 GN=TRX2 PE=1 SV=2 && PF00085:Thioredoxin	bHLH
Solyc07g017570_2	561.7764219	448.8675367	606.6279773	211.1340759	177.2017178	251.6705327	539.0906453	213.3354422	1.337028263	2.34E-12	4.47E-11	Solyc07g017570_2	7	7536315	7537532	-	606	protein_coding	NA && - && -	-
Solyc05g018870_2	121.813765	114.0210141	68.28832765	7.331044302	6.006837892	0	101.3743689	4.445960731	4.539982423	2.36E-12	4.50E-11	Solyc05g018870_2	5	24438275	24440788	-	1979	protein_coding	NA && sp|Q9LIC2|TMN7_ARATH Transmembrane 9 superfamily member 7 OS=Arabidopsis thaliana OX=3702 GN=TMN7 PE=2 SV=1 && PF02990:Endomembrane protein 70	-
Solyc08g007805_1	308.1171702	407.0117213	332.3365279	0	2.25256421	7.64568707	349.1551398	3.299417093	6.700498331	2.45E-12	4.66E-11	Solyc08g007805_1	8	2325216	2326730	+	262	protein_coding	NA && sp|Q9SQT4|NDA8A_ARATH NADH dehydrogenase [ubiquinone] 1 alpha subcomplex subunit 8-A OS=Arabidopsis thaliana OX=3702 GN=At3g06310 PE=3 SV=1 && -	AP2
Solyc11g007660_1	687.8894962	762.0644995	695.4028032	338.6942468	382.9359156	267.5990475	715.118933	329.7430699	1.11817417	2.54E-12	4.83E-11	Solyc11g007660_1	11	1882703	1884514	+	1812	protein_coding	NA && sp|P0DO24|PSI3_ARATH Protein PSK SIMULATOR 3 OS=Arabidopsis thaliana OX=3702 GN=PSI3 PE=1 SV=1 && PF05003:Protein of unknown function (DUF668)|PF11961:Domain of unknown function (DUF3475)	-
Solyc07g063475_1	745.2136209	564.3318548	587.2796178	310.103174	235.0175325	277.1561563	632.2750312	274.0922876	1.204876927	2.63E-12	5.00E-11	Solyc07g063475_1	7	66091744	66094731	+	2495	protein_coding	NA && sp|Q9LK35|THE1_ARATH Receptor-like protein kinase THESEUS 1 OS=Arabidopsis thaliana OX=3702 GN=THE1 PE=1 SV=1 && PF12819:Malectin-like domain|PF07714:Protein tyrosine kinase	GRAS
Solyc07g054720_2	117.5144556	124.124142	93.32738112	330.630098	352.9017262	309.6503263	111.6553262	331.0607168	-1.572999242	2.64E-12	5.02E-11	Solyc07g054720_2	7	63071958	63073466	+	1099	protein_coding	NA && - && -	-
Solyc03g114140_3	100.3172182	127.0107499	161.6157088	327.6976803	498.567545	412.2299612	129.6478923	412.8317289	-1.664773964	2.73E-12	5.18E-11	Solyc03g114140_3	3	65636053	65642409	-	4432	protein_coding	NA && sp|O82504|RDR2_ARATH RNA-dependent RNA polymerase 2 OS=Arabidopsis thaliana OX=3702 GN=RDR2 PE=1 SV=1 && PF05183:RNA dependent RNA polymerase	ARR-B
Solyc03g025795_1	412.7336977	353.6094742	376.7239409	143.6884683	161.4337684	140.8080702	381.0223709	148.6434356	1.358660772	3.02E-12	5.72E-11	Solyc03g025795_1	3	3226238	3227095	+	348	protein_coding	NA && sp|O03982|HIP39_ARATH Heavy metal-associated isoprenylated plant protein 39 OS=Arabidopsis thaliana OX=3702 GN=HIPP39 PE=2 SV=1 && -	-
Solyc06g076750_3	160.5075491	176.0830851	143.4054881	423.0012562	365.6662567	485.501129	159.9987074	424.7228806	-1.41211179	3.09E-12	5.84E-11	Solyc06g076750_3	6	47800433	47804042	-	2192	protein_coding	NA && sp|Q9M390|PTR1_ARATH Protein NRT1/ PTR FAMILY 8.1 OS=Arabidopsis thaliana OX=3702 GN=NPF8.1 PE=1 SV=1 && PF00854:POT family	G2-like
Solyc01g087540_3	548.8784939	552.785423	614.5949488	290.3093544	263.5500125	259.9533604	572.0862886	271.2709091	1.077965396	3.09E-12	5.84E-11	Solyc01g087540_3	1	82357181	82359651	+	1567	protein_coding	NA && - && PF04862:Protein of unknown function (DUF642)	B3
Solyc06g053930_3	243.6275299	261.2380197	229.9040364	42.52005695	79.59060207	61.16549656	244.9231954	61.09205186	2.003264332	3.12E-12	5.89E-11	Solyc06g053930_3	6	36929346	36931185	+	574	protein_coding	NA && sp|A2WN93|CALM1_ORYSI Calmodulin-1 OS=Oryza sativa subsp. indica OX=39946 GN=CAM1-1 PE=1 SV=2 && PF13499:EF-hand domain pair	-
Solyc06g051400_3	464.32541	355.0527782	439.3215745	158.3505569	114.1299199	172.0279591	419.5665876	148.1694787	1.500339757	3.21E-12	6.05E-11	Solyc06g051400_3	6	34845188	34847723	+	1948	protein_coding	NA && sp|P48620|FAD3C_SESIN Omega-3 fatty acid desaturase, chloroplastic OS=Sesamum indicum OX=4182 GN=FAD7 PE=2 SV=1 && PF00487:Fatty acid desaturase|PF11960:Domain of unknown function (DUF3474)	HSF
Solyc03g005430_3	286.6206234	241.0317641	154.786876	598.2132151	555.632505	661.9890722	227.4797545	605.2782641	-1.418507786	3.29E-12	6.19E-11	Solyc03g005430_3	3	289494	317879	-	6069	protein_coding	NA && sp|Q8RY18|TRF1A_ARATH TNF receptor-associated factor homolog 1a OS=Arabidopsis thaliana OX=3702 GN=TRAF1A PE=1 SV=1 && PF00917:MATH domain	ZF-HD
Solyc03g007380_2	151.9089304	77.93841473	171.8589579	5.864835442	15.01709473	17.8399365	133.902101	12.90728889	3.370398021	3.34E-12	6.29E-11	Solyc03g007380_2	3	1929429	1930790	+	1198	protein_coding	NA && sp|Q8H0Y8|WRK41_ARATH Probable WRKY transcription factor 41 OS=Arabidopsis thaliana OX=3702 GN=WRKY41 PE=1 SV=2 && PF03106:WRKY DNA -binding domain	WRKY
Solyc03g031830_2	140.4441055	111.1344062	190.0691786	481.6496107	383.6867704	433.8927412	147.2158968	433.0763741	-1.549380396	3.44E-12	6.46E-11	Solyc03g031830_2	3	4332626	4339330	+	1464	protein_coding	NA && sp|Q9M9P0|EXP13_ARATH Expansin-A13 OS=Arabidopsis thaliana OX=3702 GN=EXPA13 PE=2 SV=2 && PF13920:Zinc finger, C3HC4 type (RING finger)|PF03330:Lytic transglycolase|PF01357:Pollen allergen	MYB_related
Solyc12g099440_2	547.4453908	825.5698745	540.6159272	1326.185914	1251.674846	1252.618398	637.8770642	1276.826386	-1.003490873	3.53E-12	6.62E-11	Solyc12g099440_2	12	67571780	67579650	+	2454	protein_coding	NA && sp|O49809|MFPA_BRANA Glyoxysomal fatty acid beta-oxidation multifunctional protein MFP-a OS=Brassica napus OX=3708 PE=2 SV=2 && PF02737:3-hydroxyacyl-CoA dehydrogenase, NAD binding domain|PF00378:Enoyl-CoA hydratase/isomerase|PF00725:3-hydroxyacyl-CoA dehydrogenase, C-terminal domain	MYB_related
Solyc01g112050_3	465.7585131	435.8778009	433.6308806	192.8064651	87.09914944	121.6938525	445.0890648	133.866489	1.733322918	3.58E-12	6.71E-11	Solyc01g112050_3	1	98076814	98086302	-	5829	protein_coding	NA && sp|A0A178VBJ0|APSR1_ARATH Protein ALTERED PHOSPHATE STARVATION RESPONSE 1 OS=Arabidopsis thaliana OX=3702 GN=APSR1 PE=2 SV=1 && PF04783:Protein of unknown function (DUF630)|PF04782:Protein of unknown function (DUF632)	-
Solyc05g009620_3	127.5461774	174.6397811	130.8859613	2.932417721	22.5256421	13.37995237	144.3573066	12.94600406	3.480176438	3.66E-12	6.86E-11	Solyc05g009620_3	5	3818983	3821883	+	2000	nontranslating_CDS	NA && sp|P0CW98|PCR9_ARATH Protein PLANT CADMIUM RESISTANCE 9 OS=Arabidopsis thaliana OX=3702 GN=PCR9 PE=3 SV=1 && PF04749:PLAC8 family	B3
Solyc11g063510_1	220.69788	196.2893408	190.0691786	34.45590822	21.77478736	55.43123126	202.3521332	37.22064228	2.434771072	3.79E-12	7.11E-11	Solyc11g063510_1	11	49915614	49915911	+	231	protein_coding	NA && - && -	-
Solyc02g071800_3	329.6137169	262.6813237	239.0091468	82.10769618	91.60427785	59.89121538	277.1013958	77.86772981	1.832868422	4.07E-12	7.61E-11	Solyc02g071800_3	2	41717709	41726243	+	4435	protein_coding	NA && sp|C0LGG9|Y5344_ARATH Probable LRR receptor-like serine/threonine-protein kinase At1g53440 OS=Arabidopsis thaliana OX=3702 GN=At1g53440 PE=2 SV=2 && PF11721:Malectin domain|PF00069:Protein kinase domain	ERF
Solyc06g007180_3	543.1460814	324.7433947	394.9341616	900.9853447	938.5684206	905.3767772	420.9412126	914.9768475	-1.120993943	4.33E-12	8.09E-11	Solyc06g007180_3	6	1236335	1241119	-	2413	protein_coding	NA && sp|O24661|ASNS_TRIVS Asparagine synthetase [glutamine-hydrolyzing] OS=Triphysaria versicolor OX=64093 GN=AS PE=2 SV=3 && PF13537:Glutamine amidotransferase domain|PF00733:Asparagine synthase	G2-like
Solyc12g097080_2	75.95446521	59.17546303	103.5706303	315.9680094	319.8641178	245.2991268	79.56685284	293.710418	-1.874230607	4.75E-12	8.86E-11	Solyc12g097080_2	12	66705916	66707140	-	756	protein_coding	NA && sp|Q03664|GSTX3_TOBAC Probable glutathione S-transferase OS=Nicotiana tabacum OX=4097 PE=2 SV=1 && PF02798:Glutathione S-transferase, N-terminal domain	-
Solyc01g111510_3	326.7475107	373.8157299	327.7839727	744.8341011	616.4517387	760.7458635	342.7824044	707.3439011	-1.046643547	4.83E-12	8.99E-11	Solyc01g111510_3	1	97648115	97653258	-	1270	protein_coding	NA && sp|Q42564|APX3_ARATH L-ascorbate peroxidase 3 OS=Arabidopsis thaliana OX=3702 GN=APX3 PE=1 SV=1 && PF00141:Peroxidase	MYB_related
Solyc06g075780_2	515.9171222	682.6827808	415.4206599	226.5292689	176.4508631	126.7909772	538.0068543	176.5903698	1.607440066	4.87E-12	9.06E-11	Solyc06g075780_2	6	47233894	47237689	+	849	protein_coding	NA && sp|Q9SLD4|ZAT11_ARATH Zinc finger protein ZAT11 OS=Arabidopsis thaliana OX=3702 GN=ZAT11 PE=2 SV=1 && PF13912:C2H2-type zinc finger	C2H2
Solyc04g077860_3	21.49654676	5.773215906	2.276277588	149.5533038	175.7000083	97.48251015	9.848680084	140.9119408	-3.877867322	5.34E-12	9.91E-11	Solyc04g077860_3	4	62827873	62830497	-	1520	protein_coding	NA && sp|J9U5U9|DAD2_PETHY Probable strigolactone esterase DAD2 OS=Petunia hybrida OX=4102 GN=DAD2 PE=1 SV=1 && PF12697:Alpha/beta hydrolase family	-
Solyc01g106060_3	279.4551078	417.1148492	343.7179158	112.8980823	81.09231154	39.50271653	346.7626243	77.83103678	2.159526169	5.44E-12	1.01E-10	Solyc01g106060_3	1	93934323	93940059	-	1175	protein_coding	NA && sp|O82225|GGP5_ARATH Gamma-glutamyl peptidase 5 OS=Arabidopsis thaliana OX=3702 GN=GGP5 PE=2 SV=1 && PF00117:Glutamine amidotransferase class-I	-
Solyc06g048930_3	116.0813525	181.856301	118.3664346	24.1924462	21.77478736	14.01709296	138.7680294	19.99477551	2.799081733	5.54E-12	1.02E-10	Solyc06g048930_3	6	32052419	32056459	-	2323	protein_coding	NA && sp|Q9FPR6|ARR17_ARATH Two-component response regulator ARR17 OS=Arabidopsis thaliana OX=3702 GN=ARR17 PE=2 SV=1 && PF00072:Response regulator receiver domain	M-type_MADS
Solyc03g119080_3	472.9240287	396.9085935	381.276496	953.0357593	783.8923449	772.8515347	417.0363727	836.593213	-1.005859926	5.63E-12	1.04E-10	Solyc03g119080_3	3	69264228	69280854	-	8039	protein_coding	NA && sp|Q9LV35|AIP12_ARATH Actin-interacting protein 1-2 OS=Arabidopsis thaliana OX=3702 GN=AIP1-2 PE=2 SV=1 && -	C2H2
Solyc10g055670_2	186.3034052	268.4545396	204.8649829	598.9463195	560.1376334	468.2983331	219.8743093	542.460762	-1.304077986	5.76E-12	1.06E-10	Solyc10g055670_2	10	57122220	57132754	+	2324	protein_coding	NA && sp|Q9SZN1|VATB2_ARATH V-type proton ATPase subunit B2 OS=Arabidopsis thaliana OX=3702 GN=VHA-B2 PE=1 SV=1 && PF02874:ATP synthase alpha/beta family, beta-barrel domain|PF00006:ATP synthase alpha/beta family, nucleotide-binding domain	MYB_related
Solyc01g080890_2	369.7406042	383.9188577	432.4927418	157.6174525	126.8944505	169.4793967	395.3840679	151.3304332	1.385217681	5.79E-12	1.07E-10	Solyc01g080890_2	1	80070459	80071078	+	620	protein_coding	NA && - && -	Dof
Solyc04g007710_3	391.237151	417.1148492	431.354603	160.5498702	189.9662483	159.9222879	413.2355344	170.1461355	1.281677463	5.95E-12	1.10E-10	Solyc04g007710_3	4	1389747	1396547	-	2021	protein_coding	NA && sp|Q9LV37|MPK9_ARATH Mitogen-activated protein kinase 9 OS=Arabidopsis thaliana OX=3702 GN=MPK9 PE=2 SV=2 && PF00069:Protein kinase domain	HB-other
Solyc02g014720_3	270.8564891	282.8875794	216.2463709	574.0207689	526.3491703	639.6891515	256.6634798	580.0196969	-1.180628458	6.10E-12	1.12E-10	Solyc02g014720_3	2	18451250	18459255	+	1074	protein_coding	NA && sp|P54168|YPGQ_BACSU Uncharacterized protein YpgQ OS=Bacillus subtilis (strain 168) OX=224308 GN=ypgQ PE=4 SV=1 && -	-
Solyc08g008380_3	229.2964987	246.80498	233.3184528	79.17527846	39.0444463	47.78554419	236.4733105	55.33508965	2.096268884	6.16E-12	1.13E-10	Solyc08g008380_3	8	2803340	2808738	+	2797	protein_coding	NA && sp|Q9XED8|ARFI_ARATH Auxin response factor 9 OS=Arabidopsis thaliana OX=3702 GN=ARF9 PE=1 SV=1 && PF06507:Auxin response factor|PF02309:AUX/IAA family|PF02362:B3 DNA binding domain	ARF
Solyc03g025720_3	151.9089304	163.0933493	120.6427122	352.6232309	387.441044	445.9984124	145.2149973	395.3542291	-1.45032837	6.75E-12	1.24E-10	Solyc03g025720_3	3	3160346	3166495	+	4280	protein_coding	NA && sp|M4IQQ7|CCL9_HUMLU Probable CoA ligase CCL9 OS=Humulus lupulus OX=3486 GN=CCL9 PE=2 SV=1 && PF13193:AMP-binding enzyme C-terminal domain|PF00501:AMP-binding enzyme	NAC
Solyc06g054630_2	133.2785899	152.9902215	48.93996815	0	0	1.274281178	111.7362598	0.424760393	7.909036841	6.81E-12	1.25E-10	Solyc06g054630_2	6	37473694	37480765	+	579	protein_coding	NA && sp|Q84QC2|ERF17_ARATH Ethylene-responsive transcription factor ERF017 OS=Arabidopsis thaliana OX=3702 GN=ERF017 PE=2 SV=1 && PF00847:AP2 domain	ERF
Solyc04g080510_3	40.12688728	151.5469175	84.22227077	0	0	1.911421768	91.96535852	0.637140589	7.057652399	6.86E-12	1.26E-10	Solyc04g080510_3	4	64750817	64754931	-	3518	protein_coding	NA && sp|Q9LEV3|CBSX3_ARATH CBS domain-containing protein CBSX3, mitochondrial OS=Arabidopsis thaliana OX=3702 GN=CBSX3 PE=1 SV=1 && PF00571:CBS domain	bHLH
Solyc04g079210_3	204.9337458	190.5161249	244.6998407	63.046981	45.05128419	30.58274828	213.3832371	46.22700449	2.212319871	7.12E-12	1.30E-10	Solyc04g079210_3	4	63838153	63866898	-	5128	protein_coding	NA && sp|O48723|PLP2_ARATH Patatin-like protein 2 OS=Arabidopsis thaliana OX=3702 GN=PLP2 PE=1 SV=1 && PF01734:Patatin-like phospholipase	-
Solyc01g112080_3	384.0716354	311.7536589	284.5346985	85.04011391	129.8978694	84.73969836	326.7866643	99.89256056	1.710684469	7.37E-12	1.35E-10	Solyc01g112080_3	1	98103732	98105483	+	1489	protein_coding	NA && sp|O23006|LYM2_ARATH LysM domain-containing GPI-anchored protein 2 OS=Arabidopsis thaliana OX=3702 GN=LYM2 PE=1 SV=1 && PF01476:LysM domain	CO-like
Solyc08g015870_3	669.2591557	575.8782866	421.1113538	214.0664936	235.0175325	225.5477686	555.4162654	224.8772649	1.302034056	7.66E-12	1.40E-10	Solyc08g015870_3	8	6169553	6174496	-	1877	protein_coding	NA && sp|O49621|MLO1_ARATH MLO-like protein 1 OS=Arabidopsis thaliana OX=3702 GN=MLO1 PE=1 SV=1 && PF03094:Mlo family	ARF
Solyc08g074970_1	91.7185995	90.92815051	119.5045734	11.72967088	10.51196631	11.46853061	100.7171078	11.2367226	3.165344883	7.70E-12	1.41E-10	Solyc08g074970_1	8	59224125	59225570	-	1446	protein_coding	NA && - && PF00534:Glycosyl transferases group 1|PF13439:Glycosyltransferase Family 4	-
Solyc01g087820_2	180.5709928	271.3411476	112.6757406	568.1559334	554.1307955	603.372138	188.1959603	575.2196223	-1.619369578	8.18E-12	1.49E-10	Solyc01g087820_2	1	82577802	82580412	+	2611	protein_coding	NA && sp|O82777|SBT3_SOLLC Subtilisin-like protease SBT3 OS=Solanum lycopersicum OX=4081 GN=sbt3 PE=1 SV=1 && PF05922:Peptidase inhibitor I9|PF00082:Subtilase family|PF17766:Fibronectin type-III domain	bHLH
Solyc01g095720_3	63.05653716	106.8044943	104.7087691	5.864835442	6.006837892	0	91.52326682	3.957224445	4.565751412	8.46E-12	1.54E-10	Solyc01g095720_3	1	86785926	86793750	+	3712	protein_coding	NA && sp|Q7Y220|PLIP1_ARATH Phospholipase A1 PLIP1, chloroplastic OS=Arabidopsis thaliana OX=3702 GN=PLIP1 PE=1 SV=1 && PF01764:Lipase (class 3)	-
Solyc06g073080_3	50.1586091	79.3817187	71.70274403	0	0	0	67.08102394	0	9.014883901	8.68E-12	1.58E-10	Solyc06g073080_3	6	45159544	45162655	-	1500	protein_coding	NA && sp|Q9FLV0|DMR6_ARATH Protein DOWNY MILDEW RESISTANCE 6 OS=Arabidopsis thaliana OX=3702 GN=DMR6 PE=1 SV=1 && PF14226:non-haem dioxygenase in morphine synthesis N-terminal|PF03171:2OG-Fe(II) oxygenase superfamily	C3H
Solyc02g089290_3	424.1985227	363.7126021	396.0723004	129.7594841	150.921802	175.8508026	394.6611417	152.1773629	1.373329183	8.83E-12	1.60E-10	Solyc02g089290_3	2	51793294	51799225	-	3538	protein_coding	NA && sp|Q9LFV3|CRLK2_ARATH Calcium/calmodulin-regulated receptor-like kinase 2 OS=Arabidopsis thaliana OX=3702 GN=CRLK2 PE=2 SV=1 && PF07714:Protein tyrosine kinase	WRKY
Solyc02g071610_3	54.45791845	85.15493461	72.84088282	2.932417721	0	2.548562357	70.81791196	1.826993359	5.25311805	9.37E-12	1.70E-10	Solyc02g071610_3	2	41578762	41586839	+	2526	protein_coding	NA && sp|Q9C7N4|GDL15_ARATH GDSL esterase/lipase At1g29670 OS=Arabidopsis thaliana OX=3702 GN=At1g29670 PE=2 SV=1 && PF00657:GDSL-like Lipase/Acylhydrolase	ERF
Solyc06g008260_3	652.0619183	545.5689031	643.0484187	320.366636	251.5363367	287.9875463	613.5597467	286.630173	1.098430937	9.83E-12	1.78E-10	Solyc06g008260_3	6	2133393	2136782	+	775	protein_coding	NA && sp|Q9SIM4|RL141_ARATH 60S ribosomal protein L14-1 OS=Arabidopsis thaliana OX=3702 GN=RPL14A PE=2 SV=1 && PF01929:Ribosomal protein L14	CAMTA
Solyc06g068210_2	20.06344364	20.20625567	10.24324915	95.30357593	139.658981	207.0706915	16.83764949	147.3444161	-3.148924489	9.90E-12	1.79E-10	Solyc06g068210_2	6	42368606	42375000	-	3528	protein_coding	NA && sp|Q9S793|FRS8_ARATH Protein FAR1-RELATED SEQUENCE 8 OS=Arabidopsis thaliana OX=3702 GN=FRS8 PE=2 SV=2 && PF10551:MULE transposase domain|PF03101:FAR1 DNA-binding domain	FAR1
Solyc07g007400_3	31.52826858	5.773215906	22.76277588	137.0905285	204.9833431	156.0994444	20.02142012	166.057772	-3.045226176	9.94E-12	1.80E-10	Solyc07g007400_3	7	2129812	2139657	-	2619	protein_coding	NA && - && PF13855:Leucine rich repeat	-
Solyc08g076060_3	31.52826858	28.86607953	38.696719	211.1340759	147.9183831	163.1079908	33.0303557	174.0534833	-2.390345911	1.04E-11	1.89E-10	Solyc08g076060_3	8	60233084	60236685	+	2896	protein_coding	NA && sp|Q9LW83|CE101_ARATH G-type lectin S-receptor-like serine/threonine-protein kinase CES101 OS=Arabidopsis thaliana OX=3702 GN=CES101 PE=2 SV=2 && PF08276:PAN-like domain|PF07714:Protein tyrosine kinase|PF11883:Domain of unknown function (DUF3403)|PF01453:D-mannose binding lectin	MYB_related
Solyc08g061250_3	74.52136209	40.41251134	15.93394312	280.0458923	280.8196715	221.0877844	43.62260552	260.6511161	-2.596536411	1.11E-11	2.00E-10	Solyc08g061250_3	8	48374469	48377521	+	2597	protein_coding	NA && sp|Q9ZUF4|RIPK_ARATH Serine/threonine-protein kinase RIPK OS=Arabidopsis thaliana OX=3702 GN=RIPK PE=1 SV=1 && PF07714:Protein tyrosine kinase	WRKY
Solyc10g076890_2	305.250964	420.0014571	340.3034994	142.9553639	95.35855154	119.1452902	355.1853068	119.1530685	1.574888569	1.11E-11	2.00E-10	Solyc10g076890_2	10	59960693	59967852	+	1183	protein_coding	NA && sp|Q9LFD5|BPA1_ARATH Binding partner of ACD11 1 OS=Arabidopsis thaliana OX=3702 GN=BPA1 PE=1 SV=1 && PF00076:RNA recognition motif. (a.k.a. RRM, RBD, or RNP domain)	B3
Solyc02g081030_3	715.1184555	707.2189484	606.6279773	288.8431455	339.3863409	359.9844329	676.3217937	329.4046398	1.03578923	1.12E-11	2.02E-10	Solyc02g081030_3	2	45639309	45651748	-	3147	protein_coding	NA && sp|Q5XEZ5|CSC1_ARATH Calcium permeable stress-gated cation channel 1 OS=Arabidopsis thaliana OX=3702 GN=CSC1 PE=1 SV=1 && PF02714:Calcium-dependent channel, 7TM region, putative phosphate|PF14703:Cytosolic domain of 10TM putative phosphate transporter|PF13967:Late exocytosis, associated with Golgi transport	BBR-BPC
Solyc06g072030_1	286.6206234	317.5268748	239.0091468	76.97596517	75.08547365	103.853916	281.052215	85.30511829	1.71563318	1.13E-11	2.03E-10	Solyc06g072030_1	6	44535729	44535908	+	180	protein_coding	NA && - && -	-
Solyc11g067010_2	345.3778512	320.4134828	203.7268442	609.9428859	876.2474775	709.7746164	289.8393927	731.9883266	-1.341398145	1.15E-11	2.07E-10	Solyc11g067010_2	11	53073624	53078261	-	695	protein_coding	NA && sp|Q94DE2|BD31A_ORYSJ Protein BUD31 homolog 1 OS=Oryza sativa subsp. japonica OX=39947 GN=Os01g0857700 PE=2 SV=1 && PF01125:G10 protein	-
Solyc12g010980_2	177.7047865	127.0107499	159.3394312	8.797253163	33.03760841	17.8399365	154.6849892	19.89159936	2.962824009	1.18E-11	2.12E-10	Solyc12g010980_2	12	3842417	3843916	-	1417	protein_coding	NA && sp|O64988|BEATH_CLABR Acetyl-CoA-benzylalcohol acetyltransferase OS=Clarkia breweri OX=36903 GN=BEAT PE=1 SV=1 && PF02458:Transferase family	CAMTA
Solyc03g121340_1	161.9406522	157.3201334	245.8379795	35.18901265	18.77136841	44.59984124	188.3662551	32.85340744	2.516205832	1.21E-11	2.16E-10	Solyc03g121340_1	3	70948952	70949212	+	261	protein_coding	NA && - && -	-
Solyc10g076990_2	273.7226954	411.3416333	265.186339	639.2670632	823.687646	755.0115982	316.7502226	739.3221024	-1.225967461	1.31E-11	2.34E-10	Solyc10g076990_2	10	60008765	60025575	+	5739	protein_coding	NA && sp|Q8RXE7|AGD14_ARATH Probable ADP-ribosylation factor GTPase-activating protein AGD14 OS=Arabidopsis thaliana OX=3702 GN=AGD14 PE=1 SV=2 && PF09331:Domain of unknown function (DUF1985)|PF01412:Putative GTPase activating protein for Arf	B3
Solyc06g083900_3	113.2151463	96.70136642	121.780851	3.665522151	17.26965894	8.282827659	110.5657879	9.73933625	3.511935908	1.38E-11	2.46E-10	Solyc06g083900_3	6	49240718	49242115	-	1109	protein_coding	NA && sp|Q9LNC9|MYB13_ARATH Transcription factor MYB13 OS=Arabidopsis thaliana OX=3702 GN=MYB13 PE=1 SV=1 && PF00249:Myb-like DNA-binding domain	MYB
Solyc05g053080_2	166.2399616	215.0522925	191.2073174	23.45934177	9.010256838	43.96270065	190.8331905	25.47743309	2.894297257	1.40E-11	2.49E-10	Solyc05g053080_2	5	64059853	64062269	+	620	protein_coding	NA && - && -	-
Solyc07g064240_3	295.2192421	209.2790766	151.3724596	35.92211708	49.55641261	14.01709296	218.6235928	33.16520755	2.726438441	1.41E-11	2.51E-10	Solyc07g064240_3	7	66594253	66595344	+	585	protein_coding	NA && sp|Q8LC95|ENL3_ARATH Early nodulin-like protein 3 OS=Arabidopsis thaliana OX=3702 GN=At5g25090 PE=2 SV=2 && PF02298:Plastocyanin-like domain	HD-ZIP
Solyc08g068390_3	31.52826858	23.09286362	52.35438453	188.4078386	160.6829136	244.6619862	35.65850558	197.9175795	-2.456254772	1.49E-11	2.66E-10	Solyc08g068390_3	8	57579149	57584636	+	2667	protein_coding	NA && sp|Q9ZPI6|AIM1_ARATH Peroxisomal fatty acid beta-oxidation multifunctional protein AIM1 OS=Arabidopsis thaliana OX=3702 GN=AIM1 PE=1 SV=1 && PF00378:Enoyl-CoA hydratase/isomerase|PF00725:3-hydroxyacyl-CoA dehydrogenase, C-terminal domain|PF02737:3-hydroxyacyl-CoA dehydrogenase, NAD binding domain	MYB_related
Solyc02g071130_3	77.38756833	37.52590339	20.48649829	266.1169082	239.5226609	237.6534398	45.13332334	247.7643363	-2.472585313	1.58E-11	2.81E-10	Solyc02g071130_3	2	41178986	41180342	-	855	protein_coding	NA && sp|Q93WV4|WRK71_ARATH WRKY transcription factor 71 OS=Arabidopsis thaliana OX=3702 GN=WRKY71 PE=2 SV=1 && PF03106:WRKY DNA -binding domain	WRKY
Solyc10g086520_2	80.25377456	60.61876701	86.49854835	0	4.505128419	0	75.79036331	1.501709473	5.718253145	1.66E-11	2.95E-10	Solyc10g086520_2	10	65433198	65435216	-	1274	protein_coding	NA && sp|O80932|EXPA3_ARATH Expansin-A3 OS=Arabidopsis thaliana OX=3702 GN=EXPA3 PE=2 SV=1 && PF03330:Lytic transglycolase|PF01357:Pollen allergen	bZIP
Solyc05g050000_3	194.9020239	215.0522925	175.2733743	391.4777657	515.0863492	632.0434645	195.0758969	512.8691932	-1.397590654	1.67E-11	2.96E-10	Solyc05g050000_3	5	60674231	60707049	-	3713	protein_coding	NA && sp|A7PZL3|PGLR_VITVI Probable polygalacturonase OS=Vitis vinifera OX=29760 GN=GSVIVT00026920001 PE=1 SV=1 && PF06859:Bicoid-interacting protein 3 (Bin3)|PF00295:Glycosyl hydrolases family 28	MYB_related
Solyc09g091990_3	554.6109063	583.0948065	619.147504	259.5189683	184.7102652	294.3589522	585.6177389	246.1960619	1.248913778	1.69E-11	2.99E-10	Solyc09g091990_3	9	71660409	71663231	+	2823	protein_coding	NA && sp|O48837|LRKS2_ARATH Receptor like protein kinase S.2 OS=Arabidopsis thaliana OX=3702 GN=LECRKS2 PE=2 SV=2 && PF00069:Protein kinase domain|PF07714:Protein tyrosine kinase	S1Fa-like
Solyc11g007330_2	38.69378416	85.15493461	88.77482594	2.932417721	1.501709473	2.548562357	70.8745149	2.327563184	4.924408213	1.72E-11	3.04E-10	Solyc11g007330_2	11	1705869	1707983	-	715	protein_coding	NA && - && PF04949:Transcriptional activator	S1Fa-like
Solyc01g112280_3	100.3172182	147.2170056	206.0031217	429.5991961	459.5230987	457.466943	151.1791152	448.8630793	-1.561970481	1.75E-11	3.10E-10	Solyc01g112280_3	1	98256976	98260811	-	1772	protein_coding	NA && sp|Q99JW2|ACY1_MOUSE Aminoacylase-1 OS=Mus musculus OX=10090 GN=Acy1 PE=1 SV=1 && PF01546:Peptidase family M20/M25/M40	ERF
Solyc08g080690_3	333.9130263	318.9701788	305.0211968	738.9692657	768.1243955	555.5865938	319.3014673	687.560085	-1.10672123	1.83E-11	3.23E-10	Solyc08g080690_3	8	64016196	64033661	-	6999	protein_coding	NA && sp|Q25AG5|ERG3_ORYSI Elicitor-responsive protein 3 OS=Oryza sativa subsp. indica OX=39946 GN=ERG3 PE=2 SV=1 && PF01429:Methyl-CpG binding domain	-
Solyc03g119590_1	160.5075491	236.7018521	185.5166234	39.58763923	49.55641261	49.69696596	194.2420082	46.28033927	2.067930557	1.84E-11	3.25E-10	Solyc03g119590_1	3	69639046	69639381	+	336	protein_coding	NA && - && -	-
Solyc04g015020_3	100.3172182	92.37145449	54.63066212	340.1604556	319.8641178	240.8391427	82.43977827	300.2879054	-1.873864581	1.87E-11	3.29E-10	Solyc04g015020_3	4	5226834	5228903	-	1339	protein_coding	NA && - && -	-
Solyc11g022460_2	21.49654676	30.3093835	28.45346985	130.4925886	146.4166736	194.3278797	26.75313337	157.0790473	-2.552061324	1.88E-11	3.31E-10	Solyc11g022460_2	11	13948948	13952010	-	2829	protein_coding	NA && sp|Q60EW9|FTIP7_ORYSJ FT-interacting protein 7 OS=Oryza sativa subsp. japonica OX=39947 GN=FTIP7 PE=1 SV=1 && PF08372:Plant phosphoribosyltransferase C-terminal|PF00168:C2 domain	bZIP
Solyc05g052620_3	156.2082398	112.5777102	141.1292105	377.5487816	378.4307872	342.1444964	136.6383868	366.0413551	-1.420197133	1.97E-11	3.46E-10	Solyc05g052620_3	5	63673315	63679190	-	2115	protein_coding	NA && sp|O04197|COI1_ARATH Coronatine-insensitive protein 1 OS=Arabidopsis thaliana OX=3702 GN=COI1 PE=1 SV=1 && PF18791:Transport inhibitor response 1 protein domain	FAR1
Solyc03g111100_1	44.42619663	95.25806244	54.63066212	0	0	0	64.7716404	0	8.962566567	2.03E-11	3.57E-10	Solyc03g111100_1	3	63251006	63251938	-	933	protein_coding	NA && - && -	-
Solyc03g093360_3	735.1818991	591.7546303	666.9493334	327.6976803	310.1030062	205.7964103	664.6286209	281.1990323	1.24291435	2.08E-11	3.65E-10	Solyc03g093360_3	3	56060057	56061195	+	807	protein_coding	NA && sp|O65660|PLAT1_ARATH PLAT domain-containing protein 1 OS=Arabidopsis thaliana OX=3702 GN=PLAT1 PE=1 SV=1 && PF06232:Embryo-specific protein 3, (ATS3)	-
Solyc06g069150_1	87.41929015	92.37145449	22.76277588	362.886693	326.6218104	312.8360293	67.51784017	334.1148442	-2.322200923	2.18E-11	3.82E-10	Solyc06g069150_1	6	43046565	43047302	+	738	protein_coding	NA && - && -	ERF
Solyc01g079450_3	236.4620143	284.3308834	221.9370649	654.6622562	657.7487492	463.8383489	247.5766542	592.0831181	-1.259422313	2.18E-11	3.83E-10	Solyc01g079450_3	1	78363128	78373913	-	3901	protein_coding	NA && sp|Q8VZF3|CGEP_ARATH Probable glutamyl endopeptidase, chloroplastic OS=Arabidopsis thaliana OX=3702 GN=GEP PE=2 SV=2 && PF00326:Prolyl oligopeptidase family	-
Solyc08g076335_1	728.0163835	489.280048	639.6340023	296.9072942	209.4884715	266.3247663	618.9768113	257.5735107	1.264797446	2.21E-11	3.88E-10	Solyc08g076335_1	8	60428238	60429119	-	300	protein_coding	NA && sp|P49689|RS30_ARATH 40S ribosomal protein S30 OS=Arabidopsis thaliana OX=3702 GN=RPS30A PE=3 SV=3 && -	-
Solyc11g012590_2	73.08825898	43.29911929	99.01807509	2.199313291	0.750854737	3.822843535	71.80181779	2.257670521	4.963647704	2.27E-11	3.97E-10	Solyc11g012590_2	11	5386379	5392481	+	1122	protein_coding	NA && sp|B9SA89|CSPLB_RICCO CASP-like protein 2B1 OS=Ricinus communis OX=3988 GN=RCOM_0864260 PE=2 SV=1 && PF04535:Domain of unknown function (DUF588)|PF06624:Ribosome associated membrane protein RAMP4	MYB_related
Solyc01g096190_3	293.786139	259.7947158	241.2854244	41.05384809	88.60085891	29.3084671	264.9554264	52.9877247	2.326937687	2.28E-11	3.98E-10	LCA1	1	87159841	87165677	+	3497	protein_coding	NA && sp|Q42883|ECAP_SOLLC Calcium-transporting ATPase, endoplasmic reticulum-type OS=Solanum lycopersicum OX=4081 GN=LCA1 PE=2 SV=1 && PF00122:E1-E2 ATPase|PF13246:Cation transport ATPase (P-type)|PF00702:haloacid dehalogenase-like hydrolase|PF00690:Cation transporter/ATPase, N-terminus|PF00689:Cation transporting ATPase, C-terminus	SBP
Solyc07g063733_1	139.0110024	144.3303976	190.0691786	27.85796835	13.51538526	34.40559182	157.8035262	25.25964847	2.638334576	2.31E-11	4.03E-10	Solyc07g063733_1	7	66244109	66246314	+	928	protein_coding	NA && - && -	-
Solyc01g058260_3	368.3075011	432.9911929	452.9792401	157.6174525	78.0888926	155.4623038	418.0926447	130.3895496	1.67960535	2.44E-11	4.25E-10	Solyc01g058260_3	1	65866151	65871282	-	2447	protein_coding	NA && sp|Q56XM9|PAPS3_ARATH Nuclear poly(A) polymerase 3 OS=Arabidopsis thaliana OX=3702 GN=PAPS3 PE=1 SV=1 && PF04928:Poly(A) polymerase central domain	MYB_related
Solyc10g008980_3	10.03172182	7.216519882	20.48649829	119.4960221	126.1435957	115.9595872	12.57824667	120.5330684	-3.226911565	2.45E-11	4.27E-10	Solyc10g008980_3	10	2993138	2997359	+	1557	protein_coding	NA && sp|P29463|TPT_SOLTU Triose phosphate/phosphate translocator, chloroplastic OS=Solanum tuberosum OX=4113 GN=TPT PE=2 SV=1 && PF03151:Triose-phosphate Transporter family	HB-other
Solyc09g056385_1	596.1708967	469.0737923	632.8051695	71.84423416	18.02051368	28.03418592	566.0166195	39.29964459	3.849282908	2.46E-11	4.28E-10	Solyc09g056385_1	9	49157529	49158245	-	717	protein_coding	NA && sp|Q9LSE7|B561C_ARATH Cytochrome b561 and DOMON domain-containing protein At3g25290 OS=Arabidopsis thaliana OX=3702 GN=At3g25290 PE=2 SV=1 && PF04526:Protein of unknown function (DUF568)	-
Solyc06g069590_3	63.05653716	64.94867894	54.63066212	0	0	0	60.87862607	0	8.873556374	2.56E-11	4.44E-10	Solyc06g069590_3	6	43457898	43460564	+	2265	protein_coding	NA && - && -	bHLH
Solyc03g019890_3	427.0647289	334.8465225	472.3275996	46.91868353	13.51538526	12.74281178	411.4129503	24.39229353	4.078974029	2.56E-11	4.45E-10	Solyc03g019890_3	3	62765039	62776312	-	4718	protein_coding	NA && sp|Q5N8X6|BGAL3_ORYSJ Beta-galactosidase 3 OS=Oryza sativa subsp. japonica OX=39947 GN=Os01g0875500 PE=3 SV=1 && PF02140:Galactose binding lectin domain|PF17834:Beta-sandwich domain in beta galactosidase|PF01301:Glycosyl hydrolases family 35	MYB_related
Solyc05g010423_1	1018.936316	805.3636188	902.5440638	375.3494683	364.1645472	540.2952196	908.9479996	426.6030784	1.08963023	2.57E-11	4.45E-10	Solyc05g010423_1	5	4655837	4658080	-	207	protein_coding	NA && - && -	-
Solyc04g080600_3	639.1639903	352.1661702	364.2044141	167.1478101	84.09573049	129.3395396	451.8448582	126.8610267	1.830936104	2.58E-11	4.46E-10	Solyc04g080600_3	4	64799380	64806289	+	4928	protein_coding	NA && sp|Q9FWS1|AUL1_ARATH Auxilin-like protein 1 OS=Arabidopsis thaliana OX=3702 GN=AUL1 PE=2 SV=2 && -	HB-other
Solyc07g063870_3	329.6137169	151.5469175	306.1593356	620.9394524	793.6534565	763.2944258	262.43999	725.9624449	-1.465302966	2.61E-11	4.51E-10	Solyc07g063870_3	7	66359533	66365878	+	4140	protein_coding	NA && sp|Q0DA21|BGL25_ORYSJ Beta-glucosidase 25 OS=Oryza sativa subsp. japonica OX=39947 GN=BGLU25 PE=2 SV=2 && -	C2H2
Solyc02g078610_3	124.6799712	128.4540539	135.4385165	447.1937024	360.4102735	298.1817957	129.5241805	368.5952572	-1.506846551	2.61E-11	4.51E-10	Solyc02g078610_3	2	43826729	43836570	+	1760	protein_coding	NA && sp|Q13435|SF3B2_HUMAN Splicing factor 3B subunit 2 OS=Homo sapiens OX=9606 GN=SF3B2 PE=1 SV=2 && PF04046:PSP|PF04037:Domain of unknown function (DUF382)	Dof
Solyc03g045090_3	249.3599424	241.0317641	196.8980114	480.9165062	521.8440419	521.8181425	229.0965726	508.1928969	-1.153310166	2.62E-11	4.53E-10	Solyc03g045090_3	3	11518687	11523574	-	1597	protein_coding	NA && - && PF03661:Uncharacterised protein family (UPF0121)	-
Solyc07g053165_1	431.3640383	487.836744	393.7960228	206.7354493	174.1982989	149.7280385	437.6656017	176.8872622	1.307157429	2.82E-11	4.87E-10	Solyc07g053165_1	7	61742178	61746738	-	753	protein_coding	NA && sp|Q39008|M3K1_ARATH Mitogen-activated protein kinase kinase kinase 1 OS=Arabidopsis thaliana OX=3702 GN=MEKK1 PE=1 SV=2 && PF00069:Protein kinase domain	WRKY
Solyc01g108910_3	170.5392709	394.0219856	293.6398089	1249.943054	1366.55562	1264.086929	286.0670218	1293.528534	-2.176785755	2.89E-11	4.98E-10	Solyc01g108910_3	1	95951006	95953706	-	1586	protein_coding	NA && sp|Q9XIM0|MEE14_ARATH CCG-binding protein 1 OS=Arabidopsis thaliana OX=3702 GN=MEE14 PE=1 SV=1 && -	-
Solyc06g072018_1	533.1143596	571.5483747	505.3336246	257.319655	274.0619788	247.2105486	536.6654529	259.5307275	1.047781149	3.05E-11	5.24E-10	Solyc06g072018_1	6	44533390	44533823	+	324	protein_coding	NA && sp|P0DI74|S61G1_ARATH Protein transport protein Sec61 subunit gamma-1 OS=Arabidopsis thaliana OX=3702 GN=SEC61G1 PE=1 SV=1 && -	C2H2
Solyc01g096590_3	546.0122876	458.9706645	380.1383572	147.3539905	215.4953094	133.1623831	461.7071031	165.3372277	1.481935433	3.27E-11	5.61E-10	Solyc01g096590_3	1	87532948	87534986	-	622	protein_coding	NA && sp|Q9STY6|RS202_ARATH 40S ribosomal protein S20-2 OS=Arabidopsis thaliana OX=3702 GN=RPS20B PE=2 SV=1 && PF00338:Ribosomal protein S10p/S20e	NAC
Solyc04g082060_3	42.99309351	40.41251134	69.42646644	200.8706139	209.4884715	233.8305962	50.94402377	214.7298939	-2.063059755	3.35E-11	5.75E-10	Solyc04g082060_3	4	65939537	65944790	-	4067	protein_coding	NA && sp|Q3EBZ2|SKI23_ARATH F-box protein SKIP23 OS=Arabidopsis thaliana OX=3702 GN=SKIP23 PE=1 SV=1 && PF03478:Protein of unknown function (DUF295)	C2H2
Solyc08g066500_3	707.9529399	627.8372297	547.44476	172.2795411	216.2461641	323.6674193	627.7449765	237.3977082	1.399681893	3.42E-11	5.86E-10	Solyc08g066500_3	8	55270176	55276623	-	3561	protein_coding	NA && sp|Q9ZU11|ATB15_ARATH Homeobox-leucine zipper protein ATHB-15 OS=Arabidopsis thaliana OX=3702 GN=ATHB-15 PE=1 SV=1 && PF00046:Homeodomain|PF08670:MEKHLA domain|PF01852:START domain	HD-ZIP
Solyc11g040105_1	96.01790885	41.85581532	50.07810694	0	0	0	62.65061037	0	8.914443659	3.53E-11	6.05E-10	Solyc11g040105_1	11	40155422	40157370	-	1476	protein_coding	NA && sp|P08770|TRA1_MAIZE Putative AC transposase OS=Zea mays OX=4577 PE=2 SV=2 && PF05699:hAT family C-terminal dimerisation region|PF14372:Domain of unknown function (DUF4413)	bHLH
Solyc09g092250_3	193.4689208	239.5884601	136.5766553	475.7847752	450.5128419	642.2377139	189.8780121	522.8451103	-1.4677632	3.58E-11	6.13E-10	Solyc09g092250_3	9	71863432	71872307	+	3766	protein_coding	NA && - && -	-
Solyc03g117760_3	553.1778032	596.0845423	505.3336246	177.4112721	220.0004378	285.438984	551.53199	227.616898	1.274028358	3.69E-11	6.32E-10	Solyc03g117760_3	3	68280363	68283469	-	1627	protein_coding	NA && - && -	-
Solyc11g069270_2	437.0964507	500.8264798	487.1234039	205.2692405	76.58718312	73.90830835	475.0154448	118.588244	2.003920379	4.15E-11	7.08E-10	Solyc11g069270_2	11	54193977	54201467	+	3025	protein_coding	NA && sp|Q9SCV4|BGAL8_ARATH Beta-galactosidase 8 OS=Arabidopsis thaliana OX=3702 GN=BGAL8 PE=2 SV=2 && PF01301:Glycosyl hydrolases family 35|PF02140:Galactose binding lectin domain|PF17834:Beta-sandwich domain in beta galactosidase	MYB_related
Solyc01g108360_3	40.12688728	119.79423	109.2613242	4.398626581	7.508547365	1.274281178	89.72748052	4.393818375	4.376794346	4.31E-11	7.36E-10	Solyc01g108360_3	1	95592188	95593039	+	755	protein_coding	NA && - && -	-
Solyc02g078620_1	51.59171222	79.3817187	47.80182935	0	0	0	59.59175342	0	8.841965127	4.37E-11	7.45E-10	Solyc02g078620_1	2	43840697	43841551	+	855	protein_coding	NA && sp|Q84TE9|DOF53_ARATH Dof zinc finger protein DOF5.3 OS=Arabidopsis thaliana OX=3702 GN=DOF5.3 PE=2 SV=1 && PF02701:Dof domain, zinc finger	Dof
Solyc09g065383_1	193.4689208	170.3098692	215.1082321	442.7950759	430.9906188	461.2897866	192.9623407	445.0251604	-1.202456436	4.66E-11	7.92E-10	Solyc09g065383_1	9	63728014	63729161	+	195	protein_coding	NA && - && -	-
Solyc02g031990_1	11.46482494	14.43303976	18.21022071	77.7090696	177.2017178	143.3566326	14.70269514	132.7558067	-3.163404742	4.79E-11	8.13E-10	Solyc02g031990_1	2	27743970	27744518	+	549	protein_coding	NA && sp|Q9LIE6|VQ22_ARATH VQ motif-containing protein 22 OS=Arabidopsis thaliana OX=3702 GN=VQ22 PE=2 SV=1 && PF05678:VQ motif	-
Solyc03g082500_3	491.5543692	466.1871844	524.6819841	225.0630601	174.9491536	244.6619862	494.1411792	214.8914	1.200561657	4.90E-11	8.30E-10	Solyc03g082500_3	3	53851863	53860735	+	2695	protein_coding	NA && sp|Q9FIM9|CAMK4_ARATH CDPK-related kinase 4 OS=Arabidopsis thaliana OX=3702 GN=CRK4 PE=1 SV=1 && PF00069:Protein kinase domain	C2H2
Solyc08g075020_3	107.4827338	121.237534	96.7417975	4.398626581	9.010256838	17.8399365	108.4873551	10.41627331	3.364560713	4.93E-11	8.35E-10	Solyc08g075020_3	8	59297709	59302655	+	1636	protein_coding	NA && sp|Q6DBP4|PAE8_ARATH Pectin acetylesterase 8 OS=Arabidopsis thaliana OX=3702 GN=PAE8 PE=2 SV=1 && PF03283:Pectinacetylesterase	bHLH
Solyc05g013370_1	85.98618703	118.3509261	79.66971559	10.26346202	4.505128419	11.46853061	94.6689429	8.745707016	3.425454868	4.99E-11	8.44E-10	Solyc05g013370_1	5	6447494	6448192	+	699	protein_coding	NA && - && PF00319:SRF-type transcription factor (DNA-binding and dimerisation domain)	M-type_MADS
Solyc07g014680_3	103.1834244	69.27859087	150.2343208	13.19587974	12.01367578	4.459984124	107.5654454	9.889846551	3.458604185	5.13E-11	8.67E-10	Solyc07g014680_3	7	5092123	5098407	+	2126	protein_coding	NA && sp|Q6H501|HKT6_ORYSJ Probable cation transporter HKT6 OS=Oryza sativa subsp. japonica OX=39947 GN=HKT6 PE=2 SV=2 && PF02386:Cation transport protein	-
Solyc05g043430_3	91.7185995	154.4335255	124.0571286	392.9439746	334.8812125	339.595934	123.4030845	355.8070404	-1.52766455	5.38E-11	9.09E-10	Solyc05g043430_3	5	57227057	57230318	-	696	protein_coding	NA && sp|O67802|DLHH_AQUAE Putative carboxymethylenebutenolidase OS=Aquifex aeolicus (strain VF5) OX=224324 GN=aq_1997 PE=3 SV=1 && PF01738:Dienelactone hydrolase family	-
Solyc11g008810_2	190.6027146	134.2272698	212.8319545	40.32074366	29.28333472	45.87412242	179.2206463	38.4927336	2.217875259	5.72E-11	9.64E-10	Solyc11g008810_2	11	2995238	3004151	+	3166	protein_coding	NA && sp|Q8L7S6|HEXO3_ARATH Beta-hexosaminidase 3 OS=Arabidopsis thaliana OX=3702 GN=HEXO3 PE=1 SV=1 && PF00759:Glycosyl hydrolase family 9	FAR1
Solyc12g088750_2	63.05653716	63.50537496	36.42044141	188.4078386	207.2359073	334.4988093	54.32745118	243.3808517	-2.174560059	5.85E-11	9.84E-10	Solyc12g088750_2	12	64983438	64989080	+	3898	protein_coding	NA && sp|Q3EDL4|Y1154_ARATH Probable serine/threonine-protein kinase At1g01540 OS=Arabidopsis thaliana OX=3702 GN=At1g01540 PE=1 SV=2 && PF00069:Protein kinase domain	bHLH
Solyc02g094270_2	5.732412469	24.5361676	13.65766553	134.8912152	124.6418863	122.3309931	14.64208187	127.2880315	-3.124089896	5.93E-11	9.97E-10	Solyc02g094270_2	2	55484973	55487767	-	716	protein_coding	NA && sp|Q9FYA2|WRK75_ARATH Probable WRKY transcription factor 75 OS=Arabidopsis thaliana OX=3702 GN=WRKY75 PE=1 SV=1 && PF03106:WRKY DNA -binding domain	WRKY
Solyc07g063050_1	206.3668489	261.2380197	146.8199044	489.7137594	534.6085724	520.5438614	204.8082577	514.9553977	-1.336516274	6.15E-11	1.03E-09	Solyc07g063050_1	7	65770193	65771026	+	834	protein_coding	NA && - && -	-
Solyc12g049420_2	318.148892	269.8978436	343.7179158	48.38489239	72.83290944	119.1452902	310.5882171	80.12103067	1.951190702	6.21E-11	1.04E-09	Solyc12g049420_2	12	61932281	61938248	-	1177	protein_coding	NA && sp|Q94AU2|SEC22_ARATH 25.3 kDa vesicle transport protein OS=Arabidopsis thaliana OX=3702 GN=SEC22 PE=2 SV=1 && PF13774:Regulated-SNARE-like domain|PF00957:Synaptobrevin	Dof
Solyc05g051660_1	382.6385323	451.7541446	437.0452969	169.3471234	205.7341978	153.550882	423.8126579	176.2107344	1.26801864	6.23E-11	1.04E-09	Solyc05g051660_1	5	62899479	62900447	+	969	protein_coding	NA && sp|A0A2P1GIY2|HL3_CATRO Hydrolase 3 OS=Catharanthus roseus OX=4058 GN=HL3 PE=1 SV=1 && PF07859:alpha/beta hydrolase fold	NAC
Solyc09g075810_3	229.2964987	193.4027328	184.3784847	44.71937024	55.5632505	61.80263715	202.3592387	54.0284193	1.902193396	6.30E-11	1.06E-09	Solyc09g075810_3	9	67853400	67857071	-	1754	protein_coding	NA && sp|P80728|MAVI_CUCPE Mavicyanin OS=Cucurbita pepo OX=3663 PE=1 SV=1 && PF02298:Plastocyanin-like domain	MYB
Solyc02g077060_2	156.2082398	186.186213	170.7208191	39.58763923	42.79871998	20.38849885	171.0384239	34.25828602	2.326033769	7.07E-11	1.18E-09	Solyc02g077060_2	2	42690055	42690534	+	480	protein_coding	NA && - && PF05659:Arabidopsis broad-spectrum mildew resistance protein RPW8	C2H2
Solyc01g067120_3	93.15170262	98.1446704	38.696719	5.864835442	1.501709473	2.548562357	76.664364	3.305035757	4.536430201	7.29E-11	1.22E-09	Solyc01g067120_3	1	75298436	75300535	-	809	protein_coding	NA && sp|Q94AH6|CUL1_ARATH Cullin-1 OS=Arabidopsis thaliana OX=3702 GN=CUL1 PE=1 SV=1 && PF00888:Cullin family	TCP
Solyc11g072030_2	84.55308391	51.95894315	38.696719	0	0	0	58.40291535	0	8.8120564	7.48E-11	1.25E-09	Solyc11g072030_2	11	55614771	55617822	-	922	protein_coding	NA && - && PF14368:Probable lipid transfer	-
Solyc09g008780_3	84.55308391	92.37145449	71.70274403	0	0	1.274281178	82.87576081	0.424760393	7.479896267	7.76E-11	1.29E-09	Solyc09g008780_3	9	2206586	2211433	+	2405	protein_coding	NA && sp|Q8S9J0|TAUE4_ARATH Sulfite exporter TauE/SafE family protein 4 OS=Arabidopsis thaliana OX=3702 GN=At2g36630 PE=2 SV=1 && PF01925:Sulfite exporter TauE/SafE	C2H2
Solyc04g077810_1	10.03172182	5.773215906	2.276277588	135.6243196	51.05812208	135.0738049	6.027071771	107.2520822	-4.192867567	8.08E-11	1.34E-09	Solyc04g077810_1	4	62787495	62788235	+	741	protein_coding	NA && - && -	-
Solyc01g065980_3	427.0647289	321.8567867	239.0091468	826.2086929	714.0628544	716.1460222	329.3102208	752.1391898	-1.196058609	8.18E-11	1.36E-09	Solyc01g065980_3	1	72593184	72602924	-	1291	protein_coding	NA && sp|P42736|RAP23_ARATH Ethylene-responsive transcription factor RAP2-3 OS=Arabidopsis thaliana OX=3702 GN=RAP2-3 PE=1 SV=2 && PF00847:AP2 domain	ERF
Solyc03g031630_3	0	0	0	88.70563606	69.07863576	84.10255777	0	80.6289432	-8.364369919	8.63E-11	1.43E-09	Solyc03g031630_3	3	4128340	4129222	+	661	protein_coding	NA && - && PF13499:EF-hand domain pair	-
Solyc02g077040_3	161.9406522	168.8665652	193.483595	4.398626581	16.5188042	36.95415417	174.7636042	19.29052832	3.167910328	8.75E-11	1.45E-09	Solyc02g077040_3	2	42680237	42687280	+	2536	protein_coding	NA && sp|Q7XWK5|SAG39_ORYSJ Senescence-specific cysteine protease SAG39 OS=Oryza sativa subsp. japonica OX=39947 GN=SAG39 PE=2 SV=2 && PF08246:Cathepsin propeptide inhibitor domain (I29)|PF00112:Papain family cysteine protease	BBR-BPC
Solyc11g005770_2	111.7820431	127.0107499	35.28230262	357.7549619	420.4786524	369.5415417	91.35836523	382.5917187	-2.078522672	8.91E-11	1.48E-09	Solyc11g005770_2	11	604752	607515	-	2200	protein_coding	NA && sp|Q9LXD9|PME51_ARATH Probable pectinesterase/pectinesterase inhibitor 51 OS=Arabidopsis thaliana OX=3702 GN=PME51 PE=2 SV=1 && PF04043:Plant invertase/pectin methylesterase inhibitor|PF01095:Pectinesterase	NAC
Solyc06g061170_3	364.0081918	366.59921	483.7089875	167.8809145	165.188042	168.2051155	404.7721298	167.0913574	1.278919517	9.20E-11	1.52E-09	Solyc06g061170_3	6	39291655	39297319	+	2717	protein_coding	NA && sp|Q93XM7|MCAT_ARATH Mitochondrial carnitine/acylcarnitine carrier-like protein OS=Arabidopsis thaliana OX=3702 GN=BOU PE=1 SV=1 && PF00153:Mitochondrial carrier protein	ERF
Solyc08g067770_3	427.0647289	513.8162156	456.3936565	209.667867	158.4303494	222.3620656	465.7582003	196.820094	1.240971702	9.25E-11	1.53E-09	Solyc08g067770_3	8	56856543	56864510	+	2336	protein_coding	NA && sp|Q9LN71|RING1_ARATH E3 ubiquitin-protein ligase At1g12760 OS=Arabidopsis thaliana OX=3702 GN=At1g12760 PE=1 SV=1 && PF13639:Ring finger domain	G2-like
novel.260	189.1696115	230.9286362	178.6877907	35.18901265	58.56666945	19.75135826	199.5953461	37.83568012	2.405207125	9.30E-11	1.54E-09	-	10	50269531	50271631	-	1443	-	- && - && -	-
Solyc03g093800_1	348.2440575	417.1148492	286.8109761	139.2898417	66.82607155	52.24552831	350.7232943	86.12048054	2.027401815	9.54E-11	1.58E-09	Solyc03g093800_1	3	56913720	56914145	-	426	protein_coding	NA && - && -	-
Solyc07g049730_3	404.135079	440.2077128	503.057347	171.5464367	183.9594104	221.724925	449.1333796	192.4102574	1.222986738	9.93E-11	1.64E-09	Solyc07g049730_3	7	60202265	60206215	-	1209	protein_coding	NA && - && PF06364:Protein of unknown function (DUF1068)	SBP
Solyc02g082650_3	93.15170262	28.86607953	84.22227077	1.46620886	0	1.911421768	68.7466843	1.125876876	5.894260252	9.95E-11	1.64E-09	Solyc02g082650_3	2	46852760	46856467	+	1512	protein_coding	NA && sp|Q7X911|SAC6_ARATH Phosphoinositide phosphatase SAC6 OS=Arabidopsis thaliana OX=3702 GN=SAC6 PE=2 SV=1 && -	-
Solyc11g012930_2	326.7475107	395.4652895	344.8560546	143.6884683	103.6179536	149.7280385	355.6896183	132.3448201	1.424241098	1.04E-10	1.71E-09	Solyc11g012930_2	11	5776936	5780201	+	1322	protein_coding	NA && sp|Q501F8|WTR32_ARATH WAT1-related protein At4g08300 OS=Arabidopsis thaliana OX=3702 GN=At4g08300 PE=2 SV=1 && PF00892:EamA-like transporter family	ERF
Solyc09g097760_3	57.32412469	151.5469175	109.2613242	322.5659493	393.4478819	395.6643059	106.0441221	370.559379	-1.804821592	1.04E-10	1.71E-09	Solyc09g097760_3	9	72285937	72286986	-	933	protein_coding	NA && - && PF07172:Glycine rich protein family	-
Solyc06g082480_3	108.9158369	85.15493461	93.32738112	318.9004271	253.7889009	281.6161404	95.79938421	284.7684895	-1.57243477	1.05E-10	1.73E-09	Solyc06g082480_3	6	48308783	48326129	-	5287	protein_coding	NA && sp|Q9LVL5|WNK4_ARATH Probable serine/threonine-protein kinase WNK4 OS=Arabidopsis thaliana OX=3702 GN=WNK4 PE=1 SV=1 && -	MYB_related
Solyc02g083630_3	100.3172182	157.3201334	68.28832765	11.72967088	15.01709473	10.19424943	108.6418931	12.31367168	3.141984054	1.08E-10	1.78E-09	Solyc02g083630_3	2	47523687	47527124	+	2225	protein_coding	NA && sp|Q9SD20|MS5L2_ARATH Protein POLLENLESS 3-LIKE 2 OS=Arabidopsis thaliana OX=3702 GN=At3g51280 PE=2 SV=1 && PF00141:Peroxidase	MYB_related
Solyc09g074780_3	5.732412469	0	0	90.17184492	72.08205471	116.5967278	1.910804156	92.95020915	-5.695373723	1.11E-10	1.81E-09	Solyc09g074780_3	9	67013668	67017608	+	1948	protein_coding	NA && sp|Q9FFH3|IDD8_ARATH Zinc finger protein NUTCRACKER OS=Arabidopsis thaliana OX=3702 GN=NUC PE=1 SV=1 && -	C2H2
Solyc11g069540_2	88.85239326	118.3509261	121.780851	8.797253163	20.27307789	6.371405892	109.6613901	11.81391231	3.226945371	1.13E-10	1.84E-09	Solyc11g069540_2	11	54453483	54457620	-	1165	protein_coding	NA && sp|F4IHS9|UXT1_ARATH UDP-xylose transporter 1 OS=Arabidopsis thaliana OX=3702 GN=UXT1 PE=1 SV=1 && PF03151:Triose-phosphate Transporter family	NAC
Solyc12g099200_2	571.8081437	375.2590339	306.1593356	903.9177625	907.0325217	975.462242	417.7421711	928.8041754	-1.156599651	1.17E-10	1.92E-09	Solyc12g099200_2	12	67415386	67416878	+	598	protein_coding	NA && sp|F4HWQ8|CVIF1_ARATH Cell wall / vacuolar inhibitor of fructosidase 1 OS=Arabidopsis thaliana OX=3702 GN=C/VIF1 PE=1 SV=1 && PF04043:Plant invertase/pectin methylesterase inhibitor	LSD
Solyc06g054625_1	2.866206234	0	9.105110353	85.77321834	109.6247915	82.82827659	3.990438862	92.74209549	-4.448696068	1.20E-10	1.97E-09	Solyc06g054625_1	6	37451998	37454989	-	645	protein_coding	NA && sp|Q6NPN3|C3H58_ARATH Zinc finger CCCH domain-containing protein 58 OS=Arabidopsis thaliana OX=3702 GN=At5g18550 PE=2 SV=1 && PF00642:Zinc finger C-x8-C-x5-C-x3-H type (and similar)	C3H
Solyc03g114970_3	245.060633	268.4545396	343.7179158	98.23599365	105.8705178	87.28826072	285.7443628	97.13159074	1.560495904	1.25E-10	2.03E-09	Solyc03g114970_3	3	66317310	66320228	-	1025	protein_coding	NA && sp|B3H4F1|SP1L1_ARATH Protein SPIRAL1-like 1 OS=Arabidopsis thaliana OX=3702 GN=SP1L1 PE=2 SV=1 && -	-
Solyc03g093410_3	207.799952	288.6607953	282.2584209	525.6358765	587.9192587	575.9750926	259.5730561	563.1767426	-1.115542522	1.25E-10	2.04E-09	Solyc03g093410_3	3	56123218	56131528	+	3230	protein_coding	NA && sp|Q07423|HEX6_RICCO Hexose carrier protein HEX6 OS=Ricinus communis OX=3988 GN=HEX6 PE=2 SV=1 && PF00083:Sugar (and other) transporter	ERF
Solyc10g045240_2	266.5571798	295.8773152	377.8620797	1.46620886	4.505128419	16.56565532	313.4321915	7.512330866	5.368668085	1.29E-10	2.10E-09	Solyc10g045240_2	10	32254704	32259933	+	1752	protein_coding	NA && sp|A2SY66|VICHY_VICSN Vicianin hydrolase (Fragment) OS=Vicia sativa subsp. nigra OX=3909 PE=1 SV=1 && PF00232:Glycosyl hydrolase family 1	EIL
Solyc02g086970_3	113.2151463	128.4540539	250.3905347	21.26002848	36.04102735	22.93706121	164.0199116	26.74603901	2.623402091	1.36E-10	2.21E-09	Solyc02g086970_3	2	50173132	50178076	-	2472	protein_coding	NA && sp|C7A2A0|BALDH_ANTMA Benzaldehyde dehydrogenase, mitochondrial OS=Antirrhinum majus OX=4151 GN=BALDH PE=1 SV=1 && PF00171:Aldehyde dehydrogenase family	bHLH
Solyc09g010850_3	610.5019279	542.6822951	531.5108169	269.7824303	303.3453136	264.4133445	561.5650133	279.1803628	1.008140124	1.39E-10	2.26E-09	Solyc09g010850_3	9	4169021	4172722	+	2244	protein_coding	NA && sp|Q65XV8|RK176_ORYSJ Receptor-like cytoplasmic kinase 176 OS=Oryza sativa subsp. japonica OX=39947 GN=RLCK176 PE=1 SV=1 && PF07714:Protein tyrosine kinase	Whirly
Solyc09g092470_2	96.01790885	86.59823858	59.1832173	0	0	1.274281178	80.59978824	0.424760393	7.439822854	1.39E-10	2.26E-09	Solyc09g092470_2	9	72030538	72033398	-	1874	protein_coding	NA && sp|Q9FQ27|TPSGB_SOLHA (E,E)-germacrene B synthase OS=Solanum habrochaites OX=62890 GN=SSTLH1 PE=1 SV=1 && PF01397:Terpene synthase, N-terminal domain|PF03936:Terpene synthase family, metal binding domain	GRAS
Solyc08g068350_3	310.9833764	300.2072271	281.1202822	119.4960221	54.06154103	82.19113601	297.4369619	85.24956639	1.802057038	1.45E-10	2.35E-09	Solyc08g068350_3	8	57507197	57514137	-	1605	protein_coding	NA && - && -	-
Solyc06g053710_3	189.1696115	144.3303976	314.1263072	565.2235157	554.8816503	677.2804463	215.8754388	599.1285374	-1.465357538	1.62E-10	2.62E-09	Solyc06g053710_3	6	36644373	36647976	-	3048	protein_coding	NA && sp|Q0WPQ2|ETR2_ARATH Ethylene receptor 2 OS=Arabidopsis thaliana OX=3702 GN=ETR2 PE=1 SV=2 && PF00512:His Kinase A (phospho-acceptor) domain|PF02518:Histidine kinase-, DNA gyrase B-, and HSP90-like ATPase|PF00072:Response regulator receiver domain|PF01590:GAF domain	Trihelix
Solyc02g082660_3	224.9971894	170.3098692	103.5706303	38.8545348	27.03077051	22.93706121	166.292563	29.60745551	2.489311419	1.64E-10	2.66E-09	Solyc02g082660_3	2	46856963	46870590	+	5200	protein_coding	NA && sp|F4JN26|MLH3_ARATH DNA mismatch repair protein MLH3 OS=Arabidopsis thaliana OX=3702 GN=MLH3 PE=2 SV=2 && PF08676:MutL C terminal dimerisation domain|PF13589:Histidine kinase-, DNA gyrase B-, and HSP90-like ATPase|PF01119:DNA mismatch repair protein, C-terminal domain	C3H
Solyc12g035225_1	98.88411508	25.97947158	50.07810694	0	0	0	58.31389787	0	8.811536624	1.69E-10	2.72E-09	Solyc12g035225_1	12	39430379	39433164	+	1361	protein_coding	NA && sp|P08770|TRA1_MAIZE Putative AC transposase OS=Zea mays OX=4577 PE=2 SV=2 && PF14372:Domain of unknown function (DUF4413)|PF05699:hAT family C-terminal dimerisation region	bHLH
Solyc08g079660_3	200.6344364	251.1348919	162.7538476	59.38145885	57.06495997	40.77699771	204.8410586	52.40780551	1.967309919	1.80E-10	2.89E-09	Solyc08g079660_3	8	63269292	63272817	-	1108	protein_coding	NA && sp|Q8GW78|CLPT2_ARATH ATP-dependent Clp protease ATP-binding subunit CLPT2, chloroplastic OS=Arabidopsis thaliana OX=3702 GN=CLPT2 PE=1 SV=1 && PF02861:Clp amino terminal domain, pathogenicity island component	ARF
Solyc01g097240_3	14.33103117	14.43303976	36.42044141	176.6781677	106.6213726	189.230755	21.72817078	157.5100984	-2.83211916	1.81E-10	2.91E-09	Solyc01g097240_3	1	88037596	88038180	-	475	protein_coding	NA && sp|P32045|PRP2_SOLLC Pathogenesis-related protein P2 OS=Solanum lycopersicum OX=4081 PE=2 SV=1 && PF00967:Barwin family	-
Solyc12g056250_2	332.4799232	314.6402669	415.4206599	157.6174525	121.6384673	101.3053537	354.1802833	126.8537578	1.484964143	1.81E-10	2.92E-09	Solyc12g056250_2	12	63158732	63161239	-	1081	protein_coding	NA && sp|Q9ZRT5|GSTT1_ARATH Glutathione S-transferase T1 OS=Arabidopsis thaliana OX=3702 GN=GSTT1 PE=2 SV=1 && PF02798:Glutathione S-transferase, N-terminal domain	-
Solyc06g069420_3	174.8385803	137.1138778	204.8649829	23.45934177	6.006837892	36.95415417	172.2724803	22.14011128	2.951079638	1.91E-10	3.07E-09	Solyc06g069420_3	6	43287141	43288920	-	1363	protein_coding	NA && - && PF00582:Universal stress protein family	-
Solyc12g006470_2	111.7820431	64.94867894	95.60365871	13.19587974	4.505128419	5.097124714	90.77812693	7.599377626	3.584925966	1.94E-10	3.11E-09	Solyc12g006470_2	12	956592	962771	+	1743	protein_coding	NA && sp|Q84P53|GATP2_SOLLC Gamma aminobutyrate transaminase 2 OS=Solanum lycopersicum OX=4081 GN=GABA-TP2 PE=1 SV=1 && PF00202:Aminotransferase class-III	ERF
Solyc06g075250_3	371.1737073	505.1563917	360.7899977	76.97596517	171.1948799	135.7109455	412.3733656	127.9605969	1.687329025	1.95E-10	3.12E-09	Solyc06g075250_3	6	46833208	46836044	-	2571	protein_coding	NA && sp|Q944L3|IDD9_ARATH Zinc finger protein BALDIBIS OS=Arabidopsis thaliana OX=3702 GN=BIB PE=1 SV=1 && -	C2H2
Solyc09g009840_1	74.52136209	46.18572725	71.70274403	253.6541329	208.7376168	226.8220498	64.13661112	229.7379331	-1.836628713	1.96E-10	3.14E-09	Solyc09g009840_1	9	3333021	3333887	-	867	protein_coding	NA && - && -	-
Solyc04g014570_3	583.2729687	587.4247184	685.1595541	271.9817436	300.3418946	346.6044805	618.6190804	306.3093729	1.014331768	1.98E-10	3.16E-09	Solyc04g014570_3	4	4833026	4838070	-	2211	protein_coding	NA && sp|Q9ZPS7|TMN3_ARATH Transmembrane 9 superfamily member 3 OS=Arabidopsis thaliana OX=3702 GN=TMN3 PE=2 SV=1 && PF02990:Endomembrane protein 70	FAR1
Solyc07g049180_3	470.0578224	470.5170963	678.3307213	216.9989113	171.1948799	260.590501	539.6352133	216.2614307	1.319802142	2.02E-10	3.23E-09	Solyc07g049180_3	7	59564864	59575376	-	2708	protein_coding	NA && sp|A0A0P0XII1|CERK1_ORYSJ Chitin elicitor receptor kinase 1 OS=Oryza sativa subsp. japonica OX=39947 GN=CERK1 PE=1 SV=1 && PF00069:Protein kinase domain	GRAS
Solyc02g093580_3	51.59171222	54.8455511	78.5315768	195.0057784	240.2735157	240.2020021	61.65628004	225.1604321	-1.859723531	2.07E-10	3.30E-09	Solyc02g093580_3	2	55030013	55031984	-	1480	protein_coding	NA && sp|P24396|PLY18_SOLLC Probable pectate lyase P18 OS=Solanum lycopersicum OX=4081 GN=9612 PE=2 SV=1 && PF00544:Pectate lyase	AP2
Solyc11g068940_1	169.1061678	194.8460368	196.8980114	37.38832594	59.31752418	26.75990475	186.950072	41.15525162	2.189395709	2.10E-10	3.35E-09	Solyc11g068940_1	11	53787417	53788688	-	1272	protein_coding	NA && sp|Q9SF15|PUB24_ARATH E3 ubiquitin-protein ligase PUB24 OS=Arabidopsis thaliana OX=3702 GN=PUB24 PE=1 SV=1 && PF04564:U-box domain	Dof
Solyc02g084740_3	128.9792805	167.4232613	143.4054881	4.398626581	30.03418946	16.56565532	146.6026766	16.99949045	3.110549502	2.14E-10	3.41E-09	Solyc02g084740_3	2	48479752	48485938	-	2001	protein_coding	NA && sp|Q9M066|C90C1_ARATH 3-epi-6-deoxocathasterone 23-monooxygenase CYP90C1 OS=Arabidopsis thaliana OX=3702 GN=CYP90C1 PE=1 SV=3 && PF00067:Cytochrome P450	FAR1
Solyc09g098300_3	435.6633476	544.1255991	570.2075359	216.9989113	154.6760757	254.8562357	516.6654942	208.8437409	1.305819138	2.22E-10	3.54E-09	Solyc09g098300_3	9	72668610	72670282	-	652	protein_coding	NA && - && -	-
Solyc07g009080_3	601.9033092	430.104585	402.9011331	1073.99799	818.4316628	1016.87638	478.3030091	969.7686778	-1.022272863	2.23E-10	3.55E-09	Solyc07g009080_3	7	4037471	4038069	-	366	protein_coding	NA && - && -	-
Solyc01g080910_2	12.89792805	57.73215906	47.80182935	280.0458923	262.048303	156.0994444	39.47730549	232.7312132	-2.553492157	2.36E-10	3.74E-09	Solyc01g080910_2	1	80103755	80105029	+	1275	protein_coding	NA && - && -	-
Solyc07g062080_3	695.0550118	642.2702695	475.742016	292.5086677	289.0790736	222.3620656	604.3557658	267.9832689	1.172464643	2.58E-10	4.10E-09	Solyc07g062080_3	7	65036414	65042208	+	2777	protein_coding	NA && sp|Q9LUC3|MPK19_ARATH Mitogen-activated protein kinase 19 OS=Arabidopsis thaliana OX=3702 GN=MPK19 PE=1 SV=2 && PF00069:Protein kinase domain	HB-other
Solyc12g096150_2	510.1847097	484.9501361	481.4327099	260.9851772	225.256421	233.1934556	492.1891852	239.8116846	1.03715373	2.62E-10	4.15E-09	Solyc12g096150_2	12	66164180	66167024	+	1085	protein_coding	NA && sp|P41127|RL131_ARATH 60S ribosomal protein L13-1 OS=Arabidopsis thaliana OX=3702 GN=RPL13B PE=1 SV=1 && PF01294:Ribosomal protein L13e	-
Solyc02g079170_3	331.0468201	203.5058607	165.0301252	27.85796835	46.55299366	68.17404304	233.1942686	47.52833502	2.288400087	2.66E-10	4.22E-09	Solyc02g079170_3	2	44337085	44343054	+	2276	protein_coding	NA && sp|Q94BV7|NDB2_ARATH External alternative NAD(P)H-ubiquinone oxidoreductase B2, mitochondrial OS=Arabidopsis thaliana OX=3702 GN=NDB2 PE=1 SV=1 && PF00036:EF hand|PF07992:Pyridine nucleotide-disulphide oxidoreductase	-
Solyc01g016470_3	353.9764699	287.2174913	264.0482002	115.8305	91.60427785	115.9595872	301.7473872	107.7981217	1.482403873	2.68E-10	4.25E-09	Solyc01g016470_3	1	20052680	20053774	-	822	protein_coding	NA && sp|Q8LEQ0|RLA13_ARATH 60S acidic ribosomal protein P1-3 OS=Arabidopsis thaliana OX=3702 GN=RPP1C PE=1 SV=2 && PF00428:60s Acidic ribosomal protein	-
Solyc10g050960_2	53.02481534	67.83528689	35.28230262	0	0	0	52.04746828	0	8.645793452	2.69E-10	4.25E-09	Solyc10g050960_2	10	51184351	51184703	-	295	protein_coding	NA && - && -	ERF
Solyc02g088390_3	243.6275299	132.7839658	207.1412605	47.65178796	33.78846314	52.24552831	194.5175854	44.56192647	2.124115993	2.71E-10	4.28E-09	Solyc02g088390_3	2	51122717	51125123	-	609	protein_coding	NA && sp|Q39131|LAML_ARATH Lamin-like protein OS=Arabidopsis thaliana OX=3702 GN=At5g15350 PE=2 SV=1 && PF02298:Plastocyanin-like domain	-
Solyc03g065250_3	0	2.886607953	6.828832765	71.11112973	105.8705178	79.00543306	3.238480239	85.32902688	-4.638130647	2.74E-10	4.33E-09	Solyc03g065250_3	3	43244895	43248257	-	2069	protein_coding	NA && sp|F4HVY0|CER1_ARATH Very-long-chain aldehyde decarbonylase CER1 OS=Arabidopsis thaliana OX=3702 GN=CER1 PE=1 SV=1 && PF04116:Fatty acid hydroxylase superfamily|PF12076:WAX2 C-terminal domain	C3H
Solyc07g045340_3	379.772326	409.8983293	226.48962	132.6919019	83.34487575	73.27116776	338.7200918	96.43598179	1.811678621	2.82E-10	4.44E-09	Solyc07g045340_3	7	58569637	58573685	-	784	protein_coding	NA && sp|O22633|NOI4_ARATH Protein NOI4 OS=Arabidopsis thaliana OX=3702 GN=NOI4 PE=1 SV=1 && -	GATA
Solyc12g088130_2	0	0	0	104.8339335	69.07863576	51.60838772	0	75.17365234	-8.262342301	2.88E-10	4.53E-09	Solyc12g088130_2	12	64571291	64573794	-	1729	protein_coding	NA && sp|Q9LSL1|BH093_ARATH Transcription factor bHLH93 OS=Arabidopsis thaliana OX=3702 GN=BHLH93 PE=1 SV=1 && PF00010:Helix-loop-helix DNA-binding domain	bHLH
Solyc05g009330_3	422.7654196	248.2482839	305.0211968	126.093962	90.10256838	103.853916	325.3449668	106.6834821	1.608095156	2.96E-10	4.66E-09	Solyc05g009330_3	5	3477341	3482510	-	944	protein_coding	NA && - && PF06749:Protein of unknown function (DUF1218)	ERF
Solyc05g052470_3	160.5075491	141.4437897	220.7989261	456.72406	467.7825008	388.6557594	174.2500883	437.7207734	-1.321920351	2.97E-10	4.66E-09	Solyc05g052470_3	5	63536338	63540146	+	1639	protein_coding	NA && sp|Q8H1T3|FRI2_TOBAC Ferritin-2, chloroplastic OS=Nicotiana tabacum OX=4097 GN=FER2 PE=2 SV=1 && PF00210:Ferritin-like domain	B3
Solyc10g024490_2	332.4799232	385.3621617	400.6248555	120.2291266	163.6863326	75.18258952	372.8223135	119.6993495	1.643060443	3.05E-10	4.79E-09	Solyc10g024490_2	10	14851859	14855783	-	2833	protein_coding	NA && sp|Q9LQL2|PTR14_ARATH Protein NRT1/ PTR FAMILY 7.3 OS=Arabidopsis thaliana OX=3702 GN=NPF7.3 PE=1 SV=2 && PF00854:POT family	G2-like
Solyc01g081440_3	143.3103117	191.9594289	191.2073174	445.7274936	398.7038651	398.8500088	175.4923527	414.4271225	-1.237274136	3.35E-10	5.26E-09	Solyc01g081440_3	1	80500439	80505752	-	2795	protein_coding	NA && - && PF06219:Protein of unknown function (DUF1005)	M-type_MADS
Solyc07g039410_3	111.7820431	121.237534	54.63066212	4.398626581	0	10.19424943	95.88341309	4.864292003	4.268484345	3.40E-10	5.33E-09	Solyc07g039410_3	7	47548630	47549939	-	1055	protein_coding	NA && sp|Q9STE7|R13L3_ARATH Putative disease resistance RPP13-like protein 3 OS=Arabidopsis thaliana OX=3702 GN=RPP13L3 PE=3 SV=1 && -	WRKY
Solyc02g069910_2	568.9419375	482.0635281	385.8290512	113.6311867	217.7478736	180.9479273	478.9448389	170.7756625	1.486232353	3.43E-10	5.38E-09	Solyc02g069910_2	2	40265236	40265556	-	321	protein_coding	NA && - && -	-
Solyc10g080670_2	80.25377456	79.3817187	93.32738112	278.5796835	227.5089852	258.6790792	84.32095813	254.9225826	-1.592729818	3.45E-10	5.39E-09	Solyc10g080670_2	10	62015616	62017764	+	1174	protein_coding	NA && - && -	-
Solyc06g065570_3	194.9020239	178.9696931	231.0421752	406.8729588	500.8201093	466.3869113	201.6379641	458.0266598	-1.179873857	3.76E-10	5.87E-09	Solyc06g065570_3	6	41078069	41092840	-	3270	protein_coding	NA && sp|Q9LK34|UKL2_ARATH Uridine kinase-like protein 2, chloroplastic OS=Arabidopsis thaliana OX=3702 GN=UKL2 PE=2 SV=1 && PF14681:Uracil phosphoribosyltransferase|PF00583:Acetyltransferase (GNAT) family|PF00485:Phosphoribulokinase / Uridine kinase family	-
Solyc12g006560_2	0	0	2.276277588	105.567038	118.6350484	106.4024784	0.758759196	110.2015216	-6.983334849	3.78E-10	5.89E-09	Solyc12g006560_2	12	1064894	1066461	+	454	protein_coding	NA && sp|Q02921|NO93_SOYBN Early nodulin-93 OS=Glycine max OX=3847 PE=2 SV=1 && -	-
Solyc02g091733_1	160.5075491	190.5161249	200.3124278	45.45247467	21.02393262	50.33410655	183.7787006	38.93683795	2.23495663	3.89E-10	6.06E-09	Solyc02g091733_1	2	53615156	53615579	+	255	protein_coding	NA && - && -	-
Solyc07g006480_3	74.52136209	98.1446704	63.73577247	0.73310443	7.508547365	0	78.80060165	2.747217265	4.882607912	3.94E-10	6.12E-09	Solyc07g006480_3	7	1253877	1261329	-	3670	protein_coding	NA && sp|O04567|Y1719_ARATH Probable inactive receptor kinase At1g27190 OS=Arabidopsis thaliana OX=3702 GN=At1g27190 PE=1 SV=1 && PF14543:Xylanase inhibitor N-terminal|PF14541:Xylanase inhibitor C-terminal	WRKY
Solyc06g035760_3	163.3737554	131.3406619	104.7087691	385.6129303	305.5978778	388.0186188	133.1410621	359.7431423	-1.439900548	4.23E-10	6.55E-09	Solyc06g035760_3	6	24998266	25000682	+	2324	protein_coding	NA && sp|Q9FXW4|C80B2_COPJA Probable (S)-N-methylcoclaurine 3'-hydroxylase isozyme 2 OS=Coptis japonica OX=3442 GN=CYP80B2 PE=2 SV=1 && PF00067:Cytochrome P450	MYB
Solyc05g007610_3	358.2757793	343.5063464	227.6277588	648.0643163	900.2748291	614.8406686	309.8032948	721.059938	-1.222556629	4.31E-10	6.68E-09	Solyc05g007610_3	5	2136081	2155547	+	10044	protein_coding	NA && sp|Q6L3N7|R1C3_SOLDE Putative late blight resistance protein homolog R1C-3 OS=Solanum demissum OX=50514 GN=R1C-3 PE=3 SV=1 && PF00931:NB-ARC domain|PF12061:Late blight resistance protein R1	bHLH
Solyc02g071250_3	259.3916642	303.093835	267.4626166	587.949753	563.8919071	510.3496119	276.649372	554.0637574	-1.002514873	4.79E-10	7.41E-09	Solyc02g071250_3	2	41291212	41300819	-	6127	protein_coding	NA && sp|Q54GB2|CTSL2_DICDI CTD small phosphatase-like protein 2 OS=Dictyostelium discoideum OX=44689 GN=ctdspl2 PE=3 SV=1 && PF03031:NLI interacting factor-like phosphatase	ERF
Solyc01g096200_3	309.5502733	415.6715452	406.3155495	97.50288922	172.6965894	80.27971424	377.1791227	116.8263976	1.694335964	4.81E-10	7.44E-09	Solyc01g096200_3	1	87169096	87176182	-	3245	protein_coding	NA && sp|Q9LM76|PUB44_ARATH U-box domain-containing protein 44 OS=Arabidopsis thaliana OX=3702 GN=PUB44 PE=1 SV=1 && PF04564:U-box domain|PF05659:Arabidopsis broad-spectrum mildew resistance protein RPW8	GeBP
Solyc07g055200_3	227.8633956	199.1759487	250.3905347	422.2681518	521.0931871	585.5322015	225.8099597	509.6311801	-1.172329247	4.87E-10	7.52E-09	Solyc07g055200_3	7	63442160	63446833	+	1572	protein_coding	NA && sp|Q39010|KSG6_ARATH Shaggy-related protein kinase zeta OS=Arabidopsis thaliana OX=3702 GN=ASK6 PE=1 SV=2 && PF00069:Protein kinase domain	C3H
Solyc03g020010_1	96.01790885	46.18572725	19.3483595	708.1788796	700.5474692	720.6060064	53.8506652	709.7774517	-3.726598767	5.11E-10	7.89E-09	Solyc03g020010_1	3	62686557	62687174	-	618	protein_coding	NA && sp|Q9LMU2|KTI5_ARATH Kunitz trypsin inhibitor 5 OS=Arabidopsis thaliana OX=3702 GN=KTI5 PE=2 SV=1 && PF00197:Trypsin and protease inhibitor	-
Solyc08g081010_3	197.7682302	155.8768295	233.3184528	426.6667784	468.5333556	464.4754895	195.6545041	453.2252078	-1.207098489	5.28E-10	8.14E-09	Solyc08g081010_3	8	64262128	64270158	-	2424	protein_coding	NA && sp|O22493|GSH1_SOLLC Glutamate--cysteine ligase, chloroplastic OS=Solanum lycopersicum OX=4081 GN=GSH1 PE=2 SV=1 && PF04107:Glutamate-cysteine ligase family 2(GCS2)	-
Solyc01g112140_3	164.8068585	265.5679317	212.8319545	53.51662341	65.32436208	63.71405892	214.4022482	60.85168147	1.816373773	5.35E-10	8.25E-09	Solyc01g112140_3	1	98139368	98142075	-	1311	protein_coding	NA && sp|Q9LMA1|FMO1_ARATH Probable flavin-containing monooxygenase 1 OS=Arabidopsis thaliana OX=3702 GN=FMO1 PE=2 SV=1 && PF00743:Flavin-binding monooxygenase-like	C2H2
Solyc03g083720_1	81.68687768	59.17546303	66.01205006	0	0	5.097124714	68.95813026	1.699041571	5.263147705	5.41E-10	8.34E-09	Solyc03g083720_1	3	55083696	55084325	-	630	protein_coding	NA && sp|Q9STY5|PMI11_ARATH Pectinesterase inhibitor 11 OS=Arabidopsis thaliana OX=3702 GN=PMEI11 PE=2 SV=1 && PF04043:Plant invertase/pectin methylesterase inhibitor	Trihelix
Solyc02g069730_3	113.2151463	101.0312783	152.5105984	26.39175949	9.010256838	7.008546481	122.252341	14.13685427	3.12138383	5.80E-10	8.93E-09	Solyc02g069730_3	2	40112584	40114695	+	1243	protein_coding	NA && sp|B9GIE4|CSPL5_POPTR CASP-like protein 1B2 OS=Populus trichocarpa OX=3694 GN=POPTRDRAFT_798217 PE=3 SV=3 && PF04535:Domain of unknown function (DUF588)	LSD
Solyc12g008700_2	717.9846617	659.5899172	501.9192082	318.9004271	287.5773641	201.9735668	626.497929	269.483786	1.217066065	5.86E-10	9.01E-09	Solyc12g008700_2	12	2069910	2071848	-	553	protein_coding	NA && sp|P49689|RS30_ARATH 40S ribosomal protein S30 OS=Arabidopsis thaliana OX=3702 GN=RPS30A PE=3 SV=3 && -	-
Solyc11g013760_2	273.7226954	316.0835708	327.7839727	100.4353069	129.1470147	122.3309931	305.863413	117.3044382	1.383301133	6.17E-10	9.48E-09	Solyc11g013760_2	11	7144112	7149987	+	2999	protein_coding	NA && - && -	WRKY
Solyc09g014530_3	445.6950694	454.6407526	547.44476	214.7995981	204.2324883	108.9510408	482.5935273	175.9943757	1.458959929	6.31E-10	9.68E-09	Solyc09g014530_3	9	6149435	6151345	-	962	protein_coding	NA && sp|Q9C7I3|ML168_ARATH MLP-like protein 168 OS=Arabidopsis thaliana OX=3702 GN=MLP168 PE=2 SV=1 && PF00407:Pathogenesis-related protein Bet v I family	-
Solyc01g006825_1	283.7544172	277.1143635	299.3305029	112.8980823	39.79530104	70.08546481	286.7330945	74.25961603	1.949146098	6.40E-10	9.81E-09	Solyc01g006825_1	1	1390401	1391912	+	1215	protein_coding	NA && sp|Q66GR0|FLA17_ARATH Fasciclin-like arabinogalactan protein 17 OS=Arabidopsis thaliana OX=3702 GN=FLA17 PE=2 SV=1 && PF02469:Fasciclin domain	-
Solyc01g109880_3	93.15170262	121.237534	80.80785438	263.1844904	355.1542904	266.3247663	98.39903034	294.887849	-1.588124626	6.42E-10	9.82E-09	Solyc01g109880_3	1	96638668	96639159	+	492	protein_coding	NA && sp|C0Z2L5|BZP44_ARATH bZIP transcription factor 44 OS=Arabidopsis thaliana OX=3702 GN=BZIP44 PE=1 SV=1 && PF00170:bZIP transcription factor	bZIP
Solyc05g006830_3	85.98618703	144.3303976	143.4054881	20.52692405	21.02393262	24.21134239	124.5740242	21.92073302	2.506339292	6.51E-10	9.96E-09	Solyc05g006830_3	5	1452279	1454580	-	2046	protein_coding	NA && sp|Q38879|TRXH2_ARATH Thioredoxin H2 OS=Arabidopsis thaliana OX=3702 GN=TRX2 PE=1 SV=2 && PF00085:Thioredoxin	bHLH
Solyc07g042510_3	346.8109544	242.475068	254.9430899	73.31044302	65.32436208	114.6853061	281.4097041	84.44003705	1.732097418	6.57E-10	1.00E-08	Solyc07g042510_3	7	55902573	55904337	-	991	protein_coding	NA && sp|Q94A20|LFG5_ARATH BI1-like protein OS=Arabidopsis thaliana OX=3702 GN=LFG5 PE=2 SV=1 && PF01027:Inhibitor of apoptosis-promoting Bax1	C2H2
Solyc02g092880_3	417.0330071	228.0420283	284.5346985	640.0001676	675.7692629	870.3340448	309.8699113	728.7011584	-1.235257592	6.58E-10	1.00E-08	Solyc02g092880_3	2	54471984	54473384	-	1096	protein_coding	NA && - && -	-
Solyc02g020890_3	197.7682302	353.6094742	307.2974744	64.51318986	110.3756463	64.35119951	286.2250596	79.74667854	1.8464856	6.61E-10	1.01E-08	Solyc02g020890_3	2	20765293	20770149	+	2645	protein_coding	NA && sp|Q5PPS7|TM53A_XENLA Transmembrane protein 53-A OS=Xenopus laevis OX=8355 GN=tmem53-a PE=2 SV=1 && PF05705:Eukaryotic protein of unknown function (DUF829)	-
Solyc06g062360_3	116.0813525	51.95894315	93.32738112	333.5625158	293.584202	256.7676574	87.12255892	294.6381251	-1.755278638	6.62E-10	1.01E-08	Solyc06g062360_3	6	39444214	39449456	-	1671	protein_coding	NA && sp|P93654|SYP22_ARATH Syntaxin-22 OS=Arabidopsis thaliana OX=3702 GN=SYP22 PE=1 SV=1 && PF05739:SNARE domain|PF14523:Syntaxin-like protein	Dof
Solyc05g053930_3	480.0895442	510.9296077	439.3215745	176.6781677	253.7889009	211.5306756	476.7802421	213.9992481	1.155132338	7.06E-10	1.08E-08	Solyc05g053930_3	5	64802341	64805624	+	1912	protein_coding	NA && sp|P43293|PBL11_ARATH Probable serine/threonine-protein kinase PBL11 OS=Arabidopsis thaliana OX=3702 GN=PBL11 PE=1 SV=2 && PF07714:Protein tyrosine kinase	bHLH
Solyc03g113470_2	279.4551078	404.1251134	234.4565916	693.516791	622.4585766	711.0488975	306.0122709	675.674755	-1.147261231	7.23E-10	1.10E-08	Solyc03g113470_2	3	65092163	65103913	+	4409	protein_coding	NA && sp|Q9SSG3|HIPL1_ARATH HIPL1 protein OS=Arabidopsis thaliana OX=3702 GN=HIPL1 PE=3 SV=2 && PF07995:Glucose / Sorbosone dehydrogenase	LBD
Solyc01g090480_3	182.0040959	115.4643181	88.77482594	374.6163638	411.4683956	342.1444964	128.7477466	376.0764186	-1.553074679	7.26E-10	1.10E-08	Solyc01g090480_3	1	84035061	84041717	-	2886	protein_coding	NA && - && PF00013:KH domain	GATA
Solyc02g087705_1	98.88411508	103.9178863	62.59763368	2.932417721	0	10.19424943	88.46654502	4.375555716	4.29889687	7.34E-10	1.11E-08	Solyc02g087705_1	2	50665740	50666328	+	237	protein_coding	NA && - && -	HD-ZIP
Solyc11g020890_2	374.0399136	445.9809287	358.5137202	169.3471234	174.1982989	179.6736462	392.8448541	174.4063561	1.169892625	7.50E-10	1.14E-08	Solyc11g020890_2	11	12898001	12900124	+	877	protein_coding	NA && sp|Q680P8|RS29_ARATH 40S ribosomal protein S29 OS=Arabidopsis thaliana OX=3702 GN=RPS29A PE=3 SV=2 && -	MYB_related
Solyc05g015840_3	206.3668489	346.3929543	121.780851	43.98626581	36.79188209	57.34265303	224.8468847	46.04026698	2.282021076	7.50E-10	1.14E-08	Solyc05g015840_3	5	12395136	12399001	+	1524	protein_coding	NA && sp|Q49I57|TGA1B_MAIZE Teosinte glume architecture 1 OS=Zea mays OX=4577 GN=TGA1 PE=3 SV=1 && PF03110:SBP domain	SBP
Solyc11g067000_2	87.41929015	95.25806244	89.91296474	10.26346202	6.006837892	0	90.86343911	5.423433305	4.090420103	7.53E-10	1.14E-08	Solyc11g067000_2	11	53062890	53072133	-	4548	protein_coding	NA && sp|Q2PCF1|PDR2_NICPL Pleiotropic drug resistance protein 2 OS=Nicotiana plumbaginifolia OX=4092 GN=PDR2 PE=2 SV=1 && PF00005:ABC transporter|PF01061:ABC-2 type transporter|PF08370:Plant PDR ABC transporter associated|PF14510:ABC-transporter N-terminal	MYB_related
Solyc02g081150_1	0	7.216519882	6.828832765	49.85110125	159.9320589	86.01397954	4.681784216	98.59904656	-4.368746969	7.56E-10	1.14E-08	Solyc02g081150_1	2	45767095	45768144	-	1050	protein_coding	NA && - && -	-
Solyc08g008277_1	63.05653716	70.72189484	73.97902162	0	0	1.274281178	69.25248454	0.424760393	7.22532035	7.68E-10	1.16E-08	Solyc08g008277_1	8	2697631	2699618	-	534	protein_coding	NA && - && -	WRKY
Solyc01g107990_3	54.45791845	27.42277555	63.73577247	0	0	0	48.53882216	0	8.549972195	7.90E-10	1.19E-08	Solyc01g107990_3	1	95269431	95274402	-	1970	protein_coding	NA && sp|Q93XX5|Y5713_ARATH PI-PLC X domain-containing protein At5g67130 OS=Arabidopsis thaliana OX=3702 GN=At5g67130 PE=1 SV=1 && -	bZIP
Solyc03g093510_2	305.250964	267.0112356	250.3905347	104.1008291	66.07521681	103.2167754	274.2175781	91.13094045	1.586472807	8.44E-10	1.28E-08	Solyc03g093510_2	3	56284768	56292157	+	1422	protein_coding	NA && sp|P53118|ROG1_YEAST Putative lipase ROG1 OS=Saccharomyces cerevisiae (strain ATCC 204508 / S288c) OX=559292 GN=ROG1 PE=1 SV=1 && PF05057:Putative serine esterase (DUF676)	Dof
Solyc05g008110_3	101.7503213	127.0107499	145.6817656	391.4777657	270.3077051	379.0986506	124.814279	346.9613738	-1.471275088	8.45E-10	1.28E-08	Solyc05g008110_3	5	2528513	2529379	-	867	protein_coding	NA && - && -	-
Solyc03g122250_3	272.2895923	339.1764345	276.567727	69.64492087	120.1367578	44.59984124	296.0112512	78.12717332	1.925557187	8.50E-10	1.28E-08	Solyc03g122250_3	3	71617008	71621115	-	1813	protein_coding	NA && sp|Q8NBN3|TM87A_HUMAN Transmembrane protein 87A OS=Homo sapiens OX=9606 GN=TMEM87A PE=1 SV=3 && PF06814:Lung seven transmembrane receptor	GRF
Solyc02g086480_1	0	5.773215906	6.828832765	115.8305	93.85684206	53.51980949	4.20068289	87.73571718	-4.342875851	9.06E-10	1.37E-08	Solyc02g086480_1	2	49794915	49795364	+	450	protein_coding	NA && sp|Q9FML4|LOB_ARATH Protein LATERAL ORGAN BOUNDARIES OS=Arabidopsis thaliana OX=3702 GN=LOB PE=1 SV=1 && PF03195:Lateral organ boundaries (LOB) domain	LBD
Solyc06g072580_3	338.2123357	264.1246277	315.264446	589.4159619	559.3867787	700.2175075	305.8671364	616.3400827	-1.010678695	9.69E-10	1.46E-08	Solyc06g072580_3	6	44902117	44909773	-	1743	protein_coding	NA && sp|Q6Z1G7|ODPB1_ORYSJ Pyruvate dehydrogenase E1 component subunit beta-1, mitochondrial OS=Oryza sativa subsp. japonica OX=39947 GN=Os08g0536000 PE=2 SV=1 && PF02780:Transketolase, C-terminal domain|PF02779:Transketolase, pyrimidine binding domain	NAC
Solyc03g080100_3	2.866206234	0	4.552555177	57.18214556	70.58034523	110.8624625	2.47292047	79.5416511	-4.940732962	9.75E-10	1.47E-08	Solyc03g080100_3	3	53434781	53437290	+	1500	protein_coding	NA && sp|Q9FLU5|HIP9_ARATH Heavy metal-associated isoprenylated plant protein 9 OS=Arabidopsis thaliana OX=3702 GN=HIPP09 PE=2 SV=1 && PF00403:Heavy-metal-associated domain	NAC
Solyc12g011090_2	434.2302445	412.7849373	348.270471	178.1443765	178.7034273	182.2222085	398.4285509	179.6900041	1.146834171	1.00E-09	1.51E-08	Solyc12g011090_2	12	3952753	3955459	+	798	protein_coding	NA && - && -	-
Solyc12g056960_2	468.6247193	401.2385054	454.1173789	189.140943	210.2393262	223.6363468	441.3268679	207.6722053	1.087271811	1.01E-09	1.51E-08	Solyc12g056960_2	12	63989603	63995524	-	1809	protein_coding	NA && sp|Q12700|EXG_SCHOC Glucan 1,3-beta-glucosidase OS=Schwanniomyces occidentalis OX=27300 PE=3 SV=1 && PF00150:Cellulase (glycosyl hydrolase family 5)	-
Solyc12g095920_2	113.2151463	102.4745823	79.66971559	307.9038607	294.3350567	244.0248457	98.45314806	282.087921	-1.523676707	1.01E-09	1.52E-08	Solyc12g095920_2	12	65999753	66004479	-	1309	protein_coding	NA && - && -	-
Solyc01g100660_3	186.3034052	127.0107499	137.7147941	333.5625158	412.9701051	384.1957753	150.3429831	376.9094654	-1.327988017	1.03E-09	1.54E-08	Solyc01g100660_3	1	90520406	90521602	+	900	protein_coding	NA && sp|O80482|BH149_ARATH Transcription factor bHLH149 OS=Arabidopsis thaliana OX=3702 GN=BHLH149 PE=1 SV=1 && -	bHLH
Solyc11g012500_2	70.22205274	38.96920736	33.00602503	0	0	0	47.39909504	0	8.511177278	1.03E-09	1.55E-08	Solyc11g012500_2	11	5325814	5329072	-	2296	protein_coding	NA && - && -	-
Solyc02g083570_3	163.3737554	248.2482839	146.8199044	56.44904113	31.53589893	22.29992062	186.1473146	36.76162023	2.342641811	1.03E-09	1.55E-08	Solyc02g083570_3	2	47484487	47486904	-	2020	protein_coding	NA && sp|P35133|UBC10_ARATH Ubiquitin-conjugating enzyme E2 10 OS=Arabidopsis thaliana OX=3702 GN=UBC10 PE=1 SV=1 && PF00179:Ubiquitin-conjugating enzyme	MYB_related
Solyc05g054493_1	167.6730647	102.4745823	188.9310398	448.6599113	335.6320672	500.1553625	153.026229	428.1491137	-1.479907403	1.05E-09	1.56E-08	Solyc05g054493_1	5	65262406	65263605	-	1200	protein_coding	NA && sp|Q9ZVU5|KIN17_ARATH KIN17-like protein OS=Arabidopsis thaliana OX=3702 GN=KIN17 PE=1 SV=1 && PF18131:KN17 SH3-like C-terminal domain|PF10357:Domain of Kin17 curved DNA-binding protein	-
Solyc09g083220_3	147.6096211	147.2170056	163.8919864	368.018424	351.4000167	345.9673399	152.9062043	355.1285935	-1.213403718	1.05E-09	1.57E-08	Solyc09g083220_3	9	69309163	69313303	+	1579	protein_coding	NA && sp|O22768|UNE12_ARATH Transcription factor UNE12 OS=Arabidopsis thaliana OX=3702 GN=UNE12 PE=1 SV=2 && PF00010:Helix-loop-helix DNA-binding domain	bHLH
Solyc02g082350_3	461.4592037	432.9911929	367.6188305	208.2016582	188.4645389	161.1965691	420.6897424	185.9542554	1.177427553	1.11E-09	1.65E-08	Solyc02g082350_3	2	46602116	46606477	+	3951	protein_coding	NA && sp|Q9SVW8|PIRL4_ARATH Plant intracellular Ras-group-related LRR protein 4 OS=Arabidopsis thaliana OX=3702 GN=PIRL4 PE=1 SV=1 && PF13855:Leucine rich repeat	ERF
Solyc12g096190_2	107.4827338	108.2477982	186.6547622	390.7446613	353.6525809	372.7272447	134.1284314	372.374829	-1.463891626	1.14E-09	1.70E-08	Solyc12g096190_2	12	66193301	66196737	+	2076	protein_coding	NA && sp|Q8Q001|TRPB2_METMA Tryptophan synthase beta chain 2 OS=Methanosarcina mazei (strain ATCC BAA-159 / DSM 3647 / Goe1 / Go1 / JCM 11833 / OCM 88) OX=192952 GN=trpB2 PE=3 SV=1 && PF00291:Pyridoxal-phosphate dependent enzyme	-
Solyc06g006110_3	70.22205274	50.51563917	23.90091468	0	0	0	48.21286886	0	8.534407675	1.15E-09	1.71E-08	Solyc06g006110_3	6	1141736	1148761	+	1757	protein_coding	NA && sp|Q93Z81|CAX3_ARATH Vacuolar cation/proton exchanger 3 OS=Arabidopsis thaliana OX=3702 GN=CAX3 PE=1 SV=1 && PF01699:Sodium/calcium exchanger protein	ERF
[truncated: 2,800 more rows]
