# Supplementary material for: Multi-omics analysis reveals the specific role of biocontrol reagents against tomato bacterial wilt
Source: Front Plant Sci. 2025 Jul 14;16:1620460. doi: 10.3389/fpls.2025.1620460 (PMC12301371; doi:10.3389/fpls.2025.1620460)
Supplement: Supplementary file 2 [file Table2.xls]

gene_id	Treat1_1	Treat1_2	Treat1_3	CK_1	CK_2	CK_3	Treat1	CK	log2FoldChange	pvalue	padj	gene_name	gene_chr	gene_start	gene_end	gene_strand	gene_length	gene_biotype	gene_description	Family
Solyc07g009230_3	8249.78192755613	8525.62643385601	7993.29491671555	45617.357186407	42154.2816577684	42200.986971715	8256.23442604256	43324.2086052968	-2.39143254408845	0	0	Solyc07g009230_3	7	4263182	4264706	+	772	protein_coding	NA && - && -	-
Solyc09g082280_3	1056.22307042709	793.62757770403	943.915432996584	19790.0810465039	19664.1901464996	19214.6698991901	931.255360375901	19556.3136973979	-4.39476840733439	0	0	Solyc09g082280_3	9	68485453	68487961	-	1248	protein_coding	NA && sp|Q9LJ86|LTPG5_ARATH Non-specific lipid transfer protein GPI-anchored 5 OS=Arabidopsis thaliana OX=3702 GN=LTPG5 PE=2 SV=1 && PF14368:Probable lipid transfer	-
ENSRNA050029732	12797.5542815361	13570.3271755634	13081.8335009499	2818.79495433416	2958.05637118659	3056.77291299891	13149.9049860165	2944.54141283989	2.15871142579553	0	0	SSU_rRNA_eukarya	3	35363005	35363667	+	663	rRNA	Eukaryotic small subunit ribosomal RNA && - && -	-
Solyc08g077910_3	2968.66657542069	2316.3124420267	2864.34006394129	17990.7027869358	17814.8114040001	17039.9541886076	2716.43969379623	17615.1561265145	-2.69791121281353	0	0	Solyc08g077910_3	8	61933436	61936837	+	2159	protein_coding	NA && sp|O23547|EXLB1_ARATH Expansin-like B1 OS=Arabidopsis thaliana OX=3702 GN=EXLB1 PE=2 SV=2 && PF03330:Lytic transglycolase|PF01357:Pollen allergen	bHLH
Solyc08g080650_2	22230.3583362414	22023.1652812868	21363.257299837	4674.37972350797	5292.53103544567	4768.05750813438	21872.2603057884	4911.65608902934	2.15506488288185	0	0	Solyc08g080650_2	8	64002840	64005894	+	1491	protein_coding	NA && sp|P12670|NP24_SOLLC Protein NP24 OS=Solanum lycopersicum OX=4081 PE=1 SV=2 && PF00314:Thaumatin family	MYB
Solyc07g062700_3	9576.59679944164	9704.32774748744	9441.76183116196	1777.04964616314	1653.12460123295	1878.46753721592	9574.22879269701	1769.54726153734	2.43503303359475	0	0	Solyc07g062700_3	7	65508462	65515692	-	4082	protein_coding	NA && sp|Q8L636|NCL_ARATH Sodium/calcium exchanger NCL OS=Arabidopsis thaliana OX=3702 GN=NCL PE=2 SV=1 && PF13499:EF-hand domain pair|PF01699:Sodium/calcium exchanger protein	bZIP
Solyc06g059740_3	1484.98689109551	1448.72253089759	1456.28941803478	10249.6035050796	9906.08604989666	9736.06581499698	1463.33294667596	9963.91845665774	-2.76756583744624	0	0	Solyc06g059740_3	6	37722996	37725472	+	1783	protein_coding	NA && sp|P28032|ADH2_SOLLC Alcohol dehydrogenase 2 OS=Solanum lycopersicum OX=4081 GN=ADH2 PE=2 SV=2 && PF00107:Zinc-binding dehydrogenase|PF08240:Alcohol dehydrogenase GroES-like domain	GRF
Solyc01g097270_3	16264.2666364528	15746.9329877872	16101.3198860605	1409.01250107389	1520.96959481558	1435.09837481857	16037.5065034335	1455.02682356934	3.46266816946384	0	0	Solyc01g097270_3	1	88055015	88059535	-	1482	protein_coding	NA && sp|P09762|WIN2_SOLTU Wound-induced protein WIN2 OS=Solanum tuberosum OX=4113 GN=WIN2 PE=2 SV=1 && PF00967:Barwin family|PF00187:Chitin recognition protein	-
Solyc04g082200_2	9188.35638865347	10072.9654093204	9452.19183594645	738.384146737629	739.118419124739	702.837088506204	9571.17121130677	726.779884789524	3.71999830649189	0	0	Solyc04g082200_2	4	66043586	66044958	-	1157	nontranslating_CDS	NA && - && PF00257:Dehydrin	-
ENSRNA050029954	4705.94437319	4854.51188432864	4780.85344309181	766.872377633658	739.118419124739	738.948603995581	4780.43656687015	748.313133584659	2.67566996644408	0	0	SSU_rRNA_eukarya	9	40511920	40512047	+	128	rRNA	Eukaryotic small subunit ribosomal RNA && - && -	-
Solyc11g071760_2	5014.44517098801	4416.60791024047	4911.22850289797	429.63331999958	425.744870973351	434.675649409165	4780.76052804215	430.017946794032	3.47424796391286	0	0	Solyc11g071760_2	11	55432314	55437016	-	1416	protein_coding	NA && sp|Q9SRE6|CML38_ARATH Calcium-binding protein CML38 OS=Arabidopsis thaliana OX=3702 GN=CML38 PE=1 SV=1 && PF13833:EF-hand domain pair|PF13499:EF-hand domain pair	FAR1
Solyc12g044950_2	291.507109783714	231.279042614932	216.422599278222	4580.44555676971	5158.00198699684	5184.00866803054	246.402917225623	4974.15207059903	-4.3371030486658	0	0	Solyc12g044950_2	12	61236791	61237892	-	1035	protein_coding	NA && sp|Q8GZC3|FAD2_VERFO Delta(12)-fatty-acid desaturase FAD2 OS=Vernicia fordii OX=73154 GN=FAD2 PE=1 SV=1 && PF11960:Domain of unknown function (DUF3474)|PF00487:Fatty acid desaturase	HSF
Solyc02g082920_3	7027.54359729706	6994.72353248611	7158.89453395614	52.3567486737839	68.0558715682308	41.4613696359511	7060.38722124643	53.9579966259886	7.04764567393794	0	0	CHI3	2	47106241	47107335	+	961	protein_coding	NA && sp|Q05539|CHIA_SOLLC Acidic 26 kDa endochitinase OS=Solanum lycopersicum OX=4081 GN=CHI3 PE=1 SV=1 && PF00182:Chitinase class I	NAC
Solyc03g020060_3	4296.78865407653	4698.36918043125	4037.71560219671	199.417616272206	158.269468763327	124.384108907853	4344.29114556817	160.690397981129	4.76249301252931	0	0	Solyc03g020060_3	3	62635272	62636217	+	828	protein_coding	NA && sp|Q43502|IP23_SOLLC Proteinase inhibitor type-2 CEVI57 OS=Solanum lycopersicum OX=4081 GN=CEVI57 PE=2 SV=1 && PF02428:Potato type II proteinase inhibitor family	-
Solyc10g050970_1	2700.68918750293	2572.24559578333	2632.27245748633	30.798087455167	50.6462300042648	28.7554660378371	2635.06908025753	36.7332611657563	6.17919736274188	0	0	Solyc10g050970_1	10	51186360	51187031	+	672	protein_coding	NA && sp|Q9SZ06|EF109_ARATH Ethylene-responsive transcription factor ERF109 OS=Arabidopsis thaliana OX=3702 GN=ERF109 PE=1 SV=1 && PF00847:AP2 domain	ERF
Solyc10g079860_2	3741.22577668605	3307.17290886428	3255.46524335977	103.173592974809	91.7962918827299	120.371718297923	3434.6213096367	105.113867718487	5.02383799085429	0	0	Solyc10g079860_2	10	61458331	61459707	-	1254	protein_coding	NA && sp|P36401|E13H_TOBAC Glucan endo-1,3-beta-glucosidase, acidic isoform PR-Q' OS=Nicotiana tabacum OX=4097 PE=1 SV=1 && PF00332:Glycosyl hydrolases family 17	FAR1
novel.1318	3073.24311704713	2827.00474424749	2800.45628463627	21.5586612186169	33.2365884402988	32.099124879446	2900.2347153103	28.9647915127872	6.64114169148699	0	0	-	SL3.00SC0000612	1	3512	-	2269	-	- && sp|P37842|CYTM_SOLTU Multicystatin OS=Solanum tuberosum OX=4113 PE=1 SV=1 && PF00031:Cystatin domain	bHLH
Solyc01g111440_3	3669.32940431787	4045.62223782261	4050.75310817733	322.609966092874	356.897652061303	398.564133919788	3921.90158343927	359.357250691322	3.44602286848426	3.98896167638576e-300	4.33843904103356e-297	Solyc01g111440_3	1	97593986	97597058	+	1770	protein_coding	NA && sp|O48832|ERD7_ARATH Protein EARLY-RESPONSIVE TO DEHYDRATION 7, chloroplastic OS=Arabidopsis thaliana OX=3702 GN=ERD7 PE=1 SV=1 && PF06911:Senescence-associated protein	bZIP
Solyc02g082930_3	2516.37303288632	2323.35647378147	2289.38605019613	90.0844058063635	106.040544071429	117.028059456314	2376.37185228797	104.384336444702	4.50472022161436	5.48222763517828e-293	5.64871423230975e-290	CHI17	2	47109617	47110752	+	777	protein_coding	NA && sp|Q05540|CHIB_SOLLC Acidic 27 kDa endochitinase OS=Solanum lycopersicum OX=4081 GN=CHI17 PE=1 SV=1 && PF00182:Chitinase class I	NAC
Solyc07g007760_3	228.761184807847	286.457291360626	254.231366622008	3464.01488651991	3291.21360293339	3300.19127666805	256.48328093016	3351.80658870712	-3.70495733723993	2.38769093076815e-290	2.33719126758241e-287	Solyc07g007760_3	7	2394864	2395702	-	336	protein_coding	NA && sp|P20346|DF322_SOLTU Defensin-like protein P322 OS=Solanum tuberosum OX=4113 PE=2 SV=1 && -	-
Solyc02g079500_3	1349.03738698113	1301.97186933989	1303.75059806158	6227.37328343477	6326.82201381401	6250.6358385038	1318.2532847942	6268.27704525086	-2.2496206248937	1.1956892997252e-289	1.11466711527239e-286	Solyc02g079500_3	2	44595355	44602184	-	2414	protein_coding	NA && sp|P15003|PER1_SOLLC Suberization-associated anionic peroxidase 1 OS=Solanum lycopersicum OX=4081 GN=TAP1 PE=3 SV=1 && PF00141:Peroxidase	NAC
Solyc03g122190_3	4146.45987548852	3931.74372445384	3598.35165064996	173.239241935314	267.475402210023	203.294457569825	3892.18508353077	214.669700571721	4.18245370738105	1.16492215596663e-275	1.03662186578903e-272	Solyc03g122190_3	3	71585569	71589220	-	2714	protein_coding	NA && sp|Q8H395|TI10B_ORYSJ Protein TIFY 10b OS=Oryza sativa subsp. japonica OX=39947 GN=TIFY10B PE=1 SV=1 && PF06200:tify domain|PF09425:Divergent CCT motif	-
Solyc02g077880_3	1487.60130463617	1503.90077964329	1743.11454960833	7858.13201418586	7702.18369736733	7972.62014193241	1578.20554462926	7844.31195116187	-2.31390226696707	2.01259599210343e-256	1.7130692059743e-253	Solyc02g077880_3	2	43281365	43282542	+	867	protein_coding	NA && sp|P93017|DRMH1_ARATH Dormancy-associated protein homolog 1 OS=Arabidopsis thaliana OX=3702 GN=DRMH1 PE=1 SV=1 && PF05564:Dormancy/auxin associated protein	-
Solyc05g010420_2	15996.289248535	15745.7589824947	16830.1164703769	3899.80782401052	3625.16218202401	4333.38185872522	16190.7215671356	3952.78395491992	2.03366941027277	2.34685443703936e-245	1.91434872141331e-242	Solyc05g010420_2	5	4642692	4655639	-	1331	protein_coding	NA && sp|Q38IY3|DCAM_SOLCI S-adenosylmethionine decarboxylase proenzyme OS=Solanum chilense OX=4083 GN=SAMDC PE=2 SV=1 && PF01536:Adenosylmethionine decarboxylase	-
Solyc09g097780_3	196.081015549583	193.710873256161	130.375059806158	3613.38561067747	3087.0459882287	3116.95877214788	173.388982870634	3272.46345701801	-4.23547862371	3.2550903497046e-244	2.54899615104668e-241	Solyc09g097780_3	9	72290467	72295832	+	848	protein_coding	NA && sp|P23137|GRP1_TOBAC Glycine-rich protein OS=Nicotiana tabacum OX=4097 GN=GRP PE=2 SV=1 && PF07172:Glycine rich protein family	-
Solyc06g074420_1	2011.79121953872	1996.98300247715	1877.40086120868	76.2252664515383	50.6462300042648	47.4799555508473	1962.05836107485	58.1171506688835	5.08333055667933	3.23019851507774e-242	2.43221524344911e-239	Solyc06g074420_1	6	46194906	46196363	+	1458	protein_coding	NA && sp|Q9ZUX1|C94C1_ARATH Cytochrome P450 94C1 OS=Arabidopsis thaliana OX=3702 GN=CYP94C1 PE=1 SV=1 && PF00067:Cytochrome P450	C2H2
Solyc02g038740_3	4428.81653787992	4924.95220187634	4756.08218172864	757.632951397108	705.090483340624	819.196416194196	4703.28364049497	760.639950310643	2.6273297669763	3.15381062373508e-238	2.28674631780969e-235	Solyc02g038740_3	2	31968485	31971196	-	2014	protein_coding	NA && sp|P48022|HMDH2_SOLLC 3-hydroxy-3-methylglutaryl-coenzyme A reductase 2 OS=Solanum lycopersicum OX=4081 GN=HMG2 PE=3 SV=1 && PF00368:Hydroxymethylglutaryl-coenzyme A reductase	HSF
ENSRNA050029894	8143.89817915936	9362.69220738112	8273.60129529879	1877.14343039243	1651.54190654532	1738.70259763666	8593.39722727975	1755.79597819147	2.29127814123523	1.4980644260009e-234	1.04741454527927e-231	LSU_rRNA_eukarya	SL3.00SC0000008	37009	38514	+	1506	rRNA	Eukaryotic large subunit ribosomal RNA && - && -	-
Solyc01g079880_3	709.813276289491	692.663122552333	855.260392328397	5009.30892458291	4995.77578151443	4732.61472441333	752.578930390074	4912.56647683689	-2.70758103655959	1.53077636014985e-225	1.03337961388461e-222	Solyc01g079880_3	1	78883463	78887702	-	1227	protein_coding	NA && sp|P24805|TSJT1_TOBAC Stem-specific protein TSJT1 OS=Nicotiana tabacum OX=4097 GN=TSJT1 PE=2 SV=1 && PF12481:Aluminium induced protein	-
Solyc07g056000_3	6419.69244909335	6984.15748485395	6745.60559437062	1736.24218028504	1788.4449970256	1716.63444928204	6716.48517610597	1747.10720886423	1.94311354743306	8.12910050872406e-224	5.30478002197636e-221	Solyc07g056000_3	7	64022163	64033504	+	1964	protein_coding	NA && sp|Q38911|XTH15_ARATH Xyloglucan endotransglucosylase/hydrolase protein 15 OS=Arabidopsis thaliana OX=3702 GN=XTH15 PE=1 SV=1 && PF06955:Xyloglucan endo-transglycosylase (XET) C-terminus|PF00722:Glycosyl hydrolases family 16	NAC
Solyc12g005940_2	1883.68495604633	2015.76708715654	2113.37971945782	80.8449795698134	103.666502039979	66.2044450638575	2004.27725422023	83.5719755578834	4.59200834842024	5.27203140328089e-223	3.32937286393645e-220	Solyc12g005940_2	12	563513	566260	-	1189	protein_coding	NA && sp|P07920|ACCO2_SOLLC 1-aminocyclopropane-1-carboxylate oxidase 2 OS=Solanum lycopersicum OX=4081 GN=ACO2 PE=2 SV=1 && PF03171:2OG-Fe(II) oxygenase superfamily|PF14226:non-haem dioxygenase in morphine synthesis N-terminal	STAT
Solyc06g005470_3	2447.0910740588	2542.89546347179	2066.4446979276	10951.7998990574	10452.907064474	11267.4615644539	2352.14374515273	10890.7228426617	-2.21053653422499	3.93734536465935e-222	2.408794068873e-219	Solyc06g005470_3	6	482746	484337	+	651	protein_coding	NA && sp|Q43515|MT2Z_SOLLC Metallothionein-like protein type 2 OS=Solanum lycopersicum OX=4081 PE=3 SV=1 && -	-
Solyc11g069430_2	964.718596503949	1112.95701725358	1088.63174938142	5201.79697117771	5659.71620297659	5608.65334091487	1055.43578771298	5490.05550502306	-2.37828855848352	2.23646463307123e-218	1.32676570065562e-215	Solyc11g069430_2	11	54305254	54308455	-	1395	protein_coding	NA && sp|Q8H5N9|PIP21_ORYSJ Probable aquaporin PIP2-1 OS=Oryza sativa subsp. japonica OX=39947 GN=PIP2-1 PE=2 SV=1 && PF00230:Major intrinsic protein	C3H
Solyc02g090360_3	4760.84705754388	4874.46997430049	4752.17092993446	1040.97535598464	1042.20445180651	924.856035589039	4795.82932059294	1002.67861446006	2.25902783338121	4.93711944282306e-213	2.84276433329844e-210	Solyc02g090360_3	2	52555217	52558328	-	2044	protein_coding	NA && sp|P29162|ASOL_TOBAC L-ascorbate oxidase homolog OS=Nicotiana tabacum OX=4097 PE=2 SV=1 && PF07731:Multicopper oxidase|PF00394:Multicopper oxidase|PF07732:Multicopper oxidase	bHLH
Solyc09g075210_3	27148.070206225	25329.1641848586	26314.9020712749	7219.84165167752	7059.60965418822	8370.51554408388	26264.0454874528	7549.98894998321	1.79818391943726	5.28903270043347e-211	2.95838266218246e-208	Solyc09g075210_3	9	67409276	67420507	+	1432	protein_coding	NA && sp|Q93WF6|SAG21_ARATH Protein SENESCENCE-ASSOCIATED GENE 21, mitochondrial OS=Arabidopsis thaliana OX=3702 GN=SAG21 PE=2 SV=1 && -	-
Solyc07g049530_3	5677.1990035456	5521.34689044682	6148.48782045841	63.1360792830923	54.602966723348	34.7740519527332	5782.34457148361	50.8376993197245	6.83729919881014	1.26536527576783e-210	6.88112666769633e-208	ACO1	7	59957577	59960265	+	2036	protein_coding	NA && sp|P05116|ACCO1_SOLLC 1-aminocyclopropane-1-carboxylate oxidase 1 OS=Solanum lycopersicum OX=4081 GN=ACO1 PE=2 SV=2 && PF14226:non-haem dioxygenase in morphine synthesis N-terminal|PF03171:2OG-Fe(II) oxygenase superfamily	STAT
Solyc02g092670_2	2129.43982886847	2229.43605038454	2200.73100952795	63.9060314694715	62.5164401615143	112.346937078061	2186.53562959365	79.5898029030157	4.76757158916913	5.29175800741829e-196	2.79991206787103e-193	Solyc02g092670_2	2	54315919	54324084	-	4479	protein_coding	NA && sp|O65351|SBT17_ARATH Subtilisin-like protease SBT1.7 OS=Arabidopsis thaliana OX=3702 GN=SBT1.7 PE=1 SV=1 && PF05922:Peptidase inhibitor I9|PF00082:Subtilase family|PF02225:PA domain|PF17766:Fibronectin type-III domain	bHLH
Solyc01g005470_3	3040.56294778887	2845.78882892688	3178.54395807413	303.361161433395	396.465019252135	317.647589952851	3021.63191159663	339.157923546127	3.15671352681184	5.39222633724451e-194	2.77798986853252e-191	Solyc01g005470_3	1	322539	324960	-	867	protein_coding	NA && sp|Q9LQU4|PCR2_ARATH Protein PLANT CADMIUM RESISTANCE 2 OS=Arabidopsis thaliana OX=3702 GN=PCR2 PE=1 SV=1 && PF04749:PLAC8 family	B3
Solyc02g078650_3	3971.29416826422	4164.19677236123	3903.42929059637	835.398122221405	808.756985380603	723.56777332418	4012.97341040728	789.240960308729	2.34739450955605	1.02783871417899e-189	5.15948679679028e-187	Solyc02g078650_3	2	43885831	43888640	+	2187	protein_coding	NA && sp|P43309|PPO_MALDO Polyphenol oxidase, chloroplastic OS=Malus domestica OX=3750 PE=1 SV=1 && PF12142:Polyphenol oxidase middle domain|PF12143:Protein of unknown function (DUF_B2219)|PF00264:Common central domain of tyrosinase	bZIP
Solyc04g009435_1	1911.13629822327	2333.92252141363	1617.95449219442	68.5257445877466	92.5876392265465	88.2725934184766	1954.33777061044	83.1286590775899	4.55457986459321	2.55817049062772e-178	1.25203259237547e-175	Solyc04g009435_1	4	2854903	2862162	+	4176	protein_coding	NA && sp|Q9C598|NAC81_ARATH Protein ATAF2 OS=Arabidopsis thaliana OX=3702 GN=NAC081 PE=1 SV=1 && PF02365:No apical meristem (NAM) protein	AP2
Solyc07g042170_3	3758.21946470034	4070.27634896431	4348.00824453537	893.144536199843	871.273425542117	868.013835281687	4058.83468606667	877.477265674549	2.20975978489034	5.37489164703326e-173	2.56644521399927e-170	Solyc07g042170_3	7	55305593	55306887	+	1145	protein_coding	NA && sp|Q8H395|TI10B_ORYSJ Protein TIFY 10b OS=Oryza sativa subsp. japonica OX=39947 GN=TIFY10B PE=1 SV=1 && PF09425:Divergent CCT motif|PF06200:tify domain	-
Solyc07g063940_2	4010.51037137414	4580.96865118509	4277.60571224004	802.2901782071	795.30408053572	919.506181442465	4289.69491159976	839.033480061762	2.35312782120857	2.48536903112626e-172	1.15847784577045e-169	Solyc07g063940_2	7	66395286	66398607	-	2278	protein_coding	NA && sp|Q69VG1|CIGR1_ORYSJ Chitin-inducible gibberellin-responsive protein 1 OS=Oryza sativa subsp. japonica OX=39947 GN=CIGR1 PE=2 SV=1 && PF03514:GRAS domain family	GRAS
ENSRNA050029737	4210.51300723472	4197.06892055016	4422.32202862488	947.811141432764	785.016565066104	799.803194912864	4276.63465213658	844.210300470577	2.34116237979838	3.41276874756503e-172	1.5537621807228e-169	SSU_rRNA_eukarya	3	35361831	35362196	+	366	rRNA	Eukaryotic small subunit ribosomal RNA && - && -	-
Solyc02g089615_1	1504.59499265047	1364.19414984036	1456.28941803478	93.9341667382593	96.5443759456297	80.2478121986151	1441.69285350854	90.2421182941681	4.00136006837729	6.1982111503696e-172	2.75778135660877e-169	Solyc02g089615_1	2	52007125	52007703	-	372	protein_coding	NA && - && PF08132:S-adenosyl-l-methionine decarboxylase leader peptide	-
Solyc04g078640_2	1726.82014360666	1891.32252615561	1937.37338871951	220.976277490823	209.707046111409	207.306848179756	1851.83868616059	212.663390593996	3.12289673056658	1.51333229437316e-164	6.58366807265406e-162	Solyc04g078640_2	4	63416461	63418883	+	2132	protein_coding	NA && sp|Q9FH94|ERF10_ARATH Ethylene-responsive transcription factor ERF010 OS=Arabidopsis thaliana OX=3702 GN=ERF010 PE=2 SV=1 && PF00847:AP2 domain	ERF
Solyc03g083440_3	1802.63813628583	1819.70820331545	2005.16841981871	7179.80413798581	8687.41114041904	7628.22328124669	1875.83825314	7831.81285321718	-2.06194939210267	3.29364534583003e-162	1.40173249859379e-159	Solyc03g083440_3	3	54763702	54775081	+	7393	protein_coding	NA && sp|Q9LV03|GLUT1_ARATH Glutamate synthase 1 [NADH], chloroplastic OS=Arabidopsis thaliana OX=3702 GN=GLT1 PE=1 SV=2 && PF01645:Conserved region in glutamate synthase|PF01493:GXGXG motif|PF07992:Pyridine nucleotide-disulphide oxidoreductase|PF00310:Glutamine amidotransferases class-II|PF14691:Dihydroprymidine dehydrogenase domain II, 4Fe-4S cluster|PF04898:Glutamate synthase central domain	C3H
Solyc08g080630_3	4417.05167694694	4772.33151385633	4874.72348615225	1294.28962530339	1246.3720665112	1274.60275042134	4688.03555898517	1271.75481407864	1.88217379024336	2.15796595806503e-161	8.98861692788066e-159	Solyc08g080630_3	8	64000788	64002067	-	697	protein_coding	NA && sp|P20076|IER1_SOLLC Ethylene-responsive proteinase inhibitor 1 OS=Solanum lycopersicum OX=4081 PE=3 SV=1 && PF00280:Potato inhibitor I family	-
Solyc10g081570_2	48018.9335013226	45654.717813246	49200.9400696479	8527.99041633574	8655.75724666638	7067.82605939303	47624.8637947388	8083.85790746505	2.55871804288289	6.50326467533629e-157	2.65238359477205e-154	Solyc10g081570_2	10	62734110	62737651	-	1377	protein_coding	NA && - && -	-
Solyc04g005480_1	3937.30679223563	4185.32886762554	3726.11920926	428.093415626821	582.431645049045	603.196055026257	3949.58495637372	537.907038567374	2.87532490741261	1.90327393895252e-156	7.6041620209946e-154	Solyc04g005480_1	4	323319	323831	-	513	protein_coding	NA && sp|Q9ZQ80|NDRP1_ARATH Nodulin-related protein 1 OS=Arabidopsis thaliana OX=3702 GN=NRP1 PE=1 SV=1 && -	-
Solyc09g075710_2	3478.47721584961	3315.39094591151	3100.31892219044	686.797350250224	581.640297705228	651.344742345426	3298.06236131718	639.927463433626	2.36519687736558	1.56928130616691e-153	6.1443640261659e-151	Solyc09g075710_2	9	67741505	67759491	-	4722	protein_coding	NA && sp|Q5NUF4|HIDM_GLYEC 2-hydroxyisoflavanone dehydratase OS=Glycyrrhiza echinata OX=46348 GN=HIDM PE=1 SV=1 && PF07859:alpha/beta hydrolase fold	NAC
Solyc08g077900_3	1717.66969621435	1932.41271139176	1690.96452568587	76.9952186379175	68.8472189120474	120.371718297923	1780.34897776399	88.7380519492959	4.31706415375484	2.30221828013629e-152	8.83735828828004e-150	Solyc08g077900_3	8	61925910	61929099	+	1079	protein_coding	NA && sp|O23547|EXLB1_ARATH Expansin-like B1 OS=Arabidopsis thaliana OX=3702 GN=EXLB1 PE=2 SV=2 && PF03330:Lytic transglycolase|PF01357:Pollen allergen	bHLH
Solyc03g093130_3	4652.34889560644	4065.58032779446	4422.32202862488	1104.11143526774	974.939927582097	1021.8221419957	4380.08375067526	1033.62450161518	2.08300224324453	5.80312307563187e-151	2.18476423945471e-148	Solyc03g093130_3	3	55733462	55735427	-	1789	protein_coding	NA && sp|Q38910|XTH23_ARATH Probable xyloglucan endotransglucosylase/hydrolase protein 23 OS=Arabidopsis thaliana OX=3702 GN=XTH23 PE=2 SV=1 && PF00722:Glycosyl hydrolases family 16|PF06955:Xyloglucan endo-transglycosylase (XET) C-terminus	ERF
Solyc12g042380_2	3285.01061384068	3462.14160746921	3294.57776130161	8443.29567583403	8769.71126417597	8593.20322293504	3347.24332753717	8602.07005431501	-1.36139103029148	5.37767856058702e-147	1.98639270152098e-144	Solyc12g042380_2	12	58502750	58506205	+	2097	protein_coding	NA && - && PF07712:Stress up-regulated Nod 19	-
Solyc04g005160_2	3458.86911429465	3513.79784033752	3411.91531512715	883.135157776914	766.024228814505	785.091096009784	3461.52742325311	811.416827533734	2.09320576127611	1.51629600603293e-145	5.49713461298273e-143	Solyc04g005160_2	4	107065	114095	-	1993	protein_coding	NA && sp|Q9FWA3|6PGD2_ARATH 6-phosphogluconate dehydrogenase, decarboxylating 2 OS=Arabidopsis thaliana OX=3702 GN=PGD2 PE=1 SV=1 && PF00393:6-phosphogluconate dehydrogenase, C-terminal domain|PF03446:NAD binding domain of 6-phosphogluconate dehydrogenase	-
Solyc08g076390_3	2905.92065044482	2824.65673366257	2717.01624636033	352.638101361662	447.1112492564	314.972662879564	2815.86454348924	371.574004499209	2.92440330704932	5.06703859142003e-145	1.80358935462236e-142	Solyc08g076390_3	8	60520299	60526570	+	3404	protein_coding	NA && sp|Q336N8|JM706_ORYSJ Lysine-specific demethylase JMJ706 OS=Oryza sativa subsp. japonica OX=39947 GN=JMJ706 PE=2 SV=1 && PF02375:jmjN domain|PF02373:JmjC domain, hydroxylase|PF02928:C5HC2 zinc finger	C2H2
Solyc04g078460_3	986.941111599569	967.380360988344	1041.6967278512	22.3286134049961	23.7404203144991	32.099124879446	998.672733479705	26.0560528663137	5.24932997116565	1.02004741214849e-143	3.56597646207695e-141	Solyc04g078460_3	4	63270557	63272244	-	1359	protein_coding	NA && sp|Q8GXG1|ASPGB_ARATH Probable isoaspartyl peptidase/L-asparaginase 2 OS=Arabidopsis thaliana OX=3702 GN=At3g16150 PE=2 SV=2 && PF01112:Asparaginase	NAC
Solyc02g088630_3	2103.29569346186	2033.37716654346	2082.08970510434	211.736851254273	166.97428954531	250.10568135235	2072.92085503656	209.605607383978	3.30179198460927	2.01393359045731e-143	6.9169785790145e-141	Solyc02g088630_3	2	51293473	51298711	-	2744	protein_coding	NA && sp|Q0WV13|GAUTD_ARATH Probable galacturonosyltransferase 13 OS=Arabidopsis thaliana OX=3702 GN=GAUT13 PE=2 SV=1 && PF01501:Glycosyl transferase family 8	C2H2
Solyc07g052480_3	1606.55712073625	1479.24666850159	1275.06808490423	91.6243101791218	56.9770087547979	78.9103486619715	1453.62395804736	75.8372225319637	4.25826170402961	3.41784872150161e-142	1.15364180035926e-139	Solyc07g052480_3	7	61097644	61100978	-	3041	nontranslating_CDS	NA && sp|P49297|ACEA_SOLLC Isocitrate lyase OS=Solanum lycopersicum OX=4081 PE=2 SV=1 && PF00463:Isocitrate lyase family	AP2
Solyc07g009500_2	14243.3249695217	13525.7149744499	14236.9565308325	32899.2869717958	29844.8737247006	30470.7630235825	14001.9988249347	31071.6412400263	-1.15005506794115	2.00123668629069e-141	6.64037467923948e-139	Solyc07g009500_2	7	4618758	4625935	+	630	protein_coding	NA && sp|Q9FRV1|CHIA_SECCE Basic endochitinase A OS=Secale cereale OX=4550 GN=rsca PE=1 SV=1 && PF00187:Chitin recognition protein	-
Solyc03g118970_3	2189.57134030368	2332.74851612116	2608.80494672122	282.572452401157	216.829172205759	307.616613428025	2377.04160104869	269.00607934498	3.14072480944989	2.76852036478097e-138	9.03322053021952e-136	Solyc03g118970_3	3	69197030	69200063	-	1822	protein_coding	NA && sp|Q9FHB6|DTX16_ARATH Protein DETOXIFICATION 16 OS=Arabidopsis thaliana OX=3702 GN=DTX16 PE=2 SV=1 && PF01554:MatE	HD-ZIP
Solyc07g008560_3	4417.05167694694	4899.12408544218	4698.71715541393	1258.87182472995	1087.31125040406	1258.55318798161	4671.63097260102	1201.57875437187	1.95855924449195	2.96097623264069e-137	9.50279208301751e-135	Solyc07g008560_3	7	3500634	3508016	+	2419	protein_coding	NA && sp|Q5MAU8|PPA27_ARATH Probable inactive purple acid phosphatase 27 OS=Arabidopsis thaliana OX=3702 GN=PAP27 PE=2 SV=1 && PF14008:Iron/zinc purple acid phosphatase-like protein C|PF16656:Purple acid Phosphatase, N-terminal domain|PF00149:Calcineurin-like phosphoesterase|PF17808:Fn3-like domain from Purple Acid Phosphatase	GRAS
Solyc01g079200_3	1411.783311957	1514.46682727544	1362.41937497435	150.140676343939	161.434858138594	146.452257262473	1429.5565047356	152.675930581669	3.22847743506067	9.88572152855715e-136	3.12149629620264e-133	Solyc01g079200_3	1	78143255	78146506	-	1296	protein_coding	NA && sp|Q9XHM5|G2OX2_PEA Gibberellin 2-beta-dioxygenase 2 OS=Pisum sativum OX=3888 GN=GA2OX2 PE=2 SV=1 && PF14226:non-haem dioxygenase in morphine synthesis N-terminal|PF03171:2OG-Fe(II) oxygenase superfamily	Dof
Solyc04g074490_3	1571.26253793733	1562.60104426637	1237.25931756044	123.962302007047	106.831891415246	108.33454646813	1457.04096658804	113.042913296808	3.68903458321329	1.02431007755543e-133	3.18300291877819e-131	Solyc04g074490_3	4	60567529	60578930	+	3483	protein_coding	NA && sp|Q9M9E8|FB92_ARATH F-box protein At1g78280 OS=Arabidopsis thaliana OX=3702 GN=At1g78280 PE=2 SV=3 && PF13621:Cupin-like domain|PF12937:F-box-like	GATA
Solyc06g083310_3	2700.68918750293	2865.74691889872	3121.17893175942	592.093231325586	553.943140671646	488.174190874909	2895.87167938702	544.736854290713	2.41164148603996	1.68530026306818e-132	5.15517550782591e-130	Solyc06g083310_3	6	48814053	48818335	-	2713	protein_coding	NA && sp|Q9LSG3|GAUT8_ARATH Galacturonosyltransferase 8 OS=Arabidopsis thaliana OX=3702 GN=GAUT8 PE=1 SV=1 && PF01501:Glycosyl transferase family 8	MIKC_MADS
Solyc07g049550_3	1098.05368707767	1699.95966348437	1378.06438215109	43.1173224372338	53.8116193795313	62.8607862222485	1392.02591090438	53.2632426796712	4.70338718359919	3.72178018955775e-132	1.12094293493803e-129	ACO4	7	59974707	59976764	+	1334	protein_coding	NA && sp|P24157|ACCO4_SOLLC 1-aminocyclopropane-1-carboxylate oxidase 4 OS=Solanum lycopersicum OX=4081 GN=ACO4 PE=2 SV=1 && PF14226:non-haem dioxygenase in morphine synthesis N-terminal|PF03171:2OG-Fe(II) oxygenase superfamily	STAT
Solyc11g068770_1	1309.82118387122	1292.5798270002	1290.71309208096	132.431776057218	108.414586102879	106.328351163165	1297.70470098413	115.724904441087	3.48887288134563	8.18718017182288e-132	2.42849130642086e-129	Solyc11g068770_1	11	53701528	53702385	+	858	protein_coding	NA && sp|Q9FMS6|CAF1K_ARATH Probable CCR4-associated factor 1 homolog 11 OS=Arabidopsis thaliana OX=3702 GN=CAF1-11 PE=2 SV=1 && PF04857:CAF1 family ribonuclease	-
Solyc03g116510_1	1878.45612896501	1708.1777005316	1651.85200774402	185.558476917381	119.493448916312	154.477038482334	1746.16194574688	153.176321438676	3.50985327300162	5.12825691164193e-131	1.47641008175315e-128	Solyc03g116510_1	3	67391192	67391473	+	282	protein_coding	NA && - && -	-
Solyc06g074670_3	1675.83907956377	1804.44613451345	1724.86204123547	117.802684516014	188.34066782836	149.795916104082	1735.04908510423	151.979756149485	3.51432313572172	1.21028355653007e-129	3.43387263567958e-127	Solyc06g074670_3	6	46350099	46354335	-	1825	protein_coding	NA && sp|Q9SGE0|AXS2_ARATH UDP-D-apiose/UDP-D-xylose synthase 2 OS=Arabidopsis thaliana OX=3702 GN=AXS2 PE=2 SV=1 && PF01370:NAD dependent epimerase/dehydratase family	Trihelix
Solyc10g055800_2	16117.8594781757	17520.8549846967	16166.5074159636	6968.83723891791	7522.54785032095	7160.77977518976	16601.7406262787	7217.38828814287	1.20196622505388	9.24828494451012e-128	2.58648106226678e-125	Solyc10g055800_2	10	57355938	57358464	-	2376	protein_coding	NA && sp|P52405|CHI3_SOLTU Endochitinase 3 (Fragment) OS=Solanum tuberosum OX=4113 GN=CHTB3 PE=2 SV=1 && PF00182:Chitinase class I|PF00187:Chitin recognition protein	NAC
Solyc10g012370_3	1586.94901918129	1640.08539356883	1427.60690487743	152.450532903077	189.132015172176	144.446061957507	1551.54710587585	162.009536677587	3.26257619066983	4.65127510952967e-125	1.28250722280651e-122	Solyc10g012370_3	10	4997229	5005608	-	1421	protein_coding	NA && sp|Q76MX2|CAS1_SOLTU Bifunctional L-3-cyanoalanine synthase/cysteine synthase 1, mitochondrial OS=Solanum tuberosum OX=4113 GN=PCAS-1 PE=1 SV=1 && PF00291:Pyridoxal-phosphate dependent enzyme	GeBP
Solyc02g087070_3	2305.9127428631	2339.79254787593	2353.26982950115	551.285765447489	545.238319889663	562.403417158628	2332.99170674673	552.97583416526	2.07661396040955	1.84673088780538e-122	5.02131258202304e-120	Solyc02g087070_3	2	50236632	50250671	+	3104	protein_coding	NA && sp|Q9SGH6|DOX1_ARATH Alpha-dioxygenase 1 OS=Arabidopsis thaliana OX=3702 GN=DOX1 PE=1 SV=1 && PF03098:Animal haem peroxidase	-
Solyc06g050870_3	56.2098911242138	48.1342169909249	48.2387721282785	1216.5244544791	1171.98541619244	1017.80975138577	50.8609600811391	1135.4398740191	-4.48204136089641	5.74568396918765e-119	1.5408665077368e-116	Solyc06g050870_3	6	33800848	33801501	-	504	protein_coding	NA && - && -	-
Solyc07g006500_3	3270.63133936705	3585.41216317767	3108.14142577881	852.337070321747	902.135971950966	865.3389082084	3321.39497610784	873.270650160371	1.92777608192387	1.02927431175724e-118	2.72298691909073e-116	Solyc07g006500_3	7	1301058	1304641	+	3414	protein_coding	NA && sp|Q9ZV48|TPS11_ARATH Probable alpha,alpha-trehalose-phosphate synthase [UDP-forming] 11 OS=Arabidopsis thaliana OX=3702 GN=TPS11 PE=2 SV=1 && PF00982:Glycosyltransferase family 20|PF02358:Trehalose-phosphatase	-
Solyc04g071070_2	3420.96011795506	3327.13099883612	3443.20532948063	902.383962436393	921.128308202565	1023.82833730066	3397.09881542394	949.113535979874	1.83864260389448	4.59170133472673e-118	1.1985564937326e-115	Solyc04g071070_2	4	58068230	58069737	+	1224	protein_coding	NA && - && -	-
Solyc06g060110_3	6652.37525421219	6318.49648402824	6507.01923492535	1854.04486480105	1583.48603497709	2029.60091685664	6492.63032438859	1822.37727221159	1.8321095914101	1.4419114261707e-117	3.71424999870313e-115	Solyc06g060110_3	6	38147692	38150530	-	2246	protein_coding	NA && sp|Q39134|AAP3_ARATH Amino acid permease 3 OS=Arabidopsis thaliana OX=3702 GN=AAP3 PE=1 SV=2 && PF01490:Transmembrane amino acid transporter protein	MYB_related
Solyc03g116890_3	3930.77075838398	3595.97821080983	3383.2328019698	647.529788744886	509.627689417914	728.248895702432	3636.66059038787	628.468791288411	2.53099258903148	1.25797413049056e-116	3.19835838345633e-114	Solyc03g116890_3	3	67623408	67626540	-	2137	protein_coding	NA && sp|Q9SAH7|WRK40_ARATH Probable WRKY transcription factor 40 OS=Arabidopsis thaliana OX=3702 GN=WRKY40 PE=1 SV=1 && PF03106:WRKY DNA -binding domain	WRKY
Solyc02g081390_3	3049.71339518118	3114.63604090058	2745.69875951769	615.191796916961	531.78541504478	672.744158931723	2970.01606519982	606.573790297821	2.29043041104028	2.50193831004093e-116	6.27954439688093e-114	Solyc02g081390_3	2	45929669	45944446	-	3050	protein_coding	NA && sp|Q8H191|PAO4_ARATH Probable polyamine oxidase 4 OS=Arabidopsis thaliana OX=3702 GN=PAO4 PE=1 SV=1 && PF01965:DJ-1/PfpI family|PF01593:Flavin containing amine oxidoreductase	bHLH
Solyc03g112100_3	166.01525983198	233.627053199855	166.880076551882	1897.93213942467	1656.28999060822	1800.22592032227	188.840796527906	1784.81601678505	-3.23601051048874	2.85669355701806e-116	7.07917591971424e-114	Solyc03g112100_3	3	64104026	64105237	-	697	protein_coding	NA && sp|Q9SB67|NRT32_ARATH High-affinity nitrate transporter 3.2 OS=Arabidopsis thaliana OX=3702 GN=NRT3.2 PE=2 SV=1 && PF16974:High-affinity nitrate transporter accessory	-
Solyc10g007600_3	2418.33252511153	2600.4217228024	2952.99510460948	464.281168386642	534.950804420047	540.335268804008	2657.24978417447	513.189080536899	2.37179942446221	5.87601364490616e-115	1.4379339890791e-112	Solyc10g007600_3	10	1887487	1891843	-	1514	protein_coding	NA && sp|Q9LRR9|GLO1_ARATH (S)-2-hydroxy-acid oxidase GLO1 OS=Arabidopsis thaliana OX=3702 GN=GLO1 PE=1 SV=1 && PF01070:FMN-dependent dehydrogenase	G2-like
Solyc03g111300_1	862.756468418166	948.596276308958	771.820354052455	9.2394262365501	11.0788628134329	9.3622447565051	861.057699593193	9.89351126882937	6.44799699921222	7.26039441307602e-115	1.75477458549123e-112	Solyc03g111300_1	3	63400740	63402215	+	1476	protein_coding	NA && sp|Q9FMV7|C94B1_ARATH Cytochrome P450 94B1 OS=Arabidopsis thaliana OX=3702 GN=CYP94B1 PE=1 SV=1 && PF00067:Cytochrome P450	C2H2
Solyc10g079090_2	1575.18415824832	1991.11297601484	1787.44206994243	236.375321218407	173.305068295844	189.919822203389	1784.5797347352	199.866737239213	3.15917685088455	9.33675993116201e-115	2.22909450210193e-112	Solyc10g079090_2	10	60840293	60845333	+	1567	protein_coding	NA && sp|Q9FL54|DNAJ6_ARATH Chaperone protein dnaJ 6 OS=Arabidopsis thaliana OX=3702 GN=ATJ6 PE=2 SV=1 && PF00226:DnaJ domain	TCP
Solyc02g092790_3	4277.18055252158	3761.51295704691	3851.27926667391	870.815922794847	879.186898980284	1064.62097516829	3963.32425874746	938.207932314475	2.07735831864007	6.39650371502311e-114	1.50872714733744e-111	Solyc02g092790_3	2	54399306	54405345	+	3748	protein_coding	NA && sp|Q9SNV9|NRAM3_ARATH Metal transporter Nramp3 OS=Arabidopsis thaliana OX=3702 GN=NRAMP3 PE=1 SV=2 && PF01566:Natural resistance-associated macrophage protein	-
Solyc01g006430_3	2180.42089291137	2284.61429913024	2714.40874516421	7419.25926794973	7739.37702252671	7999.36941266528	2393.1479790686	7719.33523438057	-1.689891505236	4.85552477593411e-113	1.13162629212455e-110	Solyc01g006430_3	1	1033439	1038597	-	1319	protein_coding	NA && sp|Q84VT2|FAD12_PUNGR Delta(12)-acyl-lipid-desaturase OS=Punica granatum OX=22663 GN=FAD12 PE=2 SV=2 && PF00487:Fatty acid desaturase|PF11960:Domain of unknown function (DUF3474)	HSF
Solyc12g005910_2	1729.43455714732	2188.34586514839	1604.9169862138	220.206325304444	238.986897832624	217.337824704583	1840.89913616984	225.51034928055	3.03042837381156	8.05020364852568e-112	1.85410396267279e-109	Solyc12g005910_2	12	541681	547122	+	1276	protein_coding	NA && - && -	-
Solyc07g043000_3	216.996323874872	245.367106124471	177.310081336375	1651.54743978333	1728.30259889554	1639.73029592504	213.224503778573	1673.19344486797	-2.96918535851029	1.98978590360678e-111	4.52953937615231e-109	Solyc07g043000_3	7	56656282	56666761	-	1448	protein_coding	NA && sp|Q00451|PRF1_SOLLC 36.4 kDa proline-rich protein OS=Solanum lycopersicum OX=4081 GN=TPRP-F1 PE=2 SV=1 && PF14547:Hydrophobic seed protein	HD-ZIP
Solyc03g116580_3	1492.83013171749	1628.34534064421	1784.8345687463	255.624125877886	261.14462345949	246.09329074242	1635.33668036934	254.287346693265	2.68568651618638	1.44421262391596e-110	3.24981040671295e-108	Solyc03g116580_3	3	67417834	67424207	-	1798	protein_coding	NA && sp|Q9LW07|PGLR3_ARATH Probable polygalacturonase At3g15720 OS=Arabidopsis thaliana OX=3702 GN=At3g15720 PE=3 SV=1 && PF00295:Glycosyl hydrolases family 28|PF06232:Embryo-specific protein 3, (ATS3)	NAC
ENSRNA050029910	3325.53402372093	3649.98245426306	3149.86144491678	806.139939138996	631.495180365676	625.932935149198	3375.12597430026	687.856018217957	2.29561447931234	6.15932321655553e-109	1.37023943875577e-106	LSU_rRNA_eukarya	SL3.00SC0000032	22213	29751	+	7539	rRNA	Eukaryotic large subunit ribosomal RNA && sp|Q6CQE5|TAR1_KLULA Protein TAR1 OS=Kluyveromyces lactis (strain ATCC 8585 / CBS 2359 / DSM 70799 / NBRC 1267 / NRRL Y-1140 / WM37) OX=284590 GN=TAR1-A PE=4 SV=2 && -	-
Solyc10g055810_2	3937.30679223563	3723.94478768814	4023.37434561804	1329.70742587684	1346.87317917592	1318.73904713058	3894.87530851394	1331.77321739444	1.54814318160731	1.46864387121946e-108	3.2305214681869e-106	CHI9	10	57363714	57364923	-	1028	protein_coding	NA && sp|Q05538|CHIC_SOLLC Basic 30 kDa endochitinase OS=Solanum lycopersicum OX=4081 GN=CHI9 PE=1 SV=1 && PF00187:Chitin recognition protein|PF00182:Chitinase class I	NAC
Solyc04g081530_1	945.110494948991	825.325720600492	930.877927015968	15.3990437275835	36.4019778155653	18.7244895130102	900.438047521817	23.5085036853863	5.27110579368605	1.63601465046228e-108	3.55869542356667e-106	Solyc04g081530_1	4	65562982	65563449	+	468	protein_coding	NA && sp|Q9FYB5|DNJ11_ARATH Chaperone protein dnaJ 11, chloroplastic OS=Arabidopsis thaliana OX=3702 GN=ATJ11 PE=1 SV=2 && PF00226:DnaJ domain	bHLH
Solyc01g102910_3	939.881667867669	725.535270741258	683.165313384268	3636.48417626884	3670.26898062156	3770.30970979827	782.860750664398	3692.35428889622	-2.23853538654013	3.53799261408834e-108	7.61134960505575e-106	Solyc01g102910_3	1	91450976	91453382	+	2301	protein_coding	NA && sp|Q9FID0|GL114_ARATH Germin-like protein subfamily 1 member 14 OS=Arabidopsis thaliana OX=3702 GN=At5g39110 PE=3 SV=1 && PF00190:Cupin	E2F/DP
Solyc04g080540_2	930.731220475355	825.325720600492	1019.53296768416	3976.80304264844	3550.77553170525	3573.03383814334	925.196636253334	3700.20413749901	-2.00084074565484	4.54154535296025e-108	9.664112323359e-106	Solyc04g080540_2	4	64762143	64763686	+	821	protein_coding	NA && - && -	-
Solyc02g063450_3	428.763820668422	448.470021720324	415.896440781644	2095.03989913774	1991.82126438648	2251.61986393948	431.043427723463	2112.82700915456	-2.29289289960826	3.2167716706083e-107	6.77147731134395e-105	Solyc02g063450_3	2	36087659	36093959	-	3395	protein_coding	NA && sp|Q9ZQ47|GRDP1_ARATH Glycine-rich domain-containing protein 1 OS=Arabidopsis thaliana OX=3702 GN=GRDP1 PE=2 SV=1 && PF07173:Glycine-rich domain-containing protein-like	GRAS
Solyc06g034370_1	1576.49136501865	1265.57770527359	1105.58050715622	97.013975483776	103.666502039979	116.359327687992	1315.88319248282	105.679935070582	3.63597241379569	3.92929643664334e-107	8.18338684469858e-105	Solyc06g034370_1	6	24270678	24271256	-	579	protein_coding	NA && sp|P17407|21KD_DAUCA 21 kDa protein OS=Daucus carota OX=4039 PE=2 SV=1 && PF04043:Plant invertase/pectin methylesterase inhibitor	Trihelix
Solyc08g036620_3	1253.611292747	1340.71404399113	1560.58946587971	3.0798087455167	4.74808406289982	4.01239060993076	1384.97160087261	3.94676113944909	8.45618109899316	8.14315985350163e-106	1.67809095212633e-103	Solyc08g036620_3	8	10664074	10664829	+	569	protein_coding	NA && sp|Q8LBM2|TIF5A_ARATH Protein TIFY 5A OS=Arabidopsis thaliana OX=3702 GN=TIFY5A PE=1 SV=1 && PF09425:Divergent CCT motif|PF06200:tify domain	-
Solyc06g076020_3	2070.6155242036	1899.54056320284	2353.26982950115	331.849392329424	361.645736124203	274.848756780257	2107.8086389692	322.781295077961	2.70904429404074	1.73746476832535e-105	3.54316122599015e-103	Solyc06g076020_3	6	47333986	47337132	-	2355	protein_coding	NA && sp|P24629|HSP71_SOLLC Heat shock cognate 70 kDa protein 1 OS=Solanum lycopersicum OX=4081 GN=HSC-I PE=2 SV=1 && PF00012:Hsp70 protein	GATA
Solyc04g007030_3	379.089963395861	353.375593030936	344.190157888257	1804.76792487279	2045.63288376601	2135.26053625148	358.885238105018	1995.22044829676	-2.47542921225506	6.76195390481965e-105	1.3647296040686e-102	Solyc04g007030_3	4	742397	747898	-	3640	protein_coding	NA && sp|Q6L3N7|R1C3_SOLDE Putative late blight resistance protein homolog R1C-3 OS=Solanum demissum OX=50514 GN=R1C-3 PE=3 SV=1 && PF18052:Rx N-terminal domain|PF00931:NB-ARC domain	bHLH
Solyc04g054910_3	410.462925883794	572.914582721252	587.991519725773	2834.19399806174	2875.75624742966	3058.77910830388	523.789676110273	2922.90978459843	-2.47930647161508	1.3391725453386e-104	2.67520213470345e-102	Solyc04g054910_3	4	53346864	53348369	+	1192	protein_coding	NA && sp|O65665|ERF60_ARATH Ethylene-responsive transcription factor ERF060 OS=Arabidopsis thaliana OX=3702 GN=ERF060 PE=1 SV=1 && PF00847:AP2 domain	ERF
Solyc01g108240_3	1458.8427556889	1235.05356766958	1766.58206037344	121.65244544791	90.2135971950966	69.5481039054664	1486.82612791064	93.8047155161576	3.99086106317879	2.09256171467155e-104	4.13798794829546e-102	Solyc01g108240_3	1	95501843	95503129	+	1287	protein_coding	NA && sp|Q9SZ06|EF109_ARATH Ethylene-responsive transcription factor ERF109 OS=Arabidopsis thaliana OX=3702 GN=ERF109 PE=1 SV=1 && PF00847:AP2 domain	ERF
Solyc07g008240_3	415.691752965116	306.415381332473	338.975155496011	2028.05405892275	2226.85142550002	2076.41214063917	353.694096597867	2110.43920835398	-2.57898145946179	6.07121121961272e-104	1.18856102046358e-101	Solyc07g008240_3	7	2965816	2968253	-	982	protein_coding	NA && sp|Q947C5|HBL1_GOSHI Non-symbiotic hemoglobin 1 OS=Gossypium hirsutum OX=3635 GN=HB1 PE=2 SV=1 && PF00042:Globin	-
Solyc05g005160_3	1677.1462863341	1657.69547295575	1719.64703884322	224.05608623634	300.711990650322	246.09329074242	1684.82959937769	256.953789209694	2.71415186982456	2.37537309661615e-103	4.60422565469845e-101	Solyc05g005160_3	5	141137	145033	-	1767	protein_coding	NA && sp|O22718|ACLA2_ARATH ATP-citrate synthase alpha chain protein 2 OS=Arabidopsis thaliana OX=3702 GN=ACLA-2 PE=2 SV=1 && PF16114:ATP citrate lyase citrate-binding|PF08442:ATP-grasp domain	-
Solyc03g020070_3	1092.82485999634	1007.29654093204	1080.80924579305	53.8966530465422	81.5087764131136	42.7988331725947	1060.31021557381	59.4014208774169	4.16671342287177	8.88245045202931e-101	1.70482090685665e-98	Solyc03g020070_3	3	62629088	62629630	+	543	protein_coding	NA && sp|P01080|IP2K_SOLTU Proteinase inhibitor type-2 K OS=Solanum tuberosum OX=4113 GN=PIN2K PE=1 SV=2 && PF02428:Potato type II proteinase inhibitor family	-
Solyc11g072550_2	1886.29936958699	1522.68486432267	1800.47957592304	213.276755627031	191.506057203626	264.149048487108	1736.4879366109	222.977287105922	2.95774936894036	1.4494064036746e-100	2.75485720045996e-98	Solyc11g072550_2	11	56029266	56032252	+	1059	protein_coding	NA && sp|Q949R4|DIOXL_ARATH Extradiol ring-cleavage dioxygenase OS=Arabidopsis thaliana OX=3702 GN=LIGB PE=2 SV=1 && PF02900:Catalytic LigB subunit of aromatic ring-opening dioxygenase	ZF-HD
Solyc03g119530_3	918.96635954238	1015.51457797927	1246.38557174687	4366.3988489563	4114.2148405027	4410.95474385054	1060.28883642284	4297.18947776985	-2.01933077402403	2.23293435514682e-100	4.20328421833744e-98	Solyc03g119530_3	3	69594152	69603197	+	2864	protein_coding	NA && sp|Q9M886|LBD41_ARATH LOB domain-containing protein 41 OS=Arabidopsis thaliana OX=3702 GN=LBD41 PE=2 SV=1 && PF03195:Lateral organ boundaries (LOB) domain	LBD
Solyc10g054440_2	6759.5662093793	7429.10549069689	7374.0133826363	2989.72433971034	2696.9117477271	2888.92123915014	7187.5616942375	2858.51910886253	1.33021084386646	5.00410406376886e-99	9.33003288156218e-97	Solyc10g054440_2	10	55366325	55368444	-	2016	protein_coding	NA && sp|O23141|SPE2_ARATH Arginine decarboxylase 2 OS=Arabidopsis thaliana OX=3702 GN=ADC2 PE=1 SV=1 && PF02784:Pyridoxal-dependent decarboxylase, pyridoxal binding domain	G2-like
Solyc07g007140_3	2474.54241623574	2205.95594453531	2243.75477926398	473.520594623193	506.462300042648	390.539352699927	2308.08438001168	456.840749121922	2.33870531835915	8.95284343787883e-99	1.65348883003164e-96	Solyc07g007140_3	7	1876172	1900089	-	6996	protein_coding	NA && sp|A7J1T2|M313A_XENLA Mitogen-activated protein kinase kinase kinase 13-A OS=Xenopus laevis OX=8355 GN=map3k13-a PE=2 SV=1 && PF03790:KNOX1 domain	NF-YC
Solyc07g053220_2	282.3566623914	313.459413087242	299.862637554163	1576.86207770455	1782.90556561888	1698.57869153735	298.559571010935	1686.1154449536	-2.4966933440388	1.55232026580515e-98	2.840165779782e-96	Solyc07g053220_2	7	61794132	61797592	+	3461	protein_coding	NA && sp|O64477|Y2913_ARATH G-type lectin S-receptor-like serine/threonine-protein kinase At2g19130 OS=Arabidopsis thaliana OX=3702 GN=At2g19130 PE=2 SV=1 && -	MYB_related
Solyc03g025670_3	926.809600164363	963.858345110959	1392.40563872977	68.5257445877466	60.1423981300644	53.4985414657434	1094.35786133503	60.7222280611848	4.17427140007405	1.67489678257776e-98	3.03606058449303e-96	Solyc03g025670_3	3	3136385	3137881	+	889	protein_coding	NA && - && PF06521:PAR1 protein	-
Solyc11g010250_1	1511.13102650212	1244.44561000928	1217.70305858952	158.61015039411	131.363659073562	164.508015007161	1324.42656503364	151.493941491611	3.12576972092456	7.24816867982523e-98	1.30181099307283e-95	Solyc11g010250_1	11	3317228	3317653	-	426	protein_coding	NA && - && -	-
Solyc03g093560_1	87.5828536121472	105.660476321542	75.6175346875716	1239.62302007047	1011.34190539766	1174.96171694139	89.6202882070871	1141.97554746984	-3.66735288100356	3.75031426459917e-96	6.67453657800527e-94	Solyc03g093560_1	3	56373569	56374303	-	735	protein_coding	NA && sp|Q40478|ERF5_TOBAC Ethylene-responsive transcription factor 5 OS=Nicotiana tabacum OX=4097 GN=ERF5 PE=2 SV=1 && PF00847:AP2 domain	ERF
Solyc06g061215_1	831.383505930233	773.669487732183	929.574176417907	30.0281352687878	7.91347343816637	21.3994165862974	844.875723360107	19.7803417644172	5.40893411910283	1.0872499629184e-95	1.91757590306788e-93	Solyc06g061215_1	6	39327343	39328541	-	582	protein_coding	NA && sp|Q43502|IP23_SOLLC Proteinase inhibitor type-2 CEVI57 OS=Solanum lycopersicum OX=4081 GN=CEVI57 PE=2 SV=1 && -	-
Solyc03g083615_1	1911.13629822327	1776.27000749437	1831.76959027652	298.74144831512	375.889988312903	282.873538000118	1839.72529866472	319.168324876047	2.52898492381089	3.62136599705932e-95	6.32995376110984e-93	Solyc03g083615_1	3	55007997	55008536	+	540	protein_coding	NA && sp|P17407|21KD_DAUCA 21 kDa protein OS=Daucus carota OX=4039 PE=2 SV=1 && PF04043:Plant invertase/pectin methylesterase inhibitor	Nin-like
Solyc04g074450_2	8241.93868693415	8531.49646031832	8006.33242269616	3934.45567239758	3993.93004424257	3888.0065010229	8259.92252331621	3938.79740588768	1.06860523144223	4.63001395859787e-95	8.02139674933367e-93	Solyc04g074450_2	4	60517362	60524782	-	2601	protein_coding	NA && sp|O82161|PHI1_TOBAC Protein PHOSPHATE-INDUCED 1 OS=Nicotiana tabacum OX=4097 GN=PHI-1 PE=2 SV=1 && PF04674:Phosphate-induced protein 1 conserved region	MYB
Solyc01g087590_3	1151.64916466122	800.671609458799	962.167941369446	52.3567486737839	34.819283127932	57.5109320756742	971.496238496488	48.22898795913	4.32518877396462	1.430664681064e-94	2.45685284747279e-92	Solyc01g087590_3	1	82419257	82425146	+	2135	protein_coding	NA && sp|Q9FNA2|PAO1_ARATH Polyamine oxidase 1 OS=Arabidopsis thaliana OX=3702 GN=PAO1 PE=1 SV=1 && PF01593:Flavin containing amine oxidoreductase	bHLH
Solyc03g026270_2	2709.83963489524	3205.03444842012	3200.70771824118	642.140123440232	429.701607692434	506.898680387919	3038.52726718551	526.246803840195	2.52966520567242	1.75474617057646e-94	2.98718832881524e-92	Solyc03g026270_2	3	3737395	3744238	+	1596	protein_coding	NA && sp|Q9M0L0|DRE1A_ARATH Dehydration-responsive element-binding protein 1A OS=Arabidopsis thaliana OX=3702 GN=DREB1A PE=1 SV=2 && PF00847:AP2 domain	AP2
Solyc03g008010_3	1295.44190939758	1361.84613925544	1092.5430011756	122.422397634289	159.852163450961	127.727767749462	1249.94368327621	136.667442944904	3.19526734219033	2.20281327099936e-94	3.71762719020298e-92	Solyc03g008010_3	3	2470897	2478371	-	2465	protein_coding	NA && - && -	MYB_related
Solyc04g009590_3	660.13941901693	635.136863221716	782.250358836948	9.2394262365501	9.49616812579964	6.68731768321793	692.508880358531	8.47430401518922	6.36498763387159	8.04125530190315e-94	1.345501325174e-91	Solyc04g009590_3	4	2983331	2984838	+	568	nontranslating_CDS	NA && sp|Q9FFP8|DEF06_ARATH Defensin-like protein 6 OS=Arabidopsis thaliana OX=3702 GN=PDF2.5 PE=3 SV=1 && -	-
Solyc04g064880_3	1245.76805212502	1115.3050278385	1452.3781662406	120.112541075151	147.981953293711	103.653424089878	1271.15041540137	123.91597281958	3.36207033831452	1.08074138200328e-93	1.79302322334561e-91	Solyc04g064880_3	4	56050829	56052628	+	746	protein_coding	NA && sp|P16273|PRPX_HORVU Pathogen-related protein OS=Hordeum vulgare OX=4513 PE=2 SV=2 && -	MYB
Solyc05g052050_1	1478.45085724386	1520.33685373775	1578.84197425257	177.08900286721	121.076143603945	93.622447565051	1525.87656174473	130.595864678736	3.55069842188184	1.3166897517319e-93	2.16612061089541e-91	Solyc05g052050_1	5	63247063	63247767	+	705	protein_coding	NA && sp|Q40476|ERF1_TOBAC Ethylene-responsive transcription factor 1 OS=Nicotiana tabacum OX=4097 GN=ERF1 PE=2 SV=1 && PF00847:AP2 domain	ERF
Solyc02g072150_3	2491.53610425004	2625.0758339441	2534.49116263171	394.985471612517	569.770087547979	507.567412156241	2550.36770027528	490.774323772245	2.37764309133597	3.80071627445532e-93	6.20055187541766e-91	Solyc02g072150_3	2	41998514	42004874	-	5008	protein_coding	NA && sp|Q9LMI0|TPS7_ARATH Probable alpha,alpha-trehalose-phosphate synthase [UDP-forming] 7 OS=Arabidopsis thaliana OX=3702 GN=TPS7 PE=1 SV=1 && PF02358:Trehalose-phosphatase|PF00982:Glycosyltransferase family 20	-
Solyc01g010660_3	1036.61496887213	941.552244554189	1016.92546648803	103.943545161189	108.414586102879	120.371718297923	998.364226638117	110.909949853997	3.16791567069131	3.85886579924856e-93	6.24338973156108e-91	Solyc01g010660_3	1	5617546	5624172	+	1834	protein_coding	NA && sp|O49840|PBL3_ARATH Probable serine/threonine-protein kinase PBL3 OS=Arabidopsis thaliana OX=3702 GN=PBL3 PE=1 SV=1 && PF07714:Protein tyrosine kinase	bHLH
Solyc02g072210_1	1023.54290116882	1244.44561000928	1026.05172067446	46.9670833691297	42.7327565660984	83.5914710402241	1098.01341061752	57.7637703251507	4.23751779135049	3.62337281865323e-91	5.81432538285036e-89	Solyc02g072210_1	2	42093038	42093715	+	678	protein_coding	NA && - && -	-
Solyc08g007790_3	1206.5518490151	1398.24030332174	1589.27197903707	133.971680429976	135.320395792645	183.232504520171	1398.02137712464	150.841526914264	3.20846825682016	4.69677628201193e-91	7.47551132300387e-89	Solyc08g007790_3	8	2294232	2299405	-	2004	protein_coding	NA && sp|P54873|HMCS_ARATH Hydroxymethylglutaryl-CoA synthase OS=Arabidopsis thaliana OX=3702 GN=HMGS PE=1 SV=2 && PF01154:Hydroxymethylglutaryl-coenzyme A synthase N terminal|PF08540:Hydroxymethylglutaryl-coenzyme A synthase C terminal	TCP
Solyc01g109120_3	1300.6707364789	1657.69547295575	1684.44577269556	227.905847168236	211.289740799042	244.087095437454	1547.60399404341	227.760894468244	2.76342287785233	1.61032487497046e-90	2.54236532881425e-88	Solyc01g109120_3	1	96067219	96069299	-	1992	protein_coding	NA && sp|O48716|JGB_ARATH Protein JINGUBANG OS=Arabidopsis thaliana OX=3702 GN=JGB PE=1 SV=1 && -	Dof
Solyc08g078070_3	2388.26676939392	2576.94161695317	2885.20007351028	666.778593404366	529.41137301333	601.189859721292	2616.80281995246	599.126608712996	2.12657127433215	3.47303955694481e-88	5.43933563250469e-86	Solyc08g078070_3	8	62039190	62042139	+	791	protein_coding	NA && sp|Q05737|YPTM2_MAIZE GTP-binding protein YPTM2 OS=Zea mays OX=4577 GN=YPTM2 PE=2 SV=1 && PF00071:Ras family	NAC
Solyc04g011750_3	2124.21100178715	2371.4906907724	2145.97348440936	473.520594623193	479.556490352882	359.777691357124	2213.8917256563	437.618258777733	2.34115972762826	8.52797176054158e-88	1.32501669171526e-85	Solyc04g011750_3	4	4202802	4204122	+	696	protein_coding	NA && - && -	-
Solyc10g008350_3	1946.4308810222	2005.20103952438	1749.63330259864	460.431407454747	425.744870973351	398.564133919788	1900.42174104841	428.246804115962	2.15090300333875	1.1946764402156e-87	1.84158902914179e-85	Solyc10g008350_3	10	2473251	2474103	+	572	protein_coding	NA && - && -	-
Solyc07g064820_1	1082.3672058337	959.162323941113	972.597946153939	84.6947405017092	110.788628134329	72.2230309787536	1004.70915864292	89.235466538264	3.49800802853255	1.93672108605584e-87	2.9621241173215e-85	Solyc07g064820_1	7	66936441	66937913	-	1473	protein_coding	NA && sp|Q9ZVP5|M3K18_ARATH Mitogen-activated protein kinase kinase kinase 18 OS=Arabidopsis thaliana OX=3702 GN=MAPKKK18 PE=1 SV=1 && PF00069:Protein kinase domain	NF-YC
Solyc12g014430_2	1005.2420063842	873.459937591417	835.704133357473	63.1360792830923	74.3866503187639	87.6038616501548	904.802025777695	75.0421970840037	3.5876873641697	2.65853791348724e-87	4.03458889397982e-85	Solyc12g014430_2	12	5399613	5407831	-	2608	protein_coding	NA && sp|Q0WVN5|CSLG3_ARATH Cellulose synthase-like protein G3 OS=Arabidopsis thaliana OX=3702 GN=CSLG3 PE=2 SV=2 && PF03552:Cellulose synthase	ARF
Solyc01g097240_3	1683.68232018575	1480.42067379406	1657.06701013627	185.558476917381	112.371322821962	198.613335191572	1607.05666803869	165.514378310305	3.2755632912356	3.04976900842446e-87	4.5927175290712e-85	Solyc01g097240_3	1	88037596	88038180	-	475	protein_coding	NA && sp|P32045|PRP2_SOLLC Pathogenesis-related protein P2 OS=Solanum lycopersicum OX=4081 PE=2 SV=1 && PF00967:Barwin family	-
ENSRNA050029918	2332.05687826971	2727.21429438826	2376.73734026626	667.548545590745	673.436589587958	699.493429664595	2478.66950430807	680.159521614433	1.86571215381274	5.01297192381972e-87	7.49152300401669e-85	LSU_rRNA_eukarya	SL3.00SC0000016	130498	131772	-	1275	rRNA	Eukaryotic large subunit ribosomal RNA && - && -	-
Solyc11g007730_2	1001.3203860732	815.9336782608	1016.92546648803	86.2346448744676	97.3357232894463	94.9599111016945	944.726510274012	92.8434264218695	3.34621128445173	2.50890041047704e-86	3.72096540423553e-84	Solyc11g007730_2	11	1965451	1969004	-	1728	protein_coding	NA && sp|Q07469|BSPA_POPDE Bark storage protein A OS=Populus deltoides OX=3696 GN=BSPA PE=2 SV=1 && PF01048:Phosphorylase superfamily	-
Solyc09g091990_3	1701.98321497038	1901.88857378776	1951.71464529819	272.563073978228	194.671446578893	308.954076964668	1851.86214468544	258.729532507263	2.83663502560767	2.52955911602266e-86	3.72339690333652e-84	Solyc09g091990_3	9	71660409	71663231	+	2823	protein_coding	NA && sp|O48837|LRKS2_ARATH Receptor like protein kinase S.2 OS=Arabidopsis thaliana OX=3702 GN=LECRKS2 PE=2 SV=2 && PF00069:Protein kinase domain|PF07714:Protein tyrosine kinase	S1Fa-like
Solyc01g095150_3	5560.85760098618	5564.7850862679	5110.70234440139	1548.37384680852	1951.46254985183	1574.86331439782	5412.11501055182	1691.56657035272	1.67843913891576	6.44598679264548e-86	9.41739428653884e-84	Solyc01g095150_3	1	86400397	86401924	+	814	protein_coding	NA && sp|P46519|LEA14_SOYBN Desiccation protectant protein Lea14 homolog OS=Glycine max OX=3847 PE=2 SV=1 && PF03168:Late embryogenesis abundant protein	NAC
Solyc09g008830_3	75.8179926791722	137.358619218005	114.730052629419	1207.28502824255	1174.35945822389	1197.69859706433	109.302221508865	1193.11436117692	-3.44287556197575	4.83748712893593e-85	7.01507300171694e-83	Solyc09g008830_3	9	2256529	2257548	+	822	protein_coding	NA && - && -	Trihelix
Solyc12g056220_2	440.528681601397	563.522540381559	530.626493411063	2142.00698250686	2172.24845877667	2184.07795533897	511.559238464673	2166.1111322075	-2.08075967172225	6.79222870472249e-85	9.77731333473177e-83	Solyc12g056220_2	12	63128257	63130530	-	1369	protein_coding	NA && sp|Q08451|PIP1_SOLLC Probable aquaporin PIP-type pTOM75 OS=Solanum lycopersicum OX=4081 PE=2 SV=1 && PF00230:Major intrinsic protein	C3H
Solyc07g008130_3	819.618644997258	901.636064610495	655.786550824975	3172.2030078822	3087.0459882287	3097.56555086654	792.347086810909	3118.93818232581	-1.97551155246522	1.30431586407348e-83	1.86383880809975e-81	Solyc07g008130_3	7	2838582	2841238	-	1379	protein_coding	NA && - && PF02298:Plastocyanin-like domain	-
Solyc12g098850_2	67.9747520571888	136.184613925544	66.4912805011406	1348.95623053631	1217.8835621338	1369.56266152303	90.216882161291	1312.13415139772	-3.852481885231	1.03815783988484e-81	1.4727547848859e-79	Solyc12g098850_2	12	67213632	67215554	+	1431	protein_coding	NA && sp|Q9C5W0|DGAT3_ARATH Diacylglycerol O-acyltransferase 3 OS=Arabidopsis thaliana OX=3702 GN=DGAT3 PE=1 SV=2 && -	-
Solyc03g082520_1	593.471873730072	738.449328958335	654.482800226913	7.69952186379175	1.58269468763327	8.02478121986151	662.13466763844	5.76899925709551	6.81360436284118	1.43995951392385e-81	2.02806384202066e-79	Solyc03g082520_1	3	53884510	53884863	-	354	protein_coding	NA && sp|Q9ZUZ3|SAU32_ARATH Auxin-responsive protein SAUR32 OS=Arabidopsis thaliana OX=3702 GN=SAUR32 PE=2 SV=1 && PF02519:Auxin responsive protein	ZF-HD
Solyc12g009220_2	1590.87063949229	2231.78406096947	1856.54085163969	338.778962006837	329.991842371538	282.204806231796	1893.06518403381	316.99187020339	2.58001204049634	2.08106498860993e-81	2.91007209157262e-79	Solyc12g009220_2	12	2502493	2504654	+	858	protein_coding	NA && sp|Q9LMA8|TI10A_ARATH Protein TIFY 10A OS=Arabidopsis thaliana OX=3702 GN=TIFY10A PE=1 SV=1 && PF09425:Divergent CCT motif|PF06200:tify domain	-
Solyc07g005330_3	1530.73912805708	1857.27637267422	1805.69457831529	344.93857949787	322.869716277188	386.526962089996	1731.23669301553	351.445085955018	2.29926930219553	8.48066608308799e-80	1.177489361054e-77	Solyc07g005330_3	7	261295	264497	-	1585	protein_coding	NA && sp|P52409|E13B_WHEAT Glucan endo-1,3-beta-glucosidase OS=Triticum aestivum OX=4565 GN=GLC1 PE=2 SV=1 && PF07983:X8 domain|PF00332:Glycosyl hydrolases family 17	BES1
Solyc04g077980_1	4622.28313988884	5267.76174727512	4984.23853638942	1892.54247412001	2007.64821126281	1771.47045428443	4958.09447451779	1890.55371322242	1.39168202396168	1.3088245734553e-79	1.80442666722074e-77	Solyc04g077980_1	4	62935909	62936691	+	783	protein_coding	NA && sp|O22533|ZAT6_ARATH Zinc finger protein ZAT6 OS=Arabidopsis thaliana OX=3702 GN=ZAT6 PE=2 SV=1 && PF13912:C2H2-type zinc finger	C2H2
Solyc07g045350_3	1392.17521040204	948.596276308958	1132.95926971551	126.272158566185	138.485785167911	125.052840676175	1157.91025214217	129.936928136757	3.15593865622216	7.27547540947147e-79	9.9602784679177e-77	Solyc07g045350_3	7	58575885	58583088	-	2173	protein_coding	NA && sp|Q8S4Y1|THIC1_ARATH Acetyl-CoA acetyltransferase, cytosolic 1 OS=Arabidopsis thaliana OX=3702 GN=AAT1 PE=1 SV=1 && PF00108:Thiolase, N-terminal domain|PF02803:Thiolase, C-terminal domain	NF-YB
Solyc05g012580_1	1138.57709695791	1203.35542477312	1389.79813753364	208.657042508756	194.671446578893	165.845478543805	1243.91021975489	189.724655877151	2.71484256137924	9.24426040715471e-78	1.25677004160325e-75	Solyc05g012580_1	5	5800175	5800387	+	213	protein_coding	NA && sp|Q9ZQ80|NDRP1_ARATH Nodulin-related protein 1 OS=Arabidopsis thaliana OX=3702 GN=NRP1 PE=1 SV=1 && -	-
Solyc11g068440_2	1535.9679551384	1390.02226627451	1482.36442999602	247.924604014094	231.864771738275	308.954076964668	1469.45155046964	262.914484239012	2.47971904416318	5.45721369148421e-77	7.36799120263355e-75	Solyc11g068440_2	11	53464357	53470581	+	1865	protein_coding	NA && sp|Q9ZQG9|E1314_ARATH Glucan endo-1,3-beta-glucosidase 14 OS=Arabidopsis thaliana OX=3702 GN=At2g27500 PE=2 SV=2 && PF00332:Glycosyl hydrolases family 17	ERF
Solyc02g089610_2	6755.64458906831	6765.7925004561	6732.56808839	502.008825519222	667.105810837425	416.619891664477	6751.3350593048	528.578176007041	3.67583788338928	7.66274965066858e-77	1.02749075281602e-74	Solyc02g089610_2	2	52005578	52006969	-	1392	protein_coding	NA && sp|Q96471|DCAM_IPONI S-adenosylmethionine decarboxylase proenzyme OS=Ipomoea nil OX=35883 GN=SAMDC PE=3 SV=1 && PF01536:Adenosylmethionine decarboxylase	-
Solyc01g101210_3	1264.06894690965	1326.62598048159	1401.5318929162	265.633504300815	216.829172205759	202.625725801503	1330.74227343581	228.362800769359	2.54432904433913	1.16952095302664e-76	1.55753140798656e-74	Solyc01g101210_3	1	90903244	90914634	+	3570	protein_coding	NA && sp|G5CV45|TPS32_SOLLC Viridiflorene synthase OS=Solanum lycopersicum OX=4081 GN=TPS32 PE=1 SV=1 && PF03936:Terpene synthase family, metal binding domain|PF01397:Terpene synthase, N-terminal domain	GRAS
Solyc07g009090_3	91.5044739231388	105.660476321542	96.4775442565569	986.308750751723	921.919655546382	851.295541073642	97.8808315004127	919.841315790582	-3.23015722744669	1.18576253257151e-76	1.56849142568597e-74	Solyc07g009090_3	7	4040469	4041464	-	828	protein_coding	NA && - && -	-
Solyc04g040130_1	169.936880142972	186.666841501392	146.020066982897	1112.58090931791	1286.73078104585	1138.18146968369	167.541262875754	1179.16438668248	-2.8128729834474	1.54843772246045e-76	2.03448089212135e-74	Solyc04g040130_1	4	12036164	12037291	+	1128	protein_coding	NA && sp|Q8GZC3|FAD2_VERFO Delta(12)-fatty-acid desaturase FAD2 OS=Vernicia fordii OX=73154 GN=FAD2 PE=1 SV=1 && PF00487:Fatty acid desaturase|PF11960:Domain of unknown function (DUF3474)	HSF
Solyc05g008895_1	22.2225150956194	14.088063509539	23.4675107651084	657.539167167815	669.479852868875	708.8556744211	19.926029790089	678.624898152597	-5.10119037655072	2.60704528524893e-76	3.40254170328789e-74	Solyc05g008895_1	5	3109424	3109711	+	267	protein_coding	NA && sp|P82353|NLTP2_PRUAR Non-specific lipid-transfer protein 2 OS=Prunus armeniaca OX=36596 PE=1 SV=1 && -	bHLH
Solyc04g079730_1	786.938475738994	725.535270741258	938.700430604338	39.2675615053379	71.2212609434973	48.8174190874909	817.058059028196	53.1020805121087	3.94679811924728	1.32199552458985e-74	1.71395406522487e-72	AOS1	4	64179832	64181436	-	1605	protein_coding	NA && sp|K4BV52|AOS1_SOLLC Allene oxide synthase 1, chloroplastic OS=Solanum lycopersicum OX=4081 GN=AOS1 PE=2 SV=1 && PF00067:Cytochrome P450	C3H
Solyc01g109140_3	3639.26364860026	3506.75380858275	3580.0991422771	1218.06435885185	1107.88628134329	1362.87534383981	3575.37219982004	1229.60866134499	1.53884685576304	2.02618829474715e-74	2.60965054251743e-72	DES	1	96106946	96108624	+	1531	protein_coding	NA && sp|Q9FPM6|DES_SOLLC 9-divinyl ether synthase OS=Solanum lycopersicum OX=4081 GN=DES PE=1 SV=1 && PF00067:Cytochrome P450	-
Solyc02g084240_3	447.06471545305	552.956492749405	718.366579531931	2761.8184925421	3121.07392401282	2761.19347140068	572.795929244795	2881.36196265187	-2.33081351487421	2.89726677796116e-74	3.7071759288984e-72	Solyc02g084240_3	2	47952694	47953856	+	1032	protein_coding	NA && sp|P40267|H1_SOLPN Histone H1 OS=Solanum pennellii OX=28526 PE=2 SV=1 && PF00538:linker histone H1 and H5 family	BBR-BPC
Solyc02g080200_3	197.388222319914	221.887000275239	148.62756817902	1240.39297225685	1307.30581198508	1281.29006810455	189.300930258058	1276.32961744883	-2.75033523147321	1.00747123939429e-73	1.2807314580274e-71	Solyc02g080200_3	2	45033994	45044747	-	3310	protein_coding	NA && sp|Q1JPL7|PME18_ARATH Pectinesterase/pectinesterase inhibitor 18 OS=Arabidopsis thaliana OX=3702 GN=PME18 PE=1 SV=3 && PF01095:Pectinesterase|PF04043:Plant invertase/pectin methylesterase inhibitor	Trihelix
Solyc08g036640_3	1819.63182430013	2181.30183339362	2075.57095211404	26.1783743368919	7.91347343816637	17.3870259763666	2025.5015366026	17.1596245838083	6.88034743697691	1.18372099562083e-73	1.49507780201736e-71	Solyc08g036640_3	8	10547251	10548057	+	589	protein_coding	NA && sp|Q8LBM2|TIF5A_ARATH Protein TIFY 5A OS=Arabidopsis thaliana OX=3702 GN=TIFY5A PE=1 SV=1 && PF06200:tify domain|PF09425:Divergent CCT motif	-
Solyc04g080850_3	3257.55927166374	2539.3734475944	3311.52651907641	857.726735626401	802.42620663007	864.670176440078	3036.15307944485	841.607706232183	1.85029694048646	1.50090028971736e-71	1.87153662240743e-69	Solyc04g080850_3	4	65002212	65008992	-	5197	protein_coding	NA && sp|Q10RB4|BGAL5_ORYSJ Beta-galactosidase 5 OS=Oryza sativa subsp. japonica OX=39947 GN=Os03g0165400 PE=2 SV=1 && -	MYB_related
Solyc12g056960_2	1526.81750774609	1141.13314427266	1303.75059806158	198.647664085827	221.577256268658	234.724850680949	1323.90041669344	218.316590345145	2.59883094290542	1.55409305501662e-71	1.92559998342154e-69	Solyc12g056960_2	12	63989603	63995524	-	1809	protein_coding	NA && sp|Q12700|EXG_SCHOC Glucan 1,3-beta-glucosidase OS=Schwanniomyces occidentalis OX=27300 PE=3 SV=1 && PF00150:Cellulase (glycosyl hydrolase family 5)	-
Solyc02g063350_1	496.738572725611	477.820154031864	589.295270323834	16.9389481003419	23.7404203144991	13.3746353664359	521.28466569377	18.0180012604256	4.86655599452818	1.09741241208134e-70	1.35119765983122e-68	Solyc02g063350_1	2	35960084	35960521	+	438	protein_coding	NA && sp|Q0DJV6|CML18_ORYSJ Probable calcium-binding protein CML18 OS=Oryza sativa subsp. japonica OX=39947 GN=CML18 PE=2 SV=1 && PF13499:EF-hand domain pair	HSF
Solyc02g084850_3	2014.40563307938	2055.68326710023	2166.83349397835	0	0	4.01239060993076	2078.97413138599	1.33746353664359	10.4596286845738	3.07408877357552e-68	3.76133974501799e-66	TAS14	2	48563116	48564178	-	845	protein_coding	NA && sp|P22240|TAS14_SOLLC Abscisic acid and environmental stress-inducible protein TAS14 OS=Solanum lycopersicum OX=4081 GN=TAS14 PE=2 SV=1 && PF00257:Dehydrin	-
Solyc09g075890_3	2066.69390389261	1635.38937239898	1660.97826193045	376.506619139417	256.39653939659	270.836366170326	1787.68717940735	301.246508235444	2.56955594308434	1.69180533149819e-67	2.05717223445591e-65	Solyc09g075890_3	9	67954938	67957452	-	1017	protein_coding	NA && - && PF13419:Haloacid dehalogenase-like hydrolase	LBD
Solyc10g050990_1	130.720677033055	169.056762114468	112.122551433296	1030.96597756172	1002.63708461568	1126.81302962222	137.299996860273	1053.47203059987	-2.93570126899687	3.94645069575363e-67	4.76911514017092e-65	Solyc10g050990_1	10	51240511	51240720	+	210	protein_coding	NA && - && -	-
Solyc02g086880_3	2522.90906673797	2609.8137651421	2396.29359923718	563.605000429556	670.271200212691	434.675649409165	2509.67214370575	556.183950017138	2.17590624130436	4.59582605221957e-67	5.51978445547868e-65	Solyc02g086880_3	2	50122391	50126777	+	1397	protein_coding	NA && sp|Q07511|FDH_SOLTU Formate dehydrogenase, mitochondrial OS=Solanum tuberosum OX=4113 GN=FDH1 PE=1 SV=2 && PF02826:D-isomer specific 2-hydroxyacid dehydrogenase, NAD binding domain|PF00389:D-isomer specific 2-hydroxyacid dehydrogenase, catalytic domain	bHLH
Solyc08g029000_3	5678.50621031593	6037.90921912992	6195.42284198863	2947.37696945948	2678.71075881932	2686.96424511696	5970.61275714483	2771.01732446525	1.10764560408227	1.28334131828525e-66	1.53194957244332e-64	Solyc08g029000_3	8	38969588	38973709	-	2947	protein_coding	NA && sp|Q43191|LOX15_SOLTU Probable linoleate 9S-lipoxygenase 5 OS=Solanum tuberosum OX=4113 GN=LOX1.5 PE=2 SV=1 && PF01477:PLAT/LH2 domain|PF00305:Lipoxygenase	NF-YA
Solyc08g080290_3	717.656516911474	543.564450409713	787.465361229194	40.0375136917171	51.4375773480814	30.0929295744807	682.895442850127	40.5226735380931	4.08218318044609	1.83397488357311e-66	2.17598341186126e-64	Solyc08g080290_3	8	63728129	63729634	-	1222	protein_coding	NA && sp|Q9FJ90|ERF25_ARATH Ethylene-responsive transcription factor ERF025 OS=Arabidopsis thaliana OX=3702 GN=ERF025 PE=2 SV=1 && PF00847:AP2 domain	ERF
Solyc11g005380_2	1845.77595970674	1670.60953117283	1736.59579661802	533.576865160768	497.757479260665	525.623169900929	1750.9937624992	518.985838107454	1.75391345680015	2.50916519824028e-66	2.95915223409337e-64	Solyc11g005380_2	11	303996	306518	+	2379	protein_coding	NA && sp|Q9C6K3|DF1_ARATH Trihelix transcription factor DF1 OS=Arabidopsis thaliana OX=3702 GN=DF1 PE=4 SV=1 && PF13837:Myb/SANT-like DNA-binding domain	Trihelix
Solyc04g051820_3	1419.62655257898	1618.95329830452	1607.52448740993	318.760205160978	201.002225329426	262.811584950464	1548.70144609781	260.858005146956	2.56924838573193	4.3319091396737e-66	5.07819073217916e-64	Solyc04g051820_3	4	51068358	51071815	+	602	protein_coding	NA && - && -	-
Solyc01g057770_3	1815.71020398914	1751.61589635268	1675.31951850913	528.187199856114	513.584426136997	460.756188373715	1747.54853961698	500.842604788942	1.80391335127842	6.50656685928722e-66	7.58208686930154e-64	Solyc01g057770_3	1	63672035	63680464	+	7210	protein_coding	NA && sp|Q8VYR7|BOR1_ARATH Boron transporter 1 OS=Arabidopsis thaliana OX=3702 GN=BOR1 PE=1 SV=1 && -	HD-ZIP
Solyc10g076220_2	359.481861840903	410.901852361554	421.11144317389	1789.3688811452	1748.08628249095	1499.96535634578	397.165052458782	1679.14017332731	-2.07906118166316	1.20040611110258e-65	1.39055328029912e-63	Solyc10g076220_2	10	59140465	59155742	-	2797	protein_coding	NA && sp|A5H452|PER70_MAIZE Peroxidase 70 OS=Zea mays OX=4577 GN=PER70 PE=1 SV=1 && PF00141:Peroxidase	NAC
Solyc04g079210_3	818.311438226927	670.357021995563	706.632824149376	66.215888028609	47.4808406289982	32.099124879446	731.767094790622	48.5986178456844	3.9198178979354	7.83437823437783e-65	9.02197780555381e-63	Solyc04g079210_3	4	63838153	63866898	-	5128	protein_coding	NA && sp|O48723|PLP2_ARATH Patatin-like protein 2 OS=Arabidopsis thaliana OX=3702 GN=PLP2 PE=1 SV=1 && PF01734:Patatin-like phospholipase	-
Solyc08g076730_3	188.2377749276	88.0503969346187	134.286311600343	1303.52905153994	1210.76143603945	1329.43875542372	136.858161154187	1281.24308100104	-3.23245341274316	1.13694343981249e-64	1.30163401878416e-62	Solyc08g076730_3	8	60802405	60803887	-	1320	protein_coding	NA && - && -	-
Solyc12g009000_1	1810.48137690782	1704.65568465422	1676.62326910719	550.51581326111	514.375773480814	504.892485082953	1730.58677688974	523.261357274959	1.72595569756515	2.39965586137832e-64	2.73128272082577e-62	Solyc12g009000_1	12	2301110	2302564	+	1455	protein_coding	NA && - && PF13359:DDE superfamily endonuclease	SBP
Solyc01g109900_3	1099.360893848	1283.18778466051	1255.5118259333	3113.68664171738	3189.12979558105	3381.10782063498	1212.68683481394	3227.97475264447	-1.41201012492157	8.0753642870192e-64	9.13823159809104e-62	Solyc01g109900_3	1	96658163	96659737	+	674	protein_coding	NA && sp|Q84MD2|CIF1_ARATH Protein CASPARIAN STRIP INTEGRITY FACTOR 1 OS=Arabidopsis thaliana OX=3702 GN=CIF1 PE=1 SV=1 && -	-
Solyc01g102890_3	1134.65547664692	1212.74746711281	1110.79550954847	2868.07189426243	3273.80396136943	3313.56591203448	1152.7328177694	3151.81392255545	-1.45076545077449	1.16629627163212e-63	1.31221736262885e-61	Solyc01g102890_3	1	91443047	91444225	-	735	protein_coding	NA && sp|P92997|GL113_ARATH Germin-like protein subfamily 1 member 13 OS=Arabidopsis thaliana OX=3702 GN=GLP6 PE=2 SV=2 && PF00190:Cupin	E2F/DP
Solyc04g074950_3	1648.38773738683	1694.08963702206	1610.13198860605	405.764802221825	436.032386442967	323.666175867748	1650.86978767165	388.487788177513	2.0894681155285	1.18888663340125e-63	1.32999049269122e-61	Solyc04g074950_3	4	60922802	60926379	+	1149	protein_coding	NA && sp|Q94AC1|STR6_ARATH Rhodanese-like domain-containing protein 6 OS=Arabidopsis thaliana OX=3702 GN=STR6 PE=2 SV=1 && PF03959:Serine hydrolase (FSH1)	-
Solyc08g065610_3	62.7459249758666	96.2684339818497	75.6175346875716	721.445198637287	854.655131321968	882.725934184766	78.210631215096	819.608754714674	-3.38451040693845	1.52841718002541e-63	1.70010358712258e-61	Solyc08g065610_3	8	53811248	53817065	-	1975	protein_coding	NA && sp|Q39119|VPEG_ARATH Vacuolar-processing enzyme gamma-isozyme OS=Arabidopsis thaliana OX=3702 GN=At4g32940 PE=1 SV=2 && PF01650:Peptidase C13 family	-
Solyc12g088670_2	892.822224135769	934.508212799419	683.165313384268	2868.84184644881	2832.23214351974	2785.26781506027	836.831916773152	2828.78060167627	-1.7561259691715	6.58741604306443e-63	7.28597987994759e-61	Solyc12g088670_2	12	64929580	64934433	-	2483	protein_coding	NA && sp|P20721|CYSPL_SOLLC Low-temperature-induced cysteine proteinase (Fragment) OS=Solanum lycopersicum OX=4081 PE=2 SV=1 && PF00396:Granulin|PF00112:Papain family cysteine protease|PF08246:Cathepsin propeptide inhibitor domain (I29)	BBR-BPC
Solyc02g068680_1	1226.15995057006	1083.60688494204	1264.63808011973	187.09838129014	239.778245176441	166.514210312126	1191.46830521061	197.796945592902	2.59303907759868	1.34036765924405e-62	1.47417852050678e-60	Solyc02g068680_1	2	39192315	39193700	+	1386	protein_coding	NA && - && PF03107:C1 domain	bHLH
Solyc10g081170_2	3193.50613991755	2714.30023617118	3353.24653821438	1030.19602537534	1121.33918618817	1017.80975138577	3087.01763810104	1056.44832098309	1.54694523829612	4.8434881558036e-62	5.28951176631519e-60	Solyc10g081170_2	10	62425637	62430627	-	2089	protein_coding	NA && sp|P62200|CALM1_DAUCA Calmodulin-1/11/16 OS=Daucus carota OX=4039 GN=CAM-1 PE=2 SV=2 && PF13499:EF-hand domain pair	HSF
Solyc11g056250_1	2704.61080781392	2402.0148283764	2302.42355617675	475.83045118233	690.054883808107	633.288984600738	2469.68306412236	599.724773197058	2.04170160989744	4.86342196422708e-62	5.28951176631519e-60	Solyc11g056250_1	11	45588075	45588245	-	171	protein_coding	NA && - && -	-
Solyc07g005380_3	949.032115259983	814.759672968338	951.737936584953	81.6149317561925	31.6538937526655	69.5481039054664	905.176574937758	60.9389764714415	3.88828086444087	1.27036877080442e-61	1.37403366994686e-59	Solyc07g005380_3	7	290986	292561	+	869	protein_coding	NA && sp|A0A3G5BB24|NBS_NARPS Norbelladine synthase OS=Narcissus pseudonarcissus OX=39639 GN=NBS PE=1 SV=1 && PF00407:Pathogenesis-related protein Bet v I family	-
Solyc01g010080_3	104.576541626444	108.008486906466	83.4400382759411	817.689221934684	754.945366001072	831.90231979231	98.675022269617	801.512302576022	-3.02014291968785	1.48934163349346e-61	1.60202423950008e-59	Solyc01g010080_3	1	4736565	4747053	+	2136	protein_coding	NA && sp|P92960|KAT3_ARATH Potassium channel KAT3 OS=Arabidopsis thaliana OX=3702 GN=KAT3 PE=1 SV=1 && PF11834:KHA, dimerisation domain of potassium ion channel|PF00520:Ion transport protein|PF00027:Cyclic nucleotide-binding domain	bZIP
Solyc03g006490_3	1220.93112348874	1229.18354120728	1355.90062198404	251.004412759611	308.625464088488	290.229587451658	1268.67176222669	283.286488099919	2.16277425532031	3.01103415071516e-61	3.22114839172408e-59	Solyc03g006490_3	3	1074637	1077475	+	1155	protein_coding	NA && - && PF12481:Aluminium induced protein	NAC
Solyc04g082140_3	1479.75806401419	1597.82120304021	1724.86204123547	438.102794049751	463.729543476549	468.780969593577	1600.81376942996	456.871102373292	1.80867770177385	2.39641761369335e-60	2.5497101969171e-58	Solyc04g082140_3	4	66003841	66008652	-	1971	protein_coding	NA && sp|Q00624|ASOL_BRANA L-ascorbate oxidase homolog OS=Brassica napus OX=3708 GN=Bp10 PE=2 SV=1 && PF07731:Multicopper oxidase|PF00394:Multicopper oxidase|PF07732:Multicopper oxidase	bHLH
Solyc02g080220_3	95.4260942341305	35.2201587738475	75.6175346875716	1064.8438737624	1020.04672617965	845.276955158746	68.7545958985165	976.72251836693	-3.83771276436094	4.10585203238173e-60	4.34487920205066e-58	Solyc02g080220_3	2	45052132	45054042	+	1786	protein_coding	NA && sp|Q1JPL7|PME18_ARATH Pectinesterase/pectinesterase inhibitor 18 OS=Arabidopsis thaliana OX=3702 GN=PME18 PE=1 SV=3 && PF04043:Plant invertase/pectin methylesterase inhibitor|PF01095:Pectinesterase	NAC
Solyc03g083960_3	1270.6049807613	1570.8190813136	1019.53296768416	87.7745492472259	171.72237360821	119.702986529601	1286.98567658635	126.399969795012	3.34981950072211	5.60924081950872e-60	5.90387674857647e-58	Solyc03g083960_3	3	55324035	55328265	-	2211	protein_coding	NA && sp|O64896|TPPA_ARATH Trehalose-phosphate phosphatase A OS=Arabidopsis thaliana OX=3702 GN=TPPA PE=1 SV=1 && PF02358:Trehalose-phosphatase	-
Solyc07g007240_3	1120.27620217329	819.455694138184	913.929169241168	3629.55460659143	2968.34388665621	3244.01780812902	951.220355184212	3280.63876712555	-1.78716950938845	7.25784377099293e-60	7.59822500025287e-58	Solyc07g007240_3	7	1983929	1984935	+	513	protein_coding	NA && sp|P01075|MCPI_SOLTU Metallocarboxypeptidase inhibitor OS=Solanum tuberosum OX=4113 PE=1 SV=1 && -	-
Solyc04g016000_3	1464.07158277022	1694.08963702206	1430.21440607355	338.009009820458	382.220767063436	280.867342695153	1529.45854195528	333.699039859682	2.19877236713873	9.63883411608912e-60	1.00372050792913e-57	Solyc04g016000_3	4	6595218	6598734	-	1295	protein_coding	NA && sp|O22230|HSFB3_ARATH Heat stress transcription factor B-3 OS=Arabidopsis thaliana OX=3702 GN=HSFB3 PE=1 SV=1 && PF00447:HSF-type DNA-binding	HSF
Solyc09g009020_3	1537.27516190873	1496.85674788852	1379.36813274915	3393.9492375594	3372.72237934651	3584.40227820481	1471.1666808488	3450.35796503691	-1.22979113638089	1.25840257586568e-59	1.30347868929748e-57	PGH1	9	2370014	2374990	+	1861	protein_coding	NA && sp|P26300|ENO_SOLLC Enolase OS=Solanum lycopersicum OX=4081 GN=PGH1 PE=2 SV=1 && PF00113:Enolase, C-terminal TIM barrel domain|PF03952:Enolase, N-terminal domain	C3H
Solyc01g098910_3	1811.78858367815	1645.95542003114	1723.55829063741	530.497056415252	564.230656141262	488.174190874909	1727.10076478223	527.633967810474	1.7115055317518	6.80396732277864e-59	7.01059306726512e-57	Solyc01g098910_3	1	89152887	89157371	-	1673	protein_coding	NA && sp|B6ZJZ9|PNC1_SOYBN Peroxisomal adenine nucleotide carrier 1 OS=Glycine max OX=3847 GN=PNC1 PE=2 SV=1 && PF00153:Mitochondrial carrier protein	Dof
Solyc03g026220_3	1274.52660107229	1198.65940360328	1354.59687138598	258.703934623403	281.719654398723	327.009834709357	1275.92762535385	289.144474577161	2.13972970224695	4.55108523334956e-58	4.64044768819189e-56	Solyc03g026220_3	3	3655793	3657972	+	1903	protein_coding	NA && sp|Q0WUQ1|BAG1_ARATH BAG family molecular chaperone regulator 1 OS=Arabidopsis thaliana OX=3702 GN=BAG1 PE=1 SV=1 && PF02179:BAG domain	ERF
Solyc01g066520_3	1362.10945468444	1124.6970701782	1333.736861817	271.793121791849	184.383931109276	196.607139886607	1273.51446222654	217.594730929244	2.54951565889495	7.05971786238265e-58	7.16104127418991e-56	Solyc01g066520_3	1	74335277	74341774	-	2129	protein_coding	NA && sp|Q9M7Z1|ODB2_ARATH Lipoamide acyltransferase component of branched-chain alpha-keto acid dehydrogenase complex, mitochondrial OS=Arabidopsis thaliana OX=3702 GN=BCE2 PE=1 SV=1 && PF00364:Biotin-requiring enzyme|PF00198:2-oxoacid dehydrogenases acyltransferase (catalytic domain)|PF02817:e3 binding domain	MYB_related
Solyc07g066610_3	1411.783311957	1142.30714956512	1327.21810882669	3595.67671039075	3773.14413531773	3264.74849294699	1293.7695234496	3544.52311288515	-1.45469541522045	1.80439718802209e-57	1.82085998710868e-55	Solyc07g066610_3	7	68113060	68119347	-	2854	protein_coding	NA && sp|Q42961|PGKH_TOBAC Phosphoglycerate kinase, chloroplastic OS=Nicotiana tabacum OX=4097 PE=2 SV=1 && PF00162:Phosphoglycerate kinase	NAC
Solyc01g107590_3	418.306166505777	373.333683002783	337.671404897949	1479.0781500344	1399.10210386781	1453.15413256326	376.43708480217	1443.77812882182	-1.93957043417245	2.34677723595379e-57	2.35604399734705e-55	Solyc01g107590_3	1	94985426	94989323	+	1632	protein_coding	NA && sp|P30359|CADH1_TOBAC Probable cinnamyl alcohol dehydrogenase 1 OS=Nicotiana tabacum OX=4097 GN=CAD14 PE=1 SV=1 && PF08240:Alcohol dehydrogenase GroES-like domain|PF00107:Zinc-binding dehydrogenase	HB-other
Solyc03g020080_3	951.646528800644	965.032350403421	1056.03798442988	133.201728243597	121.867490947762	68.8793721371446	990.905621211315	107.982863776168	3.20348689623416	2.61773084632371e-57	2.61465901931017e-55	Solyc03g020080_3	3	62621519	62629075	+	1664	protein_coding	NA && sp|P61242|YCF2_SOLLC Protein Ycf2 OS=Solanum lycopersicum OX=4081 GN=ycf2-A PE=2 SV=2 && PF02428:Potato type II proteinase inhibitor family	-
Solyc02g083880_3	1045.76541626444	966.206355695882	968.686694359754	149.37072415756	93.3789865703632	155.814502018978	993.552822106693	132.8547375823	2.89933347506496	2.65370733812717e-57	2.6371385055084e-55	Solyc02g083880_3	2	47692654	47693313	+	485	protein_coding	NA && sp|F4IQJ4|GASAB_ARATH Gibberellin-regulated protein 11 OS=Arabidopsis thaliana OX=3702 GN=GASA11 PE=3 SV=1 && PF02704:Gibberellin regulated protein	-
ENSRNA050029735	1304.59235678989	1618.95329830452	1418.480650691	368.807097275625	362.43708346802	310.960272269634	1447.34210192847	347.401484337759	2.06046444826201	2.80707022456622e-57	2.77545524173399e-55	LSU_rRNA_eukarya	3	35364579	35365015	-	437	rRNA	Eukaryotic large subunit ribosomal RNA && sp|Q6CQE5|TAR1_KLULA Protein TAR1 OS=Kluyveromyces lactis (strain ATCC 8585 / CBS 2359 / DSM 70799 / NBRC 1267 / NRRL Y-1140 / WM37) OX=284590 GN=TAR1-A PE=4 SV=2 && -	-
Solyc04g014510_3	343.795380596936	198.406894426007	230.7638558569	1583.79164738196	1406.22422996216	1687.21025147588	257.655376959948	1559.07537627334	-2.60004850780142	3.42962650776283e-56	3.37395970565191e-54	Solyc04g014510_3	4	4780019	4784330	+	1499	protein_coding	NA && sp|P14656|GLN11_ORYSJ Glutamine synthetase cytosolic isozyme 1-1 OS=Oryza sativa subsp. japonica OX=39947 GN=GLN1-1 PE=1 SV=1 && PF00120:Glutamine synthetase, catalytic domain|PF03951:Glutamine synthetase, beta-Grasp domain	-
Solyc03g080190_3	1601.32829365493	1722.26576404114	1461.50442042703	436.562889676992	377.472683000536	465.437310751968	1595.03282604103	426.490961143165	1.90210146907921	4.03306790779057e-56	3.9477685215408e-54	Solyc03g080190_3	3	53506807	53511919	-	1655	protein_coding	NA && sp|Q9FLV0|DMR6_ARATH Protein DOWNY MILDEW RESISTANCE 6 OS=Arabidopsis thaliana OX=3702 GN=DMR6 PE=1 SV=1 && PF03171:2OG-Fe(II) oxygenase superfamily|PF14226:non-haem dioxygenase in morphine synthesis N-terminal	STAT
Solyc02g090490_3	1513.74544004278	1625.99733005929	1342.86311600343	300.281352687878	330.783189715354	213.325434094652	1494.20196203517	281.463325499295	2.41132890443679	5.50669705862745e-56	5.36341334909202e-54	Solyc02g090490_3	2	52653969	52656132	-	1507	protein_coding	NA && sp|O23181|PLP3_ARATH Patatin-like protein 3 OS=Arabidopsis thaliana OX=3702 GN=PLP3 PE=2 SV=2 && PF01734:Patatin-like phospholipase	-
Solyc02g077420_3	1313.74280418221	1586.0811501156	1268.54933191392	333.389296702183	310.999506119938	356.434032515515	1389.45776207057	333.607611779212	2.05791461896018	8.84253122141105e-56	8.56981355057248e-54	Solyc02g077420_3	2	42928352	42929949	-	1511	protein_coding	NA && sp|A2WT95|PLA1_ORYSI Phospholipase A1-II 1 OS=Oryza sativa subsp. indica OX=39946 GN=OsI_03083 PE=3 SV=2 && PF01764:Lipase (class 3)	Trihelix
Solyc03g083690_1	441.835888371727	414.423868238938	507.158982645955	26.1783743368919	22.1577256268658	12.0371718297923	454.47291308554	20.1244239311834	4.51082336175436	1.0436272625931e-55	1.00263038513894e-53	Solyc03g083690_1	3	55078030	55078299	+	270	protein_coding	NA && - && -	-
Solyc08g074705_1	800.010543442299	930.986196922035	694.899068766822	30.0281352687878	65.6818295367809	72.8917627470754	808.631936377052	56.2005758508814	3.84242122653449	1.04478009178293e-55	1.00263038513894e-53	Solyc08g074705_1	8	58977897	58980691	-	385	protein_coding	NA && - && -	-
Solyc01g088560_3	1040.53658918312	1035.47266795112	1118.61801313684	194.797903153931	214.455130174309	142.439866652542	1064.87575675702	183.897633326927	2.53703527724162	4.94567259571023e-55	4.70006953428249e-53	Solyc01g088560_3	1	83208469	83213794	-	961	protein_coding	NA && sp|O80501|RAH1B_ARATH Ras-related protein RABH1b OS=Arabidopsis thaliana OX=3702 GN=RABH1B PE=1 SV=1 && PF00071:Ras family	bHLH
Solyc01g067740_3	5583.0801160818	5311.1999430962	5752.14763864769	2410.7202955532	2157.21285924415	2670.91468267724	5548.80923260856	2412.9492791582	1.20065808852086	5.69669299232852e-55	5.3876405174307e-53	Solyc01g067740_3	1	76493970	76499506	+	1537	protein_coding	NA && sp|Q43779|SODC2_SOLLC Superoxide dismutase [Cu-Zn] 2 OS=Solanum lycopersicum OX=4081 GN=SODCC.5 PE=3 SV=3 && PF00080:Copper/zinc superoxide dismutase (SODC)	C2H2
Solyc03g034180_3	1103.28251415899	884.025985223571	1089.93549997948	184.788524731002	197.045488610343	213.994165862974	1025.74799978735	198.609393068106	2.36701911321002	1.11570282081247e-54	1.05010164053105e-52	Solyc03g034180_3	3	5906558	5912965	-	2898	protein_coding	NA && sp|Q41418|14331_SOLTU 14-3-3-like protein OS=Solanum tuberosum OX=4113 PE=2 SV=1 && PF00244:14-3-3 protein	E2F/DP
Solyc02g086300_3	1717.66969621435	1668.26152058791	1664.88951372464	520.487677992322	587.179729111945	578.452979598351	1683.60691017563	562.040128900872	1.58253715544614	5.83325489912378e-54	5.46400149091609e-52	Solyc02g086300_3	2	49632533	49634492	-	1584	protein_coding	NA && sp|Q8H0Z4|GT121_ARATH Putative glutamine amidotransferase GAT1_2.1 OS=Arabidopsis thaliana OX=3702 GN=GAT1_2.1 PE=2 SV=1 && PF07722:Peptidase C26	-
Solyc06g035700_1	777.78802834668	434.381958210785	654.482800226913	26.1783743368919	34.0279357841154	11.3684400614705	622.217595594793	23.8582500608259	4.71994198402185	1.72274271954956e-53	1.60600639145818e-51	Solyc06g035700_1	6	24829670	24830206	-	537	protein_coding	NA && sp|Q9FJ90|ERF25_ARATH Ethylene-responsive transcription factor ERF025 OS=Arabidopsis thaliana OX=3702 GN=ERF025 PE=2 SV=1 && PF00847:AP2 domain	ERF
Solyc05g010423_1	2241.8596111169	1771.57398632453	2104.25346527139	394.215519426138	383.803461751069	567.08453953688	2039.22902090427	448.367840238029	2.18286065982487	7.00140268268e-53	6.49604077340409e-51	Solyc05g010423_1	5	4655837	4658080	-	207	protein_coding	NA && - && -	-
Solyc04g057830_1	555.562877390486	542.390445117251	795.287864817564	38.4976093189587	13.4529048448828	37.4489790260204	631.0803957751	29.7998310632873	4.39561774583534	8.14578111054089e-53	7.52216777363486e-51	Solyc04g057830_1	4	54877661	54878281	+	621	protein_coding	NA && - && PF14009:Domain of unknown function (DUF4228)	SRS
Solyc03g115060_3	364.710688922225	358.071614200783	355.923913270811	3.0798087455167	6.3307787505331	5.34985414657434	359.56873879794	4.92014721420805	6.18955702365637	1.23177922801516e-52	1.13213811957056e-50	Solyc03g115060_3	3	66375290	66379842	-	2342	protein_coding	NA && - && -	-
Solyc09g018170_3	227.453978037517	261.803180218933	251.623865425885	1024.0364078843	1069.90160884009	1147.5437144402	246.960341227445	1080.4939103882	-2.12861348233672	4.60820566068799e-52	4.21564683267704e-50	Solyc09g018170_3	9	13399646	13407916	+	2476	protein_coding	NA && sp|Q9SCU5|WNK5_ARATH Probable serine/threonine-protein kinase WNK5 OS=Arabidopsis thaliana OX=3702 GN=WNK5 PE=1 SV=2 && PF00069:Protein kinase domain	MYB_related
Solyc12g099200_2	150.328778588014	164.360740944622	212.511347484038	949.351045805523	955.947591330498	1023.82833730066	175.733622338891	976.375658145562	-2.47519221918772	4.88845874839418e-52	4.45122590313083e-50	Solyc12g099200_2	12	67415386	67416878	+	598	protein_coding	NA && sp|F4HWQ8|CVIF1_ARATH Cell wall / vacuolar inhibitor of fructosidase 1 OS=Arabidopsis thaliana OX=3702 GN=C/VIF1 PE=1 SV=1 && PF04043:Plant invertase/pectin methylesterase inhibitor	LSD
Solyc12g099260_2	769.944787724697	774.843493024644	779.642857640825	90.8543579927426	126.615575010662	74.229226283719	774.810379463389	97.2330530957078	2.99920774999528	5.47914677693209e-52	4.96598409499997e-50	Solyc12g099260_2	12	67439261	67445854	-	2360	protein_coding	NA && sp|Q9C522|ACLB1_ARATH ATP-citrate synthase beta chain protein 1 OS=Arabidopsis thaliana OX=3702 GN=ACLB-1 PE=2 SV=1 && PF00549:CoA-ligase|PF00285:Citrate synthase, C-terminal domain	bZIP
Solyc10g011910_3	862.756468418166	1181.04932421635	1222.91806098176	177.08900286721	195.462793922709	212.65670232633	1088.90795120543	195.069499705417	2.48002217196951	3.52720696922919e-51	3.1821258450046e-49	Solyc10g011910_3	10	4174666	4176501	-	976	protein_coding	NA && sp|O04609|WRK22_ARATH WRKY transcription factor 22 OS=Arabidopsis thaliana OX=3702 GN=WRKY22 PE=2 SV=1 && PF03106:WRKY DNA -binding domain	WRKY
Solyc01g006950_3	1396.09683071303	1445.20051502021	1590.57572963513	290.271974264949	385.386156438702	399.901597456432	1477.29102512279	358.519909386694	2.04177499470523	3.77160098029166e-51	3.38700148583348e-49	Solyc01g006950_3	1	1515155	1517487	-	1563	protein_coding	NA && sp|Q9ZSD4|SY121_ARATH Syntaxin-121 OS=Arabidopsis thaliana OX=3702 GN=SYP121 PE=1 SV=1 && PF00804:Syntaxin|PF05739:SNARE domain	NAC
Solyc07g008930_1	1556.88326346369	1822.05621390038	1739.20329781415	377.276571325796	195.462793922709	291.567050988302	1706.04759172607	288.102138745602	2.56552225350255	4.00586817515963e-51	3.58095348242466e-49	Solyc07g008930_1	7	3936054	3936653	-	600	protein_coding	NA && - && PF14009:Domain of unknown function (DUF4228)	-
ENSRNA050030504	1137.26989018758	1229.18354120728	1022.14046888028	264.093599928057	266.684054866207	293.573246293267	1129.53130009171	274.783633695844	2.03879884619536	4.91241699180757e-51	4.3713812476644e-49	LSU_rRNA_eukarya	8	64844881	64845013	-	133	rRNA	Eukaryotic large subunit ribosomal RNA && - && -	-
Solyc08g074680_2	5390.92072084321	5407.46837707805	5557.88879953652	582.083852902656	329.991842371538	407.926378676293	5452.09263248592	440.000691316829	3.63128221375581	8.3777250221995e-51	7.42129967238008e-49	Solyc08g074680_2	8	58950489	58963139	-	5534	nontranslating_CDS	NA && sp|Q08303|PPOA_SOLLC Polyphenol oxidase A, chloroplastic OS=Solanum lycopersicum OX=4081 PE=1 SV=2 && PF00264:Common central domain of tyrosinase|PF12143:Protein of unknown function (DUF_B2219)|PF12142:Polyphenol oxidase middle domain	bZIP
Solyc10g086690_2	322.880072271647	466.080101107248	627.10403766762	20.0187568458585	21.3663782830492	13.3746353664359	472.021403682172	18.2532568317812	4.70185501570036	1.04734568372485e-50	9.2359848875141e-49	Solyc10g086690_2	10	65581571	65584923	+	1413	protein_coding	NA && sp|Q9M325|IPCS1_ARATH Phosphatidylinositol:ceramide inositolphosphotransferase 1 OS=Arabidopsis thaliana OX=3702 GN=IPCS1 PE=2 SV=1 && PF14360:PAP2 superfamily C-terminal	-
Solyc07g007870_3	1504.59499265047	1381.80422922728	1457.59316863285	427.323463440442	481.930532384332	457.412529532106	1447.99746350353	455.555508452293	1.66821504213956	1.38469223639678e-50	1.21561075838295e-48	OPR3	7	2548743	2553859	+	2019	protein_coding	NA && sp|Q9FEW9|OPR3_SOLLC 12-oxophytodienoate reductase 3 OS=Solanum lycopersicum OX=4081 GN=OPR3 PE=1 SV=1 && PF00724:NADH:flavin oxidoreductase / NADH oxidase family	NAC
Solyc06g009040_3	3030.10529362623	3023.06362808857	2767.86251968473	1072.54339562619	1176.73350025534	1288.64611755609	2940.34381379984	1179.30767114587	1.3174727667071	2.1580382923934e-50	1.88606766295472e-48	Solyc06g009040_3	6	2964329	2976278	+	1547	protein_coding	NA && sp|P46423|GSTF_HYOMU Glutathione S-transferase OS=Hyoscyamus muticus OX=35626 PE=1 SV=1 && PF02798:Glutathione S-transferase, N-terminal domain|PF00043:Glutathione S-transferase, C-terminal domain	CAMTA
Solyc04g074410_2	4753.0038169219	4883.86201664018	5217.60989344244	2426.11933928078	2520.44129005599	2198.12132247373	4951.49190900151	2381.5606506035	1.05641454323864	2.78681661933702e-50	2.42477817585604e-48	Solyc04g074410_2	4	60507541	60516683	+	1073	protein_coding	NA && sp|O82161|PHI1_TOBAC Protein PHOSPHATE-INDUCED 1 OS=Nicotiana tabacum OX=4097 GN=PHI-1 PE=2 SV=1 && PF04674:Phosphate-induced protein 1 conserved region	MYB
Solyc08g077680_3	1482.37247755485	1149.35118131989	1726.16579183353	296.431591755982	270.64079158529	331.690957087609	1452.62981690276	299.58778014296	2.27587165877094	3.26142605211352e-50	2.82517423992152e-48	Solyc08g077680_3	8	61704553	61712109	-	2938	protein_coding	NA && sp|F4KEW8|NET4A_ARATH Protein NETWORKED 4A OS=Arabidopsis thaliana OX=3702 GN=NET4A PE=2 SV=1 && PF07765:KIP1-like protein	bHLH
Solyc01g107170_2	2064.07949035195	2552.28750581148	2342.83982471666	726.064911755562	833.288753038919	658.032060028644	2319.73560696003	739.128574941042	1.65137857138251	3.96682880262948e-50	3.42108402947477e-48	Solyc01g107170_2	1	94682307	94683605	+	1299	protein_coding	NA && sp|Q96289|ZAT10_ARATH Zinc finger protein ZAT10 OS=Arabidopsis thaliana OX=3702 GN=ZAT10 PE=2 SV=1 && PF13912:C2H2-type zinc finger	C2H2
Solyc06g073300_1	2343.82173920268	2866.92092419118	2166.83349397835	816.149317561925	805.591596005336	837.252173938884	2459.1920524574	819.664362502049	1.58543260317616	4.03741687675237e-50	3.46668904369216e-48	Solyc06g073300_1	6	45301522	45301929	-	408	protein_coding	NA && sp|P41101|RL27_SOLTU 60S ribosomal protein L27 OS=Solanum tuberosum OX=4113 GN=RPL27 PE=2 SV=1 && PF01777:Ribosomal L27e protein family	GRAS
Solyc12g057060_2	1235.31039796237	1751.61589635268	1518.86944674174	358.027766666316	303.877380025589	369.13993611363	1501.9319136856	343.681694268511	2.12727094720511	4.68559804397331e-50	4.00567479942644e-48	Solyc12g057060_2	12	64076194	64078103	-	1738	protein_coding	NA && sp|F8WKW1|UGT2_GARJA 7-deoxyloganetin glucosyltransferase OS=Gardenia jasminoides OX=114476 GN=UGT85A24 PE=1 SV=1 && PF00201:UDP-glucoronosyl and UDP-glucosyl transferase	GRAS
Solyc11g017010_2	135.949504114378	84.5283810572339	129.071309208096	824.618791612096	917.171571483482	781.747437168176	116.516398126569	841.179266754585	-2.85643472894502	7.97818529430833e-50	6.79082319594235e-48	Solyc11g017010_2	11	7763510	7768034	+	2270	protein_coding	NA && sp|Q03411|SUT_SPIOL Sucrose transport protein OS=Spinacia oleracea OX=3562 PE=2 SV=1 && PF13347:MFS/sugar transport protein	HD-ZIP
Solyc10g086100_2	861.449261647836	826.499725892954	657.090301423036	2722.55093103676	2706.4079158529	2218.85200729171	781.679762987942	2549.27028472712	-1.70469590798338	9.06723435263726e-50	7.68438298361816e-48	Solyc10g086100_2	10	65172272	65173495	-	493	protein_coding	NA && sp|Q02214|ITR1_NICSY Trypsin inhibitor 1 OS=Nicotiana sylvestris OX=4096 PE=2 SV=1 && PF00280:Potato inhibitor I family	-
Solyc10g074890_2	281.049455621069	193.710873256161	192.955088513114	1083.3227262355	1225.79703557197	1148.21244620852	222.571805796781	1152.44406933866	-2.37414810625081	1.33239355269208e-49	1.12432192159711e-47	Solyc10g074890_2	10	58650044	58680780	-	6589	protein_coding	NA && sp|C0LGU1|Y5374_ARATH Probable LRR receptor-like serine/threonine-protein kinase At5g37450 OS=Arabidopsis thaliana OX=3702 GN=At5g37450 PE=1 SV=1 && PF11891:Protein RETICULATA-related	WRKY
Solyc02g092580_3	1392.17521040204	1346.58407045343	1325.91435822863	427.323463440442	443.945859881133	443.369162397348	1354.89121302803	438.212828572975	1.62832367869983	2.12929381128359e-49	1.78141815997858e-47	Solyc02g092580_3	2	54264276	54266995	-	1601	protein_coding	NA && sp|Q9SZE7|PER51_ARATH Peroxidase 51 OS=Arabidopsis thaliana OX=3702 GN=PER51 PE=2 SV=1 && PF00141:Peroxidase	NAC
Solyc02g070450_2	406.541305572803	363.94164066309	705.329073551315	20.0187568458585	5.53943140671646	10.6997082931487	491.937339929069	12.0859655152412	5.34688192264697	3.30736007002433e-49	2.75524204641984e-47	Solyc02g070450_2	2	40752374	40754842	-	1921	protein_coding	NA && sp|Q8L868|E1311_ARATH Glucan endo-1,3-beta-glucosidase 11 OS=Arabidopsis thaliana OX=3702 GN=At1g32860 PE=2 SV=1 && PF00332:Glycosyl hydrolases family 17	ERF
Solyc11g068940_1	749.029479399408	555.304503334328	550.182752381987	39.2675615053379	62.5164401615143	28.0867342695153	618.172245038574	43.2902453121225	3.84463454281216	3.38397330944309e-49	2.80712057114269e-47	Solyc11g068940_1	11	53787417	53788688	-	1272	protein_coding	NA && sp|Q9SF15|PUB24_ARATH E3 ubiquitin-protein ligase PUB24 OS=Arabidopsis thaliana OX=3702 GN=PUB24 PE=1 SV=1 && PF04564:U-box domain	Dof
Solyc04g048900_3	1652.30935769782	1208.05144594297	1440.64441085805	179.398859426348	218.411866893392	309.62280873299	1433.66840483295	235.81117835091	2.60078820642053	3.88979484699625e-49	3.19960141679183e-47	Solyc04g048900_3	4	38504741	38508764	+	2078	protein_coding	NA && sp|O04153|CALR3_ARATH Calreticulin-3 OS=Arabidopsis thaliana OX=3702 GN=CRT3 PE=1 SV=2 && PF00262:Calreticulin family	ERF
Solyc02g064980_1	414.384546194786	489.56020695648	408.073937193275	22.3286134049961	33.2365884402988	14.7120989030794	437.33956344818	23.4257669161248	4.23622933159381	4.25306797301741e-49	3.48377873254233e-47	Solyc02g064980_1	2	36673056	36674135	-	1080	protein_coding	NA && sp|Q9SND6|M3K20_ARATH Mitogen-activated protein kinase kinase kinase 20 OS=Arabidopsis thaliana OX=3702 GN=MAPKKK20 PE=1 SV=1 && PF00069:Protein kinase domain	NF-YC
Solyc03g119250_3	673.211486720236	597.568693862945	599.725275108327	1957.21845777586	1909.52114062955	1675.84181141441	623.501818563836	1847.52713660661	-1.56726000282801	1.01166551369294e-47	8.21799824131397e-46	Solyc03g119250_3	3	69374126	69377163	-	1932	protein_coding	NA && sp|Q9C9T2|SARD1_ARATH Protein SAR DEFICIENT 1 OS=Arabidopsis thaliana OX=3702 GN=SARD1 PE=1 SV=1 && PF07887:Calmodulin binding protein-like	HSF
Solyc04g081730_3	1226.15995057006	1141.13314427266	1127.74426732327	314.140492042703	351.358220654587	301.598027513128	1165.01245405533	322.36558007014	1.85449328091032	1.10581861759396e-47	8.94570705646153e-46	Solyc04g081730_3	4	65747838	65752734	-	3513	protein_coding	NA && - && -	-
Solyc03g118425_1	1169.95005944585	1339.54003869867	1119.9217637349	293.351783010466	238.195550488808	317.647589952851	1209.8039539598	283.064974484042	2.0942646966745	1.35769034274797e-47	1.09380674238589e-45	Solyc03g118425_1	3	68782434	68786923	+	4337	protein_coding	NA && sp|Q9SY59|NFXL1_ARATH NF-X1-type zinc finger protein NFXL1 OS=Arabidopsis thaliana OX=3702 GN=NFXL1 PE=1 SV=1 && PF01422:NF-X1 type zinc finger	NF-X1
Solyc12g099000_2	1671.91745925278	1645.95542003114	1675.31951850913	482.760020859743	518.332510199897	611.88956801444	1664.39746593102	537.66069969136	1.62879839510712	8.24759351700453e-47	6.61734173288515e-45	Solyc12g099000_2	12	67298171	67300163	-	1245	protein_coding	NA && sp|P43281|METK2_SOLLC S-adenosylmethionine synthase 2 OS=Solanum lycopersicum OX=4081 GN=SAM2 PE=2 SV=1 && PF00438:S-adenosylmethionine synthetase, N-terminal domain|PF02773:S-adenosylmethionine synthetase, C-terminal domain|PF02772:S-adenosylmethionine synthetase, central domain	-
Solyc03g007870_3	266.670181147433	294.675328407857	411.985188987459	1419.7918316832	1484.56761700001	1358.19422146156	324.443566180916	1420.85122338159	-2.13154555164434	1.52761166011182e-46	1.22065524367384e-44	Solyc03g007870_3	3	2399854	2401037	-	981	protein_coding	NA && sp|O03982|HIP39_ARATH Heavy metal-associated isoprenylated plant protein 39 OS=Arabidopsis thaliana OX=3702 GN=HIPP39 PE=2 SV=1 && PF00403:Heavy-metal-associated domain	SBP
Solyc06g082440_1	1304.59235678989	1162.26523953697	1234.65181636432	370.347001648383	313.373548151388	367.133740808664	1233.83647089706	350.284763536145	1.81547576878407	2.84645319343382e-46	2.26524447836805e-44	Solyc06g082440_1	6	48296596	48297855	-	1260	protein_coding	NA && sp|O22932|CIPKB_ARATH CBL-interacting serine/threonine-protein kinase 11 OS=Arabidopsis thaliana OX=3702 GN=CIPK11 PE=1 SV=1 && PF03822:NAF domain|PF00069:Protein kinase domain	bHLH
Solyc02g081810_3	2277.15419391583	2120.25355818562	2392.382347443	937.031810823456	804.008901317703	761.685484118522	2263.26336651481	834.242065419894	1.44024383449225	4.57715522280572e-46	3.62781246141164e-44	Solyc02g081810_3	2	46172475	46174238	+	1662	protein_coding	NA && sp|Q9LD90|CBF5_ARATH H/ACA ribonucleoprotein complex subunit 4 OS=Arabidopsis thaliana OX=3702 GN=CBF5 PE=1 SV=1 && PF16198:tRNA pseudouridylate synthase B C-terminal domain|PF01509:TruB family pseudouridylate synthase (N terminal domain)|PF08068:DKCLD (NUC011) domain|PF01472:PUA domain	WRKY
Solyc02g084800_3	1800.02372274517	1987.59096013746	1714.43203645098	3992.20208637602	3698.75748499896	4047.16466188349	1834.0155731112	3912.70807775282	-1.09266544385583	7.44123034542326e-46	5.87407122872384e-44	Solyc02g084800_3	2	48512300	48531783	-	2715	protein_coding	NA && sp|Q9FJZ9|PER72_ARATH Peroxidase 72 OS=Arabidopsis thaliana OX=3702 GN=PER72 PE=1 SV=1 && PF00141:Peroxidase	NAC
Solyc07g054780_1	227.453978037517	241.845090247086	219.030100474345	1209.59488480168	1048.53523055704	915.493790832534	229.443056252983	1057.87463539709	-2.20379516736349	7.77483816401707e-46	6.11277135489808e-44	Solyc07g054780_1	7	63110918	63111169	-	252	protein_coding	NA && - && -	Nin-like
Solyc03g113270_3	801.31775021263	1076.56285318727	1041.6967278512	2592.42901153868	2724.60890476068	2919.01416872462	973.192443750368	2745.350695008	-1.49551957582913	5.76432560676095e-45	4.51392809614237e-43	Solyc03g113270_3	3	64941909	64944213	+	1702	protein_coding	NA && sp|P46668|ATHB6_ARATH Homeobox-leucine zipper protein ATHB-6 OS=Arabidopsis thaliana OX=3702 GN=ATHB-6 PE=1 SV=1 && PF02183:Homeobox associated leucine zipper|PF00046:Homeodomain	HD-ZIP
Solyc07g040720_3	742.493445547755	899.288054025572	878.727903093505	186.32842910376	140.859827199361	157.151965555621	840.169800888944	161.446740619581	2.37991613963703	7.14944974846087e-45	5.57628596516408e-43	Solyc07g040720_3	7	49573122	49580506	+	2828	protein_coding	NA && sp|Q9CAI5|CKL2_ARATH Casein kinase 1-like protein 2 OS=Arabidopsis thaliana OX=3702 GN=CKL2 PE=1 SV=1 && PF00069:Protein kinase domain	C2H2
Solyc02g090930_3	711.120483059822	763.103440100028	728.796584316423	111.64306702498	94.9616812579964	56.1734685390306	734.340169158758	87.5927389406691	3.07329859205154	7.97605138497021e-45	6.19631579220483e-43	Solyc02g090930_3	2	53035823	53044670	-	3025	protein_coding	NA && sp|F4JFU8|OBL1_ARATH Triacylglycerol lipase OBL1 OS=Arabidopsis thaliana OX=3702 GN=OBL1 PE=1 SV=1 && PF01764:Lipase (class 3)	C2H2
Solyc08g079090_3	1035.3077621018	741.97134483572	662.305303815283	103.173592974809	124.241532979212	80.9165439669369	813.194803584267	102.777223306986	2.98729856301361	9.99040098507216e-45	7.73051699939754e-43	Solyc08g079090_3	8	62856357	62860553	+	2598	protein_coding	NA && sp|Q9SU40|SKU5_ARATH Monocopper oxidase-like protein SKU5 OS=Arabidopsis thaliana OX=3702 GN=SKU5 PE=1 SV=1 && PF07732:Multicopper oxidase|PF00394:Multicopper oxidase|PF07731:Multicopper oxidase	bHLH
Solyc10g086630_1	54.9026843538833	63.3962857929254	65.187529903079	495.849208028189	541.28158317058	683.443867224872	61.1621666832959	573.524886141214	-3.2289037998771	1.95034375879215e-44	1.50322361282968e-42	Solyc10g086630_1	10	65526847	65527098	+	252	protein_coding	NA && - && -	-
Solyc05g010810_2	844.455573633538	824.151715308031	873.512900701259	2283.67818480063	2207.85908924842	1958.04661764621	847.373396547609	2149.86129723175	-1.34310031152297	3.12250200519448e-44	2.39722438257617e-42	Solyc05g010810_2	5	4976917	4991108	-	4521	protein_coding	NA && sp|Q9SI52|P4KG7_ARATH Phosphatidylinositol 4-kinase gamma 7 OS=Arabidopsis thaliana OX=3702 GN=PI4KG7 PE=1 SV=2 && PF12854:PPR repeat|PF13041:PPR repeat family|PF00454:Phosphatidylinositol 3- and 4-kinase	bHLH
Solyc08g041860_1	478.437677940983	459.036069352479	486.298973076969	1328.93747369046	1485.35896434383	1535.40814006684	474.590906790144	1449.90152603371	-1.61182018412253	3.14732520633553e-44	2.40684318611057e-42	Solyc08g041860_1	8	25512336	25512836	+	501	protein_coding	NA && - && PF15365:Proline-rich nuclear receptor coactivator motif	-
Solyc01g079940_3	630.073663299327	618.700789127254	620.585284677312	1947.20907935293	1657.08133795204	1674.50434787777	623.119912367964	1759.59825506091	-1.49761248985961	3.36846016301878e-44	2.56592780589178e-42	Solyc01g079940_3	1	78950261	78952701	-	1826	protein_coding	NA && sp|P0DO21|GIP2_NICBE Probable aspartic proteinase GIP2 OS=Nicotiana benthamiana OX=4100 GN=GIP2 PE=1 SV=1 && PF14541:Xylanase inhibitor C-terminal|PF14543:Xylanase inhibitor N-terminal	FAR1
Solyc12g015860_2	759.487133562052	664.486995533255	837.007883955534	124.732254193426	109.205933446696	150.464647872403	753.660671016947	128.134278504175	2.55284354176273	7.26964218193046e-44	5.51619321688576e-42	Solyc12g015860_2	12	5832881	5837233	-	1397	protein_coding	NA && sp|Q4JHN6|FPS_PANGI Farnesyl pyrophosphate synthase OS=Panax ginseng OX=4054 GN=FPS PE=2 SV=1 && PF00348:Polyprenyl synthetase	-
Solyc09g074350_1	375.168343084869	359.245619493244	383.302675830105	22.3286134049961	28.4885043773989	33.4365884160896	372.572212802739	28.0845687328282	3.7242718533002	7.43111929692596e-44	5.61695067474592e-42	Solyc09g074350_1	9	66574068	66574577	-	510	protein_coding	NA && - && -	-
Solyc09g010690_3	2677.15946563698	2906.83710413488	2417.15360880617	1070.23353906705	1171.98541619244	1036.53424089878	2667.05005952601	1092.91773205276	1.28787909873066	8.3159424644069e-44	6.26158483175746e-42	Solyc09g010690_3	9	4016165	4020431	+	1843	protein_coding	NA && sp|Q94B55|XB31_ARATH Putative E3 ubiquitin-protein ligase XBAT31 OS=Arabidopsis thaliana OX=3702 GN=XBAT31 PE=2 SV=1 && PF13857:Ankyrin repeats (many copies)|PF12796:Ankyrin repeats (3 copies)	-
Solyc09g090430_3	2026.17049401236	2028.68114537361	1780.92331695212	666.778593404366	652.070211304909	777.735046558245	1945.25831877936	698.86128375584	1.47598927132806	8.43879410767246e-44	6.32974223164382e-42	Solyc09g090430_3	9	70425958	70430320	-	854	protein_coding	NA && sp|B7FKW7|CYNS_MEDTR Cyanate hydratase OS=Medicago truncatula OX=3880 GN=CYN PE=2 SV=1 && PF02560:Cyanate lyase C-terminal domain	-
Solyc10g076240_2	3185.66289929556	3820.21322166999	3886.48053282157	1670.02629225643	1512.26477403359	1534.07067653019	3630.78555126237	1572.12058094007	1.20783756256867	1.15369882613113e-43	8.62059615235465e-42	Solyc10g076240_2	10	59177450	59186771	-	2412	protein_coding	NA && sp|A5H452|PER70_MAIZE Peroxidase 70 OS=Zea mays OX=4577 GN=PER70 PE=1 SV=1 && PF00141:Peroxidase	NAC
ENSRNA050029920	593.471873730072	706.751186061872	753.567845679593	120.88249326153	110.788628134329	127.727767749462	684.596968490512	119.799629715107	2.5134899440865	1.51329011721494e-43	1.12645173478011e-41	LSU_rRNA_eukarya	SL3.00SC0000048	22076	23581	-	1506	rRNA	Eukaryotic large subunit ribosomal RNA && sp|Q8TGM7|ART2_YEAST Putative uncharacterized protein ART2 OS=Saccharomyces cerevisiae (strain ATCC 204508 / S288c) OX=559292 GN=ART2 PE=5 SV=1 && -	-
Solyc08g075370_3	2163.42720489707	2437.23498715024	2037.76218477025	873.125779353984	908.466750701499	809.834171437691	2212.80812560585	863.808900497725	1.35810489434943	1.58158755451156e-43	1.17283104373761e-41	Solyc08g075370_3	8	59628875	59631494	-	1024	protein_coding	NA && - && -	-
Solyc01g095140_3	2996.11791759763	3220.29651722212	3280.23650472294	50.0468921146464	110.788628134329	45.4737602458819	3165.5503131809	68.7697601649525	5.52729951849629	2.03436545668888e-43	1.50289707719239e-41	Solyc01g095140_3	1	86397518	86398199	+	590	protein_coding	NA && sp|P46519|LEA14_SOYBN Desiccation protectant protein Lea14 homolog OS=Glycine max OX=3847 PE=2 SV=1 && PF03168:Late embryogenesis abundant protein	NAC
Solyc10g081980_2	715.042103370813	706.751186061872	547.575251185864	2063.47185949619	2036.92806298402	1832.99377697003	656.456180206183	1977.79789981675	-1.59021273197977	2.07356352936577e-43	1.52609598550352e-41	Solyc10g081980_2	10	63017952	63023487	+	1124	protein_coding	NA && sp|Q9FNH6|NHL3_ARATH NDR1/HIN1-like protein 3 OS=Arabidopsis thaliana OX=3702 GN=NHL3 PE=1 SV=1 && PF03168:Late embryogenesis abundant protein	bZIP
Solyc02g092110_3	284.971075932061	324.025460719397	539.752747597494	16.9389481003419	15.0355995325161	9.3622447565051	382.916428082984	13.7789307964544	4.80707469950853	5.31934030525904e-43	3.90025187850397e-41	Solyc02g092110_3	2	53960693	53961812	+	632	protein_coding	NA && sp|Q9M2Y0|PSK3_ARATH Phytosulfokines 3 OS=Arabidopsis thaliana OX=3702 GN=PSK3 PE=2 SV=2 && -	-
Solyc01g099680_3	2439.24783343682	2228.26204509208	2218.98351790081	990.928463869998	1046.16118852559	1011.12243370255	2295.4977988099	1016.07069536605	1.17574257501249	7.7615379774316e-43	5.66968764866337e-41	Solyc01g099680_3	1	89726488	89728376	+	880	protein_coding	NA && sp|Q9SW70|SRP_VITRI Stress-related protein OS=Vitis riparia OX=96939 GN=SRP PE=2 SV=1 && PF05755:Rubber elongation factor protein (REF)	-
Solyc04g080960_3	1077.13837875238	943.900255139112	1116.01051194071	2445.36814394026	2776.83782945258	2470.96388394902	1045.68304861073	2564.38995244729	-1.29485480022763	8.68123689036586e-43	6.31793957630827e-41	Solyc04g080960_3	4	65102722	65105099	+	1368	protein_coding	NA && sp|P25804|CYSP_PEA Cysteine proteinase 15A OS=Pisum sativum OX=3888 PE=2 SV=1 && PF08246:Cathepsin propeptide inhibitor domain (I29)|PF00112:Papain family cysteine protease	BBR-BPC
Solyc08g036625_1	311.115211338672	353.375593030936	344.190157888257	6.1596174910334	3.16538937526655	0	336.226987419288	3.10833562209998	6.81566858633828	1.21533887289581e-42	8.8121070795116e-41	Solyc08g036625_1	8	10671485	10672687	+	628	protein_coding	NA && - && -	-
Solyc03g007770_3	1090.21044645568	1108.26099608373	1349.38186899374	336.469105447699	322.869716277188	280.867342695153	1182.61777051105	313.40205480668	1.91682646540114	1.35456730661424e-42	9.78537422936789e-41	Solyc03g007770_3	3	2317035	2321125	+	2793	protein_coding	NA && sp|Q9FLV9|SLAH3_ARATH S-type anion channel SLAH3 OS=Arabidopsis thaliana OX=3702 GN=SLAH3 PE=1 SV=1 && PF03595:Voltage-dependent anion channel	GRF
Solyc12g009160_2	351.638621218919	326.37347130432	260.750119612316	13.8591393548251	11.0788628134329	5.34985414657434	312.920737378518	10.0959521049441	4.97315368515922	1.53087333352435e-42	1.10183482538258e-40	Solyc12g009160_2	12	2466296	2472646	+	2301	protein_coding	NA && sp|A6X935|ITIH4_MOUSE Inter alpha-trypsin inhibitor, heavy chain 4 OS=Mus musculus OX=10090 GN=Itih4 PE=1 SV=2 && PF13768:von Willebrand factor type A domain	-
Solyc05g050560_1	490.202538873958	597.568693862945	601.029025706388	77.7651708242967	41.1500618784651	59.5171273806395	562.933419481097	59.4774533611338	3.24160773533144	1.81904998269948e-42	1.30445207001127e-40	Solyc05g050560_1	5	61560625	61562364	+	1740	protein_coding	NA && sp|A0A3Q7HES4|MTB2_SOLLC Transcription factor MTB2 OS=Solanum lycopersicum OX=4081 GN=MTB2 PE=2 SV=1 && PF00010:Helix-loop-helix DNA-binding domain|PF14215:bHLH-MYC and R2R3-MYB transcription factors N-terminal	bHLH
Solyc02g084650_3	1109.81854801064	545.912460994636	821.362876778795	93.1642145518802	66.4731768805975	95.6286428700163	825.697961928024	85.0886781008313	3.27571836340031	2.01674846990709e-42	1.44094470056099e-40	Solyc02g084650_3	2	48380404	48381860	+	864	protein_coding	NA && - && PF09791:Oxidoreductase-like protein, N-terminal	SRS
Solyc06g076300_3	305.88638425735	439.077979380632	359.835165064996	13.8591393548251	19.7836835954159	26.7492707328717	368.266509567659	20.1306978943709	4.18426245139314	2.65058586981461e-42	1.88692798448584e-40	Solyc06g076300_3	6	47544439	47548798	-	2565	protein_coding	NA && sp|Q9SNB8|SCL30_ARATH Scarecrow-like protein 30 OS=Arabidopsis thaliana OX=3702 GN=SCL30 PE=1 SV=1 && -	LBD
Solyc04g014720_3	2087.6092122179	2100.29546821377	2019.50967639739	923.172671468631	776.311744284121	807.159244364404	2069.13811894302	835.547886705718	1.30847084172226	3.82652042170202e-42	2.71419530056741e-40	Solyc04g014720_3	4	4983078	4985269	+	942	protein_coding	NA && sp|P34091|RL6_MESCR 60S ribosomal protein L6 OS=Mesembryanthemum crystallinum OX=3544 GN=RPL6 PE=2 SV=1 && PF01159:Ribosomal protein L6e|PF03868:Ribosomal protein L6, N-terminal domain	MYB_related
Solyc03g093120_3	4056.26260833571	3719.24876651829	3500.57035579534	1921.80065720242	1799.52385983903	1786.18255318751	3758.69391021645	1835.83569007632	1.03388918355699	5.09180672291289e-42	3.5856942523189e-40	Solyc03g093120_3	3	55712198	55720653	-	3960	protein_coding	NA && sp|Q38910|XTH23_ARATH Probable xyloglucan endotransglucosylase/hydrolase protein 23 OS=Arabidopsis thaliana OX=3702 GN=XTH23 PE=2 SV=1 && PF00722:Glycosyl hydrolases family 16|PF06955:Xyloglucan endo-transglycosylase (XET) C-terminus	NAC
Solyc12g100270_2	1036.61496887213	977.946408620498	1129.04801792133	2470.00661390439	2302.0294231626	2519.11257126819	1047.86979847132	2430.38286944506	-1.21454468354215	5.88145013664076e-42	4.12692291487513e-40	Solyc12g100270_2	12	68023915	68026963	+	2168	protein_coding	NA && sp|F4HVY0|CER1_ARATH Very-long-chain aldehyde decarbonylase CER1 OS=Arabidopsis thaliana OX=3702 GN=CER1 PE=1 SV=1 && PF04116:Fatty acid hydroxylase superfamily|PF12076:WAX2 C-terminal domain	FAR1
Solyc07g063475_1	1069.29513813039	1062.47478967773	1089.93549997948	325.689774838391	247.691718614607	290.89831921998	1073.90180926254	288.093270890993	1.89776522023765	8.4469333509577e-42	5.90591479327496e-40	Solyc07g063475_1	7	66091744	66094731	+	2495	protein_coding	NA && sp|Q9LK35|THE1_ARATH Receptor-like protein kinase THESEUS 1 OS=Arabidopsis thaliana OX=3702 GN=THE1 PE=1 SV=1 && PF12819:Malectin-like domain|PF07714:Protein tyrosine kinase	GRAS
Solyc07g042190_3	20.9153083252889	18.7840846793853	16.9487577748005	425.783559067684	338.696663153521	363.121350198733	18.8827169264916	375.867190806646	-4.31529564086058	9.02507469521828e-42	6.28768282235901e-40	Solyc07g042190_3	7	55338542	55339977	-	1328	protein_coding	NA && sp|Q8GYX2|FLZ14_ARATH FCS-Like Zinc finger 14 OS=Arabidopsis thaliana OX=3702 GN=FLZ14 PE=1 SV=1 && PF04570:zinc-finger of the FCS-type, C2-C2	ERF
Solyc09g010640_2	1201.32302193378	1494.50873730359	1539.72945631073	389.595806307863	318.912979558105	421.301014042729	1411.85373851603	376.603266636232	1.90535367234935	9.65150502797901e-42	6.70026645151579e-40	Solyc09g010640_2	9	3969591	3971704	-	2036	protein_coding	NA && - && -	WOX
Solyc06g051400_3	878.442949662133	797.149593581414	797.895366013687	166.309672257902	120.284796260129	180.557577446884	824.495969752411	155.717348654972	2.40178192076485	1.00679652739684e-41	6.9646839635505e-40	Solyc06g051400_3	6	34845188	34847723	+	1948	protein_coding	NA && sp|P48620|FAD3C_SESIN Omega-3 fatty acid desaturase, chloroplastic OS=Sesamum indicum OX=4182 GN=FAD7 PE=2 SV=1 && PF00487:Fatty acid desaturase|PF11960:Domain of unknown function (DUF3474)	HSF
Solyc09g059040_3	3597.43303194969	3008.97556457904	3278.93275412487	1345.8764217908	1418.09444011941	1561.48867903139	3295.1137835512	1441.81984698053	1.19161181286829	1.0329510375294e-41	7.12045157102574e-40	Solyc09g059040_3	9	53281695	53285465	-	1532	protein_coding	NA && sp|Q9SV68|QORH_ARATH Chloroplast envelope quinone oxidoreductase homolog OS=Arabidopsis thaliana OX=3702 GN=CEQORH PE=1 SV=1 && PF13602:Zinc-binding dehydrogenase|PF08240:Alcohol dehydrogenase GroES-like domain	HB-other
Solyc08g074710_1	278.435042080408	500.126254588634	269.876373798747	4.61971311827505	1.58269468763327	4.01239060993076	349.479223489263	3.40493280527969	6.66798797749956	1.51927851070142e-41	1.04361106680708e-39	Solyc08g074710_1	8	58978798	58979144	+	210	protein_coding	NA && - && -	-
Solyc10g006540_3	1390.86800363171	1910.10661083499	1685.74952329362	379.586427884933	518.332510199897	434.675649409165	1662.24137925344	444.198195831332	1.90468556741902	2.00679993702547e-41	1.37367560724292e-39	Solyc10g006540_3	10	1095309	1102401	+	3988	protein_coding	NA && sp|Q94B77|FH5_ARATH Formin-like protein 5 OS=Arabidopsis thaliana OX=3702 GN=FH5 PE=2 SV=2 && PF02181:Formin Homology 2 Domain	M-type_MADS
Solyc03g082660_3	1894.14261020897	1528.55489078498	1814.82083250172	467.360977132159	380.638072375802	567.08453953688	1745.83944449856	471.694529681614	1.88593472300931	2.06032102829275e-41	1.40539737877655e-39	Solyc03g082660_3	3	53996997	54002314	+	3292	protein_coding	NA && sp|Q1KKV8|MFSD5_TAKRU Molybdate-anion transporter OS=Takifugu rubripes OX=31033 GN=mfsd5 PE=3 SV=1 && PF05631:Sugar-tranasporters, 12 TM	-
Solyc01g109720_3	620.923215907014	780.713519486952	687.076565178453	136.281536989114	88.6309025074633	102.315960553234	696.237766857473	109.076133349937	2.67501154694187	8.15412208569037e-41	5.54282111359585e-39	Solyc01g109720_3	1	96519271	96521952	-	1897	protein_coding	NA && - && PF00561:alpha/beta hydrolase fold	FAR1
Solyc01g099370_3	2179.11368614103	2110.86151584592	2328.49856813798	830.77840910313	829.332016319836	987.048090042966	2206.15792337498	882.386171821977	1.32087370264623	2.13681363583204e-40	1.44748790825895e-38	Solyc01g099370_3	1	89536647	89537483	+	837	protein_coding	NA && sp|O04023|SRC2_ARATH Protein SRC2 homolog OS=Arabidopsis thaliana OX=3702 GN=SRC2 PE=1 SV=1 && PF00168:C2 domain	-
Solyc02g083730_3	33.9873760285944	44.6122011135401	15.645007176739	489.689590537155	423.370828941901	487.505459106587	31.4148614396245	466.855292861881	-3.88326065155111	2.98468802866682e-40	2.0148702599038e-38	Solyc02g083730_3	2	47582654	47584250	-	1261	protein_coding	NA && sp|Q9FKW8|STR18_ARATH Thiosulfate sulfurtransferase 18 OS=Arabidopsis thaliana OX=3702 GN=STR18 PE=1 SV=1 && PF00581:Rhodanese-like domain	-
Solyc01g007010_3	1671.91745925278	1267.92571585851	1391.10188813171	276.412834910124	422.579481598084	311.629004037955	1443.64835441433	336.873773515388	2.10011956015612	3.49206849634833e-40	2.34928608085949e-38	Solyc01g007010_3	1	1567452	1572335	+	2391	protein_coding	NA && sp|Q9SVC6|PUB22_ARATH E3 ubiquitin-protein ligase PUB22 OS=Arabidopsis thaliana OX=3702 GN=PUB22 PE=1 SV=1 && PF04564:U-box domain	Dof
Solyc07g056410_3	609.158354974039	625.744820882023	644.05279544242	69.2956967741257	52.228924691898	104.3221558582	626.318657099494	75.2822591080745	3.04959368703004	5.7121205706683e-40	3.82966384972511e-38	Solyc07g056410_3	7	64399436	64408112	-	7968	protein_coding	NA && sp|Q9SHI2|Y1723_ARATH Leucine-rich repeat receptor-like serine/threonine-protein kinase At1g17230 OS=Arabidopsis thaliana OX=3702 GN=At1g17230 PE=1 SV=2 && PF08263:Leucine rich repeat N-terminal domain|PF00069:Protein kinase domain	MYB_related
Solyc07g005100_3	422.227786816769	576.436598598637	486.298973076969	1623.0592088873	1468.74067012368	1630.36805116853	494.987786164125	1574.0559767265	-1.6674610531246	5.90460658886963e-40	3.94520420444713e-38	Solyc07g005100_3	7	123931	126332	+	1350	protein_coding	NA && sp|O81862|CHIC_ARATH Class V chitinase OS=Arabidopsis thaliana OX=3702 GN=ChiC PE=1 SV=1 && PF00704:Glycosyl hydrolases family 18	ARR-B
Solyc02g068430_3	1431.39141351196	1282.01377936805	1419.78440128906	348.018388243387	344.236094560237	468.780969593577	1377.72986472302	387.011817465734	1.8295434646338	1.11088514080444e-39	7.39721034065593e-38	Solyc02g068430_3	2	38947778	38956749	-	1347	protein_coding	NA && sp|F4JJE0|CCT2_ARATH Choline-phosphate cytidylyltransferase 2 OS=Arabidopsis thaliana OX=3702 GN=CCT2 PE=1 SV=1 && PF01467:Cytidylyltransferase-like	FAR1
Solyc07g054830_3	950.339322030313	1017.86258856419	887.854157279936	257.164030250644	177.261805014927	185.238699825137	952.01868929148	206.554845030236	2.20552778149097	1.58160640260904e-39	1.04959689979245e-37	Solyc07g054830_3	7	63121775	63138309	-	3146	protein_coding	NA && sp|Q9C5E5|DGK5_ARATH Diacylglycerol kinase 5 OS=Arabidopsis thaliana OX=3702 GN=DGK5 PE=2 SV=1 && PF00781:Diacylglycerol kinase catalytic domain|PF00609:Diacylglycerol kinase accessory domain	-
Solyc01g081600_3	450.986335764041	490.734212248941	400.251433604905	55.4365574193006	30.0711990650322	44.8050284775601	447.323993872629	43.4375949872976	3.36268404776899	1.9930961223377e-39	1.31376575040421e-37	Solyc01g081600_3	1	80646780	80647809	-	414	protein_coding	NA && sp|Q9LLR6|NLTP4_ARATH Non-specific lipid-transfer protein 4 OS=Arabidopsis thaliana OX=3702 GN=LTP4 PE=3 SV=1 && PF00234:Protease inhibitor/seed storage/LTP family	ARF
Solyc03g114360_3	1594.79225980328	1251.48964176405	1624.47324518473	480.450164300605	454.23337535075	486.167995569943	1490.25171558402	473.617178407099	1.65283844172624	2.0163206592267e-39	1.3246144142846e-37	Solyc03g114360_3	3	65852413	65855041	-	2255	protein_coding	NA && sp|Q9FJJ3|SRO5_ARATH Probable inactive poly [ADP-ribose] polymerase SRO5 OS=Arabidopsis thaliana OX=3702 GN=SRO5 PE=1 SV=1 && PF12174:RCD1-SRO-TAF4 (RST) plant domain	NAC
Solyc01g099620_3	287.585489472722	176.100793869237	284.217630377424	1335.86704336787	1137.16613306451	1107.41980834089	249.301304573128	1193.48432825775	-2.26226675342727	2.73456107068666e-39	1.79045157460979e-37	Solyc01g099620_3	1	89679425	89683661	-	2983	protein_coding	NA && sp|Q948T9|RBOHB_SOLTU Respiratory burst oxidase homolog protein B OS=Solanum tuberosum OX=4113 GN=RBOHB PE=1 SV=1 && PF01794:Ferric reductase like transmembrane component|PF08022:FAD-binding domain|PF08030:Ferric reductase NAD binding domain|PF08414:Respiratory burst NADPH oxidase	bHLH
Solyc04g054950_3	867.985295499488	684.445085505102	851.349140534212	121.65244544791	45.8981459413649	60.8545909172831	801.259840512934	76.1350607688526	3.39684025577466	5.7720545013285e-39	3.76665036575027e-37	Solyc04g054950_3	4	53423081	53424590	-	1040	protein_coding	NA && sp|P50165|TRNH_DATST Tropinone reductase homolog OS=Datura stramonium OX=4076 PE=2 SV=1 && PF13561:Enoyl-(Acyl carrier protein) reductase	C2H2
Solyc03g119080_3	164.70805306165	109.182492198927	185.132584924744	1000.93784229293	826.166626944569	811.171634974334	153.007710061774	879.42536807061	-2.52667981506097	6.83674902593264e-39	4.44661248108582e-37	Solyc03g119080_3	3	69264228	69280854	-	8039	protein_coding	NA && sp|Q9LV35|AIP12_ARATH Actin-interacting protein 1-2 OS=Arabidopsis thaliana OX=3702 GN=AIP1-2 PE=2 SV=1 && -	C2H2
Solyc03g098710_1	981.712284518247	837.065773525108	687.076565178453	3.0798087455167	0	0	835.284874407269	1.02660291517223	9.72466951581717	7.06123827366945e-39	4.57741263853069e-37	Solyc03g098710_1	3	62423407	62424081	-	675	protein_coding	NA && sp|P20347|CPI1_SOLTU Cysteine protease inhibitor 1 OS=Solanum tuberosum OX=4113 PE=1 SV=3 && PF00197:Trypsin and protease inhibitor	-
Solyc08g008290_3	112.419782248428	132.662598048159	149.931318777082	736.84424236487	641.782695835293	706.180747347813	131.671233024556	694.935895182659	-2.39986330708394	8.98474458476442e-39	5.80509388567436e-37	Solyc08g008290_3	8	2714616	2715695	+	1080	protein_coding	NA && - && -	-
Solyc02g071560_3	223.532357726525	345.157555983705	209.903846287914	1260.41172910271	1109.46897603092	1238.49123493196	259.531253332715	1202.79064668853	-2.20901444459956	2.17505659803256e-38	1.40069352038433e-36	Solyc02g071560_3	2	41533833	41537474	-	3107	protein_coding	NA && sp|Q9FK76|SBT56_ARATH Subtilisin-like protease SBT5.6 OS=Arabidopsis thaliana OX=3702 GN=SBT5.6 PE=2 SV=1 && PF17766:Fibronectin type-III domain|PF00082:Subtilase family|PF05922:Peptidase inhibitor I9	DBB
Solyc02g092120_3	445.757508682719	300.545354870165	342.886407290196	22.3286134049961	32.4452410964821	18.7244895130102	363.063090281027	24.4994480048295	3.8966271828246	2.27537099073196e-38	1.46048976673966e-36	Solyc02g092120_3	2	53963296	53964278	+	900	protein_coding	NA && sp|Q9M2Y0|PSK3_ARATH Phytosulfokines 3 OS=Arabidopsis thaliana OX=3702 GN=PSK3 PE=2 SV=2 && -	-
Solyc06g054420_3	239.218838970492	322.851455426935	286.825131573548	1334.32713899511	986.810137739346	1449.14174195332	282.965141990325	1256.75967289593	-2.14996640411109	2.42481368574993e-38	1.55132606293877e-36	Solyc06g054420_3	6	37313117	37317988	+	1660	protein_coding	NA && sp|A4FUZ5|SERC3_BOVIN Serine incorporator 3 OS=Bos taurus OX=9913 GN=SERINC3 PE=2 SV=1 && PF03348:Serine incorporator (Serinc)	NAC
Solyc06g005560_3	39.2162031099166	23.4801058492316	26.0750119612316	476.600403368709	351.358220654587	401.239060993076	29.5904403067933	409.732561672124	-3.79712185855597	2.84579042961278e-38	1.81472440522897e-36	Solyc06g005560_3	6	586970	595641	-	6662	protein_coding	NA && sp|Q38865|EXPA6_ARATH Expansin-A6 OS=Arabidopsis thaliana OX=3702 GN=EXPA6 PE=2 SV=2 && -	bZIP
Solyc06g068450_2	40.5234098802472	32.8721481889243	19.5562589709237	381.896284444071	432.075649723884	407.926378676293	30.9839390133651	407.299437614749	-3.71508279373728	2.85848295120066e-38	1.81690002388491e-36	Solyc06g068450_2	6	42534650	42536002	-	1353	protein_coding	NA && sp|Q8W1D5|CIPKP_ARATH CBL-interacting serine/threonine-protein kinase 25 OS=Arabidopsis thaliana OX=3702 GN=CIPK25 PE=2 SV=1 && PF03822:NAF domain|PF00069:Protein kinase domain	YABBY
Solyc01g028860_3	1631.39404937253	1454.5925573599	1690.96452568587	3385.47976350923	3636.24104483745	3147.72043349068	1592.31704413943	3389.81374727912	-1.09045388142281	4.06860624164741e-38	2.57770564377771e-36	Solyc01g028860_3	1	40991055	40995946	+	3236	protein_coding	NA && sp|Q9LJE5|ECT2_ARATH YTH domain-containing protein ECT2 OS=Arabidopsis thaliana OX=3702 GN=ECT2 PE=1 SV=1 && PF04146:YT521-B-like domain	C3H
Solyc04g074830_1	890.207810595108	1028.42863619635	1076.89799399887	228.675799354615	273.806180960556	183.232504520171	998.51148026344	228.571494945114	2.12970938959318	1.34295202011341e-37	8.48095861218074e-36	Solyc04g074830_1	4	60833678	60834694	+	1017	protein_coding	NA && sp|Q8H0W9|CAP17_ARATH Putative clathrin assembly protein At5g10410 OS=Arabidopsis thaliana OX=3702 GN=At5g10410 PE=2 SV=2 && PF07651:ANTH domain	NAC
Solyc09g083360_3	244.447666051814	436.729968795709	303.773889348348	10.7793306093084	2.37404203144991	13.3746353664359	328.317174731957	8.8426693357314	5.19228669328079	1.77900136787552e-37	1.11985561990029e-35	Solyc09g083360_3	9	69446701	69450206	+	2574	protein_coding	NA && sp|Q08112|RS151_ARATH 40S ribosomal protein S15-1 OS=Arabidopsis thaliana OX=3702 GN=RPS15A PE=2 SV=1 && -	bHLH
Solyc04g054690_3	1749.04265870228	1688.21961055976	1956.92964769043	3608.76589755919	3593.50828827135	4158.17413542491	1798.06397231749	3786.81610708515	-1.07522340230953	2.12577183960878e-37	1.3338536956417e-35	Solyc04g054690_3	4	52991192	52993750	-	2137	protein_coding	NA && sp|P24792|ASO_CUCMA L-ascorbate oxidase OS=Cucurbita maxima OX=3661 GN=AAO PE=1 SV=2 && PF07731:Multicopper oxidase|PF00394:Multicopper oxidase|PF07732:Multicopper oxidase	bHLH
Solyc10g005950_3	427.456613898091	422.64190528617	383.302675830105	22.3286134049961	42.7327565660984	44.8050284775601	411.133731671455	36.6221328162182	3.48478930673275	2.61694355969544e-37	1.63158930153368e-35	Solyc10g005950_3	10	725096	731696	+	1573	protein_coding	NA && sp|Q94B74|NUDT2_ARATH Nudix hydrolase 2 OS=Arabidopsis thaliana OX=3702 GN=NUDT2 PE=1 SV=1 && PF00293:NUDIX domain|PF18290:Nudix hydrolase domain	C3H
Solyc02g091250_1	333.337726434291	365.115645955552	271.180124396809	21.5586612186169	11.0788628134329	23.4056118912627	323.211165595551	18.6810453077709	4.10372471845793	3.30348734448585e-37	2.05309116644443e-35	Solyc02g091250_1	2	53248152	53248544	-	393	protein_coding	NA && - && -	-
Solyc02g079190_3	869.292502269819	1031.95065207373	938.700430604338	2542.38211942404	2120.01953408477	2271.01308522081	946.647861649296	2311.1382462432	-1.28692867878339	4.76472136955639e-37	2.95186551429764e-35	Solyc02g079190_3	2	44356862	44362751	+	3505	protein_coding	NA && sp|Q570C0|TIR1_ARATH Protein TRANSPORT INHIBITOR RESPONSE 1 OS=Arabidopsis thaliana OX=3702 GN=TIR1 PE=1 SV=2 && PF18791:Transport inhibitor response 1 protein domain|PF18511:F-box	FAR1
Solyc08g016440_3	350.331414448589	311.111402502319	337.671404897949	34.6478483870629	23.7404203144991	20.7306848179756	333.038073949619	26.3729845065125	3.66339527278694	7.07241032281023e-37	4.36771535929514e-35	Solyc08g016440_3	8	7578273	7580889	+	989	nontranslating_CDS	NA && - && -	-
Solyc01g007040_3	562.098911242138	568.218561551406	655.786550824975	99.3238320429136	65.6818295367809	106.328351163165	595.36800787284	90.4446709142865	2.71502769140789	7.11987168607409e-37	4.38319899365637e-35	Solyc01g007040_3	1	1582775	1583263	-	489	protein_coding	NA && sp|Q9SVC6|PUB22_ARATH E3 ubiquitin-protein ligase PUB22 OS=Arabidopsis thaliana OX=3702 GN=PUB22 PE=1 SV=1 && PF04564:U-box domain	Dof
Solyc08g005090_1	456.215162845364	353.375593030936	365.050167457242	40.8074658780963	34.819283127932	48.1486873191691	391.546974444514	41.2584787750658	3.24167521490562	1.27692866830134e-36	7.83649922863178e-35	Solyc08g005090_1	8	62425	63249	-	825	protein_coding	NA && - && -	-
Solyc03g093080_3	1930.74439977823	1726.96178521099	1920.42463094471	547.436004515593	603.006675988277	757.004361740269	1859.37693864464	635.815680748047	1.54650415026594	1.29777459373567e-36	7.93954163173848e-35	Solyc03g093080_3	3	55695515	55696772	-	1077	protein_coding	NA && sp|Q38910|XTH23_ARATH Probable xyloglucan endotransglucosylase/hydrolase protein 23 OS=Arabidopsis thaliana OX=3702 GN=XTH23 PE=2 SV=1 && PF00722:Glycosyl hydrolases family 16|PF06955:Xyloglucan endo-transglycosylase (XET) C-terminus	NAC
Solyc07g007325_1	71.8963723681805	39.9161799436938	80.832537079818	509.708347383014	621.20766489606	537.660341730721	64.2150297972308	556.192118003265	-3.12155665478765	1.5900820909501e-36	9.69751934409036e-35	Solyc07g007325_1	7	2067417	2069060	+	410	protein_coding	NA && - && -	-
Solyc07g020860_3	1899.3714372903	2157.82172754439	1674.01576791107	4391.03731892043	3853.07021704321	4351.4376164699	1910.40297758192	4198.51505081118	-1.13541441158144	1.61637629206879e-36	9.82726666764926e-35	Solyc07g020860_3	7	14286090	14291641	+	927	protein_coding	NA && sp|Q9XEX2|PRX2B_ARATH Peroxiredoxin-2B OS=Arabidopsis thaliana OX=3702 GN=PRXIIB PE=1 SV=1 && PF08534:Redoxin	ZF-HD
Solyc06g062920_3	958.182562652297	799.497604166337	851.349140534212	2038.83338953206	1965.70680204053	2050.33160167462	869.676435784282	2018.29059774907	-1.21549250623609	3.74490733253772e-36	2.26978485600901e-34	Solyc06g062920_3	6	39833459	39835655	+	1807	protein_coding	NA && sp|Q9ZUF4|RIPK_ARATH Serine/threonine-protein kinase RIPK OS=Arabidopsis thaliana OX=3702 GN=RIPK PE=1 SV=1 && PF07714:Protein tyrosine kinase	WRKY
Solyc06g082780_3	839.226746552216	543.564450409713	590.599020921896	72.3755055196424	109.205933446696	98.3035699433035	657.796739294608	93.2950029698806	2.81699956253164	3.84160321675099e-36	2.32120574612142e-34	Solyc06g082780_3	6	48505872	48509628	-	1472	protein_coding	NA && sp|F4I111|MCU6_ARATH Calcium uniporter protein 6, mitochondrial OS=Arabidopsis thaliana OX=3702 GN=At1g09575 PE=2 SV=1 && PF04678:Mitochondrial calcium uniporter	GRAS
Solyc09g015830_2	2291.53346838946	2706.08219912395	2610.10869731928	1139.52923584118	1140.33152243977	1225.11659956552	2535.9081216109	1168.32578594883	1.11797613257327	6.06167094843124e-36	3.65136406638272e-34	Solyc09g015830_2	9	11274996	11278321	-	2029	protein_coding	NA && sp|Q9SCZ4|FERON_ARATH Receptor-like protein kinase FERONIA OS=Arabidopsis thaliana OX=3702 GN=FER PE=1 SV=1 && PF07714:Protein tyrosine kinase	B3
Solyc06g082620_1	2011.79121953872	2212.99997629008	2007.77592101483	798.440417275204	877.60420429265	964.311209920025	2077.52237228121	880.11861049596	1.23863653582834	9.70106995013467e-36	5.80788521143078e-34	Solyc06g082620_1	6	48425520	48426158	-	639	protein_coding	NA && sp|A7RP64|PNO1_NEMVE RNA-binding protein pno1 OS=Nematostella vectensis OX=45351 GN=pno1 PE=3 SV=1 && -	-
Solyc01g108360_3	250.983699903466	311.111402502319	213.815098082099	4.61971311827505	7.91347343816637	1.33746353664359	258.636733495962	4.62355003102833	5.84703957770781	9.93662441060825e-36	5.93077122214871e-34	Solyc01g108360_3	1	95592188	95593039	+	755	protein_coding	NA && - && -	-
ENSRNA050030201	1035.3077621018	1166.96126070681	1003.88796050742	285.652261146674	304.668727369405	357.771496052159	1068.71899443868	316.030828189413	1.75668743693566	1.27510887514649e-35	7.58388768036763e-34	LSU_rRNA_eukarya	5	34101486	34102274	-	789	rRNA	Eukaryotic large subunit ribosomal RNA && - && -	-
Solyc06g024245_1	1290.21308231626	1294.92783758513	1082.11299639111	331.079440143045	345.81878924787	423.307209347695	1222.4179720975	366.735146246203	1.73561389506361	1.27837918706713e-35	7.58388768036763e-34	Solyc06g024245_1	6	11617584	11618539	+	516	protein_coding	NA && - && -	-
Solyc01g104370_3	2573.89013078086	2200.085918073	2220.28726849887	1024.80636007068	1100.76415524894	1004.43511601933	2331.42110578425	1043.33521044632	1.16011064119184	1.4880803885389e-35	8.80125370586887e-34	Solyc01g104370_3	1	92659215	92659971	-	363	protein_coding	NA && sp|Q8LEQ0|RLA13_ARATH 60S acidic ribosomal protein P1-3 OS=Arabidopsis thaliana OX=3702 GN=RPP1C PE=1 SV=2 && -	-
Solyc01g091620_3	253.598113444128	197.232889133546	294.647635161917	955.510663296556	1052.49196727613	968.992332298277	248.49287924653	992.33165429032	-2.00003003821175	1.90696191514937e-35	1.1244757052072e-33	Solyc01g091620_3	1	85072388	85076647	-	2091	protein_coding	NA && sp|Q96287|KSG8_ARATH Shaggy-related protein kinase theta OS=Arabidopsis thaliana OX=3702 GN=ASK8 PE=2 SV=3 && PF00069:Protein kinase domain	HD-ZIP
Solyc11g011390_2	705.8916559785	787.757551241722	644.05279544242	1846.34534293726	1925.34808750588	1679.85420202434	712.567334220881	1817.18254415583	-1.34928852383258	2.03292918017939e-35	1.19515479160276e-33	Solyc11g011390_2	11	4456124	4472707	+	3125	protein_coding	NA && sp|P12424|GLNA_NICPL Glutamine synthetase OS=Nicotiana plumbaginifolia OX=4092 PE=2 SV=1 && PF13424:Tetratricopeptide repeat|PF00120:Glutamine synthetase, catalytic domain	AP2
Solyc08g076320_3	903.279878298413	1209.22545123543	1273.76433430616	2753.34901849193	3026.90359009864	2867.52182256385	1128.75655461334	2882.59147705147	-1.35212573111326	2.04374690476957e-35	1.19791716031958e-33	Solyc08g076320_3	8	60407386	60413427	-	4936	protein_coding	NA && sp|Q9LFL0|CSLD2_ARATH Cellulose synthase-like protein D2 OS=Arabidopsis thaliana OX=3702 GN=CSLD2 PE=3 SV=1 && PF14570:RING/Ubox like zinc-binding domain|PF03552:Cellulose synthase	LBD
Solyc03g114150_3	1039.22938241279	1010.81855680942	930.877927015968	2115.82860816997	2273.5409187852	2089.7867760056	993.641955412727	2159.71876765359	-1.11970363245395	2.67830888484969e-35	1.56517173249858e-33	Solyc03g114150_3	3	65653816	65658520	+	1997	protein_coding	NA && sp|C7A2A0|BALDH_ANTMA Benzaldehyde dehydrogenase, mitochondrial OS=Antirrhinum majus OX=4151 GN=BALDH PE=1 SV=1 && PF00171:Aldehyde dehydrogenase family	bHLH
Solyc09g098160_3	524.189914902552	749.015376590489	495.4252272634	67.7557924013674	101.29246000853	74.8979580520408	589.543506252147	81.3154034873126	2.86066375277649	8.28534851467237e-35	4.82744844856372e-33	Solyc09g098160_3	9	72541915	72543890	+	994	protein_coding	NA && sp|Q9SEE4|PIRL_SOLLC Pirin-like protein OS=Solanum lycopersicum OX=4081 PE=2 SV=1 && PF05726:Pirin C-terminal cupin domain|PF02678:Pirin	-
Solyc08g077020_1	870.599709040149	927.46418104465	921.751672829537	222.516181863582	235.821508457358	289.560855683336	906.605187638112	249.299515334759	1.86074537264831	1.55391965031214e-34	9.02702818817825e-33	Solyc08g077020_1	8	61088095	61088466	-	372	protein_coding	NA && - && PF02519:Auxin responsive protein	-
Solyc06g007440_3	257.519733755119	406.205831191707	308.988891740594	27.7182787096503	23.7404203144991	18.0557577446884	324.23815222914	23.1714855896126	3.81334119113209	1.7010447839259e-34	9.85247151920631e-33	Solyc06g007440_3	6	1452508	1454294	-	1274	protein_coding	NA && sp|O22932|CIPKB_ARATH CBL-interacting serine/threonine-protein kinase 11 OS=Arabidopsis thaliana OX=3702 GN=CIPK11 PE=1 SV=1 && PF00069:Protein kinase domain|PF03822:NAF domain	YABBY
Solyc02g090120_1	75.8179926791722	38.7421746512322	116.033803227481	749.933429533316	635.45191708476	752.991971130338	76.8646568526283	712.792439249471	-3.22033413681062	1.72231431808174e-34	9.94623817259179e-33	Solyc02g090120_1	2	52381758	52382018	-	261	protein_coding	NA && - && -	-
Solyc06g068520_3	222.225150956194	245.367106124471	259.446369014254	7.69952186379175	14.2442521886995	8.02478121986151	242.346208698306	9.98951842411758	4.61092190789629	2.14183055070765e-34	1.23325343209422e-32	Solyc06g068520_3	6	42585917	42587534	+	1111	protein_coding	NA && sp|Q7XAD0|HSY1_SOLLC Hydroxyproline-rich systemin OS=Solanum lycopersicum OX=4081 PE=1 SV=1 && -	-
Solyc02g062500_3	403.926892032141	370.98567241786	392.428930016536	55.4365574193006	56.9770087547979	46.8112237825255	389.113831488846	53.0749299855413	2.87661597085182	2.40431089304849e-34	1.3803282801528e-32	Solyc02g062500_3	2	34717968	34722274	+	1651	protein_coding	NA && sp|Q945B6|AOP1L_ARATH Probable 2-oxoglutarate-dependent dioxygenase AOP1.2 OS=Arabidopsis thaliana OX=3702 GN=AOP1.2 PE=2 SV=1 && PF03171:2OG-Fe(II) oxygenase superfamily|PF14226:non-haem dioxygenase in morphine synthesis N-terminal	Dof
Solyc05g007930_3	439.221474831066	374.507688295245	408.073937193275	56.9764617920589	28.4885043773989	34.7740519527332	407.267700106529	40.079672707397	3.34624791062371	2.89722881696398e-34	1.65845171197965e-32	Solyc05g007930_3	5	2351707	2358388	-	3677	protein_coding	NA && sp|Q8L7F9|B3GTF_ARATH Beta-1,3-galactosyltransferase GALT1 OS=Arabidopsis thaliana OX=3702 GN=GALT1 PE=1 SV=1 && PF00337:Galactoside-binding lectin|PF01762:Galactosyltransferase	FAR1
Solyc03g020050_3	4034.04009324009	4383.73576205155	3469.28034144186	53.1267008601631	145.607911262261	74.229226283719	3962.35206557783	90.9879461353811	5.44567011892253	4.86116321727214e-34	2.77454788059874e-32	Solyc03g020050_3	3	62638145	62639107	+	800	protein_coding	NA && sp|Q43502|IP23_SOLLC Proteinase inhibitor type-2 CEVI57 OS=Solanum lycopersicum OX=4081 GN=CEVI57 PE=2 SV=1 && PF02428:Potato type II proteinase inhibitor family	-
Solyc09g082810_3	522.882708132222	399.161799436938	404.16268539909	19.2488046594794	25.3231150021324	52.1610779290998	442.06906432275	32.2443325302372	3.76425347581395	6.22449339248993e-34	3.542351951883e-32	Solyc09g082810_3	9	68903774	68905407	+	1008	protein_coding	NA && - && PF07172:Glycine rich protein family	-
Solyc02g071950_1	151.635985358344	105.660476321542	125.160057413912	609.802131612307	830.914711007469	664.05064594354	127.485506364599	701.589162854439	-2.46259981291886	6.78319734204418e-34	3.84912041638258e-32	Solyc02g071950_1	2	41867289	41867591	+	303	protein_coding	NA && - && -	-
Solyc09g011670_3	1034.00055533147	722.013254863873	817.451624984611	190.178190035656	212.872435486675	159.158160860587	857.821811726651	187.402928794306	2.19588947486115	7.41001292368432e-34	4.19265384413202e-32	Solyc09g011670_3	9	4910693	4915143	-	672	protein_coding	NA && - && PF00582:Universal stress protein family	-
Solyc07g005630_3	83.6612333011555	35.2201587738475	114.730052629419	3018.98252279274	2980.21409681345	2652.19019316423	77.8704815681407	2883.79560425681	-5.21387920069312	7.47781795829115e-34	4.21882542275118e-32	Solyc07g005630_3	7	509651	513189	-	541	protein_coding	NA && - && -	-
Solyc06g035760_3	19.6081015549583	24.6541111416932	41.7200191379706	404.994850035446	322.078368933371	407.257646907972	28.660743944874	378.110288625596	-3.72523656909721	9.69757559232374e-34	5.4554436026127e-32	Solyc06g035760_3	6	24998266	25000682	+	2324	protein_coding	NA && sp|Q9FXW4|C80B2_COPJA Probable (S)-N-methylcoclaurine 3'-hydroxylase isozyme 2 OS=Coptis japonica OX=3442 GN=CYP80B2 PE=2 SV=1 && PF00067:Cytochrome P450	MYB
Solyc01g006530_2	304.579177487019	271.195222558625	224.245102866592	6.1596174910334	0	1.33746353664359	266.673167637412	2.49902700922566	6.75325770878141	1.09975426710408e-33	6.16902271836581e-32	Solyc01g006530_2	1	1099091	1106640	+	4869	protein_coding	NA && sp|Q0JEU6|LERK3_ORYSJ G-type lectin S-receptor-like serine/threonine-protein kinase LECRK3 OS=Oryza sativa subsp. japonica OX=39947 GN=LECRK3 PE=3 SV=2 && PF01453:D-mannose binding lectin|PF00069:Protein kinase domain	WRKY
Solyc12g010400_2	1607.86432750658	1583.73313953067	1430.21440607355	423.473702508546	277.76291767964	490.849117948196	1540.6039577036	397.361912712127	1.95314425321834	1.78922044901673e-33	1.00078767801144e-31	Solyc12g010400_2	12	3450399	3451449	+	424	protein_coding	NA && - && -	-
Solyc12g008940_2	1618.32198166923	1479.24666850159	1560.58946587971	698.346633045912	645.739432554376	655.357132955357	1552.71937201684	666.481066185215	1.21999327461844	3.87007366315128e-33	2.15239863930434e-31	Solyc12g008940_2	12	2246774	2252333	-	1937	protein_coding	NA && sp|Q70Z18|NAP1B_TOBAC Nucleosome assembly protein 1;2 OS=Nicotiana tabacum OX=4097 GN=NAP1;2 PE=1 SV=1 && PF00956:Nucleosome assembly protein (NAP)	MYB_related
Solyc09g074890_1	384.318790477183	432.033947625862	426.326445566137	1127.21000085911	1154.57577462847	1155.56849566006	414.226394556394	1145.78475704921	-1.46730815612731	4.64699808762718e-33	2.5706481893199e-31	Solyc09g074890_1	9	67124599	67124955	+	357	protein_coding	NA && sp|Q945T0|RALF_TOBAC Rapid alkalinization factor OS=Nicotiana tabacum OX=4097 GN=RALF PE=1 SV=1 && PF05498:Rapid ALkalinization Factor (RALF)	HSF
Solyc10g083970_1	1349.03738698113	1157.56921836712	1043.00047844926	404.224897849067	311.790853463755	312.966467574599	1183.20236126584	342.994072962474	1.78694773089307	4.64836011145346e-33	2.5706481893199e-31	Solyc10g083970_1	10	63789458	63790630	-	1173	protein_coding	NA && sp|P43282|METK3_SOLLC S-adenosylmethionine synthase 3 OS=Solanum lycopersicum OX=4081 GN=SAM3 PE=2 SV=1 && PF00438:S-adenosylmethionine synthetase, N-terminal domain|PF02772:S-adenosylmethionine synthetase, central domain|PF02773:S-adenosylmethionine synthetase, C-terminal domain	-
Solyc06g066770_1	128.106263492394	113.878513368773	91.2625418643106	696.806728673153	544.446972545846	592.496346733108	111.082439575159	611.250015984036	-2.45976855013455	5.8957951422861e-33	3.25132342255028e-31	Solyc06g066770_1	6	42066084	42067187	-	1104	protein_coding	NA && sp|Q9M8L2|FBK30_ARATH F-box/kelch-repeat protein At1g80440 OS=Arabidopsis thaliana OX=3702 GN=At1g80440 PE=2 SV=1 && PF01344:Kelch motif	bHLH
Solyc01g056940_2	1657.53818477914	1905.41058966515	1864.36335522806	656.769214981436	785.807912409921	778.403778326567	1809.10404322412	740.326968572641	1.28897370399847	7.25212902360868e-33	3.98805982851649e-31	Solyc01g056940_2	1	57596505	57597260	+	756	nontranslating_CDS	NA && sp|P62980|RS27A_SOLLC Ubiquitin-40S ribosomal protein S27a OS=Solanum lycopersicum OX=4081 GN=UBI3 PE=1 SV=2 && PF01599:Ribosomal protein S27a|PF00240:Ubiquitin family	YABBY
Solyc02g069310_3	840.533953322547	1091.82492198927	878.727903093505	270.25321741909	221.577256268658	266.823975560395	937.028926135108	252.884816416048	1.88943240679199	1.41449623784146e-32	7.756748696981e-31	Solyc02g069310_3	2	39807499	39815115	+	4767	protein_coding	NA && sp|E7BQV0|NPR1_MALHU BTB/POZ domain and ankyrin repeat-containing protein NPR1 OS=Malus hupehensis OX=106556 GN=NPR1 PE=2 SV=2 && PF12313:NPR1/NIM1 like defence protein C terminal|PF12796:Ankyrin repeats (3 copies)|PF00651:BTB/POZ domain	MYB
Solyc05g051240_1	907.201498609405	979.12041391296	1147.30052629419	158.61015039411	280.928307054906	177.213918605275	1011.20747960552	205.58412535143	2.30001308858244	2.22993276323831e-32	1.2194244051932e-30	Solyc05g051240_1	5	62370194	62371537	+	1344	protein_coding	NA && sp|Q9LZL3|PCS1L_ARATH Aspartic proteinase PCS1 OS=Arabidopsis thaliana OX=3702 GN=PCS1 PE=2 SV=1 && PF14541:Xylanase inhibitor C-terminal|PF14543:Xylanase inhibitor N-terminal	G2-like
Solyc11g006030_1	332.030519663961	523.606360437866	501.943980253708	45.4271789963713	66.4731768805975	47.4799555508473	452.526953451845	53.1267704759387	3.09369272595184	2.29040901036731e-32	1.24900660712983e-30	Solyc11g006030_1	11	840437	841729	-	1293	protein_coding	NA && sp|Q5PNY6|PUB21_ARATH U-box domain-containing protein 21 OS=Arabidopsis thaliana OX=3702 GN=PUB21 PE=2 SV=1 && PF04564:U-box domain	Dof
Solyc05g009420_1	1104.58972092932	1134.08911251789	1100.36550476397	328.769583583908	390.134240501602	414.613696359511	1113.01477940373	377.839173481674	1.55780437650081	2.48957263041916e-32	1.353843427381e-30	Solyc05g009420_1	5	3585440	3586381	-	942	protein_coding	NA && - && -	-
Solyc12g042950_2	1969.96060288815	2385.57875428193	1692.26827628393	797.670465088825	738.327071780922	724.905236860823	2015.935877818	753.63425791019	1.42027869808943	3.17383225972096e-32	1.72116659691294e-30	Solyc12g042950_2	12	59396144	59399769	+	2396	protein_coding	NA && sp|O24381|TLC1_SOLTU Plastidic ATP/ADP-transporter OS=Solanum tuberosum OX=4113 PE=2 SV=2 && PF03219:TLC ATP/ADP transporter	bZIP
Solyc10g045420_2	803.932163753291	726.709276033719	855.260392328397	126.272158566185	56.1856614109812	139.764939579255	795.300610705136	107.407586518807	2.88424285970813	3.29688535055382e-32	1.78295924054674e-30	Solyc10g045420_2	10	33322744	33326726	+	2514	protein_coding	NA && sp|O64884|OFT20_ARATH O-fucosyltransferase 20 OS=Arabidopsis thaliana OX=3702 GN=OFUT20 PE=1 SV=1 && PF10250:GDP-fucose protein O-fucosyltransferase	MIKC_MADS
Solyc12g045030_2	724.192550763127	744.319355420643	492.817726067277	2137.38726938859	1808.22868062102	1968.74632593936	653.776544083683	1971.45409198299	-1.59148722332643	4.10778266615023e-32	2.21523054167983e-30	Solyc12g045030_2	12	61357135	61358515	+	1188	protein_coding	NA && sp|Q21929|DCXR_CAEEL L-xylulose reductase OS=Caenorhabditis elegans OX=6239 GN=dhs-21 PE=1 SV=2 && PF00106:short chain dehydrogenase	NAC
Solyc01g096200_3	792.167302820316	813.585667675876	779.642857640825	102.40364078843	182.009889077827	84.2602028085459	795.131942712339	122.891244224934	2.69802193874717	4.11883290172886e-32	2.21523054167983e-30	Solyc01g096200_3	1	87169096	87176182	-	3245	protein_coding	NA && sp|Q9LM76|PUB44_ARATH U-box domain-containing protein 44 OS=Arabidopsis thaliana OX=3702 GN=PUB44 PE=1 SV=1 && PF04564:U-box domain|PF05659:Arabidopsis broad-spectrum mildew resistance protein RPW8	GeBP
Solyc07g006220_2	1507.20940619113	1486.29070025636	1148.60427689225	469.670833691297	503.296910667381	455.406334227141	1380.70146111325	476.12469286194	1.53672332774589	5.31455977263837e-32	2.85049689503949e-30	Solyc07g006220_2	7	1040137	1041437	-	1301	protein_coding	NA && sp|Q9M0B6|GAE1_ARATH UDP-glucuronate 4-epimerase 1 OS=Arabidopsis thaliana OX=3702 GN=GAE1 PE=1 SV=1 && PF16363:GDP-mannose 4,6 dehydratase	ERF
Solyc01g102350_3	424.84220035743	684.445085505102	468.046464704107	62.3661270967132	87.0482078198301	68.2106403688229	525.777916855547	72.5416584284554	2.85998594346294	6.00739633500756e-32	3.2133004931815e-30	Solyc01g102350_3	1	91057118	91062557	-	2130	protein_coding	NA && sp|Q66GM8|PAE10_ARATH Pectin acetylesterase 10 OS=Arabidopsis thaliana OX=3702 GN=PAE10 PE=2 SV=1 && PF03283:Pectinacetylesterase	bHLH
Solyc02g062550_3	1041.84379595345	1040.16868912096	1104.27675655816	386.515997562346	385.386156438702	402.576524529719	1062.09641387752	391.492892843589	1.43938764828529	6.23487257300188e-32	3.32588829323318e-30	Solyc02g062550_3	2	34820696	34822701	-	1720	protein_coding	NA && sp|Q8VZG2|HSR4_ARATH Protein HYPER-SENSITIVITY-RELATED 4 OS=Arabidopsis thaliana OX=3702 GN=HSR4 PE=2 SV=1 && PF14363:Domain associated at C-terminal with AAA|PF00004:ATPase family associated with various cellular activities (AAA)	NAC
Solyc03g119060_3	308.500797798011	336.939518936474	282.913879779363	942.42147612811	947.242770548514	1076.65814699809	309.451398837949	988.774131224904	-1.67519144041097	6.67228204491369e-32	3.54954526068683e-30	Solyc03g119060_3	3	69256602	69262331	+	2524	protein_coding	NA && sp|Q9C9U3|DOX2_ARATH Alpha-dioxygenase 2 OS=Arabidopsis thaliana OX=3702 GN=DOX2 PE=2 SV=1 && PF03098:Animal haem peroxidase	-
Solyc06g062430_3	307.19359102768	313.459413087242	262.053870210378	29.2581830824086	17.409641563966	27.4180025011935	294.2356247751	24.6952757158561	3.57064996337776	7.85173829290437e-32	4.16567697995092e-30	Solyc06g062430_3	6	39493055	39496715	-	1264	protein_coding	NA && sp|Q8L799|MIOX1_ARATH Inositol oxygenase 1 OS=Arabidopsis thaliana OX=3702 GN=MIOX1 PE=2 SV=1 && PF05153:Myo-inositol oxygenase	C3H
Solyc04g079120_3	1077.13837875238	1029.60264148881	1027.35547127252	378.816475698554	310.999506119938	278.861147390188	1044.69883050457	322.892376402893	1.69515850764346	7.93857657917139e-32	4.20036523487671e-30	Solyc04g079120_3	4	63790772	63796642	-	2290	protein_coding	NA && sp|Q9FX08|P2C12_ARATH Probable protein phosphatase 2C 12 OS=Arabidopsis thaliana OX=3702 GN=At1g47380 PE=2 SV=1 && PF00481:Protein phosphatase 2C	B3
Solyc06g073830_1	1090.21044645568	1021.38460444158	1272.4605837081	292.581830824086	260.353276115674	379.839644406778	1128.01854486845	310.924917115513	1.85671386010923	1.21955725862027e-31	6.43538341024504e-30	Solyc06g073830_1	6	45730248	45730802	-	555	protein_coding	NA && - && PF13499:EF-hand domain pair|PF13833:EF-hand domain pair	-
Solyc09g009260_3	1001.3203860732	1183.39733480127	1019.53296768416	2156.63607404807	2474.54314411462	2406.76563419013	1068.08356285288	2345.98161745094	-1.13432189101326	1.30486837203339e-31	6.86704519335961e-30	Solyc09g009260_3	9	2642598	2645905	-	2509	protein_coding	NA && sp|Q9SJQ9|ALFC6_ARATH Fructose-bisphosphate aldolase 6, cytosolic OS=Arabidopsis thaliana OX=3702 GN=FBA6 PE=1 SV=1 && PF00274:Fructose-bisphosphate aldolase class-I	ERF
Solyc01g108030_3	617.001595596022	595.220683278022	775.73160584664	160.920006953248	141.651174543178	155.145770250656	662.651294906895	152.572317249027	2.11792983555501	2.00907530944878e-31	1.04884446221544e-29	Solyc01g108030_3	1	95295772	95301076	-	2794	protein_coding	NA && sp|Q9LDD8|MCCB_ARATH Methylcrotonoyl-CoA carboxylase beta chain, mitochondrial OS=Arabidopsis thaliana OX=3702 GN=MCCB PE=2 SV=1 && PF01039:Carboxyl transferase domain	bZIP
Solyc01g108460_2	705.8916559785	621.048799712177	655.786550824975	115.492827956876	160.643510794777	162.501819702196	660.909002171884	146.212719484616	2.17498896569393	3.05548402390405e-31	1.59088326425451e-29	Solyc01g108460_2	1	95672553	95697258	-	9417	protein_coding	NA && sp|A0A0C3VJP4|SCP1_MEDTR Serine carboxypeptidase 1 OS=Medicago truncatula OX=3880 GN=SCP1 PE=1 SV=3 && PF00450:Serine carboxypeptidase	C3H
Solyc05g041910_3	3130.76021494168	2792.9585907661	2822.62004480332	1467.52886723871	1229.75377229105	1077.32687876641	2915.4462835037	1258.20317276539	1.21291274701572	3.11443521538496e-31	1.61727581463107e-29	Solyc05g041910_3	5	55034291	55037155	+	1668	protein_coding	NA && sp|Q9FKH6|B561P_ARATH Cytochrome b561 and DOMON domain-containing protein At5g35735 OS=Arabidopsis thaliana OX=3702 GN=At5g35735 PE=2 SV=1 && PF03188:Eukaryotic cytochrome b561|PF04526:Protein of unknown function (DUF568)	bZIP
Solyc03g115870_3	849.684400714861	965.032350403421	713.151577139684	229.445751540994	227.908035019191	182.563772751849	842.622776085988	213.305853104012	1.98415830161806	3.54804073472363e-31	1.83271750563811e-29	Solyc03g115870_3	3	66953812	66957875	+	3750	protein_coding	NA && sp|Q9XFI1|TRL12_ARATH Thioredoxin-like 1-2, chloroplastic OS=Arabidopsis thaliana OX=3702 GN=At5g61440 PE=2 SV=1 && PF00085:Thioredoxin	HRT-like
Solyc01g010430_3	1939.89484717054	1876.06045735361	1714.43203645098	830.008456916751	693.220273183374	833.908515097275	1843.46244699171	785.7124150658	1.22976477698198	4.36232703014857e-31	2.2474020070847e-29	Solyc01g010430_3	1	5283640	5287279	+	1523	protein_coding	NA && - && PF04601:Domain of unknown function (DUF569)	M-type_MADS
Solyc02g091990_3	585.628633108088	567.044556258944	281.610129181301	18.4788524731002	37.1933251593819	46.8112237825255	478.094439516111	34.1611338050025	3.80142202531926	7.38617534033806e-31	3.79525340256688e-29	ACS3	2	53844982	53847973	-	2673	protein_coding	NA && sp|Q42881|1A13_SOLLC 1-aminocyclopropane-1-carboxylate synthase 3 OS=Solanum lycopersicum OX=4081 GN=ACS3 PE=1 SV=1 && PF00155:Aminotransferase class I and II	-
Solyc05g046290_3	69.2819588275194	65.7442963778486	66.4912805011406	414.234276271996	405.961187377935	538.329073499043	67.1725119021695	452.841512382991	-2.75418216661602	7.54844333520161e-31	3.86847840767649e-29	Solyc05g046290_3	5	59336798	59339610	+	1093	protein_coding	NA && sp|Q38910|XTH23_ARATH Probable xyloglucan endotransglucosylase/hydrolase protein 23 OS=Arabidopsis thaliana OX=3702 GN=XTH23 PE=2 SV=1 && PF00722:Glycosyl hydrolases family 16|PF06955:Xyloglucan endo-transglycosylase (XET) C-terminus	NAC
Solyc01g098690_2	857.527641336844	833.543757647723	917.840421035352	283.342404587536	289.633127836889	290.229587451658	869.637273339973	287.735039958695	1.5953610745987	8.35584117054761e-31	4.27107839675746e-29	Solyc01g098690_2	1	88989482	88992582	+	3101	protein_coding	NA && sp|F4KHA2|RLP54_ARATH Receptor-like protein 54 OS=Arabidopsis thaliana OX=3702 GN=RLP54 PE=3 SV=1 && PF08263:Leucine rich repeat N-terminal domain|PF13855:Leucine rich repeat	C2H2
Solyc03g116340_3	1495.44454525815	1306.66789050974	1482.36442999602	572.844426666106	616.45958083316	530.304292279181	1428.15895525464	573.202766592816	1.31743324402859	1.06061303060715e-30	5.40719304692611e-29	Solyc03g116340_3	3	67305883	67309101	+	1184	protein_coding	NA && sp|Q9SN74|BH047_ARATH Transcription factor bHLH47 OS=Arabidopsis thaliana OX=3702 GN=BHLH47 PE=1 SV=1 && -	bHLH
Solyc02g086460_3	101.962128085783	132.662598048159	113.426302031357	518.177821433185	620.416317552243	580.459174903316	116.017009388433	573.017771296248	-2.30185866450283	1.10315276667379e-30	5.60946018523967e-29	Solyc02g086460_3	2	49761704	49779431	+	12110	protein_coding	NA && - && -	-
Solyc08g078670_2	112.419782248428	82.1803704723108	45.6312709321553	554.365574193006	674.227936931775	575.778052525063	80.0771412176313	601.457187883281	-2.90862311779381	1.16995781431681e-30	5.93374718416587e-29	Solyc08g078670_2	8	62570510	62572436	+	1741	protein_coding	NA && sp|Q940R4|ASP63_ARATH Probable aspartyl protease At4g16563 OS=Arabidopsis thaliana OX=3702 GN=At4g16563 PE=2 SV=1 && PF14543:Xylanase inhibitor N-terminal|PF14541:Xylanase inhibitor C-terminal	G2-like
Solyc09g075120_3	1015.69966054684	828.847736477877	921.751672829537	235.605369032028	257.979234084224	306.279149891381	922.099689951418	266.621251002544	1.7881363778075	1.5618613268692e-30	7.90091968891948e-29	Solyc09g075120_3	9	67350535	67355299	+	1768	protein_coding	NA && sp|Q9LZI2|UXS2_ARATH UDP-glucuronic acid decarboxylase 2 OS=Arabidopsis thaliana OX=3702 GN=UXS2 PE=1 SV=1 && PF16363:GDP-mannose 4,6 dehydratase	FAR1
Solyc03g006620_3	422.227786816769	399.161799436938	383.302675830105	44.6572268099921	66.4731768805975	34.1053201844114	401.564087361271	48.4119079583337	3.05883664173171	1.68468480562317e-30	8.49406669853159e-29	Solyc03g006620_3	3	1197391	1199002	+	1340	protein_coding	NA && - && PF05553:Cotton fibre expressed protein|PF14364:Domain of unknown function (DUF4408)	-
Solyc06g066600_3	175.165707224294	295.849333700319	301.166388152225	10.7793306093084	16.6182942201494	13.3746353664359	257.393809692279	13.5907533986312	4.24558118138097	1.68779279038095e-30	8.49406669853159e-29	Solyc06g066600_3	6	41958871	41965288	-	1476	protein_coding	NA && sp|Q2V4B9|PLST3_ARATH Probable plastidic glucose transporter 3 OS=Arabidopsis thaliana OX=3702 GN=At1g79820 PE=2 SV=2 && PF00083:Sugar (and other) transporter	GRAS
Solyc11g027760_1	698.048415356516	873.459937591417	666.216555609467	144.751011039285	122.658838291579	193.263481044998	745.908302852467	153.557776791954	2.277558227686	1.6987996661979e-30	8.52753873465547e-29	Solyc11g027760_1	11	18865222	18865500	+	279	protein_coding	NA && - && -	-
Solyc12g017910_2	411.770132654125	390.943762389707	371.56892044755	1101.03162652222	1312.8452433918	1050.57760803354	391.427605163794	1154.81815931585	-1.56045913812938	1.86943848480669e-30	9.36010159004109e-29	Solyc12g017910_2	12	7756889	7765268	-	2986	protein_coding	NA && sp|Q9LD18|POT4_ARATH Potassium transporter 4 OS=Arabidopsis thaliana OX=3702 GN=POT4 PE=1 SV=2 && PF02705:K+ potassium transporter	NF-X1
Solyc02g089620_3	2483.69286362805	2466.58511946178	2709.19374277196	188.638285662898	178.053152358743	81.5852757352587	2553.15724195393	149.4255712523	4.09647871906947	3.09002915214304e-30	1.54320154876287e-28	Solyc02g089620_3	2	52013726	52015927	-	1940	protein_coding	NA && sp|Q6NKX1|PROD2_ARATH Proline dehydrogenase 2, mitochondrial OS=Arabidopsis thaliana OX=3702 GN=POX2 PE=2 SV=1 && PF01619:Proline dehydrogenase	-
Solyc08g028780_1	824.84747207858	666.835006118179	880.031653691566	193.257998781173	151.938690012794	104.990887626521	790.571377296108	150.062525473496	2.39988774492444	3.29523575651089e-30	1.64149695687567e-28	Solyc08g028780_1	8	40094251	40095270	-	1020	protein_coding	NA && - && PF05910:Plant protein of unknown function (DUF868)	CPP
Solyc03g005450_3	86.2756468418166	83.3543757647723	155.146321169328	719.905294264529	686.098147089024	588.483956123177	108.258781258639	664.829132492243	-2.62125803343424	3.60660547476485e-30	1.79204353755004e-28	Solyc03g005450_3	3	338540	346806	+	2640	protein_coding	NA && sp|Q8VYR4|CSLG2_ARATH Cellulose synthase-like protein G2 OS=Arabidopsis thaliana OX=3702 GN=CSLG2 PE=2 SV=1 && PF03552:Cellulose synthase	ARF
Solyc01g095080_3	631.380870069658	643.354900268947	655.786550824975	145.520963225664	77.5520396940304	125.721572444497	643.50744038786	116.264858454731	2.46677940801008	3.68206713263327e-30	1.8249070444446e-28	ACS2	1	86328345	86331529	-	2121	protein_coding	NA && sp|P18485|1A12_SOLLC 1-aminocyclopropane-1-carboxylate synthase 2 OS=Solanum lycopersicum OX=4081 GN=ACS2 PE=1 SV=2 && PF00155:Aminotransferase class I and II	M-type_MADS
Solyc09g090700_1	315.036831649664	228.931032030009	308.988891740594	1000.93784229293	902.135971950966	1015.13482431248	284.318918473422	972.736212852125	-1.77698871509185	4.5812051459733e-30	2.26480437229089e-28	Solyc09g090700_1	9	70618770	70620338	-	1569	protein_coding	NA && sp|Q9SAK4|SSDH_ARATH Succinate-semialdehyde dehydrogenase, mitochondrial OS=Arabidopsis thaliana OX=3702 GN=ALDH5F1 PE=1 SV=2 && PF00171:Aldehyde dehydrogenase family	bHLH
Solyc05g050120_3	1413.09051872733	1293.75383229266	1194.23554782441	512.788156128531	538.116193795313	474.130823740151	1300.35996628147	508.345057887998	1.35572759737492	5.65775019059293e-30	2.78996915569868e-28	Solyc05g050120_3	5	60955438	60959825	+	2190	protein_coding	NA && sp|P12628|MAOX_PHAVU NADP-dependent malic enzyme OS=Phaseolus vulgaris OX=3885 GN=ME1 PE=2 SV=1 && PF00390:Malic enzyme, N-terminal domain|PF03949:Malic enzyme, NAD binding domain	MYB_related
Solyc09g082860_3	839.226746552216	727.883281326181	675.342809795898	1686.19528817039	1746.50358780332	1965.40266709775	747.484279224765	1799.36718102382	-1.26795280808793	5.95098809531108e-30	2.92719834024887e-28	Solyc09g082860_3	9	68969730	68975978	+	4029	protein_coding	NA && sp|Q9LIK9|APS1_ARATH ATP sulfurylase 1, chloroplastic OS=Arabidopsis thaliana OX=3702 GN=APS1 PE=1 SV=1 && PF01747:ATP-sulfurylase|PF14306:PUA-like domain	MYB_related
Solyc06g074990_2	28.7585489472722	57.5262593306175	18.2525083728621	971.679659210519	1212.34413072709	1011.12243370255	34.8457722169173	1065.04874121339	-4.92609543068342	6.62818220904549e-30	3.25212839865874e-28	Solyc06g074990_2	6	46631149	46633554	-	2175	protein_coding	NA && sp|Q9FJH8|NRT24_ARATH High affinity nitrate transporter 2.4 OS=Arabidopsis thaliana OX=3702 GN=NRT2.4 PE=2 SV=1 && PF07690:Major Facilitator Superfamily	-
Solyc01g106690_3	1434.00582705262	1643.60740944622	1322.00310643444	568.224713547831	588.762423799578	612.558299782762	1466.53878097776	589.84847904339	1.31421801750214	7.11058372911993e-30	3.48009744162452e-28	Solyc01g106690_3	1	94356992	94358687	-	1614	protein_coding	NA && - && PF06219:Protein of unknown function (DUF1005)	M-type_MADS
Solyc02g065090_3	1047.07262303477	973.250387450652	1297.23184507127	367.267192902866	315.747590182838	367.133740808664	1105.8516185189	350.04950796479	1.65846742525032	7.6825950763713e-30	3.75067740174865e-28	Solyc02g065090_3	2	36826039	36836514	+	3990	protein_coding	NA && sp|B8AQW7|PLP1_ORYSI Patatin-like protein 1 OS=Oryza sativa subsp. indica OX=39946 GN=PLP1 PE=3 SV=1 && PF01734:Patatin-like phospholipase	-
Solyc03g063600_3	949.032115259983	1016.68858327173	1063.86048801825	306.440970178912	305.460074713222	380.5083761751	1009.86039551665	330.803140355745	1.60850733871829	8.88494082385502e-30	4.31614110443201e-28	Solyc03g063600_3	3	37406595	37411503	+	2441	protein_coding	NA && sp|Q9M682|GMK2_ARATH Guanylate kinase 2 OS=Arabidopsis thaliana OX=3702 GN=GK-2 PE=2 SV=1 && PF00625:Guanylate kinase	-
Solyc03g096430_1	31.3729624879333	31.6981428964627	43.0237697360321	327.229679211149	376.681335656719	307.616613428025	35.3649583734761	337.175876098631	-3.25510364552343	1.07202059587425e-29	5.19478891223517e-28	Solyc03g096430_1	3	59959994	59960191	+	198	protein_coding	NA && - && -	-
Solyc11g005770_2	47.0594437319	68.0923069627718	49.54252272634	375.736666953037	443.154512537317	387.86442562664	54.8980911403373	402.251868372331	-2.86818001637544	1.66118956017396e-29	8.010125127962e-28	Solyc11g005770_2	11	604752	607515	-	2200	protein_coding	NA && sp|Q9LXD9|PME51_ARATH Probable pectinesterase/pectinesterase inhibitor 51 OS=Arabidopsis thaliana OX=3702 GN=PME51 PE=2 SV=1 && PF04043:Plant invertase/pectin methylesterase inhibitor|PF01095:Pectinesterase	NAC
Solyc01g059965_1	368.632309233216	237.14906907724	357.227663868873	27.7182787096503	12.6615575010662	29.4241978061589	321.003014059776	23.2680113389585	3.77744858241084	1.83917046227521e-29	8.84654548893408e-28	Solyc01g059965_1	1	69321663	69323709	+	1389	protein_coding	NA && sp|Q01413|E13B_SOLLC Glucan endo-1,3-beta-glucosidase B OS=Solanum lycopersicum OX=4081 PE=2 SV=1 && PF00332:Glycosyl hydrolases family 17	FAR1
Solyc07g018010_3	330.72331289363	415.5978735314	368.961419251427	47.7370355555088	15.8269468763327	25.4118071962281	371.760868558819	29.6585965426899	3.64911870532556	1.93309653794143e-29	9.27554679492144e-28	Solyc07g018010_3	7	8842074	8845587	-	1132	protein_coding	NA && sp|Q2HIV9|BH035_ARATH Transcription factor bHLH35 OS=Arabidopsis thaliana OX=3702 GN=BHLH35 PE=2 SV=1 && PF00010:Helix-loop-helix DNA-binding domain	bHLH
Solyc03g026230_1	1588.25622595162	1097.69494845158	1234.65181636432	362.647479784591	219.203214237208	359.777691357124	1306.86766358917	313.876128459641	2.05619218221279	2.3422767193065e-29	1.12114306439764e-27	Solyc03g026230_1	3	3692532	3694115	-	1584	protein_coding	NA && sp|O82752|DTX49_ARATH Protein DETOXIFICATION 49 OS=Arabidopsis thaliana OX=3702 GN=DTX49 PE=2 SV=1 && PF01554:MatE	HD-ZIP
Solyc01g079480_3	1520.28147389444	1674.13154705022	1484.97193119214	479.680212114226	661.566379430708	603.864786794579	1559.7949840456	581.703792779838	1.42319239131053	3.29856841941154e-29	1.57502619382487e-27	Solyc01g079480_3	1	78379256	78379690	-	435	protein_coding	NA && sp|Q9LZP8|BZP53_ARATH bZIP transcription factor 53 OS=Arabidopsis thaliana OX=3702 GN=BZIP53 PE=1 SV=1 && PF00170:bZIP transcription factor	bZIP
Solyc12g057160_1	1677.1462863341	1593.12518187037	1637.51075116534	695.266824300395	648.904821929642	793.784608997968	1635.9274064566	712.652085076002	1.19762629033786	4.30114824154639e-29	2.04874888381396e-27	Solyc12g057160_1	12	64174014	64174412	+	399	protein_coding	NA && - && -	-
Solyc05g006390_1	2117.6749679355	1746.91987518283	2093.8234604869	938.571715196214	753.362671313438	790.440950156359	1986.13943453508	827.458445555337	1.26294912107634	5.20731040417516e-29	2.47435717918779e-27	Solyc05g006390_1	5	1028809	1029063	-	255	protein_coding	NA && - && -	-
Solyc12g094520_2	810.468197604944	676.227048457871	707.936574747438	177.08900286721	219.994561581025	157.151965555621	731.543940270084	184.745176667952	1.98719542592856	6.36422248608923e-29	3.0167647363237e-27	Solyc12g094520_2	12	65716200	65720088	-	1902	protein_coding	NA && sp|M4IQR7|CCL5_HUMLU Probable CoA ligase CCL5 OS=Humulus lupulus OX=3486 GN=CCL5 PE=2 SV=1 && PF00501:AMP-binding enzyme|PF13193:AMP-binding enzyme C-terminal domain	NAC
Solyc03g007230_3	717.656516911474	419.119889408785	642.749044844359	63.9060314694715	104.457849383796	96.2973746383381	593.175150388206	88.2204184972019	2.74785666060881	6.8901281868166e-29	3.25816520563547e-27	Solyc03g007230_3	3	1792367	1798461	+	4902	protein_coding	NA && sp|Q65XK7|P2C51_ORYSJ Protein phosphatase 2C 51 OS=Oryza sativa subsp. japonica OX=39947 GN=PP2C51 PE=1 SV=1 && PF00481:Protein phosphatase 2C	CAMTA
Solyc05g008450_3	750.336686169738	947.422271016497	825.27412857298	254.084221505128	197.836835954159	253.449340193959	841.011028586405	235.123465884415	1.83808923433181	8.86640136099139e-29	4.18259131190671e-27	Solyc05g008450_3	5	2799924	2805239	-	1795	protein_coding	NA && sp|P43394|K502_ACTDE Fruit protein pKIWI502 OS=Actinidia deliciosa OX=3627 GN=pKIWI502 PE=2 SV=1 && PF00175:Oxidoreductase NAD-binding domain	C2H2
Solyc06g068460_3	2435.32621312582	2615.68379160441	2758.7362654983	1268.1112509665	1243.99802447975	968.992332298277	2603.24875674284	1160.36720258151	1.16670124916835	9.00837908259241e-29	4.23935185817095e-27	Solyc06g068460_3	6	42550570	42552589	+	1691	protein_coding	NA && sp|Q9SAH7|WRK40_ARATH Probable WRKY transcription factor 40 OS=Arabidopsis thaliana OX=3702 GN=WRKY40 PE=1 SV=1 && PF03106:WRKY DNA -binding domain	WRKY
Solyc08g075870_3	598.700700811394	443.774000550478	528.01899221494	80.8449795698134	83.8828184445635	38.786442562664	523.497897858937	67.838080192347	2.95392957167889	1.09946103704188e-28	5.16166636023236e-27	Solyc08g075870_3	8	60081062	60085317	+	2377	protein_coding	NA && sp|Q94II3|PMTL_ARATH Probable methyltransferase PMT21 OS=Arabidopsis thaliana OX=3702 GN=ERD3 PE=2 SV=1 && PF03141:Putative S-adenosyl-L-methionine-dependent methyltransferase	NAC
ENSRNA050029895	1309.82118387122	1522.68486432267	1204.6655526089	525.877343296977	365.602472843286	400.570329224754	1345.72386693426	430.683381788339	1.64434982276804	1.46098168149309e-28	6.84249721975841e-27	LSU_rRNA_eukarya	SL3.00SC0000008	1495873	1496378	-	506	rRNA	Eukaryotic large subunit ribosomal RNA && - && -	-
Solyc06g076160_3	390.854824328836	487.212196371557	524.107740420755	93.1642145518802	59.3510507862478	76.9041533570062	467.391587040383	76.4731395650447	2.61101843794608	1.63334398588537e-28	7.63149766388493e-27	Solyc06g076160_3	6	47430845	47431408	-	564	protein_coding	NA && sp|O81970|C71A9_SOYBN Cytochrome P450 71A9 OS=Glycine max OX=3847 GN=CYP71A9 PE=2 SV=1 && PF00067:Cytochrome P450	HSF
Solyc04g064870_3	551.641257079494	476.646148739402	458.920210517676	93.1642145518802	97.3357232894463	58.179663843996	495.735872112191	82.8932005617742	2.58479380850256	1.78652825282074e-28	8.32734847749325e-27	Solyc04g064870_3	4	56043901	56045429	+	790	protein_coding	NA && sp|P16273|PRPX_HORVU Pathogen-related protein OS=Hordeum vulgare OX=4513 PE=2 SV=2 && -	MYB
Solyc01g079600_3	597.393494041063	680.923069627718	574.954013745157	157.070246021352	163.017552826227	123.04664537121	617.756859137979	147.711481406263	2.06705439057104	2.10133204673866e-28	9.77144358171089e-27	Solyc01g079600_3	1	78563878	78568218	-	3229	protein_coding	NA && sp|F4HXL0|PLIP2_ARATH Phospholipase A1 PLIP2, chloroplastic OS=Arabidopsis thaliana OX=3702 GN=PLIP2 PE=1 SV=1 && PF01764:Lipase (class 3)	-
Solyc11g071620_2	201.309842630905	275.891243728472	299.862637554163	914.70319741846	858.611868041051	999.085261872758	259.021241304514	924.13344244409	-1.83452958377776	2.3353101465281e-28	1.08337361939764e-26	Solyc11g071620_2	11	55304303	55343789	+	14460	protein_coding	NA && sp|Q7G193|ALDO1_ARATH Indole-3-acetaldehyde oxidase OS=Arabidopsis thaliana OX=3702 GN=AAO1 PE=1 SV=2 && PF03450:CO dehydrogenase flavoprotein C-terminal domain|PF02738:Molybdopterin-binding domain of aldehyde dehydrogenase|PF00941:FAD binding domain in molybdopterin dehydrogenase|PF00111:2Fe-2S iron-sulfur cluster binding domain|PF01799:[2Fe-2S] binding domain|PF01315:Aldehyde oxidase and …	-
Solyc06g009270_3	722.885343992797	852.327842327109	763.997850464086	227.905847168236	132.946353761195	163.170551470517	779.73701226133	174.674250799983	2.15877228661881	2.46147029095344e-28	1.13920103749398e-26	Solyc06g009270_3	6	3225166	3235341	-	1950	protein_coding	NA && sp|F4JQ95|DGK7_ARATH Diacylglycerol kinase 7 OS=Arabidopsis thaliana OX=3702 GN=DGK7 PE=1 SV=1 && PF00609:Diacylglycerol kinase accessory domain|PF00781:Diacylglycerol kinase catalytic domain	-
Solyc01g091910_3	479.744884711314	645.70291085387	586.687769127711	140.901250107389	113.162670165779	119.034254761279	570.711854897632	124.366058344816	2.1990430949977	2.55617042720572e-28	1.18023935031619e-26	Solyc01g091910_3	1	85312254	85326068	-	6069	protein_coding	NA && sp|P93733|PLDB1_ARATH Phospholipase D beta 1 OS=Arabidopsis thaliana OX=3702 GN=PLDBETA1 PE=1 SV=4 && PF03634:TCP family transcription factor	TALE
Solyc09g092520_3	860.142054877505	1064.82280026265	1054.73423383182	344.93857949787	273.01483361674	328.347298246	993.233029657326	315.433570453537	1.65446281924982	3.44157352213902e-28	1.58531023159801e-26	Solyc09g092520_3	9	72053343	72055598	-	1265	protein_coding	NA && sp|P35694|XTH2_SOYBN Xyloglucan endotransglucosylase/hydrolase 2 OS=Glycine max OX=3847 PE=2 SV=1 && PF06955:Xyloglucan endo-transglycosylase (XET) C-terminus|PF00722:Glycosyl hydrolases family 16	NAC
Solyc02g090820_3	1934.66602008922	2016.941092449	1865.66710582612	781.501469174863	921.919655546382	968.323600529956	1939.09140612145	890.581575083733	1.12215981863498	6.21779629858939e-28	2.85741310181889e-26	Solyc02g090820_3	2	52939910	52942863	-	1307	protein_coding	NA && sp|P22335|HSF24_SOLPE Heat shock factor protein HSF24 OS=Solanum peruvianum OX=4082 GN=HSF24 PE=2 SV=1 && PF00447:HSF-type DNA-binding	HSF
Solyc03g098700_1	1066.68072458973	1156.39521307466	1544.94445870297	1.53990437275835	0	0	1256.00679878912	0.513301457586117	11.31429023898	6.83409079528438e-28	3.13327858312136e-26	Solyc03g098700_1	3	62415236	62415895	-	660	protein_coding	NA && sp|O24384|CPI8_SOLTU Cysteine protease inhibitor 8 (Fragment) OS=Solanum tuberosum OX=4113 PE=2 SV=1 && PF00197:Trypsin and protease inhibitor	-
Solyc07g009080_3	265.362974377103	292.327317822934	164.272575355759	1127.97995304549	862.568604760134	1067.29590224158	240.654289185265	1019.2814866824	-2.0807270736625	7.13091895467611e-28	3.26172898074052e-26	Solyc07g009080_3	7	4037471	4038069	-	366	protein_coding	NA && - && -	-
Solyc08g077480_3	62.7459249758666	44.6122011135401	39.1125179418474	340.318866379595	383.803461751069	385.189498553353	48.8235480104181	369.770608894672	-2.92300781484598	8.51341702231677e-28	3.88501550223532e-26	Solyc08g077480_3	8	61554348	61555982	+	908	protein_coding	NA && sp|Q8VZM9|FLZ2_ARATH FCS-Like Zinc finger 2 OS=Arabidopsis thaliana OX=3702 GN=FLZ2 PE=1 SV=1 && PF04570:zinc-finger of the FCS-type, C2-C2	-
Solyc01g107200_3	420.920580046439	538.868429239866	492.817726067277	60.0562705375756	95.7530286018131	92.9537157967292	484.202245117861	82.921004978706	2.5449612845596	8.64667773301447e-28	3.93665139486568e-26	Solyc01g107200_3	1	94717961	94729939	-	3538	protein_coding	NA && sp|Q94AI1|QWRF2_ARATH QWRF motif-containing protein 2 OS=Arabidopsis thaliana OX=3702 GN=QWRF2 PE=2 SV=1 && PF04484:QWRF family	-
Solyc08g076335_1	933.345634016016	896.940043440649	853.956641730335	311.830635483566	220.785908924842	279.529879158509	894.747439729	270.715474522306	1.72402054710579	8.95399553704486e-28	4.06710836725585e-26	Solyc08g076335_1	8	60428238	60429119	-	300	protein_coding	NA && sp|P49689|RS30_ARATH 40S ribosomal protein S30 OS=Arabidopsis thaliana OX=3702 GN=RPS30A PE=3 SV=3 && -	-
Solyc09g082060_3	1278.44822138328	1391.19627156697	1162.94553347093	2455.37752236319	2476.91718614607	2778.58049737705	1277.53000880706	2570.29173529544	-1.00819353676262	9.87891516962985e-28	4.47684079342231e-26	Solyc09g082060_3	9	68325515	68330837	+	1571	protein_coding	NA && sp|O81154|CYSK_SOLTU Cysteine synthase OS=Solanum tuberosum OX=4113 PE=2 SV=1 && PF00291:Pyridoxal-phosphate dependent enzyme	GeBP
Solyc05g007560_3	1458.8427556889	1412.32836683128	1241.17056935462	602.872561934894	508.836342074098	472.124628435186	1370.78056395827	527.944510814726	1.37742753581137	1.60655468573382e-27	7.2636307350141e-26	Solyc05g007560_3	5	2100635	2103403	-	778	protein_coding	NA && sp|P41098|RL34_TOBAC 60S ribosomal protein L34 OS=Nicotiana tabacum OX=4097 GN=RPL34 PE=2 SV=1 && PF01199:Ribosomal protein L34e	LSD
Solyc06g076040_3	224.839564496855	361.593630078167	276.395126789055	957.820519855694	1001.84573727186	1073.31448815648	287.609440454693	1010.99358176134	-1.81113720706462	1.70781659155416e-27	7.70366944996679e-26	Solyc06g076040_3	6	47351873	47356685	-	2334	protein_coding	NA && sp|Q9SNC6|PUB13_ARATH U-box domain-containing protein 13 OS=Arabidopsis thaliana OX=3702 GN=PUB13 PE=1 SV=1 && PF04564:U-box domain|PF00514:Armadillo/beta-catenin-like repeat	bHLH
Solyc11g005860_2	861.449261647836	956.814313356189	1002.58420990935	208.657042508756	293.589864555972	157.151965555621	940.282594971127	219.799624206783	2.09977311096114	2.79842340220308e-27	1.25941919413631e-25	Solyc11g005860_2	11	687087	692264	+	4275	protein_coding	NA && sp|F4KF16|OFT38_ARATH O-fucosyltransferase 38 OS=Arabidopsis thaliana OX=3702 GN=OFUT38 PE=2 SV=1 && PF00266:Aminotransferase class-V	NAC
Solyc06g007520_3	1393.48241717237	1667.08751529545	1357.2043725821	646.759836558507	587.971076455761	539.666537035687	1472.59143501664	591.465816683318	1.31718860802086	2.94519138255166e-27	1.32243146092234e-25	Solyc06g007520_3	6	1510971	1513575	+	1093	protein_coding	NA && sp|P93847|RL10_SOLME 60S ribosomal protein L10 OS=Solanum melongena OX=4111 GN=RPL10 PE=2 SV=1 && PF00252:Ribosomal protein L16p/L10e	bZIP
Solyc01g073890_3	424.84220035743	507.170286343404	599.725275108327	60.0562705375756	79.9260817254803	106.997082931487	510.579253936387	82.3264783981809	2.62872675417643	3.06320237806885e-27	1.37227260767629e-25	Solyc01g073890_3	1	81096088	81104284	+	3328	protein_coding	NA && - && PF03107:C1 domain	LBD
Solyc02g085910_3	150.328778588014	180.796815039084	114.730052629419	604.412466307652	656.818295367809	675.419086005011	148.618548752172	645.549949226824	-2.11613222280892	3.46846610353716e-27	1.55027764632299e-25	Solyc02g085910_3	2	49328482	49329623	-	1054	protein_coding	NA && sp|Q9M886|LBD41_ARATH LOB domain-containing protein 41 OS=Arabidopsis thaliana OX=3702 GN=LBD41 PE=2 SV=1 && PF03195:Lateral organ boundaries (LOB) domain	LBD
Solyc07g054770_1	16.9936880142972	9.39204233969266	32.5937649515395	331.849392329424	272.223486272923	297.585636903198	19.6598317685098	300.552838501848	-3.94764546506597	3.78444879796614e-27	1.68765726919779e-25	Solyc07g054770_1	7	63109341	63109610	-	270	protein_coding	NA && - && -	Nin-like
Solyc02g078500_2	456.215162845364	293.501323115396	288.128882171609	42.3473702508546	37.9846725031986	22.7368801229409	345.948456044123	34.3563076256647	3.33810607023795	4.41859953781585e-27	1.96597552617775e-25	Solyc02g078500_2	2	43733333	43735828	+	1289	protein_coding	NA && - && PF12481:Aluminium induced protein	NAC
Solyc08g068710_1	380.397170166191	453.166042890171	307.685141142533	35.4178005734421	62.5164401615143	48.1486873191691	380.416118066298	48.6943093513751	2.96755115824266	4.51442995314008e-27	2.00405884790529e-25	Solyc08g068710_1	8	57905614	57906318	-	705	protein_coding	NA && sp|Q9SMB8|THT11_TOBAC Tyramine N-feruloyltransferase 4/11 OS=Nicotiana tabacum OX=4097 GN=THT4 PE=2 SV=1 && PF00583:Acetyltransferase (GNAT) family	-
Solyc01g098760_3	1279.75542815361	1189.26736126358	1168.16053586318	488.149686164397	542.072930514396	506.229948619597	1212.39444176012	512.150855099463	1.24333614698072	5.50420438021793e-27	2.43791423419743e-25	Solyc01g098760_3	1	89059098	89080069	+	2368	protein_coding	NA && sp|Q8LA32|LUL4_ARATH Probable E3 ubiquitin-protein ligase LUL4 OS=Arabidopsis thaliana OX=3702 GN=LUL4 PE=2 SV=1 && PF00403:Heavy-metal-associated domain|PF13920:Zinc finger, C3HC4 type (RING finger)	C3H
Solyc05g012110_3	296.735936865036	273.543233143549	224.245102866592	775.341851683829	948.034117892331	1038.54043620374	264.841424291725	920.638801926635	-1.79754313506761	5.60920170317513e-27	2.47881132602843e-25	Solyc05g012110_3	5	5316485	5320257	-	1287	protein_coding	NA && sp|Q9LMX8|6PGL1_ARATH Probable 6-phosphogluconolactonase 1 OS=Arabidopsis thaliana OX=3702 GN=PGL1 PE=2 SV=1 && PF01182:Glucosamine-6-phosphate isomerases/6-phosphogluconolactonase	-
Solyc03g112340_1	385.625997247514	422.64190528617	396.34018181072	1118.74052680894	1134.00074368924	968.992332298277	401.536028114801	1073.91120093215	-1.41822300984673	5.62766403534635e-27	2.48136889234179e-25	Solyc03g112340_1	3	64251788	64252984	+	1197	protein_coding	NA && sp|Q8LGA5|ATL31_ARATH E3 ubiquitin-protein ligase ATL31 OS=Arabidopsis thaliana OX=3702 GN=ATL31 PE=1 SV=2 && PF13639:Ring finger domain	C3H
Solyc11g072600_2	332.030519663961	354.549598323398	371.56892044755	53.1267008601631	60.1423981300644	64.1982497588921	352.71634614497	59.1557829163732	2.57445650883292	6.187342030125e-27	2.72201336907319e-25	Solyc11g072600_2	11	56068300	56071320	-	1584	protein_coding	NA && sp|Q9SK03|RAP27_ARATH Ethylene-responsive transcription factor RAP2-7 OS=Arabidopsis thaliana OX=3702 GN=RAP2-7 PE=2 SV=2 && PF00847:AP2 domain	AP2
Solyc01g106320_2	955.568149111635	795.975588288953	1148.60427689225	2358.36354687941	2178.5792375272	2272.35054875745	966.71600476428	2269.76444438802	-1.23254859258481	6.51812875429945e-27	2.85470708328681e-25	Solyc01g106320_2	1	94139441	94141307	-	1867	protein_coding	NA && - && PF00564:PB1 domain	MYB
Solyc06g084020_3	559.484497701477	577.610603891098	478.4764694886	1304.29900372632	1370.61359949042	1250.52840676175	538.523857027059	1308.4803366595	-1.27984299628719	6.71028783587752e-27	2.9323059143521e-25	Solyc06g084020_3	6	49330532	49331460	-	635	protein_coding	NA && sp|P37218|H1_SOLLC Histone H1 OS=Solanum lycopersicum OX=4081 PE=3 SV=1 && PF00538:linker histone H1 and H5 family	Nin-like
novel.644	407.848512343133	308.763391917396	440.667702144814	39.2675615053379	61.7250928176977	28.0867342695153	385.759868801781	43.0264628641836	3.17103166569096	7.0335760288409e-27	3.06673313845475e-25	-	3	61466979	61471067	-	4089	-	- && - && -	-
Solyc01g090610_3	79.7396129901638	52.8302381607712	61.2762781088943	432.713128745096	459.772806757466	357.771496052159	64.6153764199431	416.752477184907	-2.6921216220504	8.09669165747615e-27	3.52242072396468e-25	Solyc01g090610_3	1	84149864	84151694	+	1196	protein_coding	NA && sp|A0A0N9HQ36|2ODD_SINHE Deoxypodophyllotoxin synthase OS=Sinopodophyllum hexandrum OX=93608 GN=2-ODD PE=1 SV=1 && PF03171:2OG-Fe(II) oxygenase superfamily|PF14226:non-haem dioxygenase in morphine synthesis N-terminal	C3H
Solyc10g083860_2	103.269334856114	98.6164445667729	71.7062828933869	464.281168386642	502.505563323565	452.062675385532	91.1973541054245	472.949802365246	-2.37312020230293	8.19846411450906e-27	3.55878784855308e-25	Solyc10g083860_2	10	63718039	63726003	-	2168	protein_coding	NA && sp|Q9ZQ94|U73C5_ARATH UDP-glycosyltransferase 73C5 OS=Arabidopsis thaliana OX=3702 GN=UGT73C5 PE=2 SV=1 && PF00023:Ankyrin repeat|PF12796:Ankyrin repeats (3 copies)|PF00201:UDP-glucoronosyl and UDP-glucosyl transferase	ERF
Solyc03g098740_1	1549.04002284171	1204.52943006558	1187.7167948341	2682.51341734505	2787.91669226601	2785.93654682859	1313.76208258046	2752.12221881322	-1.06742523787136	8.29880459119134e-27	3.59437383809188e-25	Solyc03g098740_1	3	62445759	62446358	-	600	protein_coding	NA && sp|P24924|ITRY_ACACO Trypsin inhibitor OS=Acacia confusa OX=3809 GN=ACTI PE=1 SV=2 && PF00197:Trypsin and protease inhibitor	-
Solyc05g011980_3	130.720677033055	64.570291085387	109.515050237173	589.013422580069	569.770087547979	551.703708865479	101.602006118538	570.162406331175	-2.49356348029975	8.36507668374466e-27	3.61507960789557e-25	Solyc05g011980_3	5	5192172	5193155	-	984	protein_coding	NA && - && -	-
Solyc11g012320_2	1423.54817288997	1062.47478967773	946.522934192707	2743.339640069	2683.45884288222	2734.44420066781	1144.1819655868	2720.41422787301	-1.24994143916735	9.68621519274343e-27	4.17680693454489e-25	Solyc11g012320_2	11	5177522	5178924	+	565	protein_coding	NA && sp|P33191|TUB8_SOLTU Induced stolen tip protein TUB8 (Fragment) OS=Solanum tuberosum OX=4113 GN=TUB8 PE=2 SV=1 && -	-
Solyc01g094410_3	350.331414448589	189.014852086315	375.480172241735	1218.06435885185	1136.37478572069	1411.02403115898	304.942146258879	1255.15439191051	-2.04428337452532	1.62786250637034e-26	6.98874216824829e-25	Solyc01g094410_3	1	85784997	85789865	+	3555	protein_coding	NA && sp|Q9M2R0|FTIP3_ARATH FT-interacting protein 3 OS=Arabidopsis thaliana OX=3702 GN=FTIP3 PE=1 SV=1 && PF08372:Plant phosphoribosyltransferase C-terminal|PF00168:C2 domain	bZIP
Solyc06g009640_2	905.894291839074	934.508212799419	787.465361229194	230.215703727373	311.790853463755	272.842561475291	875.955955289229	271.616372888807	1.68980708201384	1.78620531586853e-26	7.65175962117246e-25	Solyc06g009640_2	6	3583765	3586420	-	1195	protein_coding	NA && sp|Q9LZP8|BZP53_ARATH bZIP transcription factor 53 OS=Arabidopsis thaliana OX=3702 GN=BZIP53 PE=1 SV=1 && PF00170:bZIP transcription factor	bZIP
Solyc05g008220_3	664.061039327922	625.744820882023	482.387721282785	118.572636702393	119.493448916312	155.145770250656	590.73119383091	131.07061862312	2.16998753854929	2.0948560114069e-26	8.95436596840892e-25	Solyc05g008220_3	5	2614904	2616511	+	573	protein_coding	NA && sp|Q6NLC8|Y1648_ARATH Uncharacterized protein At1g66480 OS=Arabidopsis thaliana OX=3702 GN=At1g66480 PE=2 SV=1 && PF14009:Domain of unknown function (DUF4228)	-
Solyc03g117420_3	611.7727685147	673.879037872948	559.309006568418	1318.92809526753	1589.81681372762	1589.5754133009	614.986937652022	1499.44010743202	-1.28509327479929	2.98102291257813e-26	1.27144848713599e-24	Solyc03g117420_3	3	68033366	68053906	-	7225	protein_coding	NA && sp|Q94AI7|TPL_ARATH Protein TOPLESS OS=Arabidopsis thaliana OX=3702 GN=TPL PE=1 SV=1 && PF13855:Leucine rich repeat	LSD
Solyc09g083100_1	460.136783156355	488.386201664018	355.923913270811	85.4646926880884	75.1779976625805	87.6038616501548	434.815632697062	82.7488506669413	2.39295352742082	3.16547174286419e-26	1.34202203965254e-24	Solyc09g083100_1	9	69208419	69209723	+	1305	protein_coding	NA && sp|Q9XIW0|CIPK7_ARATH CBL-interacting serine/threonine-protein kinase 7 OS=Arabidopsis thaliana OX=3702 GN=CIPK7 PE=1 SV=1 && PF00069:Protein kinase domain|PF03822:NAF domain	bHLH
Solyc12g088190_2	343.795380596936	154.968698604929	174.702580140252	3.0798087455167	3.16538937526655	0	224.488886447372	2.08173270692775	6.81144796031715	3.16705410593796e-26	1.34202203965254e-24	Solyc12g088190_2	12	64612800	64619999	+	1936	protein_coding	NA && sp|P92934|AAP6_ARATH Amino acid permease 6 OS=Arabidopsis thaliana OX=3702 GN=AAP6 PE=1 SV=1 && PF01490:Transmembrane amino acid transporter protein	MYB_related
Solyc09g090790_3	347.717000907928	237.14906907724	250.320114827823	20.7887090322377	3.95673671908318	18.7244895130102	278.395394937663	14.4899784214437	4.25298116160889	3.36300916327685e-26	1.42197905808792e-24	Solyc09g090790_3	9	70677950	70680826	-	2653	protein_coding	NA && sp|Q10MB4|MYB2_ORYSJ Transcription factor MYB2 OS=Oryza sativa subsp. japonica OX=39947 GN=MYB2 PE=2 SV=1 && PF13041:PPR repeat family	MYB
Solyc03g117675_1	836.612333011555	1080.08486906466	770.516603454394	277.952739282882	215.246477518125	269.498902633682	895.737935176868	254.23270647823	1.81682911352525	3.84458017326084e-26	1.62209797525706e-24	Solyc03g117675_1	3	68235406	68238896	-	1726	protein_coding	NA && - && -	C2H2
Solyc11g069700_2	341.180967056275	260.629174926471	444.578953938999	1188.03622358307	1087.31125040406	1235.81630785867	348.796365307248	1170.38792728193	-1.7488269438045	5.12955757889355e-26	2.15959889724729e-24	Solyc11g069700_2	11	54602015	54604909	+	1857	protein_coding	NA && sp|P17786|EF1A_SOLLC Elongation factor 1-alpha OS=Solanum lycopersicum OX=4081 PE=2 SV=1 && PF00009:Elongation factor Tu GTP binding domain|PF03143:Elongation factor Tu C-terminal domain|PF03144:Elongation factor Tu domain 2	-
Solyc10g081040_1	1513.74544004278	1483.94268967144	1690.96452568587	708.356011468841	771.563660221221	691.468648444734	1562.8842184667	723.796106711599	1.11079126912967	5.21255091678373e-26	2.18983067162822e-24	Solyc10g081040_1	10	62345412	62345999	+	588	protein_coding	NA && sp|O80683|CAB25_ARATH Calmodulin-binding protein 25 OS=Arabidopsis thaliana OX=3702 GN=CAMBP25 PE=1 SV=1 && PF05678:VQ motif	-
Solyc09g059270_3	315.036831649664	325.199466011858	303.773889348348	852.337070321747	1096.01607118604	890.081983636306	314.670062336623	946.145041714698	-1.58752716589761	6.34787164041141e-26	2.66107672600287e-24	Solyc09g059270_3	9	54391836	54395665	+	1303	protein_coding	NA && sp|O44017|ERD2_ENTHI ER lumen protein-retaining receptor OS=Entamoeba histolytica OX=5759 GN=ERD2 PE=3 SV=1 && PF00810:ER lumen protein retaining receptor	M-type_MADS
Solyc11g071470_1	299.350350405697	314.633418379704	239.890110043331	23.8685177777544	36.4019778155653	36.1115154893768	284.624626276244	32.1273370275655	3.14556554841168	6.63540991203233e-26	2.77567136427045e-24	Solyc11g071470_1	11	55224732	55226063	+	1332	protein_coding	NA && sp|Q7XPK7|AHT1_ORYSJ Agmatine hydroxycinnamoyltransferase 1 OS=Oryza sativa subsp. japonica OX=39947 GN=AHT1 PE=1 SV=1 && PF02458:Transferase family	FAR1
Solyc04g074680_1	679.747520571888	517.736333975558	810.932871994303	163.999815698764	152.730037356611	165.845478543805	669.472242180583	160.858443866393	2.05598533214592	7.82764536664695e-26	3.26741606274728e-24	Solyc04g074680_1	4	60686311	60686808	-	498	protein_coding	NA && - && -	-
Solyc05g054380_2	290.199903013383	266.499201388779	285.521380975486	3.0798087455167	0	0	280.740161792549	1.02660291517223	8.1488926569016	9.19356936142756e-26	3.82941505082271e-24	Solyc05g054380_2	5	65152840	65155055	-	835	protein_coding	NA && sp|P17642|PRS2_SOLTU Pathogenesis-related protein STH-2 OS=Solanum tuberosum OX=4113 GN=STH-2 PE=2 SV=1 && PF00407:Pathogenesis-related protein Bet v I family	-
ENSRNA050029905	322.880072271647	348.67957186109	380.695174633981	66.215888028609	60.1423981300644	59.5171273806395	350.751606255573	61.958471179771	2.50165003801479	9.26904277394416e-26	3.8526549975691e-24	SSU_rRNA_eukarya	SL3.00SC0000037	5436	5945	+	510	rRNA	Eukaryotic small subunit ribosomal RNA && - && -	-
Solyc10g078220_2	15.6864812439667	15.2620688020006	28.6825131573548	210.966899067894	313.373548151388	312.297735806277	19.877021067774	278.879394341853	-3.81650744912785	1.03108239302487e-25	4.27658898479829e-24	Solyc10g078220_2	10	60205498	60208109	-	1763	protein_coding	NA && sp|O22203|C98A3_ARATH Cytochrome P450 98A3 OS=Arabidopsis thaliana OX=3702 GN=CYP98A3 PE=1 SV=1 && PF00067:Cytochrome P450	MYB
Solyc11g011030_2	296.735936865036	343.983550691244	233.371357053023	36.9577049462004	15.8269468763327	17.3870259763666	291.363614869767	23.3905592662999	3.64340202524015	1.07969455758652e-25	4.46874848919053e-24	Solyc11g011030_2	11	4085805	4089166	+	963	protein_coding	NA && sp|Q9M723|JAZ7_SOLLC Protein JAZ7 OS=Solanum lycopersicum OX=4081 GN=JAZ7 PE=1 SV=1 && PF09425:Divergent CCT motif|PF06200:tify domain	-
Solyc11g045150_1	911.123118920397	825.325720600492	870.905399505135	326.45972702477	306.251422057038	331.690957087609	869.118079675341	321.467368723139	1.43414120986583	1.30983869691281e-25	5.40985488807217e-24	Solyc11g045150_1	11	31816637	31816915	-	279	protein_coding	NA && sp|P93276|M030_ARATH Uncharacterized mitochondrial protein AtMg00030 OS=Arabidopsis thaliana OX=3702 GN=AtMg00030 PE=4 SV=1 && -	-
Solyc06g084230_3	945.110494948991	1092.99892728173	1089.93549997948	435.022985304234	386.968851126335	371.146131418595	1042.68164073674	397.712655949721	1.39132051568173	1.65081324960109e-25	6.80378336577693e-24	Solyc06g084230_3	6	49456180	49459164	-	815	protein_coding	NA && sp|Q9SS17|RS241_ARATH 40S ribosomal protein S24-1 OS=Arabidopsis thaliana OX=3702 GN=RPS24A PE=2 SV=1 && PF01282:Ribosomal protein S24e	-
Solyc01g007020_3	1173.87167975684	842.935799987416	886.550406681874	306.440970178912	318.121632214288	319.653785257817	967.785962142043	314.738795883672	1.6199028403738	2.37918096171472e-25	9.76461754454696e-24	Solyc01g007020_3	1	1576500	1577252	-	753	protein_coding	NA && sp|Q9SVC6|PUB22_ARATH E3 ubiquitin-protein ligase PUB22 OS=Arabidopsis thaliana OX=3702 GN=PUB22 PE=1 SV=1 && -	Dof
Solyc01g080890_2	800.010543442299	565.870550966483	607.547778696696	165.539720071523	133.737701105012	177.882650373597	657.809624368493	159.053357183377	2.04604458193788	2.57991182947803e-25	1.05663041601865e-23	Solyc01g080890_2	1	80070459	80071078	+	620	protein_coding	NA && - && -	Dof
Solyc03g098720_3	884.978983513785	773.669487732183	574.954013745157	0	0	0	744.534161663708	0	12.4147205885388	3.04941108689066e-25	1.24631149995947e-23	Solyc03g098720_3	3	62430435	62431405	+	820	protein_coding	NA && - && PF00197:Trypsin and protease inhibitor	-
Solyc02g071780_3	771.251994495027	664.486995533255	702.721572355192	244.074843082198	189.923362515993	183.901236288493	712.820187461158	205.966480628895	1.7918008629312	3.31130761240788e-25	1.35053060683561e-23	Solyc02g071780_3	2	41696450	41702639	-	1992	protein_coding	NA && sp|Q9C7N2|CAD1_ARATH MACPF domain-containing protein CAD1 OS=Arabidopsis thaliana OX=3702 GN=CAD1 PE=2 SV=1 && PF01823:MAC/Perforin domain	-
Solyc07g009030_3	26.1441354066111	39.9161799436938	20.8600095689853	274.102978350986	286.467738461623	305.610418123059	28.9734416397634	288.727044978556	-3.30829800467396	3.52652215354458e-25	1.43531651143331e-23	Solyc07g009030_3	7	4015660	4016275	-	494	protein_coding	NA && - && -	-
Solyc07g055690_2	470.594437319	779.539514194491	709.2403253455	1988.01654523103	1928.51347688114	1679.18547025602	653.124758952997	1865.23849745607	-1.51254904369228	4.53178137221476e-25	1.84063659593046e-23	Solyc07g055690_2	7	63754159	63764581	-	3936	protein_coding	NA && sp|Q8RWZ5|SD25_ARATH G-type lectin S-receptor-like serine/threonine-protein kinase SD2-5 OS=Arabidopsis thaliana OX=3702 GN=SD25 PE=1 SV=1 && PF01453:D-mannose binding lectin|PF05699:hAT family C-terminal dimerisation region|PF00069:Protein kinase domain	ERF
Solyc11g010270_2	305.88638425735	152.620688020006	276.395126789055	1090.25229591291	968.609148831564	970.998527603243	244.967399688803	1009.95332411591	-2.04680836169148	4.73515052782999e-25	1.91925552553474e-23	Solyc11g010270_2	11	3354630	3357745	-	1656	protein_coding	NA && sp|P46667|ATHB5_ARATH Homeobox-leucine zipper protein ATHB-5 OS=Arabidopsis thaliana OX=3702 GN=ATHB-5 PE=1 SV=1 && PF02183:Homeobox associated leucine zipper|PF00046:Homeodomain	HD-ZIP
Solyc02g061770_3	865.370881958827	813.585667675876	754.871596277655	1.53990437275835	0	0	811.276048637453	0.513301457586117	10.6838618940142	5.14152672784833e-25	2.07966257750179e-23	Solyc02g061770_3	2	33833702	33835354	+	869	protein_coding	NA && sp|Q05537|CHID_SOLLC Basic endochitinase (Fragment) OS=Solanum lycopersicum OX=4081 GN=CHI14 PE=2 SV=1 && PF00182:Chitinase class I	NAC
Solyc02g090380_3	70.58916559785	54.0042434532328	71.7062828933869	456.581646522851	322.869716277188	445.375357702314	65.4332306481566	408.275573500784	-2.64490626410584	6.77797793765075e-25	2.73029782068701e-23	Solyc02g090380_3	2	52570426	52578827	+	3396	protein_coding	NA && sp|Q9FKZ1|DRL42_ARATH Probable disease resistance protein At5g66900 OS=Arabidopsis thaliana OX=3702 GN=At5g66900 PE=3 SV=1 && PF05659:Arabidopsis broad-spectrum mildew resistance protein RPW8|PF00931:NB-ARC domain|PF07727:Reverse transcriptase (RNA-dependent DNA polymerase)	LBD
Solyc08g007830_1	566.02053155313	933.334207506958	637.534042452113	0	0	0	712.296260504067	0	12.351524416235	6.84253538769649e-25	2.7506430243313e-23	Solyc08g007830_1	8	2339145	2339834	-	690	protein_coding	NA && sp|Q9LN86|DRE1F_ARATH Dehydration-responsive element-binding protein 1F OS=Arabidopsis thaliana OX=3702 GN=DREB1F PE=2 SV=1 && PF00847:AP2 domain	ERF
Solyc07g054850_3	54.9026843538833	18.7840846793853	20.8600095689853	356.487862293558	345.81878924787	343.728128917401	31.515592867418	348.678260152943	-3.4761618592309	9.54197108555678e-25	3.82793376930215e-23	Solyc07g054850_3	7	63159014	63160707	+	1601	protein_coding	NA && sp|Q9SUC9|UGPI7_ARATH Uncharacterized GPI-anchored protein At4g28100 OS=Arabidopsis thaliana OX=3702 GN=At4g28100 PE=2 SV=1 && -	MYB_related
Solyc10g076510_2	250.983699903466	186.666841501392	138.197563394527	748.393525160558	746.240545219089	827.889929182379	191.949368266462	774.174666520675	-2.01250791624008	1.21217783771985e-24	4.85292546606165e-23	Solyc10g076510_2	10	59602959	59606619	-	2318	protein_coding	NA && sp|O82647|PDC1_ARATH Pyruvate decarboxylase 1 OS=Arabidopsis thaliana OX=3702 GN=PDC1 PE=2 SV=1 && PF02776:Thiamine pyrophosphate enzyme, N-terminal TPP binding domain|PF00205:Thiamine pyrophosphate enzyme, central domain|PF02775:Thiamine pyrophosphate enzyme, C-terminal TPP binding domain	NF-YC
Solyc12g013620_2	375.168343084869	441.425989965555	417.200191379706	64.6759836558507	96.5443759456297	76.9041533570062	411.26484147671	79.3748376528289	2.37474563152514	1.82209638193143e-24	7.27983283042279e-23	Solyc12g013620_2	12	4461663	4464796	-	1557	protein_coding	NA && sp|Q9SQL0|JA2_SOLLC NAC domain-containing protein JA2 OS=Solanum lycopersicum OX=4081 GN=JA2 PE=2 SV=1 && PF02365:No apical meristem (NAM) protein	NAC
Solyc06g053310_3	593.471873730072	410.901852361554	520.19648862657	1234.23335476582	1429.96465027666	1399.65559109751	508.190071572732	1354.61786538	-1.41613878429125	1.84146297280599e-24	7.342224158579e-23	Solyc06g053310_3	6	36142345	36151320	+	1499	protein_coding	NA && sp|Q8LDW8|GLO2D_ARATH Probable hydroxyacylglutathione hydrolase 2, chloroplastic OS=Arabidopsis thaliana OX=3702 GN=GLX2-4 PE=2 SV=1 && PF16123:Hydroxyacylglutathione hydrolase C-terminus|PF00753:Metallo-beta-lactamase superfamily	-
Solyc10g083760_2	1045.76541626444	841.761794694954	825.27412857298	1837.87586888709	2006.85686391899	1934.64100575495	904.267113177459	1926.45791285368	-1.09169441416359	2.19730986223658e-24	8.72550409188752e-23	Solyc10g083760_2	10	63636332	63642888	-	3094	protein_coding	NA && sp|A0FKE6|TD1_SOLLC Threonine dehydratase 1 biosynthetic, chloroplastic OS=Solanum lycopersicum OX=4081 GN=TD1 PE=1 SV=1 && PF00585:C-terminal regulatory domain of Threonine dehydratase|PF00291:Pyridoxal-phosphate dependent enzyme	Trihelix
Solyc01g010230_2	39.2162031099166	46.9602116984633	39.1125179418474	307.210922365291	317.330284870471	283.54226976844	41.7629775834091	302.694492334734	-2.85458536608872	2.39118951890406e-24	9.47617757319531e-23	Solyc01g010230_2	1	4944037	4944699	-	663	protein_coding	NA && - && -	-
Solyc03g119210_1	167.322466602311	153.794693312467	168.183827149944	741.463955483145	683.724105057574	515.592193376102	163.100329021574	646.926751305607	-1.98789630560169	2.48121800245117e-24	9.81309188565387e-23	Solyc03g119210_1	3	69355846	69356127	+	282	protein_coding	NA && sp|P86809|NLTP2_APIGA Non-specific lipid-transfer protein 2 OS=Apium graveolens var. rapaceum OX=278110 PE=1 SV=1 && -	bHLH
Solyc11g007020_2	848.37719394453	687.967101382487	847.437888740027	251.77436494599	235.821508457358	166.514210312126	794.594061355681	218.036694571825	1.86745684662869	2.59306573714644e-24	1.02156498049337e-22	Solyc11g007020_2	11	1509821	1516539	+	2355	protein_coding	NA && sp|F8QQQ7|MVD2_PANGI Diphosphomevalonate decarboxylase 2 OS=Panax ginseng OX=4054 GN=MVD2 PE=2 SV=1 && PF00288:GHMP kinases N terminal domain|PF18376:Mevalonate 5-diphosphate decarboxylase C-terminal domain	GATA
Solyc04g072660_3	1074.52396521172	1220.96550416005	1039.08922665508	365.727288530108	476.391100977615	416.619891664477	1111.52623200895	419.5794270574	1.40623305519013	2.59344023755021e-24	1.02156498049337e-22	Solyc04g072660_3	4	59711978	59713671	-	600	protein_coding	NA && sp|O49884|RL30_LUPLU 60S ribosomal protein L30 OS=Lupinus luteus OX=3873 GN=RPL30 PE=3 SV=1 && PF01248:Ribosomal protein L7Ae/L30e/S12e/Gadd45 family	-
Solyc08g081240_3	1534.66074836807	1003.77452505465	1041.6967278512	312.600587669945	402.004450658852	375.158522028526	1193.37733375798	363.254520119107	1.7154936800923	2.72703754267014e-24	1.07203240909344e-22	Solyc08g081240_3	8	64414715	64418703	-	1510	protein_coding	NA && sp|Q9SRE5|Y1666_ARATH Uncharacterized protein At1g76660 OS=Arabidopsis thaliana OX=3702 GN=At1g76660 PE=2 SV=1 && -	LBD
Solyc01g097520_3	317.651245190325	467.25410639971	657.090301423036	66.215888028609	83.8828184445635	56.1734685390306	480.665217671024	68.7573916707344	2.80817001041983	2.8184343331504e-24	1.10574126132436e-22	Solyc01g097520_3	1	88219535	88222116	+	1599	protein_coding	NA && sp|Q9ZVJ6|ANXD4_ARATH Annexin D4 OS=Arabidopsis thaliana OX=3702 GN=ANN4 PE=1 SV=1 && PF00191:Annexin	MYB
Solyc03g119240_3	692.819588275194	682.097074920179	702.721572355192	250.234460573232	225.533992987742	216.669092936261	692.546078516855	230.812515499078	1.58576903859304	2.96886879025997e-24	1.16243088613839e-22	Solyc03g119240_3	3	69369061	69373821	+	3455	protein_coding	NA && sp|P0C5E2|LRL12_ARATH LEAF RUST 10 DISEASE-RESISTANCE LOCUS RECEPTOR-LIKE PROTEIN KINASE-like 1.2 OS=Arabidopsis thaliana OX=3702 GN=LRK10L-1.2 PE=2 SV=3 && PF13947:Wall-associated receptor kinase galacturonan-binding|PF00069:Protein kinase domain|PF14380:Wall-associated receptor kinase C-terminal	bHLH
Solyc10g012080_3	534.647569065197	547.086466287097	568.435260754849	113.952923584118	136.111743136462	68.8793721371446	550.056432035714	106.314679619241	2.37578269318057	3.11354970514852e-24	1.21664595963458e-22	Solyc10g012080_3	10	4396499	4399512	-	1400	protein_coding	NA && - && -	-
Solyc09g011740_3	771.251994495027	837.065773525108	938.700430604338	314.910444229083	292.798517212156	250.774413120672	849.006066208158	286.16112485397	1.57013668080634	3.21412380122587e-24	1.25344425610755e-22	Solyc09g011740_3	9	5033831	5038755	+	2429	protein_coding	NA && sp|Q9SH93|IPCS2_ARATH Phosphatidylinositol:ceramide inositolphosphotransferase 2 OS=Arabidopsis thaliana OX=3702 GN=IPCS2 PE=1 SV=1 && PF14360:PAP2 superfamily C-terminal	-
Solyc10g050890_2	545.105223227841	516.562328683096	599.725275108327	1273.50091627116	1221.84029885289	1238.49123493196	553.797609006421	1244.61081668533	-1.16898857307064	3.50340406628102e-24	1.36354157863983e-22	Solyc10g050890_2	10	51044816	51047527	-	2258	protein_coding	NA && sp|P38500|NIR_BETPN Ferredoxin--nitrite reductase, chloroplastic OS=Betula pendula OX=3505 GN=NIR1 PE=2 SV=1 && PF01077:Nitrite and sulphite reductase 4Fe-4S domain|PF03460:Nitrite/Sulfite reductase ferredoxin-like half domain	-
Solyc09g005830_1	684.976347653211	624.570815589562	528.01899221494	115.492827956876	164.60024751386	167.182942080448	612.522051819237	149.092005850395	2.03754309999155	3.88388541204974e-24	1.50862747443845e-22	Solyc09g005830_1	9	572687	574603	+	1917	protein_coding	NA && sp|Q8VY27|E70H1_ARATH Exocyst complex component EXO70H1 OS=Arabidopsis thaliana OX=3702 GN=EXO70H1 PE=1 SV=1 && PF03081:Exo70 exocyst complex subunit	WRKY
Solyc06g030470_3	1032.69334856114	1399.41430861421	1135.56677091164	479.680212114226	353.732262686037	375.827253796847	1189.22480936233	403.07990953237	1.56174252018626	3.98387506687753e-24	1.54440241949032e-22	Solyc06g030470_3	6	18831406	18833893	-	1972	protein_coding	NA && sp|Q8GYT8|SOK3_ARATH Protein SOSEKI 3 OS=Arabidopsis thaliana OX=3702 GN=SOK3 PE=1 SV=1 && PF06136:Domain of unknown function (DUF966)	C2H2
Solyc05g012850_2	7.84324062198333	18.7840846793853	6.5187529903079	188.638285662898	231.864771738275	290.89831921998	11.0486927638922	237.133792207051	-4.40342190676219	4.03372593663961e-24	1.56063740437932e-22	Solyc05g012850_2	5	5997827	5998956	-	1056	protein_coding	NA && - && -	-
Solyc02g081030_3	1100.66810061833	1209.22545123543	844.830387543904	303.361161433395	357.68899940512	377.833449101813	1051.57464646589	346.294536646776	1.60233890355667	4.63265573871302e-24	1.78882645753027e-22	Solyc02g081030_3	2	45639309	45651748	-	3147	protein_coding	NA && sp|Q5XEZ5|CSC1_ARATH Calcium permeable stress-gated cation channel 1 OS=Arabidopsis thaliana OX=3702 GN=CSC1 PE=1 SV=1 && PF02714:Calcium-dependent channel, 7TM region, putative phosphate|PF14703:Cytosolic domain of 10TM putative phosphate transporter|PF13967:Late exocytosis, associated with Golgi transport	BBR-BPC
Solyc02g030170_3	1078.44558552271	1122.34905959327	761.390349267963	2357.59359469303	2396.19975707678	2178.7281011924	987.394998127981	2310.84048432074	-1.22581454833614	5.07825827460093e-24	1.9531839340248e-22	Solyc02g030170_3	2	25733241	25735670	-	2102	protein_coding	NA && sp|P93472|DIM_PEA Delta(24)-sterol reductase OS=Pisum sativum OX=3888 GN=DIM PE=1 SV=1 && PF01565:FAD binding domain	-
Solyc04g051360_3	572.556565404783	616.352778542331	567.131510156787	0	0	0	585.346951367967	0	12.067779206203	5.38373461467924e-24	2.06257089142026e-22	Solyc04g051360_3	4	50365615	50367164	+	1173	protein_coding	NA && sp|Q9FGF8|ABR1_ARATH Ethylene-responsive transcription factor ABR1 OS=Arabidopsis thaliana OX=3702 GN=ABR1 PE=2 SV=1 && PF00847:AP2 domain	ERF
Solyc03g113470_2	173.858500453964	223.061005567701	125.160057413912	728.3747683147	656.026948023992	746.304653447121	174.026521145192	710.235456595271	-2.02601033758262	6.22061077564999e-24	2.37853314755664e-22	Solyc03g113470_2	3	65092163	65103913	+	4409	protein_coding	NA && sp|Q9SSG3|HIPL1_ARATH HIPL1 protein OS=Arabidopsis thaliana OX=3702 GN=HIPL1 PE=3 SV=2 && PF07995:Glucose / Sorbosone dehydrogenase	LBD
Solyc03g123460_3	258.82694052545	219.538989690316	130.375059806158	9.2394262365501	1.58269468763327	9.3622447565051	202.913663340641	6.72812189356282	4.89682827684276	6.59748998739731e-24	2.51772049675004e-22	Solyc03g123460_3	3	71807480	71808797	+	743	protein_coding	NA && sp|P0DO11|FLZ17_ARATH FCS-Like Zinc finger 17 OS=Arabidopsis thaliana OX=3702 GN=FLZ17 PE=1 SV=1 && PF04570:zinc-finger of the FCS-type, C2-C2	-
Solyc04g063350_3	249.676493133136	450.818032305248	375.480172241735	43.887274623613	10.2875154696163	22.7368801229409	358.658232560039	25.6372234053901	3.80667060727208	7.03888553136805e-24	2.68093895034226e-22	Solyc04g063350_3	4	55473351	55480565	+	1847	protein_coding	NA && sp|Q9LPL5|ODBA1_ARATH 2-oxoisovalerate dehydrogenase subunit alpha 1, mitochondrial OS=Arabidopsis thaliana OX=3702 GN=At1g21400 PE=2 SV=1 && PF00676:Dehydrogenase E1 component	E2F/DP
Solyc07g040990_3	652.296178394947	570.566572136329	701.41782175713	175.549098494452	140.859827199361	200.619530496538	641.426857429469	172.342818730117	1.89340051092209	7.11772505045215e-24	2.70570297694567e-22	Solyc07g040990_3	7	51606095	51609075	+	2157	protein_coding	NA && sp|Q0JLP9|P2C06_ORYSJ Probable protein phosphatase 2C 6 OS=Oryza sativa subsp. japonica OX=39947 GN=PP2C06 PE=1 SV=1 && PF00481:Protein phosphatase 2C	NAC
Solyc02g090400_3	674.518693490566	685.619090797564	513.677735636262	95.4740711110177	173.305068295844	112.346937078061	624.605173308131	127.042025494974	2.29977734096258	7.61982312033884e-24	2.89095498501693e-22	Solyc02g090400_3	2	52601857	52604266	+	1433	protein_coding	NA && sp|Q5VRW2|NOH1_ORYSJ Transcription factor NIGTH1 OS=Oryza sativa subsp. japonica OX=39947 GN=NHO1 PE=1 SV=2 && PF00249:Myb-like DNA-binding domain	G2-like
Solyc05g056420_3	484.973711792636	413.249862946477	353.316412074688	66.9858402149882	49.8548826604481	89.6100569551202	417.1799956046	68.8169266101855	2.59485146368968	8.01091640037545e-24	3.0334566802737e-22	Solyc05g056420_3	5	66564382	66575987	-	8095	protein_coding	NA && sp|Q9FFN7|DGK2_ARATH Diacylglycerol kinase 2 OS=Arabidopsis thaliana OX=3702 GN=DGK2 PE=1 SV=1 && PF14144:Seed dormancy control	bHLH
Solyc11g063500_1	1241.84643181403	1024.90662031896	1408.05064590651	425.013606881305	392.508282533052	504.223753314632	1224.93456601316	440.581880909663	1.47349775533942	9.26689862625128e-24	3.5022794286896e-22	Solyc11g063500_1	11	49914528	49914698	+	171	protein_coding	NA && - && -	-
Solyc12g007050_1	461.443989926686	396.813788852015	593.206522118019	110.103162652222	104.457849383796	103.653424089878	483.82143363224	106.071478708632	2.1889671149729	9.92254911362516e-24	3.73564892302769e-22	Solyc12g007050_1	12	1490127	1490701	-	198	protein_coding	NA && - && -	-
Solyc01g079610_3	537.261982605858	299.371349577703	466.742714106046	79.305075197055	40.3587145346485	42.7988331725947	434.458682096536	54.1542076347661	3.00535269258039	1.10073337552452e-23	4.13609544964366e-22	Solyc01g079610_3	1	78573033	78579326	-	1896	protein_coding	NA && sp|Q9LZK5|DNJ19_ARATH DnaJ protein ERDJ3B OS=Arabidopsis thaliana OX=3702 GN=ERDJ3B PE=1 SV=1 && PF00226:DnaJ domain|PF01556:DnaJ C terminal domain	MYB
Solyc09g010980_1	564.7133247828	487.212196371557	460.223961115738	122.422397634289	130.572311729745	139.096207810933	504.049827423365	130.696972391656	1.94631820717512	1.20138065956547e-23	4.50563777247378e-22	Solyc09g010980_1	9	4333413	4333640	+	228	protein_coding	NA && - && -	-
Solyc07g053480_3	788.245682509324	669.183016703102	921.751672829537	199.417616272206	250.065760646057	148.458452567438	793.060124013988	199.313943161901	1.99449392035146	1.63523955543621e-23	6.10936732381195e-22	Solyc07g053480_3	7	62054552	62057418	+	1261	protein_coding	NA && sp|Q9FJH0|RAA1F_ARATH Ras-related protein RABA1f OS=Arabidopsis thaliana OX=3702 GN=RABA1F PE=2 SV=1 && PF00071:Ras family	WOX
Solyc02g089250_3	150.328778588014	143.228645680313	65.187529903079	1308.9187168446	1225.79703557197	1442.45442427011	119.581651390469	1325.72339222889	-3.4696717524827	1.73499118039756e-23	6.46969949307485e-22	Solyc02g089250_3	2	51753568	51756198	+	2068	protein_coding	NA && - && PF01190:Pollen proteins Ole e I like	Nin-like
Solyc03g111710_3	870.599709040149	784.235535364337	754.871596277655	267.943360859953	223.159950956292	156.483233787299	803.235613560714	215.862181867848	1.89801322109089	1.85415234175628e-23	6.90090121569632e-22	Solyc03g111710_3	3	63855417	63858784	+	2075	protein_coding	NA && sp|Q9FMK7|BT1_ARATH BTB/POZ and TAZ domain-containing protein 1 OS=Arabidopsis thaliana OX=3702 GN=BT1 PE=1 SV=1 && PF00651:BTB/POZ domain|PF02135:TAZ zinc finger	C2H2
Solyc09g056450_3	1994.79753152443	1899.54056320284	1535.81820451654	855.416879067263	667.897158181242	791.778413693002	1810.05209974794	771.697483647169	1.22976377965679	1.88106033446186e-23	6.98776435820869e-22	Solyc09g056450_3	9	49451765	49455316	-	2321	protein_coding	NA && sp|Q9SRT0|PUB9_ARATH U-box domain-containing protein 9 OS=Arabidopsis thaliana OX=3702 GN=PUB9 PE=1 SV=1 && PF04564:U-box domain	bHLH
Solyc04g011460_2	874.521329351141	810.063651798492	760.086598669901	203.267377204102	227.908035019191	303.604222818094	814.890526606511	244.926545013796	1.73197068586621	2.09504413453061e-23	7.76793163289882e-22	Solyc04g011460_2	4	3900395	3902548	-	1617	protein_coding	NA && - && -	WOX
Solyc01g103220_3	1457.53554891857	1465.15860499205	1331.12936062087	579.00404415714	485.887269103415	675.419086005011	1417.9411715105	580.103466421855	1.28817086184386	2.10917395365102e-23	7.79357648599423e-22	Solyc01g103220_3	1	91741144	91746360	+	1496	protein_coding	NA && sp|P00061|CYC_SOLTU Cytochrome c OS=Solanum tuberosum OX=4113 PE=1 SV=1 && PF00034:Cytochrome c	-
Solyc01g111400_3	86.2756468418166	122.096550416005	92.5662924623722	440.412650608888	447.902596600217	595.840005574717	100.312829906731	494.718417594607	-2.29962374896846	2.10992263246511e-23	7.79357648599423e-22	Solyc01g111400_3	1	97574237	97576555	+	2319	protein_coding	NA && sp|O49607|SBT16_ARATH Subtilisin-like protease SBT1.6 OS=Arabidopsis thaliana OX=3702 GN=SBT1.6 PE=2 SV=1 && PF00082:Subtilase family|PF02225:PA domain|PF17766:Fibronectin type-III domain|PF05922:Peptidase inhibitor I9	bHLH
Solyc07g040710_3	1171.25726621618	1195.13738772589	1374.15313035691	500.468921146464	586.388381768128	504.892485082953	1246.84926143299	530.583262665848	1.23302935136044	2.25444434274793e-23	8.31172446289572e-22	Solyc07g040710_3	7	49539060	49541243	+	1590	protein_coding	NA && sp|O64851|IQM4_ARATH IQ domain-containing protein IQM4 OS=Arabidopsis thaliana OX=3702 GN=IQM4 PE=2 SV=1 && -	FAR1
Solyc08g065670_3	33.9873760285944	63.3962857929254	82.1362876778795	361.877527598212	470.851669570899	429.325795262591	59.8399831664665	420.684997477234	-2.81244221008319	2.50458601998017e-23	9.21659408141953e-22	Solyc08g065670_3	8	53962124	53964466	+	1799	protein_coding	NA && sp|Q9XGZ9|P2C72_ARATH Probable protein phosphatase 2C 72 OS=Arabidopsis thaliana OX=3702 GN=At5g26010 PE=2 SV=2 && PF00481:Protein phosphatase 2C	B3
Solyc12g009880_1	20.9153083252889	30.5241376040011	9.12625418643106	260.243838996161	326.826452996271	229.374996534375	20.1885667052404	272.148429508936	-3.74023241988385	2.66483830978075e-23	9.78790611455491e-22	Solyc12g009880_1	12	3055601	3056095	-	495	protein_coding	NA && - && -	bHLH
Solyc05g055760_3	535.954775835527	368.637661832937	470.65396590023	107.793306093084	99.7097653208963	98.9723017116253	458.415467856231	102.158457708535	2.16534571112288	5.41361103545794e-23	1.98468657754981e-21	Solyc05g055760_3	5	66118006	66121236	-	1062	protein_coding	NA && sp|O48965|IDI2_CAMAC Isopentenyl-diphosphate Delta-isomerase II OS=Camptotheca acuminata OX=16922 GN=IPI2 PE=2 SV=1 && PF00293:NUDIX domain	-
Solyc01g109710_3	1070.60234490072	1171.65728187666	1204.6655526089	447.342220286301	348.984178623137	494.861508558127	1148.97505979543	430.395969155855	1.41527198797539	5.8954841633834e-23	2.15730641993564e-21	Solyc01g109710_3	1	96514932	96517857	-	1132	protein_coding	NA && - && PF00582:Universal stress protein family	-
Solyc03g082720_3	235.2972186595	136.184613925544	216.422599278222	744.543764228662	796.095427879537	700.830893201239	195.968143954422	747.156695103146	-1.93387656128411	5.93276063723656e-23	2.16689654841754e-21	Solyc03g082720_3	3	54056787	54059828	+	929	protein_coding	NA && sp|Q2V3E2|YIPL5_ARATH Protein yippee-like At4g27740 OS=Arabidopsis thaliana OX=3702 GN=At4g27740 PE=3 SV=1 && PF03226:Yippee zinc-binding/DNA-binding /Mis18, centromere assembly	WRKY
Solyc04g007790_3	227.453978037517	291.153312530472	194.258839111175	907.003675554668	712.212609434973	816.521489120909	237.622043226388	811.912591370183	-1.77039950344364	6.7587096445756e-23	2.46397129817237e-21	Solyc04g007790_3	4	1474888	1476848	+	816	protein_coding	NA && sp|Q9SSK5|MLP43_ARATH MLP-like protein 43 OS=Arabidopsis thaliana OX=3702 GN=MLP43 PE=1 SV=1 && PF00407:Pathogenesis-related protein Bet v I family	-
Solyc09g065540_3	1030.07893502048	807.715641213569	690.987816972637	285.652261146674	212.872435486675	236.062314217593	842.927464402228	244.862336950314	1.78335632533261	9.8899321551881e-23	3.58546670003921e-21	Solyc09g065540_3	9	63893174	63910612	+	5623	protein_coding	NA && sp|Q42777|MCCA_SOYBN Methylcrotonoyl-CoA carboxylase subunit alpha, mitochondrial OS=Glycine max OX=3847 GN=MCCA PE=1 SV=2 && PF00289:Biotin carboxylase, N-terminal domain|PF00364:Biotin-requiring enzyme|PF02786:Carbamoyl-phosphate synthase L chain, ATP binding domain|PF02785:Biotin carboxylase C-terminal domain	B3
Solyc08g074970_1	146.407158277022	167.882756822006	239.890110043331	12.3192349820668	11.0788628134329	12.0371718297923	184.726675047453	11.811756541764	3.96586393166897	1.00536030813397e-22	3.63806631281675e-21	Solyc08g074970_1	8	59224125	59225570	-	1446	protein_coding	NA && - && PF00534:Glycosyl transferases group 1|PF13439:Glycosyltransferase Family 4	-
Solyc09g090130_3	1099.360893848	1097.69494845158	1075.5942434008	498.929016773705	371.141904250003	368.471204345308	1090.88336190013	412.847375123005	1.40252229646197	1.14407183123331e-22	4.13237901108019e-21	Solyc09g090130_3	9	70150859	70153182	+	1346	protein_coding	NA && sp|Q9LTC4|MYB15_ARATH Transcription factor MYB15 OS=Arabidopsis thaliana OX=3702 GN=MYB15 PE=1 SV=1 && PF00249:Myb-like DNA-binding domain	MYB
Solyc05g005190_3	1122.89061571395	1089.47691140435	1072.98674220468	505.088634264739	374.307293625269	409.263842212937	1095.11808977432	429.553256700982	1.35032090920867	1.16486192601046e-22	4.19972411151137e-21	Solyc05g005190_3	5	169443	172750	+	856	protein_coding	NA && sp|P51823|ARF2_ORYSJ ADP-ribosylation factor 2 OS=Oryza sativa subsp. japonica OX=39947 GN=ARF PE=2 SV=2 && PF00025:ADP-ribosylation factor family	GATA
Solyc02g078890_1	287.585489472722	235.975063784778	215.118848680161	10.7793306093084	26.114462345949	27.4180025011935	246.226467312554	21.4372651521503	3.51662039650614	1.43657021706425e-22	5.16980425357846e-21	Solyc02g078890_1	2	44083892	44084086	+	195	protein_coding	NA && - && -	-
Solyc08g007140_3	1409.16889841634	1192.78937714097	1203.36180201084	600.562705375756	505.670952698831	478.811946118404	1268.44002585605	528.348534730997	1.26387541402273	1.49540683036289e-22	5.36918502535611e-21	Solyc08g007140_3	8	1705476	1708247	+	741	protein_coding	NA && sp|Q9XHE4|RL37A_GOSHI 60S ribosomal protein L37a OS=Gossypium hirsutum OX=3635 GN=RPL37A PE=3 SV=1 && -	B3
Solyc04g054710_3	899.358257987422	1068.34481614004	718.366579531931	298.74144831512	295.172559243606	293.573246293267	895.356551219797	295.829084617331	1.59847776188808	1.49745876479769e-22	5.36918502535611e-21	Solyc04g054710_3	4	53026038	53032574	+	1865	protein_coding	NA && sp|E9L7A5|PAT_PETHY Bifunctional aspartate aminotransferase and glutamate/aspartate-prephenate aminotransferase OS=Petunia hybrida OX=4102 GN=PPA-AT PE=1 SV=1 && PF00155:Aminotransferase class I and II	M-type_MADS
Solyc03g119640_3	36.6017895692555	37.5681693587706	26.0750119612316	314.910444229083	279.345612367273	236.731045985915	33.4149902964193	276.995700860757	-3.04817643106888	1.56755864031209e-22	5.61025511908404e-21	Solyc03g119640_3	3	69680470	69684905	+	2561	protein_coding	NA && sp|Q9LS46|ALMT9_ARATH Aluminum-activated malate transporter 9 OS=Arabidopsis thaliana OX=3702 GN=ALMT9 PE=2 SV=1 && PF11744:Aluminium activated malate transporter	-
Solyc02g086930_3	586.935839878419	557.652513919252	466.742714106046	1175.716988601	1253.49419260555	1327.43256011876	537.110355967905	1252.21458044177	-1.22107139657851	1.80050413088805e-22	6.39718137393746e-21	Solyc02g086930_3	2	50156652	50161185	+	2406	protein_coding	NA && sp|Q02283|HAT5_ARATH Homeobox-leucine zipper protein HAT5 OS=Arabidopsis thaliana OX=3702 GN=HAT5 PE=1 SV=1 && PF00046:Homeodomain|PF02183:Homeobox associated leucine zipper	HD-ZIP
Solyc02g086270_3	854.913227796183	941.552244554189	899.58791266249	280.26259584202	374.307293625269	331.022225319287	898.684461670954	328.530704928859	1.45219860328808	1.85785067255488e-22	6.58897511170414e-21	Solyc02g086270_3	2	49616968	49620515	-	2720	protein_coding	NA && sp|F4HQ17|LRL14_ARATH LEAF RUST 10 DISEASE-RESISTANCE LOCUS RECEPTOR-LIKE PROTEIN KINASE-like 1.4 OS=Arabidopsis thaliana OX=3702 GN=LRK10L-1.4 PE=2 SV=2 && PF14380:Wall-associated receptor kinase C-terminal|PF13947:Wall-associated receptor kinase galacturonan-binding|PF00069:Protein kinase domain	bHLH
Solyc02g087330_3	583.014219567427	486.038191079095	518.892738028509	83.1548361289509	147.981953293711	117.028059456314	529.315049558344	116.054949626325	2.18955958180794	2.27299145316736e-22	8.03219380481181e-21	Solyc02g087330_3	2	50402604	50404497	-	567	protein_coding	NA && - && -	-
Solyc02g078900_3	495.43136595528	584.654635645868	593.206522118019	176.319050680831	155.895426731877	160.49562439723	557.764174573056	164.236700603313	1.76428124643785	2.54186937302109e-22	8.93396350370447e-21	Solyc02g078900_3	2	44085754	44090997	-	3442	protein_coding	NA && sp|O80874|NDA2_ARATH Internal alternative NAD(P)H-ubiquinone oxidoreductase A2, mitochondrial OS=Arabidopsis thaliana OX=3702 GN=NDA2 PE=1 SV=1 && PF07992:Pyridine nucleotide-disulphide oxidoreductase	-
Solyc03g025720_3	1007.85641992486	1019.03659385665	1280.28308729647	370.347001648383	408.335229409385	468.112237825255	1102.39203369266	415.598156294341	1.40610277003864	2.8324237989099e-22	9.93734062925792e-21	Solyc03g025720_3	3	3160346	3166495	+	4280	protein_coding	NA && sp|M4IQQ7|CCL9_HUMLU Probable CoA ligase CCL9 OS=Humulus lupulus OX=3486 GN=CCL9 PE=2 SV=1 && PF13193:AMP-binding enzyme C-terminal domain|PF00501:AMP-binding enzyme	NAC
Solyc07g062080_3	735.957411696102	885.199990516033	972.597946153939	307.210922365291	304.668727369405	233.387387144306	864.585116122025	281.755678959667	1.61925743315474	2.97736972979135e-22	1.04271855456396e-20	Solyc07g062080_3	7	65036414	65042208	+	2777	protein_coding	NA && sp|Q9LUC3|MPK19_ARATH Mitogen-activated protein kinase 19 OS=Arabidopsis thaliana OX=3702 GN=MPK19 PE=1 SV=2 && PF00069:Protein kinase domain	HB-other
Solyc03g111690_3	60.1315114352055	35.2201587738475	93.8700430604338	480.450164300605	368.767862218553	492.186581484839	63.0739044231622	447.134869334666	-2.83215365428163	2.9874581912399e-22	1.04438337517685e-20	Solyc03g111690_3	3	63827404	63832904	+	1974	protein_coding	NA && sp|Q93Z25|PLY22_ARATH Probable pectate lyase 22 OS=Arabidopsis thaliana OX=3702 GN=At5g63180 PE=2 SV=1 && PF00544:Pectate lyase	AP2
Solyc01g007030_3	2011.79121953872	2016.941092449	2039.06593536831	147.830819784802	240.569592520258	94.9599111016945	2022.59941578534	161.120107802251	3.65149632491484	3.21243925587925e-22	1.12103250111138e-20	Solyc01g007030_3	1	1582086	1582763	-	678	protein_coding	NA && sp|Q9SVC6|PUB22_ARATH E3 ubiquitin-protein ligase PUB22 OS=Arabidopsis thaliana OX=3702 GN=PUB22 PE=1 SV=1 && -	Dof
Solyc02g089630_3	1122.89061571395	1011.99256210188	1069.0754904105	28.4882308960295	64.8904821929642	18.7244895130102	1067.98622274211	37.367734200668	4.84146882208388	3.48479617047069e-22	1.21391200408015e-20	Solyc02g089630_3	2	52017396	52019762	-	1617	protein_coding	NA && sp|Q6NKX1|PROD2_ARATH Proline dehydrogenase 2, mitochondrial OS=Arabidopsis thaliana OX=3702 GN=POX2 PE=2 SV=1 && PF01619:Proline dehydrogenase	-
Solyc08g078040_3	490.202538873958	444.94800584294	453.70520812543	95.4740711110177	109.205933446696	134.41508543268	462.951917614109	113.031696663465	2.03142847550483	4.47989880336676e-22	1.55501735591332e-20	Solyc08g078040_3	8	62029663	62034745	+	3366	protein_coding	NA && sp|O81816|MO2_ARATH Monooxygenase 2 OS=Arabidopsis thaliana OX=3702 GN=MO2 PE=2 SV=1 && -	-
Solyc08g075360_2	244.447666051814	224.235010860162	220.333851072407	13.8591393548251	22.1577256268658	30.7616613428025	229.672175994794	22.2595087748311	3.35859678635431	4.570919615495e-22	1.58380342146098e-20	Solyc08g075360_2	8	59620899	59626483	-	2237	protein_coding	NA && sp|Q8LPJ4|AB2E_ARATH ABC transporter E family member 2 OS=Arabidopsis thaliana OX=3702 GN=ABCE2 PE=2 SV=1 && PF00005:ABC transporter|PF04068:Possible Fer4-like domain in RNase L inhibitor, RLI|PF00037:4Fe-4S binding domain	GeBP
Solyc04g071770_3	674.518693490566	808.88964650603	631.015289461805	230.985655913752	163.808900170044	133.077621896037	704.807876486134	175.957392659944	2.00443319877821	4.61944503251077e-22	1.59778931804705e-20	Solyc04g071770_3	4	58831266	58833018	+	1457	protein_coding	NA && sp|Q70II3|EF110_ARATH Ethylene-responsive transcription factor ERF110 OS=Arabidopsis thaliana OX=3702 GN=ERF110 PE=2 SV=2 && PF00847:AP2 domain	ERF
Solyc09g074250_3	213.07470356388	292.327317822934	342.886407290196	10.7793306093084	34.819283127932	9.3622447565051	282.762809559003	18.3202861645819	3.96130081778099	5.61179852086731e-22	1.93760457924196e-20	Solyc09g074250_3	9	66451550	66456133	+	2089	protein_coding	NA && sp|Q8RXC8|RBK2_ARATH Receptor-like cytosolic serine/threonine-protein kinase RBK2 OS=Arabidopsis thaliana OX=3702 GN=RBK2 PE=1 SV=1 && PF07714:Protein tyrosine kinase	bZIP
Solyc01g079590_3	449.679128993711	345.157555983705	311.596392936718	995.548176988273	988.39283242698	1043.221558582	368.811025971378	1009.05418933242	-1.45284422937981	5.75778474865039e-22	1.98450971873818e-20	Solyc01g079590_3	1	78554807	78562374	+	1064	protein_coding	NA && sp|Q5REM8|TM205_PONAB Transmembrane protein 205 OS=Pongo abelii OX=9601 GN=TMEM205 PE=2 SV=1 && PF13664:Domain of unknown function (DUF4149)	MYB
Solyc06g053630_3	1104.58972092932	1168.13526599927	1050.82298203763	486.609781791639	529.41137301333	472.124628435186	1107.84932298874	496.048594413385	1.16008551085975	6.27166615615821e-22	2.15782791457134e-20	Solyc06g053630_3	6	36555633	36561997	-	2055	protein_coding	NA && sp|P48489|PP1_ORYSJ Serine/threonine-protein phosphatase PP1 OS=Oryza sativa subsp. japonica OX=39947 GN=Os03g0268000 PE=2 SV=2 && PF16891:Serine-threonine protein phosphatase N-terminal domain|PF00149:Calcineurin-like phosphoesterase	FAR1
Solyc11g045130_2	1411.783311957	1526.20688020006	1248.99307294299	670.628354336261	580.848950361412	504.223753314632	1395.66108836668	585.233686004102	1.25513104856716	6.49215387890699e-22	2.22977011381337e-20	Solyc11g045130_2	11	31933065	31936650	-	1338	protein_coding	NA && sp|Q9SKZ2|CAF1G_ARATH Probable CCR4-associated factor 1 homolog 7 OS=Arabidopsis thaliana OX=3702 GN=CAF1-7 PE=2 SV=2 && PF04857:CAF1 family ribonuclease	-
Solyc03g114860_3	507.196226888255	326.37347130432	367.657668653366	58.5163661648173	80.717429069297	39.4551743309858	400.40912228198	59.5629898550333	2.7537800663504	7.39024788822194e-22	2.53378078647497e-20	Solyc03g114860_3	3	66233972	66235616	-	1376	protein_coding	NA && sp|Q8RU27|RGP2_SOLTU Probable UDP-arabinopyranose mutase 2 OS=Solanum tuberosum OX=4113 GN=UPTG2 PE=1 SV=1 && PF03214:Reversibly glycosylated polypeptide	-
Solyc12g099330_2	817.004231456597	899.288054025572	795.287864817564	317.990252974599	329.200495027721	254.118071962281	837.193383433244	300.436273321534	1.4804548498987	7.77934209716046e-22	2.66252063349843e-20	Solyc12g099330_2	12	67501268	67503363	-	691	protein_coding	NA && sp|Q84WM0|RL292_ARATH 60S ribosomal protein L29-2 OS=Arabidopsis thaliana OX=3702 GN=RPL29B PE=3 SV=2 && -	CAMTA
Solyc06g073310_3	1726.82014360666	2080.33737824192	2113.37971945782	990.158511683619	974.14858023828	781.747437168176	1973.5124137688	915.351509696692	1.10943699820699	7.8480162381864e-22	2.68133706622993e-20	Solyc06g073310_3	6	45304042	45306269	-	1288	protein_coding	NA && sp|P49209|RL91_ARATH 60S ribosomal protein L9-1 OS=Arabidopsis thaliana OX=3702 GN=RPL9B PE=1 SV=3 && PF00347:Ribosomal protein L6	-
Solyc02g085730_3	724.192550763127	734.92731308095	512.373985038201	80.8449795698134	177.261805014927	121.040450066244	657.164616294093	126.382411550328	2.37977360260168	8.02839983136314e-22	2.7381878658292e-20	Solyc02g085730_3	2	49169184	49170468	+	1116	protein_coding	NA && sp|A2XID3|AOC_ORYSI Allene oxide cyclase, chloroplastic OS=Oryza sativa subsp. indica OX=39946 GN=AOC PE=2 SV=1 && PF06351:Allene oxide cyclase	-
Solyc08g062690_2	934.652840786347	1036.64667324358	1162.94553347093	397.295328171654	422.579481598084	458.081261300428	1044.74834916695	425.985357023389	1.29359443669035	9.19392030381004e-22	3.13025004848155e-20	Solyc08g062690_2	8	51841885	51843023	+	938	protein_coding	NA && - && PF13359:DDE superfamily endonuclease	SBP
Solyc12g100250_2	105.883748396775	109.182492198927	99.0850454526801	518.177821433185	370.350556906186	516.260925144424	104.717095349461	468.263101161265	-2.16069927845949	1.01942953619186e-21	3.46482153299097e-20	Solyc12g100250_2	12	68007697	68014918	-	1239	protein_coding	NA && sp|Q8GZC3|FAD2_VERFO Delta(12)-fatty-acid desaturase FAD2 OS=Vernicia fordii OX=73154 GN=FAD2 PE=1 SV=1 && PF11960:Domain of unknown function (DUF3474)|PF00487:Fatty acid desaturase	HSF
Solyc07g061950_3	963.411389733619	792.453572411568	956.9529389772	338.778962006837	318.912979558105	373.821058491882	904.272633707462	343.837666685608	1.39351651611583	1.07751968934152e-21	3.65591039137591e-20	Solyc07g061950_3	7	64946787	64954448	-	2890	protein_coding	NA && sp|Q93XX4|C2D61_ARATH C2 domain-containing protein At1g53590 OS=Arabidopsis thaliana OX=3702 GN=NTMC2T6.1 PE=1 SV=2 && PF00168:C2 domain	EIL
Solyc08g007820_1	1372.56710884708	1353.6281022082	1655.76325953821	0	6.3307787505331	8.02478121986151	1460.65282353116	4.7851866567982	8.24360694831934	1.24288803151224e-21	4.20571243043596e-20	Solyc08g007820_1	8	2326932	2327666	-	735	protein_coding	NA && sp|Q9FJ93|DRE1D_ARATH Dehydration-responsive element-binding protein 1D OS=Arabidopsis thaliana OX=3702 GN=DREB1D PE=2 SV=1 && PF00847:AP2 domain	ERF
Solyc01g087850_2	1015.69966054684	1021.38460444158	821.362876778795	342.628722938733	288.050433149256	387.195693858318	952.815713922404	339.291616648769	1.48855227724348	1.24386141759331e-21	4.20571243043596e-20	Solyc01g087850_2	1	82594921	82598028	+	3108	protein_coding	NA && sp|O82777|SBT3_SOLLC Subtilisin-like protease SBT3 OS=Solanum lycopersicum OX=4081 GN=sbt3 PE=1 SV=1 && PF17766:Fibronectin type-III domain|PF05922:Peptidase inhibitor I9|PF00082:Subtilase family	bHLH
Solyc12g099500_2	90.1972671528083	137.358619218005	126.463808011973	572.844426666106	429.701607692434	551.034977097157	118.006564794262	517.860337151899	-2.13176767876589	1.53624580037618e-21	5.18535931620079e-20	Solyc12g099500_2	12	67607763	67608122	-	360	protein_coding	NA && - && -	-
Solyc03g121860_1	1030.07893502048	992.034472130037	1065.16423861631	451.191981218197	478.765143009065	463.431115447002	1029.09254858894	464.462746558088	1.14760939502225	1.63455565640605e-21	5.50769295791073e-20	Solyc03g121860_1	3	71387525	71388097	-	573	protein_coding	NA && sp|Q9LNQ1|TI231_ARATH Mitochondrial import inner membrane translocase subunit TIM23-1 OS=Arabidopsis thaliana OX=3702 GN=TIM23-1 PE=2 SV=1 && PF02466:Tim17/Tim22/Tim23/Pmp24 family	-
novel.229	346.409794137597	298.197344285242	267.268872602624	27.7182787096503	46.6894932851816	53.4985414657434	303.958670341821	42.6354378201918	2.8297941746598	1.65843168649297e-21	5.57854246159326e-20	-	10	20911570	20916248	-	2973	-	- && - && -	bHLH
Solyc03g093800_1	1358.18783437345	1495.68274259606	1444.55566265223	146.290915412043	70.4299135996807	54.836005002387	1432.80874654058	90.5189446713703	3.98593952285197	1.96834028327471e-21	6.60963940405985e-20	Solyc03g093800_1	3	56913720	56914145	-	426	protein_coding	NA && - && -	-
Solyc06g068090_3	1878.45612896501	1844.36231445715	1602.30948501768	849.25726157623	701.13374662154	919.506181442465	1775.04264281328	823.299063213412	1.10761446646014	2.16710747485926e-21	7.26463408139036e-20	Solyc06g068090_3	6	42313847	42318953	+	3593	protein_coding	NA && sp|P93400|PLDA1_TOBAC Phospholipase D alpha 1 OS=Nicotiana tabacum OX=4097 GN=PLD1 PE=2 SV=2 && PF00614:Phospholipase D Active site motif|PF12357:Phospholipase D C terminal|PF00168:C2 domain	TALE
Solyc09g007870_3	475.823264400322	577.610603891098	471.957716498292	1179.5667495329	1206.80469932037	1114.77585779243	508.463861596571	1167.04910221523	-1.19707383622433	2.55868332355356e-21	8.56262280772785e-20	Solyc09g007870_3	9	1399607	1407814	+	4888	protein_coding	NA && sp|Q9S814|EIN2_ARATH Ethylene-insensitive protein 2 OS=Arabidopsis thaliana OX=3702 GN=EIN2 PE=1 SV=1 && PF01566:Natural resistance-associated macrophage protein	-
Solyc03g031920_3	70.58916559785	54.0042434532328	59.9725275108327	402.684993476308	275.38887564819	428.657063494269	61.5219788539718	368.910310872922	-2.5867952597205	2.58070429943743e-21	8.62157816895676e-20	Solyc03g031920_3	3	4403126	4410101	-	2863	protein_coding	NA && sp|Q9SHY2|YSL7_ARATH Probable metal-nicotianamine transporter YSL7 OS=Arabidopsis thaliana OX=3702 GN=YSL7 PE=2 SV=1 && PF03169:OPT oligopeptide transporter protein	TCP
Solyc08g075420_3	298.043143635366	194.884878548623	265.965122004562	845.407500644334	798.469469910987	742.29226283719	252.964381396184	795.38974446417	-1.65494854202955	2.73911027851593e-21	9.13518942461779e-20	Solyc08g075420_3	8	59667658	59677051	-	2811	protein_coding	NA && sp|Q8VZ67|Y4919_ARATH Uncharacterized zinc finger CCHC domain-containing protein At4g19190 OS=Arabidopsis thaliana OX=3702 GN=At4g19190 PE=2 SV=1 && PF03947:Ribosomal Proteins L2, C-terminal domain|PF10197:N-terminal domain of CBF1 interacting co-repressor CIR	M-type_MADS
novel.853	107.190955167105	154.968698604929	225.548853464653	3.84976093189587	0	5.34985414657434	162.569502412229	3.06653835949007	5.68857764580321	2.76331330653228e-21	9.20023547652762e-20	-	5	14386426	14388892	-	1367	-	- && - && -	LBD
Solyc02g071970_1	86.2756468418166	79.8323598873876	78.2250358836948	456.581646522851	337.905315809704	379.839644406778	81.444347537633	391.442202246444	-2.26525310242926	2.93724844966326e-21	9.76273563651235e-20	Solyc02g071970_1	2	41870862	41871458	+	597	protein_coding	NA && - && -	-
Solyc03g031830_2	87.5828536121472	122.096550416005	108.211299639111	505.858586451118	404.378492690302	455.406334227141	105.963567889088	455.214471122853	-2.10077438354359	3.07071545248516e-21	1.01890502395427e-19	Solyc03g031830_2	3	4332626	4339330	+	1464	protein_coding	NA && sp|Q9M9P0|EXP13_ARATH Expansin-A13 OS=Arabidopsis thaliana OX=3702 GN=EXPA13 PE=2 SV=2 && PF13920:Zinc finger, C3HC4 type (RING finger)|PF03330:Lytic transglycolase|PF01357:Pollen allergen	MYB_related
Solyc06g074820_3	369.939516003547	338.113524228936	499.336479057585	1297.36943404891	1075.44104024681	1035.86550913046	402.463173096689	1136.22532780873	-1.49839555618613	3.55507084367516e-21	1.17762473615277e-19	Solyc06g074820_3	6	46499125	46501420	+	1034	protein_coding	NA && sp|O64964|TIP11_MAIZE Aquaporin TIP1-1 OS=Zea mays OX=4577 GN=TIP1-1 PE=2 SV=1 && PF00230:Major intrinsic protein	BES1
Solyc02g067440_3	103.269334856114	54.0042434532328	118.641304423604	465.821072759401	529.41137301333	468.112237825255	91.9716275776501	487.781561199329	-2.41221094674032	4.0155812756705e-21	1.32792288232772e-19	Solyc02g067440_3	2	38193260	38197843	-	2091	protein_coding	NA && sp|Q8LGJ5|PCO2_ARATH Plant cysteine oxidase 2 OS=Arabidopsis thaliana OX=3702 GN=PCO2 PE=1 SV=1 && PF07847:PCO_ADO	WRKY
Solyc01g105370_3	470.594437319	501.300259881096	624.496536471497	114.722875770497	163.017552826227	112.346937078061	532.130411223864	130.029121891595	2.0347628067882	4.58689711110115e-21	1.51429485234447e-19	Solyc01g105370_3	1	93452160	93468164	-	1967	protein_coding	NA && sp|A0A067XGX8|AROG2_PETHY Phospho-2-dehydro-3-deoxyheptonate aldolase 2, chloroplastic OS=Petunia hybrida OX=4102 GN=DAHP2 PE=2 SV=1 && PF01474:Class-II DAHP synthetase family|PF00005:ABC transporter|PF03060:Nitronate monooxygenase	MYB
Solyc10g085010_2	883.671776743455	645.70291085387	894.372910270244	286.422213333053	221.577256268658	263.480316718786	807.915865955856	257.159928773499	1.65036227595935	5.00840571920552e-21	1.65066597247284e-19	Solyc10g085010_2	10	64475155	64476227	-	756	protein_coding	NA && - && PF06521:PAR1 protein	-
Solyc11g012110_2	1512.43823327245	1285.53579524543	1415.87314949488	690.64711118212	709.047220059707	696.149770822986	1404.61572600425	698.614700688271	1.00719138785218	6.7479292262668e-21	2.21651359836619e-19	Solyc11g012110_2	11	5037581	5039733	+	1425	protein_coding	NA && sp|P34091|RL6_MESCR 60S ribosomal protein L6 OS=Mesembryanthemum crystallinum OX=3544 GN=RPL6 PE=2 SV=1 && PF01159:Ribosomal protein L6e|PF03868:Ribosomal protein L6, N-terminal domain	MYB_related
Solyc08g083120_3	1168.64285267552	1034.29866265865	951.737936584953	429.63331999958	380.638072375802	472.124628435186	1051.55981730637	427.465340270189	1.29753110334602	7.117225236889e-21	2.33390148178519e-19	Solyc08g083120_3	8	65795903	65798974	+	2336	protein_coding	NA && sp|P51423|RL40_BRARP Ubiquitin-60S ribosomal protein L40 OS=Brassica rapa subsp. pekinensis OX=51351 PE=2 SV=2 && PF02183:Homeobox associated leucine zipper|PF00046:Homeodomain	HD-ZIP
Solyc05g013680_3	95.4260942341305	65.7442963778486	78.2250358836948	355.717910107179	380.638072375802	402.576524529719	79.798475498558	379.644169004233	-2.25338449574425	8.28004039546045e-21	2.70614942941451e-19	Solyc05g013680_3	5	6982741	6988957	-	2521	protein_coding	NA && sp|Q9LIN2|GDL53_ARATH GDSL esterase/lipase At3g26430 OS=Arabidopsis thaliana OX=3702 GN=At3g26430 PE=1 SV=1 && PF00657:GDSL-like Lipase/Acylhydrolase	ERF
Solyc03g123580_3	24.8369286362805	19.9580899718469	13.0375059806158	263.323647741678	212.081088142859	189.919822203389	19.2775081962477	221.774852695975	-3.52299892673663	8.91833835813374e-21	2.9099051672864e-19	Solyc03g123580_3	3	71885785	71899203	-	13262	protein_coding	NA && sp|Q9LUM0|FAB1B_ARATH 1-phosphatidylinositol-3-phosphate 5-kinase FAB1B OS=Arabidopsis thaliana OX=3702 GN=FAB1B PE=2 SV=1 && -	bHLH
Solyc10g055200_1	1388.25359009105	1208.05144594297	1516.26194554562	81.6149317561925	29.2798517212156	91.6162522600856	1370.85566052654	67.5036785791646	4.34178908090932	9.22122028439211e-21	3.00372428465132e-19	Solyc10g055200_1	10	56431129	56431713	+	585	protein_coding	NA && sp|Q9SS03|DIR21_ARATH Dirigent protein 21 OS=Arabidopsis thaliana OX=3702 GN=DIR21 PE=3 SV=1 && PF03018:Dirigent-like protein	B3
Solyc01g101090_3	328.108899352969	401.509810021861	342.886407290196	73.9154098924008	60.1423981300644	86.2663981135112	357.501705555009	73.4414020453255	2.2807800410704	1.10789490594299e-20	3.60286687269866e-19	Solyc01g101090_3	1	90816729	90823228	+	1858	protein_coding	NA && sp|Q96CN4|EVI5L_HUMAN EVI5-like protein OS=Homo sapiens OX=9606 GN=EVI5L PE=1 SV=1 && PF00566:Rab-GTPase-TBC domain	-
Solyc08g078080_3	746.415065858747	920.42014928988	685.772814580391	199.417616272206	232.656119082091	290.89831921998	784.202676576339	240.990684858092	1.70108923156999	1.19607225694058e-20	3.88316858609049e-19	Solyc08g078080_3	8	62042685	62050532	-	3324	protein_coding	NA && sp|O23522|PLA14_ARATH Phospholipase A1-Ibeta2, chloroplastic OS=Arabidopsis thaliana OX=3702 GN=At4g16820 PE=1 SV=2 && PF01764:Lipase (class 3)|PF13041:PPR repeat family|PF14432:DYW family of nucleic acid deaminases|PF01535:PPR repeat	bHLH
Solyc05g014260_3	892.822224135769	1390.02226627451	1018.22921708609	340.318866379595	339.488010497337	425.982136420982	1100.35790249879	368.596337765971	1.57752967391154	1.31334709247849e-20	4.24981752552916e-19	Solyc05g014260_3	5	8044515	8050118	+	3350	protein_coding	NA && sp|Q9FXD6|ARR11_ARATH Two-component response regulator ARR11 OS=Arabidopsis thaliana OX=3702 GN=ARR11 PE=1 SV=1 && PF00072:Response regulator receiver domain|PF00249:Myb-like DNA-binding domain	ARR-B
Solyc03g120780_3	746.415065858747	692.663122552333	658.394052021098	246.384699641336	277.76291767964	239.405973059202	699.157413477393	254.517863460059	1.4586197253229	1.36318915935805e-20	4.40382082058624e-19	Solyc03g120780_3	3	70544143	70545393	-	715	protein_coding	NA && sp|Q8LEM8|RL373_ARATH 60S ribosomal protein L37-3 OS=Arabidopsis thaliana OX=3702 GN=RPL37C PE=3 SV=1 && -	GRAS
Solyc04g008810_3	918.96635954238	790.105561826645	818.755375582672	322.609966092874	360.854388780386	297.585636903198	842.609098983899	327.016663925486	1.36623071147623	1.57556488999853e-20	5.08152122759492e-19	Solyc04g008810_3	4	2432046	2434439	+	843	protein_coding	NA && sp|Q9LYK9|RS263_ARATH 40S ribosomal protein S26-3 OS=Arabidopsis thaliana OX=3702 GN=RPS26C PE=2 SV=1 && PF01283:Ribosomal protein S26e	-
Solyc04g008620_3	433.992647749744	544.738455702174	521.500239224632	146.290915412043	83.8828184445635	113.015668846383	500.077114225517	114.396467567663	2.12796964068462	1.78231412696875e-20	5.73185066854179e-19	Solyc04g008620_3	4	2230234	2248207	-	5596	protein_coding	NA && sp|Q8RUS5|ATG9_ARATH Autophagy-related protein 9 OS=Arabidopsis thaliana OX=3702 GN=ATG9 PE=2 SV=1 && PF00168:C2 domain|PF04109:Autophagy protein Apg9	ERF
Solyc04g076990_3	789.552889279655	798.323598873876	834.400382759411	1919.49080064328	1492.48109043818	1611.64356165552	807.425623637647	1674.53848424566	-1.05239734482616	1.88754355138821e-20	6.05777706647985e-19	Solyc04g076990_3	4	62031659	62035406	+	3307	protein_coding	NA && sp|F4I2N7|RLK7_ARATH Receptor-like protein kinase 7 OS=Arabidopsis thaliana OX=3702 GN=RLK7 PE=1 SV=1 && PF08263:Leucine rich repeat N-terminal domain|PF00069:Protein kinase domain	MYB_related
ENSRNA050030066	342.488173826605	459.036069352479	448.490205733184	78.5351230106758	110.788628134329	71.5542992104318	416.671482970756	86.9593501184789	2.26378886314263	1.93989232995129e-20	6.21559282216963e-19	SSU_rRNA_eukarya	11	18782472	18783074	-	603	rRNA	Eukaryotic small subunit ribosomal RNA && - && -	-
Solyc09g064480_2	1202.63022870411	1297.27584817005	976.509197948123	423.473702508546	525.454636294247	446.712821238957	1158.80509160743	465.213720013917	1.31759235854127	1.9701496057526e-20	6.30104226963865e-19	Solyc09g064480_2	9	61986781	61988586	+	1806	protein_coding	NA && sp|Q7XJ98|MUR3_ARATH Xyloglucan galactosyltransferase MUR3 OS=Arabidopsis thaliana OX=3702 GN=MUR3 PE=1 SV=1 && PF03016:Exostosin family	NAC
Solyc04g005255_1	126.799056722064	237.14906907724	160.361323561574	663.698784658849	682.141410369941	667.394304785149	174.769816453626	671.078166604646	-1.93722784103688	1.97299837119502e-20	6.30104226963865e-19	Solyc04g005255_1	4	185839	199956	-	4513	protein_coding	NA && sp|Q9SI52|P4KG7_ARATH Phosphatidylinositol 4-kinase gamma 7 OS=Arabidopsis thaliana OX=3702 GN=PI4KG7 PE=1 SV=2 && PF00454:Phosphatidylinositol 3- and 4-kinase	bHLH
Solyc04g079360_1	520.268294591561	511.86630751325	404.16268539909	116.262780143255	135.320395792645	86.2663981135112	478.7657625013	112.616524683137	2.09127045679475	1.98562417913847e-20	6.33103657247456e-19	Solyc04g079360_1	4	63974716	63975474	+	759	protein_coding	NA && sp|Q9SN12|MYB77_ARATH Transcription factor MYB77 OS=Arabidopsis thaliana OX=3702 GN=MYB77 PE=1 SV=1 && PF13921:Myb-like DNA-binding domain	MYB
Solyc01g103050_3	1326.81487188551	967.380360988344	1229.43681397207	435.022985304234	522.28924691898	432.6694541042	1174.54401561531	463.327228775805	1.34198927665307	2.02059580198482e-20	6.43206569357022e-19	Solyc01g103050_3	1	91610827	91618031	+	4045	protein_coding	NA && sp|Q8L7G0|ARFA_ARATH Auxin response factor 1 OS=Arabidopsis thaliana OX=3702 GN=ARF1 PE=1 SV=2 && PF02309:AUX/IAA family|PF06507:Auxin response factor|PF02362:B3 DNA binding domain	ARF
Solyc01g110480_3	975.176250666594	1182.22332950881	1049.51923143957	486.609781791639	418.622744879001	472.793360203507	1068.97293720499	459.341962291382	1.21870095891368	2.05658293000699e-20	6.53599415921216e-19	Solyc01g110480_3	1	97093044	97095670	+	1932	protein_coding	NA && sp|Q8H1F0|BZP29_ARATH bZIP transcription factor 29 OS=Arabidopsis thaliana OX=3702 GN=BZIP29 PE=2 SV=1 && PF00170:bZIP transcription factor	bZIP
Solyc05g015390_3	422.227786816769	511.86630751325	761.390349267963	1525.27528121715	1577.94660357037	1619.66834287538	565.161481199327	1574.2967425543	-1.47852698734666	2.15537767420032e-20	6.8388701341685e-19	Solyc05g015390_3	5	10448598	10450425	+	1257	protein_coding	NA && sp|Q9FYF7|Y1736_ARATH REF/SRPP-like protein At1g67360 OS=Arabidopsis thaliana OX=3702 GN=At1g67360 PE=2 SV=1 && PF05755:Rubber elongation factor protein (REF)	-
Solyc12g005200_2	546.412429998172	572.914582721252	761.390349267963	119.342588888772	176.47045767111	78.2416168936497	626.905787329129	124.684887817844	2.3335552940665	2.36377588360808e-20	7.47587083576663e-19	Solyc12g005200_2	12	129170	136158	-	3467	protein_coding	NA && sp|Q9C6I6|ETFA_ARATH Electron transfer flavoprotein subunit alpha, mitochondrial OS=Arabidopsis thaliana OX=3702 GN=ETFA PE=1 SV=1 && PF07228:Stage II sporulation protein E (SpoIIE)	C2H2
Solyc10g049630_2	1109.81854801064	1333.67001223636	1456.28941803478	604.412466307652	564.230656141262	583.134101976603	1299.92599276059	583.925741475173	1.15466040361736	2.37415425957507e-20	7.49658353866147e-19	Solyc10g049630_2	10	46215750	46218841	-	1599	protein_coding	NA && sp|O81760|P2C63_ARATH Probable protein phosphatase 2C 63 OS=Arabidopsis thaliana OX=3702 GN=At4g33920 PE=2 SV=1 && PF00481:Protein phosphatase 2C	LBD
Solyc12g042650_2	1082.3672058337	1035.47266795112	920.447922231475	473.520594623193	420.205439566634	407.926378676293	1012.7625986721	433.88413762204	1.22348572799755	2.48715141855479e-20	7.84073483430712e-19	Solyc12g042650_2	12	58935945	58938257	-	889	protein_coding	NA && sp|Q9XHS0|RS12_HORVU 40S ribosomal protein S12 OS=Hordeum vulgare OX=4513 GN=RPS12 PE=2 SV=1 && PF01248:Ribosomal protein L7Ae/L30e/S12e/Gadd45 family	GATA
Solyc07g005920_2	230.068391578178	273.543233143549	203.385093297606	35.4178005734421	15.8269468763327	25.4118071962281	235.665572673111	25.552184882001	3.20439527253379	2.62245059262342e-20	8.2539735131493e-19	Solyc07g005920_2	7	751805	755174	-	3276	protein_coding	NA && sp|Q9ZUI0|Y2241_ARATH Putative leucine-rich repeat receptor-like serine/threonine-protein kinase At2g24130 OS=Arabidopsis thaliana OX=3702 GN=At2g24130 PE=3 SV=1 && PF00069:Protein kinase domain|PF08263:Leucine rich repeat N-terminal domain|PF13855:Leucine rich repeat	WRKY
Solyc06g069860_3	1371.25990207675	1427.59043563328	1550.15946109522	750.703381719696	629.912485678043	545.016391182261	1449.66993293508	641.877419526666	1.17625117972888	2.68197943567459e-20	8.42778674353153e-19	Solyc06g069860_3	6	43615730	43617518	+	603	protein_coding	NA && sp|P41098|RL34_TOBAC 60S ribosomal protein L34 OS=Nicotiana tabacum OX=4097 GN=RPL34 PE=2 SV=1 && PF01199:Ribosomal protein L34e	LSD
Solyc02g067700_1	320.265658730986	348.67957186109	276.395126789055	23.8685177777544	61.7250928176977	31.4303931111243	315.113452460377	39.0080012355255	3.0190273781302	2.83346864310135e-20	8.88955378621718e-19	Solyc02g067700_1	2	38397230	38397742	-	513	protein_coding	NA && sp|Q9XF63|ATL3_ARATH RING-H2 finger protein ATL3 OS=Arabidopsis thaliana OX=3702 GN=ATL3 PE=2 SV=1 && PF13639:Ring finger domain	HD-ZIP
Solyc11g006720_2	475.823264400322	430.859942333401	435.452699752568	66.215888028609	117.119406884862	109.003278236452	447.37863549543	97.4461910499745	2.19778146339623	3.15669148697073e-20	9.88776787846816e-19	Solyc11g006720_2	11	1335498	1337295	+	721	protein_coding	NA && sp|Q8S9H7|DIV_ANTMA Transcription factor DIVARICATA OS=Antirrhinum majus OX=4151 GN=DIVARICATA PE=2 SV=1 && PF00249:Myb-like DNA-binding domain	MYB
Solyc04g040180_3	892.822224135769	974.424392743113	877.424152495443	390.365758494242	250.065760646057	305.610418123059	914.890256458108	315.347312421119	1.53679508112124	3.27751535740901e-20	1.02498271808301e-18	Solyc04g040180_3	4	11959993	11962254	+	1179	protein_coding	NA && sp|Q55EX9|Y8948_DICDI Putative methyltransferase DDB_G0268948 OS=Dictyostelium discoideum OX=44689 GN=DDB_G0268948 PE=1 SV=2 && PF08241:Methyltransferase domain	-
Solyc01g066840_3	1202.63022870411	1097.69494845158	1230.74056457013	561.295143870419	406.752534721751	377.164717333491	1177.02191390861	448.40413197522	1.39295493727792	3.48536518044922e-20	1.08824552053675e-18	Solyc01g066840_3	1	74869729	74871617	+	654	protein_coding	NA && sp|Q3E902|RS212_ARATH 40S ribosomal protein S21-2 OS=Arabidopsis thaliana OX=3702 GN=RPS21C PE=1 SV=2 && -	-
Solyc01g104910_3	49.6738572725611	89.2244022270802	80.832537079818	347.248436057008	376.681335656719	496.19897209477	73.2435988598198	406.709581269499	-2.47060394213042	3.50842757741064e-20	1.09370201724472e-18	Solyc01g104910_3	1	93119035	93123953	-	2887	protein_coding	NA && - && -	-
Solyc02g079170_3	376.4755498552	336.939518936474	315.507644730902	29.2581830824086	49.0635353166315	71.5542992104318	342.974237840859	49.9586725364907	2.77321386288064	3.66773848348277e-20	1.14154715884169e-18	Solyc02g079170_3	2	44337085	44343054	+	2276	protein_coding	NA && sp|Q94BV7|NDB2_ARATH External alternative NAD(P)H-ubiquinone oxidoreductase B2, mitochondrial OS=Arabidopsis thaliana OX=3702 GN=NDB2 PE=1 SV=1 && PF00036:EF hand|PF07992:Pyridine nucleotide-disulphide oxidoreductase	-
Solyc07g041900_3	528.111535213544	535.346413362481	418.503941977767	1218.06435885185	1053.28331461994	1263.90304212819	493.987296851264	1178.4169052	-1.25389555625839	3.79220880777606e-20	1.17841383856876e-18	Solyc07g041900_3	7	54626103	54628551	-	1552	protein_coding	NA && sp|Q40143|CYSP3_SOLLC Cysteine proteinase 3 OS=Solanum lycopersicum OX=4081 GN=CYP-3 PE=2 SV=1 && PF08246:Cathepsin propeptide inhibitor domain (I29)|PF00112:Papain family cysteine protease	BBR-BPC
Solyc12g088360_2	403.926892032141	585.828640938329	589.295270323834	66.215888028609	108.414586102879	133.746353664359	526.350267764768	102.792275931949	2.35382517777397	3.86628497443714e-20	1.19763071114804e-18	Solyc12g088360_2	12	64753570	64755991	+	1674	protein_coding	NA && sp|O22193|PUB4_ARATH U-box domain-containing protein 4 OS=Arabidopsis thaliana OX=3702 GN=PUB4 PE=1 SV=3 && PF00514:Armadillo/beta-catenin-like repeat	HSF
Solyc03g005750_3	283.66386916173	361.593630078167	349.405160280503	975.529420142415	850.698394602885	815.852757352587	331.554219840134	880.693524032629	-1.40818547306639	3.97777050667543e-20	1.23021821815458e-18	Solyc03g005750_3	3	525187	537712	+	3119	protein_coding	NA && - && PF06972:Protein of unknown function (DUF1296)	-
Solyc04g007580_1	1218.31670994808	1054.2567526305	1162.94553347093	520.487677992322	390.134240501602	507.567412156241	1145.17299868317	472.729776883388	1.27534682519336	4.08711395272626e-20	1.26204148032369e-18	Solyc04g007580_1	4	1262147	1262641	+	495	protein_coding	NA && - && PF14009:Domain of unknown function (DUF4228)	bHLH
Solyc08g061270_1	308.500797798011	312.285407794781	205.99259449373	13.8591393548251	42.7327565660984	22.0681483546192	275.592933362174	26.2200147585142	3.39903795001671	4.17197426589523e-20	1.28621638115639e-18	Solyc08g061270_1	8	48516630	48516980	-	351	protein_coding	NA && - && PF07911:Protein of unknown function (DUF1677)	-
Solyc12g017510_2	389.547617558505	349.853577153551	464.135212909922	55.4365574193006	56.9770087547979	101.647228784912	401.17880254066	71.3535983196703	2.48515764838492	5.75741350671869e-20	1.7694330332972e-18	Solyc12g017510_2	12	6776364	6804790	+	4989	protein_coding	NA && sp|Q8VZE7|RAP_ARATH RAP domain-containing protein, chloroplastic OS=Arabidopsis thaliana OX=3702 GN=RAP PE=1 SV=1 && -	-
Solyc06g073165_1	83.6612333011555	131.488592755697	123.85630681585	485.06987741888	657.609642711625	422.638477579373	113.002044290901	521.772665903293	-2.20442861906329	5.96078630827137e-20	1.8290644758155e-18	Solyc06g073165_1	6	45222416	45223642	+	1227	protein_coding	NA && sp|Q9XI99|USPL1_ARATH BURP domain protein USPL1 OS=Arabidopsis thaliana OX=3702 GN=USPL1 PE=2 SV=1 && PF03181:BURP domain	-
Solyc06g065560_2	694.126795045525	610.482752080023	627.10403766762	204.807281576861	242.152287207891	233.387387144306	643.904528264389	226.782318643019	1.50509789891368	6.45626836842117e-20	1.97800259543946e-18	Solyc06g065560_2	6	41066571	41069953	-	2238	protein_coding	NA && sp|O48780|KCS11_ARATH 3-ketoacyl-CoA synthase 11 OS=Arabidopsis thaliana OX=3702 GN=KCS11 PE=1 SV=1 && PF08392:FAE1/Type III polyketide synthase-like protein|PF08541:3-Oxoacyl-[acyl-carrier-protein (ACP)] synthase III C terminal	-
Solyc01g110430_3	624.844836218005	646.876916146332	717.062828933869	257.933982437024	185.96662579691	193.263481044998	662.928193766069	212.388029759644	1.64267243428447	6.83535637510331e-20	2.09087143367809e-18	Solyc01g110430_3	1	97060628	97063447	-	2483	protein_coding	NA && sp|P49726|SPE1_SOLLC Arginine decarboxylase OS=Solanum lycopersicum OX=4081 PE=2 SV=1 && PF02784:Pyridoxal-dependent decarboxylase, pyridoxal binding domain	G2-like
Solyc02g062890_2	70.58916559785	51.6562328683096	36.5050167457242	327.999631397529	294.381211899789	343.728128917401	52.9168050706279	322.036324071573	-2.60625108970404	7.27048196071645e-20	2.21704400848825e-18	Solyc02g062890_2	2	35380590	35382942	-	1746	protein_coding	NA && sp|Q8GXR2|PLT6_ARATH Probable polyol transporter 6 OS=Arabidopsis thaliana OX=3702 GN=PLT6 PE=2 SV=2 && PF00083:Sugar (and other) transporter	GRAS
Solyc03g114130_1	227.453978037517	169.056762114468	245.105112435577	30.0281352687878	18.9923362515993	22.7368801229409	213.87195086252	23.9191172144427	3.15984328296669	7.33779318691909e-20	2.23408984790536e-18	Solyc03g114130_1	3	65634231	65634656	+	426	protein_coding	NA && - && -	-
Solyc01g112280_3	125.491849951733	144.402650972775	138.197563394527	451.191981218197	484.304574415782	480.149409655047	136.030688106345	471.881988429675	-1.79361798275021	7.4195620816231e-20	2.25265036840085e-18	Solyc01g112280_3	1	98256976	98260811	-	1772	protein_coding	NA && sp|Q99JW2|ACY1_MOUSE Aminoacylase-1 OS=Mus musculus OX=10090 GN=Acy1 PE=1 SV=1 && PF01546:Peptidase family M20/M25/M40	ERF
Solyc04g079400_3	730.72858461478	1150.52518661235	1014.31796529191	269.483265232711	341.862052528787	339.047006539149	965.19057883968	316.797441433549	1.60747748076295	7.42176782764749e-20	2.25265036840085e-18	Solyc04g079400_3	4	63996195	64001331	-	2757	protein_coding	NA && sp|Q9C5H5|M3K5G_ARATH Mitogen-activated protein kinase kinase kinase 5 OS=Arabidopsis thaliana OX=3702 GN=MAPKKK5 PE=1 SV=1 && PF00069:Protein kinase domain	WRKY
Solyc03g083560_1	264.055767606772	266.499201388779	202.081342699545	661.388928099711	716.169346154056	871.357494123296	244.212103898365	749.638589459021	-1.61767991919821	1.08117280768545e-19	3.27142504730418e-18	Solyc03g083560_1	3	54939827	54940876	+	1050	protein_coding	NA && sp|Q9FHM9|EXOL3_ARATH Protein EXORDIUM-like 3 OS=Arabidopsis thaliana OX=3702 GN=EXL3 PE=2 SV=1 && PF04674:Phosphate-induced protein 1 conserved region	MYB
Solyc10g080940_2	266.670181147433	329.895487181705	439.363951546752	1004.01765103844	1009.75921071003	941.574329797084	345.309873291963	985.117063848519	-1.51259908249637	1.22104641460682e-19	3.68895457696879e-18	Solyc10g080940_2	10	62254764	62258583	-	2583	nontranslating_CDS	NA && sp|Q43594|TBB1_ORYSJ Tubulin beta-1 chain OS=Oryza sativa subsp. japonica OX=39947 GN=TUBB1 PE=2 SV=2 && PF03953:Tubulin C-terminal domain|PF00091:Tubulin/FtsZ family, GTPase domain	NAC
Solyc03g111310_3	513.732260739908	420.293894701246	396.34018181072	1104.88138745412	1021.62942086728	1013.79736077584	443.455445750625	1046.76938969908	-1.23953256401827	1.24223365433142e-19	3.74718154866659e-18	Solyc03g111310_3	3	63409700	63414490	+	1735	protein_coding	NA && sp|Q8LBB2|KING1_ARATH SNF1-related protein kinase regulatory subunit gamma-1 OS=Arabidopsis thaliana OX=3702 GN=KING1 PE=1 SV=2 && PF00571:CBS domain	WRKY
Solyc12g009300_2	2179.11368614103	1939.45674314653	1830.46583967846	993.238320429136	784.225217722287	1063.95224339997	1983.01208965534	947.138593850465	1.06514830379164	1.28122743448675e-19	3.85885992076108e-18	Solyc12g009300_2	12	2563363	2579546	-	3715	protein_coding	NA && sp|P49037|SUS_SOLLC Sucrose synthase OS=Solanum lycopersicum OX=4081 PE=2 SV=1 && PF00534:Glycosyl transferases group 1|PF00862:Sucrose synthase	HB-other
Solyc06g050300_2	532.033155524536	579.958614476022	477.172718890538	135.511584802735	121.867490947762	179.22011391024	529.721496297032	145.533063220246	1.86146522530096	1.36646701122137e-19	4.10926646369906e-18	Solyc06g050300_2	6	32959960	32962314	-	1688	protein_coding	NA && sp|Q5W736|CIPKI_ORYSJ CBL-interacting protein kinase 18 OS=Oryza sativa subsp. japonica OX=39947 GN=CIPK18 PE=2 SV=1 && PF03822:NAF domain|PF00069:Protein kinase domain	bHLH
Solyc10g024490_2	511.117847199247	730.231291911104	572.346512549034	126.272158566185	172.513720952027	78.9103486619715	604.565217219795	125.898742726728	2.26787184183468	1.41109293668737e-19	4.23695804011175e-18	Solyc10g024490_2	10	14851859	14855783	-	2833	protein_coding	NA && sp|Q9LQL2|PTR14_ARATH Protein NRT1/ PTR FAMILY 7.3 OS=Arabidopsis thaliana OX=3702 GN=NPF7.3 PE=1 SV=2 && PF00854:POT family	G2-like
Solyc05g009340_1	469.287230548669	299.371349577703	340.278906094072	1.53990437275835	0	0	369.645828740148	0.513301457586117	9.54787092066754	1.53759160021382e-19	4.60971374538835e-18	Solyc05g009340_1	5	3485365	3485721	-	357	protein_coding	NA && - && -	-
Solyc01g100490_3	57.5170978945444	58.7002646230791	82.1362876778795	331.849392329424	357.68899940512	314.303931111243	66.117883398501	334.614107615262	-2.34094471552016	1.61235676700437e-19	4.82646917853891e-18	CHLN	1	90378790	90379743	+	954	protein_coding	NA && sp|Q9XGI7|NAS_SOLLC Nicotianamine synthase OS=Solanum lycopersicum OX=4081 GN=CHLN PE=2 SV=1 && PF03059:Nicotianamine synthase protein	-
Solyc07g051950_3	141.1783311957	91.5724128120034	200.777592101483	3.0798087455167	0	4.01239060993076	144.509445369729	2.36406645181582	5.89264857586047	1.69345000061263e-19	5.05376077164535e-18	Solyc07g051950_3	7	60632183	60634858	-	1295	protein_coding	NA && sp|Q5E930|SLAH1_ARATH S-type anion channel SLAH1 OS=Arabidopsis thaliana OX=3702 GN=SLAH1 PE=2 SV=1 && PF03595:Voltage-dependent anion channel	GRF
Solyc03g118450_1	471.90164408933	524.780365730327	704.025322953253	110.873114838601	155.895426731877	163.170551470517	566.902444257637	143.313031013665	1.98256177859356	1.81099649426538e-19	5.39632851875697e-18	Solyc03g118450_1	3	68808975	68809196	-	222	protein_coding	NA && - && -	-
Solyc10g008340_3	609.158354974039	488.386201664018	631.015289461805	130.89187168446	196.254141266526	155.814502018978	576.18661536662	160.986838323321	1.83976909049595	1.81613612256979e-19	5.40341897743902e-18	Solyc10g008340_3	10	2458576	2463215	-	2152	protein_coding	NA && - && PF07223:UBA-like domain (DUF1421)	-
Solyc03g031530_3	715.042103370813	563.522540381559	667.520306207529	166.309672257902	96.5443759456297	197.275871654929	648.694983319967	153.37663995282	2.07718955747464	1.8314210913356e-19	5.44062681412398e-18	Solyc03g031530_3	3	4058071	4062827	-	1712	protein_coding	NA && sp|Q9SYB0|TAUE2_ARATH Sulfite exporter TauE/SafE family protein 2 OS=Arabidopsis thaliana OX=3702 GN=At1g61740 PE=2 SV=1 && PF01925:Sulfite exporter TauE/SafE	C2H2
Solyc06g071350_3	188.2377749276	150.272677435083	178.613831934436	538.196578279043	549.195056608746	541.672732340652	172.374761432373	543.021455742814	-1.65718789648732	2.0682657028322e-19	6.13491479762819e-18	Solyc06g071350_3	6	44053205	44060383	+	5365	protein_coding	NA && - && PF01426:BAH domain|PF08711:TFIIS helical bundle-like domain	LBD
Solyc01g107390_3	329.4161061233	537.694423947405	342.886407290196	80.8449795698134	31.6538937526655	58.8483956123177	403.332312453633	57.1157563115989	2.81941590379498	2.13182174799997e-19	6.31386904093729e-18	Solyc01g107390_3	1	94843134	94845241	-	1887	protein_coding	NA && sp|O82333|GH31_ARATH Probable indole-3-acetic acid-amido synthetase GH3.1 OS=Arabidopsis thaliana OX=3702 GN=GH3.1 PE=2 SV=1 && PF03321:GH3 auxin-responsive promoter	ERF
Solyc06g075690_3	1304.59235678989	1431.11245151067	1062.55673742019	599.022801002998	532.576762388597	537.660341730721	1266.08718190692	556.419968374105	1.18681879209611	2.45493209999919e-19	7.25984980690092e-18	Solyc06g075690_3	6	47178727	47182139	+	2186	protein_coding	NA && sp|Q9FJF5|SOK5_ARATH Protein SOSEKI 5 OS=Arabidopsis thaliana OX=3702 GN=SOK5 PE=1 SV=1 && PF06136:Domain of unknown function (DUF966)	C2H2
Solyc02g087060_3	160.786432750658	139.706629802928	176.006330738313	545.896100142835	489.844005822498	525.623169900929	158.8331310973	520.454425288754	-1.7139787217192	2.52724851143331e-19	7.46243500879788e-18	Solyc02g087060_3	2	50222991	50231064	+	2179	protein_coding	NA && sp|Q94JU2|WTR18_ARATH WAT1-related protein At3g28050 OS=Arabidopsis thaliana OX=3702 GN=At3g28050 PE=2 SV=1 && PF00892:EamA-like transporter family	GRAS
Solyc11g008680_2	60.1315114352055	39.9161799436938	23.4675107651084	279.492643655641	422.579481598084	276.1862203169	41.1717340480026	326.086115190208	-2.98572729308527	2.81275062356944e-19	8.28048405377727e-18	Solyc11g008680_2	11	2859733	2864222	+	1533	protein_coding	NA && sp|P46253|STAD_SOLTU Stearoyl-[acyl-carrier-protein] 9-desaturase, chloroplastic OS=Solanum tuberosum OX=4113 PE=2 SV=1 && PF03405:Fatty acid desaturase	G2-like
Solyc01g017600_3	364.710688922225	277.065249020933	411.985188987459	1.53990437275835	0	0	351.253708976872	0.513301457586117	9.47418024003747	2.83868773808975e-19	8.34429277005752e-18	Solyc01g017600_3	1	24247348	24249508	-	1458	protein_coding	NA && - && PF04819:Family of unknown function (DUF716)	-
Solyc08g065940_3	79.7396129901638	109.182492198927	151.235069375143	446.572268099921	485.887269103415	565.078344231915	113.385724854745	499.17929381175	-2.13904589226406	3.16411709732417e-19	9.28694458985236e-18	Solyc08g065940_3	8	54359527	54360489	-	963	protein_coding	NA && sp|O82199|C3H20_ARATH Zinc finger CCCH domain-containing protein 20 OS=Arabidopsis thaliana OX=3702 GN=At2g19810 PE=2 SV=1 && -	C3H
Solyc09g084460_3	332.030519663961	237.14906907724	219.030100474345	0	0	0	262.736563071849	0	10.9115773980157	3.69270723533194e-19	1.08059984373832e-17	Solyc09g084460_3	9	69553041	69554808	+	645	protein_coding	NA && sp|P05118|ICI1_SOLLC Wound-induced proteinase inhibitor 1 OS=Solanum lycopersicum OX=4081 GN=PIIF PE=2 SV=1 && PF00280:Potato inhibitor I family	-
Solyc06g069070_1	194.773808779253	217.190979105393	174.702580140252	592.863183511965	580.057603017595	573.103125451776	195.555789341632	582.007970660445	-1.57196520279791	3.97865564672221e-19	1.16253942680419e-17	Solyc06g069070_1	6	42985597	42985881	+	285	protein_coding	NA && sp|P86809|NLTP2_APIGA Non-specific lipid-transfer protein 2 OS=Apium graveolens var. rapaceum OX=278110 PE=1 SV=1 && -	bHLH
Solyc06g065590_3	1133.34826987659	1138.78513368773	1070.37924100856	526.647295483356	528.620025669514	575.109320756742	1114.17088152429	543.458880636537	1.03526635449	4.27846151306784e-19	1.24827780985587e-17	Solyc06g065590_3	6	41093460	41096078	-	1126	protein_coding	NA && sp|Q9ATF5|RL18A_CASSA 60S ribosomal protein L18a OS=Castanea sativa OX=21020 GN=RPL18A PE=2 SV=1 && PF01775:Ribosomal proteins 50S-L18Ae/60S-L20/60S-L18A	-
Solyc07g043310_3	1180.40771360849	1030.77664678127	928.270425819845	381.896284444071	489.844005822498	373.821058491882	1046.48492873654	415.187116252817	1.33463348245604	4.72526624234291e-19	1.37658537539207e-17	Solyc07g043310_3	7	57117187	57124219	+	2200	protein_coding	NA && sp|Q84P54|GATP1_SOLLC Gamma aminobutyrate transaminase 1, mitochondrial OS=Solanum lycopersicum OX=4081 GN=GABA-TP1 PE=1 SV=1 && PF00202:Aminotransferase class-III	ERF
Solyc02g064830_3	237.911632200161	325.199466011858	207.296345091791	0	0	0	256.80248110127	0	10.8798000903629	5.10574093230564e-19	1.48521679393384e-17	Solyc02g064830_3	2	36524739	36526903	-	1901	protein_coding	NA && sp|O82333|GH31_ARATH Probable indole-3-acetic acid-amido synthetase GH3.1 OS=Arabidopsis thaliana OX=3702 GN=GH3.1 PE=2 SV=1 && PF03321:GH3 auxin-responsive promoter	ERF
Solyc01g058260_3	549.026843538833	590.524662108176	634.926541255989	165.539720071523	82.3001237569302	163.170551470517	591.492682300999	137.003465099657	2.1078258271209	5.80507626810393e-19	1.68614210831856e-17	Solyc01g058260_3	1	65866151	65871282	-	2447	protein_coding	NA && sp|Q56XM9|PAPS3_ARATH Nuclear poly(A) polymerase 3 OS=Arabidopsis thaliana OX=3702 GN=PAPS3 PE=1 SV=1 && PF04928:Poly(A) polymerase central domain	MYB_related
Solyc02g081970_3	81.0468197604944	89.2244022270802	162.968824757697	512.788156128531	482.721879728149	536.991609962399	111.080015581757	510.833881939693	-2.2035934114578	6.27228905012299e-19	1.81914967013715e-17	Solyc02g081970_3	2	46274126	46278331	-	2561	protein_coding	NA && sp|Q9FYH7|VSR6_ARATH Vacuolar-sorting receptor 6 OS=Arabidopsis thaliana OX=3702 GN=VSR6 PE=2 SV=3 && PF02225:PA domain	WRKY
Solyc01g107890_3	35.294582798925	39.9161799436938	20.8600095689853	267.173408673574	229.490729706825	240.074704827524	32.0235907705347	245.579614402641	-2.93399626950288	6.42344384070918e-19	1.86023313712372e-17	Solyc01g107890_3	1	95174795	95179526	+	2928	protein_coding	NA && sp|Q9SLN1|FPP7_ARATH Filament-like plant protein 7 OS=Arabidopsis thaliana OX=3702 GN=FPP7 PE=3 SV=2 && PF05911:Filament-like plant protein, long coiled-coil	B3
Solyc08g013730_3	338.566553515614	293.501323115396	280.30637858324	744.543764228662	876.812856948834	752.991971130338	304.124751738083	791.449530769278	-1.37996823157414	6.70177667684744e-19	1.93797166916754e-17	Solyc08g013730_3	8	3186919	3191807	-	2696	protein_coding	NA && sp|Q0IWF3|NIP31_ORYSJ Aquaporin NIP3-1 OS=Oryza sativa subsp. japonica OX=39947 GN=NIP3-1 PE=2 SV=2 && PF00230:Major intrinsic protein	BES1
Solyc02g090560_3	295.428730094705	250.063127294317	281.610129181301	15.3990437275835	49.0635353166315	30.7616613428025	275.700662190108	31.7414134623391	3.12063963064478	6.83550249280186e-19	1.97372614014133e-17	Solyc02g090560_3	2	52734175	52736988	-	2722	protein_coding	NA && sp|Q9LIK7|ACA13_ARATH Putative calcium-transporting ATPase 13, plasma membrane-type OS=Arabidopsis thaliana OX=3702 GN=ACA13 PE=3 SV=1 && PF00689:Cation transporting ATPase, C-terminus	MYB_related
Solyc02g067750_3	984.326698058908	706.751186061872	964.775442565569	4.61971311827505	14.2442521886995	1.33746353664359	885.284442228783	6.73380961453937	7.05352807550958	7.29089027584471e-19	2.10211721546704e-17	Solyc02g067750_3	2	38430301	38432844	-	1379	protein_coding	NA && sp|P27141|CAHC_TOBAC Carbonic anhydrase, chloroplastic OS=Nicotiana tabacum OX=4097 PE=2 SV=1 && PF00484:Carbonic anhydrase	bHLH
Solyc04g079125_1	166.01525983198	285.283286068164	183.828834326683	23.8685177777544	17.409641563966	7.35604945153972	211.709126742276	16.2114029310867	3.71981912908461	7.47879309990992e-19	2.15312253701377e-17	Solyc04g079125_1	4	63801780	63804337	-	1034	protein_coding	NA && sp|Q9FMZ4|Y5270_ARATH B3 domain-containing protein At5g42700 OS=Arabidopsis thaliana OX=3702 GN=At5g42700 PE=2 SV=2 && PF02362:B3 DNA binding domain	B3
Solyc10g049970_2	402.619685261811	277.065249020933	335.063903701826	806.139939138996	956.738938674314	1060.60858455836	338.249612661523	941.162487457224	-1.47830317670591	8.21186460754198e-19	2.36070005024742e-17	Solyc10g049970_2	10	47206486	47208385	+	1081	protein_coding	NA && sp|Q94LA9|CYL3_ARATH Cyclase-like protein 3 OS=Arabidopsis thaliana OX=3702 GN=CYCLASE3 PE=2 SV=1 && PF04199:Putative cyclase	-
Solyc06g075660_3	877.135742891802	691.489117259872	943.915432996584	145.520963225664	247.691718614607	282.873538000118	837.513431049419	225.36207328013	1.89195115481808	8.36269086743266e-19	2.39701902066953e-17	Solyc06g075660_3	6	47160989	47162126	-	712	protein_coding	NA && sp|Q9LX82|MYB48_ARATH Transcription factor MYB48 OS=Arabidopsis thaliana OX=3702 GN=MYB48 PE=2 SV=1 && PF00249:Myb-like DNA-binding domain	MYB
Solyc07g005050_3	1070.60234490072	976.772403328036	956.9529389772	377.276571325796	367.976514874736	484.8305320333	1001.44256240199	410.027872744611	1.28660569736783	8.57211125565239e-19	2.45345353877057e-17	Solyc07g005050_3	7	101122	103597	-	663	protein_coding	NA && sp|Q5SMI4|RL393_ORYSJ 60S ribosomal protein L39-3 OS=Oryza sativa subsp. japonica OX=39947 GN=RPL39C PE=3 SV=1 && -	-
Solyc01g094550_3	528.111535213544	480.168164616787	504.551481449831	124.732254193426	141.651174543178	177.213918605275	504.277060426721	147.865782447293	1.7674182315967	9.24971252514607e-19	2.64352732999685e-17	Solyc01g094550_3	1	85850994	85863805	+	3382	protein_coding	NA && sp|P58137|ACOT8_MOUSE Acyl-coenzyme A thioesterase 8 OS=Mus musculus OX=10090 GN=Acot8 PE=1 SV=1 && PF13622:Thioesterase-like superfamily|PF00027:Cyclic nucleotide-binding domain	BES1
Solyc05g008830_3	358.174655070572	390.943762389707	324.633898917333	883.135157776914	857.029173353418	819.865147962518	357.917438792537	853.343159697616	-1.25229805970513	9.42594627457537e-19	2.68996720433472e-17	Solyc05g008830_3	5	3057390	3060389	+	2299	protein_coding	NA && - && PF00564:PB1 domain	MYB
Solyc10g077130_1	375.168343084869	353.375593030936	387.213927624289	106.253401720326	64.0991348491476	69.5481039054664	371.919287913365	79.9668801583134	2.21845927389921	1.00570727173489e-18	2.8658997465435e-17	Solyc10g077130_1	10	60101374	60101991	+	618	protein_coding	NA && - && PF05678:VQ motif	-
Solyc07g048060_2	545.105223227841	521.258349852943	465.438963507984	121.65244544791	177.261805014927	115.69059591967	510.600845529589	138.201615460835	1.88778469884509	1.10195283399166e-18	3.13560038242076e-17	Solyc07g048060_2	7	59367806	59368321	+	516	protein_coding	NA && - && PF04526:Protein of unknown function (DUF568)	-
Solyc09g083210_3	315.036831649664	261.803180218933	302.470138750287	750.703381719696	743.075155843822	728.917627470754	293.103383539628	740.898721678091	-1.33907055967936	1.23034351559936e-18	3.48573589072196e-17	Solyc09g083210_3	9	69303107	69307023	+	1983	protein_coding	NA && sp|Q0GXS4|NFP_MEDTR Serine/threonine receptor-like kinase NFP OS=Medicago truncatula OX=3880 GN=NFP PE=1 SV=1 && PF00069:Protein kinase domain	GeBP
Solyc03g113100_3	473.208850859661	435.555963503247	487.602723675031	1238.85306788409	987.601485083163	1001.76018894605	465.455846012646	1076.07158063777	-1.20946896615863	1.27413724701223e-18	3.59939175826239e-17	Solyc03g113100_3	3	64862411	64868216	-	1134	protein_coding	NA && sp|P42745|UBC2_ARATH Ubiquitin-conjugating enzyme E2 2 OS=Arabidopsis thaliana OX=3702 GN=UBC2 PE=2 SV=1 && PF00179:Ubiquitin-conjugating enzyme	WRKY
Solyc10g009410_1	751.643892940069	899.288054025572	917.840421035352	354.17800573442	364.81112549947	294.241978061589	856.257456000331	337.743703098493	1.34358816309083	1.28500366349211e-18	3.62485831702955e-17	Solyc10g009410_1	10	3460978	3462354	+	1377	protein_coding	NA && sp|Q9LNJ3|APF2_ARATH Aspartyl protease family protein 2 OS=Arabidopsis thaliana OX=3702 GN=APF2 PE=2 SV=1 && PF14543:Xylanase inhibitor N-terminal|PF14541:Xylanase inhibitor C-terminal	Trihelix
Solyc07g053550_2	1751.65707224294	1332.4960069439	1473.23817580959	755.323094837971	702.716441309174	760.348020581878	1519.13041833214	739.462518909674	1.03791970867965	1.50694812740722e-18	4.24482352377714e-17	Solyc07g053550_2	7	62101065	62101508	+	444	protein_coding	NA && sp|Q9SGP6|GRXC9_ARATH Glutaredoxin-C9 OS=Arabidopsis thaliana OX=3702 GN=GRXC9 PE=1 SV=1 && PF00462:Glutaredoxin	-
Solyc04g015210_3	322.880072271647	231.279042614932	233.371357053023	686.027398063845	773.146354908854	811.171634974334	262.510157313201	756.781795982345	-1.52898348900652	1.58489843137542e-18	4.45798226882709e-17	Solyc04g015210_3	4	5389515	5396797	-	5045	protein_coding	NA && sp|Q6L403|R1B17_SOLDE Putative late blight resistance protein homolog R1B-17 OS=Solanum demissum OX=50514 GN=R1B-17 PE=3 SV=1 && PF18052:Rx N-terminal domain|PF00931:NB-ARC domain	bHLH
Solyc06g061170_3	481.052091481644	834.717762940185	580.169016137403	176.319050680831	174.09641563966	176.545186836953	631.979623519744	175.653551052481	1.84813554402365	1.66123015207799e-18	4.66598316889969e-17	Solyc06g061170_3	6	39291655	39297319	+	2717	protein_coding	NA && sp|Q93XM7|MCAT_ARATH Mitochondrial carnitine/acylcarnitine carrier-like protein OS=Arabidopsis thaliana OX=3702 GN=BOU PE=1 SV=1 && PF00153:Mitochondrial carrier protein	ERF
Solyc06g073740_3	115.034195789089	68.0923069627718	125.160057413912	455.041742150092	431.284302380067	445.375357702314	102.762186721924	443.900467410824	-2.1153926715193	1.76488312530021e-18	4.95001675415505e-17	Solyc06g073740_3	6	45645596	45650948	+	2413	protein_coding	NA && sp|A7LXU3|BGH3B_BACO1 Beta-glucosidase BoGH3B OS=Bacteroides ovatus (strain ATCC 8483 / DSM 1896 / JCM 5824 / NCTC 11153) OX=411476 GN=BACOVA_02659 PE=1 SV=1 && PF00933:Glycosyl hydrolase family 3 N terminal domain|PF01915:Glycosyl hydrolase family 3 C-terminal domain	C2H2
Solyc10g076250_2	358.174655070572	407.379836484169	380.695174633981	64.6759836558507	96.5443759456297	102.984692321556	382.083222062907	88.0683506410122	2.11559842201527	1.93328631344714e-18	5.41458457201069e-17	Solyc10g076250_2	10	59244801	59248929	+	1750	protein_coding	NA && sp|Q9SR86|AGT23_ARATH Alanine--glyoxylate aminotransferase 2 homolog 3, mitochondrial OS=Arabidopsis thaliana OX=3702 GN=At3g08860 PE=2 SV=1 && PF00202:Aminotransferase class-III	ERF
Solyc02g070910_2	920.27356631271	763.103440100028	880.031653691566	385.746045375967	323.661063621005	296.916905134876	854.469553368102	335.441338043949	1.34939169092694	2.18477459125154e-18	6.11019031041877e-17	Solyc02g070910_2	2	41056266	41068536	+	7552	protein_coding	NA && sp|Q9FL28|FLS2_ARATH LRR receptor-like serine/threonine-protein kinase FLS2 OS=Arabidopsis thaliana OX=3702 GN=FLS2 PE=1 SV=1 && PF08263:Leucine rich repeat N-terminal domain|PF13855:Leucine rich repeat|PF00069:Protein kinase domain	C3H
novel.725	257.519733755119	311.111402502319	232.067606454961	26.1783743368919	37.9846725031986	52.8298096974216	266.899580904133	38.9976188458374	2.76972658534784	2.22852430158245e-18	6.2236548148473e-17	-	4	4174535	4176859	-	1427	-	- && - && -	-
Solyc07g009020_2	52.2882708132222	56.3522540381559	70.4025322953253	305.671017992532	267.475402210023	404.582719834684	59.6810190489011	325.909713345747	-2.45085379257183	2.35743806071259e-18	6.57429699637755e-17	Solyc07g009020_2	7	4011169	4011915	-	540	protein_coding	NA && - && -	-
Solyc01g097880_3	908.508705379735	803.019620043722	851.349140534212	289.50202207857	394.090977220685	290.229587451658	854.292488652556	324.607528916971	1.39698906933469	2.47390275502614e-18	6.88927371765956e-17	Solyc01g097880_3	1	88450456	88455688	+	800	protein_coding	NA && sp|Q94BU8|GSDA_ARATH Guanosine deaminase OS=Arabidopsis thaliana OX=3702 GN=GSDA PE=1 SV=1 && PF00383:Cytidine and deoxycytidylate deaminase zinc-binding region	GeBP
Solyc04g077120_3	334.644933204622	349.853577153551	271.180124396809	78.5351230106758	55.3943140671646	66.2044450638575	318.559544918327	66.7112940472326	2.25560089077862	2.57774789295212e-18	7.16826285515961e-17	Solyc04g077120_3	4	62156255	62164026	+	3303	protein_coding	NA && sp|Q9SUG3|ITPK3_ARATH Inositol-tetrakisphosphate 1-kinase 3 OS=Arabidopsis thaliana OX=3702 GN=ITPK3 PE=1 SV=2 && PF05770:Inositol 1,3,4-trisphosphate 5/6-kinase ATP-grasp domain|PF17927:Inositol 1,3,4-trisphosphate 5/6-kinase pre-ATP-grasp domain	NAC
Solyc06g054630_2	274.513421769416	251.237132586779	398.947683006843	0	0	1.33746353664359	308.23274578768	0.445821178881195	9.29377435375384	2.68630257188367e-18	7.45953836166902e-17	Solyc06g054630_2	6	37473694	37480765	+	579	protein_coding	NA && sp|Q84QC2|ERF17_ARATH Ethylene-responsive transcription factor ERF017 OS=Arabidopsis thaliana OX=3702 GN=ERF017 PE=2 SV=1 && PF00847:AP2 domain	ERF
Solyc01g080910_2	35.294582798925	14.088063509539	16.9487577748005	294.121735196845	276.180222992006	163.839283238839	22.1104680277548	244.713747142563	-3.47516526623766	3.11883885378896e-18	8.62394184189639e-17	Solyc01g080910_2	1	80103755	80105029	+	1275	protein_coding	NA && - && -	-
Solyc09g061840_3	490.202538873958	741.97134483572	700.114071159068	187.09838129014	201.002225329426	216.000361167939	644.095984956249	201.366989262501	1.67739738226377	3.32036118500143e-18	9.16822438910761e-17	Solyc09g061840_3	9	60689221	60695244	-	1840	protein_coding	NA && sp|C8YNG6|KAT1_PETHY 3-ketoacyl CoA thiolase 1, peroxisomal OS=Petunia hybrida OX=4102 GN=KAT1 PE=1 SV=1 && PF00108:Thiolase, N-terminal domain|PF02803:Thiolase, C-terminal domain	-
Solyc03g025520_3	1469.30040985154	1212.74746711281	1593.18323083125	686.797350250224	718.543388185506	667.394304785149	1425.07703593187	690.911681073626	1.04411528503449	4.1084863455802e-18	1.13284277728766e-16	Solyc03g025520_3	3	2934583	2936550	+	747	protein_coding	NA && sp|O80929|RL361_ARATH 60S ribosomal protein L36-1 OS=Arabidopsis thaliana OX=3702 GN=RPL36A PE=3 SV=1 && PF01158:Ribosomal protein L36e	BES1
Solyc10g084320_2	41.8306166505778	49.3082222833864	46.9350215302169	261.01379118254	242.152287207891	275.517488548579	46.024620154727	259.56118897967	-2.49449340865771	4.84629208478187e-18	1.33252612561481e-16	Solyc10g084320_2	10	64040422	64042632	+	2211	protein_coding	NA && sp|O82777|SBT3_SOLLC Subtilisin-like protease SBT3 OS=Solanum lycopersicum OX=4081 GN=sbt3 PE=1 SV=1 && PF00082:Subtilase family|PF17766:Fibronectin type-III domain|PF05922:Peptidase inhibitor I9	bHLH
Solyc10g007280_3	848.37719394453	1162.26523953697	741.834090297039	243.304890895819	280.13695971109	357.771496052159	917.492174592845	293.737782219689	1.64245981318767	5.02955824635051e-18	1.38097702368589e-16	Solyc10g007280_3	10	1673451	1675179	-	1638	protein_coding	NA && sp|Q8VZG2|HSR4_ARATH Protein HYPER-SENSITIVITY-RELATED 4 OS=Arabidopsis thaliana OX=3702 GN=HSR4 PE=2 SV=1 && PF00004:ATPase family associated with various cellular activities (AAA)|PF14363:Domain associated at C-terminal with AAA	NAC
Solyc06g050980_3	535.954775835527	490.734212248941	474.565217694415	161.689959139627	107.623238759063	157.820697323943	500.418068592961	142.377965074211	1.81165948115887	5.13176368358389e-18	1.40706635341067e-16	Solyc06g050980_3	6	34143832	34145846	+	1138	protein_coding	NA && sp|Q8RX97|FRI1_TOBAC Ferritin-1, chloroplastic OS=Nicotiana tabacum OX=4097 GN=FER1 PE=2 SV=1 && PF00210:Ferritin-like domain	B3
Solyc01g095160_3	190.852188468261	180.796815039084	76.9212852856332	3.0798087455167	6.3307787505331	0	149.523429597659	3.13686249868327	5.62317673653416	5.16588513632988e-18	1.41444102536965e-16	Solyc01g095160_3	1	86402329	86404416	+	2088	protein_coding	NA && sp|O23169|PP353_ARATH Pentatricopeptide repeat-containing protein At4g37170 OS=Arabidopsis thaliana OX=3702 GN=PCMP-H5 PE=3 SV=1 && PF14432:DYW family of nucleic acid deaminases|PF01535:PPR repeat|PF13041:PPR repeat family	bHLH
Solyc07g006770_2	303.271970716689	265.325196096318	359.835165064996	64.6759836558507	72.8039556311306	49.4861508558127	309.477443959334	62.322030047598	2.31484302820224	6.02809996571171e-18	1.64821386911645e-16	Solyc07g006770_2	7	1617845	1621709	-	3422	protein_coding	NA && sp|Q1MX30|XA21_ORYSI Receptor kinase-like protein Xa21 OS=Oryza sativa subsp. indica OX=39946 GN=XA21 PE=1 SV=1 && PF00069:Protein kinase domain|PF08263:Leucine rich repeat N-terminal domain|PF15102:TMEM154 protein family|PF13855:Leucine rich repeat	WRKY
Solyc01g009860_3	938.574461097338	911.028106950188	732.707836110608	319.530157347358	275.38887564819	375.158522028526	860.770134719378	323.359185008024	1.41123899704547	6.45755446197813e-18	1.76317355233118e-16	Solyc01g009860_3	1	4316069	4318203	-	1154	protein_coding	NA && sp|Q9FY93|NAC83_ARATH NAC domain-containing protein 83 OS=Arabidopsis thaliana OX=3702 GN=NAC083 PE=1 SV=1 && PF02365:No apical meristem (NAM) protein	NAC
Solyc07g009040_3	54.9026843538833	89.2244022270802	33.8975155496011	282.572452401157	497.757479260665	425.31340465266	59.3415340435215	401.881112104827	-2.75327470531286	7.17007404774448e-18	1.95499358819908e-16	Solyc07g009040_3	7	4018687	4020126	-	1233	protein_coding	NA && - && -	-
Solyc05g053960_3	1478.45085724386	1751.61589635268	1219.00680918758	503.54872989198	727.248208967489	569.759466610167	1483.02452092804	600.185468489879	1.30598621292197	8.2005364449841e-18	2.2328498189632e-16	Solyc05g053960_3	5	64817900	64819768	-	994	protein_coding	NA && - && -	-
Solyc07g066260_3	734.650204925772	556.47850862679	830.489130965226	184.788524731002	265.101360178573	174.538991531988	707.205948172596	208.142958813854	1.76555560491124	9.27943328486703e-18	2.51611447947149e-16	Solyc07g066260_3	7	67874218	67878698	-	2484	protein_coding	NA && sp|Q9SA22|P2C06_ARATH Probable protein phosphatase 2C 6 OS=Arabidopsis thaliana OX=3702 GN=At1g16220 PE=2 SV=1 && PF00481:Protein phosphatase 2C	B3
Solyc06g066360_2	156.864812439667	248.889122001855	280.30637858324	15.3990437275835	25.3231150021324	34.1053201844114	228.686771008254	24.9424929713758	3.19057626127131	1.00620233395508e-17	2.72453984672734e-16	Solyc06g066360_2	6	41773340	41789100	-	3247	protein_coding	NA && - && -	WRKY
Solyc09g074520_3	117.64860932975	35.2201587738475	93.8700430604338	502.008825519222	432.075649723884	545.685122950583	82.2462703880104	493.25653273123	-2.59068033629212	1.15825632570456e-17	3.13193150391134e-16	Solyc09g074520_3	9	66755672	66759654	+	2326	protein_coding	NA && sp|Q570C0|TIR1_ARATH Protein TRANSPORT INHIBITOR RESPONSE 1 OS=Arabidopsis thaliana OX=3702 GN=TIR1 PE=1 SV=2 && PF18511:F-box|PF18791:Transport inhibitor response 1 protein domain	FAR1
Solyc06g009050_3	590.857460189411	631.614847344331	651.87529903079	225.595990609098	163.017552826227	237.399777754236	624.782535521511	208.671107063187	1.58048372903967	1.24868138981291e-17	3.37178421632654e-16	Solyc06g009050_3	6	2978198	2981630	+	1759	protein_coding	NA && - && PF00582:Universal stress protein family	-
novel.671	291.507109783714	408.553841776631	385.910177026228	65.4459358422299	98.9184179770796	76.2354215886844	361.990376195524	80.199925135998	2.17601124723041	1.26445079490657e-17	3.40497293148363e-16	-	4	6109282	6111569	+	2288	-	- && - && -	-
Solyc10g083690_3	751.643892940069	1030.77664678127	954.345437781076	333.389296702183	386.177503782519	263.480316718786	912.255325834138	327.682372401163	1.47915946841912	1.27496627460292e-17	3.42857345575567e-16	Solyc10g083690_3	10	63589342	63590944	+	1516	protein_coding	NA && sp|P37122|C76A2_SOLME Cytochrome P450 76A2 OS=Solanum melongena OX=4111 GN=CYP76A2 PE=2 SV=1 && PF00067:Cytochrome P450	MYB
Solyc10g084970_2	65.3603385165277	49.3082222833864	135.590062198404	448.882124659059	437.6150811306	535.654146425756	83.4195409994395	474.050450738472	-2.51127737652463	1.29082015674643e-17	3.46644529610765e-16	Solyc10g084970_2	10	64449134	64451175	+	1442	protein_coding	NA && - && -	-
Solyc07g054790_1	139.871124425369	91.5724128120034	80.832537079818	572.844426666106	374.307293625269	458.74999306875	104.092024772397	468.633904453375	-2.17216283766963	1.33097452179707e-17	3.5693819470166e-16	Solyc07g054790_1	7	63112730	63113002	-	273	protein_coding	NA && - && -	Nin-like
Solyc06g035490_3	315.036831649664	257.107159049086	264.661371406501	33.1079440143045	49.0635353166315	13.3746353664359	278.93512070175	31.848704899124	3.14050196617302	1.45997742896946e-17	3.90464182061956e-16	Solyc06g035490_3	6	24468359	24470013	+	1065	protein_coding	NA && sp|Q9FLI1|BH036_ARATH Transcription factor bHLH36 OS=Arabidopsis thaliana OX=3702 GN=BHLH36 PE=2 SV=1 && PF00010:Helix-loop-helix DNA-binding domain	bHLH
Solyc08g068600_3	258.82694052545	198.406894426007	346.79765908438	867.73611404933	878.395551636467	724.905236860823	268.010498011946	823.67896751554	-1.62163156741076	1.67203568224386e-17	4.4535295988147e-16	Solyc08g068600_3	8	57794832	57796816	-	1505	protein_coding	NA && sp|P54772|DCHS_SOLLC Histidine decarboxylase OS=Solanum lycopersicum OX=4081 GN=HDC PE=2 SV=1 && PF00282:Pyridoxal-dependent decarboxylase conserved domain	MYB_related
Solyc12g087950_1	347.717000907928	306.415381332473	290.736383367732	77.7651708242967	54.602966723348	76.2354215886844	314.956255202711	69.5345197121097	2.17725286206997	1.86885524397791e-17	4.97100259665157e-16	Solyc12g087950_1	12	64432737	64433537	-	801	protein_coding	NA && sp|Q9LTA2|AHL17_ARATH AT-hook motif nuclear-localized protein 17 OS=Arabidopsis thaliana OX=3702 GN=AHL17 PE=2 SV=1 && PF03479:Plants and Prokaryotes Conserved (PCC) domain	NAC
Solyc07g055200_3	185.623361386939	136.184613925544	123.85630681585	443.492459354405	549.195056608746	614.564495087727	148.554760709444	535.750670350293	-1.8519950923651	1.92959460798634e-17	5.12560022259817e-16	Solyc07g055200_3	7	63442160	63446833	+	1572	protein_coding	NA && sp|Q39010|KSG6_ARATH Shaggy-related protein kinase zeta OS=Arabidopsis thaliana OX=3702 GN=ASK6 PE=1 SV=2 && PF00069:Protein kinase domain	C3H
Solyc01g091740_3	717.656516911474	412.075857654015	503.24773085177	149.37072415756	120.284796260129	153.808306714012	544.326701805753	141.1546090439	1.9453361093714	1.95684075060578e-17	5.19093108057037e-16	Solyc01g091740_3	1	85200372	85204194	-	2188	protein_coding	NA && - && -	ERF
Solyc02g077430_3	647.067351313625	610.482752080023	534.537745205248	217.896468745307	212.081088142859	232.718655375984	597.362616199632	220.898737421383	1.4346794008248	2.2910445042039e-17	6.0692528090392e-16	Solyc02g077430_3	2	42941909	42943255	-	1280	protein_coding	NA && sp|O49523|DSEL_ARATH Phospholipase A1-IIgamma OS=Arabidopsis thaliana OX=3702 GN=DSEL PE=1 SV=1 && PF01764:Lipase (class 3)	Trihelix
Solyc01g102490_3	290.199903013383	335.765513644013	254.231366622008	67.7557924013674	55.3943140671646	37.4489790260204	293.398927759801	53.5330284981841	2.4592588461867	2.39964961937058e-17	6.34837035113756e-16	Solyc01g102490_3	1	91154857	91167041	+	4200	protein_coding	NA && sp|Q8W3L1|MFDR_ARATH NADPH:adrenodoxin oxidoreductase, mitochondrial OS=Arabidopsis thaliana OX=3702 GN=MFDR PE=1 SV=1 && PF07992:Pyridine nucleotide-disulphide oxidoreductase	-
Solyc04g078690_3	341.180967056275	385.073735927399	312.900143534779	84.6947405017092	51.4375773480814	32.099124879446	346.384948839484	56.0771475764122	2.63205642345088	2.74985250176996e-17	7.25523752387473e-16	Solyc04g078690_3	4	63471109	63476007	+	1489	protein_coding	NA && sp|Q9FUA4|SPT_ARATH Transcription factor SPATULA OS=Arabidopsis thaliana OX=3702 GN=SPT PE=1 SV=1 && PF00010:Helix-loop-helix DNA-binding domain	bHLH
Solyc08g036660_3	529.418741983875	513.040312805711	518.892738028509	5.38966530465422	25.3231150021324	6.68731768321793	520.450597606032	12.4666993300015	5.39195029617964	2.8902404273519e-17	7.61537508025143e-16	Solyc08g036660_3	8	10494205	10495853	+	613	protein_coding	NA && - && PF06200:tify domain|PF09425:Divergent CCT motif	-
Solyc04g049150_2	168.629673372642	180.796815039084	230.7638558569	16.9389481003419	18.9923362515993	30.7616613428025	193.396781422875	22.2309818982479	3.11248376292198	3.28059386923482e-17	8.63228308844222e-16	Solyc04g049150_2	4	39843281	39847044	+	691	protein_coding	NA && - && -	-
Solyc03g093550_1	36.6017895692555	63.3962857929254	80.832537079818	277.182787096503	428.118913004801	348.409251295654	60.2768708139996	351.236983798986	-2.54177031442124	3.30773784494544e-17	8.69202466986536e-16	Solyc03g093550_1	3	56355720	56356445	-	726	protein_coding	NA && sp|Q40478|ERF5_TOBAC Ethylene-responsive transcription factor 5 OS=Nicotiana tabacum OX=4097 GN=ERF5 PE=2 SV=1 && PF00847:AP2 domain	ERF
Solyc02g071285_1	236.60442542983	234.801058492316	265.965122004562	34.6478483870629	45.8981459413649	52.1610779290998	245.79020197557	44.2356907525092	2.4711203643227	3.33823008621646e-17	8.76039281472648e-16	Solyc02g071285_1	2	41349200	41352965	+	1276	protein_coding	NA && sp|P49211|RL321_ARATH 60S ribosomal protein L32-1 OS=Arabidopsis thaliana OX=3702 GN=RPL32A PE=2 SV=2 && -	-
Solyc02g080920_2	249.676493133136	376.855698880168	324.633898917333	0	0	0.668731768321793	317.055363643546	0.222910589440598	10.2218580913883	3.41389339534932e-17	8.94695997332712e-16	Solyc02g080920_2	2	45573595	45573993	-	399	protein_coding	NA && - && PF04885:Stigma-specific protein, Stig1	-
Solyc02g081890_3	470.594437319	678.575059042794	554.094004176171	1412.86226200579	1418.09444011941	1138.85020145201	567.754500179322	1323.26896785907	-1.21898206607943	3.46748292204749e-17	9.07525577071173e-16	Solyc02g081890_3	2	46214113	46220943	-	2540	protein_coding	NA && sp|Q9FLD7|GT14A_ARATH Beta-glucuronosyltransferase GlcAT14A OS=Arabidopsis thaliana OX=3702 GN=GLCAT14A PE=2 SV=1 && PF03473:MOSC domain|PF03476:MOSC N-terminal beta barrel domain|PF02485:Core-2/I-Branching enzyme	Dof
Solyc09g082550_3	168.629673372642	208.972942058162	170.791328346067	0	0	0	182.797981258957	0	10.3890488537397	3.49965562616527e-17	9.14723073343626e-16	Solyc09g082550_3	9	68691601	68697487	-	2340	protein_coding	NA && sp|Q9SV13|SUT31_ARATH Sulfate transporter 3.1 OS=Arabidopsis thaliana OX=3702 GN=SULTR3;1 PE=2 SV=1 && PF01740:STAS domain|PF00916:Sulfate permease family	MIKC_MADS
Solyc07g065170_3	1456.22834214824	1258.53367351882	1177.28679004961	685.257445877466	637.034611772393	577.784247830029	1297.34960190555	633.358768493296	1.03495132480464	3.63359456636229e-17	9.47202141487011e-16	Solyc07g065170_3	7	67179416	67182180	-	1399	protein_coding	NA && sp|P49199|RS8_ORYSJ 40S ribosomal protein S8 OS=Oryza sativa subsp. japonica OX=39947 GN=RPS8 PE=2 SV=2 && PF01201:Ribosomal protein S8e	bZIP
Solyc06g008260_3	992.169938680891	690.31511196741	777.035356444702	336.469105447699	265.101360178573	302.26675928145	819.840135697668	301.279074969241	1.44343035921956	4.30591967826305e-17	1.12097060560313e-15	Solyc06g008260_3	6	2133393	2136782	+	775	protein_coding	NA && sp|Q9SIM4|RL141_ARATH 60S ribosomal protein L14-1 OS=Arabidopsis thaliana OX=3702 GN=RPL14A PE=2 SV=1 && PF01929:Ribosomal protein L14	CAMTA
Solyc01g111880_3	590.857460189411	532.998402777558	707.936574747438	230.985655913752	183.59258376546	215.331629399617	610.597479238136	209.96995635961	1.5390046766973	4.61623421139137e-17	1.20015959039055e-15	Solyc01g111880_3	1	97955743	97963709	-	2355	protein_coding	NA && sp|F4JTP5|STY46_ARATH Serine/threonine-protein kinase STY46 OS=Arabidopsis thaliana OX=3702 GN=STY46 PE=1 SV=1 && PF01842:ACT domain|PF07714:Protein tyrosine kinase	bZIP
Solyc08g006850_3	1732.04897068798	1635.38937239898	1473.23817580959	3.0798087455167	17.409641563966	1.33746353664359	1613.55883963218	7.27563794870877	7.80413498512506	4.6656805478572e-17	1.21140620802918e-15	Solyc08g006850_3	8	1388439	1408950	+	2539	protein_coding	NA && sp|Q2MY43|PAT08_SOLTU Patatin-08 OS=Solanum tuberosum OX=4113 PE=2 SV=1 && PF01734:Patatin-like phospholipase	M-type_MADS
Solyc08g074390_3	26.1441354066111	39.9161799436938	36.5050167457242	212.506803440652	233.447466425908	230.712460071018	34.1884440320097	225.55557664586	-2.7185000648249	5.13387864315418e-17	1.32944367985489e-15	Solyc08g074390_3	8	58620950	58627393	-	3214	protein_coding	NA && sp|Q93Z08|E136_ARATH Glucan endo-1,3-beta-glucosidase 6 OS=Arabidopsis thaliana OX=3702 GN=At5g58090 PE=2 SV=2 && PF00332:Glycosyl hydrolases family 17|PF07983:X8 domain	LBD
Solyc01g111820_2	92.8116806934694	105.660476321542	131.67881040422	1.53990437275835	3.16538937526655	1.33746353664359	110.050322473077	2.01425242822283	5.79343263602005	5.28189257083744e-17	1.36596579734854e-15	Solyc01g111820_2	1	97895375	97895962	+	588	protein_coding	NA && - && -	-
Solyc06g076080_2	555.562877390486	552.956492749405	529.322742813001	206.347185949619	192.297404547443	211.987970558008	545.947370984297	203.544187018357	1.42289507253697	5.30131190872883e-17	1.36917919837974e-15	Solyc06g076080_2	6	47376773	47379915	-	641	protein_coding	NA && - && -	-
Solyc06g053610_3	20.9153083252889	21.1320952643085	36.5050167457242	219.436373118065	191.506057203626	216.669092936261	26.1841401117739	209.203841085984	-3.00228865920337	5.53260930332772e-17	1.42703415456188e-15	Solyc06g053610_3	6	36519369	36522613	-	1302	protein_coding	NA && sp|Q9LTC4|MYB15_ARATH Transcription factor MYB15 OS=Arabidopsis thaliana OX=3702 GN=MYB15 PE=1 SV=1 && PF00249:Myb-like DNA-binding domain	MYB
Solyc08g074750_2	262.748560836441	253.585143171702	284.217630377424	635.210553762819	744.657850531455	654.019669418713	266.850444795189	677.962691237663	-1.34550333598834	6.20490475888331e-17	1.59623417167751e-15	Solyc08g074750_2	8	59007389	59012073	-	551	protein_coding	NA && - && -	C2H2
Solyc08g061970_3	22.2225150956194	30.5241376040011	31.2900143534779	188.638285662898	191.506057203626	270.167634402004	28.0122223510328	216.770659089509	-2.95098871709817	7.17706970919315e-17	1.84148746653833e-15	Solyc08g061970_3	8	50254198	50259287	+	1451	protein_coding	NA && sp|Q9S7X6|ACL5_ARATH Thermospermine synthase ACAULIS5 OS=Arabidopsis thaliana OX=3702 GN=ACL5 PE=1 SV=1 && PF01564:Spermine/spermidine synthase domain|PF17284:Spermidine synthase tetramerisation domain	-
Solyc03g093410_3	154.250398899005	65.7442963778486	172.095078944129	552.055717633868	619.624970208427	604.533518562901	130.696591406994	592.071402135065	-2.18408236663392	7.62603197590758e-17	1.95412078524009e-15	Solyc03g093410_3	3	56123218	56131528	+	3230	protein_coding	NA && sp|Q07423|HEX6_RICCO Hexose carrier protein HEX6 OS=Ricinus communis OX=3988 GN=HEX6 PE=2 SV=1 && PF00083:Sugar (and other) transporter	ERF
Solyc10g050960_2	166.01525983198	218.364984397854	140.805064590651	0	0	0	175.061769606828	0	10.3269632333059	7.82748598159759e-17	2.00312017074165e-15	Solyc10g050960_2	10	51184351	51184703	-	295	protein_coding	NA && - && -	ERF
Solyc02g091700_3	1002.62759284354	1089.47691140435	1607.52448740993	471.980690250434	399.630408627402	522.27951105932	1233.20966388594	464.630203312385	1.40721330616147	8.76391331785621e-17	2.23983199769805e-15	Solyc02g091700_3	2	53573900	53576603	-	1078	protein_coding	NA && sp|Q9LSK9|Y5566_ARATH Uncharacterized protein At5g65660 OS=Arabidopsis thaliana OX=3702 GN=At5g65660 PE=2 SV=1 && -	-
Solyc10g006560_3	394.776444639828	475.472143446941	486.298973076969	153.220485089456	89.42224985128	94.9599111016945	452.182520387913	112.534215347477	2.00786282681448	9.26425439547253e-17	2.36461940417426e-15	Solyc10g006560_3	10	1112151	1113245	-	360	protein_coding	NA && sp|Q9C681|H2A1_ARATH Probable histone H2A.1 OS=Arabidopsis thaliana OX=3702 GN=At1g51060 PE=1 SV=1 && PF16211:C-terminus of histone H2A	GeBP
Solyc12g010570_1	64.0531317461972	16.4360740944621	33.8975155496011	322.609966092874	273.01483361674	310.960272269634	38.1289071300868	302.195023993083	-2.99560390350496	9.55128759057833e-17	2.43470777553063e-15	Solyc12g010570_1	12	3547599	3549881	+	813	protein_coding	NA && sp|Q9SUD4|TET7_ARATH Tetraspanin-7 OS=Arabidopsis thaliana OX=3702 GN=TET7 PE=2 SV=1 && PF00335:Tetraspanin family	-
Solyc11g010390_1	389.547617558505	336.939518936474	316.811395328964	977.069324515173	728.039556311306	919.506181442465	347.766177274648	874.871687422981	-1.33154566855536	9.85774357232735e-17	2.50955846444021e-15	Solyc11g010390_1	11	3466388	3466807	-	420	protein_coding	NA && - && -	-
Solyc01g067390_3	431.378234209083	474.298138154479	422.415193771952	923.94262365501	954.364896642864	913.487595527569	442.697188711838	930.598371941814	-1.07093843996144	9.90500797430443e-17	2.5183161183501e-15	Solyc01g067390_3	1	75679304	75690235	+	3541	protein_coding	NA && sp|Q7G8Y3|ISW2_ORYSJ Probable chromatin-remodeling complex ATPase chain OS=Oryza sativa subsp. japonica OX=39947 GN=Os01g0367900 PE=2 SV=2 && PF00271:Helicase conserved C-terminal domain|PF09111:SLIDE|PF00176:SNF2 family N-terminal domain|PF09110:HAND	MYB_related
Solyc12g010390_2	1109.81854801064	868.763916421571	1255.5118259333	467.360977132159	440.780470505867	480.149409655047	1078.03143012184	462.763619097691	1.21899344215769	9.99724934309072e-17	2.53847147068336e-15	Solyc12g010390_2	12	3440156	3442129	-	1974	protein_coding	NA && sp|Q9FYQ8|TMN11_ARATH Transmembrane 9 superfamily member 11 OS=Arabidopsis thaliana OX=3702 GN=TMN11 PE=2 SV=1 && PF02990:Endomembrane protein 70	-
Solyc05g006050_3	22.2225150956194	44.6122011135401	23.4675107651084	213.276755627031	227.116687675375	242.749631900811	30.100742324756	227.714358401072	-2.91011838666461	1.02528537955454e-16	2.60000153828228e-15	Solyc05g006050_3	5	786227	789498	-	1974	protein_coding	NA && sp|P42751|CCD11_ARATH Cyclin-D1-1 OS=Arabidopsis thaliana OX=3702 GN=CYCD1-1 PE=1 SV=3 && PF02984:Cyclin, C-terminal domain|PF00134:Cyclin, N-terminal domain	LBD
Solyc08g062820_3	473.208850859661	501.300259881096	707.936574747438	147.830819784802	192.297404547443	163.839283238839	560.815228496065	167.989169190361	1.73927249644179	1.03242602803633e-16	2.61472242572667e-15	Solyc08g062820_3	8	52201270	52204657	-	1711	protein_coding	NA && sp|Q84MC2|LOG8_ARATH Cytokinin riboside 5'-monophosphate phosphoribohydrolase LOG8 OS=Arabidopsis thaliana OX=3702 GN=LOG8 PE=1 SV=1 && PF03641:Possible lysine decarboxylase	WRKY
Solyc08g061010_3	130.720677033055	251.237132586779	149.931318777082	0	0	0	177.296376132305	0	10.3456702075829	1.03389899561345e-16	2.61506984975769e-15	Solyc08g061010_3	8	46457009	46472636	-	2103	protein_coding	NA && sp|Q9SZY4|PTR27_ARATH Protein NRT1/ PTR FAMILY 6.2 OS=Arabidopsis thaliana OX=3702 GN=NPF6.2 PE=1 SV=1 && PF00854:POT family	C3H
Solyc03g082450_3	257.519733755119	336.939518936474	431.541447958383	86.2346448744676	66.4731768805975	64.8669815272139	342.000233549992	72.5249344274263	2.2384962917819	1.06995806694741e-16	2.69930013874091e-15	Solyc03g082450_3	3	53814277	53820025	+	5622	protein_coding	NA && sp|C0LGQ5|GSO1_ARATH LRR receptor-like serine/threonine-protein kinase GSO1 OS=Arabidopsis thaliana OX=3702 GN=GSO1 PE=1 SV=1 && -	MYB_related
Solyc09g005560_3	160.786432750658	165.534746237083	249.016364229762	27.7182787096503	12.6615575010662	20.7306848179756	191.779181072501	20.3701736762307	3.23262643762856	1.15084321221451e-16	2.89589428862768e-15	Solyc09g005560_3	9	386183	388198	-	1680	protein_coding	NA && sp|Q9SDW0|TGT3A_ARATH Trihelix transcription factor GT-3a OS=Arabidopsis thaliana OX=3702 GN=GT-3A PE=1 SV=1 && PF13837:Myb/SANT-like DNA-binding domain	Trihelix
Solyc11g071640_2	146.407158277022	214.84296852047	213.815098082099	633.670649390061	514.375773480814	740.954799300546	191.688408293197	629.66707405714	-1.71518011386196	1.19012043052806e-16	2.99088416796505e-15	Solyc11g071640_2	11	55351145	55356075	+	2785	protein_coding	NA && sp|A7LXU3|BGH3B_BACO1 Beta-glucosidase BoGH3B OS=Bacteroides ovatus (strain ATCC 8483 / DSM 1896 / JCM 5824 / NCTC 11153) OX=411476 GN=BACOVA_02659 PE=1 SV=1 && PF01915:Glycosyl hydrolase family 3 C-terminal domain|PF00933:Glycosyl hydrolase family 3 N terminal domain	C2H2
Solyc02g091710_3	10.4576541626444	11.7400529246158	7.82250358836948	178.628907239969	119.493448916312	165.176746775483	10.0067368918766	154.433034310588	-3.94342860039978	1.19417248070613e-16	2.99721982753641e-15	Solyc02g091710_3	2	53594773	53597752	+	2858	protein_coding	NA && sp|Q9LTA6|WAV3_ARATH E3 ubiquitin-protein ligase WAV3 OS=Arabidopsis thaliana OX=3702 GN=WAV3 PE=1 SV=1 && PF17123:RING-like zinc finger|PF00092:von Willebrand factor type A domain	G2-like
Solyc08g008590_3	589.55025341908	328.721481889243	528.01899221494	127.812062938943	83.0914711007469	121.709181834566	482.096909174421	110.870905291419	2.11816385216156	1.20039515551728e-16	3.00898027651238e-15	Solyc08g008590_3	8	2957697	2962642	+	911	protein_coding	NA && sp|P51423|RL40_BRARP Ubiquitin-60S ribosomal protein L40 OS=Brassica rapa subsp. pekinensis OX=51351 PE=2 SV=2 && PF01020:Ribosomal L40e family|PF00240:Ubiquitin family	MYB_related
Solyc01g108350_3	192.159395238592	124.444561000928	316.811395328964	10.7793306093084	7.91347343816637	25.4118071962281	211.138450522828	14.7015370812343	3.82774583134665	1.2276243424868e-16	3.07329945688799e-15	Solyc01g108350_3	1	95587060	95588847	+	1690	protein_coding	NA && - && -	-
Solyc01g058720_3	504.581813347594	341.63554010632	441.971452742876	92.394262365501	114.745364853412	130.40269482275	429.396268732263	112.514107347221	1.92974012200367	1.29015697850252e-16	3.22160754695713e-15	Solyc01g058720_3	1	67909933	67920333	-	1156	protein_coding	NA && sp|Q9FDX6|CP1_ARATH Calcium-binding protein CP1 OS=Arabidopsis thaliana OX=3702 GN=CP1 PE=2 SV=1 && PF13499:EF-hand domain pair	-
Solyc11g018777_1	1177.79330006783	888.722006393418	803.110368405933	367.267192902866	333.948579090621	417.288623432799	956.541891622394	372.834798475429	1.35809622952803	1.51169094859733e-16	3.76998391091593e-15	Solyc11g018777_1	11	9488879	9498673	+	996	protein_coding	NA && sp|Q02200|PERX_NICSY Lignin-forming anionic peroxidase OS=Nicotiana sylvestris OX=4096 PE=2 SV=1 && PF00141:Peroxidase	NAC
Solyc02g087850_1	164.70805306165	166.708751529545	132.982561002281	459.661455268367	561.856614109812	457.412529532106	154.799788531159	492.976866303429	-1.66980340441976	1.6539293045422e-16	4.11946234033366e-15	Solyc02g087850_1	2	50752678	50753937	+	1260	protein_coding	NA && sp|Q9LH89|Y3885_ARATH Uncharacterized protein At3g28850 OS=Arabidopsis thaliana OX=3702 GN=At3g28850 PE=4 SV=1 && PF00462:Glutaredoxin	ARF
Solyc01g073640_3	189.54498169793	173.752783284314	118.641304423604	19.2488046594794	12.6615575010662	14.7120989030794	160.646356468616	15.5408203545417	3.37042229463938	1.66560090711337e-16	4.14326162116373e-15	Solyc01g073640_3	1	80898021	80899205	+	1048	protein_coding	NA && sp|Q94K41|SDR3B_ARATH Short-chain dehydrogenase reductase 3b OS=Arabidopsis thaliana OX=3702 GN=SDR3b PE=2 SV=1 && PF13561:Enoyl-(Acyl carrier protein) reductase	NAC
Solyc03g117260_2	183.008947846278	131.488592755697	174.702580140252	0	0	0	163.066706914076	0	10.2230967380033	1.80030368551568e-16	4.47265802681986e-15	Solyc03g117260_2	3	67921596	67928527	+	4729	protein_coding	NA && sp|P0C897|Y3264_ARATH Putative UPF0481 protein At3g02645 OS=Arabidopsis thaliana OX=3702 GN=At3g02645 PE=3 SV=1 && PF01145:SPFH domain / Band 7 family	bZIP
Solyc02g078930_2	154.250398899005	187.840846793853	143.412565786774	0	0	0	161.834603826544	0	10.2133661632482	1.8424264865555e-16	4.57150612513271e-15	Solyc02g078930_2	2	44105540	44107227	-	1158	protein_coding	NA && - && PF06830:Root cap	-
Solyc01g110440_3	277.127835310078	292.327317822934	383.302675830105	72.3755055196424	81.5087764131136	72.8917627470754	317.585942987705	75.5920148932772	2.07118387180879	1.99497882474606e-16	4.94375955089286e-15	Solyc01g110440_3	1	97061065	97063230	+	2166	protein_coding	NA && sp|P49726|SPE1_SOLLC Arginine decarboxylase OS=Solanum lycopersicum OX=4081 PE=2 SV=1 && PF02784:Pyridoxal-dependent decarboxylase, pyridoxal binding domain	G2-like
Solyc10g005510_3	892.822224135769	853.50184761957	920.447922231475	447.342220286301	397.256366595952	421.301014042729	888.923997995605	421.966533641661	1.07460147446096	2.04847844509775e-16	5.06991940830323e-15	Solyc10g005510_3	10	413592	427748	-	3271	protein_coding	NA && sp|Q9SAJ6|G3PP1_ARATH Glyceraldehyde-3-phosphate dehydrogenase GAPCP1, chloroplastic OS=Arabidopsis thaliana OX=3702 GN=GAPCP1 PE=1 SV=1 && PF00044:Glyceraldehyde 3-phosphate dehydrogenase, NAD binding domain|PF00270:DEAD/DEAH box helicase|PF02800:Glyceraldehyde 3-phosphate dehydrogenase, C-terminal domain|PF00271:Helicase conserved C-terminal domain	Trihelix
Solyc03g082530_1	1108.51134124031	860.54587937434	1276.37183550229	144.751011039285	70.4299135996807	56.8422003073524	1081.80968537231	90.674374982106	3.57777441488193	2.06061762395e-16	5.09352414445319e-15	Solyc03g082530_1	3	53889170	53889538	-	369	protein_coding	NA && sp|Q9ZUZ3|SAU32_ARATH Auxin-responsive protein SAUR32 OS=Arabidopsis thaliana OX=3702 GN=SAUR32 PE=2 SV=1 && PF02519:Auxin responsive protein	ZF-HD
Solyc09g066430_3	1603.94270719559	1397.06629802928	1116.01051194071	513.55810831491	634.660569740943	662.713182406896	1372.3398390552	603.643953487583	1.18444418533176	2.30976968576368e-16	5.70218929863751e-15	Solyc09g066430_3	9	65082809	65085348	+	971	protein_coding	NA && sp|P55844|RL14_PEA Probable 60S ribosomal protein L14 OS=Pisum sativum OX=3888 PE=2 SV=1 && PF01929:Ribosomal protein L14	CAMTA
Solyc02g062375_1	397.390858180489	362.767635370629	323.330148319272	104.713497347568	102.875154696163	102.315960553234	361.162880623463	103.301537532322	1.80590992292236	2.31787206312351e-16	5.71498506042431e-15	Solyc02g062375_1	2	34523206	34526601	+	3217	protein_coding	NA && sp|Q9SIV5|C3H19_ARATH Zinc finger CCCH domain-containing protein 19 OS=Arabidopsis thaliana OX=3702 GN=NERD PE=1 SV=3 && PF02213:GYF domain	C3H
Solyc04g007630_2	181.701741075947	159.664719774775	130.375059806158	0	0	0	157.247173552293	0	10.1713657150228	2.8484322333486e-16	7.01430916129126e-15	Solyc04g007630_2	4	1308419	1309644	+	821	protein_coding	NA && sp|Q9C9A3|HIP20_ARATH Heavy metal-associated isoprenylated plant protein 20 OS=Arabidopsis thaliana OX=3702 GN=HIPP20 PE=1 SV=1 && PF00403:Heavy-metal-associated domain	MIKC_MADS
Solyc01g106060_3	405.234098802472	463.732090522325	439.363951546752	118.572636702393	85.4655131321968	41.4613696359511	436.110046957183	81.833173156847	2.41865913650972	3.14182070030184e-16	7.72706329771471e-15	Solyc01g106060_3	1	93934323	93940059	-	1175	protein_coding	NA && sp|O82225|GGP5_ARATH Gamma-glutamyl peptidase 5 OS=Arabidopsis thaliana OX=3702 GN=GGP5 PE=2 SV=1 && PF00117:Glutamine amidotransferase class-I	-
Solyc10g005020_3	26.1441354066111	25.8281164341548	23.4675107651084	162.459911326006	213.663782830492	203.963189338147	25.1465875352914	193.362294498215	-2.94242664040129	3.1487884246039e-16	7.73448318550447e-15	Solyc10g005020_3	10	21133	23640	-	2002	protein_coding	NA && - && PF14009:Domain of unknown function (DUF4228)	-
Solyc08g007805_1	584.321426337758	614.004767957407	625.800287069558	0	2.37404203144991	8.02478121986151	608.042160454908	3.46627441710381	7.42725440968013	3.20704326519746e-16	7.86770501287852e-15	Solyc08g007805_1	8	2325216	2326730	+	262	protein_coding	NA && sp|Q9SQT4|NDA8A_ARATH NADH dehydrogenase [ubiquinone] 1 alpha subcomplex subunit 8-A OS=Arabidopsis thaliana OX=3702 GN=At3g06310 PE=3 SV=1 && -	AP2
Solyc01g091690_3	151.635985358344	49.3082222833864	119.945055021665	502.778777705601	552.360445984013	540.335268804008	106.963087554465	531.824830831207	-2.31896997624955	3.37006771132875e-16	8.2572985712995e-15	Solyc01g091690_3	1	85145598	85150533	-	2783	protein_coding	NA && sp|Q9ZPH9|PMTF_ARATH Probable methyltransferase PMT15 OS=Arabidopsis thaliana OX=3702 GN=At4g00750 PE=2 SV=1 && PF03141:Putative S-adenosyl-L-methionine-dependent methyltransferase	NAC
Solyc07g043590_3	555.562877390486	463.732090522325	415.896440781644	152.450532903077	167.765636889127	141.77113488422	478.397136231485	153.995768225475	1.6361933404628	3.38056598035678e-16	8.2721119380128e-15	Solyc07g043590_3	7	57656564	57663074	+	2357	protein_coding	NA && sp|Q9SKX5|PAO2_ARATH Polyamine oxidase 2 OS=Arabidopsis thaliana OX=3702 GN=PAO2 PE=1 SV=1 && PF01593:Flavin containing amine oxidoreductase	bHLH
Solyc02g083850_3	679.747520571888	759.581424222644	629.711538863743	237.915225591165	194.671446578893	296.916905134876	689.680161219425	243.167859101645	1.50225320963927	3.38456436754776e-16	8.2721119380128e-15	Solyc02g083850_3	2	47667279	47673792	-	3464	protein_coding	NA && sp|Q9FKW4|CDPKS_ARATH Calcium-dependent protein kinase 28 OS=Arabidopsis thaliana OX=3702 GN=CPK28 PE=1 SV=1 && PF00069:Protein kinase domain|PF13499:EF-hand domain pair	NAC
Solyc07g066385_1	385.625997247514	468.428111692171	367.657668653366	135.511584802735	112.371322821962	100.978497016591	407.237259197683	116.287134880429	1.81028454537351	3.70370164844463e-16	9.04081884932674e-15	Solyc07g066385_1	7	67963535	67965380	+	718	protein_coding	NA && - && -	-
Solyc06g072700_3	22.2225150956194	32.8721481889243	41.7200191379706	199.417616272206	263.51866549094	209.981775253043	32.2715608075048	224.306019005396	-2.79630376830805	4.33358904107691e-16	1.05652145276666e-14	Solyc06g072700_3	6	44973995	44976460	-	1548	protein_coding	NA && sp|Q9C5D3|HIP7_ARATH Heavy metal-associated isoprenylated plant protein 7 OS=Arabidopsis thaliana OX=3702 GN=HIPP07 PE=1 SV=1 && PF00403:Heavy-metal-associated domain	MYB_related
Solyc04g079470_3	983.019491288577	741.97134483572	1065.16423861631	424.243654694925	333.157231746804	322.328712331104	930.051691580203	359.909866257611	1.36957554247896	4.68221121153852e-16	1.14009513542649e-14	Solyc04g079470_3	4	64032976	64039022	-	2922	protein_coding	NA && sp|Q9S7T8|SPZX_ARATH Serpin-ZX OS=Arabidopsis thaliana OX=3702 GN=At1g47710 PE=1 SV=1 && PF00079:Serpin (serine protease inhibitor)	B3
Solyc12g087940_2	20.9153083252889	2.34801058492316	10.4300047844926	127.812062938943	260.353276115674	197.944603423251	11.2311078982349	195.369980825956	-4.13985484392299	4.72644225180502e-16	1.14943552749797e-14	Solyc12g087940_2	12	64422002	64424168	-	1366	protein_coding	NA && sp|O04496|AED3_ARATH Aspartyl protease AED3 OS=Arabidopsis thaliana OX=3702 GN=AED3 PE=1 SV=1 && PF14541:Xylanase inhibitor C-terminal|PF14543:Xylanase inhibitor N-terminal	Trihelix
Solyc06g061230_3	337.259346745283	473.124132862018	650.571548432728	1418.25192731044	1288.31347573349	1207.72957358916	486.985009346676	1304.76499221103	-1.42182716434474	5.09496329529726e-16	1.23751980684906e-14	Solyc06g061230_3	6	39346841	39347676	+	719	protein_coding	NA && - && -	-
Solyc07g054270_3	115.034195789089	131.488592755697	102.996297246865	328.769583583908	564.230656141262	496.867703863092	116.50636193055	463.289314529421	-1.99012996921046	5.11759166427358e-16	1.24147573744094e-14	Solyc07g054270_3	7	62735540	62738112	-	1623	protein_coding	NA && - && PF05623:Protein of unknown function (DUF789)	C3H
Solyc09g072610_3	23.52972186595	18.7840846793853	36.5050167457242	240.225082150303	147.190605949894	343.05939714908	26.2729410970198	243.491695083092	-3.21831240317101	5.39983362457387e-16	1.30832355035003e-14	Solyc09g072610_3	9	65641425	65645256	-	2883	protein_coding	NA && sp|B5WWZ9|FAO2_LOTJA Long-chain-alcohol oxidase FAO2 OS=Lotus japonicus OX=34305 GN=FAO2 PE=2 SV=1 && PF00732:GMC oxidoreductase|PF05199:GMC oxidoreductase	-
Solyc08g005050_3	649.681764854286	1021.38460444158	705.329073551315	287.962117705811	299.129295962689	242.080900132489	792.131814282392	276.390771266996	1.5209297664425	5.48941763349869e-16	1.32838478381958e-14	Solyc08g005050_3	8	33463	35295	-	1833	protein_coding	NA && sp|A0A060KY90|MYC1_SOLLC Transcription factor MYC1 OS=Solanum lycopersicum OX=4081 GN=MYC1 PE=1 SV=1 && PF00010:Helix-loop-helix DNA-binding domain|PF14215:bHLH-MYC and R2R3-MYB transcription factors N-terminal	bHLH
Solyc01g107810_3	1324.20045834485	1294.92783758513	1464.11192162315	693.726919927637	540.490235826763	738.948603995581	1361.08007251771	657.72191991666	1.04803873095889	5.87426131769839e-16	1.41800756863849e-14	Solyc01g107810_3	1	95122572	95128641	-	2856	protein_coding	NA && sp|Q9AT54|SCGT_TOBAC Scopoletin glucosyltransferase OS=Nicotiana tabacum OX=4097 GN=TOGT1 PE=1 SV=1 && PF00201:UDP-glucoronosyl and UDP-glucosyl transferase	ERF
Solyc05g041200_3	552.948463849825	723.187260156335	926.966675221783	244.074843082198	270.64079158529	197.944603423251	734.367466409314	237.553412696913	1.62957230336927	6.19762778695279e-16	1.4942236352854e-14	Solyc05g041200_3	5	51104563	51109046	-	1697	protein_coding	NA && sp|O23920|HPPD_DAUCA 4-hydroxyphenylpyruvate dioxygenase OS=Daucus carota OX=4039 PE=2 SV=1 && -	G2-like
Solyc09g008200_3	202.617049401236	293.501323115396	434.148949154506	886.21496652243	1115.00840743764	956.286428700163	310.089107223713	985.836600886745	-1.66884505506796	6.26325356763899e-16	1.5081883775359e-14	Solyc09g008200_3	9	1653017	1655519	-	1582	protein_coding	NA && sp|Q9SJL2|HIP5_ARATH Heavy metal-associated isoprenylated plant protein 5 OS=Arabidopsis thaliana OX=3702 GN=HIPP05 PE=1 SV=2 && PF00403:Heavy-metal-associated domain	NAC
Solyc12g009510_2	1196.09419485246	1487.46470554882	1503.224439565	120.112541075151	66.4731768805975	193.93221281332	1395.59444665543	126.839310256356	3.45803061467563	6.29170935623736e-16	1.51317928829311e-14	Solyc12g009510_2	12	2768304	2779537	-	7210	protein_coding	NA && sp|Q9C637|RLP6_ARATH Receptor-like protein 6 OS=Arabidopsis thaliana OX=3702 GN=RLP6 PE=3 SV=1 && PF13855:Leucine rich repeat|PF08263:Leucine rich repeat N-terminal domain	GATA
Solyc03g078360_2	107.190955167105	122.096550416005	138.197563394527	408.844610967342	406.752534721751	395.889206846501	122.495022992546	403.828784178532	-1.72093112040206	6.79199933506245e-16	1.6294971934132e-14	Solyc03g078360_2	3	52147214	52153386	+	5460	protein_coding	NA && sp|A2XQD3|LERK2_ORYSI G-type lectin S-receptor-like serine/threonine-protein kinase LECRK2 OS=Oryza sativa subsp. indica OX=39946 GN=LECRK2 PE=2 SV=1 && PF00069:Protein kinase domain|PF00954:S-locus glycoprotein domain|PF01453:D-mannose binding lectin	ERF
Solyc12g008370_2	402.619685261811	382.725725342476	391.125179418474	845.407500644334	813.505069443503	827.889929182379	392.15686334092	828.934166423405	-1.08012174633902	7.32994357838831e-16	1.75425801264191e-14	Solyc12g008370_2	12	1801170	1802966	+	1728	protein_coding	NA && sp|Q6K8D9|SKIPA_ORYSJ SNW/SKI-interacting protein A OS=Oryza sativa subsp. japonica OX=39947 GN=SKIPA PE=1 SV=1 && PF02731:SKIP/SNW domain	BBR-BPC
Solyc01g111250_3	350.331414448589	254.759148464163	365.050167457242	84.6947405017092	78.3433870378471	74.8979580520408	323.380243456665	79.3120285305324	2.02733464907477	7.85050733096996e-16	1.87654923099388e-14	Solyc01g111250_3	1	97477781	97478877	+	1018	protein_coding	NA && - && PF00388:Phosphatidylinositol-specific phospholipase C, X domain	-
Solyc06g075250_3	428.763820668422	685.619090797564	629.711538863743	80.8449795698134	180.427194390193	142.439866652542	581.364816776576	134.570680204183	2.11158336790209	8.76302744128074e-16	2.09211936851162e-14	Solyc06g075250_3	6	46833208	46836044	-	2571	protein_coding	NA && sp|Q944L3|IDD9_ARATH Zinc finger protein BALDIBIS OS=Arabidopsis thaliana OX=3702 GN=BIB PE=1 SV=1 && -	C2H2
Solyc12g099120_2	471.90164408933	421.467899993708	436.756450350629	143.981058852906	160.643510794777	151.802111409047	443.375331477889	152.14222701891	1.54298570688276	9.15592883154474e-16	2.18060363424758e-14	Solyc12g099120_2	12	67372351	67385958	+	1594	protein_coding	NA && sp|Q9FGY3|MYB78_ARATH Transcription factor MYB78 OS=Arabidopsis thaliana OX=3702 GN=MYB78 PE=1 SV=1 && PF00249:Myb-like DNA-binding domain	MYB
Solyc08g078870_2	266.670181147433	540.042434532328	338.975155496011	2129.6877475248	2058.29444126707	2189.42780948555	381.895923725257	2125.80333275914	-2.47578699751781	1.10639001940301e-15	2.63181013485452e-14	Solyc08g078870_2	8	62683148	62683588	+	327	protein_coding	NA && sp|P14009|14KD_DAUCA 14 kDa proline-rich protein DC2.15 OS=Daucus carota OX=4039 PE=2 SV=1 && PF14547:Hydrophobic seed protein	Trihelix
Solyc02g076830_1	138.563917655039	64.570291085387	41.7200191379706	532.03696078801	474.017058946166	400.570329224754	81.6180759594655	468.87478298631	-2.52423543879386	1.1517748770153e-15	2.73644378244278e-14	Solyc02g076830_1	2	42515472	42516782	-	1311	protein_coding	NA && sp|Q9ZVA2|EP1L2_ARATH EP1-like glycoprotein 2 OS=Arabidopsis thaliana OX=3702 GN=At1g78830 PE=1 SV=1 && PF01453:D-mannose binding lectin	FAR1
Solyc07g009070_3	50.9810640428916	22.3061005567701	18.2525083728621	261.01379118254	194.671446578893	284.879733305084	30.5132243241746	246.854990355506	-3.02151301452079	1.17856528376368e-15	2.79331386927863e-14	Solyc07g009070_3	7	4034536	4035012	-	303	protein_coding	NA && - && -	-
Solyc12g014620_2	2.61441354066111	0	0	384.206141003208	257.979234084224	264.81778025543	0.87147118022037	302.334385114287	-8.49073687478263	1.25737182294727e-15	2.97648950155245e-14	Solyc12g014620_2	12	5627614	5631659	-	564	protein_coding	NA && sp|P14009|14KD_DAUCA 14 kDa proline-rich protein DC2.15 OS=Daucus carota OX=4039 PE=2 SV=1 && PF14547:Hydrophobic seed protein	Trihelix
Solyc12g013530_2	30.0657557176028	73.9623334250797	99.0850454526801	311.830635483566	425.744870973351	479.480677886725	67.7043781984542	405.685394781214	-2.58216416398335	1.41633292590732e-15	3.34873788532458e-14	Solyc12g013530_2	12	4383832	4393845	+	754	protein_coding	NA && - && -	-
Solyc01g112050_3	633.995283610319	598.742699155407	468.046464704107	202.497425017723	91.7962918827299	127.727767749462	566.928149156611	140.673828216638	2.01108969332334	1.59025437370875e-15	3.75541735513826e-14	Solyc01g112050_3	1	98076814	98086302	-	5829	protein_coding	NA && sp|A0A178VBJ0|APSR1_ARATH Protein ALTERED PHOSPHATE STARVATION RESPONSE 1 OS=Arabidopsis thaliana OX=3702 GN=APSR1 PE=2 SV=1 && PF04783:Protein of unknown function (DUF630)|PF04782:Protein of unknown function (DUF632)	-
Solyc06g066800_2	758.179926791722	698.533149014641	694.899068766822	310.290731110807	210.498393455225	163.839283238839	717.204048191062	228.209469268291	1.65374332922398	1.65355454845374e-15	3.90019727651554e-14	Solyc06g066800_2	6	42103894	42105331	+	1340	protein_coding	NA && sp|Q9XIP8|CDI_ARATH Protein CDI OS=Arabidopsis thaliana OX=3702 GN=CDI PE=2 SV=1 && -	C2H2
Solyc02g082910_3	156.864812439667	97.4424392743113	108.211299639111	3.0798087455167	0	0	120.839517117696	1.02660291517223	6.92525137580447	1.66989169730893e-15	3.93399154731851e-14	Solyc02g082910_3	2	47096706	47101398	-	2105	protein_coding	NA && sp|M4IRL4|CCL2_HUMLU Isovalerate--CoA ligase CCL2 OS=Humulus lupulus OX=3486 GN=CCL2 PE=1 SV=1 && PF13193:AMP-binding enzyme C-terminal domain|PF00501:AMP-binding enzyme	C2H2
Solyc10g080610_1	249.676493133136	234.801058492316	196.866340307299	548.975908888352	637.825959116209	610.552104477797	227.11463064425	599.117990827453	-1.3990878065369	1.72953749859903e-15	4.06591786998659e-14	Solyc10g080610_1	10	61968404	61969438	+	1035	protein_coding	NA && sp|O80582|FBK46_ARATH F-box/kelch-repeat protein At2g44130 OS=Arabidopsis thaliana OX=3702 GN=At2g44130 PE=2 SV=2 && PF01344:Kelch motif|PF00646:F-box domain	bHLH
Solyc07g041750_3	951.646528800644	798.323598873876	701.41782175713	255.624125877886	371.141904250003	303.604222818094	817.129316477217	310.123417648661	1.39805743117305	1.73004524988447e-15	4.06591786998659e-14	Solyc07g041750_3	7	54201877	54214825	-	2739	protein_coding	NA && sp|Q94BY4|OFT35_ARATH O-fucosyltransferase 35 OS=Arabidopsis thaliana OX=3702 GN=OFUT35 PE=2 SV=1 && PF10250:GDP-fucose protein O-fucosyltransferase	MIKC_MADS
Solyc01g060020_3	198.695429090244	201.928910303392	138.197563394527	26.1783743368919	26.114462345949	23.4056118912627	179.607300929388	25.2328161913679	2.83351790732488	1.92791384476502e-15	4.52009213640297e-14	Solyc01g060020_3	1	69340218	69345249	-	1116	protein_coding	NA && sp|Q01413|E13B_SOLLC Glucan endo-1,3-beta-glucosidase B OS=Solanum lycopersicum OX=4081 PE=2 SV=1 && PF00332:Glycosyl hydrolases family 17	FAR1
Solyc03g005500_1	125.491849951733	135.010608633082	143.412565786774	0	0	0	134.638341457196	0	9.94739884049998	1.98822008075055e-15	4.65590723933655e-14	Solyc03g005500_1	3	383587	383976	+	390	protein_coding	NA && sp|Q9LTC6|ERF95_ARATH Ethylene-responsive transcription factor ERF095 OS=Arabidopsis thaliana OX=3702 GN=ERF095 PE=1 SV=1 && PF00847:AP2 domain	ERF
Solyc05g008100_1	18.3008947846278	42.264190528617	44.3275203340937	214.046707813411	226.325340331558	284.879733305084	34.9642018824461	241.750593816684	-2.78632405432642	2.02808854424208e-15	4.73793429959751e-14	Solyc05g008100_1	5	2521502	2521900	-	399	protein_coding	NA && - && -	-
Solyc06g006110_3	164.70805306165	84.5283810572339	178.613831934436	0	0	0	142.616755351107	0	10.029279746255	2.1244936414732e-15	4.95723623589045e-14	Solyc06g006110_3	6	1141736	1148761	+	1757	protein_coding	NA && sp|Q93Z81|CAX3_ARATH Vacuolar cation/proton exchanger 3 OS=Arabidopsis thaliana OX=3702 GN=CAX3 PE=1 SV=1 && PF01699:Sodium/calcium exchanger protein	ERF
Solyc04g079880_3	175.165707224294	288.805301945549	192.955088513114	38.4976093189587	18.2009889077827	32.099124879446	218.975365894319	29.5992410353958	2.88563430299358	2.1290041437325e-15	4.961846919268e-14	Solyc04g079880_3	4	64283081	64286957	+	2015	protein_coding	NA && sp|Q8L4Y2|LPAT4_ARATH Probable 1-acyl-sn-glycerol-3-phosphate acyltransferase 4 OS=Arabidopsis thaliana OX=3702 GN=LPAT4 PE=2 SV=1 && PF16076:Acyltransferase C-terminus|PF01553:Acyltransferase	-
Solyc01g105280_3	602.622321122386	765.451450684952	548.879001783925	235.605369032028	243.734981895524	171.864064458701	638.984257863754	217.068138462084	1.56019763546657	2.22031584599971e-15	5.16850455613988e-14	Solyc01g105280_3	1	93401882	93406248	+	1066	protein_coding	NA && sp|Q9S9Z7|P2C10_ARATH Probable protein phosphatase 2C 10 OS=Arabidopsis thaliana OX=3702 GN=At1g34750 PE=2 SV=1 && PF00481:Protein phosphatase 2C	CAMTA
Solyc01g109980_3	125.491849951733	131.488592755697	125.160057413912	404.224897849067	369.559209562369	442.031698860705	127.380166707114	405.271935424047	-1.66977230911911	2.27126921879829e-15	5.28083580717507e-14	Solyc01g109980_3	1	96704545	96716610	-	8958	protein_coding	NA && sp|Q9SIW2|CHR35_ARATH Protein CHROMATIN REMODELING 35 OS=Arabidopsis thaliana OX=3702 GN=DRD1 PE=1 SV=1 && PF07526:Associated with HOX|PF05920:Homeobox KN domain	TALE
Solyc03g007480_3	1217.00950317775	1077.73685847973	938.700430604338	514.328060501289	528.620025669514	538.329073499043	1077.81559742061	527.092386556615	1.03180960883363	2.28581826952058e-15	5.30835874998866e-14	Solyc03g007480_3	3	2052941	2056797	+	2141	protein_coding	NA && sp|P34109|MYOD_DICDI Myosin ID heavy chain OS=Dictyostelium discoideum OX=44689 GN=myoD PE=1 SV=2 && PF06017:Unconventional myosin tail, actin- and lipid-binding	-
Solyc04g007050_3	220.917944185864	151.446682727544	233.371357053023	545.896100142835	664.731768805975	588.483956123177	201.911994655477	599.703941690663	-1.57294047177855	2.35795392485842e-15	5.46939146764849e-14	Solyc04g007050_3	4	763876	769023	+	3295	protein_coding	NA && sp|Q71BH1|TM2S_SOLLC ToMV susceptible protein tm-2 OS=Solanum lycopersicum OX=4081 GN=tm-2 PE=1 SV=1 && PF18052:Rx N-terminal domain|PF00931:NB-ARC domain	C3H
Solyc03g114120_3	167.322466602311	208.972942058162	242.497611239454	612.111988171444	583.222992392861	539.666537035687	206.264339966642	578.333839199997	-1.48695829315263	2.38579850032786e-15	5.5274292592803e-14	Solyc03g114120_3	3	65630466	65631705	+	1066	protein_coding	NA && sp|Q9FYL8|NFD2_ARATH Protein NUCLEAR FUSION DEFECTIVE 2 OS=Arabidopsis thaliana OX=3702 GN=NFD2 PE=2 SV=1 && PF14622:Ribonuclease-III-like	-
Solyc11g013810_2	645.760144543294	745.493360713105	561.916507764541	229.445751540994	282.511001742539	220.681483546192	651.05667100698	244.212745609908	1.41635938465014	2.53321855345639e-15	5.86203541619571e-14	Solyc11g013810_2	11	7176907	7181577	-	3289	protein_coding	NA && sp|P17570|NIA_SOLLC Nitrate reductase [NADH] OS=Solanum lycopersicum OX=4081 GN=NIA PE=3 SV=1 && PF00174:Oxidoreductase molybdopterin binding domain|PF00970:Oxidoreductase FAD-binding domain|PF00173:Cytochrome b5-like Heme/Steroid binding domain|PF03404:Mo-co oxidoreductase dimerisation domain|PF00175:Oxidoreductase NAD-binding domain	C3H
Solyc05g005560_3	64.0531317461972	63.3962857929254	67.7950310992022	294.891687383224	318.121632214288	241.412168364167	65.0814828794416	284.808495987226	-2.12939004648232	2.82738113754165e-15	6.53502249464616e-14	Solyc05g005560_3	5	403117	410780	+	3603	protein_coding	NA && sp|Q40161|GP1_SOLLC Polygalacturonase-1 non-catalytic subunit beta OS=Solanum lycopersicum OX=4081 GN=GP1 PE=1 SV=1 && PF03181:BURP domain	-
Solyc07g045030_3	7.84324062198333	30.5241376040011	18.2525083728621	202.497425017723	216.037824861942	163.170551470517	18.8732955329489	193.901933783394	-3.34744091194162	3.03725716472322e-15	7.01183767851256e-14	Solyc07g045030_3	7	58239403	58244760	+	1868	protein_coding	NA && sp|Q9SK55|NAC42_ARATH Transcription factor JUNGBRUNNEN 1 OS=Arabidopsis thaliana OX=3702 GN=JUB1 PE=1 SV=1 && PF02365:No apical meristem (NAM) protein	NAC
Solyc04g054990_3	388.240410788175	517.736333975558	483.691471880846	170.929385376177	130.572311729745	116.359327687992	463.222738881526	139.287008264638	1.73561417491626	3.16384940591087e-15	7.29548643339425e-14	Solyc04g054990_3	4	53462680	53464555	+	855	protein_coding	NA && sp|O65660|PLAT1_ARATH PLAT domain-containing protein 1 OS=Arabidopsis thaliana OX=3702 GN=PLAT1 PE=1 SV=1 && PF01477:PLAT/LH2 domain	-
Solyc03g117950_3	556.870084160816	710.273201939257	769.212852856332	252.544317132369	244.526329239341	288.892123915014	678.785379652135	261.987590095575	1.37270510459456	3.6923095164685e-15	8.49404740351396e-14	Solyc03g117950_3	3	68408218	68414680	-	3244	protein_coding	NA && sp|P42762|CLPD_ARATH Chaperone protein ClpD, chloroplastic OS=Arabidopsis thaliana OX=3702 GN=CLPD PE=1 SV=1 && PF10431:C-terminal, D2-small domain, of ClpB protein|PF00004:ATPase family associated with various cellular activities (AAA)|PF07724:AAA domain (Cdc48 subfamily)|PF17871:AAA lid domain|PF02861:Clp amino terminal domain, pathogenicity island component	ARF
Solyc03g118200_3	566.02053155313	528.302381607712	576.257764343218	183.248620358244	107.623238759063	201.956994033181	556.860225834687	164.276284383496	1.75861705340267	3.89844053879366e-15	8.94721810409889e-14	Solyc03g118200_3	3	68619340	68629711	-	2227	protein_coding	NA && sp|Q941L3|BON1_ARATH Protein BONZAI 1 OS=Arabidopsis thaliana OX=3702 GN=BON1 PE=1 SV=2 && PF07002:Copine|PF00168:C2 domain	ERF
Solyc09g018280_1	844.455573633538	637.484873806639	917.840421035352	293.351783010466	291.215822524522	355.765300747194	799.92695615851	313.444302094061	1.34981357206984	4.0114716559867e-15	9.19585253035734e-14	Solyc09g018280_1	9	14024426	14025757	+	1332	protein_coding	NA && sp|Q9LZW4|CIPKE_ARATH CBL-interacting serine/threonine-protein kinase 14 OS=Arabidopsis thaliana OX=3702 GN=CIPK14 PE=1 SV=1 && PF00069:Protein kinase domain|PF03822:NAF domain	YABBY
Solyc03g117040_3	363.403482151894	335.765513644013	306.381390544471	910.853436486564	713.00395677879	752.991971130338	335.183462113459	792.283121465231	-1.24096313707298	4.05893146461595e-15	9.29376623190485e-14	Solyc03g117040_3	3	67781827	67788505	-	3045	protein_coding	NA && sp|F4JH53|FDM2_ARATH Factor of DNA methylation 2 OS=Arabidopsis thaliana OX=3702 GN=FDM2 PE=1 SV=1 && PF03468:XS domain|PF03470:XS zinc finger domain|PF03469:XH domain	NAC
Solyc08g061220_3	494.12415918495	366.289651248014	453.70520812543	140.13129792101	140.068479855545	148.458452567438	438.039672852798	142.886076781331	1.61491211579979	4.08159822872593e-15	9.33474865931863e-14	Solyc08g061220_3	8	48270071	48279311	-	1817	protein_coding	NA && sp|P26981|GPA1_SOLLC Guanine nucleotide-binding protein alpha-1 subunit OS=Solanum lycopersicum OX=4081 GN=GPA1 PE=2 SV=1 && PF00503:G-protein alpha subunit	B3
Solyc02g080530_3	342.488173826605	513.040312805711	246.408863033639	1978.0071668081	1856.50086859383	2109.84872905526	367.312449888652	1981.45225481906	-2.43054796278469	4.19323801892262e-15	9.57888222829033e-14	Solyc02g080530_3	2	45294816	45296528	-	1404	protein_coding	NA && sp|Q9SB81|PER42_ARATH Peroxidase 42 OS=Arabidopsis thaliana OX=3702 GN=PER42 PE=1 SV=2 && PF00141:Peroxidase	NAC
Solyc07g008620_1	91.5044739231388	81.0063651798492	174.702580140252	501.238873332843	455.816070038383	472.124628435186	115.737806414413	476.393190602137	-2.0442880491208	4.24586017710394e-15	9.68778609407504e-14	EIX1	7	3569764	3572859	-	3096	protein_coding	NA && sp|Q6JN47|EIX1_SOLLC Receptor-like protein EIX1 OS=Solanum lycopersicum OX=4081 GN=EIX1 PE=2 SV=2 && PF08263:Leucine rich repeat N-terminal domain|PF13855:Leucine rich repeat	ARR-B
Solyc12g087870_2	0	0	0	223.286134049961	168.556984232944	171.195332690379	0	187.679483657761	-9.66109083466398	4.31379314515462e-15	9.8313304310468e-14	Solyc12g087870_2	12	64352291	64357634	+	1737	protein_coding	NA && sp|Q9FZ96|PUP1_ARATH Purine permease 1 OS=Arabidopsis thaliana OX=3702 GN=PUP1 PE=1 SV=1 && PF16913:Purine nucleobase transmembrane transport	STAT
Solyc10g081000_1	284.971075932061	240.671084954624	174.702580140252	690.64711118212	595.884549893928	704.174552042848	233.448247008979	663.568737706298	-1.50715592809433	4.4766263100975e-15	1.01905713107882e-13	Solyc10g081000_1	10	62313828	62314280	+	453	protein_coding	NA && - && -	bHLH
Solyc03g093610_1	546.412429998172	464.906095814787	531.930244009125	98.5538798565344	178.84449970256	167.182942080448	514.416256607361	148.193773879847	1.79440242907595	4.68487051553323e-15	1.06522311361898e-13	Solyc03g093610_1	3	56458291	56459019	+	729	protein_coding	NA && sp|Q84XB3|ERF1_SOLLC Ethylene-responsive transcription factor 1 OS=Solanum lycopersicum OX=4081 GN=ERF1 PE=2 SV=1 && PF00847:AP2 domain	ERF
Solyc01g081250_3	200.002635860575	267.673206681241	264.661371406501	652.149501863161	692.428925839557	579.790443134994	244.112404649439	641.456290279238	-1.39234228169258	4.93108857131147e-15	1.1199062756446e-13	Solyc01g081250_3	1	80365913	80372067	+	1867	protein_coding	NA && sp|Q9FQA3|GST23_MAIZE Glutathione transferase GST 23 OS=Zea mays OX=4577 PE=2 SV=1 && PF02798:Glutathione S-transferase, N-terminal domain|PF00043:Glutathione S-transferase, C-terminal domain	-
Solyc05g052280_3	162.093639520989	140.88063509539	146.020066982897	447.342220286301	536.53349910768	401.239060993076	149.664780533092	461.704926795685	-1.62534804303938	5.37701538950336e-15	1.21554076536152e-13	Solyc05g052280_3	5	63410974	63414037	-	1260	protein_coding	NA && sp|Q9FLC0|PER52_ARATH Peroxidase 52 OS=Arabidopsis thaliana OX=3702 GN=PER52 PE=2 SV=1 && PF00141:Peroxidase	NAC
Solyc03g043620_1	214.381910334211	369.811667125398	217.726349876284	53.1267008601631	49.8548826604481	49.4861508558127	267.306642445298	50.8225781254746	2.39669882140238	5.45011480803874e-15	1.2306447243019e-13	Solyc03g043620_1	3	7123460	7123801	+	342	protein_coding	NA && - && -	ERF
Solyc04g076220_3	193.466602008922	226.583021445085	172.095078944129	552.825669820248	515.167120824631	538.329073499043	197.381567466045	535.440621381307	-1.43804219757092	5.90513039439927e-15	1.3318518171792e-13	Solyc04g076220_3	4	61249700	61251192	+	1389	protein_coding	NA && sp|Q9LTA2|AHL17_ARATH AT-hook motif nuclear-localized protein 17 OS=Arabidopsis thaliana OX=3702 GN=AHL17 PE=2 SV=1 && PF03479:Plants and Prokaryotes Conserved (PCC) domain	NAC
Solyc01g103430_3	258.82694052545	407.379836484169	439.363951546752	968.599850465002	1065.15352477719	866.007639976721	368.523576185457	966.587005072972	-1.39005273010231	6.0137604220238e-15	1.35479157401565e-13	Solyc01g103430_3	1	91922387	91932323	+	2666	protein_coding	NA && sp|Q39019|KSG10_ARATH Shaggy-related protein kinase kappa OS=Arabidopsis thaliana OX=3702 GN=ASK10 PE=2 SV=2 && PF00069:Protein kinase domain	C3H
Solyc05g014390_3	270.591801458425	428.511931748477	205.99259449373	66.215888028609	50.6462300042648	38.1177107943422	301.698775900211	51.6599429424053	2.55021358305766	6.06355679435117e-15	1.36443967083923e-13	Solyc05g014390_3	5	8239341	8245699	+	5021	protein_coding	NA && sp|Q9LK64|AB3C_ARATH ABC transporter C family member 3 OS=Arabidopsis thaliana OX=3702 GN=ABCC3 PE=1 SV=1 && PF00005:ABC transporter|PF00664:ABC transporter transmembrane region	bZIP
Solyc12g098753_1	104.576541626444	192.536867963699	221.637601670469	535.116769533527	653.652905992542	641.982497588921	172.917003753537	610.250724371663	-1.81833993599748	6.07300682074417e-15	1.36499718174177e-13	Solyc12g098753_1	12	67147362	67154551	-	2535	protein_coding	NA && - && PF01190:Pollen proteins Ole e I like	-
Solyc01g103630_3	189.54498169793	122.096550416005	99.0850454526801	6.1596174910334	14.2442521886995	4.68112237825255	136.908859188872	8.36166401932847	4.04790546180517	6.31130332564847e-15	1.41530796341604e-13	Solyc01g103630_3	1	92066472	92067203	-	618	protein_coding	NA && - && -	NAC
Solyc07g009260_3	69.2819588275194	11.7400529246158	13.0375059806158	2466.1568529725	2165.91768002614	2083.09945832238	31.3531725775837	2238.39133044034	-6.16050275417185	6.35083284274433e-15	1.42254295837993e-13	Solyc07g009260_3	7	4313921	4315522	-	464	protein_coding	NA && sp|P82787|DEF19_ARATH Defensin-like protein 19 OS=Arabidopsis thaliana OX=3702 GN=PDF1.4 PE=3 SV=2 && -	-
Solyc06g072018_1	666.675452868583	601.09070974033	634.926541255989	270.25321741909	288.841780493073	259.467926108856	634.230901288301	272.854308007006	1.21718271265782	7.13703274631548e-15	1.59499646203902e-13	Solyc06g072018_1	6	44533390	44533823	+	324	protein_coding	NA && sp|P0DI74|S61G1_ARATH Protein transport protein Sec61 subunit gamma-1 OS=Arabidopsis thaliana OX=3702 GN=SEC61G1 PE=1 SV=1 && -	C2H2
Solyc04g063210_3	37.9089963395861	14.088063509539	22.1637601670469	170.929385376177	246.900371270791	196.607139886607	24.720273338724	204.812298844525	-3.05876646594009	7.63743058608197e-15	1.70488002946097e-13	Solyc04g063210_3	4	55359681	55363040	-	2580	protein_coding	NA && sp|Q9C5D7|CAMT3_ARATH Probable caffeoyl-CoA O-methyltransferase At4g26220 OS=Arabidopsis thaliana OX=3702 GN=At4g26220 PE=2 SV=1 && PF01596:O-methyltransferase	ERF
Solyc08g065430_3	158.172019209997	110.356497491389	168.183827149944	12.3192349820668	15.8269468763327	17.3870259763666	145.570781283777	15.177735944922	3.25765550814614	7.71616627923179e-15	1.72049416000593e-13	Solyc08g065430_3	8	53501858	53507696	-	1298	protein_coding	NA && sp|Q9ASU8|NDL2_ARATH Protein NDL2 OS=Arabidopsis thaliana OX=3702 GN=NDL2 PE=1 SV=1 && PF03096:Ndr family	-
Solyc10g007960_1	371.246722773878	402.683815314323	385.910177026228	93.9341667382593	64.8904821929642	129.065231286106	386.613571704809	95.9632934057765	2.00631302238768	7.92831281566915e-15	1.76578589297332e-13	AOS3	10	2110666	2112141	-	1476	protein_coding	NA && sp|Q8GZP5|AOS3_SOLLC Allene oxide synthase 3 OS=Solanum lycopersicum OX=4081 GN=AOS3 PE=1 SV=1 && PF00067:Cytochrome P450	C3H
Solyc09g008780_3	138.563917655039	159.664719774775	235.978858249146	0	0	1.33746353664359	178.06916522632	0.445821178881195	8.50615076513994	8.18976208067133e-15	1.81987482693874e-13	Solyc09g008780_3	9	2206586	2211433	+	2405	protein_coding	NA && sp|Q8S9J0|TAUE4_ARATH Sulfite exporter TauE/SafE family protein 4 OS=Arabidopsis thaliana OX=3702 GN=At2g36630 PE=2 SV=1 && PF01925:Sulfite exporter TauE/SafE	C2H2
novel.721	139.871124425369	95.0944286893882	118.641304423604	9.2394262365501	9.49616812579964	6.68731768321793	117.868952512787	8.47430401518922	3.80372763157528	9.15286520390068e-15	2.02928246995202e-13	-	4	1754286	1757317	-	594	-	- && - && -	WRKY
Solyc02g077240_3	547.719636768502	449.644027012786	503.24773085177	966.289993905865	992.349569146063	1200.37352413762	500.203798211019	1053.00436239652	-1.0753467443616	9.25667693826343e-15	2.04997697308126e-13	Solyc02g077240_3	2	42807941	42811007	+	2165	nontranslating_CDS	NA && sp|P51850|PDC1_PEA Pyruvate decarboxylase 1 OS=Pisum sativum OX=3888 GN=PDC1 PE=2 SV=1 && PF00205:Thiamine pyrophosphate enzyme, central domain|PF02776:Thiamine pyrophosphate enzyme, N-terminal TPP binding domain|PF02775:Thiamine pyrophosphate enzyme, C-terminal TPP binding domain	NF-YC
Solyc02g091840_3	274.513421769416	270.021217266164	226.852604062715	687.567302436603	899.761929919516	573.103125451776	257.129081032765	720.144119269299	-1.48466786169556	9.34482597935963e-15	2.06715997963755e-13	Solyc02g091840_3	2	53708223	53728596	+	3884	protein_coding	NA && sp|O49545|BAME1_ARATH Leucine-rich repeat receptor-like serine/threonine-protein kinase BAM1 OS=Arabidopsis thaliana OX=3702 GN=BAM1 PE=1 SV=1 && PF08263:Leucine rich repeat N-terminal domain|PF13855:Leucine rich repeat|PF00069:Protein kinase domain	Trihelix
Solyc06g005230_2	481.052091481644	475.472143446941	440.667702144814	183.248620358244	170.139678920577	145.114793725829	465.730645691133	166.167697668217	1.48838030174137	9.35586042338753e-15	2.06726500574106e-13	Solyc06g005230_2	6	247456	249951	-	2496	protein_coding	NA && sp|Q9LX66|HERK_ARATH Receptor-like protein kinase HERK 1 OS=Arabidopsis thaliana OX=3702 GN=HERK1 PE=1 SV=1 && PF07714:Protein tyrosine kinase|PF12819:Malectin-like domain	ERF
Solyc04g074100_3	428.763820668422	521.258349852943	581.472766735465	167.079624444281	186.757973140726	191.257285740033	510.498312418943	181.69829444168	1.49002105700114	1.05097911033218e-14	2.31961871961366e-13	Solyc04g074100_3	4	60200644	60202415	+	932	protein_coding	NA && sp|Q56XJ7|Y4276_ARATH Uncharacterized protein At4g22758 OS=Arabidopsis thaliana OX=3702 GN=At4g22758 PE=2 SV=1 && -	FAR1
Solyc01g109890_3	498.045779495941	321.677450134474	475.868968292477	85.4646926880884	140.859827199361	111.009473541418	431.864065974297	112.444664476289	1.94110051108764	1.09261877523753e-14	2.4088060543722e-13	Solyc01g109890_3	1	96649709	96655945	+	2466	protein_coding	NA && sp|Q8GYX8|DNJ10_ARATH Chaperone protein dnaJ 10 OS=Arabidopsis thaliana OX=3702 GN=ATJ10 PE=2 SV=2 && PF14308:X-domain of DnaJ-containing|PF00226:DnaJ domain	NAC
Solyc10g081120_2	275.820628539747	390.943762389707	288.128882171609	700.656489605049	930.624476328365	817.190220889231	318.297757700354	816.157062274215	-1.35646672309573	1.09855483144337e-14	2.4191684966442e-13	Solyc10g081120_2	10	62385767	62396473	-	2834	protein_coding	NA && sp|Q9SG80|ASD1_ARATH Alpha-L-arabinofuranosidase 1 OS=Arabidopsis thaliana OX=3702 GN=ASD1 PE=1 SV=1 && PF06964:Alpha-L-arabinofuranosidase C-terminal domain	GRAS
Solyc09g065850_3	134.642297344047	138.532624510467	89.958791266249	0	0	0	121.044571040254	0	9.7942792272218	1.10947391657763e-14	2.4404686364989e-13	Solyc09g065850_3	9	64345820	64349696	-	3696	protein_coding	NA && sp|O24542|AX22D_VIGRR Auxin-induced protein 22D OS=Vigna radiata var. radiata OX=3916 GN=AUX22D PE=2 SV=1 && PF02309:AUX/IAA family	ARF
Solyc04g016470_3	1104.58972092932	813.585667675876	748.352843287347	1.53990437275835	0	8.02478121986151	888.842743964181	3.18822853087329	8.09446290486345	1.2266914155918e-14	2.69225760572206e-13	Solyc04g016470_3	4	7303620	7305238	+	1216	protein_coding	NA && sp|P36401|E13H_TOBAC Glucan endo-1,3-beta-glucosidase, acidic isoform PR-Q' OS=Nicotiana tabacum OX=4097 PE=1 SV=1 && PF00332:Glycosyl hydrolases family 17	FAR1
novel.1305	1134.65547664692	895.766038148187	923.055423427599	408.074658780963	512.001731449364	382.514571480065	984.492312740902	434.196987236797	1.18170195135042	1.23350808837773e-14	2.70418676888811e-13	-	SL3.00SC0000379	821	4072	-	1183	-	- && sp|Q9SQ56|RGGA_TOBAC RGG repeats nuclear RNA binding protein A (Fragment) OS=Nicotiana tabacum OX=4097 GN=RggA PE=2 SV=1 && -	ERF
Solyc02g069190_3	0	0	0	171.699337562556	240.569592520258	121.709181834566	0	177.99270397246	-9.58391606450904	1.35455344830305e-14	2.96291540306467e-13	Solyc02g069190_3	2	39722725	39724911	+	1053	protein_coding	NA && sp|Q8W245|ZIP10_ARATH Probable zinc transporter 10 OS=Arabidopsis thaliana OX=3702 GN=ZIP10 PE=1 SV=2 && PF02535:ZIP Zinc transporter	NF-YC
Solyc04g074780_3	539.876396146519	564.696545674021	762.694099866024	220.206325304444	117.910754228679	204.631921106469	622.422347228855	180.91633354653	1.78094479784235	1.43198457048674e-14	3.12879039468962e-13	Solyc04g074780_3	4	60782047	60786717	-	1025	protein_coding	NA && - && -	-
Solyc05g052670_1	104.576541626444	143.228645680313	104.300047844926	0	0	0	117.368411717228	0	9.75005947441565	1.50199961015726e-14	3.27810996299317e-13	Solyc05g052670_1	5	63732323	63733708	-	1386	protein_coding	NA && sp|Q9FF86|DCR_ARATH BAHD acyltransferase DCR OS=Arabidopsis thaliana OX=3702 GN=DCR PE=2 SV=1 && PF02458:Transferase family	NAC
Solyc09g008670_3	112.419782248428	122.096550416005	108.211299639111	0	0	0	114.242544101181	0	9.71062588854721	1.83081248169921e-14	3.99129353610528e-13	TD2	9	2123903	2127996	+	2078	protein_coding	NA && sp|P25306|TD2_SOLLC Threonine dehydratase 2 biosynthetic, chloroplastic OS=Solanum lycopersicum OX=4081 GN=TD2 PE=1 SV=1 && PF00291:Pyridoxal-phosphate dependent enzyme|PF00585:C-terminal regulatory domain of Threonine dehydratase	Trihelix
Solyc02g083670_3	47.0594437319	7.04403175476949	36.5050167457242	201.727472831344	322.078368933371	327.009834709357	30.2028307441312	283.605225491357	-3.24240438605179	1.84835942684357e-14	4.02059249992407e-13	Solyc02g083670_3	2	47536485	47542759	-	4728	protein_coding	NA && sp|Q9SXL4|AHK1_ARATH Histidine kinase 1 OS=Arabidopsis thaliana OX=3702 GN=AHK1 PE=1 SV=2 && PF13639:Ring finger domain	Trihelix
novel.1131	132.027883803386	165.534746237083	263.357620808439	26.1783743368919	25.3231150021324	13.3746353664359	186.973416949636	21.6253749018201	3.11888744441285	1.88815582925115e-14	4.10260007427855e-13	-	8	33929385	33932231	-	2847	-	- && - && -	-
Solyc08g080010_2	160.786432750658	207.7989367657	161.665074159636	4.61971311827505	22.1577256268658	20.7306848179756	176.750147891998	15.8360411877055	3.47669975184676	2.10820595309517e-14	4.57564833079204e-13	Solyc08g080010_2	8	63490438	63498111	+	4794	protein_coding	NA && sp|A0A0M3R8G2|SBT_PETHY Subtilisin-like protease OS=Petunia hybrida OX=4102 GN=SBT PE=2 SV=1 && PF02225:PA domain|PF00082:Subtilase family|PF05922:Peptidase inhibitor I9|PF17766:Fibronectin type-III domain	Trihelix
Solyc01g016470_3	419.613373276108	331.069492474166	367.657668653366	121.65244544791	96.5443759456297	121.709181834566	372.780178134547	113.302001076035	1.71640039584211	2.19877467600299e-14	4.76693375770882e-13	Solyc01g016470_3	1	20052680	20053774	-	822	protein_coding	NA && sp|Q8LEQ0|RLA13_ARATH 60S acidic ribosomal protein P1-3 OS=Arabidopsis thaliana OX=3702 GN=RPP1C PE=1 SV=2 && PF00428:60s Acidic ribosomal protein	-
Solyc02g083250_3	22.2225150956194	72.7883281326181	78.2250358836948	367.267192902866	293.589864555972	381.845839711744	57.7452930373108	347.567632390194	-2.58652459449611	2.2090291266432e-14	4.78386761197943e-13	Solyc02g083250_3	2	47261666	47262971	-	1072	protein_coding	NA && - && PF13716:Divergent CRAL/TRIO domain	-
Solyc08g067770_3	585.628633108088	656.268958486024	495.4252272634	220.206325304444	166.97428954531	233.387387144306	579.107606285838	206.856000664687	1.48431937759202	2.21166540376271e-14	4.78428437673619e-13	Solyc08g067770_3	8	56856543	56864510	+	2336	protein_coding	NA && sp|Q9LN71|RING1_ARATH E3 ubiquitin-protein ligase At1g12760 OS=Arabidopsis thaliana OX=3702 GN=At1g12760 PE=1 SV=1 && PF13639:Ring finger domain	G2-like
Solyc03g063480_2	299.350350405697	258.281164341548	242.497611239454	74.68536207878	49.0635353166315	60.1858591489613	266.709708662233	61.3115855147909	2.12057596474875	2.2305179126547e-14	4.81974052715685e-13	Solyc03g063480_2	3	36815674	36817337	-	732	protein_coding	NA && - && -	-
Solyc09g007520_3	709.813276289491	610.482752080023	505.855232047893	1093.33210465843	1501.18591122016	1396.98066402422	608.717086805802	1330.4995599676	-1.12818970371639	2.39545703578851e-14	5.1704368676551e-13	Solyc09g007520_3	9	1092996	1099542	-	1513	protein_coding	NA && sp|Q42580|PER21_ARATH Peroxidase 21 OS=Arabidopsis thaliana OX=3702 GN=PER21 PE=1 SV=1 && PF00141:Peroxidase	NAC
Solyc12g017460_1	793.474509590647	831.1957470628	457.616459919615	64.6759836558507	25.3231150021324	68.2106403688229	694.09557219102	52.736579675602	3.71626336917934	2.41829590045713e-14	5.21398445410235e-13	Solyc12g017460_1	12	6720607	6721716	-	1110	protein_coding	NA && sp|Q3MKY2|AAE_RAUSE Acetylajmalan esterase OS=Rauvolfia serpentina OX=4060 GN=AAE PE=1 SV=1 && PF00657:GDSL-like Lipase/Acylhydrolase	B3
Solyc01g111910_3	54.9026843538833	54.0042434532328	39.1125179418474	284.882308960295	266.684054866207	199.282066959894	49.3398152496545	250.282810262132	-2.34051300861459	2.64939411257874e-14	5.70596133574851e-13	Solyc01g111910_3	1	97981818	97992534	-	5074	protein_coding	NA && sp|Q8GYU3|IYO_ARATH Transcriptional elongation regulator MINIYO OS=Arabidopsis thaliana OX=3702 GN=IYO PE=1 SV=1 && PF08621:RPAP1-like, N-terminal|PF08620:RPAP1-like, C-terminal	-
Solyc01g086870_3	766.023167413705	909.854101657726	621.889035275374	274.102978350986	337.905315809704	216.000361167939	765.922101448935	276.002885109543	1.47478936223021	2.88089258543095e-14	6.19771803791008e-13	Solyc01g086870_3	1	81673164	81675494	-	1638	protein_coding	NA && sp|Q66GR3|BH130_ARATH Transcription factor bHLH130 OS=Arabidopsis thaliana OX=3702 GN=BHLH130 PE=1 SV=1 && PF00010:Helix-loop-helix DNA-binding domain	bHLH
Solyc06g060120_3	258.82694052545	261.803180218933	341.582656692134	682.177637131949	743.866503187639	656.694596492	287.404259145506	694.246245603863	-1.27296931167059	2.95819895321512e-14	6.35704290966987e-13	Solyc06g060120_3	6	38167912	38186514	-	3164	protein_coding	NA && sp|Q9XI07|SWI3C_ARATH SWI/SNF complex subunit SWI3C OS=Arabidopsis thaliana OX=3702 GN=SWI3C PE=1 SV=1 && PF16495:SWIRM-associated region 1|PF00249:Myb-like DNA-binding domain|PF04433:SWIRM domain	MYB_related
Solyc12g088450_2	830.076299159902	720.839249571411	717.062828933869	371.886906021141	267.475402210023	316.310126416208	755.992792555061	318.557478215791	1.24640098404032	2.99453357963568e-14	6.42806840882979e-13	Solyc12g088450_2	12	64794659	64804003	+	2780	protein_coding	NA && - && PF09177:Syntaxin 6, N-terminal	-
Solyc09g082210_3	277.127835310078	302.893365455088	204.688843895668	571.304522293348	834.871447726552	803.146853754473	261.570014886945	736.440941258124	-1.49227076295859	2.99887953197193e-14	6.43034661526994e-13	Solyc09g082210_3	9	68433713	68447990	-	3632	protein_coding	NA && sp|Q9SKZ5|FBT1_ARATH Folate-biopterin transporter 1, chloroplastic OS=Arabidopsis thaliana OX=3702 GN=At2g32040 PE=1 SV=2 && PF03092:BT1 family|PF04570:zinc-finger of the FCS-type, C2-C2	-
Solyc04g071780_3	158.172019209997	165.534746237083	102.996297246865	509.708347383014	491.426700510132	403.913988066363	142.234354231315	468.349678653169	-1.71709731426556	3.0904482793856e-14	6.61944266581311e-13	Solyc04g071780_3	4	58862146	58874921	+	2982	protein_coding	NA && sp|A0A1D6F9Y9|C92C6_MAIZE Trimethyltridecatetraene synthase OS=Zea mays OX=4577 GN=CYP92C6 PE=1 SV=1 && PF00067:Cytochrome P450	E2F/DP
Solyc02g083500_3	31.3729624879333	21.1320952643085	20.8600095689853	196.33780752669	192.297404547443	149.12718433576	24.455022440409	179.254132136631	-2.87609394601679	3.36113218197854e-14	7.19135352203211e-13	Solyc02g083500_3	2	47427386	47434232	+	2299	protein_coding	NA && sp|Q43872|PER64_ARATH Peroxidase 64 OS=Arabidopsis thaliana OX=3702 GN=PER64 PE=1 SV=1 && PF00141:Peroxidase	NAC
Solyc01g005160_3	184.316154616608	179.622809746622	200.777592101483	40.0375136917171	22.9490729706825	18.7244895130102	188.238852154905	27.2370253918033	2.79348115146642	3.52533784816216e-14	7.52623108543845e-13	Solyc01g005160_3	1	137971	139251	+	1281	protein_coding	NA && sp|Q5PNY6|PUB21_ARATH U-box domain-containing protein 21 OS=Arabidopsis thaliana OX=3702 GN=PUB21 PE=2 SV=1 && PF04564:U-box domain	Dof
Solyc08g013930_3	75.8179926791722	169.056762114468	113.426302031357	4.61971311827505	9.49616812579964	2.00619530496538	119.433685608332	5.37402551634669	4.49845911841119	3.67629277339644e-14	7.83995464322246e-13	Solyc08g013930_3	8	3397199	3402140	-	1215	protein_coding	NA && sp|Q9FLV5|PER61_ARATH Probable peroxidase 61 OS=Arabidopsis thaliana OX=3702 GN=PER61 PE=3 SV=1 && PF00141:Peroxidase	NAC
Solyc12g098330_2	887.593397054447	882.85197993111	830.489130965226	402.684993476308	460.564154101283	344.396860685723	866.978169316928	402.548669421105	1.10827405401692	3.86406344214602e-14	8.23142219879136e-13	Solyc12g098330_2	12	66859688	66862282	+	968	protein_coding	NA && sp|Q9FKC0|R13A4_ARATH 60S ribosomal protein L13a-4 OS=Arabidopsis thaliana OX=3702 GN=RPL13AD PE=2 SV=1 && PF00572:Ribosomal protein L13	bHLH
Solyc07g042230_1	104.576541626444	183.144825624007	125.160057413912	4.61971311827505	7.91347343816637	16.049562439723	137.627141554788	9.52758299872148	3.83670567587527	3.88334509365359e-14	8.2635050976583e-13	Solyc07g042230_1	7	55412937	55413440	-	504	protein_coding	NA && sp|Q9C591|ERF16_ARATH Ethylene-responsive transcription factor ERF016 OS=Arabidopsis thaliana OX=3702 GN=ERF016 PE=2 SV=1 && PF00847:AP2 domain	ERF
novel.1125	73.2035791385111	132.662598048159	130.375059806158	0	0	0	112.080412330943	0	9.68340019529362	4.00423828466545e-14	8.51150628652502e-13	-	8	22510295	22512413	-	671	-	- && - && -	-
Solyc09g056385_1	245.754872822144	299.371349577703	417.200191379706	75.4553142651591	18.9923362515993	29.4241978061589	320.775471259851	41.2906161076391	2.95935071851136	4.02924740456464e-14	8.55537705413904e-13	Solyc09g056385_1	9	49157529	49158245	-	717	protein_coding	NA && sp|Q9LSE7|B561C_ARATH Cytochrome b561 and DOMON domain-containing protein At3g25290 OS=Arabidopsis thaliana OX=3702 GN=At3g25290 PE=2 SV=1 && PF04526:Protein of unknown function (DUF568)	-
Solyc07g017600_3	240.526045740822	192.536867963699	233.371357053023	40.0375136917171	37.9846725031986	13.3746353664359	222.144756919181	30.4656071871172	2.87462424356704	4.25427519082048e-14	9.02339603582802e-13	Solyc07g017600_3	7	7612895	7618187	+	2184	protein_coding	NA && sp|Q43062|PME_PRUPE Pectinesterase/pectinesterase inhibitor PPE8B OS=Prunus persica OX=3760 PE=2 SV=1 && PF01095:Pectinesterase|PF04043:Plant invertase/pectin methylesterase inhibitor	Trihelix
Solyc04g076700_3	132.027883803386	177.274799161699	153.842570571266	398.835232544413	480.347837696699	506.898680387919	154.381751178784	462.027250209677	-1.58003470412492	4.60515778657369e-14	9.74650529597331e-13	Solyc04g076700_3	4	61665589	61681439	+	1664	protein_coding	NA && sp|Q6Z6W2|MAD57_ORYSJ MADS-box transcription factor 57 OS=Oryza sativa subsp. japonica OX=39947 GN=MADS57 PE=1 SV=2 && PF01486:K-box region|PF00319:SRF-type transcription factor (DNA-binding and dimerisation domain)	MIKC_MADS
Solyc06g071500_3	211.76749679355	218.364984397854	146.020066982897	557.445382938523	530.202720357147	522.948242827642	192.050849391434	536.86544870777	-1.48155362414134	5.69591501000176e-14	1.20290105880048e-12	Solyc06g071500_3	6	44162809	44167957	+	2968	protein_coding	NA && sp|Q9M1P7|BOR2_ARATH Probable boron transporter 2 OS=Arabidopsis thaliana OX=3702 GN=BOR2 PE=2 SV=1 && PF00955:HCO3- transporter family	M-type_MADS
Solyc12g010350_2	605.236734663047	501.300259881096	528.01899221494	218.666420931686	219.203214237208	159.158160860587	544.851995586361	199.00926534316	1.4546387852588	5.79942694445652e-14	1.22344160874596e-12	Solyc12g010350_2	12	3408460	3410478	+	1708	protein_coding	NA && sp|Q5SMI4|RL393_ORYSJ 60S ribosomal protein L39-3 OS=Oryza sativa subsp. japonica OX=39947 GN=RPL39C PE=3 SV=1 && -	-
Solyc01g079350_3	366.017895692555	478.994159324325	385.910177026228	913.163293045701	811.131027412053	961.636282846738	410.307410681036	895.310201101497	-1.12451736557168	5.920301677431e-14	1.24759683465088e-12	Solyc01g079350_3	1	78303470	78308235	+	2217	protein_coding	NA && - && PF04438:HIT zinc finger|PF04795:PAPA-1-like conserved region	GRAS
Solyc01g009870_3	441.835888371727	385.073735927399	517.588987430447	123.192349820668	42.7327565660984	111.009473541418	448.166203909858	92.311526642728	2.27672809080676	6.02075425097348e-14	1.26740113947643e-12	Solyc01g009870_3	1	4338210	4342363	-	1506	protein_coding	NA && sp|Q680A6|GDPD3_ARATH Glycerophosphodiester phosphodiesterase GDPD3 OS=Arabidopsis thaliana OX=3702 GN=GDPD3 PE=2 SV=1 && PF03009:Glycerophosphoryl diester phosphodiesterase family	-
Solyc04g072620_1	556.870084160816	602.264715032792	681.861562786206	137.821441361872	264.310012834757	183.232504520171	613.665453993271	195.121319572267	1.65397277347584	6.72345118672823e-14	1.4138024047538e-12	Solyc04g072620_1	4	59669198	59669356	-	159	protein_coding	NA && - && -	-
Solyc03g111100_1	70.58916559785	119.748539831081	132.982561002281	0	0	0	107.773422143737	0	9.6266508894891	6.80081306074526e-14	1.4285355932426e-12	Solyc03g111100_1	3	63251006	63251938	-	933	protein_coding	NA && - && -	-
Solyc08g077440_3	1041.84379595345	1068.34481614004	840.919135749719	485.839829605259	475.599753633799	504.223753314632	983.702582614404	488.554445517897	1.00983127026322	7.4576777227549e-14	1.5648334059847e-12	Solyc08g077440_3	8	61447246	61457247	-	3137	protein_coding	NA && sp|O04979|LONP2_SPIOL Lon protease homolog 2, peroxisomal OS=Spinacia oleracea OX=3562 PE=2 SV=2 && PF05362:Lon protease (S16) C-terminal proteolytic domain|PF02190:ATP-dependent protease La (LON) substrate-binding domain|PF00004:ATPase family associated with various cellular activities (AAA)	-
Solyc09g090070_2	274.513421769416	189.014852086315	247.7126136317	572.844426666106	658.400990055442	607.208445636188	237.080295829144	612.817954119245	-1.37208211451175	7.53514756685493e-14	1.57939597340813e-12	Solyc09g090070_2	9	70099051	70110842	+	3060	protein_coding	NA && sp|A7KTC5|PHT11_PETHY Low affinity inorganic phosphate transporter 1 OS=Petunia hybrida OX=4102 GN=PT1 PE=2 SV=1 && PF00083:Sugar (and other) transporter	WRKY
Solyc01g103030_3	261.441354066111	272.369227851087	134.286311600343	24.6384699641336	22.1577256268658	44.1362967092383	222.698964505847	30.3108307667459	2.87068228469166	7.73609666324671e-14	1.61978143718054e-12	Solyc01g103030_3	1	91573973	91578496	-	2059	protein_coding	NA && sp|Q93VV5|PTR16_ARATH Protein NRT1/ PTR FAMILY 4.3 OS=Arabidopsis thaliana OX=3702 GN=NPF4.3 PE=2 SV=1 && PF00854:POT family	ERF
Solyc04g057993_1	598.700700811394	677.401053750333	629.711538863743	276.412834910124	161.434858138594	238.73724129088	635.27109780849	225.528311446533	1.49343359541457	7.78083506883787e-14	1.62740820665213e-12	Solyc04g057993_1	4	55058991	55060028	+	426	protein_coding	NA && sp|P42798|R15A1_ARATH 40S ribosomal protein S15a-1 OS=Arabidopsis thaliana OX=3702 GN=RPS15AA PE=2 SV=2 && PF00410:Ribosomal protein S8	-
Solyc04g008290_3	167.322466602311	99.7904498592345	66.4912805011406	502.778777705601	517.541162856081	385.189498553353	111.201398987562	468.503146371678	-2.07555340041574	9.10697840517097e-14	1.90071765712188e-12	Solyc04g008290_3	4	1974229	1980223	+	2480	protein_coding	NA && sp|Q9SIS3|MA656_ARATH 65-kDa microtubule-associated protein 6 OS=Arabidopsis thaliana OX=3702 GN=MAP65-6 PE=1 SV=1 && PF03999:Microtubule associated protein (MAP65/ASE1 family)	LBD
Solyc07g007250_3	198.695429090244	142.054640387851	160.361323561574	28.4882308960295	25.3231150021324	16.049562439723	167.037131013223	23.2869694459616	2.84793427064033	9.12905952902559e-14	1.9032971075584e-12	Solyc07g007250_3	7	1988957	1990456	+	542	protein_coding	NA && sp|P01076|MCPI_SOLLC Metallocarboxypeptidase inhibitor OS=Solanum lycopersicum OX=4081 PE=1 SV=2 && -	-
Solyc01g101050_3	60.1315114352055	93.9204233969266	84.7437888740027	294.891687383224	285.676391117806	366.465009040342	79.5985745687116	315.677695847124	-1.98572809228188	9.28496246636562e-14	1.93374159791532e-12	Solyc01g101050_3	1	90786801	90789593	+	2675	protein_coding	NA && sp|A7QEU4|PER5_VITVI Peroxidase 5 OS=Vitis vinifera OX=29760 GN=GSVIVT00037159001 PE=1 SV=2 && PF00141:Peroxidase	NAC
Solyc06g008170_3	949.032115259983	989.686461545114	1345.47061719955	550.51581326111	496.966131916848	476.137019045116	1094.72973133488	507.872988074358	1.10804778584218	1.03260654311732e-13	2.14828249677023e-12	Solyc06g008170_3	6	2051067	2053646	+	862	protein_coding	NA && sp|P49690|RL23_ARATH 60S ribosomal protein L23 OS=Arabidopsis thaliana OX=3702 GN=RPL23A PE=2 SV=3 && PF00238:Ribosomal protein L14p/L23e	WRKY
Solyc01g065980_3	398.698064950819	368.637661832937	355.923913270811	867.73611404933	752.571323969622	751.654507593695	374.419880018189	790.653981870882	-1.07839110641329	1.0600893089644e-13	2.20078137874825e-12	Solyc01g065980_3	1	72593184	72602924	-	1291	protein_coding	NA && sp|P42736|RAP23_ARATH Ethylene-responsive transcription factor RAP2-3 OS=Arabidopsis thaliana OX=3702 GN=RAP2-3 PE=1 SV=2 && PF00847:AP2 domain	ERF
Solyc12g007110_2	593.471873730072	595.220683278022	882.63915488769	259.473886809782	241.360939864074	283.54226976844	690.443903965261	261.459032147432	1.39973249167	1.08322699248358e-13	2.24643377456049e-12	Solyc12g007110_2	12	1549549	1559999	+	3009	protein_coding	NA && sp|Q9LV48|PERK1_ARATH Proline-rich receptor-like protein kinase PERK1 OS=Arabidopsis thaliana OX=3702 GN=PERK1 PE=1 SV=1 && PF10502:Signal peptidase, peptidase S26|PF07714:Protein tyrosine kinase	GRAS
Solyc04g014210_3	86.2756468418166	39.9161799436938	20.8600095689853	378.816475698554	292.798517212156	294.241978061589	49.0172787848319	321.952323657433	-2.71780732193081	1.11294462386368e-13	2.3056208361248e-12	Solyc04g014210_3	4	4509404	4517860	+	5658	protein_coding	NA && sp|F4KGU4|DEAHC_ARATH ATP-dependent RNA helicase DEAH12, chloroplastic OS=Arabidopsis thaliana OX=3702 GN=At5g10370 PE=3 SV=1 && PF04408:Helicase associated domain (HA2)|PF00271:Helicase conserved C-terminal domain|PF07717:Oligonucleotide/oligosaccharide-binding (OB)-fold|PF01485:IBR domain, a half RING-finger domain|PF00270:DEAD/DEAH box helicase	FAR1
Solyc08g078340_3	551.641257079494	628.092831466946	535.841495803309	211.736851254273	250.857107989874	245.424558974098	571.858528116583	236.006172739415	1.27709759820632	1.12740881484855e-13	2.33311652941755e-12	Solyc08g078340_3	8	62276771	62280750	+	2565	protein_coding	NA && sp|Q9LVS0|KUA1_ARATH Transcription factor KUA1 OS=Arabidopsis thaliana OX=3702 GN=KUA1 PE=1 SV=1 && PF00249:Myb-like DNA-binding domain	MYB_related
Solyc05g053080_2	220.917944185864	291.153312530472	195.562589709237	24.6384699641336	9.49616812579964	46.1424920142037	235.877948808524	26.7590433680456	3.12927355313906	1.14845882718185e-13	2.3741687919471e-12	Solyc05g053080_2	5	64059853	64062269	+	620	protein_coding	NA && - && -	-
Solyc08g062680_1	900.665464757752	893.418027563264	971.294195555877	510.478299569393	458.981459413649	410.601305749581	921.792562625631	460.020354910874	1.00344503945173	1.18755438169891e-13	2.45240001376788e-12	Solyc08g062680_1	8	51841433	51841906	-	474	protein_coding	NA && - && PF13359:DDE superfamily endonuclease	SBP
novel.1323	81.0468197604944	58.7002646230791	19.5562589709237	287.962117705811	319.704326901921	372.483594955238	53.1011144514991	326.716679854324	-2.62042010604362	1.21858794827e-13	2.51383522268512e-12	-	SL3.00SC0000654	3458	4112	-	557	-	- && - && -	-
Solyc02g091660_3	135.949504114378	83.3543757647723	66.4912805011406	3.84976093189587	1.58269468763327	4.01239060993076	95.2650534600969	3.14828207648663	4.90516322430664	1.29344611890078e-13	2.66545207049691e-12	Solyc02g091660_3	2	53539149	53543594	-	4278	protein_coding	NA && sp|Q7Y214|GTE7_ARATH Transcription factor GTE7 OS=Arabidopsis thaliana OX=3702 GN=GTE7 PE=2 SV=1 && PF17035:Bromodomain extra-terminal - transcription regulation|PF00439:Bromodomain	HB-other
Solyc01g101180_3	420.920580046439	503.648270466019	567.131510156787	191.718094408415	96.5443759456297	92.9537157967292	497.233453556415	127.072062050258	1.96992290636505	1.33078578186877e-13	2.7395155890268e-12	Solyc01g101180_3	1	90897700	90899922	+	1806	protein_coding	NA && sp|G5CV45|TPS32_SOLLC Viridiflorene synthase OS=Solanum lycopersicum OX=4081 GN=TPS32 PE=1 SV=1 && PF03936:Terpene synthase family, metal binding domain|PF01397:Terpene synthase, N-terminal domain	GRAS
Solyc01g088100_3	445.757508682719	615.178773249869	470.65396590023	1132.59966616377	1076.23238759063	990.391748884575	510.53008261094	1066.40793421299	-1.06082167205165	1.34632967894671e-13	2.76860253411132e-12	Solyc01g088100_3	1	82835419	82840057	+	3317	protein_coding	NA && sp|Q0D3J9|C3H53_ORYSJ Zinc finger CCCH domain-containing protein 53 OS=Oryza sativa subsp. japonica OX=39947 GN=Os07g0682400 PE=2 SV=1 && PF00076:RNA recognition motif. (a.k.a. RRM, RBD, or RNP domain)	C3H
Solyc02g078860_3	203.924256171567	228.931032030009	194.258839111175	543.586243583698	656.818295367809	476.805750813438	209.038042437583	559.070096588315	-1.4175972151551	1.35317545413903e-13	2.77976032168729e-12	Solyc02g078860_3	2	44066609	44069986	-	1805	protein_coding	NA && sp|Q38945|DPNPH_ARATH PAP-specific phosphatase HAL2-like OS=Arabidopsis thaliana OX=3702 GN=AHL PE=2 SV=1 && PF00459:Inositol monophosphatase family	bHLH
Solyc01g094960_3	371.246722773878	469.602116984633	455.008958723491	162.459911326006	80.717429069297	94.2911793333728	431.952599494001	112.489506576225	1.94223348592997	1.3677954681958e-13	2.80684820554184e-12	Solyc01g094960_3	1	86232632	86240402	+	3651	protein_coding	NA && sp|Q40353|MMK2_MEDSA Mitogen-activated protein kinase homolog MMK2 OS=Medicago sativa OX=3879 GN=MMK2 PE=2 SV=1 && PF00295:Glycosyl hydrolases family 28	MYB_related
Solyc03g116530_3	321.572865501316	447.296016427863	477.172718890538	149.37072415756	85.4655131321968	89.6100569551202	415.347200273239	108.148764748292	1.94268623582084	1.45916762135443e-13	2.99121722756604e-12	Solyc03g116530_3	3	67397153	67398567	-	1014	protein_coding	NA && - && PF00903:Glyoxalase/Bleomycin resistance protein/Dioxygenase superfamily	NAC
Solyc10g083460_1	128.106263492394	92.746418104465	147.323817580959	13.089187168446	3.16538937526655	2.67492707328717	122.725499725939	6.3098345389999	4.29388493236628	1.5012495337899e-13	3.07426382039799e-12	Solyc10g083460_1	10	63377213	63377692	+	480	protein_coding	NA && sp|Q9SJM6|SAP4_ARATH Zinc finger A20 and AN1 domain-containing stress-associated protein 4 OS=Arabidopsis thaliana OX=3702 GN=SAP4 PE=1 SV=1 && PF01754:A20-like zinc finger|PF01428:AN1-like Zinc finger	NF-YB
Solyc05g006520_3	334.644933204622	329.895487181705	290.736383367732	641.370171253853	770.772312877404	715.542992104318	318.425601251353	709.228492078525	-1.15489640786051	1.56543599704508e-13	3.20235533063234e-12	Solyc05g006520_3	5	1134270	1140944	-	1537	protein_coding	NA && sp|P52903|ODPA_SOLTU Pyruvate dehydrogenase E1 component subunit alpha, mitochondrial OS=Solanum tuberosum OX=4113 PE=1 SV=1 && PF00676:Dehydrogenase E1 component	E2F/DP
Solyc01g100010_3	426.149407127761	313.459413087242	402.858934801028	100.863736415672	131.363659073562	72.2230309787536	380.822585005344	101.483475489329	1.91060344177093	1.61502150762067e-13	3.30034196813046e-12	Solyc01g100010_3	1	89957452	89968203	-	3155	protein_coding	NA && sp|O80494|P2B15_ARATH F-box protein PP2-B15 OS=Arabidopsis thaliana OX=3702 GN=PP2B15 PE=2 SV=2 && PF14299:Phloem protein 2	HD-ZIP
Solyc08g021870_2	159.479225980328	201.928910303392	168.183827149944	30.0281352687878	22.1577256268658	34.7740519527332	176.530654477888	28.986637616129	2.60285225161863	1.61758299067291e-13	3.30212953163749e-12	Solyc08g021870_2	8	34344673	34346074	-	742	protein_coding	NA && - && PF12796:Ankyrin repeats (3 copies)	NF-YA
Solyc01g091360_3	162.093639520989	179.622809746622	178.613831934436	30.0281352687878	11.8702101572496	27.4180025011935	173.443427067349	23.105449309077	2.9033987809679	1.64709437350261e-13	3.35887151563132e-12	Solyc01g091360_3	1	84874869	84878357	+	2041	protein_coding	NA && - && PF07386:Protein of unknown function (DUF1499)	Trihelix
Solyc07g063620_3	197.388222319914	93.9204233969266	118.641304423604	4.61971311827505	15.8269468763327	4.01239060993076	136.649983380148	8.15301686817951	4.0826177552406	1.74127684530669e-13	3.54724004168252e-12	Solyc07g063620_3	7	66175690	66178222	+	1366	protein_coding	NA && - && PF06764:Protein of unknown function (DUF1223)	-
Solyc12g014610_2	20.9153083252889	46.9602116984633	54.7575251185864	259.473886809782	193.880099235076	293.573246293267	40.8776817141128	248.975744112708	-2.60481363049032	1.80325440472933e-13	3.66967894816903e-12	Solyc12g014610_2	12	5610137	5616649	+	2338	protein_coding	NA && sp|Q93WV0|WRK20_ARATH Probable WRKY transcription factor 20 OS=Arabidopsis thaliana OX=3702 GN=WRKY20 PE=2 SV=1 && PF03106:WRKY DNA -binding domain	WRKY
Solyc12g005290_2	367.325102462886	403.857820606784	413.288939585521	124.732254193426	129.780964385928	154.477038482334	394.823954218397	136.33008568723	1.53264382469079	1.82799734272256e-13	3.71616863743297e-12	Solyc12g005290_2	12	173193	180706	-	6718	protein_coding	NA && sp|O81832|Y4729_ARATH G-type lectin S-receptor-like serine/threonine-protein kinase At4g27290 OS=Arabidopsis thaliana OX=3702 GN=At4g27290 PE=3 SV=4 && PF01453:D-mannose binding lectin|PF07714:Protein tyrosine kinase|PF00954:S-locus glycoprotein domain|PF11883:Domain of unknown function (DUF3403)|PF08276:PAN-like domain	MYB_related
Solyc11g011960_2	393.469237869497	401.509810021861	522.803989822694	1087.94243935377	833.288753038919	995.072871262827	439.261012571351	972.10135455184	-1.1468322892272	1.88966805273173e-13	3.8375551315694e-12	Solyc11g011960_2	11	4912777	4919296	-	1690	protein_coding	NA && sp|P19595|UGPA_SOLTU UTP--glucose-1-phosphate uridylyltransferase OS=Solanum tuberosum OX=4113 PE=1 SV=3 && PF01704:UTP--glucose-1-phosphate uridylyltransferase	-
Solyc01g081440_3	175.165707224294	95.0944286893882	114.730052629419	468.130929318538	420.205439566634	418.626086969442	128.330062847701	435.654151951538	-1.76611758385966	1.99399968433609e-13	4.04523645805674e-12	Solyc01g081440_3	1	80500439	80505752	-	2795	protein_coding	NA && - && PF06219:Protein of unknown function (DUF1005)	M-type_MADS
Solyc04g015220_3	260.13414729578	227.757026737547	345.493908486319	765.3324732609	599.841286613011	840.595832780493	277.795027506549	735.256530884801	-1.40614769618647	2.11389356845969e-13	4.27959611062413e-12	Solyc04g015220_3	4	5406932	5412127	-	2876	protein_coding	NA && sp|Q6L400|R1B16_SOLDE Putative late blight resistance protein homolog R1B-16 OS=Solanum demissum OX=50514 GN=R1B-16 PE=3 SV=1 && PF00931:NB-ARC domain	C3H
Solyc03g097990_3	266.670181147433	579.958614476022	582.776517333526	106.253401720326	99.7097653208963	138.427476042611	476.468437652327	114.796881027944	2.0521419891061	2.14918613192594e-13	4.34655133313163e-12	Solyc03g097990_3	3	61784781	61789555	-	1466	protein_coding	NA && sp|Q6PC19|SSU72_DANRE RNA polymerase II subunit A C-terminal domain phosphatase SSU72 OS=Danio rerio OX=7955 GN=ssu72 PE=2 SV=1 && PF04722:Ssu72-like protein	-
Solyc12g088210_2	419.613373276108	347.505566568628	353.316412074688	96.2440232973969	108.414586102879	139.764939579255	373.478450639808	114.807849659844	1.69904169964245	2.19242279897659e-13	4.42941807384569e-12	Solyc12g088210_2	12	64626631	64638421	+	4060	protein_coding	NA && sp|A0A1P8AWH8|XYN1_ARATH Endo-1,4-beta-xylanase 1 OS=Arabidopsis thaliana OX=3702 GN=XYN1 PE=1 SV=1 && PF02018:Carbohydrate binding domain|PF05770:Inositol 1,3,4-trisphosphate 5/6-kinase ATP-grasp domain|PF17927:Inositol 1,3,4-trisphosphate 5/6-kinase pre-ATP-grasp domain|PF00331:Glycosyl hydrolase family 10	NAC
Solyc07g063700_2	503.274606577264	535.346413362481	413.288939585521	118.572636702393	177.261805014927	181.895040983528	483.969986508422	159.243160900282	1.60306041525988	2.22893305238496e-13	4.49853838830313e-12	Solyc07g063700_2	7	66222825	66231472	-	4689	protein_coding	NA && sp|O81832|Y4729_ARATH G-type lectin S-receptor-like serine/threonine-protein kinase At4g27290 OS=Arabidopsis thaliana OX=3702 GN=At4g27290 PE=3 SV=4 && PF11883:Domain of unknown function (DUF3403)|PF00069:Protein kinase domain|PF01453:D-mannose binding lectin|PF00954:S-locus glycoprotein domain|PF08276:PAN-like domain	MYB_related
Solyc02g090770_1	115.034195789089	89.2244022270802	83.4400382759411	0	0	0	95.8995454307034	0	9.45765154593892	2.25191705655645e-13	4.54024513040222e-12	Solyc02g090770_1	2	52918019	52918630	-	612	protein_coding	NA && sp|Q70II3|EF110_ARATH Ethylene-responsive transcription factor ERF110 OS=Arabidopsis thaliana OX=3702 GN=ERF110 PE=2 SV=2 && PF00847:AP2 domain	ERF
Solyc12g006050_2	91.5044739231388	138.532624510467	65.187529903079	0	0	0	98.4082094455615	0	9.49631051331278	2.67794850356613e-13	5.3880984434033e-12	Solyc12g006050_2	12	644987	648386	+	2929	protein_coding	NA && sp|Q9LVE0|PTR33_ARATH Protein NRT1/ PTR FAMILY 6.4 OS=Arabidopsis thaliana OX=3702 GN=NPF6.4 PE=1 SV=1 && PF00854:POT family	C3H
Solyc12g056980_1	36.6017895692555	14.088063509539	10.4300047844926	166.309672257902	264.310012834757	155.814502018978	20.3732859544291	195.478062370545	-3.26756913186109	2.89926587056433e-13	5.82142850749107e-12	Solyc12g056980_1	12	64012226	64013239	+	924	protein_coding	NA && sp|Q8H1E4|RAP24_ARATH Ethylene-responsive transcription factor RAP2-4 OS=Arabidopsis thaliana OX=3702 GN=RAP2-4 PE=1 SV=1 && PF00847:AP2 domain	ERF
Solyc01g095100_3	814.389817915936	697.35914372218	693.595318168761	375.736666953037	322.869716277188	302.26675928145	735.114759935625	333.624380837225	1.14019813072651	2.95313942481968e-13	5.92352566800152e-12	Solyc01g095100_3	1	86374134	86375837	+	1337	protein_coding	NA && sp|O04609|WRK22_ARATH WRKY transcription factor 22 OS=Arabidopsis thaliana OX=3702 GN=WRKY22 PE=2 SV=1 && PF03106:WRKY DNA -binding domain	WRKY
Solyc01g088480_3	458.829576386025	301.719360162627	425.022694968075	114.722875770497	131.363659073562	79.5790804302933	395.190543838909	108.555205091451	1.86615236760168	2.96922364434823e-13	5.94969204558909e-12	Solyc01g088480_3	1	83136644	83142965	-	2955	protein_coding	NA && sp|O04905|KCY3_ARATH UMP-CMP kinase 3 OS=Arabidopsis thaliana OX=3702 GN=UMK3 PE=1 SV=1 && PF00861:Ribosomal L18 of archaea, bacteria, mitoch. and chloroplast	C2H2
Solyc09g090470_3	0	0	0	118.572636702393	138.485785167911	136.421280737646	0	131.159900869317	-9.14440720648116	2.98254147080007e-13	5.97026731838986e-12	Solyc09g090470_3	9	70456847	70463570	+	2011	protein_coding	NA && sp|Q9FNL7|PTR3_ARATH Protein NRT1/ PTR FAMILY 5.2 OS=Arabidopsis thaliana OX=3702 GN=NPF5.2 PE=2 SV=1 && PF00854:POT family	G2-like
Solyc01g099880_3	104.576541626444	79.8323598873876	95.1737936584953	0	0	0	93.1942317241091	0	9.41613706264243	3.15304530619869e-13	6.29869060810733e-12	Solyc01g099880_3	1	89887618	89890786	-	1439	protein_coding	NA && sp|Q10LN5|SWT16_ORYSJ Bidirectional sugar transporter SWEET16 OS=Oryza sativa subsp. japonica OX=39947 GN=SWEET16 PE=3 SV=1 && PF03083:Sugar efflux transporter for intercellular exchange	DBB
Solyc08g078910_2	213.07470356388	447.296016427863	139.501313992589	3432.44684687836	3161.43263854746	3683.37457991643	266.624011328111	3425.75135511409	-3.68269124047312	3.16376481815442e-13	6.31366196177463e-12	Solyc08g078910_2	8	62696544	62700466	-	666	protein_coding	NA && sp|P14009|14KD_DAUCA 14 kDa proline-rich protein DC2.15 OS=Daucus carota OX=4039 PE=2 SV=1 && PF14547:Hydrophobic seed protein	Trihelix
Solyc06g061210_3	122.877436411072	83.3543757647723	76.9212852856332	0	0	0	94.3843658204926	0	9.43453137174972	3.31668649858139e-13	6.60536842143722e-12	Solyc06g061210_3	6	39325143	39327111	-	1596	protein_coding	NA && sp|Q9M5Q1|FUT1_PEA Galactoside 2-alpha-L-fucosyltransferase OS=Pisum sativum OX=3888 GN=FT1 PE=2 SV=1 && PF03254:Xyloglucan fucosyltransferase	B3
Solyc02g021400_2	560.791704471808	659.790974363409	518.892738028509	258.703934623403	239.778245176441	209.313043484721	579.825138954575	235.931741094855	1.29894526322983	3.49183144613319e-13	6.94005931177152e-12	Solyc02g021400_2	2	23095711	23097355	+	349	protein_coding	NA && sp|P46302|RS28_MAIZE 40S ribosomal protein S28 OS=Zea mays OX=4577 GN=RPS28 PE=3 SV=1 && -	bHLH
Solyc02g085285_1	226.146771267186	273.543233143549	250.320114827823	72.3755055196424	34.819283127932	36.1115154893768	250.003373079519	47.7687680456504	2.39047428682795	3.9153646916229e-13	7.77394468234295e-12	Solyc02g085285_1	2	48878249	48880274	-	288	protein_coding	NA && - && -	-
Solyc12g100260_1	309.808004568341	374.507688295245	340.278906094072	705.276202723324	703.50778865299	798.46573137622	341.531532985886	735.749907584178	-1.10659815167116	3.98814552713714e-13	7.91042806329926e-12	Solyc12g100260_1	12	68019981	68020145	+	165	protein_coding	NA && sp|P48630|FD6E1_SOYBN Omega-6 fatty acid desaturase, endoplasmic reticulum isozyme 1 OS=Glycine max OX=3847 GN=FAD2-1 PE=2 SV=1 && -	-
Solyc01g091520_3	163.400846291319	76.3103440100028	91.2625418643106	404.224897849067	407.543882065568	442.031698860705	110.324577388544	417.933492925113	-1.92498018579847	4.00081049953372e-13	7.91950122845011e-12	Solyc01g091520_3	1	85019469	85020215	+	747	protein_coding	NA && sp|O04469|ECI1_ARATH Enoyl-CoA delta isomerase 1, peroxisomal OS=Arabidopsis thaliana OX=3702 GN=ECI1 PE=1 SV=1 && PF00378:Enoyl-CoA hydratase/isomerase	WRKY
Solyc06g066540_1	112.419782248428	117.400529246158	110.818800835234	9.2394262365501	11.0788628134329	2.67492707328717	113.546370776607	7.6644053744234	3.90849469780161	4.07959623037073e-13	8.0672985254513e-12	Solyc06g066540_1	6	41914250	41914828	-	579	protein_coding	NA && sp|Q9LYD3|DREB3_ARATH Dehydration-responsive element-binding protein 3 OS=Arabidopsis thaliana OX=3702 GN=DREB3 PE=2 SV=1 && PF00847:AP2 domain	ERF
Solyc12g010420_1	864.063675188497	747.841371298028	865.690397112889	82.3848839425717	91.7962918827299	26.7492707328717	825.865147866471	66.9768155193911	3.6268060430296	4.29782261063812e-13	8.49025966180248e-12	Solyc12g010420_1	12	3460553	3460723	-	171	protein_coding	NA && - && -	-
novel.1294	145.099951506692	133.83660334062	157.753822365451	446.572268099921	391.716935189235	389.870620931605	145.563459070921	409.386608073587	-1.49266827909824	4.64998426647229e-13	9.17668770007339e-12	-	SL3.00SC0000187	1316	7007	+	1845	-	- && sp|Q9LVQ0|PME31_ARATH Pectinesterase 31 OS=Arabidopsis thaliana OX=3702 GN=PME31 PE=1 SV=1 && PF01095:Pectinesterase	NAC
Solyc08g068300_3	495.43136595528	420.293894701246	426.326445566137	884.675062149672	831.706058351285	997.079066567793	447.350568740888	904.486729022917	-1.01676359437373	4.66849777340135e-13	9.20394571096457e-12	Solyc08g068300_3	8	57460492	57468215	+	1247	protein_coding	NA && sp|Q3SZX8|CCD25_BOVIN Coiled-coil domain-containing protein 25 OS=Bos taurus OX=9913 GN=CCDC25 PE=2 SV=1 && PF05670:NFACT protein RNA binding domain	MYB
Solyc03g097840_3	207.845876482558	286.457291360626	149.931318777082	20.7887090322377	34.819283127932	5.34985414657434	214.744828873422	20.319282102248	3.4146835183829	4.81098892484908e-13	9.47532496798495e-12	Solyc03g097840_3	3	61600672	61604549	-	2734	protein_coding	NA && sp|Q9FMU6|MPCP3_ARATH Mitochondrial phosphate carrier protein 3, mitochondrial OS=Arabidopsis thaliana OX=3702 GN=MPT3 PE=1 SV=1 && PF00153:Mitochondrial carrier protein	TALE
Solyc03g119200_3	169.936880142972	136.184613925544	204.688843895668	485.839829605259	486.678616447232	452.062675385532	170.270112654728	474.860373812674	-1.48171009129694	4.82755309704546e-13	9.49839266139286e-12	Solyc03g119200_3	3	69347461	69352530	+	1711	protein_coding	NA && sp|B9I2J6|AXEP_POPTR L-Ala-D/L-amino acid epimerase OS=Populus trichocarpa OX=3694 GN=POPTR_0012s05040g PE=3 SV=2 && PF13378:Enolase C-terminal domain-like|PF02746:Mandelate racemase / muconate lactonizing enzyme, N-terminal domain	NF-YB
Solyc06g009380_3	420.920580046439	437.90397408817	458.920210517676	184.788524731002	156.686774075694	165.176746775483	439.248254884095	168.88401519406	1.37906905546378	4.96504985772305e-13	9.74932608471857e-12	Solyc06g009380_3	6	3294565	3298081	-	1523	protein_coding	NA && - && -	-
Solyc05g005170_3	0	0	0	120.112541075151	123.450185635395	131.740158359393	0	125.10096168998	-9.07624911137574	5.16386258634285e-13	1.01295528910655e-11	Solyc05g005170_3	5	159158	162275	+	1596	protein_coding	NA && sp|Q949Z1|PGLR4_ARATH Polygalacturonase At1g48100 OS=Arabidopsis thaliana OX=3702 GN=At1g48100 PE=2 SV=1 && PF00295:Glycosyl hydrolases family 28	C3H
Solyc02g023950_3	172.551293683633	150.272677435083	143.412565786774	26.1783743368919	22.1577256268658	10.6997082931487	155.412178968497	19.6786027523022	2.99008254544259	5.49275584570935e-13	1.07639320511964e-11	Solyc02g023950_3	2	25060404	25065270	-	4016	protein_coding	NA && sp|C0LGQ9|GHR1_ARATH LRR receptor-like serine/threonine-protein kinase GHR1 OS=Arabidopsis thaliana OX=3702 GN=GHR1 PE=1 SV=2 && PF13855:Leucine rich repeat|PF08263:Leucine rich repeat N-terminal domain|PF07714:Protein tyrosine kinase	S1Fa-like
Solyc07g063650_3	284.971075932061	307.589386624935	262.053870210378	785.351230106758	618.83362286461	608.545909172831	284.871444255791	670.910254048067	-1.23475160492193	5.66140138957031e-13	1.10833255003618e-11	Solyc07g063650_3	7	66186965	66200643	-	4180	protein_coding	NA && sp|Q8L6Y1|UBP14_ARATH Ubiquitin carboxyl-terminal hydrolase 14 OS=Arabidopsis thaliana OX=3702 GN=UBP14 PE=1 SV=1 && PF17807:Variant UBP zinc finger|PF00627:UBA/TS-N domain|PF00443:Ubiquitin carboxyl-terminal hydrolase|PF02148:Zn-finger in ubiquitin-hydrolases and other protein	GeBP
Solyc02g079010_3	226.146771267186	194.884878548623	216.422599278222	23.8685177777544	54.602966723348	24.0743436595845	212.48474969801	34.181942720229	2.64155737569869	5.82369051177124e-13	1.13896492656289e-11	Solyc02g079010_3	2	44190749	44192541	+	1573	protein_coding	NA && - && PF14364:Domain of unknown function (DUF4408)|PF05553:Cotton fibre expressed protein	-
Solyc03g031760_3	0	0	0	138.591393548251	150.355995325161	92.2849840284074	0	127.07745763394	-9.09792515408724	5.91323078587831e-13	1.15532254585968e-11	Solyc03g031760_3	3	4255981	4259591	-	2166	protein_coding	NA && sp|Q93V99|PDF2_ARATH Homeobox-leucine zipper protein PROTODERMAL FACTOR 2 OS=Arabidopsis thaliana OX=3702 GN=PDF2 PE=1 SV=1 && PF01852:START domain	HD-ZIP
Solyc03g083010_3	571.249358634452	424.989915871093	619.28153407925	200.957520644965	104.457849383796	175.876455068631	538.506936194932	160.430608365797	1.74523133468983	5.93799484174827e-13	1.15900423745669e-11	Solyc03g083010_3	3	54278221	54284404	+	2266	protein_coding	NA && - && PF00561:alpha/beta hydrolase fold	-
Solyc03g005960_3	7.84324062198333	0	7.82250358836948	117.032732329635	110.788628134329	127.059035981141	5.22191473678427	118.293465481701	-4.53332480040065	6.03370098609717e-13	1.17651159566558e-11	Solyc03g005960_3	3	646199	656342	+	3878	protein_coding	NA && sp|C0LGG7|Y1534_ARATH Probable LRR receptor-like serine/threonine-protein kinase At1g53420 OS=Arabidopsis thaliana OX=3702 GN=At1g53420 PE=2 SV=2 && PF00069:Protein kinase domain|PF13855:Leucine rich repeat|PF11721:Malectin domain	ERF
Solyc10g008910_1	281.049455621069	223.061005567701	211.207596885976	32.3379918279254	56.9770087547979	58.179663843996	238.439352691582	49.1648881422397	2.2756884764917	6.05838254701126e-13	1.18014880719243e-11	Solyc10g008910_1	10	2925230	2925640	+	411	protein_coding	NA && sp|P59226|H32_ARATH Histone H3.2 OS=Arabidopsis thaliana OX=3702 GN=HTR2 PE=1 SV=2 && PF00125:Core histone H2A/H2B/H3/H4	B3
Solyc07g065165_1	188.2377749276	190.188857378776	271.180124396809	40.0375136917171	35.6106304717487	53.4985414657434	216.535585567728	43.0488952097364	2.32614585652088	6.1754774691451e-13	1.20176264824507e-11	Solyc07g065165_1	7	67175416	67178000	-	981	protein_coding	NA && sp|Q9LPS9|PRNL1_ARATH Pirin-like protein At1g50590 OS=Arabidopsis thaliana OX=3702 GN=At1g50590 PE=2 SV=1 && PF05726:Pirin C-terminal cupin domain|PF02678:Pirin	-
Solyc08g007460_2	1335.96531927783	1321.92995931174	1057.34173502794	717.595437705391	598.258591925378	526.291901669251	1238.4123378725	614.048643766673	1.01306145623591	6.36169221297568e-13	1.23677108692577e-11	Solyc08g007460_2	8	2031880	2034537	+	742	protein_coding	NA && sp|Q9LJ86|LTPG5_ARATH Non-specific lipid transfer protein GPI-anchored 5 OS=Arabidopsis thaliana OX=3702 GN=LTPG5 PE=2 SV=1 && PF14368:Probable lipid transfer	-
Solyc02g067600_1	479.744884711314	436.729968795709	414.592690183582	123.962302007047	97.3357232894463	32.099124879446	443.689181230201	84.4657167253132	2.39764715493763	6.49911166359617e-13	1.26223322458554e-11	Solyc02g067600_1	2	38312337	38312660	+	324	protein_coding	NA && - && -	-
Solyc11g062440_2	937.267254327008	808.88964650603	720.974080728054	401.14508910355	407.543882065568	336.372079465862	822.376993853697	381.687016878327	1.10830397333828	6.56110128685189e-13	1.27300971152329e-11	Solyc11g062440_2	11	49795914	49802478	-	2191	protein_coding	NA && sp|Q40588|ASO_TOBAC L-ascorbate oxidase OS=Nicotiana tabacum OX=4097 GN=AAO PE=2 SV=1 && PF07731:Multicopper oxidase|PF07732:Multicopper oxidase|PF00394:Multicopper oxidase	bHLH
Solyc02g077370_1	568.634945093791	855.849858204493	749.656593885408	231.755608100132	324.452410964821	292.235782756623	724.713799061231	282.814600607192	1.35817198719172	6.94369542380451e-13	1.34590817140417e-11	PTI5	2	42890880	42891365	-	486	protein_coding	NA && sp|O04681|PTI5_SOLLC Pathogenesis-related genes transcriptional activator PTI5 OS=Solanum lycopersicum OX=4081 GN=PTI5 PE=2 SV=1 && PF00847:AP2 domain	ERF
Solyc02g082350_3	495.43136595528	473.124132862018	507.158982645955	218.666420931686	198.628183297976	169.189137385414	491.904827154417	195.494580538358	1.33241177296668	7.14438174542092e-13	1.38343779851736e-11	Solyc02g082350_3	2	46602116	46606477	+	3951	protein_coding	NA && sp|Q9SVW8|PIRL4_ARATH Plant intracellular Ras-group-related LRR protein 4 OS=Arabidopsis thaliana OX=3702 GN=PIRL4 PE=1 SV=1 && PF13855:Leucine rich repeat	ERF
Solyc02g063330_3	130.720677033055	58.7002646230791	83.4400382759411	0	0	0	90.9536599773586	0	9.38046974182012	8.32512216719483e-13	1.60889355051504e-11	Solyc02g063330_3	2	35943052	35947022	+	3138	protein_coding	NA && sp|Q5XF57|Y5576_ARATH Probable receptor-like serine/threonine-protein kinase At5g57670 OS=Arabidopsis thaliana OX=3702 GN=At5g57670 PE=2 SV=1 && PF00069:Protein kinase domain	C3H
Solyc09g084465_1	78.4324062198333	89.2244022270802	91.2625418643106	0	0	0	86.3064501037414	0	9.30594936908538	8.43738455275275e-13	1.62898103934162e-11	Solyc09g084465_1	9	69557929	69567595	+	916	protein_coding	NA && sp|P05118|ICI1_SOLLC Wound-induced proteinase inhibitor 1 OS=Solanum lycopersicum OX=4081 GN=PIIF PE=2 SV=1 && PF00280:Potato inhibitor I family	-
Solyc07g008900_3	129.413470262725	150.272677435083	139.501313992589	414.234276271996	434.449691755334	352.421641905585	139.729153896799	400.368536644305	-1.51714806433577	8.84092393618655e-13	1.70520953594802e-11	Solyc07g008900_3	7	3887005	3899150	+	3128	protein_coding	NA && sp|O64481|SBT25_ARATH Subtilisin-like protease SBT2.5 OS=Arabidopsis thaliana OX=3702 GN=SBT2.5 PE=2 SV=1 && PF00082:Subtilase family|PF02225:PA domain|PF05922:Peptidase inhibitor I9|PF17766:Fibronectin type-III domain	LSD
Solyc10g076670_2	109.805368707767	112.704508076312	61.2762781088943	3.0798087455167	0	0	94.5953849643242	1.02660291517223	6.56974465501485	8.92070063762674e-13	1.71890311400412e-11	Solyc10g076670_2	10	59725334	59728419	+	1054	protein_coding	NA && sp|Q9FFF6|JOX2_ARATH Jasmonate-induced oxygenase 2 OS=Arabidopsis thaliana OX=3702 GN=JOX2 PE=1 SV=1 && PF14226:non-haem dioxygenase in morphine synthesis N-terminal	STAT
Solyc02g071610_3	75.8179926791722	122.096550416005	65.187529903079	3.0798087455167	0	2.67492707328717	87.7006909994186	1.91824527293462	5.4911713047906	8.99344177659095e-13	1.73121543422145e-11	Solyc02g071610_3	2	41578762	41586839	+	2526	protein_coding	NA && sp|Q9C7N4|GDL15_ARATH GDSL esterase/lipase At1g29670 OS=Arabidopsis thaliana OX=3702 GN=At1g29670 PE=2 SV=1 && PF00657:GDSL-like Lipase/Acylhydrolase	ERF
Solyc10g008280_3	715.042103370813	743.145350128181	745.745342091224	339.548914193216	395.673671908319	341.053201844114	734.64426519674	358.758595981883	1.03473356269663	9.43672860894804e-13	1.81476263239072e-11	Solyc10g008280_3	10	2400135	2407954	-	3429	protein_coding	NA && sp|F4I114|Y1960_ARATH Probable serine/threonine-protein kinase At1g09600 OS=Arabidopsis thaliana OX=3702 GN=At1g09600 PE=3 SV=1 && PF00069:Protein kinase domain	C3H
Solyc03g078640_1	116.341402559419	125.618566293389	147.323817580959	384.206141003208	475.599753633799	340.384470075792	129.761262144589	400.063454904267	-1.62402438028713	1.07043360774871e-12	2.05651410587798e-11	Solyc03g078640_1	3	52687368	52688822	-	1455	protein_coding	NA && - && -	-
Solyc11g068620_2	189.54498169793	180.796815039084	196.866340307299	18.4788524731002	1.58269468763327	25.4118071962281	189.069379014771	15.1577847856539	3.62744039054815	1.1146310601558e-12	2.13723136774438e-11	Solyc11g068620_2	11	53561258	53563807	-	1090	protein_coding	NA && sp|Q9FMR3|NAC90_ARATH NAC domain-containing protein 90 OS=Arabidopsis thaliana OX=3702 GN=NAC090 PE=1 SV=1 && PF02365:No apical meristem (NAM) protein	NAC
Solyc08g007840_2	98.0405077747916	105.660476321542	57.3650263147095	0	0	0	87.0220034703478	0	9.31836309789306	1.15690116872977e-12	2.21611097653842e-11	Solyc08g007840_2	8	2350854	2352120	-	1050	protein_coding	NA && sp|Q9FJ90|ERF25_ARATH Ethylene-responsive transcription factor ERF025 OS=Arabidopsis thaliana OX=3702 GN=ERF025 PE=2 SV=1 && PF00847:AP2 domain	ERF
Solyc07g053170_3	273.206214999086	558.826519211713	357.227663868873	63.9060314694715	116.328059541046	97.6348381749817	396.420132693224	92.6229763951663	2.09866622300689	1.24046948611808e-12	2.37154991501305e-11	Solyc07g053170_3	7	61751913	61752933	-	981	protein_coding	NA && sp|Q39008|M3K1_ARATH Mitogen-activated protein kinase kinase kinase 1 OS=Arabidopsis thaliana OX=3702 GN=MEKK1 PE=1 SV=2 && -	-
Solyc02g032950_3	173.858500453964	166.708751529545	192.955088513114	525.107391110597	409.126576753201	474.799555508473	177.840780165541	469.67784112409	-1.40195126638192	1.2928188857099e-12	2.4668143592147e-11	Solyc02g032950_3	2	29971480	29973794	-	1810	protein_coding	NA && sp|Q9C519|WRKY6_ARATH WRKY transcription factor 6 OS=Arabidopsis thaliana OX=3702 GN=WRKY6 PE=1 SV=1 && PF03106:WRKY DNA -binding domain	WRKY
Solyc08g006900_3	580.399806026766	591.698667400637	512.373985038201	239.455129963923	265.101360178573	224.693874156122	561.490819488535	243.083454766206	1.20899229439337	1.30802393429394e-12	2.49339674407717e-11	Solyc08g006900_3	8	1461168	1463812	-	983	protein_coding	NA && sp|P49211|RL321_ARATH 60S ribosomal protein L32-1 OS=Arabidopsis thaliana OX=3702 GN=RPL32A PE=2 SV=2 && PF01655:Ribosomal protein L32	-
Solyc12g006560_2	0	0	0	110.873114838601	125.032880323029	111.678205309739	0	115.861400157123	-8.9652592634137	1.33177272620366e-12	2.53127326804747e-11	Solyc12g006560_2	12	1064894	1066461	+	454	protein_coding	NA && sp|Q02921|NO93_SOYBN Early nodulin-93 OS=Glycine max OX=3847 PE=2 SV=1 && -	-
Solyc04g080580_3	101.962128085783	77.4843493024644	157.753822365451	384.206141003208	498.548826604481	359.777691357124	112.4000999179	414.177552988271	-1.88424883831589	1.68050239743019e-12	3.18790653434988e-11	Solyc04g080580_3	4	64783469	64787274	+	1322	protein_coding	NA && sp|Q63B75|IOLC1_BACCZ 5-dehydro-2-deoxygluconokinase 1 OS=Bacillus cereus (strain ZK / E33L) OX=288681 GN=iolC1 PE=3 SV=1 && PF00294:pfkB family carbohydrate kinase	STAT
Solyc02g088560_3	86.2756468418166	92.746418104465	67.7950310992022	0	0	0	82.2723653484946	0	9.23716509872074	1.76513900812471e-12	3.34522036418755e-11	Solyc02g088560_3	2	51245676	51249599	-	2626	protein_coding	NA && sp|O65718|CNGC2_ARATH Cyclic nucleotide-gated ion channel 2 OS=Arabidopsis thaliana OX=3702 GN=CNGC2 PE=1 SV=1 && PF00520:Ion transport protein|PF00027:Cyclic nucleotide-binding domain	bHLH
Solyc01g109250_2	107.190955167105	131.488592755697	122.552556217789	355.717910107179	364.81112549947	341.721933612436	120.410701380197	354.083656406362	-1.55468044984774	1.8354243373173e-12	3.47505824484147e-11	Solyc01g109250_2	1	96163270	96164145	+	876	protein_coding	NA && - && PF14009:Domain of unknown function (DUF4228)	-
Solyc12g005700_2	60.1315114352055	115.052518661235	105.603798442988	314.910444229083	446.319901912583	325.672371172713	93.5959428464762	362.30090577146	-1.94963839011276	1.86653919726244e-12	3.53055438307313e-11	Solyc12g005700_2	12	374971	377016	+	614	protein_coding	NA && - && PF06749:Protein of unknown function (DUF1218)	-
Solyc07g009050_3	24.8369286362805	37.5681693587706	13.0375059806158	189.408237849277	234.238813769725	142.439866652542	25.1475346585557	188.695639423848	-2.8983304592563	1.98230771512556e-12	3.74591101727926e-11	Solyc07g009050_3	7	4021193	4022547	-	1244	protein_coding	NA && - && -	-
Solyc10g075150_2	54.9026843538833	46.9602116984633	135.590062198404	373.4268103939	358.480346748937	405.251451603006	79.1509860835836	379.052869581948	-2.26375367522405	2.16570912433362e-12	4.0885330305766e-11	Solyc10g075150_2	10	58931442	58933070	-	763	protein_coding	NA && sp|P93224|NLTP2_SOLLC Non-specific lipid-transfer protein 2 OS=Solanum lycopersicum OX=4081 GN=LE16 PE=2 SV=1 && -	ARF
Solyc04g079640_3	235.2972186595	306.415381332473	355.923913270811	684.487493691087	794.512733191904	656.694596492	299.212171087595	711.89827445833	-1.24991959757072	2.28344499950199e-12	4.30664766428231e-11	Solyc04g079640_3	4	64118215	64124690	+	3439	protein_coding	NA && sp|O49858|C82A3_SOYBN Cytochrome P450 82A3 OS=Glycine max OX=3847 GN=CYP82A3 PE=2 SV=1 && PF00067:Cytochrome P450	G2-like
Solyc02g081580_3	167.322466602311	139.706629802928	153.842570571266	432.713128745096	455.024722694566	371.146131418595	153.623888992169	419.627994286086	-1.4502653535603	2.34644407621214e-12	4.42120651395622e-11	Solyc02g081580_3	2	46029722	46032395	-	1021	protein_coding	NA && sp|Q93V51|PSE1_ARATH Protein LEAD-SENSITIVE 1 OS=Arabidopsis thaliana OX=3702 GN=PSE1 PE=2 SV=1 && PF04970:Lecithin retinol acyltransferase	ERF
Solyc04g057997_1	464.058403467347	440.251984673093	468.046464704107	207.887090322377	163.808900170044	167.182942080448	457.452284281516	179.626310857623	1.34893356543831	2.37335386193908e-12	4.46761043799821e-11	Solyc04g057997_1	4	55060554	55085309	+	1336	protein_coding	NA && sp|P42798|R15A1_ARATH 40S ribosomal protein S15a-1 OS=Arabidopsis thaliana OX=3702 GN=RPS15AA PE=2 SV=2 && PF00410:Ribosomal protein S8	-
Solyc09g075140_3	90.1972671528083	180.796815039084	113.426302031357	13.8591393548251	6.3307787505331	1.33746353664359	128.140128074416	7.17579388066728	4.177795799569	2.45700110258784e-12	4.61619103506355e-11	Solyc09g075140_3	9	67362987	67367595	-	1378	protein_coding	NA && sp|Q9C942|CSE_ARATH Caffeoylshikimate esterase OS=Arabidopsis thaliana OX=3702 GN=CSE PE=1 SV=1 && PF12146:Serine aminopeptidase, S33	G2-like
Solyc10g005480_3	486.280918562966	508.344291635865	468.046464704107	174.009194121694	222.368603612475	199.950798728216	487.557224967646	198.776198820795	1.29483658700505	2.47639894238727e-12	4.64691244042428e-11	Solyc10g005480_3	10	351327	352818	-	815	protein_coding	NA && sp|Q8GX77|FB316_ARATH F-box protein At1g61340 OS=Arabidopsis thaliana OX=3702 GN=At1g61340 PE=2 SV=1 && -	-
Solyc02g084410_3	358.174655070572	408.553841776631	435.452699752568	9.2394262365501	39.5673671908319	12.0371718297923	400.727065533257	20.2813217523914	4.30947426762997	2.47810011125451e-12	4.64691244042428e-11	Solyc02g084410_3	2	48080133	48081779	+	1456	protein_coding	NA && - && PF00903:Glyoxalase/Bleomycin resistance protein/Dioxygenase superfamily	NAC
Solyc12g088390_2	168.629673372642	143.228645680313	130.375059806158	529.727104228872	336.322621122071	494.861508558127	147.411126286371	453.63707796969	-1.62246136954074	2.52294713622928e-12	4.72648192210149e-11	Solyc12g088390_2	12	64778806	64781884	+	1137	protein_coding	NA && sp|Q96289|ZAT10_ARATH Zinc finger protein ZAT10 OS=Arabidopsis thaliana OX=3702 GN=ZAT10 PE=2 SV=1 && PF13912:C2H2-type zinc finger	C2H2
Solyc02g085400_3	61.4387182055361	117.400529246158	92.5662924623722	0	0	4.01239060993076	90.4685133046888	1.33746353664359	5.98422712450949	2.58433562067059e-12	4.83685836002563e-11	Solyc02g085400_3	2	48956870	48960012	-	1864	protein_coding	NA && sp|Q8L7A0|TAUE3_ARATH Sulfite exporter TauE/SafE family protein 3 OS=Arabidopsis thaliana OX=3702 GN=At2g25737 PE=2 SV=1 && PF01925:Sulfite exporter TauE/SafE	C2H2
Solyc01g088660_3	194.773808779253	126.792571585851	209.903846287914	512.788156128531	474.017058946166	503.55502154631	177.156742217673	496.786745540335	-1.49055019257378	2.61629229942551e-12	4.89199181908817e-11	Solyc01g088660_3	1	83297043	83298138	+	872	protein_coding	NA && sp|O80506|FLZ3_ARATH FCS-Like Zinc finger 3 OS=Arabidopsis thaliana OX=3702 GN=FLZ3 PE=1 SV=1 && PF04570:zinc-finger of the FCS-type, C2-C2	-
Solyc04g015120_3	47.0594437319	21.1320952643085	5.21500239224632	167.079624444281	283.302349086356	252.780608425638	24.4688471294849	234.387527318758	-3.26221814962805	2.64935501511411e-12	4.94730848852948e-11	Solyc04g015120_3	4	5290532	5292470	+	1097	protein_coding	NA && - && -	-
Solyc01g009100_3	573.863772175113	679.749064335256	499.336479057585	231.755608100132	238.195550488808	265.486512023752	584.316438522652	245.14589020423	1.25312764315142	2.65093048192646e-12	4.94730848852948e-11	Solyc01g009100_3	1	3046068	3049607	+	1153	protein_coding	NA && sp|O49884|RL30_LUPLU 60S ribosomal protein L30 OS=Lupinus luteus OX=3873 GN=RPL30 PE=3 SV=1 && PF01248:Ribosomal protein L7Ae/L30e/S12e/Gadd45 family	-
Solyc11g007660_1	756.872720021391	743.145350128181	779.642857640825	355.717910107179	403.587145346485	280.867342695153	759.886975930133	346.724132716272	1.13355344218077	2.70872732844448e-12	5.05035761037691e-11	Solyc11g007660_1	11	1882703	1884514	+	1812	protein_coding	NA && sp|P0DO24|PSI3_ARATH Protein PSK SIMULATOR 3 OS=Arabidopsis thaliana OX=3702 GN=PSI3 PE=1 SV=1 && PF05003:Protein of unknown function (DUF668)|PF11961:Domain of unknown function (DUF3475)	-
Solyc02g087630_3	901.972671528083	992.034472130037	619.28153407925	394.985471612517	338.696663153521	315.641394647886	837.762892579123	349.774509804641	1.26123527782575	3.0172665703145e-12	5.62026904348686e-11	Solyc02g087630_3	2	50641862	50643977	-	1929	protein_coding	NA && sp|Q38879|TRXH2_ARATH Thioredoxin H2 OS=Arabidopsis thaliana OX=3702 GN=TRX2 PE=1 SV=2 && PF00085:Thioredoxin	bHLH
Solyc03g119360_3	1256.22570628766	1196.31139301835	872.209150103197	585.933613834552	542.072930514396	500.211362704701	1108.24874980307	542.739302351216	1.03066923583751	3.05393977663946e-12	5.68317290943639e-11	Solyc03g119360_3	3	69475777	69478545	-	1059	protein_coding	NA && sp|Q9ZNS1|RS7_AVIMR 40S ribosomal protein S7 OS=Avicennia marina OX=82927 GN=RPS7 PE=2 SV=1 && PF01251:Ribosomal protein S7e	MYB
Solyc01g091950_3	256.212526984789	117.400529246158	251.623865425885	610.572083798686	703.50778865299	637.301375210668	208.412307218944	650.460415887448	-1.64508271526142	3.18519988114593e-12	5.91619146804496e-11	Solyc01g091950_3	1	85356995	85373249	+	2526	protein_coding	NA && sp|Q8S8S2|LPCT2_ARATH Lysophospholipid acyltransferase LPEAT2 OS=Arabidopsis thaliana OX=3702 GN=LPEAT2 PE=1 SV=1 && PF01486:K-box region|PF13833:EF-hand domain pair|PF01553:Acyltransferase	bHLH
Solyc05g013880_1	683.66914088288	794.801582996491	942.611682398522	407.304706594584	375.889988312903	346.403055990689	807.027468759298	376.532583632725	1.10036528574448	3.20956818489303e-12	5.95016253367905e-11	Solyc05g013880_1	5	7319712	7320989	-	1278	protein_coding	NA && sp|O48716|JGB_ARATH Protein JINGUBANG OS=Arabidopsis thaliana OX=3702 GN=JGB PE=1 SV=1 && -	Dof
Solyc07g005320_3	243.140459281483	248.889122001855	267.268872602624	539.736482651802	597.467244581561	557.722294780375	253.099484628654	564.975340671246	-1.15854280996929	3.38890484586932e-12	6.27668781150271e-11	Solyc07g005320_3	7	246866	259901	-	4980	protein_coding	NA && sp|F4KDH9|FIPS5_ARATH FIP1[V]-like protein OS=Arabidopsis thaliana OX=3702 GN=FIPS5 PE=1 SV=1 && PF05182:Fip1 motif	-
Solyc01g059880_3	406.541305572803	366.289651248014	430.237697360321	118.572636702393	32.4452410964821	92.2849840284074	401.022884727046	81.1009539424275	2.30378307851601	3.39536461368136e-12	6.28270822703592e-11	Solyc01g059880_3	1	68888315	68894527	-	2471	protein_coding	NA && sp|Q9FGX1|ACLB2_ARATH ATP-citrate synthase beta chain protein 2 OS=Arabidopsis thaliana OX=3702 GN=ACLB-2 PE=1 SV=1 && PF00549:CoA-ligase|PF00285:Citrate synthase, C-terminal domain	bZIP
Solyc06g083790_3	1160.79961205353	1081.25887435712	814.844123788488	533.576865160768	288.841780493073	361.78388666209	1018.96753673305	394.734177438643	1.36840246513897	3.52750896250324e-12	6.52106165806665e-11	Solyc06g083790_3	6	49153363	49159046	+	1773	protein_coding	NA && sp|Q84LB6|SUCB_SOLLC Succinate--CoA ligase [ADP-forming] subunit beta, mitochondrial OS=Solanum lycopersicum OX=4081 PE=1 SV=1 && PF08442:ATP-grasp domain|PF00549:CoA-ligase	bHLH
Solyc08g007230_2	94.1188874637999	140.88063509539	106.90754904105	0	0	1.33746353664359	113.969023866746	0.445821178881195	7.86769152427029	3.55105196887394e-12	6.5583909806269e-11	Solyc08g007230_2	8	1811066	1811703	-	597	protein_coding	NA && sp|O80337|EF100_ARATH Ethylene-responsive transcription factor 1A OS=Arabidopsis thaliana OX=3702 GN=ERF1A PE=1 SV=2 && PF00847:AP2 domain	ERF
Solyc09g008010_3	452.293542534372	560.000524504175	479.780220086661	170.929385376177	204.167614704692	219.344020009548	497.358095708403	198.147006696806	1.32741604206411	3.96622513961573e-12	7.30449572514179e-11	Solyc09g008010_3	9	1485967	1491878	+	1853	protein_coding	NA && sp|Q9SF86|PCRK1_ARATH Serine/threonine-protein kinase PCRK1 OS=Arabidopsis thaliana OX=3702 GN=PCRK1 PE=1 SV=1 && PF07714:Protein tyrosine kinase	Whirly
Solyc07g052370_3	454.907956075033	671.531027288025	495.4252272634	176.319050680831	231.073424394458	199.282066959894	540.621403542153	202.224847345061	1.41997003450721	3.97134937392839e-12	7.30705889975528e-11	Solyc07g052370_3	7	61011322	61013390	+	1616	protein_coding	NA && sp|A6YIH8|C7D55_HYOMU Premnaspirodiene oxygenase OS=Hyoscyamus muticus OX=35626 GN=CYP71D55 PE=1 SV=1 && PF00067:Cytochrome P450	E2F/DP
Solyc09g064860_3	628.766456528997	403.857820606784	434.148949154506	1138.7592836548	1041.41310446269	987.716821811288	488.924408763429	1055.96306997626	-1.1119117295018	3.98476301447929e-12	7.3248549797616e-11	Solyc09g064860_3	9	62571662	62594210	-	5723	protein_coding	NA && sp|Q67XQ0|Y4424_ARATH DUF21 domain-containing protein At4g14240 OS=Arabidopsis thaliana OX=3702 GN=CBSDUF1 PE=1 SV=1 && PF01595:Cyclin M transmembrane N-terminal domain	C2H2
Solyc08g068390_3	474.516057629991	665.661000825717	550.182752381987	197.877711899448	169.34833157676	256.792999035568	563.453270279232	208.006347503926	1.4363154196091	4.13015157500252e-12	7.5849884975445e-11	Solyc08g068390_3	8	57579149	57584636	+	2667	protein_coding	NA && sp|Q9ZPI6|AIM1_ARATH Peroxisomal fatty acid beta-oxidation multifunctional protein AIM1 OS=Arabidopsis thaliana OX=3702 GN=AIM1 PE=1 SV=1 && PF00378:Enoyl-CoA hydratase/isomerase|PF00725:3-hydroxyacyl-CoA dehydrogenase, C-terminal domain|PF02737:3-hydroxyacyl-CoA dehydrogenase, NAD binding domain	MYB_related
Solyc06g072210_1	2.61441354066111	0	0	234.835416845648	150.355995325161	115.021864151348	0.87147118022037	166.737758774053	-7.62963697632867	4.29028803047588e-12	7.87169341824052e-11	Solyc06g072210_1	6	44642482	44643066	-	585	protein_coding	NA && sp|Q9LMU2|KTI5_ARATH Kunitz trypsin inhibitor 5 OS=Arabidopsis thaliana OX=3702 GN=KTI5 PE=2 SV=1 && PF00197:Trypsin and protease inhibitor	-
Solyc04g071990_3	332.030519663961	345.157555983705	441.971452742876	112.41301921136	76.7606923502138	137.090012505967	373.053176130181	108.75457468918	1.77509288091201	4.36566058828768e-12	8.00248476937340e-11	Solyc04g071990_3	4	59098772	59140862	-	4358	protein_coding	NA && sp|Q9SQI2|GIGAN_ARATH Protein GIGANTEA OS=Arabidopsis thaliana OX=3702 GN=GI PE=1 SV=2 && -	-
Solyc01g087820_2	198.695429090244	158.490714482314	297.25513635804	596.712944443861	584.014339736678	633.288984600738	218.147093310199	604.672089593759	-1.47323432702783	4.51091183604233e-12	8.25328233777576e-11	Solyc01g087820_2	1	82577802	82580412	+	2611	protein_coding	NA && sp|O82777|SBT3_SOLLC Subtilisin-like protease SBT3 OS=Solanum lycopersicum OX=4081 GN=sbt3 PE=1 SV=1 && PF05922:Peptidase inhibitor I9|PF00082:Subtilase family|PF17766:Fibronectin type-III domain	bHLH
Solyc02g088620_3	814.389817915936	482.51617520171	698.810320561007	296.431591755982	209.707046111409	207.975579948077	665.238771226218	238.038072605156	1.48248696890308	4.6002498880707e-12	8.40887881034175e-11	Solyc02g088620_3	2	51289258	51292469	-	1301	protein_coding	NA && sp|Q9MAB9|MUB1_ARATH Membrane-anchored ubiquitin-fold protein 1 OS=Arabidopsis thaliana OX=3702 GN=MUB1 PE=1 SV=1 && PF13881:Ubiquitin-2 like Rad60 SUMO-like	-
Solyc02g090970_1	466.672817008008	515.388323390635	305.07763994641	0	6.3307787505331	8.02478121986151	429.046260115017	4.7851866567982	6.47763258366099	4.61942408461577e-12	8.43605086795922e-11	Solyc02g090970_1	2	53061908	53062990	+	1083	protein_coding	NA && sp|Q9SND6|M3K20_ARATH Mitogen-activated protein kinase kinase kinase 20 OS=Arabidopsis thaliana OX=3702 GN=MAPKKK20 PE=1 SV=1 && PF00069:Protein kinase domain	NF-YC
Solyc01g079110_3	335.952139974953	233.627053199855	129.071309208096	30.0281352687878	28.4885043773989	50.8236143924562	232.883500794301	36.4467513462143	2.6705912629736	4.76700720467038e-12	8.69745573586505e-11	Solyc01g079110_3	1	78030556	78030966	+	411	protein_coding	NA && sp|P59226|H32_ARATH Histone H3.2 OS=Arabidopsis thaliana OX=3702 GN=HTR2 PE=1 SV=2 && PF00125:Core histone H2A/H2B/H3/H4	B3
Solyc02g091860_3	54.9026843538833	70.4403175476949	114.730052629419	262.553695555299	371.141904250003	345.734324222367	80.0243515103324	326.476641342556	-2.0298226976669	5.05148326083425e-12	9.20790389174601e-11	Solyc02g091860_3	2	53739245	53744579	+	4024	protein_coding	NA && sp|C0LGX3|HSL2_ARATH LRR receptor-like serine/threonine-protein kinase HSL2 OS=Arabidopsis thaliana OX=3702 GN=HSL2 PE=1 SV=1 && PF13855:Leucine rich repeat|PF00069:Protein kinase domain|PF08263:Leucine rich repeat N-terminal domain	MYB_related
Solyc03g119460_3	244.447666051814	331.069492474166	186.436335522806	589.013422580069	762.067492095421	676.756549541654	253.984498016262	675.945821405715	-1.4097586671195	5.24394086697615e-12	9.54982607932949e-11	Solyc03g119460_3	3	69551240	69557441	-	4066	protein_coding	NA && - && PF14304:Transcription termination and cleavage factor C-terminal|PF14327:Hinge domain of cleavage stimulation factor subunit 2	NAC
Solyc06g075930_1	247.062079592475	345.157555983705	190.347587316991	58.5163661648173	71.2212609434973	56.1734685390306	260.85574096439	61.9703652157817	2.07628845621802	5.62212632546633e-12	1.02290303971798e-10	Solyc06g075930_1	6	47287754	47288065	-	312	protein_coding	NA && sp|Q71V09|H4_CAPAN Histone H4 OS=Capsicum annuum OX=4072 PE=3 SV=3 && PF15511:Centromere kinetochore component CENP-T histone fold	CO-like
Solyc01g091220_3	539.876396146519	550.608482164482	564.524008960664	266.403456487195	155.104079388061	193.93221281332	551.669629090555	205.146582896192	1.42717483773501	5.87063446979558e-12	1.06613553817429e-10	Solyc01g091220_3	1	84773603	84775594	-	575	protein_coding	NA && sp|P62302|RS13_SOYBN 40S ribosomal protein S13 OS=Glycine max OX=3847 GN=RPS13 PE=2 SV=1 && PF00312:Ribosomal protein S15|PF08069:Ribosomal S13/S15 N-terminal domain	TCP
Solyc03g115370_3	239.218838970492	201.928910303392	228.156354660776	43.1173224372338	64.8904821929642	55.5047367707088	223.10136797822	54.5041804669689	2.03307764676729	6.16103253946584e-12	1.11783627456092e-10	Solyc03g115370_3	3	66578213	66586276	+	3062	protein_coding	NA && sp|Q39017|DGK1_ARATH Diacylglycerol kinase 1 OS=Arabidopsis thaliana OX=3702 GN=DGK1 PE=1 SV=2 && PF00781:Diacylglycerol kinase catalytic domain|PF00130:Phorbol esters/diacylglycerol binding domain (C1 domain)|PF00609:Diacylglycerol kinase accessory domain	-
Solyc08g083110_3	155.557605669336	82.1803704723108	88.6550406681874	0	9.49616812579964	2.67492707328717	108.797672269945	4.05703173302894	4.76202419895416	6.51590279831096e-12	1.18003542167006e-10	Solyc08g083110_3	8	65791078	65791524	+	447	protein_coding	NA && sp|Q9SGU9|MGL_ARATH Methionine gamma-lyase OS=Arabidopsis thaliana OX=3702 GN=MGL PE=1 SV=1 && PF01053:Cys/Met metabolism PLP-dependent enzyme	-
Solyc08g082820_3	662.753832557591	474.298138154479	559.309006568418	242.53493870944	246.109023926974	223.356410619479	565.453659093496	237.333457751964	1.25227624005287	6.6770852481987e-12	1.20810811371521e-10	Solyc08g082820_3	8	65610083	65614370	+	2421	protein_coding	NA && sp|P49118|BIP_SOLLC Luminal-binding protein OS=Solanum lycopersicum OX=4081 PE=2 SV=1 && PF00012:Hsp70 protein	GATA
Solyc10g009360_3	180.394534305617	196.058883841084	157.753822365451	19.2488046594794	38.7760198470152	10.0309765248269	178.069080170717	22.6852670104405	2.98324433299463	6.922337991426e-12	1.25132604670496e-10	Solyc10g009360_3	10	3412655	3414531	-	1222	protein_coding	NA && sp|Q9ZPY0|DOF25_ARATH Dof zinc finger protein DOF2.5 OS=Arabidopsis thaliana OX=3702 GN=DOF2.5 PE=2 SV=3 && PF02701:Dof domain, zinc finger	Dof
Solyc05g051000_3	688.897967964202	460.21007464494	443.275203340937	216.356564372548	164.60024751386	120.371718297923	530.794415316693	167.109510061444	1.66881564041361	7.38612329290821e-12	1.33393114119247e-10	Solyc05g051000_3	5	62054207	62057393	-	824	protein_coding	NA && sp|P62302|RS13_SOYBN 40S ribosomal protein S13 OS=Glycine max OX=3847 GN=RPS13 PE=2 SV=1 && PF00312:Ribosomal protein S15|PF08069:Ribosomal S13/S15 N-terminal domain	TCP
[truncated: 2,741 more rows]
