# Supplementary material for: Multi-omics analysis reveals the specific role of biocontrol reagents against tomato bacterial wilt
Source: Front Plant Sci. 2025 Jul 14;16:1620460. doi: 10.3389/fpls.2025.1620460 (PMC12301371; doi:10.3389/fpls.2025.1620460)
Supplement: Supplementary file 3 [file Table3.xlsx]

## Sheet: sheet1
ID	MS2 name	MS2 score	level	MS1 name	MS1 ppm	mz	rt	type	Formula	HMDB	CAS	KEGG COMPOUND ID	Super.Class	Class	Sub.Class	INCHIKEY	CK_1	CK_2	CK_3	MEAN CK	Treat_1	Treat_2	Treat_3	MEAN Treat	VIP	P-Value	Q-Value	Fold_Change	Log_Foldchange
1	Serine	4	level1			104.035	42.4	NEG	C3H7NO3	HMDB0000187	56-45-1	C00065	Amino acids and Peptides	Small peptides	Aminoacids	MTCFGRXMJLQNBG-REOHCLBHSA-N	0.162959	0.163055	0.173902	0.166638	0.238463	0.238012	0.255242	0.243905	1.32334	0.000329136	0.00349003	1.46368	0.549602
3	Phthalic acid	3.99	level1			165.019	229.1	NEG	C8H6O4	HMDB0002107	88-99-3	C01606	Shikimates and Phenylpropanoids	Phenolic acids (C6-C1)	Simple phenolic acids	XNGIFLGASWRNHJ-UHFFFAOYSA-N	0.358811	0.39325	0.379967	0.377343	0.593541	0.553247	0.545502	0.564097	1.3188	0.000482274	0.00438679	1.49492	0.580068
4	Dihydroxyacetone	3.99	level1			89.0244	50.1	NEG	C3H6O3	HMDB0001882	96-26-4	C00184	Carbohydrates	Saccharides	Monosaccharides	RXKJFZQQPQGTFL-UHFFFAOYSA-N	3.77227	3.72072	3.56494	3.68598	1.8919	1.89862	1.76257	1.85103	1.33651	1.78689e-05	0.000811891	0.502181	-0.99372
5	Valine	3.99	level1			116.072	47	NEG	C5H11NO2	HMDB0000883	72-18-4	C00183	Amino acids and Peptides	Small peptides	Aminoacids	KZSNJWFQEVHDMF-BYPYZUCNSA-N	0.665947	0.70424	0.705484	0.69189	1.07988	1.08231	0.958798	1.04033	1.31089	0.00123718	0.00794619	1.5036	0.588424
6	Glyceraldehyde	3.98	level1			89.0244	50.1	NEG	C3H6O3	HMDB0001051	56-82-6	C02154	Carbohydrates	Saccharides	Monosaccharides	MNQZXJOMYWMBOU-UHFFFAOYSA-N	3.77227	3.72072	3.56494	3.68598	1.8919	1.89862	1.76257	1.85103	1.33651	1.78689e-05	0.000811891	0.502181	-0.99372
10	Phenol	3.98	level1			93.0345	282.6	NEG	C6H6O	HMDB0000228	108-95-2	C00146	Shikimates and Phenylpropanoids			ISWSIDIOOBJBQZ-UHFFFAOYSA-N	0.104149	0.109569	0.101198	0.104972	0.080981	0.0871136	0.080254	0.0827829	1.28669	0.00248369	0.012499	0.788622	-0.342594
11	Eleutheroside E	3.98	level1			741.261	252.4	NEG	C34H46O18	HMDB0036410	573-44-4		Shikimates and Phenylpropanoids	Lignans	Furofuranoid lignans	FFDULTAFAQRACT-UHFFFAOYSA-N	0.304088	0.33953	0.315982	0.319867	0.200427	0.205993	0.198845	0.201755	1.32688	0.000374233	0.00376723	0.630746	-0.664869
12	Chlorogenic acid	3.98	level1			353.088	235.2	NEG	C16H18O9	HMDB0003164	327-97-9	C00852	Shikimates and Phenylpropanoids	Phenylpropanoids (C6-C3)	Cinnamic acids and derivatives	CWVRJTMFETXNAD-JUHZACGLSA-N	0.13038	0.132845	0.111517	0.124914	2.27082	2.04625	2.49753	2.27153	1.33945	0.00358904	0.015971	18.1847	4.18466
14	Dinotefuran	3.98	level1			201.099	217.4	NEG	C7H14N4O3	HMDB0244741	165252-70-0	C18509				YKBZOVFACRVRJN-UHFFFAOYSA-N	0.193223	0.21222	0.200877	0.202107	0.0181026	0.0199454	0.0170808	0.0183763	1.34014	0.000710074	0.00557548	0.0909236	-3.4592
19	D-Mannoheptulose	3.98	level1			209.066	44	NEG	C7H14O7				Carbohydrates	Saccharides	Monosaccharides	HSNZZMHEPUFJNZ-QMTIVRBISA-N	0.198149	0.227085	0.228833	0.218022	0.380252	0.387999	0.377297	0.381849	1.32281	9.66453e-05	0.00179513	1.75142	0.808528
20	Glycerophosphoethanolamine	3.98	level1			214.049	42.6	NEG	C5H14NO6P	HMDB0059660	1190-00-7	C01233				JZNWSCPGTDBMEW-YFKPBYRVSA-N	0.161932	0.163626	0.161836	0.162465	0.196278	0.19364	0.2042	0.198039	1.32345	0.000384366	0.00382105	1.21897	0.285661
21	Asparagine	3.98	level1			131.046	42	NEG	C4H8N2O3	HMDB0000168	70-47-3	C00152	Amino acids and Peptides	Small peptides	Aminoacids	DCXYFEDJOCDNAF-REOHCLBHSA-N	1.41276	1.45703	1.46724	1.44568	2.19113	2.17887	2.08601	2.152	1.33518	4.51278e-05	0.00122419	1.48858	0.573933
22	trans-2-Octenoic acid	3.98	level1			141.092	55.9	NEG	C8H14O2	HMDB0001568	1871-67-6		Fatty acids	Fatty Acids and Conjugates	Unsaturated fatty acids	CWMPPVPFLSZGCY-VOTSOKGWSA-N	0.0554805	0.0749677	0.064366	0.064938	0.0457209	0.0489416	0.0376236	0.0440954	1.14551	0.0336592	0.0799052	0.679038	-0.558436
23	Salicylic acid	3.98	level1			137.024	35.7	NEG	C7H6O3	HMDB0001895	69-72-7	C00805	Shikimates and Phenylpropanoids	Phenolic acids (C6-C1)	Simple phenolic acids	YGSDEFSMJLZEOE-UHFFFAOYSA-N	0.549432	0.493628	0.529363	0.524141	0.399626	0.377004	0.404813	0.393814	1.29612	0.00210488	0.0112162	0.751351	-0.412441
25	Syringaresinol diglucoside	3.97	level1			741.261	252.4	NEG	C34H46O18		66791-77-3	C10543	Shikimates and Phenylpropanoids	Lignans	Furofuranoid lignans	FFDULTAFAQRACT-NYYYOYJKSA-N	0.304088	0.33953	0.315982	0.319867	0.200427	0.205993	0.198845	0.201755	1.32688	0.000374233	0.00376723	0.630746	-0.664869
27	Nonadecanoic acid	3.97	level1			297.279	597.3	NEG	C19H38O2	HMDB0000772	646-30-0	C16535	Fatty acids	Fatty Acids and Conjugates	Unsaturated fatty acids	ISYWECDDZWTKFF-UHFFFAOYSA-N	0.170478	0.190093	0.186938	0.182503	0.308673	0.288198	0.341814	0.312895	1.30905	0.00147285	0.00889027	1.71446	0.777758
28	Tetradecyl sulfate (sodium)	3.97	level1			293.179	592.1	NEG	C14H30O4S	HMDB0014607	1191-50-0		Fatty acids	Fatty acyls	Fatty alcohols	URLJMZWTXZTZRR-UHFFFAOYSA-N	0.0920536	0.0903875	0.0914545	0.0912985	0.082117	0.0794855	0.0853837	0.0823287	1.24107	0.00720193	0.0258046	0.901753	-0.149196
35	5-Hydroxyvalproic acid	3.97	level1			159.102	297.6	NEG	C8H16O3	HMDB0013898	53660-23-4	C16650	Fatty acids	Fatty Acids and Conjugates	Hydroxy fatty acids	ZIWBCJXKYKOLJK-UHFFFAOYSA-N	0.120077	0.139068	0.126774	0.12864	0.103592	0.1029	0.0995083	0.102	1.25065	0.0095068	0.0314596	0.792915	-0.334762
36	3-hydroxybenzaldehyde	3.97	level1			121.029	269.6	NEG	C7H6O2		100-83-4	C03067	Shikimates and Phenylpropanoids	Phenolic acids (C6-C1)	Shikimic acids and derivatives	IAVREABSGIHHMO-UHFFFAOYSA-N	0.542115	0.485584	0.576515	0.534738	0.637287	0.59222	0.64338	0.624295	1.08619	0.0447406	0.0992185	1.16748	0.223397
38	1-[2,3-dihydroxy-4-[(2S,3R,4S,5S,6R)-3,4,5-trihydroxy-6-(hydroxymethyl)tetrahydropyran-2-yl]oxy-phenyl]ethanone	3.97	level1			329.088	221.3	NEG	C14H18O9		1631711-77-7		Polyketides	Phloroglucinols	Acyl phloroglucinols	IYOWHSWFFIPSDK-LNNRFACYSA-N	0.190937	0.212546	0.196219	0.199901	0.333572	0.341387	0.320183	0.331714	1.32745	0.000125314	0.00205046	1.65939	0.730656
39	gamma-Glutamylleucine	3.97	level1			259.13	215.6	NEG	C11H20N2O5	HMDB0011171	2566-39-4		Amino acids and Peptides	Small peptides	Dipeptides	MYFMARDICOWMQP-YUMQZZPRSA-N	0.956404	1.08227	0.995466	1.01138	4.83031	3.25197	4.6242	4.23549	1.31904	0.0222871	0.0584941	4.18783	2.0662
41	Pantothenic acid	3.97	level1			218.103	185.6	NEG	C9H17NO5	HMDB0000210	79-83-4	C00864	Amino acids and Peptides	Small peptides	Dipeptides	GHOKWGTUZJEAQD-ZETCQYMHSA-N	1.44905	1.80961	2.134	1.79755	3.36989	2.88334	3.0599	3.10438	1.22983	0.00583061	0.0222894	1.727	0.788268
43	Glutaric acid	3.97	level1			131.035	105.3	NEG	C5H8O4	HMDB0000661	110-94-1	C00489	Fatty acids	Fatty Acids and Conjugates	Dicarboxylic acids	JFCQEDHGNNZCLN-UHFFFAOYSA-N	0.302081	0.352965	0.317405	0.32415	0.181548	0.162832	0.159342	0.167907	1.31895	0.000705812	0.0055532	0.517992	-0.948999
44	Levulinic acid	3.97	level1			115.04	97	NEG	C5H8O3	HMDB0000720	123-76-2		Fatty acids	Fatty Acids and Conjugates	Oxo fatty acids	JOOXCMJARBKPKM-UHFFFAOYSA-N	0.400591	0.44179	0.450268	0.430883	0.493248	0.48752	0.482776	0.487848	1.15731	0.0219133	0.0577627	1.1322	0.179135
45	N-Acetylmuramic acid	3.97	level1			292.104	78.2	NEG	C11H19NO8	HMDB0060493	2245794-62-9	C02713	Carbohydrates	Aminosugars and aminoglycosides	Aminosugars	MNLRQHMNZILYPY-MKFCKLDKSA-N	0.0207851	0.020763	0.0187577	0.0201019	0.042932	0.0397859	0.0430602	0.041926	1.33247	6.60728e-05	0.0014736	2.08567	1.06051
46	2,2'-Iminodiacetic acid	3.97	level1			132.03	56.9	NEG	C4H7NO4	HMDB0011753	142-73-4	C19911	Amino acids and Peptides	Small peptides	Aminoacids	NBZBKCUXIYYUSX-UHFFFAOYSA-N	0.467661	0.477214	0.496815	0.480563	0.440329	0.426098	0.448895	0.43844	1.19552	0.0178355	0.0496105	0.912347	-0.132346
48	Homoserine	3.97	level1			118.051	43.4	NEG	C4H9NO3	HMDB0000719	672-15-1	C00263	Amino acids and Peptides	Small peptides	Aminoacids	UKAUYVFTDYCKQA-VKHMYHEASA-N	0.197821	0.196007	0.212708	0.202178	0.166128	0.177276	0.154679	0.166028	1.21089	0.0126036	0.0385345	0.821193	-0.284206
49	Pyroglutamic acid	3.97	level1			128.035	318	NEG	C5H7NO3	HMDB0000267	98-79-3	C01879	Amino acids and Peptides	Small peptides	Aminoacids	ODHCTXKNWHHXJC-VKHMYHEASA-N	2.39913	2.44529	2.55619	2.46687	3.42714	3.47856	3.143	3.34956	1.30425	0.00151269	0.00904533	1.35782	0.441292
50	(1R,2S,6S,9S,10R,11R,14S,15S,18S,20S,23R,24S)-6,10,23-trimethyl-20-[(2R,3R,4S,5S,6R)-3,4,5-trihydroxy-6-(hydroxymethyl)tetrahydropyran-2-yl]oxy-4-azahexacyclo[12.11.0.02,11.04,9.015,24.018,23]pentacosan-17-one	3.97	level1			576.389	308.9	POS	C33H53NO7		98985-24-1		Alkaloids	Pseudoalkaloids	Steroidal alkaloids	BSSXNTZKMOAXRA-MXXYQIINSA-N	0.00349716	0.00604874	0.00503884	0.00486158	0.0174488	0.0216091	0.0177749	0.0189443	1.30063	0.000770037	0.00586738	3.89673	1.96227
51	Lactate	3.97	level1			89.0243	244.9	NEG	C3H6O3	HMDB0144295	50-21-5	C01432	Fatty acids	Fatty Acids and Conjugates	Hydroxy fatty acids	JVTAAEKCZFNVCJ-UHFFFAOYSA-N	3.06471	3.05432	3.15972	3.09292	1.8142	1.80982	1.68928	1.7711	1.33582	1.52456e-05	0.000764019	0.572631	-0.804322
52	LPE(18:1(9Z)/0:0)	3.97	level1			478.294	222.8	NEG	C23H46NO7P	HMDB0011506	89576-29-4		Fatty acids	Glycerophospholipids	Glycerophosphoethanolamines	PYVRVRFVLRNJLY-MZMPXXGTSA-N	0.022899	0.0259382	0.0145764	0.0211379	0.0463839	0.0668605	0.0525896	0.055278	1.23775	0.00796734	0.0277134	2.61512	1.38687
53	p-Toluquinone	3.97	level1			121.029	123.5	NEG	C7H6O2		553-97-9		Polyketides	Aromatic polyketides	Benzoquinones	VTWDKFNVVLAELH-UHFFFAOYSA-N	1.9503	2.19151	2.00994	2.05058	4.06643	4.1089	3.84551	4.00695	1.33192	5.70742e-05	0.00137146	1.95405	0.966469
54	Arjunolic acid	3.97	level1			487.342	76.6	NEG	C30H48O5		465-00-9		Terpenoids	Triterpenoids	Oleanane triterpenoids	RWNHLTKFBKYDOJ-DDHMHSPCSA-N	0.095256	0.126239	0.111251	0.110915	1.54615	1.5464	2.11449	1.73568	1.3353	0.0131683	0.0397561	15.6487	3.96797
59	Linoleic acid	3.96	level1			279.232	551.5	NEG	C18H32O2	HMDB0000673	60-33-3	C01595	Fatty acids	Fatty Acids and Conjugates	Unsaturated fatty acids	OYHQOLUKZRVURQ-HZJYTTRNSA-N	52.9432	55.2147	53.6059	53.9213	66.4627	66.1748	68.2674	66.9683	1.32745	0.000156234	0.00231082	1.24196	0.312623
60	cis-9-Palmitoleic acid	3.96	level1			253.217	547.2	NEG	C16H30O2	HMDB0003229	373-49-9	C08362	Fatty acids	Fatty Acids and Conjugates	Unsaturated fatty acids	SECPZKHBENQXJG-FPLPWBNLSA-N	3.37901	3.8642	3.69205	3.64509	4.84225	6.34431	5.62911	5.60523	1.24148	0.0127008	0.038744	1.53775	0.620819
61	Docosahexaenoic acid (DHA)	3.96	level1			327.233	539.2	NEG	C22H32O2	HMDB0002183	6217-54-5	C06429	Fatty acids	Fatty Acids and Conjugates	Unsaturated fatty acids	MBMBGCFOFBJSGT-UHFFFAOYSA-N	0.0406027	0.0522475	0.0557043	0.0495181	0.0175112	0.0211313	0.0181299	0.0189241	1.30566	0.00288114	0.0138038	0.382166	-1.38773
67	(4aR,5R,6aR,6aS,6bR,8aR,9R,10S,12aR,14bS)-5,10-dihydroxy-9-(hydroxymethyl)-2,2,6a,6b,9,12a-hexamethyl-1,3,4,5,6,6a,7,8,8a,10,11,12,13,14b-tetradecahydropicene-4a-carboxylic acid	3.96	level1			487.342	448.3	NEG	C30H48O5		52936-64-8		Terpenoids	Triterpenoids	Oleanane triterpenoids	FABOBEOYNMHSHB-UAWZMHPWSA-N	0.0294846	0.0491338	0.0245851	0.0344012	2.02795	1.39271	2.84707	2.08924	1.32804	0.03946	0.0901502	60.7317	5.92438
69	[(2R,3R,4R,8S,10R,11R)-2,3,11-trihydroxy-4,6,6,10-tetramethyl-8-tricyclo[5.3.1.04,11]undecanyl] acetate	3.96	level1			311.186	317.9	NEG	C17H28O5				Terpenoids	Sesquiterpenoids	Presilphiperfolane and Probotryane sesquiterpenoids	XEUSNZUHUUORTO-PEBXEEOJSA-N	0.0131344	0.0189458	0.0128832	0.0149878	0.0764019	0.0746087	0.0704948	0.0738352	1.32507	2.40456e-05	0.000923453	4.92635	2.30052
70	Valeric acid	3.96	level1			101.061	304.1	NEG	C5H10O2	HMDB0000892	109-52-4	C00803	Fatty acids	Fatty Acids and Conjugates	Branched fatty acids	NQPDZGIKBAWPEJ-UHFFFAOYSA-N	0.108649	0.127765	0.114084	0.116833	0.172363	0.186297	0.18438	0.181013	1.3033	0.000859858	0.00628294	1.54933	0.631646
71	(3R,4R)-4-[(4-hydroxy-3-methoxy-phenyl)methyl]-3-[[3-methoxy-4-[(2S,3R,4S,5S,6R)-3,4,5-trihydroxy-6-(hydroxymethyl)tetrahydropyran-2-yl]oxy-phenyl]methyl]tetrahydrofuran-2-one	3.96	level1			519.187	282.7	NEG	C26H32O11		23202-85-9		Shikimates and Phenylpropanoids	Lignans	Dibenzylbutyrolactone lignans	AAGCATAPYOEULE-LHHMAMHXSA-N	0.117139	0.13329	0.128268	0.126232	0.094229	0.093693	0.0958621	0.0945947	1.29478	0.0203991	0.0547786	0.74937	-0.416249
72	Acetylleucine	3.96	level1			172.098	265.4	NEG	C8H15NO3	HMDB0011756	1188-21-2	C02710	Amino acids and Peptides	Small peptides	Dipeptides	WXNXCEHXYPACJF-ZETCQYMHSA-N	0.233655	0.26433	0.253047	0.250344	0.334888	0.340615	0.288201	0.321235	1.19146	0.0198039	0.0536091	1.28317	0.359715
73	1-[2,4-dihydroxy-6-[(2S,3R,4S,5S,6R)-3,4,5-trihydroxy-6-(hydroxymethyl)tetrahydropyran-2-yl]oxy-phenyl]ethanone	3.96	level1			329.088	233.8	NEG	C14H18O9		26089-54-3		Polyketides	Phloroglucinols	Acyl phloroglucinols	GFKQVLKFPJGJEP-RGCYKPLRSA-N	0.0531495	0.0584432	0.0619579	0.0578502	0.0794157	0.0806797	0.0689549	0.0763501	1.20775	0.0148523	0.043368	1.31979	0.400307
74	L-Valyl-L-phenylalanine	3.96	level1			263.14	225.2	NEG	C14H20N2O3	HMDB0029134	3918-92-1		Amino acids and Peptides	Small peptides	Dipeptides	GJNDXQBALKCYSZ-RYUDHWBXSA-N	0.44703	0.477788	0.435953	0.45359	0.688388	0.642419	0.737998	0.689602	1.30665	0.00146577	0.00886284	1.52032	0.604374
76	1-[3-hydroxy-4-[(2S,3R,4S,5S,6R)-3,4,5-trihydroxy-6-(hydroxymethyl)tetrahydropyran-2-yl]oxy-phenyl]ethanone	3.96	level1			313.093	209.6	NEG	C14H18O8		17063-43-3					DDMBYMQDYQAZRZ-RKQHYHRCSA-N	0.159306	0.157577	0.162127	0.15967	0.274181	0.274809	0.258541	0.269177	1.33694	3.71084e-05	0.00112163	1.68583	0.75346
77	N-Acetylmethionine	3.96	level1			190.054	205.9	NEG	C7H13NO3S	HMDB0011745	65-82-7	C02712	Amino acids and Peptides	Small peptides	Dipeptides	XUYPXLNMDZIRQH-LURJTMIESA-N	0.0892617	0.0863482	0.0898072	0.0884724	0.167712	0.171082	0.151958	0.163584	1.33106	0.000232856	0.00285279	1.84898	0.886733
78	Aspartylphenylalanine	3.96	level1			279.099	203.5	NEG	C13H16N2O5	HMDB0000706	13433-09-5		Amino acids and Peptides	Small peptides	Dipeptides	YZQCXOFQZKCETR-UWVGGRQHSA-N	0.101469	0.101343	0.10581	0.102874	0.129833	0.12856	0.117406	0.125266	1.26335	0.00601941	0.022779	1.21766	0.284114
80	gamma-Glutamylvaline	3.96	level1			245.114	97.1	NEG	C10H18N2O5	HMDB0011172			Amino acids and Peptides	Small peptides	Dipeptides	AQAKHZVPOOGUCK-UHFFFAOYSA-N	0.166974	0.185809	0.169922	0.174235	0.500202	0.510529	0.487639	0.499457	1.33853	3.24823e-06	0.000426289	2.86657	1.51933
81	Oxypurinol	3.96	level1			151.026	87.9	NEG	C5H4N4O2	HMDB0000786	2465-59-0	C07599	Alkaloids	Pseudoalkaloids	pteridine alkaloids	HXNFUBHNUDHIGC-UHFFFAOYSA-N	0.241015	0.276125	0.243592	0.253578	0.210305	0.196764	0.199802	0.20229	1.23313	0.0129829	0.0393698	0.797744	-0.326002
85	Allantoin	3.96	level1			157.036	44	NEG	C4H6N4O3	HMDB0000462	97-59-6	C01551	Alkaloids	Pseudoalkaloids	Purine alkaloids	POJWUDADGALRAB-UHFFFAOYSA-N	0.149676	0.170931	0.156382	0.158996	0.319264	0.321142	0.3187	0.319702	1.33328	0.0013366	0.00835711	2.01075	1.00774
86	Glutamate	3.96	level1			146.046	415.1	NEG	C5H9NO4	HMDB0000148	56-86-0	C00025	Amino acids and Peptides	Small peptides	Aminoacids	WHUUTDBJXJRKMK-VKHMYHEASA-N	1.07603	1.11043	1.13586	1.10744	2.43238	2.40704	2.22302	2.35415	1.33656	5.27031e-05	0.00132482	2.12576	1.08798
87	4-Hydroxyisoleucine	3.96	level1			128.071	327.9	NEG	C6H13NO3	HMDB0029449	781658-23-9	C20802	Amino acids and Peptides	Small peptides	Aminoacids	OSCCDBFHNMXNME-DSDZBIDZSA-N	0.243247	0.241375	0.244765	0.243129	0.501018	0.500859	0.447892	0.483256	1.33359	0.00526672	0.0207812	1.98766	0.991068
88	3'-O-Methylguanosine	3.96	level1			298.114	216.7	POS	C11H15N5O5	HMDB0006038	10300-27-3		Carbohydrates	Nucleosides	Purine nucleos(t)ides	UYARPHAXAJAZLU-KQYNXXCUSA-N	0.00719849	0.00739046	0.00751884	0.00736926	0.0101064	0.00917063	0.00836396	0.00921367	1.19544	0.0227096	0.0592996	1.25028	0.322256
89	Peimine	3.96	level1			414.336	209	POS	C27H45NO3		23496-41-5	C10830	Alkaloids	Pseudoalkaloids	Steroidal alkaloids	IUKLSMSEHKDIIP-BZMYINFQSA-N	0.0188988	0.020023	0.0221676	0.0203631	0.0528305	0.0507527	0.044259	0.0492807	1.32442	0.00046498	0.00428826	2.4201	1.27506
90	Phe-Val	3.96	level1			265.154	205.3	POS	C14H20N2O3	HMDB0029008	3918-90-9		Amino acids and Peptides	Small peptides	Dipeptides	IEHDJWSAXBGJIP-RYUDHWBXSA-N	0.0788575	0.0718459	0.0754091	0.0753708	0.126025	0.125903	0.112213	0.12138	1.31611	0.000781238	0.0059203	1.61044	0.687456
91	Leucylphenylalanine	3.96	level1			277.155	192.5	NEG	C15H22N2O3	HMDB0013243	3063-05-6		Amino acids and Peptides	Small peptides	Dipeptides	KFKWRHQBZQICHA-STQMWFEESA-N	0.383052	0.396645	0.387853	0.389184	0.336696	0.35326	0.336416	0.342124	1.28574	0.00234448	0.0120292	0.879081	-0.185932
92	Phe-Leu	3.96	level1			277.155	192.5	NEG	C15H22N2O3	HMDB0253025	3303-55-7		Amino acids and Peptides	Small peptides	Dipeptides	RFCVXVPWSPOMFJ-STQMWFEESA-N	0.383052	0.396645	0.387853	0.389184	0.336696	0.35326	0.336416	0.342124	1.28574	0.00234448	0.0120292	0.879081	-0.185932
95	Isocaproic acid	3.96	level1			115.076	73.3	NEG	C6H12O2	HMDB0000689	646-07-1	C21399	Fatty acids	Fatty Acids and Conjugates	Branched fatty acids	FGKJLKRYENPLQH-UHFFFAOYSA-N	0.893579	1.04674	0.973665	0.971327	0.728039	0.730978	0.707503	0.722173	1.27813	0.00513529	0.0204353	0.743492	-0.427612
96	Echinocystic acid	3.96	level1			471.347	51.4	NEG	C30H48O4		510-30-5	C08942	Terpenoids	Triterpenoids	Oleanane triterpenoids	YKOPWPOFWMYZJZ-PRIAQAIDSA-N	0.0166351	0.00779718	0.00808514	0.0108391	0.125662	0.158361	0.210188	0.164737	1.31331	0.0233408	0.0604992	15.1983	3.92584
97	Corosolic acid	3.96	level1			471.347	51.4	NEG	C30H48O4	HMDB0304746	4547-24-4		Terpenoids	Triterpenoids	Ursane and Taraxastane triterpenoids	HFGSQOYIOKBQOW-ZSDYHTTISA-N	0.0166351	0.00779718	0.00808514	0.0108391	0.125662	0.158361	0.210188	0.164737	1.31331	0.0233408	0.0604992	15.1983	3.92584
98	Maleic acid	3.96	level1			115.004	50.8	NEG	C4H4O4	HMDB0000176	110-16-7	C01384	Fatty acids	Fatty Acids and Conjugates	Dicarboxylic acids	VZCYOOQTPOCHFL-UPHRSURJSA-N	0.586097	0.718339	0.660149	0.654862	0.152628	0.114767	0.299916	0.189103	1.22841	0.00240657	0.0122369	0.288769	-1.79201
99	Lufenuron	3.96	level1			508.971	32.3	NEG	C17H8Cl2F8N2O3	HMDB0254195	103055-07-8	C18434	Alkaloids			PWPJGUXAGUPAHP-UHFFFAOYSA-N	6.85639	8.8232	7.61245	7.76401	0.145386	0.161165	0.126628	0.144393	1.33971	0.00559229	0.021646	0.0185977	-5.74873
100	2,6-Dihydroxybenzoic acid	3.96	level1			153.019	25.8	NEG	C7H6O4	HMDB0013676	303-07-1	C21298	Shikimates and Phenylpropanoids	Phenolic acids (C6-C1)	Simple phenolic acids	AKEUNCKRJATALU-UHFFFAOYSA-N	2.19069	1.82199	1.94479	1.98582	0.549038	0.49632	0.731322	0.592227	1.31316	0.000425061	0.00405834	0.298227	-1.74552
101	Cholesteryl sulfate	3.96	level1			465.304	25.2	NEG	C27H46O4S	HMDB0000653	1256-86-6	C18043	Terpenoids	Steroids	Cholestane steroids	BHYOQNUELFTYRT-DPAQBDIFSA-N	1.816	2.00343	1.62223	1.81389	0.859069	0.981107	0.872148	0.904108	1.3116	0.00145805	0.0088335	0.498436	-1.00452
102	4-(Methylamino)butanoic acid	3.95	level1			116.072	47	NEG	C5H11NO2		1119-48-8	C15987	Amino acids and Peptides	Small peptides	Aminoacids	AOKCDAVWJLOAHG-UHFFFAOYSA-N	0.665947	0.70424	0.705484	0.69189	1.07988	1.08231	0.958798	1.04033	1.31089	0.00123718	0.00794619	1.5036	0.588424
106	(1S,2R,4aS,6aS,6bR,9R,10R,11R,12aR)-10,11-dihydroxy-9-(hydroxymethyl)-1,2,6a,6b,9,12a-hexamethyl-2,3,4,5,6,6a,7,8,8a,10,11,12,13,14b-tetradecahydro-1H-picene-4a-carboxylic acid	3.95	level1			487.342	448.3	NEG	C30H48O5		464-92-6		Terpenoids	Triterpenoids	Ursane and Taraxastane triterpenoids	JXSVIVRDWWRQRT-BEELBYNOSA-N	0.0294846	0.0491338	0.0245851	0.0344012	2.02795	1.39271	2.84707	2.08924	1.32804	0.03946	0.0901502	60.7317	5.92438
107	Euscaphic acid	3.95	level1			487.342	448.3	NEG	C30H48O5	HMDB0036651	53155-25-2	C17890	Terpenoids	Triterpenoids	Ursane and Taraxastane triterpenoids	OXVUXGFZHDKYLS-QUFHAEKXSA-N	0.0294846	0.0491338	0.0245851	0.0344012	2.02795	1.39271	2.84707	2.08924	1.32804	0.03946	0.0901502	60.7317	5.92438
108	(1S,2R,4aS,6aS,6bR,10S,11R,12aR,14bS)-10,11-dihydroxy-1,2,6a,6b,9,9,12a-heptamethyl-2,3,4,5,6,6a,7,8,8a,10,11,12,13,14b-tetradecahydro-1H-picene-4a-carboxylic acid	3.95	level1			471.347	51.4	NEG	C30H48O4				Terpenoids	Triterpenoids	Ursane and Taraxastane triterpenoids	HFGSQOYIOKBQOW-JIOZQPJLSA-N	0.0166351	0.00779718	0.00808514	0.0108391	0.125662	0.158361	0.210188	0.164737	1.31331	0.0233408	0.0604992	15.1983	3.92584
109	Anemosapogenin	3.95	level1			471.347	51.4	NEG	C30H48O4	HMDB0245637	85999-40-2		Terpenoids	Triterpenoids	Lupane triterpenoids	HXWLKAXCQLXHML-UHFFFAOYSA-N	0.0166351	0.00779718	0.00808514	0.0108391	0.125662	0.158361	0.210188	0.164737	1.31331	0.0233408	0.0604992	15.1983	3.92584
110	(E)-5-(1,2,4a,5-tetramethyl-2,3,4,7,8,8a-hexahydronaphthalen-1-yl)-3-methyl-pent-2-enoic acid	3.95	level1			303.233	545.9	NEG	C20H32O2				Terpenoids	Diterpenoids	Colensane and Clerodane diterpenoids	NLVMTSRTOGOFQD-BUHFOSPRSA-N	1.69171	2.02185	1.94915	1.88757	2.53506	2.49323	2.44727	2.49185	1.24803	0.00426175	0.0179453	1.32014	0.40069
111	18α-Glycyrrhetinic acid	3.95	level1			469.332	499.3	NEG	C30H46O4	HMDB0244828	1449-05-4		Terpenoids	Triterpenoids	Oleanane triterpenoids	MPDGHEJMBKOTSU-UHFFFAOYSA-N	1.17468e-05	1.2935e-05	1.24167e-05	1.23661e-05	0.0200178	0.0348363	0.022695	0.0258497	1.34027	0.0297559	0.072814	2090.36	11.0295
113	Hexadecanedioic acid	3.95	level1			285.207	471.8	NEG	C16H30O4	HMDB0000672	505-54-4	C19615	Fatty acids	Fatty Acids and Conjugates	Dicarboxylic acids	QQHJDPROMQRDLA-UHFFFAOYSA-N	0.0383775	0.0423864	0.0431828	0.0413156	0.0581924	0.0548368	0.0491963	0.0540752	1.21984	0.0133733	0.040191	1.30883	0.38828
115	3-Hydroxydecanoic acid	3.95	level1			187.134	413.1	NEG	C10H20O3	HMDB0002203	19526-23-9		Fatty acids	Fatty Acids and Conjugates	Hydroxy fatty acids	FYSSBMZUBSBFJL-VIFPVBQESA-N	0.0551883	0.0588545	0.0570573	0.0570334	0.0707606	0.078294	0.0720045	0.0736864	1.29092	0.00288421	0.0138108	1.29199	0.369591
117	3a,8-dihydroxy-3,5a,9-trimethyl-4,5,6,7,8,9b-hexahydro-3H-benzo[g]benzofuran-2-one	3.95	level1			265.144	306.7	NEG	C15H22O4				Terpenoids	Sesquiterpenoids	Eudesmane sesquiterpenoids	NVXJDQXVTHYURW-UHFFFAOYSA-N	0.0394021	0.0453711	0.0419872	0.0422535	0.171966	0.172117	0.170382	0.171488	1.33926	2.33168e-07	0.000162974	4.05856	2.02097
118	Indolelactic acid	3.95	level1			204.066	289.7	NEG	C11H11NO3	HMDB0000671	1821-52-9	C02043	Alkaloids	Tryptophan alkaloids	Simple indole alkaloids	XGILAAMKEQUXLS-UHFFFAOYSA-N	0.145146	0.167819	0.155851	0.156272	0.0202334	0.0157029	0.0193345	0.0184236	1.33708	3.28318e-05	0.00106074	0.117894	-3.08444
119	(E)-3-(3,4-dihydroxyphenyl)-N-[2-(4-hydroxyphenyl)ethyl]prop-2-enamide	3.95	level1			298.108	288.8	NEG	C17H17NO4		103188-48-3		Shikimates and Phenylpropanoids	Phenylpropanoids (C6-C3)	Cinnamic acid amides	VSHUQLRHTJOKTA-XBXARRHUSA-N	8.5027	8.26751	7.38511	8.05178	3.40338	3.2843	5.86289	4.18352	1.17182	0.0129847	0.0393734	0.519578	-0.944588
120	5-[6-(hydroxymethyl)-7-oxatricyclo[4.3.0.03,9]nonan-9-yl]-2-methyl-4-oxo-pentanoic acid	3.95	level1			281.139	284.8	NEG	C15H22O5				Terpenoids			DULAWUXQXSFPOC-UHFFFAOYSA-N	0.31116	0.378829	0.348074	0.346021	0.154934	0.162422	0.131085	0.14948	1.31377	0.000826951	0.00612076	0.431998	-1.2109
121	methyl (E)-3-[4-[(2S,3R,4S,5S,6R)-3,4,5-trihydroxy-6-(hydroxymethyl)tetrahydropyran-2-yl]oxyphenyl]prop-2-enoate	3.95	level1			339.108	268.7	NEG	C16H20O8		554-87-0		Shikimates and Phenylpropanoids	Phenylpropanoids (C6-C3)	Cinnamic acids and derivatives	KPYQJVYNSWDFQU-ORXIWHNOSA-N	0.0800224	0.0846376	0.0796851	0.0814484	0.129972	0.124149	0.114619	0.122914	1.31487	0.00094994	0.00670346	1.5091	0.593686
123	Terephthalic-Acid	3.95	level1			165.019	247.2	NEG	C8H6O4	HMDB0002428	100-21-0	C06337	Shikimates and Phenylpropanoids	Phenolic acids (C6-C1)	Simple phenolic acids	KKEYFWRCBNTPAC-UHFFFAOYSA-N	0.178935	0.251194	0.226645	0.218925	0.269637	0.365653	0.372804	0.336031	1.1105	0.0412075	0.0931535	1.53492	0.618162
124	Ketoleucine	3.95	level1			129.056	245.9	NEG	C6H10O3	HMDB0000695	816-66-0	C00233	Fatty acids	Fatty Acids and Conjugates	Oxo fatty acids	BKAJNAXTPSGJCU-UHFFFAOYSA-N	0.119533	0.130221	0.122006	0.12392	0.0767819	0.0801825	0.0831291	0.0800311	1.3249	0.00029373	0.00326527	0.645828	-0.630779
125	3-[2-hydroxy-3-[(2S,3R,4S,5S,6R)-3,4,5-trihydroxy-6-(hydroxymethyl)tetrahydropyran-2-yl]oxy-phenyl]propanoic acid	3.95	level1			343.103	240.2	NEG	C15H20O9				Shikimates and Phenylpropanoids			JDNUVLAJLPVYNP-SWMGHYKJSA-N	0.505088	0.882577	0.506664	0.631443	1.37169	1.35746	1.3351	1.35475	1.21698	0.028104	0.0696879	2.14548	1.1013
126	3-Isopropylmalic acid	3.95	level1			175.061	215.9	NEG	C7H12O5	HMDB0012156	921-28-8	C04411	Fatty acids	Fatty Acids and Conjugates	Dicarboxylic acids	RNQHMTFBUSSBJQ-CRCLSJGQSA-N	3.09275	3.6142	3.28547	3.33081	1.28038	1.3046	1.21104	1.26534	1.33412	0.000182366	0.00252041	0.37989	-1.39635
127	Phenylalanine	3.95	level1			164.072	105.9	NEG	C9H11NO2	HMDB0000159	63-91-2	C00079	Amino acids and Peptides	Small peptides	Aminoacids	COLNVLDHVKWLRT-QMMMGPOBSA-N	8.93512	9.29499	9.02378	9.08463	12.2679	11.9745	11.7783	12.0069	1.33192	8.19703e-05	0.00164997	1.32167	0.402362
129	Mannitol	3.95	level1			181.072	42.1	NEG	C6H14O6	HMDB0000765	69-65-8	C00392	Carbohydrates	Saccharides	Monosaccharides	FBPFZTCFMRRESA-KVTDHHQDSA-N	0.386688	0.451615	0.431475	0.423259	0.285893	0.255714	0.270406	0.270671	1.30108	0.00193063	0.0105939	0.639492	-0.645003
130	Raffinose	3.95	level1			505.175	467.1	POS	C18H32O16	HMDB0003213	512-69-6	C00492	Carbohydrates	Saccharides	Polysaccharides	MUPFEKGTMRGPLJ-ZQSKZDJDSA-N	0.00372633	0.00375028	0.00389789	0.0037915	0.00753535	0.00756181	0.00564282	0.00691333	1.27361	0.0381695	0.0878992	1.82337	0.866611
131	2-Aminoadipic acid	3.95	level1			160.061	427	NEG	C6H11NO4	HMDB0000510	542-32-5	C00956	Amino acids and Peptides	Small peptides	Aminoacids	OYIFNHCXNCRBQI-UHFFFAOYSA-N	0.0274267	0.029782	0.0255597	0.0275895	0.0484067	0.0465658	0.0455315	0.0468347	1.32048	0.000203425	0.00267395	1.69756	0.76346
134	2-Hydroxyadenine	3.95	level1			152.056	326.1	POS	C5H5N5O	HMDB0000403	3373-53-3		Alkaloids	Pseudoalkaloids	Purine alkaloids	DRAVOWXCEBXPTN-UHFFFAOYSA-N	0.0419368	0.0335184	0.0374489	0.0376347	0.0821989	0.0776245	0.0746576	0.0781604	1.31733	0.000245122	0.00294471	2.07682	1.05437
136	Ribitol	3.95	level1			151.061	252.2	NEG	C5H12O5	HMDB0002917	87-99-0	C00474				HEBKCHPVOIAQTA-SCDXWVJYSA-N	2.1235	2.41291	2.38459	2.307	0.264266	0.257392	0.253758	0.258472	1.34051	0.0019961	0.0108246	0.112038	-3.15794
137	Deoxyguanosine	3.95	level1			268.103	251.5	POS	C10H13N5O4	HMDB0000085	961-07-9	C00330	Carbohydrates	Nucleosides	Purine nucleos(t)ides	YKBGVTZYEHREMT-KVQBGUIXSA-N	0.00757067	0.00751557	0.00677361	0.00728662	0.0117739	0.0123516	0.0110021	0.0117092	1.3139	0.00069827	0.00551635	1.60694	0.68432
139	Inosine	3.95	level1			269.087	235.4	POS	C10H12N4O5	HMDB0000195	58-63-9	C00294	Carbohydrates	Nucleosides	Purine nucleos(t)ides	UGQMRVRMYYASKQ-KQYNXXCUSA-N	0.00908683	0.00776272	0.00894629	0.00859861	0.0220422	0.021675	0.0202905	0.0213359	1.33136	4.74977e-05	0.00125897	2.48132	1.31111
140	Leu-Ile	3.95	level1			243.171	204.9	NEG	C12H24N2O3	HMDB0028932	36077-41-5		Amino acids and Peptides	Small peptides	Dipeptides	AZLASBBHHSLQDB-GUBZILKMSA-N	0.575954	0.560309	0.56464	0.566968	0.715929	0.700085	0.650416	0.68881	1.28108	0.00386217	0.0167844	1.2149	0.28084
141	Peiminine	3.95	level1			412.32	150.2	POS	C27H43NO3		18059-10-4	C10808	Alkaloids	Pseudoalkaloids	Steroidal alkaloids	IQDIERHFZVCNRZ-YUYPDVIUSA-N	0.0454538	0.0492036	0.0566054	0.0504209	0.441417	0.469332	0.453315	0.454688	1.33906	1.29836e-06	0.000309637	9.01784	3.17278
142	Ribothymidine	3.95	level1			257.077	148.7	NEG	C10H14N2O6	HMDB0000884	1463-10-1		Carbohydrates	Nucleosides	Pyrimidine nucleos(t)ides	DWRXFEITVBNRMK-JXOAFFINSA-N	0.122257	0.151185	0.148141	0.140528	0.0494987	0.0529507	0.0740275	0.0588256	1.27733	0.00240008	0.0122167	0.418606	-1.25634
143	Tropinone	3.95	level1			140.107	68.3	POS	C8H13NO	HMDB0304521	532-24-1	C00783	Alkaloids	Lysine alkaloids	Piperidine alkaloids	QQXLDOJGLXJCSE-UHFFFAOYSA-N	0.456154	0.41179	0.449737	0.439227	2.18068	2.14377	2.08561	2.13669	1.3402	6.61105e-07	0.000244964	4.86465	2.28234
144	Tomatidine	3.95	level1			416.351	38.5	POS	C27H45NO2		77-59-8	C10826	Alkaloids	Pseudoalkaloids	Steroidal alkaloids	XYNPYHXGMWJBLV-VXPJTDKGSA-N	4.38072	5.2373	4.82144	4.81315	16.5561	18.772	17.0191	17.4491	1.33507	6.1468e-05	0.0014191	3.62529	1.8581
146	Thiophanate-Methyl	3.95	level1			343.052	35.7	POS	C12H14N4O4S2	HMDB0259025	23564-05-8	C14432	Alkaloids			QGHREAKMXXNCOA-UHFFFAOYSA-N	1.13686	1.1899	1.06289	1.12989	0.0112648	0.0199966	0.00845978	0.0132404	1.3328	0.000993599	0.00690265	0.0117183	-6.41509
152	Caproic acid	3.94	level1			115.076	73.3	NEG	C6H12O2	HMDB0000535	142-62-1	C01585	Fatty acids	Fatty Acids and Conjugates	Branched fatty acids	FUZZWVXGSFPDMH-UHFFFAOYSA-N	0.893579	1.04674	0.973665	0.971327	0.728039	0.730978	0.707503	0.722173	1.27813	0.00513529	0.0204353	0.743492	-0.427612
153	Pomolic acid	3.94	level1			471.347	51.4	NEG	C30H48O4		13849-91-7		Terpenoids	Triterpenoids	Ursane and Taraxastane triterpenoids	ZZTYPLSBNNGEIS-OPAXANQDSA-N	0.0166351	0.00779718	0.00808514	0.0108391	0.125662	0.158361	0.210188	0.164737	1.31331	0.0233408	0.0604992	15.1983	3.92584
154	(1S,2R,4aS,6aS,6bR,10R,11R,12aR,14bS)-10,11-dihydroxy-1,2,6a,6b,9,9,12a-heptamethyl-2,3,4,5,6,6a,7,8,8a,10,11,12,13,14b-tetradecahydro-1H-picene-4a-carboxylic acid	3.94	level1			471.347	51.4	NEG	C30H48O4		4547-24-4		Terpenoids	Triterpenoids	Ursane and Taraxastane triterpenoids	HFGSQOYIOKBQOW-WZSFHCERSA-N	0.0166351	0.00779718	0.00808514	0.0108391	0.125662	0.158361	0.210188	0.164737	1.31331	0.0233408	0.0604992	15.1983	3.92584
155	Arachidonic acid (AA)	3.94	level1			303.233	545.9	NEG	C20H32O2	HMDB0001043	506-32-1	C00219	Fatty acids	Fatty Acids and Conjugates	Unsaturated fatty acids	YZXBAPSDXZZRGB-DOFZRALJSA-N	1.69171	2.02185	1.94915	1.88757	2.53506	2.49323	2.44727	2.49185	1.24803	0.00426175	0.0179453	1.32014	0.40069
156	3-Methyl-2-oxovaleric acid	3.94	level1			129.056	245.9	NEG	C6H10O3	HMDB0000491	1460-34-0	C03465	Fatty acids	Fatty Acids and Conjugates	Branched fatty acids	JVQYSWDUAOAHFM-UHFFFAOYSA-N	0.119533	0.130221	0.122006	0.12392	0.0767819	0.0801825	0.0831291	0.0800311	1.3249	0.00029373	0.00326527	0.645828	-0.630779
157	Tropine	3.94	level1			142.122	46.5	POS	C8H15NO	HMDB0259297	120-29-6	C02066	Alkaloids	Ornithine alkaloids	Tropane alkaloids	CYHOMWAPJJPNMW-UHFFFAOYSA-N	2.50802	2.16759	2.50333	2.39298	6.15649	6.14467	5.86227	6.05448	1.33348	1.5909e-05	0.000778043	2.5301	1.33919
158	Heptadecanoic acid	3.94	level1			269.248	577.4	NEG	C17H34O2	HMDB0002259	506-12-7		Fatty acids	Fatty Acids and Conjugates	Branched fatty acids	KEMQGTRYUADPNZ-UHFFFAOYSA-N	4.08392	4.72868	5.03279	4.61513	5.8063	5.75833	6.05549	5.87337	1.18898	0.0129263	0.0392449	1.27263	0.347818
162	Ursolic acid	3.94	level1			455.353	542.8	NEG	C30H48O3				Terpenoids	Triterpenoids	Ursane and Taraxastane triterpenoids	WCGUUGGRBIKTOS-GPOJBZKASA-N	0.0350789	0.0291573	0.0343247	0.0328536	0.223197	0.229507	0.248429	0.233711	1.33839	1.35512e-05	0.000723346	7.1137	2.8306
164	PC(10:0/10:0)	3.94	level1			548.37	517	POS	C28H56NO8P	HMDB0244070	3436-44-0		Fatty acids	Glycerophospholipids	Glycerophosphocholines	MLKLDGSYMHFAOC-AREMUKBSSA-N	0.0051275	0.00517379	0.00567439	0.00532523	0.0219048	0.0126526	0.0205989	0.0183855	1.28729	0.0452105	0.0999805	3.45252	1.78765
166	Quillaic acid	3.94	level1			485.327	463.8	NEG	C30H46O5		631-01-6	C08972	Terpenoids	Triterpenoids	Oleanane triterpenoids	MQUFAARYGOUYEV-UAWZMHPWSA-N	0.00284378	0.0017862	0.00277238	0.00246745	0.133224	0.113728	0.22824	0.158397	1.33094	0.0477872	0.104208	64.1947	6.00438
171	(2R,3R,4S,5S,6R)-2-[(2E)-3,7-dimethylocta-2,6-dienoxy]-6-[[(2S,3R,4S,5R)-3,4,5-trihydroxytetrahydropyran-2-yl]oxymethyl]tetrahydropyran-3,4,5-triol	3.94	level1			429.213	348.3	NEG	C21H36O10		150995-11-2		Terpenoids	Monoterpenoids	Acyclic monoterpenoids	IEGFOTASSBZIBZ-QLPUMLPOSA-N	0.217214	0.25227	0.222721	0.230735	2.24181	2.24506	2.063	2.18329	1.34	5.7274e-06	0.000525778	9.46234	3.2422
174	5-acetyl-2-hydroxy-benzoic acid	3.94	level1			179.035	263.4	NEG	C9H8O4		13110-96-8		Shikimates and Phenylpropanoids	Phenolic acids (C6-C1)	Simple phenolic acids	NZRDKNBIPVLNHA-UHFFFAOYSA-N	0.174486	0.155348	0.225252	0.185029	0.67666	0.634511	0.757209	0.68946	1.31933	0.000265382	0.0030839	3.72623	1.89772
175	2-Hydroxyhexanoic acid	3.94	level1			131.071	262.6	NEG	C6H12O3	HMDB0001624	6064-63-7		Fatty acids	Fatty Acids and Conjugates	Hydroxy fatty acids	NYHNVHGFPZAZGA-UHFFFAOYSA-N	0.721291	0.809225	0.761607	0.764041	1.8408	1.71892	1.72567	1.7618	1.33537	2.91389e-05	0.00100246	2.30589	1.20533
177	Salidroside	3.94	level1			299.114	226.1	NEG	C14H20O7		10338-51-9	C06046	Shikimates and Phenylpropanoids	Phenylethanoids (C6-C2)	Phenylethanoids	ILRCGYURZSFMEG-RKQHYHRCSA-N	0.0630955	0.0506629	0.0656458	0.0598014	0.132831	0.126829	0.190837	0.150166	1.2718	0.0124671	0.0382235	2.51108	1.32831
179	Nicotinamide	3.94	level1			123.055	99.1	POS	C6H6N2O	HMDB0001406	98-92-0	C00153	Alkaloids	Nicotinic acid alkaloids	Pyridine alkaloids	DFPAKSUCGFBDDF-UHFFFAOYSA-N	0.104206	0.0987576	0.0933094	0.0987577	0.0784773	0.0742521	0.0710965	0.0746086	1.28295	0.00315246	0.0146491	0.755472	-0.404551
180	Allopurinol-1-ribonucleoside	3.94	level1			267.073	98.9	NEG	C10H12N4O5	HMDB0000481	16220-07-8		Carbohydrates	Nucleosides	Purine nucleos(t)ides	KFQUAMTWOJHPEJ-DAGMQNCNSA-N	0.278319	0.278262	0.289573	0.282051	0.49915	0.525357	0.508083	0.510863	1.33854	1.16551e-05	0.000679614	1.81124	0.856979
182	Hydroxyacetone	3.94	level1			73.0295	56.4	NEG	C3H6O2	HMDB0006961	116-09-6	C05235				XLSMFKSTNGKWQX-UHFFFAOYSA-N	0.513799	0.587099	0.567809	0.556236	0.740077	0.706574	0.682038	0.709563	1.25371	0.00516821	0.0205138	1.27565	0.351234
183	Caplamin	3.94	level1			130.087	52.8	NEG	C6H13NO2	HMDB0001901	60-32-2	C02378	Fatty acids	Fatty Acids and Conjugates	Amino fatty acids	SLXKOJJOQWFEFD-UHFFFAOYSA-N	3.42893	3.63915	3.5397	3.53593	4.26718	4.47845	4.01079	4.25214	1.24837	0.00844814	0.0288991	1.20255	0.2661
184	2-O-β-D-Glucopyranosyl-L-ascorbic acid	3.94	level1			337.077	46.1	NEG	C12H18O11	HMDB0253873	562043-82-7		Carbohydrates	Saccharides	Monosaccharides	MLSJBGYKDYSOAE-UHFFFAOYSA-N	0.524217	0.617774	0.5669	0.569631	0.453956	0.456151	0.425643	0.44525	1.23278	0.0124172	0.038109	0.781647	-0.35541
185	Trigonelline	3.94	level1			138.055	45.6	POS	C7H7NO2	HMDB0000875	535-83-1	C01004	Alkaloids	Nicotinic acid alkaloids	Pyridine alkaloids	WWNNZCOKKKDOPX-UHFFFAOYSA-N	0.417793	0.38675	0.396084	0.400209	0.796712	0.801993	0.807844	0.802183	1.33853	2.06123e-06	0.000368593	2.00441	1.00318
186	Turanose	3.94	level1			341.108	45.3	NEG	C12H22O11		547-25-1		Carbohydrates	Saccharides	Disaccharides	SEWFWJUQVJHATO-UHFFFAOYSA-N	6.77195	7.235	7.1547	7.05388	7.84086	7.98499	8.38252	8.06946	1.23488	0.00929197	0.0309572	1.14397	0.194054
187	(2R,3S,4S,5R,6R)-2-(hydroxymethyl)-6-[(2S,3R,4S,5S,6R)-3,4,5-trihydroxy-6-(hydroxymethyl)tetrahydropyran-2-yl]oxy-tetrahydropyran-3,4,5-triol	3.94	level1			341.108	45.3	NEG	C12H22O11		585-91-1		Carbohydrates	Saccharides	Disaccharides	HDTRYLNUVZCQOY-BTLHAWITSA-N	6.77195	7.235	7.1547	7.05388	7.84086	7.98499	8.38252	8.06946	1.23488	0.00929197	0.0309572	1.14397	0.194054
188	Galactose	3.94	level1			203.052	43.1	POS	C6H12O6	HMDB0000143	10257-28-0	C00984	Carbohydrates	Saccharides	Monosaccharides	WQZGKKKJIJFFOK-MCPPVLNHSA-N	0.699653	0.770259	0.703672	0.724528	1.74844	1.82035	1.69623	1.75501	1.33691	1.73989e-05	0.000802331	2.42228	1.27636
189	Fructose	3.94	level1			203.052	43.1	POS	C6H12O6	HMDB0000660	53188-23-1	C02336	Carbohydrates	Saccharides	Monosaccharides	RFSUNEUAIZKAJO-ARQDHWQXSA-N	0.699653	0.770259	0.703672	0.724528	1.74844	1.82035	1.69623	1.75501	1.33691	1.73989e-05	0.000802331	2.42228	1.27636
191	trans-Aconitic acid	3.94	level1			173.009	455	NEG	C6H6O6	HMDB0000958	4023-65-8	C02341	Fatty acids	Fatty Acids and Conjugates	Dicarboxylic acids	GTZCVFVGUGFEME-HNQUOIGGSA-N	6.0462	6.12023	6.15999	6.10881	5.23381	5.22737	4.96629	5.14249	1.31273	0.000509473	0.0045386	0.841816	-0.248423
193	Glucuronic acid	3.94	level1			193.035	405.1	NEG	C6H10O7	HMDB0000127	528-16-5|6556-12-3|576-37-4|72121-88-1	C00191	Carbohydrates	Saccharides	Monosaccharides	AEMOLEFTQBMNLQ-AQKNRBDQSA-N	0.0513226	0.0493548	0.0537903	0.0514892	0.114603	0.113196	0.107239	0.111679	1.33685	2.05165e-05	0.000862759	2.16898	1.11702
194	Fumaric acid	3.94	level1			115.004	393	NEG	C4H4O4	HMDB0000134	110-17-8	C00122	Fatty acids	Fatty Acids and Conjugates	Dicarboxylic acids	VZCYOOQTPOCHFL-OWOJBTEDSA-N	2.53291	2.73451	2.69209	2.65317	1.50167	1.52973	1.45484	1.49541	1.33526	5.8861e-05	0.0013908	0.563632	-0.827174
195	Malonic acid	3.94	level1			103.003	392.4	NEG	C3H4O4	HMDB0000691	141-82-2	C00383	Fatty acids	Fatty Acids and Conjugates	Dicarboxylic acids	OFOBLEOULBTSOW-UHFFFAOYSA-N	0.95508	1.01319	1.00053	0.989599	0.82057	0.669114	0.817396	0.769027	1.17929	0.0141145	0.0417994	0.77711	-0.36381
196	Shikimic acid	3.94	level1			173.045	373.2	NEG	C7H10O5	HMDB0003070	138-59-0	C00493	Shikimates and Phenylpropanoids	Phenolic acids (C6-C1)	Shikimic acids and derivatives	JXOHGGNKMLTUBP-HSUXUTPPSA-N	0.17449	0.171826	0.181711	0.176009	0.167095	0.160639	0.156252	0.161329	1.15699	0.0272617	0.06805	0.916593	-0.125646
197	Carnitine	3.94	level1			162.112	370.2	POS	C7H15NO3	HMDB0000062	541-15-1	C00318	Fatty acids	Fatty esters	Fatty acyl carnitines	PHIQHXFUZVPYII-ZCFIWIBFSA-N	0.506397	0.534787	0.526229	0.522471	0.790704	0.789271	0.795325	0.791767	1.33739	6.21121e-06	0.000538024	1.51543	0.599725
198	Taurine	3.94	level1			124.007	314.1	NEG	C2H7NO3S	HMDB0000251	107-35-7	C00245				XOAAWQZATWQOTB-UHFFFAOYSA-N	0.0328586	0.0333362	0.0366529	0.0342826	0.0755019	0.0742444	0.0713591	0.0737018	1.33484	2.10319e-05	0.000869749	2.14983	1.10423
199	H-Val-Ala-OH	3.94	level1			187.108	274.6	NEG	C8H16N2O3	HMDB0029120	27493-61-4		Amino acids and Peptides	Small peptides	Dipeptides	HSRXSKHRSXRCFC-WDSKDSINSA-N	0.367424	0.333124	0.358962	0.35317	0.715624	0.71941	0.624181	0.686405	1.32341	0.00052833	0.00464471	1.94355	0.958696
200	N-Acetylgalactosamine	3.94	level1			220.082	272.4	NEG	C8H15NO6	HMDB0006480	14131-60-3	C05021	Carbohydrates	Aminosugars and aminoglycosides	Aminosugars	OVRNDRQMDRJTHS-JAJWTYFOSA-N	0.129466	0.130171	0.134876	0.131504	0.163567	0.148432	0.175749	0.162583	1.20764	0.0183701	0.0507128	1.23633	0.306064
201	Cytidine	3.94	level1			242.078	258.9	NEG	C9H13N3O5	HMDB0000089	65-46-3	C00475	Carbohydrates	Nucleosides	Pyrimidine nucleos(t)ides	UHDGCWIWMRVCDJ-XVFCMESISA-N	0.152072	0.156602	0.160227	0.156301	0.124825	0.122396	0.116072	0.121098	1.31367	0.000560179	0.00481478	0.774776	-0.36815
203	LPC(13:0)	3.94	level1			452.277	225.4	NEG	C21H44NO7P		20559-17-5		Fatty acids	Glycerophospholipids	Glycerophosphocholines	WNRCJJWBAXNAPE-HXUWFJFHSA-N	0.750563	0.814352	0.779622	0.781512	0.642332	0.651441	0.603273	0.632349	1.27923	0.0032195	0.0148481	0.809134	-0.305549
204	N2,N2-Dimethylguanosine	3.94	level1			312.13	208.8	POS	C12H17N5O5	HMDB0004824	2140-67-2		Carbohydrates	Nucleosides	Purine nucleos(t)ides	RSPURTUNRHNVGF-IOSLPCCCSA-N	0.038903	0.0344307	0.0376556	0.0369964	0.076647	0.0762716	0.0678118	0.0735768	1.32512	0.000325032	0.00346189	1.98875	0.991865
205	Sipeimine	3.94	level1			412.32	182.9	POS	C27H43NO3		61825-98-7		Alkaloids	Pseudoalkaloids	Steroidal alkaloids	IQDIERHFZVCNRZ-LRCDAWNTSA-N	0.0175191	0.0178796	0.0172553	0.0175513	0.100546	0.117963	0.0921254	0.103545	1.33711	0.00770943	0.0270649	5.89953	2.5606
207	5-hydroxy-6,8-dimethoxy-7-[(2S,3R,4S,5S,6R)-3,4,5-trihydroxy-6-(hydroxymethyl)tetrahydropyran-2-yl]oxy-chromen-2-one	3.94	level1			399.092	159.2	NEG	C17H20O11				Shikimates and Phenylpropanoids	Coumarins	Simple coumarins	KDWWYRPEBULRGU-KIZWGXMFSA-N	0.396054	0.44291	0.42033	0.419765	0.300214	0.268527	0.26611	0.278283	1.30309	0.0012523	0.00800984	0.662951	-0.593025
208	Homoveratric acid	3.94	level1			195.066	151.5	NEG	C10H12O4	HMDB0000434	93-40-3		Shikimates and Phenylpropanoids	Phenolic acids (C6-C1)	Simple phenolic acids	WUAXWQRULBZETB-UHFFFAOYSA-N	0.158432	0.149605	0.157216	0.155084	0.636032	0.58754	0.587968	0.603847	1.33996	1.04241e-05	0.000651938	3.89367	1.96113
211	Cyclopamine	3.94	level1			412.32	62.7	POS	C27H41NO2		4449-51-8	C10798	Alkaloids	Pseudoalkaloids	Steroidal alkaloids	QASFUMOKHFSJGL-LAFRSMQTSA-N	0.024628	0.0248227	0.0253908	0.0249472	0.103298	0.125133	0.104326	0.110919	1.33689	0.006731	0.0246304	4.44615	2.15256
213	2-Piperidone	3.94	level1			100.075	54.7	POS	C5H9NO	HMDB0011749	675-20-7		Alkaloids	Lysine alkaloids	Piperidine alkaloids	XUWHAWMETYGRKB-UHFFFAOYSA-N	0.145531	0.158536	0.165604	0.156557	0.0774296	0.0843454	0.0730159	0.0782636	1.32388	0.000313827	0.00338941	0.499904	-1.00028
214	3-Pyridinemethanol	3.94	level1			110.06	52.1	POS	C6H7NO	HMDB0245980	100-55-0	D05158	Alkaloids	Nicotinic acid alkaloids	Pyridine alkaloids	MVQVNTPHUGQQHK-UHFFFAOYSA-N	0.0115374	0.0144767	0.0124513	0.0128218	0.0254609	0.0260304	0.0284724	0.0266546	1.31456	0.000400724	0.00391501	2.07885	1.05579
217	Cer(d18:1/16:0)	3.94	level1			538.518	34	POS	C34H67NO3	HMDB0004949	24696-26-2		Fatty acids	Sphingolipids	Ceramides	YDNKGFDKKRUKPY-UHFFFAOYSA-N	0.00968816	0.00973408	0.00855931	0.00932719	0.034374	0.0431097	0.0454831	0.0409889	1.33057	0.0104382	0.033608	4.39457	2.13572
219	Norepinephrine	3.94	level1			152.07	223.4	POS	C8H11NO3	HMDB0000216	51-41-2	C00547	Alkaloids	Tyrosine alkaloids	Phenylethylamines	SFLSHLFXELFNJZ-QMMMGPOBSA-N	0.00704562	0.00689897	0.0074817	0.00714209	0.0230567	0.0240224	0.0217878	0.0229556	1.3388	1.91381e-05	0.000839364	3.21413	1.68443
220	5-Aminopentanoic acid	3.93	level1			116.072	47	NEG	C5H11NO2	HMDB0003355	660-88-8	C00431	Fatty acids	Fatty Acids and Conjugates	Amino fatty acids	JJMDCOVWQOJGCB-UHFFFAOYSA-N	0.665947	0.70424	0.705484	0.69189	1.07988	1.08231	0.958798	1.04033	1.31089	0.00123718	0.00794619	1.5036	0.588424
221	(1R,2R,4aS,6aS,6bR,10S,11R,12aR)-1,10,11-trihydroxy-1,2,6a,6b,9,9,12a-heptamethyl-2,3,4,5,6,6a,7,8,8a,10,11,12,13,14b-tetradecahydropicene-4a-carboxylic acid	3.93	level1			487.342	448.3	NEG	C30H48O5		53155-25-2		Terpenoids	Triterpenoids	Ursane and Taraxastane triterpenoids	OXVUXGFZHDKYLS-YFIQRXMRSA-N	0.0294846	0.0491338	0.0245851	0.0344012	2.02795	1.39271	2.84707	2.08924	1.32804	0.03946	0.0901502	60.7317	5.92438
222	(4aS,6aS,6bR,9R,10R,11R,12aR)-10,11-dihydroxy-9-(hydroxymethyl)-2,2,6a,6b,9,12a-hexamethyl-1,3,4,5,6,6a,7,8,8a,10,11,12,13,14b-tetradecahydropicene-4a-carboxylic acid	3.93	level1			487.342	448.3	NEG	C30H48O5		465-00-9		Terpenoids	Triterpenoids	Oleanane triterpenoids	RWNHLTKFBKYDOJ-IJDLJTCJSA-N	0.0294846	0.0491338	0.0245851	0.0344012	2.02795	1.39271	2.84707	2.08924	1.32804	0.03946	0.0901502	60.7317	5.92438
223	2-Methylvaleric acid	3.93	level1			115.076	73.3	NEG	C6H12O2	HMDB0031580	22160-39-0		Fatty acids	Fatty Acids and Conjugates	Branched fatty acids	OVBFMEVBMNZIBR-UHFFFAOYSA-N	0.893579	1.04674	0.973665	0.971327	0.728039	0.730978	0.707503	0.722173	1.27813	0.00513529	0.0204353	0.743492	-0.427612
224	(2S,4aS,6aS,6bR,10S,12aS,14bS)-10-hydroxy-2,4a,6a,6b,9,9,12a-heptamethyl-13-oxo-3,4,5,6,6a,7,8,8a,10,11,12,14b-dodecahydro-1H-picene-2-carboxylic acid	3.93	level1			469.332	499.3	NEG	C30H46O4		1449-05-4		Terpenoids	Triterpenoids	Oleanane triterpenoids	MPDGHEJMBKOTSU-IYTIXWHISA-N	1.17468e-05	1.2935e-05	1.24167e-05	1.23661e-05	0.0200178	0.0348363	0.022695	0.0258497	1.34027	0.0297559	0.072814	2090.36	11.0295
225	(4aS,6aS,6bR,10S,12aR)-10-hydroxy-2,2,6a,6b,9,9,12a-heptamethyl-1,3,4,5,6,6a,7,8,8a,10,11,12,13,14b-tetradecahydropicene-4a-carboxylic acid	3.93	level1			455.353	542.8	NEG	C30H48O3		508-02-1		Terpenoids	Triterpenoids	Oleanane triterpenoids	MIJYXULNPSFWEK-FQRDBSNUSA-N	0.0350789	0.0291573	0.0343247	0.0328536	0.223197	0.229507	0.248429	0.233711	1.33839	1.35512e-05	0.000723346	7.1137	2.8306
227	(2R,3R,4S,5S,6R)-2-[(2E)-3,7-dimethylocta-2,6-dienoxy]-6-[[(2S,3R,4S,5S)-3,4,5-trihydroxytetrahydropyran-2-yl]oxymethyl]tetrahydropyran-3,4,5-triol	3.93	level1			429.213	348.3	NEG	C21H36O10		152520-94-0		Terpenoids	Monoterpenoids	Acyclic monoterpenoids	IEGFOTASSBZIBZ-WRRPXPPESA-N	0.217214	0.25227	0.222721	0.230735	2.24181	2.24506	2.063	2.18329	1.34	5.7274e-06	0.000525778	9.46234	3.2422
228	Hydroxyisocaproic acid	3.93	level1			131.071	262.6	NEG	C6H12O3	HMDB0000665	498-36-2	C03264	Fatty acids	Fatty Acids and Conjugates	Branched fatty acids	LVRFTAZAXQPQHI-UHFFFAOYSA-N	0.721291	0.809225	0.761607	0.764041	1.8408	1.71892	1.72567	1.7618	1.33537	2.91389e-05	0.00100246	2.30589	1.20533
229	Palatinose (hydrate)	3.93	level1			341.108	45.3	NEG	C12H22O11		13718-94-0	C01742	Carbohydrates	Saccharides	Disaccharides	PVXPPJIGRGXGCY-TZLCEDOOSA-N	6.77195	7.235	7.1547	7.05388	7.84086	7.98499	8.38252	8.06946	1.23488	0.00929197	0.0309572	1.14397	0.194054
230	Galactinol	3.93	level1			341.108	45.3	NEG	C12H22O11		3687-64-7		Carbohydrates	Polyols	Cyclitols	VCWMRQDBPZKXKG-BJBMSVMHSA-N	6.77195	7.235	7.1547	7.05388	7.84086	7.98499	8.38252	8.06946	1.23488	0.00929197	0.0309572	1.14397	0.194054
231	Allose	3.93	level1			203.052	43.1	POS	C6H12O6	HMDB0062473	39392-62-6	C01487	Carbohydrates	Saccharides	Monosaccharides	GZCGUPFRVQAUEE-OBOOZECYSA-N	0.699653	0.770259	0.703672	0.724528	1.74844	1.82035	1.69623	1.75501	1.33691	1.73989e-05	0.000802331	2.42228	1.27636
232	3-Hydroxy-2-methylpyridine	3.93	level1			110.06	52.1	POS	C6H7NO		1121-25-1		Alkaloids	Nicotinic acid alkaloids	Pyridine alkaloids	AQSRRZGQRFFFGS-UHFFFAOYSA-N	0.0115374	0.0144767	0.0124513	0.0128218	0.0254609	0.0260304	0.0284724	0.0266546	1.31456	0.000400724	0.00391501	2.07885	1.05579
236	(3R,4R,6aR,6bS,8aR,11R,12S,12aR,14bS)-3-acetoxy-4,6a,6b,8a,11,12,14b-heptamethyl-14-oxo-1,2,3,4a,5,6,7,8,9,10,11,12,12a,14a-tetradecahydropicene-4-carboxylic acid	3.93	level1			513.357	533.3	POS	C32H48O5		67416-61-9		Terpenoids	Triterpenoids	Serratane triterpenoids	HMMGKOVEOFBCAU-MFIYSICPSA-N	0.00107226	0.000783422	0.00104065	0.000965445	0.00189315	0.00177911	0.00161506	0.00176244	1.2613	0.00283524	0.0136499	1.82552	0.868307
239	LPE(14:0)	3.93	level1			424.247	478.2	NEG	C19H40NO7P	HMDB0011500	123060-40-2		Fatty acids	Glycerophospholipids	Glycerophosphoethanolamines	RPXHXZNGZBHSMJ-GOSISDBHSA-N	0.00931203	0.00716834	0.0111607	0.00921368	0.0298025	0.0565953	0.0452719	0.0438899	1.28697	0.0439956	0.0979629	4.76355	2.25204
242	Prochloraz	3.93	level1			376.037	447.4	POS	C15H16Cl3N3O2	HMDB0062513	67747-09-5	C11182	Alkaloids			TVLSRXXIMLFWEO-UHFFFAOYSA-N	0.1375	0.2046	0.161813	0.167971	0.0230488	0.0322244	0.0246606	0.0266446	1.32273	0.0170997	0.0480991	0.158626	-2.6563
243	Ligustilide	3.93	level1			191.106	428.8	POS	C12H14O2	HMDB0302720	4431-01-0	C16987	Polyketides	Cyclic polyketides	Phthalide derivatives	IQVQXVFMNOFTMU-FLIBITNWSA-N	0.310988	0.342562	0.392434	0.348661	0.184081	0.167563	0.171872	0.174506	1.31252	0.00198159	0.0107759	0.500502	-0.998552
244	2-[(3S,3aR,5R,7aS)-3a-acetyl-3-hydroxy-7a-methyl-2,3,4,5,6,7-hexahydro-1H-inden-5-yl]prop-2-enoic acid	3.93	level1			265.144	363.8	NEG	C15H22O4		117869-89-3		Terpenoids	Sesquiterpenoids	Iphionane sesquiterpenoids	QHMVDJGMBDTIEY-DHMWGJHJSA-N	0.0304813	0.0295274	0.0271817	0.0290635	0.123124	0.0965332	0.0911645	0.103607	1.32543	0.0163668	0.0465652	3.56487	1.83385
245	7,3',4'-Trihydroxyflavone	3.93	level1			269.045	319.8	NEG	C15H10O5		2150-11-0		Shikimates and Phenylpropanoids	Flavonoids	Flavones	PVFGJHYLIHMCQD-UHFFFAOYSA-N	0.243286	0.207949	0.244742	0.231992	0.00706729	0.0106135	0.0102776	0.00931946	1.33631	0.00270624	0.013222	0.0401714	-4.63769
246	Sulfuretin	3.93	level1			269.045	319.8	NEG	C15H10O5		120-05-8	C08730	Shikimates and Phenylpropanoids	Flavonoids	Aurones	RGNXWPVNPFAADO-NSIKDUERSA-N	0.243286	0.207949	0.244742	0.231992	0.00706729	0.0106135	0.0102776	0.00931946	1.33631	0.00270624	0.013222	0.0401714	-4.63769
248	Lonicerin	3.93	level1			593.151	289.5	NEG	C27H30O15	HMDB0005799	25694-72-8	C12630	Shikimates and Phenylpropanoids	Flavonoids	Flavones	SHPPXMGVUDNKLV-KMFFXDMSSA-N	0.0574272	0.0669238	0.0601473	0.0614994	0.358091	0.339028	0.368993	0.355371	1.33917	5.72701e-06	0.000525778	5.77844	2.53068
249	Acetovanillone	3.93	level1			165.056	272.4	NEG	C9H10O3	HMDB0247918	498-02-2	C11380	Shikimates and Phenylpropanoids			DFYRUELUNQRZTB-UHFFFAOYSA-N	0.167214	0.198754	0.19037	0.185446	0.0422861	0.047271	0.0358977	0.0418183	1.33055	0.000135988	0.00214605	0.225501	-2.14879
250	1-[4-hydroxy-2-methyl-6-[(2S,3R,4S,5S,6R)-3,4,5-trihydroxy-6-(hydroxymethyl)tetrahydropyran-2-yl]oxy-phenyl]ethanone	3.93	level1			327.109	247.8	NEG	C15H20O8				Polyketides	Phloroglucinols	Acyl phloroglucinols	GXLXFBBEKMNRQK-TVKJYDDYSA-N	0.0588748	0.0597132	0.059816	0.059468	0.102896	0.0929503	0.1266	0.107482	1.28024	0.0404892	0.0919291	1.80739	0.853909
251	2-acetylbenzoic acid	3.93	level1			163.04	245.9	NEG	C9H8O3		577-56-0		Shikimates and Phenylpropanoids	Phenolic acids (C6-C1)	Simple phenolic acids	QDAWXRKTSATEOP-UHFFFAOYSA-N	0.217585	0.230659	0.225849	0.224698	0.206844	0.19883	0.1993	0.201658	1.24809	0.00754329	0.0266514	0.897462	-0.156077
252	Ile-Leu	3.93	level1			245.185	213	POS	C12H24N2O3	HMDB0028911	26462-22-6		Amino acids and Peptides	Small peptides	Dipeptides	JWBXCSQZLLIOCI-GUBZILKMSA-N	0.0401398	0.0376783	0.0362475	0.0380219	0.0762403	0.0853132	0.0732437	0.0782657	1.3267	0.000450921	0.0042065	2.05844	1.04155
253	Guanosine	3.93	level1			284.098	104.5	POS	C10H13N5O5	HMDB0000133	118-00-3	C00387	Carbohydrates	Nucleosides	Purine nucleos(t)ides	NYHBQMYGNKIUIF-UUOKFMHZSA-N	0.294805	0.259009	0.263551	0.272455	0.441206	0.400594	0.424971	0.422257	1.30856	0.000779715	0.00591287	1.54982	0.632105
254	Butyrylcarnitine (Car(4:0))	3.93	level1			214.143	97.8	POS	C11H21NO4	HMDB0002013	25576-40-3	C02862	Fatty acids	Fatty esters	Fatty acyl carnitines	QWYFHHGCZUCMBN-SECBINFHSA-N	0.0190074	0.0189153	0.018119	0.0186806	0.0689481	0.0622574	0.059889	0.0636982	1.3379	0.00332589	0.015165	3.40986	1.76971
257	Pyrrolidine	3.93	level1			72.0806	47	POS	C4H9N	HMDB0031641	123-75-1		Alkaloids	Lysine alkaloids		RWRDLPDLKQPQOW-UHFFFAOYSA-N	0.90468	0.874513	0.904683	0.894625	1.24119	1.24199	1.17415	1.21911	1.3284	0.000191658	0.00259588	1.3627	0.44647
258	Gluconic acid	3.93	level1			195.051	41.4	NEG	C6H12O7	HMDB0000625	526-95-4	C00257	Carbohydrates	Saccharides	Monosaccharides	RGHNJXZEOKUKBD-SQOUGZDYSA-N	0.882292	0.917764	0.897718	0.899258	1.33444	1.40572	1.3751	1.37176	1.33633	3.349e-05	0.00106951	1.52543	0.609216
259	Proline	3.93	level1			116.07	45.7	POS	C5H9NO2	HMDB0000162	147-85-3	C00148	Amino acids and Peptides	Small peptides	Aminoacids	ONIBWKKTOPOVIA-BYPYZUCNSA-N	9.2634	9.83591	8.95309	9.3508	13.5088	13.3494	13.2865	13.3816	1.32568	0.000112044	0.00194047	1.43106	0.517085
262	Saccharopine	3.93	level1			277.139	469.1	POS	C11H20N2O6	HMDB0000279	997-68-2	C00449	Amino acids and Peptides	Small peptides	Aminoacids	ZDGJAHTZVHVLOT-YUMQZZPRSA-N	0.0119267	0.0107971	0.0110319	0.0112519	0.0429651	0.0437571	0.0404045	0.0423756	1.33926	8.27347e-06	0.000594215	3.76609	1.91307
263	Aspartate	3.93	level1			134.044	423.4	POS	C4H7NO4	HMDB0000191	56-84-8	C00049	Amino acids and Peptides	Small peptides	Aminoacids	CKLJMWTZIZZHCS-REOHCLBHSA-N	0.0699011	0.0593319	0.0664855	0.0652395	0.124791	0.120931	0.114463	0.120062	1.32045	0.000224708	0.00282447	1.84032	0.879957
264	myo-Inositol	3.93	level1			179.056	409	NEG	C6H12O6	HMDB0000211	87-89-8	C00137	Carbohydrates	Polyols	Cyclitols	CDAISMWEOUEBRE-UHFFFAOYSA-N	2.61931	2.72284	2.76682	2.70299	4.82625	4.66279	4.50309	4.66405	1.33549	4.48806e-05	0.00122145	1.72551	0.787026
266	alpha-Ketoglutaric acid (alpha-KG)	3.93	level1			145.014	385.8	NEG	C5H6O5	HMDB0000208	328-50-7	C00026	Fatty acids	Fatty Acids and Conjugates	Dicarboxylic acids	KPGXRSRHYNQIFN-UHFFFAOYSA-N	8.18436	8.31366	8.48219	8.32674	7.47207	6.76007	6.55818	6.9301	1.22822	0.00857702	0.0292205	0.832271	-0.264874
268	N,N'-Diacetylchitobiose	3.93	level1			425.176	362.4	POS	C16H28N2O11	HMDB0062702	35061-50-8	C01674	Carbohydrates	Aminosugars and aminoglycosides	Aminosugars	CDOJPCSDOXYJJF-CBTAGEKQSA-N	0.00293612	0.00306378	0.0035766	0.00319216	0.00671255	0.00663155	0.00683642	0.00672684	1.32413	6.58557e-05	0.00147106	2.1073	1.07539
269	Quinic acid	3.93	level1			191.056	353.9	NEG	C7H12O6	HMDB0003072	115919-31-8	C00296				AAWZDTNXLSGCEK-WYWMIBKRSA-N	5.33235	5.4702	5.44021	5.41425	10.4826	9.65421	9.69157	9.9428	1.33573	0.00294948	0.0140152	1.83641	0.87689
270	Ectoine	3.93	level1			143.081	353.7	POS	C6H10N2O2	HMDB0240650	96702-03-3	C06231	Amino acids and Peptides	Small peptides	Aminoacids	WQXNXVUDBPYKBA-YFKPBYRVSA-N	0.343841	0.361179	0.356829	0.353949	1.39027	1.38249	1.30956	1.36077	1.34066	2.75061e-06	0.000401797	3.84454	1.94281
272	3-Dehydroquinic acid	3.93	level1			189.04	322	NEG	C7H10O6	HMDB0012710	10534-44-8	C00944	Shikimates and Phenylpropanoids	Phenolic acids (C6-C1)	Shikimic acids and derivatives	WVMWZWGZRAXUBK-SYTVJDICSA-N	0.0604956	0.0641123	0.0821331	0.0689137	0.166393	0.17359	0.164418	0.168134	1.31242	0.000165019	0.00238502	2.43977	1.28675
273	Traumatic acid	3.93	level1			227.128	312.1	NEG	C12H20O4	HMDB0000933	6402-36-4	C16308	Fatty acids	Fatty Acids and Conjugates	Dicarboxylic acids	MAZWDMBCPDUFDJ-VQHVLOKHSA-N	0.0337344	0.0352007	0.0362225	0.0350525	0.0266052	0.0326637	0.0259606	0.0284099	1.09599	0.0420842	0.0946823	0.810493	-0.303128
274	2-Methyl-3-hydroxybutyric acid	3.93	level1			117.055	214.9	NEG	C5H10O3	HMDB0000354	473-86-9		Fatty acids	Fatty Acids and Conjugates	Hydroxy fatty acids	VEXDRERIMPLZLU-UHFFFAOYSA-N	0.0190421	0.0202582	0.0182092	0.0191698	0.0291497	0.0276663	0.0255058	0.0274406	1.29283	0.00242415	0.0122929	1.43145	0.517473
275	Azasetron (hydrochloride)	3.93	level1			350.126	204	POS	C17H20ClN3O3	HMDB0248768	141922-90-9	D07481	Alkaloids	Tryptophan alkaloids		WUKZPHOXUVCQOR-UHFFFAOYSA-N	0.00326362	0.00291619	0.00340337	0.00319439	0.00711333	0.00720083	0.00646613	0.00692676	1.32703	0.000166354	0.00239546	2.16841	1.11664
276	4-Hydroxybenzoic acid	3.93	level1			137.024	193.9	NEG	C7H6O3	HMDB0000500	99-96-7	C00156	Shikimates and Phenylpropanoids	Phenolic acids (C6-C1)	Simple phenolic acids	FJKROLUGYXJWQN-UHFFFAOYSA-N	0.262795	0.281044	0.26795	0.270596	0.197605	0.192508	0.195182	0.195098	1.33025	0.000178575	0.00249088	0.720994	-0.471941
277	2'-O-methylcytidine	3.93	level1			258.108	185.5	POS	C10H15N3O5	HMDB0242132	2140-72-9		Carbohydrates	Nucleosides	Pyrimidine nucleos(t)ides	RFCQJGFZUQFYRF-ZOQUXTDFSA-N	0.0101737	0.01215	0.0110636	0.0111291	0.00834027	0.00864612	0.00698395	0.00799011	1.19854	0.0149067	0.0434844	0.717948	-0.478049
278	Adenine	3.93	level1			134.047	171.1	NEG	C5H5N5	HMDB0000034	73-24-5	C00147	Alkaloids	Pseudoalkaloids	Purine alkaloids	GFFGJBXGBJISGV-UHFFFAOYSA-N	6.22168	6.562	6.92377	6.56915	4.75737	4.60183	5.05506	4.80475	1.29722	0.00189363	0.0104622	0.731412	-0.451245
279	2-Hydroxyethanesulfonic acid	3.93	level1			124.991	158.6	NEG	C2H6O4S	HMDB0003903	107-36-8	C05123				SUMDYPCJJOFFON-UHFFFAOYSA-N	0.249042	0.272894	0.281199	0.267712	0.365867	0.372447	0.350644	0.362986	1.2964	0.00119794	0.00777432	1.35588	0.439234
281	Sph(d18:0)	3.93	level1			302.305	129.2	POS	C18H39NO2	HMDB0000269	764-22-7	C00836	Fatty acids	Sphingolipids	Sphingoid bases	OTKJDMGTUTTYMP-ZWKOTPCHSA-N	0.0432658	0.0390902	0.0462886	0.0428816	0.0825525	0.0874742	0.0956437	0.0885568	1.3203	0.000465472	0.00429066	2.06515	1.04625
282	Terminolic acid	3.93	level1			503.337	123.6	NEG	C30H48O6		564-13-6		Terpenoids	Triterpenoids	Oleanane triterpenoids	IDQVFXZQPGAVAM-GGVBUJAJSA-N	0.010111	0.0157641	0.0101967	0.0120239	0.0903661	0.0806414	0.103689	0.0915655	1.32469	0.000330197	0.00349628	7.61526	2.92889
283	(S)-Abscisic acid	3.93	level1			263.128	101	NEG	C15H20O4		7773-56-0		Terpenoids	Apocarotenoids	Apocarotenoids(ε-)	JLIDBLDQVAYHNE-IBPUIESWSA-N	0.336937	0.336183	0.346635	0.339918	0.388057	0.381745	0.369783	0.379861	1.28086	0.00322119	0.0148522	1.11751	0.160286
286	N-[2-(4-hydroxyphenyl)ethyl]acetamide	3.93	level1			180.101	46.6	POS	C10H13NO2		1202-66-0		Alkaloids	Tyrosine alkaloids	Phenylethylamines	ATDWJOOPFDQZNK-UHFFFAOYSA-N	0.00260049	0.00301554	0.00328324	0.00296642	0.00484827	0.00613955	0.00494131	0.00530971	1.26635	0.00705424	0.0254264	1.78994	0.839909
287	4-Methylquinolin-2-ol	3.93	level1			160.075	45.3	POS	C10H9NO		607-66-9		Alkaloids	Tryptophan alkaloids	Quinoline alkaloids	APLVPBUBDFWWAD-UHFFFAOYSA-N	0.00756546	0.00172655	0.00641025	0.00523409	0.0187678	0.0202444	0.0162371	0.0184164	1.12017	0.00349141	0.0156694	3.51856	1.81498
293	(1S,4aR,6aS,6bR,10R,11R,12aR,14bS)-1,10,11-trihydroxy-2,2,6a,6b,9,9,12a-heptamethyl-1,3,4,5,6,6a,7,8,8a,10,11,12,13,14b-tetradecahydropicene-4a-carboxylic acid	3.92	level1			487.342	448.3	NEG	C30H48O5		31298-06-3		Terpenoids	Triterpenoids	Oleanane triterpenoids	XJMYUPJDAFKICJ-SEAQMCRASA-N	0.0294846	0.0491338	0.0245851	0.0344012	2.02795	1.39271	2.84707	2.08924	1.32804	0.03946	0.0901502	60.7317	5.92438
294	Pinoresinol 4-O-β-D-glucopyranoside	3.92	level1			519.187	282.7	NEG	C26H32O11		69251-96-3		Shikimates and Phenylpropanoids	Lignans	Furofuranoid lignans	QLJNETOQFQXTLI-WMYFGKAISA-N	0.117139	0.13329	0.128268	0.126232	0.094229	0.093693	0.0958621	0.0945947	1.29478	0.0203991	0.0547786	0.74937	-0.416249
295	2'-O-Methylguanosine	3.92	level1			298.114	216.7	POS	C11H15N5O5		2140-71-8		Carbohydrates	Nucleosides	Purine nucleos(t)ides	OVYNGSFVYRPRCG-KQYNXXCUSA-N	0.00719849	0.00739046	0.00751884	0.00736926	0.0101064	0.00917063	0.00836396	0.00921367	1.19544	0.0227096	0.0592996	1.25028	0.322256
296	3-(carboxymethyl)benzoic acid	3.92	level1			179.035	263.4	NEG	C9H8O4		2084-13-1		Shikimates and Phenylpropanoids	Phenolic acids (C6-C1)	Simple phenolic acids	QNUWEXSGZVBMDV-UHFFFAOYSA-N	0.174486	0.155348	0.225252	0.185029	0.67666	0.634511	0.757209	0.68946	1.31933	0.000265382	0.0030839	3.72623	1.89772
297	4-(dimethylamino)butanoate	3.92	level1			130.087	52.8	NEG	C6H13NO2		693-11-8		Amino acids and Peptides	Small peptides	Aminoacids	OXOWTLDONRGYOT-UHFFFAOYSA-N	3.42893	3.63915	3.5397	3.53593	4.26718	4.47845	4.01079	4.25214	1.24837	0.00844814	0.0288991	1.20255	0.2661
298	Trehalose	3.92	level1			341.108	45.3	NEG	C12H22O11	HMDB0000975	99-20-7	C01083	Carbohydrates	Saccharides	Disaccharides	HDTRYLNUVZCQOY-LIZSDCNHSA-N	6.77195	7.235	7.1547	7.05388	7.84086	7.98499	8.38252	8.06946	1.23488	0.00929197	0.0309572	1.14397	0.194054
299	(3S,4R,5R)-1,3,4,5-tetrahydroxy-6-[(2S,3R,4S,5S,6R)-3,4,5-trihydroxy-6-(hydroxymethyl)tetrahydropyran-2-yl]oxy-hexan-2-one	3.92	level1			341.108	45.3	NEG	C12H22O11		13718-94-0		Carbohydrates	Saccharides	Disaccharides	RJPPRBMGVWEZRR-WTZPKTTFSA-N	6.77195	7.235	7.1547	7.05388	7.84086	7.98499	8.38252	8.06946	1.23488	0.00929197	0.0309572	1.14397	0.194054
300	N-Acetylglucosamine	3.92	level1			220.082	272.4	NEG	C8H15NO6	HMDB0062641	7512-17-6	C00140	Carbohydrates	Aminosugars and aminoglycosides	Aminosugars	MBLBDJOUHNCFQT-LXGUWJNJSA-N	0.129466	0.130171	0.134876	0.131504	0.163567	0.148432	0.175749	0.162583	1.20764	0.0183701	0.0507128	1.23633	0.306064
301	AKBA	3.92	level1			513.357	533.3	POS	C32H48O5		67416-61-9		Terpenoids	Triterpenoids	Serratane triterpenoids	HMMGKOVEOFBCAU-BCDBGHSCSA-N	0.00107226	0.000783422	0.00104065	0.000965445	0.00189315	0.00177911	0.00161506	0.00176244	1.2613	0.00283524	0.0136499	1.82552	0.868307
303	3'-O-methylcytidine	3.92	level1			258.108	185.5	POS	C10H15N3O5	HMDB0304396	20594-00-7		Carbohydrates	Nucleosides	Pyrimidine nucleos(t)ides	RZJCFLSPBDUNDH-UHFFFAOYSA-N	0.0101737	0.01215	0.0110636	0.0111291	0.00834027	0.00864612	0.00698395	0.00799011	1.19854	0.0149067	0.0434844	0.717948	-0.478049
304	(4aS,6aS,6bR,9R,10S,12aR,14bS)-10-hydroxy-9-(hydroxymethyl)-2,2,6a,6b,9,12a-hexamethyl-1,3,4,5,6,6a,7,8,8a,10,11,12,13,14b-tetradecahydropicene-4a-carboxylic acid	3.92	level1			471.347	495.8	NEG	C30H48O4		465-99-6		Terpenoids	Triterpenoids	Oleanane triterpenoids	PGOYMURMZNDHNS-XZTHESQKSA-N	0.0239093	0.0242926	0.0236856	0.0239625	0.220627	0.23717	0.278029	0.245276	1.33918	0.00588479	0.022429	10.2358	3.35555
305	Cholest-4-en-3-one	3.92	level1			385.345	622.8	POS	C27H44O	HMDB0000921	601-57-0	C00599	Terpenoids	Steroids	Cholestane steroids	NYOXRYYXRWJDKP-GYKMGIIDSA-N	0.208238	0.213255	0.200268	0.207254	0.367989	0.400752	0.515971	0.428237	1.28907	0.0380176	0.0876266	2.06625	1.04701
308	1-Myristoyl-sn-glycero-3-phosphocholine (LPC(14:0/0:0))	3.92	level1			468.307	478.8	POS	C22H46NO7P	HMDB0010379	20559-16-4		Fatty acids	Glycerophospholipids	Glycerophosphocholines	VXUOFDJKYGDUJI-OAQYLSRUSA-N	0.00421614	0.00448121	0.00433632	0.00434456	0.0106711	0.0106343	0.00947473	0.01026	1.33493	0.000121952	0.00202122	2.36159	1.23976
315	Royal jelly acid	3.92	level1			185.118	346.3	NEG	C10H18O3	HMDB0244269	14113-05-4		Fatty acids	Fatty Acids and Conjugates	Hydroxy fatty acids	QHBZHVUGQROELI-SOFGYWHQSA-N	0.180775	0.227909	0.209705	0.20613	0.065182	0.0597722	0.0552183	0.0600575	1.32949	0.000479648	0.00437339	0.291357	-1.77914
317	methyl (4S,5Z,6S)-6-[(2S,3R,4S,5R,6R)-3,5-dihydroxy-6-(hydroxymethyl)-4-[(2S,3R,4S,5S,6R)-3,4,5-trihydroxy-6-(hydroxymethyl)tetrahydropyran-2-yl]oxy-tetrahydropyran-2-yl]oxy-5-ethylidene-4-[2-[2-(4-hydroxyphenyl)ethoxy]-2-oxo-ethyl]-4H-pyran-3-carboxylate	3.92	level1			687.251	310.5	POS	C31H42O17				Terpenoids	Monoterpenoids	Secoiridoid monoterpenoids	IIEMULISLVWFNJ-DBTAZBLKSA-N	0.18481	0.131699	0.125115	0.147208	0.364506	0.328538	0.394747	0.362597	1.28762	0.00131842	0.00828338	2.46317	1.30051
319	2-(2-Butoxyethoxy)acetic acid	3.92	level1			175.097	270.3	NEG	C8H16O4		82941-26-2		Fatty acids	Fatty Acids and Conjugates		MCORDGVZLPBVJB-UHFFFAOYSA-N	0.0615137	0.0729014	0.0672287	0.0672146	0.0512385	0.0466644	0.0499804	0.0492944	1.25999	0.00730832	0.0260691	0.733389	-0.447349
321	Magnoloside F	3.92	level1			785.25	235.1	NEG	C35H46O20		1945997-27-2		Shikimates and Phenylpropanoids	Phenylpropanoids (C6-C3)	Cinnamic acids and derivatives	OTPHMDOQUOZGKS-GHJLPMDASA-N	0.0151989	0.0116924	0.0110887	0.01266	0.361296	0.332372	0.391067	0.361578	1.3387	0.00223876	0.0116752	28.5607	4.83596
322	(2R,3S,4S,5R,6R)-2-(hydroxymethyl)-6-[[(2R,3S,4S,5R,6R)-3,4,5-trihydroxy-6-pentan-2-yloxyoxan-2-yl]methoxy]oxane-3,4,5-triol	3.92	level1			393.176	232.5	NEG	C17H32O11				Fatty acids	Fatty acyl glycosides	Fatty acyl glycosides of mono- and disaccharides	CQYWFDMYHSTSJB-UHTTVHKDSA-N	0.177368	0.188144	0.123341	0.162951	0.369605	0.449117	0.235292	0.351338	1.14084	0.0452674	0.100072	2.15609	1.10842
325	Nicotinamide adenine dinucleotide (NAD)	3.92	level1			662.102	85.9	NEG	C21H28N7O14P2	HMDB0000902	53-84-9	C00003	Carbohydrates	Nucleosides	Purine nucleos(t)ides	BAWFJGJZGIEFAR-NNYOXOHSSA-O	0.00267922	0.00252834	0.00206895	0.0024255	0.00512059	0.00746169	0.00716396	0.00658208	1.28958	0.00539409	0.0211273	2.7137	1.44026
327	Alanine	3.92	level1			88.0404	51.7	NEG	C3H7NO2	HMDB0000161	56-41-7	C00041	Amino acids and Peptides	Small peptides	Aminoacids	QNAYBMKLOCPYGJ-REOHCLBHSA-N	0.161314	0.125895	0.146894	0.144701	0.19416	0.22125	0.188704	0.201371	1.18854	0.0169778	0.0478325	1.39164	0.476782
328	Sarcosine	3.92	level1			88.0404	51.7	NEG	C3H7NO2	HMDB0000271	107-97-1	C00213	Amino acids and Peptides	Small peptides	Aminoacids	FSYKKLYZXJSNPZ-UHFFFAOYSA-N	0.161314	0.125895	0.146894	0.144701	0.19416	0.22125	0.188704	0.201371	1.18854	0.0169778	0.0478325	1.39164	0.476782
329	Hygric acid	3.92	level1			130.086	47	POS	C6H11NO2	HMDB0094696	475-11-6	C22223	Alkaloids	Ornithine alkaloids	Pyrrolidine alkaloids	CWLQUGTUXBXTLF-YFKPBYRVSA-N	0.883888	0.881599	0.856737	0.874075	1.31526	1.3028	1.23822	1.28543	1.3335	8.51992e-05	0.00168258	1.47061	0.556419
330	Nortropine	3.92	level1			128.107	45.8	POS	C7H13NO		538-09-0		Alkaloids	Ornithine alkaloids	Tropane alkaloids	YYMCYJLIYNNOMK-MEKDEQNOSA-N	0.0737152	0.0638868	0.0661515	0.0679178	0.22199	0.235752	0.219068	0.225603	1.33719	1.1972e-05	0.000687211	3.32171	1.73193
332	PC(38:6)	3.92	level1			806.566	617.5	POS	C46H80NO8P							SQYNRGDZNLTJSW-SDGBSDMESA-N	0.0547501	0.0381476	0.0395933	0.0441637	0.0960143	0.0729633	0.0811642	0.0833806	1.22962	0.0102752	0.033241	1.88799	0.916852
333	Protoporphyrin IX	3.92	level1			563.264	536.6	POS	C34H34N4O4		553-12-8		Alkaloids			ZCFFYALKHPIRKJ-UHFFFAOYSA-N	0.00794588	0.007253	0.00764701	0.00761529	0.0327829	0.0382978	0.0305424	0.0338744	1.33544	0.00726605	0.0259691	4.4482	2.15322
334	Val-Ile	3.92	level1			229.155	218.8	NEG	C11H22N2O3	HMDB0029130	20556-14-3		Amino acids and Peptides	Small peptides	Dipeptides	PNVLWFYAPWAQMU-DJLDLDEBSA-N	0.628466	0.631259	0.634275	0.631334	0.92983	0.927422	0.887117	0.91479	1.33687	0.00210384	0.0112134	1.44898	0.535038
335	Glu-Glu	3.92	level1			277.102	477.9	POS	C10H16N2O7	HMDB0028818	3929-61-1	C01425	Amino acids and Peptides	Small peptides	Dipeptides	KOSRFJWDECSPRO-WDSKDSINSA-N	0.00367053	0.00428874	0.00331412	0.0037578	0.00941088	0.0101038	0.00869338	0.00940268	1.31867	0.000342195	0.00356945	2.50218	1.32318
336	N-Acetylglucosamine 1-phosphate	3.92	level1			300.048	460.7	NEG	C8H16NO9P	HMDB0001367	6866-69-9	C04256	Carbohydrates	Aminosugars and aminoglycosides	Aminosugars	FZLJPEPAYPUMMR-RTRLPJTCSA-N	0.0678216	0.0629629	0.0660297	0.0656047	0.141916	0.12575	0.130241	0.132636	1.33181	0.000182246	0.00251978	2.02174	1.0156
337	Glycerophosphocholine	3.92	level1			258.109	404	POS	C8H20NO6P	HMDB0000086	28319-77-9	C00670	Fatty acids	Glycerophospholipids	Glycerophosphocholines	SUHOQUVVVLNYQR-MRVPVSSYSA-N	6.80645	6.28241	6.58605	6.5583	16.9159	16.6726	15.6127	16.4004	1.33784	2.11798e-05	0.000872083	2.50071	1.32234
341	Methionine	3.92	level1			150.058	308.8	POS	C5H11NO2S	HMDB0033951	59-51-8	C01733	Amino acids and Peptides	Small peptides	Aminoacids	FFEARJCKVFRZRR-UHFFFAOYSA-N	0.0351975	0.0314717	0.0297402	0.0321364	0.114119	0.0859972	0.0745073	0.0915412	1.29794	0.0349785	0.08227	2.84852	1.51021
343	Methylguanidine	3.92	level1			74.0711	281.5	POS	C2H7N3	HMDB0001522	471-29-4	C02294	Alkaloids			CHJJGSNFBQVOTG-UHFFFAOYSA-N	0.016531	0.0152457	0.0163875	0.0160547	0.0543371	0.0548368	0.050951	0.053375	1.33929	8.40576e-06	0.000598453	3.32457	1.73317
344	Homovanillic acid sulfate	3.92	level1			261.007	264.3	NEG	C9H10O7S	HMDB0011719	38339-06-9		Shikimates and Phenylpropanoids	Phenolic acids (C6-C1)	Simple phenolic acids	IACOAKYXFIWAQN-UHFFFAOYSA-N	0.0344648	0.0335644	0.0357119	0.0345804	0.0680956	0.0628027	0.056325	0.0624078	1.31612	0.00129755	0.00819981	1.80472	0.851772
345	Riboflavin	3.92	level1			377.145	236	POS	C17H20N4O6	HMDB0000244	83-88-5	C00255	Alkaloids	Pseudoalkaloids	pteridine alkaloids	AUNGANRZJHBGPY-SCRDCRAPSA-N	0.0109235	0.0112593	0.0113326	0.0111718	0.0129419	0.0129439	0.0116069	0.0124976	1.10668	0.0457119	0.100822	1.11867	0.161787
346	LPC(16:0)	3.92	level1			496.339	234.9	POS	C24H50NO7P	HMDB0010382	17364-16-8		Fatty acids	Glycerophospholipids	Glycerophosphocholines	ASWBNKHCZGQVJV-HSZRJFAPSA-N	0.0150079	0.0152125	0.0132556	0.014492	0.0205303	0.0219032	0.0169241	0.0197859	1.16158	0.0302339	0.073707	1.3653	0.449213
349	Kynurenic acid	3.92	level1			188.035	203.9	NEG	C10H7NO3	HMDB0000715	492-27-3	C01717	Alkaloids	Anthranilic acid alkaloids	Acridone alkaloids	HCZHHEIFKROPDY-UHFFFAOYSA-N	0.114065	0.128718	0.124919	0.122567	0.00815355	0.00822554	0.00894083	0.00843997	1.34069	0.00143171	0.0087316	0.0688598	-3.86019
352	Hypoxanthine	3.92	level1			135.031	181.8	NEG	C5H4N4O	HMDB0000157	68-94-0	C00262	Alkaloids	Pseudoalkaloids	Purine alkaloids	FDGQSTZJBFJUBT-UHFFFAOYSA-N	0.330032	0.380908	0.375098	0.362013	0.234955	0.231193	0.218057	0.228069	1.31	0.0013638	0.00846716	0.630002	-0.666573
353	Creatinine	3.92	level1			114.066	181.6	POS	C4H7N3O	HMDB0000562	60-27-5	C00791	Alkaloids	Histidine alkaloids	Imidazole alkaloids	DDRJAANPRJIHGJ-UHFFFAOYSA-N	0.00474581	0.00425578	0.00360658	0.00420272	0.00837082	0.00818015	0.00802136	0.00819077	1.30464	0.000320102	0.00342859	1.94892	0.962675
355	1-Methylguanine	3.92	level1			166.072	171.5	POS	C6H7N5O	HMDB0003282	938-85-2	C04152	Alkaloids	Pseudoalkaloids	Purine alkaloids	RFLVMTUMFYRZCB-UHFFFAOYSA-N	0.125196	0.119193	0.124552	0.12298	0.142334	0.140947	0.137363	0.140215	1.28921	0.00202652	0.0109354	1.14014	0.189215
356	PE(34:2)	3.92	level1			716.52	170.2	POS	C39H74NO8P							NDGYJYRRMBQYAU-BQZPLEDQSA-N	1.20972	1.17686	1.22471	1.20376	1.90891	2.05443	1.94933	1.97089	1.33489	7.32622e-05	0.00155608	1.63727	0.711293
357	PE(18:0/18:2)	3.92	level1			742.538	167.8	NEG	C41H78NO8P	HMDB0008994	7266-53-7		Fatty acids	Glycerophospholipids	Glycerophosphoethanolamines	YDTWOEYVDRKKCR-KNERPIHHSA-N	0.13438	0.144796	0.153522	0.144233	0.240092	0.266688	0.271885	0.259555	1.31905	0.000518437	0.00458998	1.79956	0.847641
358	Taurodeoxycholic acid	3.92	level1			498.291	159.3	NEG	C26H45NO6S	HMDB0000896	516-50-7	C05463	Terpenoids	Steroids	Cholane steroids	AWDRATDZQPNJFN-VAYUFCLWSA-N	0.041431	0.0481203	0.046551	0.0453674	0.104611	0.107453	0.118317	0.110127	1.32989	0.000152731	0.00228439	2.42745	1.27944
359	LPG(18:1(9Z))	3.92	level1			509.288	158.5	NEG	C24H47O9P	HMDB0240602	326495-24-3		Fatty acids	Glycerophospholipids	Glycerophosphoglycerols	FQQQKGAFQIIGLQ-SNZQZGEVSA-N	0.149682	0.18408	0.173492	0.169085	0.295053	0.464246	0.395675	0.384991	1.26225	0.0126149	0.0385562	2.27692	1.18708
360	(2R,3S,4S,5R,6S)-2-(hydroxymethyl)-6-(2-hydroxyphenoxy)tetrahydropyran-3,4,5-triol	3.92	level1			271.082	146.5	NEG	C12H16O7		2400-71-7		Shikimates and Phenylpropanoids	Phenolic acids (C6-C1)	Simple phenolic acids	NMZWIAATAZXMRV-RMPHRYRLSA-N	0.55526	0.482621	0.569286	0.535722	0.175957	0.196601	0.161668	0.178075	1.32868	0.000238735	0.00289983	0.332402	-1.589
361	2-Ketobutyric acid	3.92	level1			101.024	98.6	NEG	C4H6O3	HMDB0000005	600-18-0	C00109	Fatty acids	Fatty Acids and Conjugates	Oxo fatty acids	TYEYBOSBBBHJIV-UHFFFAOYSA-N	11.5934	14.2405	14.2364	13.3567	34.4943	32.05	30.0026	32.1823	1.32019	0.000276852	0.00315392	2.40944	1.2687
362	Uracil	3.92	level1			111.02	82.4	NEG	C4H4N2O2	HMDB0000300	66-22-8	C00106	Alkaloids	Pseudoalkaloids	Purine alkaloids	ISAKRJDGNUQOIC-UHFFFAOYSA-N	2.0114	2.3938	2.24066	2.21529	3.32957	3.40906	3.29334	3.34399	1.30167	0.00062998	0.00517749	1.5095	0.594075
364	PG(18:1/18:1(9Z))	3.92	level1			773.531	60.8	NEG	C42H79O10P	HMDB0010634	67254-28-8		Fatty acids	Glycerophospholipids	Glycerophosphoglycerols	DSNRWDQKZIEDDB-SQYFZQSCSA-N	0.210275	0.271654	0.248635	0.243521	0.513082	0.584678	0.533638	0.543799	1.31332	0.000417355	0.00401539	2.23306	1.15903
365	13(S)-HpOTrE	3.92	level1			291.196	52.1	NEG	C18H30O4	HMDB0301803	67597-26-6	C04785	Fatty acids	Fatty Acids and Conjugates	Other Octadecanoids	UYQGVDXDXBAABN-FQSPHKRJSA-N	1.21312	1.63101	1.24692	1.36369	0.361058	0.36472	0.49398	0.406586	1.30722	0.00245728	0.0124096	0.298152	-1.74588
366	N-p-trans-Coumaroyltyramine	3.92	level1			284.127	48.8	POS	C17H17NO3	HMDB0039521	36417-86-4		Shikimates and Phenylpropanoids	Phenylpropanoids (C6-C3)	Cinnamic acid amides	RXGUTQNKCXHALN-BJMVGYQFSA-N	10.4956	9.45061	9.47877	9.80833	4.8905	5.14383	5.79325	5.27586	1.31644	0.000485165	0.00440286	0.537896	-0.894601
367	Diethyltoluamide	3.92	level1			192.138	34.3	POS	C12H17NO	HMDB0250930	134-62-3	C10935	Alkaloids			MMOXZBCLCQITDF-UHFFFAOYSA-N	0.0134051	0.0138697	0.0133466	0.0135405	0.0177118	0.0172239	0.014996	0.0166439	1.19104	0.0219269	0.057792	1.2292	0.297715
368	Ganoderitriol M	3.92	level1			473.363	31.8	NEG	C30H50O4		1265906-35-1		Terpenoids	Triterpenoids	Lanostane, Tirucallane and Euphane triterpenoids	XRNFKNZQPAWPQL-YFFZAEHLSA-N	4.57461	5.92524	5.439	5.31295	8.9851	8.18424	8.79604	8.65513	1.27403	0.00195371	0.010682	1.62906	0.704042
370	Benzoic acid	3.91	level1			121.029	123.5	NEG	C7H6O2	HMDB0001870	65-85-0	C00180	Shikimates and Phenylpropanoids	Phenolic acids (C6-C1)	Simple phenolic acids	WPYMKLBDIGXBTP-UHFFFAOYSA-N	1.9503	2.19151	2.00994	2.05058	4.06643	4.1089	3.84551	4.00695	1.33192	5.70742e-05	0.00137146	1.95405	0.966469
371	(1S,2R,4aS,6aS,6bR,9R,10S,11R,12aR,14bS)-10,11-dihydroxy-9-(hydroxymethyl)-1,2,6a,6b,9,12a-hexamethyl-2,3,4,5,6,6a,7,8,8a,10,11,12,13,14b-tetradecahydro-1H-picene-4a-carboxylic acid	3.91	level1			487.342	448.3	NEG	C30H48O5				Terpenoids	Triterpenoids	Ursane and Taraxastane triterpenoids	JXSVIVRDWWRQRT-SVCFHXMWSA-N	0.0294846	0.0491338	0.0245851	0.0344012	2.02795	1.39271	2.84707	2.08924	1.32804	0.03946	0.0901502	60.7317	5.92438
374	1-Methylguanosine	3.91	level1			298.114	216.7	POS	C11H15N5O5	HMDB0001563	2140-65-0		Carbohydrates	Nucleosides	Purine nucleos(t)ides	UTAIYTHAJQNQDW-KQYNXXCUSA-N	0.00719849	0.00739046	0.00751884	0.00736926	0.0101064	0.00917063	0.00836396	0.00921367	1.19544	0.0227096	0.0592996	1.25028	0.322256
377	2-Isopropylmalic acid	3.91	level1			175.061	215.9	NEG	C7H12O5	HMDB0000402	73142-75-3	C02504	Fatty acids	Fatty Acids and Conjugates	Dicarboxylic acids	BITYXLXUCSKTJS-UHFFFAOYSA-N	3.09275	3.6142	3.28547	3.33081	1.28038	1.3046	1.21104	1.26534	1.33412	0.000182366	0.00252041	0.37989	-1.39635
379	3-Pyridylacetic acid	3.91	level1			138.055	45.6	POS	C7H7NO2	HMDB0001538	501-81-5		Alkaloids	Nicotinic acid alkaloids	Pyridine alkaloids	WGNUNYPERJMVRM-UHFFFAOYSA-N	0.417793	0.38675	0.396084	0.400209	0.796712	0.801993	0.807844	0.802183	1.33853	2.06123e-06	0.000368593	2.00441	1.00318
380	(2R,3S,4R,5R)-2,3,4,5-tetrahydroxy-6-[(2R,3R,4S,5S,6R)-3,4,5-trihydroxy-6-(hydroxymethyl)tetrahydropyran-2-yl]oxy-hexanal	3.91	level1			341.108	45.3	NEG	C12H22O11		554-91-6		Carbohydrates	Saccharides	Disaccharides	AYRXSINWFIIFAE-UDKQPYHCSA-N	6.77195	7.235	7.1547	7.05388	7.84086	7.98499	8.38252	8.06946	1.23488	0.00929197	0.0309572	1.14397	0.194054
381	Sorbose	3.91	level1			203.052	43.1	POS	C6H12O6	HMDB0246950	87-79-6	C00247	Carbohydrates	Saccharides	Monosaccharides	BJHIKXHVCXFQLS-OTWZMJIISA-N	0.699653	0.770259	0.703672	0.724528	1.74844	1.82035	1.69623	1.75501	1.33691	1.73989e-05	0.000802331	2.42228	1.27636
382	1-[2-hydroxy-6-methyl-4-[(2S,3R,4S,5S,6R)-3,4,5-trihydroxy-6-(hydroxymethyl)tetrahydropyran-2-yl]oxy-phenyl]ethanone	3.91	level1			327.109	247.8	NEG	C15H20O8				Polyketides	Phloroglucinols	Acyl phloroglucinols	CFJLERBDXYGARW-TVKJYDDYSA-N	0.0588748	0.0597132	0.059816	0.059468	0.102896	0.0929503	0.1266	0.107482	1.28024	0.0404892	0.0919291	1.80739	0.853909
383	Pipecolic acid	3.91	level1			130.086	47	POS	C6H11NO2	HMDB0000716	3105-95-1	C00408	Amino acids and Peptides	Small peptides	Aminoacids	HXEACLLIILLPRG-YFKPBYRVSA-N	0.883888	0.881599	0.856737	0.874075	1.31526	1.3028	1.23822	1.28543	1.3335	8.51992e-05	0.00168258	1.47061	0.556419
384	Jervine	3.91	level1			426.299	300.6	POS	C27H39NO3		469-59-0	C10811	Alkaloids	Pseudoalkaloids	Steroidal alkaloids	CLEXYFLHGFJONT-DNMILWOZSA-N	0.042531	0.0197597	0.0294769	0.0305892	0.0911063	0.112979	0.118204	0.10743	1.26107	0.00192393	0.0105719	3.51201	1.8123
387	LPC(18:2/0:0)	3.91	level1			520.338	488.9	POS	C26H50NO7P	HMDB0010386	22252-07-9	C04100	Fatty acids	Glycerophospholipids	Glycerophosphocholines	SPJFYYJXNPEZDW-FTJOPAKQSA-N	2.25914	2.07919	2.08949	2.14261	5.97526	6.69225	5.44579	6.03777	1.33107	0.000440737	0.00415277	2.81795	1.49465
389	(1R,7R,10R)-4,10,11,11-tetramethyltricyclo[5.3.1.01,5]undec-4-en-3-one	3.91	level1			219.173	454.7	POS	C15H22O		3466-15-7		Terpenoids	Sesquiterpenoids	Patchoulane sesquiterpenoids	GIGKXOAUYMWORB-OSQNNJELSA-N	0.214976	0.273578	0.18901	0.225854	3.30298	2.98261	2.64753	2.97771	1.33526	0.00415042	0.0176401	13.1842	3.72074
394	8-hydroxy-6-methyl-2-(4-methylpent-3-enyl)octa-2,6-dienoic acid	3.91	level1			251.165	415	NEG	C15H24O3				Terpenoids	Monoterpenoids	Acyclic monoterpenoids	YYEOFIAPOAWEGY-UHFFFAOYSA-N	0.0449439	0.0403417	0.0360559	0.0404472	0.150428	0.155868	0.144235	0.150177	1.33461	1.30974e-05	0.000716095	3.71292	1.89255
398	Mitraphylline	3.91	level1			369.18	333.6	POS	C21H24N2O4		509-80-8	C09227	Alkaloids	Tryptophan alkaloids	Simple indole alkaloids	JMIAZDVHNCCPDM-DAFCLMLCSA-N	0.0284638	0.0217721	0.0202388	0.0234916	0.0682412	0.0715287	0.073006	0.0709253	1.31818	8.08171e-05	0.00163778	3.01918	1.59416
399	Butyllactate	3.91	level1			145.087	314.6	NEG	C7H14O3	HMDB0040254	138-22-7		Fatty acids	Fatty esters	Wax monoesters	MRABAEUHTLLEML-UHFFFAOYSA-N	0.193728	0.209721	0.21219	0.205213	0.25353	0.230759	0.227441	0.237243	1.14234	0.0331657	0.0790158	1.15608	0.209244
401	(1S,3R,4R,5R)-1,3,4-trihydroxy-5-[(E)-3-(3-hydroxy-4-methoxy-phenyl)prop-2-enoyl]oxy-cyclohexanecarboxylic acid	3.91	level1			367.103	258.5	NEG	C17H20O9				Shikimates and Phenylpropanoids	Phenylpropanoids (C6-C3)	Cinnamic acids and derivatives	ZHBZPCLRULAFBL-KJJWLSQTSA-N	0.084254	0.0884292	0.0909637	0.0878823	0.223277	0.207216	0.207358	0.212617	1.33759	2.54072e-05	0.000944794	2.41934	1.27461
403	Gly-Phe	3.91	level1			221.093	132	NEG	C11H14N2O3	HMDB0028848	721-66-4		Amino acids and Peptides	Small peptides	Dipeptides	JBCLFWXMTIKCCB-UHFFFAOYSA-N	0.117439	0.11762	0.114772	0.11661	0.137794	0.140182	0.137061	0.138346	1.33184	7.90169e-05	0.00162224	1.18639	0.246581
404	2-hydroxy-5-[(2S,3R,4S,5S,6R)-3,4,5-trihydroxy-6-(hydroxymethyl)tetrahydropyran-2-yl]oxy-benzoic acid	3.91	level1			315.072	106.9	NEG	C13H16O9		1820-89-9		Shikimates and Phenylpropanoids	Phenolic acids (C6-C1)	Simple phenolic acids	CBTFERBMQQAROP-BZNQNGANSA-N	0.289287	0.291113	0.287374	0.289258	0.44347	0.502702	0.409206	0.451792	1.29518	0.026931	0.0674196	1.5619	0.643302
406	Pilocarpine	3.91	level1			209.128	84.2	POS	C11H16N2O2		54-71-7	C07474|D00525	Alkaloids	Histidine alkaloids	Imidazole alkaloids	QCHFTSOMWOSFHM-WPRPVWTQSA-N	0.0432779	0.0374457	0.0386917	0.0398051	0.328235	0.330088	0.285828	0.314717	1.33894	0.00243616	0.0123332	7.90645	2.98303
407	3-Methoxytyramine	3.91	level1			168.101	60.4	POS	C9H13NO2	HMDB0000022	554-52-9	C05587	Alkaloids	Tyrosine alkaloids	Phenylethylamines	DIVQKHQLANKJQO-UHFFFAOYSA-N	0.215269	0.192916	0.215365	0.20785	0.274473	0.268666	0.261677	0.268272	1.28276	0.0019207	0.0105631	1.2907	0.368154
408	1-Aminocyclopropane-1-carboxylic acid	3.91	level1			100.04	52.7	NEG	C4H7NO2	HMDB0036458	22059-21-8	C01234	Amino acids and Peptides	Small peptides	Aminoacids	PAJPWUMXBYXFCZ-UHFFFAOYSA-N	0.18337	0.189709	0.182067	0.185049	0.573337	0.551541	0.530005	0.551628	1.33999	8.65488e-06	0.000606415	2.98099	1.57579
409	4-Hydroxyproline	3.91	level1			130.051	50.8	NEG	C5H9NO3	HMDB0000725	51-35-4	C01157	Amino acids and Peptides	Small peptides	Aminoacids	PMMYEEVYMWASQN-DMTCNVIQSA-N	0.199717	0.220199	0.203015	0.207644	0.317647	0.325593	0.317616	0.320286	1.32796	8.15438e-05	0.00164584	1.54247	0.625247
410	Threonic acid	3.91	level1			135.03	42.2	NEG	C4H8O5	HMDB0062620	7306-96-9	C01620	Fatty acids	Fatty Acids and Conjugates	Hydroxy fatty acids	JPIJQSOTBSSVTP-STHAYSLISA-N	0.23296	0.249746	0.248596	0.243767	0.220863	0.222912	0.214984	0.219586	1.20946	0.0149746	0.043626	0.900803	-0.150716
413	Glucose 1-phosphate	3.91	level1			259.022	474.5	NEG	C6H13O9P	HMDB0001586	59-56-3	C00103	Carbohydrates	Saccharides	Monosaccharides	HXXFSFRBOHSIMQ-GASJEMHNSA-N	0.0279318	0.0204643	0.0223016	0.0235659	0.0361445	0.0357779	0.0362726	0.036065	1.23338	0.0303533	0.0739033	1.53039	0.6139
414	gamma-Glutamylglutamine	3.91	level1			276.118	450.3	POS	C10H17N3O6	HMDB0011738	10148-81-9	C05283	Amino acids and Peptides	Small peptides	Dipeptides	JBFYFLXEJFQWMU-WDSKDSINSA-N	0.0982811	0.080895	0.0916585	0.0902782	0.322172	0.324635	0.305971	0.317593	1.33546	8.01123e-06	0.000588732	3.51793	1.81473
418	Methylsuccinic acid	3.91	level1			131.035	373.2	NEG	C5H8O4	HMDB0001844	498-21-5		Fatty acids	Fatty Acids and Conjugates	Dicarboxylic acids	WXUAQHNMJWJLTG-UHFFFAOYSA-N	0.0961783	0.100311	0.0975849	0.0980246	0.0625046	0.060857	0.0600431	0.0611349	1.33803	1.27777e-05	0.000708392	0.623669	-0.681148
420	Tryptophan	3.91	level1			205.096	284.8	POS	C11H12N2O2	HMDB0030396	73-22-3	C00078	Amino acids and Peptides	Small peptides	Aminoacids	QIVBCDIJIAJPQS-VIFPVBQESA-N	0.0437173	0.0279813	0.0302949	0.0339978	0.0819683	0.0711485	0.0714458	0.0748542	1.26211	0.00252251	0.0126224	2.20173	1.13864
421	Phe-Pro	3.91	level1			261.124	258.4	NEG	C14H18N2O3	HMDB0011177	7669-65-0		Amino acids and Peptides	Small peptides		WEQJQNWXCSUVMA-RYUDHWBXSA-N	0.0121296	0.0102991	0.0104366	0.0109551	0.0212218	0.0218806	0.0181176	0.0204067	1.30074	0.00190672	0.0105104	1.86275	0.897436
422	Val-Met	3.91	level1			247.112	221.5	NEG	C10H20N2O3S	HMDB0029133	14486-09-0		Amino acids and Peptides	Small peptides	Dipeptides	YSGSDAIMSCVPHG-JGVFFNPUSA-N	0.0662461	0.0580074	0.061449	0.0619008	0.0860959	0.0843473	0.0814795	0.0839742	1.29429	0.00129268	0.00817969	1.35659	0.439988
423	Phenylalanylphenylalanine	3.91	level1			313.154	176.9	POS	C18H20N2O3	HMDB0013302	2577-40-4		Amino acids and Peptides	Small peptides	Dipeptides	GKZIWHRNKRBEOH-HOTGVXAUSA-N	0.016075	0.0163979	0.0161532	0.0162087	0.0205299	0.0218929	0.0216875	0.0213701	1.32665	0.000289541	0.00323935	1.31843	0.398825
424	PC(33:2)	3.91	level1			744.551	168.3	POS	C41H78NO8P							ALHRVKWVHQGCAN-PBONVLCZSA-N	0.226937	0.232649	0.257882	0.239156	0.406658	0.435335	0.379976	0.407323	1.31346	0.000828767	0.00612633	1.70317	0.768222
425	PC(18:1(9Z)/18:1(9Z))	3.91	level1			786.597	165	POS	C44H84NO8P	HMDB0000593	4235-95-4		Fatty acids	Glycerophospholipids	Glycerophosphocholines	SNKAWJBJQDLSFF-AOMFJDGTSA-N	0.826279	0.837128	0.865281	0.842896	1.53753	1.65906	1.47404	1.55688	1.33187	0.000210682	0.00272871	1.84706	0.885231
427	Lauramine oxide	3.91	level1			230.247	159.7	POS	C14H31NO		1643-20-5		Fatty acids	Fatty acyls	Hydrocarbons	SYELZBGXAIXKHU-UHFFFAOYSA-N	0.388671	0.414471	0.448615	0.417253	0.289505	0.30784	0.269365	0.288904	1.28176	0.00338679	0.0153539	0.692395	-0.530333
428	Sph(t18:0)	3.91	level1			318.299	159.7	POS	C18H39NO3	HMDB0004610	554-62-1	C12144	Fatty acids	Sphingolipids	Sphingoid bases	AERBNCYCJBRYDG-KSZLIROESA-N	0.76153	0.722105	0.769979	0.751205	2.12716	2.09327	2.16248	2.12763	1.34026	6.3472e-07	0.000243812	2.83229	1.50197
430	PC(34:2)	3.91	level1			758.566	143.2	POS	C42H80NO8P							CKALBGXOWPPZRV-NSXUIHOUSA-N	1.45104	1.39383	1.3771	1.40732	1.80084	1.89842	1.75891	1.81939	1.31193	0.000933148	0.00663117	1.2928	0.3705
435	2-Ethylbutyric acid	3.9	level1			115.076	73.3	NEG	C6H12O2	HMDB0031221	88-09-5		Fatty acids	Fatty Acids and Conjugates	Branched fatty acids	OXQGTIUCKGYOAA-UHFFFAOYSA-N	0.893579	1.04674	0.973665	0.971327	0.728039	0.730978	0.707503	0.722173	1.27813	0.00513529	0.0204353	0.743492	-0.427612
436	8-hydroxy-4-(1-hydroxy-1-methyl-ethyl)-10-oxatricyclo[7.2.1.01,5]dodec-3-ene-8-carboxylic acid	3.9	level1			281.139	284.8	NEG	C15H22O5				Terpenoids	Diterpenoids		LKOCXGZSSYQSLN-UHFFFAOYSA-N	0.31116	0.378829	0.348074	0.346021	0.154934	0.162422	0.131085	0.14948	1.31377	0.000826951	0.00612076	0.431998	-1.2109
437	1,11-dihydroxy-1,2,6a,6b,9,9,12a-heptamethyl-10-oxo-3,4,5,6,6a,7,8,8a,11,12,13,14b-dodecahydro-2H-picene-4a-carboxylic acid	3.9	level1			485.327	463.8	NEG	C30H46O5		176983-21-4		Terpenoids	Triterpenoids	Ursane and Taraxastane triterpenoids	LJORXTIGOHMBOS-UHFFFAOYSA-N	0.00284378	0.0017862	0.00277238	0.00246745	0.133224	0.113728	0.22824	0.158397	1.33094	0.0477872	0.104208	64.1947	6.00438
438	Isobutyrylcarnitine (Car(4:0))	3.9	level1			214.143	97.8	POS	C11H21NO4	HMDB0000736	25518-49-4		Fatty acids	Fatty esters	Fatty acyl carnitines	LRCNOZRCYBNMEP-SECBINFHSA-O	0.0190074	0.0189153	0.018119	0.0186806	0.0689481	0.0622574	0.059889	0.0636982	1.3379	0.00332589	0.015165	3.40986	1.76971
440	beta-Alanine	3.9	level1			88.0404	51.7	NEG	C3H7NO2	HMDB0000056	107-95-9	C00099	Amino acids and Peptides	Small peptides	Aminoacids	UCMIRNVEIXFBKS-UHFFFAOYSA-N	0.161314	0.125895	0.146894	0.144701	0.19416	0.22125	0.188704	0.201371	1.18854	0.0169778	0.0478325	1.39164	0.476782
441	PC(18:1(6Z)/18:1(6Z))	3.9	level1			786.597	165	POS	C44H84NO8P		56391-91-4		Fatty acids	Glycerophospholipids	Glycerophosphocholines	KLJBLQFSKZACGJ-MMKOEKFTSA-N	0.826279	0.837128	0.865281	0.842896	1.53753	1.65906	1.47404	1.55688	1.33187	0.000210682	0.00272871	1.84706	0.885231
442	Vanillin	3.9	level1			151.04	275.7	NEG	C8H8O3	HMDB0012308	121-33-5	C00755	Shikimates and Phenylpropanoids	Phenolic acids (C6-C1)	Cinnamic acids and derivatives	MWOOGOJBHIARFG-UHFFFAOYSA-N	0.371319	0.376835	0.377432	0.375196	0.557198	0.54126	0.537045	0.545168	1.33851	1.22346e-05	0.000691953	1.45302	0.539057
443	PC(37:4)	3.9	level1			796.581	633.2	POS	C45H82NO8P							CBVSTGCTYPGQKV-SJHDXFTHSA-N	0.164967	0.156216	0.133251	0.151478	0.401949	0.290904	0.399749	0.364201	1.28929	0.00492968	0.019852	2.40431	1.26562
445	PC(36:6)	3.9	level1			778.534	589.5	POS	C44H76NO8P							OGQUENOVENTNRY-OCDRDTPKSA-N	0.136586	0.123247	0.110092	0.123308	0.551368	0.533078	0.47454	0.519662	1.33394	8.40441e-05	0.00167131	4.21434	2.07531
449	LPE(17:1)	3.9	level1			466.291	504.7	POS	C22H44NO7P				Fatty acids	Glycerophospholipids	Glycerophosphoethanolamines	LNJNONCNASQZOB-HEDKFQSOSA-N	0.0185795	0.0200771	0.0199291	0.0195286	0.0611429	0.0683328	0.0690072	0.066161	1.3378	5.35217e-05	0.00133407	3.38791	1.76039
450	LPE(18:3)	3.9	level1			476.275	474.2	POS	C23H42NO7P	HMDB0011508			Fatty acids	Glycerophospholipids	Glycerophosphoethanolamines	QULMFYLWLOKODU-CSLWLMPESA-N	0.170341	0.161097	0.179599	0.170346	0.454477	0.463875	0.416662	0.445005	1.33553	5.78629e-05	0.00138077	2.61236	1.38536
451	4-[(2R,2'S,3'R,4'aS,6'R)-2',3',4-trihydroxy-1',1',4'a,6'-tetramethyl-6-oxo-spiro[3,8-dihydrofuro[2,3-e]isoindole-2,5'-decalin]-7-yl]butanoic acid	3.9	level1			486.248	394.3	NEG	C27H37NO7				Terpenoids	Meroterpenoids	Spriromeroterpenoids	WENVIACWNHYPLR-KUNUJKOTSA-N	0.0220335	0.0235388	0.0262621	0.0239448	0.0311518	0.0299664	0.0283748	0.029831	1.18868	0.0162916	0.0464216	1.24582	0.3171
453	1-hydroxy-1-(hydroxymethyl)-8,8-dimethyl-2-oxo-4a,6a,7,9-tetrahydro-4H-pentaleno[1,6a-c]pyran-5-carboxylic acid	3.9	level1			295.118	313.3	NEG	C15H20O6				Terpenoids	Sesquiterpenoids	Pentalenane sesquiterpenoids	JKCIUIFXYRQALX-UHFFFAOYSA-N	0.062507	0.0360824	0.0471971	0.0485955	0.347291	0.334362	0.294965	0.32554	1.32189	9.31992e-05	0.00176024	6.69897	2.74394
454	N-Acetyltryptophan	3.9	level1			245.093	278.9	NEG	C13H14N2O3	HMDB0013713	1218-34-4	C03137	Amino acids and Peptides	Small peptides	Dipeptides	DZTHIGRZJZPRDV-LBPRGKRZSA-N	18.1531	21.5071	20.9653	20.2085	0.15827	0.137757	0.135424	0.143817	1.34096	0.0026723	0.0131157	0.00711666	-7.13458
455	Acanthoside B	3.9	level1			579.208	277.6	NEG	C28H36O13		7374-79-0	C10890	Shikimates and Phenylpropanoids	Lignans	Furofuranoid lignans	WEKCEGQSIIQPAQ-IRBNZIFYSA-N	0.58163	0.616356	0.590955	0.596314	0.459024	0.467693	0.462649	0.463122	1.32771	0.000237454	0.002889	0.776642	-0.364679
457	(2Z,4E)-5-[8-hydroxy-1,5-dimethyl-3-[(2R,3R,4S,5S,6R)-3,4,5-trihydroxy-6-(hydroxymethyl)oxan-2-yl]oxy-6-oxabicyclo[3.2.1]octan-8-yl]-3-methylpenta-2,4-dienoic acid	3.9	level1			425.182	259.3	NEG	C21H32O10				Terpenoids	Apocarotenoids	Apocarotenoids(ε-)	UHHVHDDICOEBTQ-ANHSACEGSA-N	0.116564	0.126429	0.121277	0.121423	0.426682	0.388502	0.347129	0.387437	1.33332	0.00670577	0.0245682	3.1908	1.67392
458	2-hydroxy-3,4-dimethoxy-benzoic acid	3.9	level1			197.045	256.5	NEG	C9H10O5		5653-46-3		Shikimates and Phenylpropanoids	Phenolic acids (C6-C1)	Simple phenolic acids	CJFQIVAOBBTJCI-UHFFFAOYSA-N	0.161548	0.178887	0.168276	0.16957	0.741379	0.816924	0.702238	0.753513	1.33822	0.00277829	0.0134626	4.44366	2.15175
459	2-Phenylacetamide	3.9	level1			136.075	251.1	POS	C8H9NO	HMDB0010715	103-81-1	C02505	Alkaloids	Peptide alkaloids	Simple amide alkaloids	LSBDFXRDZJMBSC-UHFFFAOYSA-N	0.0252945	0.0286484	0.026977	0.0269733	0.0200732	0.0189317	0.0176671	0.0188907	1.2887	0.0024672	0.0124417	0.700347	-0.513857
462	3-methoxy-4-[3,4,5-trihydroxy-6-(hydroxymethyl)tetrahydropyran-2-yl]oxy-benzoic acid	3.9	level1			329.088	207.3	NEG	C14H18O9				Shikimates and Phenylpropanoids	Phenolic acids (C6-C1)	Simple phenolic acids	JYFOSWJYZIVJPO-UHFFFAOYSA-N	0.869295	0.825541	0.83836	0.844399	1.76024	1.75754	1.62412	1.71397	1.33652	4.92584e-05	0.0012792	2.02981	1.02134
463	2'-Deoxyuridine	3.9	level1			227.067	96.8	NEG	C9H12N2O5	HMDB0000012	951-78-0	C00526	Carbohydrates	Nucleosides	Pyrimidine nucleos(t)ides	MXHRCPNRJAMMIM-SHYZEUOFSA-N	0.0363375	0.0420801	0.0375118	0.0386431	0.0583869	0.060791	0.0575852	0.058921	1.30935	0.000531675	0.00466195	1.52475	0.608571
464	2-Aminopurine	3.9	level1			136.061	82.8	POS	C5H5N5	HMDB0245025	452-06-2		Alkaloids	Pseudoalkaloids	Purine alkaloids	MWBWWFOAEOYUST-UHFFFAOYSA-N	1.88867	1.75188	1.97408	1.87154	1.58985	1.53047	1.59696	1.57243	1.23222	0.0117383	0.0366049	0.840177	-0.251234
465	Threonine	3.9	level1			120.065	47.6	POS	C4H9NO3	HMDB0000167	72-19-5	C00188	Amino acids and Peptides	Small peptides	Aminoacids	AYFVYJQAPQTCCC-GBXIJSLDSA-N	0.199428	0.186498	0.20004	0.195322	0.166369	0.169535	0.134414	0.156773	1.10238	0.0329664	0.0786422	0.802638	-0.317179
466	Betaine	3.9	level1			118.086	46.7	POS	C5H11NO2	HMDB0000043	107-43-7	C00719	Amino acids and Peptides	Small peptides	Aminoacids	KWIUHFFTVRNATP-UHFFFAOYSA-N	4.44467	4.25147	4.38628	4.36081	6.21144	6.20732	5.90586	6.1082	1.33093	0.000114081	0.00195743	1.4007	0.486153
467	Stachydrine	3.9	level1			144.101	45.9	POS	C7H13NO2	HMDB0004827	4136-37-2	C10172	Alkaloids	Ornithine alkaloids	Pyrrolidine alkaloids	CMUNUTVVOOHQPW-LURJTMIESA-N	0.284117	0.277169	0.278131	0.279806	0.442691	0.441689	0.410847	0.431742	1.33221	0.000141544	0.00219502	1.54301	0.625745
468	N-Methyl-L-asparagine	3.9	level1			145.062	42.2	NEG	C5H10N2O3		7175-34-0		Amino acids and Peptides	Small peptides	Aminoacids	CFRMVEKWKKDNAH-VKHMYHEASA-N	1.69221	1.64413	1.76405	1.70013	2.38096	2.40786	2.37043	2.38642	1.33133	4.75502e-05	0.00125916	1.40367	0.489201
469	PC(38:5)	3.9	level1			808.581	636.8	POS	C46H82NO8P							XYENHPHHRQBACY-CRPNVZFMSA-N	0.0473821	0.027158	0.0152684	0.0299362	0.15056	0.0967646	0.101086	0.116137	1.20236	0.0117881	0.0367137	3.87947	1.95586
471	(2S,3R,4S,5S,6R)-2-[4-[(3S,3aR,6S,6aR)-6-[3,5-dimethoxy-4-[(2S,3R,4S,5S,6R)-3,4,5-trihydroxy-6-(hydroxymethyl)tetrahydropyran-2-yl]oxy-phenyl]-1,3,3a,4,6,6a-hexahydrofuro[3,4-c]furan-3-yl]-2,6-dimethoxy-phenoxy]-6-(hydroxymethyl)tetrahydropyran-3,4,5-triol	3.9	level1			741.26	278.1	NEG	C34H46O18		573-44-4		Shikimates and Phenylpropanoids	Lignans	Furofuranoid lignans	FFDULTAFAQRACT-XKBSQSBASA-N	0.031456	0.0299308	0.0319894	0.0311254	0.0385435	0.0378741	0.0395612	0.0386596	1.31044	0.000668656	0.00537036	1.24206	0.312734
472	gamma-Glutamylglutamic acid	3.9	level1			275.088	476.4	NEG	C10H16N2O7	HMDB0011737	1116-22-9	C05282	Amino acids and Peptides	Small peptides	Dipeptides	OWQDWQKWSLFFFR-WDSKDSINSA-N	0.00466131	0.00639709	0.00753504	0.00619781	0.0125371	0.016657	0.0123814	0.0138585	1.23716	0.00931694	0.0310134	2.23603	1.16094
473	Ala-Glu	3.9	level1			217.083	427.7	NEG	C8H14N2O5	HMDB0028686	13187-90-1	C20957	Amino acids and Peptides	Small peptides	Dipeptides	VYZAGTDAHUIRQA-WHFBIAKZSA-N	0.0125346	0.0137541	0.0142637	0.0135175	0.0240099	0.0285365	0.0363218	0.0296227	1.27523	0.0439287	0.0978515	2.19144	1.13188
474	Prolylalanine	3.9	level1			187.107	353.9	POS	C8H14N2O3	HMDB0029010	6422-36-2		Amino acids and Peptides	Small peptides	Dipeptides	FELJDCNGZFDUNR-UHFFFAOYSA-N	0.0186612	0.0184495	0.0172251	0.0181119	0.0225223	0.0228725	0.0215385	0.0223111	1.28695	0.00219163	0.0115128	1.23185	0.300822
475	6-Hydroxynicotinic acid	3.9	level1			138.019	315.3	NEG	C6H5NO3	HMDB0002658	5006-66-6	C01020	Alkaloids	Nicotinic acid alkaloids	Pyridine alkaloids	BLHCMGRVFXRYRN-UHFFFAOYSA-N	0.023633	0.0256183	0.0248784	0.0247099	0.0301665	0.0329489	0.0318715	0.0316623	1.29174	0.00221369	0.0115945	1.28136	0.357677
476	Urocanic acid	3.9	level1			137.035	308.7	NEG	C6H6N2O2	HMDB0000301	104-98-3	C00785	Alkaloids			LOIYMIARKYCTBW-OWOJBTEDSA-N	0.0229935	0.0256829	0.0185376	0.0224047	0.0393344	0.0463431	0.0429931	0.0428902	1.27614	0.00213153	0.0113024	1.91434	0.936848
477	Tyramine	3.9	level1			138.091	240.7	POS	C8H11NO	HMDB0000306	51-67-2	C00483	Alkaloids	Tyrosine alkaloids	Phenylethylamines	DZGWFCGJZKJUFP-UHFFFAOYSA-N	0.147321	0.0844529	0.14972	0.127165	0.80513	0.729044	0.783462	0.772545	1.31329	3.19619e-05	0.00104799	6.07515	2.60292
478	Val-Val	3.9	level1			215.14	234.1	NEG	C10H20N2O3	HMDB0029140	3918-94-3		Amino acids and Peptides	Small peptides	Dipeptides	KRNYOVHEKOBTEF-UHFFFAOYSA-N	0.100937	0.0978763	0.103468	0.10076	0.164763	0.165228	0.154724	0.161572	1.33294	8.80982e-05	0.00171148	1.60353	0.681248
479	Phe-Ala	3.9	level1			235.108	229.5	NEG	C12H16N2O3	HMDB0028988	3918-87-4		Amino acids and Peptides	Small peptides	Dipeptides	MIDZLCFIAINOQN-WPRPVWTQSA-N	0.0144702	0.0134434	0.0135921	0.0138352	0.0116346	0.0105043	0.0128575	0.0116655	1.08803	0.0446416	0.0990548	0.843172	-0.2461
480	Isoverticine	3.9	level1			432.346	201.5	POS	C27H45NO3		23496-43-7		Alkaloids	Pseudoalkaloids	Steroidal alkaloids	IUKLSMSEHKDIIP-RZNVUHDWSA-N	0.00551621	0.00534362	0.00604633	0.00563539	0.0928875	0.089365	0.0771137	0.0864554	1.33984	0.00342796	0.0154735	15.3415	3.93937
481	PC(18:0/14:0)	3.9	level1			734.567	169.6	POS	C40H80NO8P	HMDB0008031	20664-02-2		Fatty acids	Glycerophospholipids	Glycerophosphocholines	MZWGYEJOZNRLQE-KXQOOQHDSA-N	0.0489475	0.0480418	0.0551267	0.0507053	0.0694206	0.0760248	0.0762848	0.0739101	1.29166	0.00183609	0.0102572	1.45764	0.543634
482	PC(34:4)	3.9	level1			754.535	167.6	POS	C42H76NO8P							PUEZCLOAQGFTCJ-YHTOTGLMSA-N	0.0656556	0.064897	0.0676091	0.0660539	0.0895856	0.093081	0.0849365	0.089201	1.31691	0.00074901	0.00577032	1.35043	0.433416
483	Ferulate	3.9	level1			193.05	166.2	NEG	C10H10O4	HMDB0000954	537-98-4	C01494	Shikimates and Phenylpropanoids	Phenylpropanoids (C6-C3)	Cinnamic acids and derivatives	KSEBMYQBYZTDHS-HWKANZROSA-N	0.532153	0.458601	0.489508	0.49342	0.705762	0.625947	0.706376	0.679362	1.25845	0.00554013	0.0215106	1.37684	0.461363
484	(Z)-9,12,13-trihydroxyoctadec-15-enoic acid	3.9	level1			329.233	153	NEG	C18H34O5				Fatty acids	Fatty Acids and Conjugates	Hydroxy fatty acids	DNWUYCUUEGGVPR-CLTKARDFSA-N	25.9625	29.3661	27.3927	27.5738	16.4519	15.8569	14.8263	15.7117	1.32318	0.000412044	0.00398143	0.569805	-0.811459
486	(2S,3R,4S,5S,6R)-2-(4-hydroxy-3-methoxy-phenoxy)-6-(hydroxymethyl)tetrahydropyran-3,4,5-triol	3.9	level1			301.092	148	NEG	C13H18O8		109194-60-7					KWVHACHAQJFTLZ-UJPOAAIJSA-N	0.605369	0.470993	0.597438	0.557933	0.928877	0.867905	0.889292	0.895358	1.26562	0.00200199	0.0108464	1.60478	0.682372
487	Pyruvate	3.9	level1			87.0086	136.1	NEG	C3H4O3	HMDB0000243	127-17-3	C00022	Fatty acids	Fatty Acids and Conjugates	Oxo fatty acids	LCTONWCANYUPML-UHFFFAOYSA-N	27.5082	25.9575	25.581	26.3489	40.0357	36.5432	38.0142	38.1977	1.31864	0.000538015	0.00469885	1.44969	0.535743
488	N6-Methyladenosine	3.9	level1			282.119	132.4	POS	C11H15N5O4	HMDB0004044	1867-73-8		Carbohydrates	Nucleosides	Purine nucleos(t)ides	VQAYFKKCNSOZKM-IOSLPCCCSA-N	0.0280564	0.0275106	0.0275962	0.0277211	0.0436054	0.0505178	0.0411195	0.0450809	1.30035	0.0248902	0.0635172	1.62623	0.701535
489	[(2S,3R,4S,5S,6R)-3,4,5-trihydroxy-6-(hydroxymethyl)tetrahydropyran-2-yl] (E)-3-(4-hydroxy-3-methoxy-phenyl)prop-2-enoate	3.9	level1			355.103	127.7	NEG	C16H20O9		7196-71-6	C17759	Shikimates and Phenylpropanoids	Phenylpropanoids (C6-C3)	Cinnamic acids and derivatives	JWRQVQWBNRGGPK-PMQCXRHVSA-N	0.371556	0.245902	0.302488	0.306649	0.827085	0.724579	0.915571	0.822412	1.29311	0.00145314	0.00881816	2.68193	1.42327
491	2-aminopyridin-3-ol	3.9	level1			109.041	69.2	NEG	C5H6N2O		16867-03-1		Amino acids and Peptides	Small peptides	Aminoacids	BMTSZVZQNMNPCT-UHFFFAOYSA-N	0.233028	0.180978	0.224023	0.212676	0.649779	0.638348	0.524451	0.604192	1.31552	0.000815042	0.00606499	2.8409	1.50635
492	Veratramine	3.9	level1			410.305	53.9	POS	C27H39NO2		60-70-8	C10829	Alkaloids	Pseudoalkaloids	Steroidal alkaloids	MALFODICFSIXPO-KFKQDBFTSA-N	0.0341234	0.0313158	0.0376658	0.0343683	0.124539	0.146394	0.12623	0.132388	1.33352	0.000173853	0.00245276	3.85202	1.94562
493	Brevicuspisaponin 2	3.9	level1			485.327	53.2	NEG	C30H48O6		287716-32-9		Terpenoids	Triterpenoids	Ursane and Taraxastane triterpenoids	MDDPTIWFHAUVPJ-AEJFXDJYSA-N	0.0211688	0.0209106	0.0184468	0.0201754	0.0688964	0.0658773	0.0935567	0.0761101	1.32017	0.0227957	0.0594615	3.77243	1.91549
494	Caprolactam	3.9	level1			114.091	41.3	POS	C6H11NO	HMDB0062769	105-60-2	C06593	Alkaloids	Lysine alkaloids	Piperidine alkaloids	JBKVHLHDHHXQEQ-UHFFFAOYSA-N	0.0161763	0.0222924	0.0250567	0.0211751	0.00341134	0.00334365	0.00181535	0.00285678	1.3039	0.00237969	0.0121479	0.134912	-2.88991
495	NAE(18:2)	3.9	level1			324.289	35.6	POS	C20H37NO2	HMDB0012252	68171-52-8		Fatty acids	Fatty amides	N-acyl ethanolamines (endocannabinoids)	KQXDGUVSAAQARU-HZJYTTRNSA-N	0.0290288	0.0337398	0.0262248	0.0296645	0.0431863	0.0406001	0.0437915	0.042526	1.23662	0.00585956	0.022366	1.43357	0.519609
497	Diglycine	3.89	level1			131.046	42	NEG	C4H8N2O3	HMDB0011733	556-50-3	C02037	Amino acids and Peptides	Small peptides	Dipeptides	YMAWOPBAYDPSLA-UHFFFAOYSA-N	1.41276	1.45703	1.46724	1.44568	2.19113	2.17887	2.08601	2.152	1.33518	4.51278e-05	0.00122419	1.48858	0.573933
501	Melibiose	3.89	level1			341.108	45.3	NEG	C12H22O11	HMDB0000048	60033-03-6	C05402	Carbohydrates	Saccharides	Disaccharides	DLRVVLDZNNYCBX-CQHUIXDMSA-N	6.77195	7.235	7.1547	7.05388	7.84086	7.98499	8.38252	8.06946	1.23488	0.00929197	0.0309572	1.14397	0.194054
504	5-Aminolevulinic acid	3.89	level1			130.051	50.8	NEG	C5H9NO3	HMDB0001149	106-60-5	C00430	Amino acids and Peptides	Small peptides	Aminoacids	ZGXJTSGNIOSYLO-UHFFFAOYSA-N	0.199717	0.220199	0.203015	0.207644	0.317647	0.325593	0.317616	0.320286	1.32796	8.15438e-05	0.00164584	1.54247	0.625247
505	(E,9S,12S,13S)-9,12,13-trihydroxyoctadec-10-enoic acid	3.89	level1			329.233	153	NEG	C18H34O5		97134-11-7	C14833	Fatty acids	Octadecanoids	Other Octadecanoids	MDIUMSLCYIJBQC-MVFSOIOZSA-N	25.9625	29.3661	27.3927	27.5738	16.4519	15.8569	14.8263	15.7117	1.32318	0.000412044	0.00398143	0.569805	-0.811459
507	LPE(20:3)	3.89	level1			504.307	504.1	POS	C25H46NO7P	HMDB0011515			Fatty acids	Glycerophospholipids	Glycerophosphoethanolamines	YBDFPZJQBYCWBA-WMTBOZPISA-N	0.00301931	0.00357529	0.00362977	0.00340812	0.00829459	0.0071622	0.00762415	0.00769365	1.32045	0.000360404	0.00368349	2.25744	1.17469
509	PC(8:0/8:0)	3.89	level1			492.307	458.1	POS	C24H48NO8P		19191-91-4		Fatty acids	Glycerophospholipids	Glycerophosphocholines	YHIXRNNWDBPKPW-JOCHJYFZSA-N	0.00141294	0.00247002	0.00159986	0.0018276	0.0105446	0.00847858	0.00751852	0.00884725	1.30281	0.00179123	0.0100991	4.8409	2.27527
511	Isophorone	3.89	level1			139.111	355.4	POS	C9H14O	HMDB0031195	78-59-1	C14743	Terpenoids	Apocarotenoids	Apocarotenoids(ε-)	HJOVHMDZYOCNQW-UHFFFAOYSA-N	0.0141875	0.0149737	0.0146294	0.0145969	0.00972728	0.0096013	0.00836534	0.00923131	1.30997	0.000396599	0.00389163	0.632417	-0.661051
513	2-(4-Hydroxy-4,8-dimethyl-6-oxo-7-propan-2-yl-1-bicyclo[3.2.1]octanyl)acetic acid	3.89	level1			267.16	321.2	NEG	C15H24O4				Terpenoids	Sesquiterpenoids	Cadinane sesquiterpenoids	CQETYAKZUYZHOB-UHFFFAOYSA-N	0.0489278	0.0549052	0.0471024	0.0503118	0.172467	0.1667	0.163603	0.16759	1.33721	4.76837e-06	0.000492516	3.33102	1.73597
515	Veratraldehyde	3.89	level1			167.07	284.8	POS	C9H10O3	HMDB0032138	120-14-9	C02201	Shikimates and Phenylpropanoids	Phenylpropanoids (C6-C3)	Cinnamic acids and derivatives	WJUFSDZVCOTFON-UHFFFAOYSA-N	0.0667486	0.0590568	0.0628352	0.0628802	0.128799	0.119009	0.115458	0.121089	1.32715	0.000218037	0.00277804	1.92571	0.945389
516	7-hydroxy-3-(hydroxymethyl)-5-methyl-isochromen-1-one	3.89	level1			207.064	284	POS	C11H10O4				Shikimates and Phenylpropanoids	Coumarins	Isocoumarins	LTGJEIZAUFPWTC-UHFFFAOYSA-N	0.0980199	0.0868784	0.0831209	0.0893397	0.00959276	0.0175446	0.0134342	0.0135239	1.31767	0.000112766	0.0019468	0.151376	-2.7238
517	Benzamide	3.89	level1			122.06	238.8	POS	C7H7NO	HMDB0004461	55-21-0	C09815	Alkaloids	Peptide alkaloids	Simple amide alkaloids	KXDAEFPNCMNJSK-UHFFFAOYSA-N	0.00968145	0.00939595	0.0100887	0.00972202	0.00833732	0.00857011	0.0079319	0.00827978	1.25339	0.00625295	0.0234007	0.851652	-0.231664
519	3,5-dimethoxy-4-[(2S,3R,4S,5S,6R)-3,4,5-trihydroxy-6-(hydroxymethyl)tetrahydropyran-2-yl]oxy-benzoic acid	3.89	level1			359.098	214.6	NEG	C15H20O10		33228-65-8		Shikimates and Phenylpropanoids	Phenolic acids (C6-C1)	Simple phenolic acids	BLKMDORKRDACEI-OVKLUEDNSA-N	0.724847	0.760909	0.749834	0.745196	0.978407	1.05892	1.18253	1.07329	1.28009	0.00554366	0.0215203	1.44027	0.526341
520	4-Oxohexanoic acid	3.89	level1			129.056	197.5	NEG	C6H10O3		1117-74-4		Fatty acids	Fatty Acids and Conjugates	Oxo fatty acids	CLJBDOUIEHLLEN-UHFFFAOYSA-N	2.39384	2.64397	2.59574	2.54452	3.41878	3.5788	3.28065	3.42608	1.29685	0.00157139	0.00927148	1.34645	0.429166
521	5,10-methylene-THF	3.89	level1			456.163	135.5	NEG	C20H23N7O6	HMDB0001533	31690-11-6	C00143	Alkaloids	Histidine alkaloids	Imidazole alkaloids	QYNUQALWYRSVHF-PZORYLMUSA-N	0.0112742	0.00971274	0.011145	0.0107107	0.017439	0.0156917	0.0168849	0.0166718	1.29862	0.00115186	0.00757209	1.55657	0.638367
522	N-Acetylputrescine	3.89	level1			131.117	46.2	POS	C6H14N2O	HMDB0002064	18233-70-0	C02714	Alkaloids	Ornithine alkaloids	Polyamines	KLZGKIDSEJWEDW-UHFFFAOYSA-N	0.0525779	0.0494974	0.0517444	0.0512732	0.110799	0.11087	0.0935364	0.105068	1.32341	0.00986712	0.0322931	2.04919	1.03505
523	PC(34:3)	3.89	level1			756.55	629.3	POS	C42H78NO8P	HMDB0007881			Fatty acids	Glycerophospholipids	Glycerophosphocholines	XWHIBISICRMDDW-ZLBNXBDKSA-N	1.30837	1.37829	1.254	1.31355	6.48244	6.01289	5.98068	6.15867	1.3399	8.22178e-06	0.000593436	4.68856	2.22914
525	Tomatine	3.89	level1			1034.55	308.1	POS	C50H83NO21	HMDB0034103	17406-45-0	C10827	Alkaloids	Pseudoalkaloids	Steroidal alkaloids	REJLGAUYTKNVJM-UHFFFAOYSA-N	10.3323	10.3073	10.4548	10.3648	12.5698	12.3545	11.9404	12.2882	1.31908	0.000538438	0.00469982	1.18557	0.245582
526	UDP-N-acetylglucosamine	3.89	level1			606.073	447.4	NEG	C17H27N3O17P2	HMDB0000290	528-04-1	C00043	Carbohydrates	Aminosugars and aminoglycosides	Aminosugars	LFTYTUAZOPRMMI-CFRASDGPSA-N	0.000664381	0.000321972	0.000638901	0.000541751	0.00376712	0.00539527	0.00444929	0.00453723	1.30523	0.0011815	0.00769975	8.37512	3.06611
527	Arg-Ala	3.89	level1			246.155	440.2	POS	C9H19N5O3	HMDB0028702	40968-45-4		Amino acids and Peptides	Small peptides	Dipeptides	WVRUNFYJIHNFKD-WDSKDSINSA-N	0.109881	0.0976805	0.106954	0.104839	0.176814	0.172751	0.201636	0.183734	1.31163	0.00126669	0.008067	1.75254	0.809444
530	3-Hydroxypyruvic acid	3.89	level1			103.003	409.6	NEG	C3H4O4	HMDB0001352	1113-60-6	C00168	Fatty acids	Fatty Acids and Conjugates		HHDDCCUIIUWNGJ-UHFFFAOYSA-N	10.2034	11.2521	10.7489	10.7348	7.91101	7.67579	7.97953	7.85544	1.31641	0.000809222	0.00603899	0.731771	-0.450535
531	Pyruvaldehyde	3.89	level1			71.0138	393	NEG	C3H4O2	HMDB0001167	78-98-8	C00546	Fatty acids	Fatty acyls	Fatty aldehydes	AIJULSRZWUXGPQ-UHFFFAOYSA-N	0.41237	0.442183	0.433975	0.429509	0.285517	0.279073	0.269283	0.277958	1.33135	0.000113416	0.00195254	0.647152	-0.627824
532	Allantoic acid	3.89	level1			177.061	377.2	POS	C4H8N4O4	HMDB0001209	99-16-1	C00499	Alkaloids	Pseudoalkaloids	Purine alkaloids	NUCLJNSWZCHRKL-UHFFFAOYSA-N	0.0148367	0.0135965	0.0143488	0.0142607	0.0113619	0.0109847	0.0101847	0.0108438	1.28508	0.00240841	0.0122432	0.760398	-0.395174
534	Thr-Leu	3.89	level1			231.134	266.9	NEG	C10H20N2O4	HMDB0029065	50299-12-2		Amino acids and Peptides	Small peptides	Dipeptides	BQBCIBCLXBKYHW-CSMHCCOUSA-N	0.0918537	0.0839038	0.0869558	0.0875711	0.143554	0.135944	0.123613	0.13437	1.30468	0.00170583	0.00977055	1.53441	0.617687
535	Pro-Phe	3.89	level1			263.138	258.3	POS	C14H18N2O3	HMDB0011179	13589-02-1		Amino acids and Peptides	Small peptides	Dipeptides	IWIANZLCJVYEFX-RYUDHWBXSA-N	0.0154928	0.0142416	0.0161621	0.0152988	0.0265398	0.0305958	0.0259432	0.0276929	1.3118	0.0013799	0.00852911	1.81013	0.856096
537	Cytosine	3.89	level1			112.05	212.1	POS	C4H5N3O	HMDB0000630	71-30-7	C00380	Alkaloids	Histidine alkaloids	Imidazole alkaloids	OPTASPLRGRRNAP-UHFFFAOYSA-N	0.0404626	0.0392323	0.0414102	0.0403684	0.104593	0.10643	0.0959465	0.102323	1.3376	4.69993e-05	0.00125144	2.53473	1.34183
538	Arachidonoylcarnitine (Car(20:4))	3.89	level1			448.341	201.5	POS	C27H45NO4	HMDB0006455	36816-11-2		Fatty acids	Fatty esters	Fatty acyl carnitines	RBFQHRALHSUPIA-JTPUQHSZSA-N	0.136808	0.108071	0.136552	0.127143	3.89185	3.75853	3.3389	3.6631	1.33952	0.00215107	0.0113668	28.8108	4.84854
540	trans-4-Hydroxycyclohexanecarboxylic acid	3.89	level1			143.071	53.8	NEG	C7H12O3	HMDB0001988	17419-81-7	C04404	Amino acids and Peptides			HCFRWBBJISAZNK-UHFFFAOYSA-N	0.0441456	0.0478578	0.0396957	0.0438997	0.0492247	0.0536417	0.0553321	0.0527328	1.10147	0.0413922	0.0934831	1.20121	0.264491
542	Solasodine	3.89	level1			414.336	36.6	POS	C27H43NO2	HMDB0035282	126-17-0	C10822	Alkaloids	Pseudoalkaloids	Steroidal alkaloids	KWVISVAMQJWJSZ-UHFFFAOYSA-N	2.79407	2.74216	2.85979	2.79867	13.3929	15.4578	12.7697	13.8735	1.33802	0.00527296	0.0207963	4.95715	2.30951
544	Auranofin	3.89	level1			345.064	30.1	NEG	C14H20O9S		34031-32-8					SFOZKJGZNOBSHF-UHFFFAOYSA-N	0.0452586	0.0449373	0.0423134	0.0441698	0.0128776	0.01705	0.0081984	0.0127087	1.27253	0.00031983	0.00342666	0.287723	-1.79725
545	(2S,3R,4S,5S,6R)-2-[4-[(3R,3aR,6R,6aR)-6-[3,5-dimethoxy-4-[(2S,3R,4S,5S,6R)-3,4,5-trihydroxy-6-(hydroxymethyl)tetrahydropyran-2-yl]oxy-phenyl]-1,3,3a,4,6,6a-hexahydrofuro[3,4-c]furan-3-yl]-2,6-dimethoxy-phenoxy]-6-(hydroxymethyl)tetrahydropyran-3,4,5-triol	3.88	level1			741.261	252.4	NEG	C34H46O18		96038-87-8		Shikimates and Phenylpropanoids	Lignans	Furofuranoid lignans	FFDULTAFAQRACT-UERZRVEUSA-N	0.304088	0.33953	0.315982	0.319867	0.200427	0.205993	0.198845	0.201755	1.32688	0.000374233	0.00376723	0.630746	-0.664869
546	Scopolin	3.88	level1			353.088	235.2	NEG	C16H18O9		531-44-2	C01527	Shikimates and Phenylpropanoids	Coumarins	Simple coumarins	SGTCGCCQZOUMJJ-YMILTQATSA-N	0.13038	0.132845	0.111517	0.124914	2.27082	2.04625	2.49753	2.27153	1.33945	0.00358904	0.015971	18.1847	4.18466
548	Isovaleric acid	3.88	level1			101.061	304.1	NEG	C5H10O2	HMDB0000718	503-74-2	C08262	Fatty acids	Fatty Acids and Conjugates	Branched fatty acids	GWYFCOCPABKNJV-UHFFFAOYSA-N	0.108649	0.127765	0.114084	0.116833	0.172363	0.186297	0.18438	0.181013	1.3033	0.000859858	0.00628294	1.54933	0.631646
549	(3aS,5aS,5bR,9S,11aR,13aR)-9-hydroxy-1-isopropenyl-5b,8,8,11a-tetramethyl-1,2,3,4,5,6,7,7a,9,10,11,11b,12,13,13a,13b-hexadecahydrocyclopenta[a]chrysene-3a,5a-dicarboxylic acid	3.88	level1			485.327	463.8	NEG	C30H46O5		245508		Terpenoids	Triterpenoids	Lupane triterpenoids	JWDDEDFQFOCWRN-QXKJUZRNSA-N	0.00284378	0.0017862	0.00277238	0.00246745	0.133224	0.113728	0.22824	0.158397	1.33094	0.0477872	0.104208	64.1947	6.00438
550	(2R,3S,4S,5R,6R)-2-[[(2R,3R,4R)-3,4-dihydroxy-4-(hydroxymethyl)tetrahydrofuran-2-yl]oxymethyl]-6-[(2E)-3,7-dimethylocta-2,6-dienoxy]tetrahydropyran-3,4,5-triol	3.88	level1			429.213	348.3	NEG	C21H36O10		120163-17-9		Terpenoids	Monoterpenoids	Acyclic monoterpenoids	RFFYIBOJHUSIGD-PHDUQKSESA-N	0.217214	0.25227	0.222721	0.230735	2.24181	2.24506	2.063	2.18329	1.34	5.7274e-06	0.000525778	9.46234	3.2422
551	2-Pyrimidinylacetic acid	3.88	level1			137.035	308.7	NEG	C6H6N2O2		66621-73-6		Alkaloids	Nicotinic acid alkaloids	Pyridine alkaloids	NRRCYZPJUABYHL-UHFFFAOYSA-N	0.0229935	0.0256829	0.0185376	0.0224047	0.0393344	0.0463431	0.0429931	0.0428902	1.27614	0.00213153	0.0113024	1.91434	0.936848
553	D-Panose	3.88	level1			503.161	46.1	NEG	C18H32O16				Carbohydrates	Saccharides	Polysaccharides	ZCLAHGAZPPEVDX-MQHGYYCBSA-N	0.0812565	0.0871729	0.0828615	0.0837636	0.0515902	0.066503	0.0611167	0.0597366	1.2216	0.00694575	0.025155	0.713158	-0.487707
557	PC(P-19:0)	3.88	level1			536.37	528.3	POS	C27H54NO7P							MQPMZOIIFNBSDM-AYICAFKVSA-N	0.0342207	0.0362649	0.0371495	0.0358783	0.126124	0.115364	0.0952808	0.112256	1.32624	0.0130993	0.0396131	3.1288	1.64561
558	PC(O-19:2)	3.88	level1			534.354	500.8	POS	C27H52NO7P							DOHLBMBMXWKYLV-BXZGUHLBSA-N	0.0369213	0.0403365	0.0412486	0.0395022	0.0643748	0.0717118	0.0651717	0.0670861	1.32019	0.000496413	0.00446608	1.69829	0.764082
559	4-tert-Octylphenol	3.88	level1			205.159	496.6	NEG	C14H22O	HMDB0013825	140-66-9	C14205				ISAVYTVYFVQUDY-UHFFFAOYSA-N	0.133589	0.130597	0.147095	0.137094	0.0632868	0.0588134	0.0546182	0.0589061	1.33001	0.000158974	0.00233278	0.429677	-1.21867
562	4,5-dihydroxy-6-[(E)-2-(4-hydroxy-1,3-dimethyl-cyclohexyl)vinyl]-3-methoxy-4-phenyl-1,3-dihydroquinolin-2-one	3.88	level1			436.213	395.9	NEG	C26H31NO5				Alkaloids	Tryptophan alkaloids	Quinoline alkaloids	VHCOEFMALBJZLE-ACCUITESSA-N	0.0168016	0.0254785	0.0158118	0.019364	0.00452586	0.00333697	0.00423043	0.00403109	1.30842	0.0362996	0.0846444	0.208174	-2.26414
563	Sanguic acid	3.88	level1			517.317	380.7	NEG	C30H46O7		821797-62-0		Terpenoids	Triterpenoids	Ursane and Taraxastane triterpenoids	FYGSMJAMPMZYFS-CAHUUPCNSA-N	0.00117184	0.00247861	0.00250326	0.00205124	0.0473571	0.0502345	0.0451597	0.0475838	1.32504	7.6666e-06	0.000581229	23.1976	4.5359
564	(E)-2-methylpent-2-enoic acid	3.88	level1			113.061	347	NEG	C6H10O2		16957-70-3		Fatty acids	Fatty Acids and Conjugates	Unsaturated fatty acids	JJYWRQLLQAKNAD-SNAWJCMRSA-N	0.0146726	0.0160637	0.0154561	0.0153974	0.0105187	0.0113846	0.00766575	0.00985633	1.18082	0.00971196	0.0319411	0.640128	-0.643569
565	Tryptophol	3.88	level1			160.077	319.2	NEG	C10H11NO	HMDB0003447	526-55-6	C00955	Alkaloids	Tryptophan alkaloids	Simple indole alkaloids	MBBOMCVGYCRMEA-UHFFFAOYSA-N	0.00584759	0.00728491	0.007015	0.00671583	0.0387875	0.0340058	0.0343618	0.0357184	1.33536	5.44651e-05	0.00134313	5.31853	2.41103
570	Xanthosine	3.88	level1			283.068	135.2	NEG	C10H12N4O6	HMDB0000299	146-80-5	C01762	Carbohydrates	Nucleosides	Purine nucleos(t)ides	UBORTCNDUKBEOP-UUOKFMHZSA-N	0.0906	0.087675	0.0913248	0.0898666	0.11493	0.117421	0.108558	0.113636	1.30848	0.00115233	0.00757384	1.2645	0.338568
571	Tyrosine	3.88	level1			182.081	74.5	POS	C9H11NO3	HMDB0000158	60-18-4	C00082	Amino acids and Peptides	Small peptides	Aminoacids	OUYCCCASQSFEME-QMMMGPOBSA-N	0.135445	0.0965794	0.129586	0.120537	0.421354	0.40703	0.427272	0.418552	1.32223	2.49805e-05	0.000938736	3.4724	1.79593
572	Glutathione disulfide	3.88	level1			611.145	72.4	NEG	C20H32N6O12S2	HMDB0003337	27025-41-8	C00127	Amino acids and Peptides	Small peptides	Tripeptides	YPZRWBKMTBYPTK-BJDJZHNGSA-N	0.0119532	0.0108944	0.00985971	0.0109024	0.034196	0.0392637	0.0373339	0.0369312	1.33328	8.26433e-05	0.00165795	3.38743	1.76019
573	N-Acetyl-beta-alanine	3.88	level1			130.051	64.5	NEG	C5H9NO3	HMDB0061880	3025-95-4	C01073	Amino acids and Peptides	Small peptides	Dipeptides	LJLLAWRMBZNPMO-UHFFFAOYSA-N	0.107715	0.104316	0.0979097	0.103314	0.176915	0.156206	0.154284	0.162468	1.30719	0.0016166	0.00944046	1.57257	0.653127
574	Isocitric acid	3.88	level1			191.019	61.1	NEG	C6H8O7	HMDB0000193	320-77-4	C00311	Fatty acids	Fatty Acids and Conjugates	Dicarboxylic acids	ODBLHEXUDAPZAU-UHFFFAOYSA-N	53.6095	59.3639	50.843	54.6055	88.1059	79.6311	89.8717	85.8696	1.29825	0.00149598	0.00897842	1.57255	0.653102
575	1-Methylpyrrolidine	3.88	level1			86.0961	52.4	POS	C5H11N	HMDB0243946	120-94-5		Alkaloids	Lysine alkaloids	Piperidine alkaloids	AVFZOVWCLRSYKC-UHFFFAOYSA-N	3.02041	2.97591	3.07778	3.0247	4.37054	4.32871	4.00912	4.23612	1.32198	0.000505756	0.00451788	1.40051	0.485951
579	N-Acetylaspartic acid	3.88	level1			174.04	409.2	NEG	C6H9NO5	HMDB0000812	997-55-7	C01042	Amino acids and Peptides	Small peptides	Dipeptides	OTCCIMWXFLJLIA-BYPYZUCNSA-N	0.0402624	0.0366436	0.0387612	0.0385557	0.0488709	0.052741	0.0451369	0.0489163	1.22625	0.0130762	0.0395647	1.26872	0.343371
580	Arg-Phe	3.88	level1			322.187	362.5	POS	C15H23N5O3	HMDB0028716	2047-13-4		Amino acids and Peptides	Small peptides	Dipeptides	PQBHGSGQZSOLIR-RYUDHWBXSA-N	0.0108312	0.0106681	0.0107775	0.0107589	0.0124041	0.0116303	0.0120619	0.0120321	1.26788	0.00511982	0.0203886	1.11834	0.161356
582	Gly-Gly-Leu	3.88	level1			244.13	322.6	NEG	C10H19N3O4		14857-82-0		Amino acids and Peptides	Small peptides	Tripeptides	XPJBQTCXPJNIFE-ZETCQYMHSA-N	0.0155105	0.0146556	0.0167239	0.01563	0.0979208	0.0994536	0.0896236	0.095666	1.33945	1.35737e-05	0.000724229	6.12067	2.61369
583	Valerylcarnitine	3.88	level1			246.169	261.6	POS	C12H23NO4	HMDB0013128	40225-14-7		Fatty acids	Fatty esters	Fatty acyl carnitines	VSNFQQXVMPSASB-SNVBAGLBSA-N	0.0128257	0.0102293	0.0126535	0.0119028	0.028642	0.0296125	0.0277921	0.0286822	1.32231	7.09319e-05	0.00153056	2.4097	1.26885
584	Deoxycytidine	3.88	level1			226.083	224.2	NEG	C9H13N3O4	HMDB0000014	951-77-9	C00881	Carbohydrates	Nucleosides	Pyrimidine nucleos(t)ides	CKTSBUTUHBMZGZ-SHYZEUOFSA-N	0.00394762	0.005099	0.00488326	0.00464329	0.00571192	0.00661742	0.006063	0.00613078	1.13193	0.0279361	0.0693663	1.32035	0.400922
585	5-Methylcytosine	3.88	level1			126.066	204.1	POS	C5H7N3O	HMDB0002894	554-01-8	C02376	Alkaloids	Pseudoalkaloids	pteridine alkaloids	LRSASMSXMSNRBT-UHFFFAOYSA-N	0.0782405	0.0714593	0.0812099	0.0769699	0.184968	0.18123	0.160653	0.175617	1.32832	0.00025983	0.00304734	2.28163	1.19006
587	L-Fucitol	3.88	level1			165.077	197.9	NEG	C6H14O5	HMDB0304954	13074-06-1		Fatty acids	Fatty acyls	Fatty alcohols	SKCKOFZKJLZSFA-KCDKBNATSA-N	0.135833	0.147348	0.146125	0.143102	0.11594	0.128244	0.119551	0.121245	1.21066	0.0133443	0.0401305	0.847264	-0.239116
588	Phe-Trp	3.88	level1			352.165	193.7	POS	C20H21N3O3	HMDB0029006	24587-41-5		Amino acids and Peptides	Small peptides	Dipeptides	JMCOUWKXLXDERB-WMZOPIPTSA-N	0.00615958	0.00557703	0.00588875	0.00587512	0.00392916	0.00453625	0.00451391	0.00432644	1.26226	0.00401191	0.0172326	0.7364	-0.441439
589	(1S,5S,8R,9S)-9-hydroxy-9-(hydroxymethyl)-2,5-dimethyltricyclo[6.3.0.01,5]undec-2-ene-3-carboxylic acid	3.88	level1			265.144	167.2	NEG	C15H22O4				Terpenoids	Sesquiterpenoids		QEXBXSJDNHRVSH-MHEUCROKSA-N	0.0405482	0.00958228	0.0227547	0.0242951	0.0960688	0.0535986	0.108396	0.0860212	1.10674	0.0307423	0.0746167	3.54068	1.82403
590	PC(16:0/20:4)	3.88	level1			782.565	165	POS	C44H80NO8P	HMDB0007982	35418-58-7		Fatty acids	Glycerophospholipids	Glycerophosphocholines	IIZPXYDJLKNOIY-JXPKJXOSSA-N	3.27979	3.1962	3.37611	3.28403	6.24033	6.51133	5.64712	6.13293	1.32779	0.00039664	0.00389168	1.8675	0.901108
592	PC(40:6)	3.88	level1			834.598	159.7	POS	C48H84NO8P							ICAPJNQZVMWDCH-PJLDRQBCSA-N	0.00543482	0.00554245	0.00496616	0.00531448	0.00427579	0.00447184	0.00382571	0.00419111	1.20812	0.0125286	0.0383647	0.788622	-0.342594
595	alpha-Ketoisovaleric acid	3.88	level1			115.04	68.6	NEG	C5H8O3	HMDB0000019	759-05-7	C00141	Fatty acids	Fatty Acids and Conjugates	Branched fatty acids	QHKABHOOEWYVLI-UHFFFAOYSA-N	4.01059	4.54639	4.31916	4.29205	6.34327	6.80118	6.21861	6.45436	1.30985	0.00078175	0.00592222	1.50379	0.588607
596	2-Ketocaproic acid	3.88	level1			129.055	58.2	NEG	C6H10O3	HMDB0001864	2492-75-3	C00902	Fatty acids	Fatty Acids and Conjugates	Oxo fatty acids	XNIHZNNZJHYHLC-UHFFFAOYSA-N	22.281	23.0841	21.5672	22.3108	25.836	28.9181	28.1888	27.6476	1.25954	0.00655412	0.0241805	1.23921	0.309416
598	12(S)-HHTrE	3.88	level1			279.196	53.5	NEG	C17H28O3	HMDB0012535	54397-84-1	C20388	Fatty acids	Fatty Acids and Conjugates	Hydroxy fatty acids	KUKJHGXXZWHSBG-WBGSEQOASA-N	0.484558	0.680284	0.58534	0.583394	0.198864	0.288966	0.366077	0.284636	1.17528	0.0158878	0.0455605	0.487896	-1.03535
599	8-[3-oxo-2-[(E)-pent-2-enyl]cyclopenten-1-yl]octanoic acid	3.88	level1			275.2	39.3	POS	C18H28O3		93633-61-5		Fatty acids	Octadecanoids		RHVWQVSLVMXMBR-XVNBXDOJSA-N	0.0911579	0.109137	0.103831	0.101375	0.0256567	0.0312694	0.0205952	0.0258404	1.3173	0.000254062	0.00300785	0.254898	-1.97201
601	cis-Jasmone	3.88	level1			165.127	33.8	POS	C11H16O	HMDB0035601	488-10-8	C08490	Fatty acids	Octadecanoids	Jasmonic acids	XMLSXPIVAXONDL-PLNGDYQASA-N	0.0163563	0.0172507	0.0140148	0.0158739	0.00797587	0.007363	0.0107531	0.00869733	1.23323	0.00722541	0.0258664	0.547901	-0.868013
606	(5R,10S,13R,14R,17R)-17-[(1R,4S)-4,5-dihydroxy-1,5-dimethyl-hexyl]-4,4,10,13,14-pentamethyl-2,5,6,11,12,15,16,17-octahydro-1H-cyclopenta[a]phenanthrene-3,7-dione	3.87	level1			471.347	51.4	NEG	C30H48O4		217476-73-8		Terpenoids	Triterpenoids	Lanostane, Tirucallane and Euphane triterpenoids	LVGCWXNRZNCAJG-AMKDLFIQSA-N	0.0166351	0.00779718	0.00808514	0.0108391	0.125662	0.158361	0.210188	0.164737	1.31331	0.0233408	0.0604992	15.1983	3.92584
607	Hydroferulic acid	3.87	level1			195.066	151.5	NEG	C10H12O4	HMDB0062121	1135-23-5		Shikimates and Phenylpropanoids			BOLQJTPHPSDZHR-UHFFFAOYSA-N	0.158432	0.149605	0.157216	0.155084	0.636032	0.58754	0.587968	0.603847	1.33996	1.04241e-05	0.000651938	3.89367	1.96113
610	(E)-9,12,13-trihydroxyoctadec-10-enoic acid	3.87	level1			329.233	153	NEG	C18H34O5		29907-56-0|97134-11-7		Fatty acids	Octadecanoids	Other Octadecanoids	MDIUMSLCYIJBQC-BUHFOSPRSA-N	25.9625	29.3661	27.3927	27.5738	16.4519	15.8569	14.8263	15.7117	1.32318	0.000412044	0.00398143	0.569805	-0.811459
611	Manninotriose	3.87	level1			503.161	46.1	NEG	C18H32O16	HMDB0247628	13382-86-0		Carbohydrates	Saccharides	Polysaccharides	FZWBNHMXJMCXLU-UHFFFAOYSA-N	0.0812565	0.0871729	0.0828615	0.0837636	0.0515902	0.066503	0.0611167	0.0597366	1.2216	0.00694575	0.025155	0.713158	-0.487707
612	PC(36:5)	3.87	level1			780.55	604.9	POS	C44H78NO8P	HMDB0007890			Fatty acids	Glycerophospholipids	Glycerophosphocholines	MGUTYWPZCZBAGE-JZDIRDTQSA-N	1.01833	1.03597	1.04661	1.03364	5.37995	5.06861	4.47253	4.97369	1.3382	0.00450295	0.0186443	4.81183	2.26659
614	PC(32:2)	3.87	level1			730.542	600.3	POS	C40H76NO8P							DAHUWMOXEKQXEB-WUGXCKJUSA-N	0.00224721	0.00251317	0.00181985	0.00219341	0.00447541	0.004636	0.0054774	0.00486294	1.29103	0.00196815	0.0107349	2.21707	1.14865
617	α-Cyperone	3.87	level1			219.173	475.6	POS	C15H22O		473-08-5	C17090	Terpenoids	Sesquiterpenoids	Eudesmane sesquiterpenoids	KUFXJZXMWHNCEH-DOMZBBRYSA-N	0.111787	0.10701	0.106001	0.108266	0.359616	0.329595	0.322728	0.337313	1.33861	0.00198146	0.0107755	3.1156	1.63951
621	Sinapyl alcohol	3.87	level1			209.082	269.3	NEG	C11H14O4	HMDB0013070	537-33-7	C02325	Shikimates and Phenylpropanoids	Phenylpropanoids (C6-C3)	Cinnamic acids and derivatives	LZFOPEXOUVTGJS-ONEGZZNKSA-N	0.0421398	0.0334575	0.0370655	0.0375543	0.0491064	0.0575091	0.0638146	0.05681	1.20443	0.0176763	0.0492869	1.51274	0.597168
622	Papaverine	3.87	level1			340.157	259.8	POS	C20H21NO4		61-25-6	C06533|D07425	Alkaloids	Tyrosine alkaloids	Isoquinoline alkaloids	XQYZDYMELSJDRZ-UHFFFAOYSA-N	0.190709	0.171309	0.575247	0.312422	1.61215	1.5701	1.42533	1.53586	1.22579	0.00102983	0.00705705	4.91599	2.29748
624	3-Methyladipic acid	3.87	level1			159.066	253.9	NEG	C7H12O4	HMDB0000555	3058-01-3		Fatty acids	Fatty Acids and Conjugates	Dicarboxylic acids	SYEOWUNSTUDKGM-YFKPBYRVSA-N	0.497853	0.566502	0.539162	0.534506	0.736543	0.703089	0.694972	0.711535	1.28844	0.00170722	0.00977552	1.3312	0.412729
625	Pimelic acid	3.87	level1			159.066	253.9	NEG	C7H12O4	HMDB0000857	111-16-0	C02656	Fatty acids	Fatty Acids and Conjugates	Dicarboxylic acids	WLJVNTCWHIRURA-UHFFFAOYSA-N	0.497853	0.566502	0.539162	0.534506	0.736543	0.703089	0.694972	0.711535	1.28844	0.00170722	0.00977552	1.3312	0.412729
626	4-(3-hydroxyprop-1-enyl)-2,6-dimethoxy-phenol	3.87	level1			209.082	241.1	NEG	C11H14O4		537-33-7		Shikimates and Phenylpropanoids	Phenylpropanoids (C6-C3)	Cinnamic acids and derivatives	LZFOPEXOUVTGJS-UHFFFAOYSA-N	0.020658	0.0234164	0.0214799	0.0218514	0.049988	0.055288	0.0473437	0.0508732	1.329	0.00030238	0.00331636	2.32814	1.21918
627	1-[4-hydroxy-3-[(2S,3R,4S,5S,6R)-3,4,5-trihydroxy-6-(hydroxymethyl)tetrahydropyran-2-yl]oxy-phenyl]ethanone	3.87	level1			313.093	235.1	NEG	C14H18O8		55483-00-6					AOXMCWFZPZRDPE-RKQHYHRCSA-N	0.0945228	0.10483	0.102733	0.100695	0.216557	0.220297	0.212678	0.216511	1.33653	7.18323e-06	0.000566076	2.15016	1.10444
628	(2R,3R,4S,5S,6R)-2-[[(2R,3S,4S,5R,6R)-6-benzyloxy-3,4,5-trihydroxy-tetrahydropyran-2-yl]methoxy]-6-(hydroxymethyl)tetrahydropyran-3,4,5-triol	3.87	level1			431.156	234.5	NEG	C19H28O11		56775-64-5					LLEMMFPELBNINR-SKYGPZSASA-N	3.03299	2.8805	2.99101	2.96817	3.15527	3.16436	3.08197	3.13387	1.12812	0.0341602	0.0808166	1.05583	0.0783713
629	2'-O-Methyluridine	3.87	level1			257.078	130.4	NEG	C10H14N2O6	HMDB0240328	2140-76-3		Carbohydrates	Nucleosides	Pyrimidine nucleos(t)ides	SXUXMRMBWZCMEN-ZOQUXTDFSA-N	0.0486291	0.0535197	0.0570942	0.053081	0.0299078	0.0288217	0.0275898	0.0287731	1.32248	0.000669326	0.00537434	0.54206	-0.883475
631	3-Amino-3-(4-hydroxyphenyl)propanoic acid	3.87	level1			182.081	51.5	POS	C9H11NO3	HMDB0003831	6049-54-3	C04368	Amino acids and Peptides	Small peptides	Aminoacids	JYPHNHPXFNEZBR-UHFFFAOYSA-N	0.125926	0.0925244	0.123184	0.113878	0.329767	0.324561	0.402116	0.352148	1.3118	0.00093913	0.00665504	3.09233	1.62869
632	Epinephrine	3.87	level1			166.086	47.2	POS	C9H13NO3	HMDB0062515	329-65-7	D00095	Alkaloids	Tyrosine alkaloids	Phenylethylamines	UCTWMZQNUQWSLP-UHFFFAOYSA-N	0.611913	0.56087	0.625751	0.599511	1.12757	1.1024	1.09426	1.10807	1.33298	2.12486e-05	0.000872083	1.8483	0.886196
634	S-Methylmethionine	3.87	level1			164.073	45	POS	C6H14NO2S	HMDB0038670	13065-25-3	C05319	Amino acids and Peptides	Small peptides	Aminoacids	YDBYJHTYSHBBAU-UHFFFAOYSA-O	0.0891832	0.0921632	0.0837891	0.0883785	0.113031	0.126822	0.11198	0.117278	1.26847	0.00577398	0.0221332	1.32699	0.408162
636	O-Acetylserine	3.87	level1			146.046	317.3	NEG	C5H9NO4	HMDB0003011	5147-00-2	C00979	Amino acids and Peptides	Small peptides	Aminoacids	VZXPDPZARILFQX-BYPYZUCNSA-N	0.345169	0.331694	0.348873	0.341912	1.12225	1.41145	1.01316	1.18229	1.32468	0.0192516	0.0524846	3.45786	1.78988
637	3-AMINO-2-PIPERIDONE	3.87	level1			115.086	218.8	POS	C5H10N2O	HMDB0000323	1892-22-4		Alkaloids	Lysine alkaloids	Piperidine alkaloids	YCCMTCQQDULIFE-UHFFFAOYSA-N	0.009881	0.00355679	0.00426037	0.00589939	0.0132277	0.0180159	0.0197019	0.0169818	1.15699	0.0164408	0.0467183	2.87857	1.52535
639	Vanillic acid	3.87	level1			167.035	181.7	NEG	C8H8O4	HMDB0000484	121-34-6	C06672	Shikimates and Phenylpropanoids	Phenolic acids (C6-C1)	Cinnamic acids and derivatives	WKOLLVMJNQIZCI-UHFFFAOYSA-N	0.155054	0.15825	0.188564	0.167289	0.260446	0.243077	0.225944	0.243156	1.24706	0.00653502	0.0241312	1.4535	0.539534
640	Betaxolol	3.87	level1			308.221	95.4	POS	C18H29NO3	HMDB0014341	63659-18-7	C06849	Alkaloids			NWIUTZDMDHAVTP-UHFFFAOYSA-N	0.0234663	0.0221895	0.0247601	0.023472	0.0190603	0.0138539	0.0115274	0.0148139	1.13835	0.0210455	0.0560509	0.63113	-0.66399
641	Sphingosine	3.87	level1			300.289	83.5	POS	C18H37NO2	HMDB0000252	123-78-4	C00319	Fatty acids	Sphingolipids	Sphingoid bases	WWUZIQQURGPMPG-KRWOKUGFSA-N	0.0450874	0.0480933	0.0451876	0.0461228	0.0638205	0.069111	0.0754733	0.0694683	1.29877	0.00265294	0.0130491	1.50616	0.590876
643	N-p-Coumaroyloctopamine	3.87	level1			298.108	57.5	NEG	C17H17NO4		66648-45-1		Shikimates and Phenylpropanoids	Phenylpropanoids (C6-C3)	Cinnamic acid amides	VATOSFCFMOPAHX-XCVCLJGOSA-N	6.86663	7.15971	6.24171	6.75602	3.35525	3.25283	5.58717	4.06508	1.11553	0.0291291	0.071614	0.601698	-0.732888
644	8-hydroxy-3-methyl-isochroman-1-one	3.87	level1			177.055	34.2	NEG	C10H10O3		1200-93-7		Shikimates and Phenylpropanoids	Coumarins	Isocoumarins	KWILGNNWGSNMPA-UHFFFAOYSA-N	0.0479279	0.0603256	0.0506139	0.0529558	0.0311881	0.0353964	0.0322841	0.0329562	1.27126	0.00730025	0.0260516	0.622334	-0.684239
645	2,4-dihydroxyheptadec-16-ynyl acetate	3.87	level1			309.242	31.9	POS	C19H34O4		24607-06-5		Fatty acids	Fatty acyls	Fatty alcohols	JAKAZHIACKJNNB-UHFFFAOYSA-N	0.0234173	0.0263099	0.0269123	0.0255465	0.0605231	0.051781	0.0551044	0.0558028	1.32437	0.000397062	0.00389415	2.18436	1.12721
647	Bayogenin	3.86	level1			487.342	448.3	NEG	C30H48O5		6989-24-8		Terpenoids	Triterpenoids	Oleanane triterpenoids	RWNHLTKFBKYDOJ-JEERONPWSA-N	0.0294846	0.0491338	0.0245851	0.0344012	2.02795	1.39271	2.84707	2.08924	1.32804	0.03946	0.0901502	60.7317	5.92438
648	2-[4-[(2S,3R,4S,5S,6R)-3,4,5-trihydroxy-6-(hydroxymethyl)tetrahydropyran-2-yl]oxyphenyl]acetic acid	3.86	level1			313.093	209.6	NEG	C14H18O8				Shikimates and Phenylpropanoids			YHJWCNZGHBFVTB-RGCYKPLRSA-N	0.159306	0.157577	0.162127	0.15967	0.274181	0.274809	0.258541	0.269177	1.33694	3.71084e-05	0.00112163	1.68583	0.75346
649	(E)-2-(3,5-dihydroxy-4,4,10,13-tetramethyl-2,3,6,7,11,12,14,15,16,17-decahydro-1H-cyclopenta[a]phenanthren-17-yl)-6-hydroxy-5,6-dimethyl-hept-4-en-3-one	3.86	level1			471.347	51.4	NEG	C30H48O4				Terpenoids	Triterpenoids	Lanostane, Tirucallane and Euphane triterpenoids	BUHGQCWMNSHDMH-ISLYRVAYSA-N	0.0166351	0.00779718	0.00808514	0.0108391	0.125662	0.158361	0.210188	0.164737	1.31331	0.0233408	0.0604992	15.1983	3.92584
650	(10Z)-3a,10-dimethyl-1-prop-1-en-2-yl-2,3,4,5,6,7,8,9,12,12a-decahydro-1H-cyclopenta[11]annulene-6-carboxylic acid	3.86	level1			303.233	545.9	NEG	C20H32O2				Terpenoids	Diterpenoids	Dolabellane diterpenoids	FVDVQQJLECWRKH-NVNXTCNLSA-N	1.69171	2.02185	1.94915	1.88757	2.53506	2.49323	2.44727	2.49185	1.24803	0.00426175	0.0179453	1.32014	0.40069
651	3-Epiursolic Acid	3.86	level1			455.353	542.8	NEG	C30H48O3				Terpenoids	Triterpenoids	Ursane and Taraxastane triterpenoids	WCGUUGGRBIKTOS-XHINXETDSA-N	0.0350789	0.0291573	0.0343247	0.0328536	0.223197	0.229507	0.248429	0.233711	1.33839	1.35512e-05	0.000723346	7.1137	2.8306
653	6,7,4'-Trihydroxyisoflavone	3.86	level1			269.045	319.8	NEG	C15H10O5		17817-31-1	C14314	Shikimates and Phenylpropanoids	Isoflavonoids	Isoflavones	GYLUFQJZYAJQDI-UHFFFAOYSA-N	0.243286	0.207949	0.244742	0.231992	0.00706729	0.0106135	0.0102776	0.00931946	1.33631	0.00270624	0.013222	0.0401714	-4.63769
654	(E)-8-hydroxy-2,6-dimethyl-oct-2-enoic acid	3.86	level1			185.118	346.3	NEG	C10H18O3				Fatty acids	Fatty Acids and Conjugates	Branched fatty acids	CDAJACJYYZHNJA-WEVVVXLNSA-N	0.180775	0.227909	0.209705	0.20613	0.065182	0.0597722	0.0552183	0.0600575	1.32949	0.000479648	0.00437339	0.291357	-1.77914
655	(1S,3R,4R,5R)-1,3,4-trihydroxy-5-[(E)-3-(4-hydroxy-3-methoxy-phenyl)prop-2-enoyl]oxy-cyclohexanecarboxylic acid	3.86	level1			367.103	258.5	NEG	C17H20O9		62929-69-5		Shikimates and Phenylpropanoids	Phenylpropanoids (C6-C3)	Cinnamic acids and derivatives	RAGZUCNPTLULOL-KJJWLSQTSA-N	0.084254	0.0884292	0.0909637	0.0878823	0.223277	0.207216	0.207358	0.212617	1.33759	2.54072e-05	0.000944794	2.41934	1.27461
656	N-Acetylalanine	3.86	level1			130.051	64.5	NEG	C5H9NO3	HMDB0255053	139146-66-0		Amino acids and Peptides	Small peptides	Dipeptides	KTHDTJVBEPMMGL-UHFFFAOYSA-N	0.107715	0.104316	0.0979097	0.103314	0.176915	0.156206	0.154284	0.162468	1.30719	0.0016166	0.00944046	1.57257	0.653127
657	Isovalerylcarnitine (Car(5:0))	3.86	level1			246.169	261.6	POS	C12H23NO4	HMDB0000688	31023-24-2	C20826	Fatty acids	Fatty esters	Fatty acyl carnitines	IGQBPDJNUXPEMT-SNVBAGLBSA-N	0.0128257	0.0102293	0.0126535	0.0119028	0.028642	0.0296125	0.0277921	0.0286822	1.32231	7.09319e-05	0.00153056	2.4097	1.26885
662	3,12-dihydroxy-4,6a,6b,11,12,14b-hexamethyl-1,2,3,4a,5,6,7,8,9,10,11,12a,14,14a-tetradecahydropicene-4,8a-dicarboxylic acid	3.86	level1			501.322	444.1	NEG	C30H46O6				Terpenoids	Triterpenoids	Ursane and Taraxastane triterpenoids	UIEGOKVPCRANSU-UHFFFAOYSA-N	0.00156039	0.000560471	0.00269846	0.00160644	0.0688085	0.0456688	0.0751574	0.0632116	1.30017	0.0200993	0.0541848	39.3488	5.29825
663	Sebacic acid	3.86	level1			201.113	353.6	NEG	C10H18O4	HMDB0000792	111-20-6	C08277	Fatty acids	Fatty Acids and Conjugates	Dicarboxylic acids	CXMXRPHRNRROMY-UHFFFAOYSA-N	0.317744	0.379313	0.330026	0.342361	0.270316	0.254344	0.25962	0.261427	1.23469	0.0139883	0.0415265	0.7636	-0.389111
665	3H-1,3-benzothiazol-2-one	3.86	level1			150.002	336.3	NEG	C7H5NOS		934-34-9		Alkaloids	Anthranilic acid alkaloids	Acridone alkaloids	YEDUAINPPJYDJZ-UHFFFAOYSA-N	0.210005	0.266651	0.250852	0.242503	0.167302	0.162826	0.150472	0.1602	1.25322	0.00949484	0.0314321	0.660611	-0.598127
668	(2R,3S,4S,5R,6R)-2-[[(2S,3R,4R)-3,4-dihydroxy-4-(hydroxymethyl)tetrahydrofuran-2-yl]oxymethyl]-6-(2-phenylethoxy)tetrahydropyran-3,4,5-triol	3.86	level1			415.161	268.3	NEG	C19H28O10				Shikimates and Phenylpropanoids	Phenylethanoids (C6-C2)	Phenylethanoids	GZSQKOFXMZDKPV-DERWZFJFSA-N	0.425142	0.396425	0.392891	0.40482	0.0987993	0.101829	0.187461	0.129363	1.26463	0.000864982	0.00630493	0.319557	-1.64586
669	4-[4-hydroxy-2,2,6-trimethyl-6-[(2S,3R,4S,5S,6R)-3,4,5-trihydroxy-6-(hydroxymethyl)tetrahydropyran-2-yl]oxy-cyclohexylidene]but-3-en-2-one	3.86	level1			385.187	256.1	NEG	C19H30O8				Terpenoids	Apocarotenoids	Megastigmanes	XTODSGVDHGMKSN-QOEUTKMXSA-N	0.0857875	0.105713	0.0951899	0.0955635	0.0437817	0.0447149	0.0422206	0.0435724	1.32453	0.0110684	0.0350439	0.455953	-1.13304
670	(E)-N-[2-(4-Hydroxy-3-methoxyphenyl)ethyl]-3-[4-methoxy-3-[(2S,3R,4R,5S,6R)-3,4,5-trihydroxy-6-(hydroxymethyl)oxan-2-yl]oxyphenyl]prop-2-enamide	3.86	level1			506.201	252.5	POS	C25H31NO10		1408298-11-2		Shikimates and Phenylpropanoids	Phenylpropanoids (C6-C3)	Cinnamic acid amides	FYYYSHMTVVJBKO-PMTAATDPSA-N	0.0227816	0.018647	0.0224286	0.0212857	0.0126192	0.0099258	0.0107431	0.011096	1.28799	0.00273744	0.0133277	0.521289	-0.939845
672	2,3-Dihydroxy-4-methoxyacetophenone	3.86	level1			183.065	234.6	POS	C9H10O4		708-53-2		Shikimates and Phenylpropanoids			VCONERRCKOKCHE-UHFFFAOYSA-N	0.0260835	0.025804	0.0269609	0.0262828	0.0871441	0.121821	0.0755627	0.0948427	1.30913	0.0386436	0.0887373	3.60855	1.85142
674	(2S,3R,4S,5S,6R)-2-[4-(2-nitroethyl)phenoxy]-6-[[(2S,3R,4S,5R)-3,4,5-trihydroxytetrahydropyran-2-yl]oxymethyl]tetrahydropyran-3,4,5-triol	3.86	level1			442.136	224.5	NEG	C19H27NO12		649758-25-8		Shikimates and Phenylpropanoids	Phenylethanoids (C6-C2)	Phenylethanoids	ZHVLPKFAODFQST-BMVMOQKNSA-N	0.0281205	0.0314242	0.0313566	0.0303004	0.0424417	0.0420525	0.0430485	0.0425142	1.31027	0.000412765	0.00398426	1.40309	0.488608
675	2-Hydroxyhexanedioic acid	3.86	level1			143.035	96.4	NEG	C6H10O5	HMDB0000321	18294-85-4	C02360	Fatty acids	Fatty Acids and Conjugates	Dicarboxylic acids	OTTXIFWBPRRYOG-UHFFFAOYSA-N	0.0911062	0.0963731	0.0882032	0.0918941	0.115353	0.122504	0.107673	0.115177	1.24483	0.00899051	0.0302197	1.25336	0.325804
676	(2R)-6-Oxo-2-piperidinecarboxylic acid	3.86	level1			142.051	72.8	NEG	C6H9NO3	HMDB0061705	72002-30-3		Amino acids and Peptides	Small peptides	Aminoacids	FZXCPFJMYOQZCA-SCSAIBSYSA-N	0.860142	0.885957	1.36089	1.03566	2.01926	1.89211	1.90744	1.9396	1.21807	0.00572231	0.0220007	1.87282	0.90521
677	3-Ureidopropionic acid	3.86	level1			131.046	54	NEG	C4H8N2O3	HMDB0000026	462-88-4	C02642	Amino acids and Peptides	Small peptides	Aminoacids	JSJWCHRYRHKBBW-UHFFFAOYSA-N	0.23181	0.229629	0.24822	0.236553	0.366387	0.380886	0.34463	0.363968	1.32109	0.000454045	0.00422306	1.53863	0.621647
679	LPC(16:1)	3.86	level1			494.322	494.6	POS	C24H48NO7P							JBFBGNHYRPBNML-WHIOSMTNSA-N	0.00769662	0.00585224	0.00629507	0.00661464	0.0099316	0.00943822	0.00873799	0.00936927	1.19545	0.0136295	0.0407643	1.41644	0.502274
680	D-(+)-Melezitose	3.86	level1			503.161	466	NEG	C18H32O16	HMDB0011730	597-12-6	C08243	Carbohydrates	Saccharides	Polysaccharides	QWIZNVHXZXRPDR-WSCXOGSTSA-N	0.0812592	0.0848607	0.0868522	0.0843241	0.110697	0.0988382	0.0933361	0.100957	1.14739	0.0364675	0.0849321	1.19725	0.259727
681	Citramalic acid	3.86	level1			147.03	409.7	NEG	C5H8O5	HMDB0000426	597-44-4	C00815	Fatty acids	Fatty Acids and Conjugates	Hydroxy fatty acids	XFTRTWQBIOMVPK-UHFFFAOYSA-N	0.286933	0.27867	0.289579	0.285061	0.449735	0.398248	0.489114	0.445699	1.29333	0.0243155	0.0623953	1.56352	0.644802
684	Acetylcarnitine (Car(2:0))	3.86	level1			204.123	324.2	POS	C9H17NO4	HMDB0000201	3040-38-8	C02571	Fatty acids	Fatty esters	Fatty acyl carnitines	RDHQFKQIGNGIED-MRVPVSSYSA-N	0.174486	0.183056	0.180836	0.17946	0.382876	0.437913	0.388014	0.402934	1.33345	0.00531585	0.0209116	2.24527	1.16689
686	Propionylcarnitine (Car(3:0))	3.86	level1			218.138	299.4	POS	C10H19NO4	HMDB0000824	17298-37-2	C03017	Fatty acids	Fatty esters	Fatty acyl carnitines	UFAHZIUFPNSHSL-UHFFFAOYSA-N	0.00990388	0.00929632	0.00999216	0.00973079	0.0141829	0.0167992	0.0151202	0.0153674	1.30518	0.00209869	0.0111958	1.57926	0.659248
687	Tyrosylalanine	3.86	level1			251.103	266.3	NEG	C12H16N2O4	HMDB0029098	730-08-5		Amino acids and Peptides	Small peptides	Dipeptides	NLKUJNGEGZDXGO-UHFFFAOYSA-N	0.0277139	0.0254787	0.0281851	0.0271259	0.0351533	0.0356458	0.0313318	0.0340436	1.22143	0.0123755	0.0380119	1.25502	0.327713
688	coumaroyl(3-OMe)(-3)Glc(a1-2b)L-Fruf	3.86	level1			517.155	257	NEG	C22H30O14				Shikimates and Phenylpropanoids			AVZDWQPNGQYBPS-OVONMYPQSA-N	0.0103772	0.00658295	0.00945497	0.00880503	0.0309353	0.0249347	0.0274758	0.0277819	1.29747	0.000801767	0.0060067	3.15524	1.65775
689	Ethambutol (dihydrochloride)	3.86	level1			187.18	249.5	POS	C10H24N2O2	HMDB0014474	74-55-5	C06984	Alkaloids	Peptide alkaloids	Simple amide alkaloids	AEUTYOVWOVBAKS-UWVGGRQHSA-N	0.0560767	0.0503552	0.0536207	0.0533509	0.33546	0.32211	0.29104	0.316203	1.33915	0.0021881	0.0114992	5.92687	2.56727
691	2-Linoleoyl-1-palmitoyl-sn-glycero-3-phosphoethanolamine	3.86	level1			714.506	169.2	NEG	C39H74NO8P	HMDB0008928	26662-95-3		Fatty acids	Glycerophospholipids	Glycerophosphoethanolamines	HBZNVZIRJWODIB-NHCUFCNUSA-N	2.23872	2.474	2.41362	2.37545	3.599	3.65343	3.7299	3.66077	1.32734	8.82797e-05	0.00171313	1.54109	0.62395
692	2'-O-Methyladenosine	3.86	level1			282.119	98.7	POS	C11H15N5O4	HMDB0004326	2140-79-6		Carbohydrates	Nucleosides	Purine nucleos(t)ides	FPUGCISOLXNPPC-INWNYVOZSA-N	0.226694	0.238798	0.241035	0.235509	0.347895	0.319734	0.316727	0.328119	1.31156	0.00104492	0.00712348	1.39323	0.478434
695	[3-[ethoxy(hydroxy)phosphoryl]oxy-2-hydroxy-propyl] (9Z,12Z)-octadeca-9,12-dienoate	3.86	level1			461.267	61.1	NEG	C23H43O7P				Fatty acids	Glycerophospholipids	Glycerophosphoethanolamines	RRBISTZDGPMZFF-MURFETPASA-N	0.0500796	0.0604069	0.0497679	0.0534181	0.202382	0.208896	0.18043	0.197236	1.33231	0.000101768	0.0018473	3.69231	1.88452
697	2-amino-5-[(1-carboxy-2-phenyl-ethyl)amino]-5-oxo-pentanoic acid	3.86	level1			295.128	365.8	POS	C14H18N2O5	HMDB0000594	7432-24-8		Amino acids and Peptides	Small peptides	Dipeptides	XHHOHZPNYFQJKL-UHFFFAOYSA-N	0.00815183	0.00702027	0.00987039	0.00834749	0.0217165	0.0217703	0.019383	0.0209566	1.30785	0.000383476	0.0038163	2.51053	1.32799
698	1,10-dihydroxy-9-(hydroxymethyl)-1,2,6a,6b,9,12a-hexamethyl-2,3,4,5,6,6a,7,8,8a,10,11,12,13,14b-tetradecahydropicene-4a-carboxylic acid	3.85	level1			487.342	448.3	NEG	C30H48O5				Terpenoids	Triterpenoids	Ursane and Taraxastane triterpenoids	YLHQFGOOMKJFLP-UHFFFAOYSA-N	0.0294846	0.0491338	0.0245851	0.0344012	2.02795	1.39271	2.84707	2.08924	1.32804	0.03946	0.0901502	60.7317	5.92438
700	Caffeic acid	3.85	level1			179.035	263.4	NEG	C9H8O4	HMDB0003501	501-16-6	C01197	Shikimates and Phenylpropanoids	Phenylpropanoids (C6-C3)	Cinnamic acids and derivatives	QAIPRVGONGVQAS-DUXPYHPUSA-N	0.174486	0.155348	0.225252	0.185029	0.67666	0.634511	0.757209	0.68946	1.31933	0.000265382	0.0030839	3.72623	1.89772
702	Citric acid	3.85	level1			191.019	61.1	NEG	C6H8O7	HMDB0000094	77-92-9	C00158	Fatty acids	Fatty Acids and Conjugates	Hydroxy fatty acids	KRKNYBCHXYNGOX-UHFFFAOYSA-N	53.6095	59.3639	50.843	54.6055	88.1059	79.6311	89.8717	85.8696	1.29825	0.00149598	0.00897842	1.57255	0.653102
703	2-Oxo-4-phenylbutyric acid	3.85	level1			177.055	34.2	NEG	C10H10O3		710-11-2	C20327	Shikimates and Phenylpropanoids			PPKAIMDMNWBOKN-UHFFFAOYSA-N	0.0479279	0.0603256	0.0506139	0.0529558	0.0311881	0.0353964	0.0322841	0.0329562	1.27126	0.00730025	0.0260516	0.622334	-0.684239
706	4-Hydroxycinnamic acid	3.85	level1			163.04	294.1	NEG	C9H8O3	HMDB0002035	7400-08-0	C00811	Shikimates and Phenylpropanoids	Phenylpropanoids (C6-C3)	Cinnamic acids and derivatives	NGSWKAQJJWESNS-ZZXKWVIFSA-N	0.0745474	0.0670613	0.0760695	0.0725594	0.027716	0.0300165	0.0483728	0.0353684	1.21142	0.00636164	0.0236798	0.487441	-1.0367
707	Tropolone	3.85	level1			121.029	320.8	NEG	C7H6O2				Shikimates and Phenylpropanoids			MDYOLVRUBBJPFM-UHFFFAOYSA-N	0.930546	1.06659	1.02865	1.0086	1.94194	1.88161	1.83112	1.88489	1.32835	7.0834e-05	0.00152974	1.86883	0.902134
708	PC(37:6)	3.85	level1			792.559	591.6	POS	C45H78NO8P							OGPJJLLSVRJWDH-MQULWMCLSA-N	0.017449	0.0171301	0.0185926	0.0177239	0.02747	0.0341387	0.0372613	0.0329567	1.28279	0.0316046	0.0761685	1.85945	0.894874
710	PC(20:1)	3.85	level1			546.354	499.1	POS	C28H54NO8P		61596-54-1					FXUOEWGMRIDVHF-ZPIZUECNSA-N	0.00447635	0.00565787	0.00518312	0.00510578	0.0154555	0.014239	0.0139759	0.0145568	1.32803	7.77828e-05	0.00160959	2.85104	1.51149
714	10-Hydroxydecanoic acid	3.85	level1			187.134	359.1	NEG	C10H20O3	HMDB0244272	1679-53-4	C02774	Fatty acids	Fatty Acids and Conjugates	Hydroxy fatty acids	YJCJVMMDTBEITC-UHFFFAOYSA-N	0.0546813	0.0450326	0.0384905	0.0460681	0.0230038	0.022181	0.0157345	0.0203064	1.25218	0.00791824	0.0275878	0.440791	-1.18183
716	Indoleacetic acid	3.85	level1			174.056	319.2	NEG	C10H9NO2	HMDB0000197	87-51-4	C00954	Alkaloids	Tryptophan alkaloids	Simple indole alkaloids	SEOVTRFCIGRIMH-UHFFFAOYSA-N	0.0296111	0.0465479	0.0326223	0.0362604	0.0151826	0.0148852	0.0183961	0.0161546	1.25138	0.019644	0.0532922	0.445517	-1.16645
718	7-(3-furyl)-10,13-dihydroxy-1,8,12,17,17-pentamethyl-3,6,16-trioxapentacyclo[9.9.0.02,4.02,8.012,18]icosane-5,15,20-trione	3.85	level1			487.2	313.3	NEG	C26H32O9				Terpenoids	Triterpenoids	Limonoids	ITMCBHIQGZAEPX-UHFFFAOYSA-N	0.274821	0.328198	0.2818	0.29494	0.0786521	0.0845142	0.0867619	0.0833094	1.33481	0.00542121	0.0211978	0.282463	-1.82387
720	6-hydroxy-4-methyl-chromen-2-one	3.85	level1			177.054	288.1	POS	C10H8O3		2373-31-1		Shikimates and Phenylpropanoids	Coumarins	Simple coumarins	IRUHWRSITUYICV-UHFFFAOYSA-N	0.146645	0.113131	0.134994	0.13159	0.346235	0.360362	0.395923	0.367507	1.32305	0.000185148	0.00254471	2.79281	1.48172
722	(2R,3S,4S,5R,6S)-2-(hydroxymethyl)-6-[4-[[(3S,4S,5R)-4-(hydroxymethyl)-5-[3-methoxy-4-[(2S,3R,4S,5S,6R)-3,4,5-trihydroxy-6-(hydroxymethyl)tetrahydropyran-2-yl]oxy-phenyl]tetrahydrofuran-3-yl]methyl]-2-methoxy-phenoxy]tetrahydropyran-3,4,5-triol	3.85	level1			683.255	241.1	NEG	C32H44O16				Shikimates and Phenylpropanoids	Lignans	Furanoid lignans	PBLWZMSRSJTRHJ-CTZSIISJSA-N	0.151936	0.13988	0.156005	0.149274	0.100781	0.104722	0.105808	0.10377	1.31584	0.000857107	0.00626952	0.695168	-0.524565
723	(2E,4E)-5-[8-hydroxy-1,5-dimethyl-3-[3,4,5-trihydroxy-6-(hydroxymethyl)tetrahydropyran-2-yl]oxy-6-oxabicyclo[3.2.1]octan-8-yl]-3-methyl-penta-2,4-dienoic acid	3.85	level1			443.192	230.5	NEG	C21H32O10				Terpenoids	Apocarotenoids	Apocarotenoids(ε-)	UHHVHDDICOEBTQ-LJIKRCSCSA-N	1.21418	1.44629	1.41502	1.3585	2.73346	2.72855	2.61406	2.69202	1.32346	8.57889e-05	0.00168986	1.98162	0.98668
725	N-Feruloylputrescine	3.85	level1			265.154	211.1	POS	C14H20N2O3		501-13-3|91000-11-2	C10497	Alkaloids	Ornithine alkaloids	Polyamines	SFUVCMKSYKHYLD-FNORWQNLSA-N	0.0896487	0.0795946	0.0856858	0.0849763	0.22679	0.17808	0.248499	0.21779	1.30816	0.0219439	0.0578261	2.56294	1.3578
726	Phloroglucinol	3.85	level1			127.039	95.2	POS	C6H6O3	HMDB0013675	108-73-6	C02183	Polyketides	Phloroglucinols	Oligomeric phloroglucinols (phlorotannins)	QCDYQQDYXPDABM-UHFFFAOYSA-N	0.0610646	0.0632341	0.0603315	0.0615434	0.0719821	0.0845878	0.0740943	0.0768881	1.21565	0.01843	0.0508282	1.24933	0.321156
728	N2-Acetyllysine	3.85	level1			189.123	407.8	POS	C8H16N2O3	HMDB0000446	1946-82-3	C12989	Amino acids and Peptides	Small peptides	Dipeptides	VEYYWZRYIYDQJM-ZETCQYMHSA-N	0.0422078	0.038885	0.0408212	0.040638	0.0462152	0.0494859	0.0493835	0.0483616	1.25592	0.00587015	0.0223972	1.19006	0.251032
729	N-Acetyl-arginine	3.85	level1			217.129	388.4	POS	C8H16N4O3	HMDB0004620	155-84-0		Amino acids and Peptides	Small peptides	Dipeptides	SNEIUMQYRCDYCH-LURJTMIESA-N	0.066283	0.0653758	0.0656736	0.0657775	0.0565994	0.05738	0.0592185	0.0577327	1.31173	0.000607902	0.00506279	0.877697	-0.188206
730	Normetanephrine	3.85	level1			166.086	242.6	POS	C9H13NO3	HMDB0000819	97-31-4	C05589	Alkaloids	Tyrosine alkaloids	Phenylethylamines	YNYAYWLBAHXHLL-UHFFFAOYSA-N	0.230851	0.185825	0.222384	0.21302	0.644075	0.52693	0.520718	0.563908	1.31576	0.00116736	0.00763739	2.64721	1.40447
731	Tryptamine	3.85	level1			161.107	216.1	POS	C10H12N2	HMDB0000303	61-54-1	C00398	Alkaloids	Tryptophan alkaloids	Simple indole alkaloids	APJYDQYYACXCRM-UHFFFAOYSA-N	0.017744	0.0151232	0.0106564	0.0145078	0.00383348	0.0036255	0.00316374	0.00354091	1.30684	0.0327947	0.0783334	0.244069	-2.03464
732	Nicotine	3.85	level1			163.123	67.8	POS	C10H14N2	HMDB0001934	54-11-5	C00745	Alkaloids	Nicotinic acid alkaloids	Pyridine alkaloids	SNICXCGAKADSCV-JTQLQIEISA-N	0.0670923	0.0705188	0.0686095	0.0687402	0.0584436	0.0513319	0.0469668	0.0522475	1.21533	0.00911795	0.0305295	0.760071	-0.395793
733	Formylanthranilic acid	3.85	level1			164.035	62	NEG	C8H7NO3	HMDB0004089	3342-77-6	C05653	Alkaloids	Anthranilic acid alkaloids	Anthranillic acid derivatives	LLLPDUXGHXIXIW-UHFFFAOYSA-N	0.0538698	0.0601117	0.0552	0.0563938	0.0421047	0.0435213	0.0454832	0.043703	1.2793	0.00402466	0.0172677	0.774961	-0.367804
734	1,3-Dimethylpyrazole	3.85	level1			97.0758	25.6	POS	C5H8N2		694-48-4		Alkaloids			NODLZCJDRXTSJO-UHFFFAOYSA-N	0.00411009	0.00401418	0.00359326	0.00390584	0.00479336	0.00498687	0.00466359	0.00481461	1.23079	0.00788802	0.0275135	1.23267	0.301784
735	Pristanic acid	3.84	level1			297.279	597.3	NEG	C19H38O2	HMDB0000795	1189-37-3		Fatty acids	Fatty Acids and Conjugates	Branched fatty acids	PAHGJZDQXIOYTH-UHFFFAOYSA-N	0.170478	0.190093	0.186938	0.182503	0.308673	0.288198	0.341814	0.312895	1.30905	0.00147285	0.00889027	1.71446	0.777758
736	17-ODYA	3.84	level1			279.232	551.5	NEG	C18H32O2	HMDB0244776	34450-18-5					DZIILFGADWDKMF-UHFFFAOYSA-N	52.9432	55.2147	53.6059	53.9213	66.4627	66.1748	68.2674	66.9683	1.32745	0.000156234	0.00231082	1.24196	0.312623
737	methyl 2-hydroxy-3-[(2S,3R,4S,5S,6R)-3,4,5-trihydroxy-6-(hydroxymethyl)tetrahydropyran-2-yl]oxy-benzoate	3.84	level1			329.088	233.8	NEG	C14H18O9				Shikimates and Phenylpropanoids	Phenolic acids (C6-C1)	Simple phenolic acids	VSTYNZNDJYVPKL-RRZLQCMWSA-N	0.0531495	0.0584432	0.0619579	0.0578502	0.0794157	0.0806797	0.0689549	0.0763501	1.20775	0.0148523	0.043368	1.31979	0.400307
738	3-[3-hydroxy-2-[(2S,3R,4S,5S,6R)-3,4,5-trihydroxy-6-(hydroxymethyl)tetrahydropyran-2-yl]oxy-phenyl]propanoic acid	3.84	level1			343.103	240.2	NEG	C15H20O9				Shikimates and Phenylpropanoids			APQFDHZCDLNMLA-APACUCGBSA-N	0.505088	0.882577	0.506664	0.631443	1.37169	1.35746	1.3351	1.35475	1.21698	0.028104	0.0696879	2.14548	1.1013
739	3-Epioleanolic acid	3.84	level1			455.353	542.8	NEG	C30H48O3	HMDB0036962	25499-90-5		Terpenoids	Triterpenoids	Oleanane triterpenoids	MIJYXULNPSFWEK-KDQGZELNSA-N	0.0350789	0.0291573	0.0343247	0.0328536	0.223197	0.229507	0.248429	0.233711	1.33839	1.35512e-05	0.000723346	7.1137	2.8306
740	(1R,2S,6S,9S,10S,11R,14S,15S,18S,20R,23R,24S)-10,20-dihydroxy-6,10,23-trimethyl-4-azahexacyclo[12.11.0.02,11.04,9.015,24.018,23]pentacosan-17-one	3.84	level1			412.32	182.9	POS	C27H43NO3		157478-01-8		Alkaloids	Pseudoalkaloids	Steroidal alkaloids	IQDIERHFZVCNRZ-MWNPEGAOSA-N	0.0175191	0.0178796	0.0172553	0.0175513	0.100546	0.117963	0.0921254	0.103545	1.33711	0.00770943	0.0270649	5.89953	2.5606
741	2-hydroxy-3-methoxy-benzaldehyde	3.84	level1			151.04	275.7	NEG	C8H8O3		148-53-8		Shikimates and Phenylpropanoids	Phenylpropanoids (C6-C3)	Cinnamic acids and derivatives	JJVNINGBHGBWJH-UHFFFAOYSA-N	0.371319	0.376835	0.377432	0.375196	0.557198	0.54126	0.537045	0.545168	1.33851	1.22346e-05	0.000691953	1.45302	0.539057
744	7,8-dimethoxychromen-2-one	3.84	level1			207.064	284	POS	C11H10O4		2445-80-9		Shikimates and Phenylpropanoids	Coumarins	Simple coumarins	CHBBSMUTOCUVDW-UHFFFAOYSA-N	0.0980199	0.0868784	0.0831209	0.0893397	0.00959276	0.0175446	0.0134342	0.0135239	1.31767	0.000112766	0.0019468	0.151376	-2.7238
746	2-(2-phenylethoxy)-6-[(3,4,5-trihydroxytetrahydropyran-2-yl)oxymethyl]tetrahydropyran-3,4,5-triol	3.84	level1			415.161	268.3	NEG	C19H28O10		129932-48-5		Shikimates and Phenylpropanoids	Phenylethanoids (C6-C2)	Phenylethanoids	ZRGXCWYRIBRSQA-UHFFFAOYSA-N	0.425142	0.396425	0.392891	0.40482	0.0987993	0.101829	0.187461	0.129363	1.26463	0.000864982	0.00630493	0.319557	-1.64586
747	(Z)-5,8,11-trihydroxyoctadec-9-enoic acid	3.84	level1			329.233	392	NEG	C18H34O5				Fatty acids	Octadecanoids	Other Octadecanoids	FITAKYVPWCVTII-QBFSEMIESA-N	28.9769	32.2528	29.8668	30.3655	22.4483	20.9609	20.3279	21.2457	1.30372	0.00142602	0.00870864	0.699667	-0.51526
749	PC(31:1)	3.84	level1			700.533	608.3	POS	C39H76NO8P							NLIPNXKQJMHIRD-ROOGKDHUSA-N	0.0268314	0.0277539	0.0288346	0.0278066	0.0338959	0.0321433	0.0366363	0.0342252	1.23667	0.0109151	0.0346906	1.23083	0.299628
750	PC(38:7)	3.84	level1			804.55	598.2	POS	C46H78NO8P							KVZGNJNSFSUTHN-WJPDOSEWSA-N	0.0189764	0.0195111	0.0176577	0.0187151	0.0420466	0.0395939	0.0359308	0.0391904	1.32709	0.000387353	0.00383941	2.09406	1.0663
753	LPE(20:1)	3.84	level1			508.338	547.7	POS	C25H50NO7P	HMDB0011512			Fatty acids	Glycerophospholipids	Glycerophosphoethanolamines	JEAGLCKGAKACCE-HBRDYDSTSA-N	0.0109995	0.00948732	0.0106537	0.0103802	0.0188524	0.0240756	0.0191902	0.0207061	1.29739	0.00411462	0.0175349	1.99478	0.996226
754	LPI(18:2)	3.84	level1			597.301	510.7	POS	C27H49O12P							JRYAXPBHUDQASY-BPUZAZEDSA-N	0.205357	0.163649	0.207761	0.192256	0.252085	0.292138	0.251809	0.265344	1.16804	0.020348	0.0546817	1.38016	0.464839
755	Platycodigenin	3.84	level1			519.332	416.4	NEG	C30H48O7		22327-82-8		Terpenoids	Triterpenoids	Oleanane triterpenoids	APTNOIWSCDBIAS-UHFFFAOYSA-N	0.00358945	0.0040043	0.00375877	0.00378417	0.0215892	0.018676	0.0218846	0.0207166	1.33809	0.00327443	0.0150069	5.47454	2.45274
757	methyl (E)-3-(3-hydroxy-4-methoxy-phenyl)prop-2-enoate	3.84	level1			207.066	342.9	NEG	C11H12O4		16980-82-8		Shikimates and Phenylpropanoids	Phenylpropanoids (C6-C3)	Cinnamic acids and derivatives	JTLOUXXZZFFBBW-GQCTYLIASA-N	0.0274262	0.0272693	0.0263266	0.0270074	0.0490773	0.0495235	0.0404922	0.0463643	1.30181	0.0210843	0.0561279	1.71673	0.779662
761	4-Hydroxyphenylglycolic acid	3.84	level1			167.035	105.1	NEG	C8H8O4	HMDB0000822	1198-84-1	C11527	Shikimates and Phenylpropanoids	Phenylpropanoids (C6-C3)	Cinnamic acids and derivatives	YHXHKYRQLYQUIH-UHFFFAOYSA-N	0.0406125	0.0386037	0.0393928	0.0395363	0.0444499	0.0484122	0.044273	0.0457117	1.22305	0.0137536	0.0410204	1.15619	0.209384
763	Choline	3.84	level1			104.106	43.7	POS	C5H14NO	HMDB0000097	62-49-7	C00114				OEYIOHPDSNJKLS-UHFFFAOYSA-N	8.94123	8.81194	8.96052	8.90456	14.3359	14.9909	13.9251	14.4173	1.33603	0.00264365	0.0130168	1.61909	0.695185
765	Maltose	3.84	level1			365.104	418.4	POS	C12H22O11	HMDB0000163	69-79-4	C00208	Carbohydrates	Saccharides	Disaccharides	GUBGYTABKSRVRQ-DKBJLJRDSA-N	0.0849567	0.0839778	0.0821076	0.0836807	0.116402	0.122491	0.117667	0.118853	1.33436	6.57173e-05	0.00146901	1.42032	0.506215
766	4-Guanidinobutyric acid	3.84	level1			146.092	379.8	POS	C5H11N3O2	HMDB0003464	463-00-3	C01035	Amino acids and Peptides	Small peptides	Aminoacids	TUHVEAJXIMEOSA-UHFFFAOYSA-N	0.283097	0.249875	0.275487	0.269486	0.202527	0.185405	0.182412	0.190115	1.29001	0.00257853	0.0128061	0.705471	-0.503342
767	3-[4-methoxy-2-[(2S,3R,4S,5S,6R)-3,4,5-trihydroxy-6-(hydroxymethyl)tetrahydropyran-2-yl]oxy-phenyl]propanoic acid	3.84	level1			357.118	307.1	NEG	C16H22O9		477873-63-5					LIVNOUBJFOXZOR-YMILTQATSA-N	0.00779775	0.00473661	0.00814649	0.00689362	0.0125125	0.0135684	0.0111143	0.0123984	1.15061	0.0131685	0.0397561	1.79853	0.846819
768	1-Palmitoyllysophosphatidate	3.84	level1			409.236	302.1	NEG	C19H39O7P	HMDB0007853	22002-85-3	C04036	Fatty acids	Glycerophospholipids	Glycerophosphates	YNDYKPRNFWPPFU-UHFFFAOYSA-N	0.0113482	0.00960888	0.0100872	0.0103481	0.00599453	0.00508566	0.00354657	0.00487559	1.23658	0.00344536	0.0155249	0.471158	-1.08572
771	[5-hydroxy-6-[2-(4-hydroxy-3-methoxy-phenyl)ethoxy]-2-(hydroxymethyl)-4-(3,4,5-trihydroxy-6-methyl-tetrahydropyran-2-yl)oxy-tetrahydropyran-3-yl] (E)-3-(4-hydroxy-3-methoxy-phenyl)prop-2-enoate	3.84	level1			653.247	40.8	POS	C31H40O15				Shikimates and Phenylpropanoids	Phenylpropanoids (C6-C3)	Cinnamic acids and derivatives	RLGRBYHBNWLGER-RMKNXTFCSA-N	0.0499152	0.0423576	0.0584398	0.0502376	0.0897727	0.101193	0.0948052	0.0952569	1.28261	0.00139066	0.00857125	1.89613	0.923057
772	(3S,3'R,3'aS,6'S,6aS,6bS,7'aR,9R,11bR)-3-hydroxy-3',6',10,11b-tetramethyl-spiro[1,2,3,4,6,6a,6b,7,8,11a-decahydrobenzo[a]fluorene-9,2'-3a,4,5,6,7,7a-hexahydro-3H-furo[3,2-b]pyridine]-11-one	3.84	level1			426.299	37.4	POS	C27H39NO3		469-59-0		Alkaloids	Pseudoalkaloids	Steroidal alkaloids	CLEXYFLHGFJONT-GDMKTYFQSA-N	0.0396063	0.0259652	0.035662	0.0337445	0.264469	0.348939	0.322324	0.311911	1.32942	0.000386586	0.00383552	9.2433	3.20841
773	Maltotriose	3.83	level1			505.175	467.1	POS	C18H32O16	HMDB0001262	1109-28-0	C01835	Carbohydrates	Saccharides	Polysaccharides	FYGDTMLNYKFZSV-DZOUCCHMSA-N	0.00372633	0.00375028	0.00389789	0.0037915	0.00753535	0.00756181	0.00564282	0.00691333	1.27361	0.0381695	0.0878992	1.82337	0.866611
774	(1R,2R,5S,8R,14R,15R,16S)-16-hydroxy-8-isopropenyl-1,2,14,17,17-pentamethyl-pentacyclo[11.7.0.02,10.05,9.014,18]icosane-5,15-dicarboxylic acid	3.83	level1			485.327	463.8	NEG	C30H46O5		21302-79-4		Terpenoids	Triterpenoids	Abeolupane triterpenoids	WLCHQSHZHFLMJH-GAVPBTRYSA-N	0.00284378	0.0017862	0.00277238	0.00246745	0.133224	0.113728	0.22824	0.158397	1.33094	0.0477872	0.104208	64.1947	6.00438
775	Chiro-Inositol	3.83	level1			179.056	409	NEG	C6H12O6		643-12-9	C00137|C06153|C06151|C06152|C19891|D08079	Carbohydrates	Polyols	Cyclitols	CDAISMWEOUEBRE-LKPKBOIGSA-N	2.61931	2.72284	2.76682	2.70299	4.82625	4.66279	4.50309	4.66405	1.33549	4.48806e-05	0.00122145	1.72551	0.787026
776	(E)-6-(1,3-dihydroxy-4,4,8,10,14-pentamethyl-2,3,5,6,7,9,11,15,16,17-decahydro-1H-cyclopenta[a]phenanthren-17-yl)-2-methyl-hept-2-enoic acid	3.83	level1			471.347	495.8	NEG	C30H48O4				Terpenoids	Triterpenoids	Dammarane and Protostane triterpenoids	YQXLCRFLNIXKQV-VXLYETTFSA-N	0.0239093	0.0242926	0.0236856	0.0239625	0.220627	0.23717	0.278029	0.245276	1.33918	0.00588479	0.022429	10.2358	3.35555
778	(4S)-4-hydroxy-3,5,5-trimethyl-4-[(E,3R)-3-[(2R,3R,4S,5S,6R)-3,4,5-trihydroxy-6-(hydroxymethyl)tetrahydropyran-2-yl]oxybut-1-enyl]cyclohex-2-en-1-one	3.83	level1			385.187	256.1	NEG	C19H30O8		54835-70-0		Terpenoids	Apocarotenoids	Megastigmanes	SWYRVCGNMNAFEK-MHXFFUGFSA-N	0.0857875	0.105713	0.0951899	0.0955635	0.0437817	0.0447149	0.0422206	0.0435724	1.32453	0.0110684	0.0350439	0.455953	-1.13304
780	(Z)-6,9,10-trihydroxyoctadec-7-enoic acid	3.83	level1			329.233	392	NEG	C18H34O5				Fatty acids	Octadecanoids	Other Octadecanoids	KFPLVZLISLBBSJ-YPKPFQOOSA-N	28.9769	32.2528	29.8668	30.3655	22.4483	20.9609	20.3279	21.2457	1.30372	0.00142602	0.00870864	0.699667	-0.51526
781	3,5-Dimethoxycinnamic acid	3.83	level1			207.066	342.9	NEG	C11H12O4		16909-11-8		Shikimates and Phenylpropanoids	Phenylpropanoids (C6-C3)	Cinnamic acids and derivatives	VLSRUFWCGBMYDJ-ONEGZZNKSA-N	0.0274262	0.0272693	0.0263266	0.0270074	0.0490773	0.0495235	0.0404922	0.0463643	1.30181	0.0210843	0.0561279	1.71673	0.779662
782	Methyl caffeate	3.83	level1			193.05	292.3	NEG	C10H10O4		3843-74-1	C10477	Shikimates and Phenylpropanoids	Phenylpropanoids (C6-C3)	Cinnamic acids and derivatives	OCNYGKNIVPVPPX-HWKANZROSA-N	1.01131	0.990672	0.961862	0.987948	1.14303	1.08961	1.14864	1.12709	1.27058	0.00417283	0.0176993	1.14084	0.190097
787	Trolox	3.83	level1			249.113	339	NEG	C14H18O4	HMDB0038804	53188-07-1		Terpenoids	Meroterpenoids	Prenyl quinone meroterpenoids	GLEVLJDDWXEYCO-UHFFFAOYSA-N	0.0129419	0.0187859	0.0256368	0.0191216	0.0910277	0.0837409	0.0812538	0.0853408	1.29768	0.000146876	0.00223501	4.46306	2.15803
790	Eucommin A	3.83	level1			549.197	283	NEG	C27H34O12		99633-12-2	C10560	Shikimates and Phenylpropanoids	Lignans	Furofuranoid lignans	GLGVEKKQPFRBAS-YPQUEWMKSA-N	0.0494734	0.0352244	0.0471522	0.04395	0.0601157	0.0565373	0.0548363	0.0571631	1.04574	0.0476719	0.104024	1.30064	0.37922
791	Barlerin	3.83	level1			429.14	281.4	NEG	C19H28O12		57420-46-9		Terpenoids	Monoterpenoids	Iridoids monoterpenoids	ARFRZOLTIRQFCI-NGQYDJQZSA-N	0.114897	0.1189	0.123265	0.119021	0.2703	0.255757	0.249517	0.258525	1.33711	2.98695e-05	0.00101504	2.1721	1.11909
795	5-[(3aS,4S,6aR)-2,5,5-trioxo-1,3,3a,4,6,6a-hexahydrothieno[3,4-d]imidazol-4-yl]pentanoic acid	3.83	level1			259.074	97.2	POS	C10H16N2O5S		40720-05-6	C20387	Alkaloids			QPFQYMONYBAUCY-ZKWXMUAHSA-N	0.0336767	0.0351098	0.0350603	0.0346156	0.0426638	0.0430138	0.0385637	0.0414137	1.23586	0.0106541	0.0340888	1.19639	0.258687
796	Tyrosine O-sulfate	3.83	level1			260.023	81.2	NEG	C9H11NO6S	HMDB0155722	956-46-7		Amino acids and Peptides	Small peptides	Aminoacids	CIQHWLTYGMYQQR-QMMMGPOBSA-N	0.0626639	0.0653134	0.0632499	0.0637424	0.104141	0.0930328	0.0937139	0.0969627	1.31905	0.000837095	0.00616673	1.52116	0.605177
797	PC(35:5)	3.83	level1			766.535	602.6	POS	C43H76NO8P							CLZILUAYFAKZPA-BONSMSLRSA-N	0.00458439	0.00630835	0.00623012	0.00570762	0.0217383	0.0202664	0.0128388	0.0182812	1.27016	0.0110483	0.0349982	3.20294	1.6794
798	Pyropheophorbide-a	3.83	level1			535.269	551.3	POS	C33H34N4O3		24533-72-0		Alkaloids			IEGUQQKIFBYXLG-BSHCMTTLSA-N	0.0312834	0.0310875	0.0304755	0.0309488	0.044668	0.0438435	0.0393777	0.0426297	1.30112	0.0174948	0.0489155	1.37743	0.461975
799	Glutarylcarnitine	3.83	level1			276.144	420.8	POS	C12H21NO6	HMDB0013130	102636-82-8		Fatty acids	Fatty esters	Fatty acyl carnitines	NXJAXUYOQLTISD-SECBINFHSA-N	0.0355645	0.025286	0.0331422	0.0313309	0.114912	0.116181	0.108042	0.113045	1.32363	3.3973e-05	0.00107713	3.6081	1.85124
800	Metformin	3.83	level1			130.108	277.5	POS	C4H11N5	HMDB0001921	1115-70-4	C07151	Alkaloids			XZWYZXLIPXDOLR-UHFFFAOYSA-N	0.0643722	0.0586376	0.0636591	0.062223	0.0045905	0.00331808	0.0036598	0.00385613	1.33818	5.93907e-06	0.000532168	0.0619727	-4.01222
802	Pyridoxal (Vitamin B6)	3.83	level1			168.065	87.5	POS	C8H9NO3	HMDB0001545	66-72-8	C00250	Alkaloids	Nicotinic acid alkaloids	Pyridine alkaloids	RADKZDMFGJYCBB-UHFFFAOYSA-N	0.169482	0.147709	0.161553	0.159582	0.261636	0.238202	0.2242	0.241346	1.28744	0.00294104	0.0139891	1.51237	0.596808
803	Dihydrothymine	3.83	level1			129.065	67.7	POS	C5H8N2O2	HMDB0000079	696-04-8	C00906	Alkaloids			NBAKTGXDIBVZOO-UHFFFAOYSA-N	0.0237018	0.0275929	0.0401695	0.0304881	0.114536	0.102449	0.0976836	0.10489	1.29805	0.000458701	0.00424966	3.44035	1.78256
804	3,4,5-trihydroxybenzaldehyde	3.83	level1			153.019	65.4	NEG	C7H6O4		13677-79-7		Shikimates and Phenylpropanoids	Phenolic acids (C6-C1)	Shikimic acids and derivatives	RGZHEOWNTDJLAQ-UHFFFAOYSA-N	1.0178	1.08484	1.07791	1.06018	1.6702	1.63499	1.53841	1.61453	1.32632	0.000244678	0.00294215	1.52288	0.606802
806	Histamine	3.83	level1			112.087	437.8	POS	C5H9N3	HMDB0000870	51-45-6	C00388	Alkaloids	Histidine alkaloids	Imidazole alkaloids	NTYJJOPFIAHURM-UHFFFAOYSA-N	0.02366	0.0197394	0.019999	0.0211328	0.0264216	0.0275557	0.0257072	0.0265615	1.18416	0.0168639	0.0475986	1.25688	0.329851
807	10,11-dihydroxy-9-(hydroxymethyl)-1,2,6a,6b,9,12a-hexamethyl-2,3,4,5,6,6a,7,8,8a,10,11,12,13,14b-tetradecahydro-1H-picene-4a-carboxylic acid	3.82	level1			487.342	448.3	NEG	C30H48O5		464-92-6|76964-07-3		Terpenoids	Triterpenoids	Ursane and Taraxastane triterpenoids	JXSVIVRDWWRQRT-UHFFFAOYSA-N	0.0294846	0.0491338	0.0245851	0.0344012	2.02795	1.39271	2.84707	2.08924	1.32804	0.03946	0.0901502	60.7317	5.92438
808	2-[4-[3-(4-hydroxy-3-methoxy-phenyl)-1,3,3a,4,6,6a-hexahydrofuro[3,4-c]furan-6-yl]-2-methoxy-phenoxy]-6-(hydroxymethyl)tetrahydropyran-3,4,5-triol	3.82	level1			519.187	282.7	NEG	C26H32O11		11042-30-1		Shikimates and Phenylpropanoids	Lignans	Furofuranoid lignans	QLJNETOQFQXTLI-UHFFFAOYSA-N	0.117139	0.13329	0.128268	0.126232	0.094229	0.093693	0.0958621	0.0945947	1.29478	0.0203991	0.0547786	0.74937	-0.416249
811	1-(1H-indol-3-yl)ethanone	3.82	level1			160.075	45.3	POS	C10H9NO		703-80-0		Alkaloids	Tryptophan alkaloids	Simple indole alkaloids	VUIMBZIZZFSQEE-UHFFFAOYSA-N	0.00756546	0.00172655	0.00641025	0.00523409	0.0187678	0.0202444	0.0162371	0.0184164	1.12017	0.00349141	0.0156694	3.51856	1.81498
814	6-aminopyridine-3-carboxylic acid	3.82	level1			137.035	308.7	NEG	C6H6N2O2		3167-49-5		Amino acids and Peptides	Small peptides	Aminoacids	ZCIFWRHIEBXBOY-UHFFFAOYSA-N	0.0229935	0.0256829	0.0185376	0.0224047	0.0393344	0.0463431	0.0429931	0.0428902	1.27614	0.00213153	0.0113024	1.91434	0.936848
816	(2R,3S,4S,5R,6R)-2-[[(2R,3R,4R,5S)-3,4-dihydroxy-5-(hydroxymethyl)tetrahydrofuran-2-yl]oxymethyl]-6-(2-phenylethoxy)tetrahydropyran-3,4,5-triol	3.82	level1			415.161	268.3	NEG	C19H28O10				Shikimates and Phenylpropanoids	Phenylethanoids (C6-C2)	Phenylethanoids	DWYFWLYCTOAXKY-DXAFFUQDSA-N	0.425142	0.396425	0.392891	0.40482	0.0987993	0.101829	0.187461	0.129363	1.26463	0.000864982	0.00630493	0.319557	-1.64586
817	PC(35:4)	3.82	level1			768.55	617.8	POS	C43H78NO8P							BGVYCOAXLBCZLT-PBKMIANHSA-N	0.0342919	0.0341324	0.0360287	0.0348177	0.134321	0.103751	0.097602	0.111892	1.32194	0.0207698	0.0555067	3.21364	1.68421
818	PC(32:3)	3.82	level1			728.52	603.6	POS	C40H74NO8P							SZQDXEHIZDXKND-POQGOOHWSA-N	0.00881189	0.00999672	0.00978316	0.00953059	0.0415537	0.0405782	0.0342843	0.0388054	1.33452	0.00507485	0.0202653	4.07167	2.02562
821	(2Z,6E,10Z)-12-acetoxy-10-(acetoxymethyl)-6-methyl-2-(4-methylpent-3-enyl)dodeca-2,6,10-trienoic acid	3.82	level1			401.233	464.6	NEG	C24H36O6				Terpenoids	Diterpenoids	Phytane diterpenoids	HIKQPXPTFKUOGM-POVULIOGSA-N	0.00590407	0.00658193	0.00850535	0.00699712	0.0143256	0.0147304	0.0150896	0.0147152	1.28848	0.000676531	0.00541045	2.10304	1.07247
822	Hexadecadienedioylcarnitine (Car(16:2-O2))	3.82	level1			426.289	407.8	POS	C23H39NO6							PADQSLVCFUGLPR-SBLPRGNDSA-N	0.00162838	0.00129551	0.000972965	0.00129895	0.0101065	0.0112386	0.0105564	0.0106338	1.32808	1.6228e-05	0.000783056	8.18649	3.03325
823	(10S,11R)-1,10,11-trihydroxy-9-(hydroxymethyl)-1,2,6a,6b,9,12a-hexamethyl-2,3,4,5,6,6a,7,8,8a,10,11,12,13,14b-tetradecahydropicene-4a-carboxylic acid	3.82	level1			503.337	373.9	NEG	C30H48O6				Terpenoids	Triterpenoids	Ursane and Taraxastane triterpenoids	YCOKATFNRPZIIU-FYQRVOBBSA-N	0.00153768	0.00652634	0.00131126	0.00312509	0.219902	0.206621	0.286511	0.237678	1.30862	0.010643	0.0340645	76.0548	6.24897
824	2-hydroxy-3-[(12-hydroxy-4-methyl-2,9-dioxo-4,5,6,7,8,8a,10,11,12,12a-decahydro-1H-benzo[d]oxecin-11-yl)sulfanyl]propanoic acid	3.82	level1			355.121	341	NEG	C17H26O7S				Polyketides	Macrolides	Macrolide lactones	KUAXOGAXEHNLKN-UHFFFAOYSA-N	0.0415848	0.0436891	0.0438686	0.0430475	0.0673208	0.0598489	0.0621394	0.063103	1.31436	0.000998845	0.00692553	1.46589	0.55178
828	[6-[3,4-dihydroxy-2,5-bis(hydroxymethyl)tetrahydrofuran-2-yl]oxy-3,4,5-trihydroxy-tetrahydropyran-2-yl]methyl (E)-3-(4-hydroxy-3-methoxy-phenyl)prop-2-enoate	3.82	level1			517.156	255	NEG	C22H30O14		137941-45-8		Shikimates and Phenylpropanoids	Phenylpropanoids (C6-C3)	Cinnamic acids and derivatives	XMBZZLUIFFOAHR-HWKANZROSA-N	0.259257	0.228156	0.201971	0.229795	0.339484	0.323712	0.355911	0.339702	1.24975	0.00442759	0.0184247	1.47828	0.563924
829	2,6-Dimethoxy-1,4-benzoquinone	3.82	level1			169.049	236.6	POS	C8H8O4	HMDB0029673	530-55-2	C10331	Polyketides	Aromatic polyketides	Benzoquinones	OLBNOBQOQZRLMP-UHFFFAOYSA-N	0.0394837	0.0378034	0.0421845	0.0398239	0.0472839	0.0460816	0.0498857	0.0477504	1.22988	0.00956328	0.031594	1.19904	0.26188
831	Galactose 1-phosphate	3.82	level1			259.022	40	NEG	C6H13O9P	HMDB0000645	2255-14-3	C00446	Carbohydrates	Saccharides	Monosaccharides	HXXFSFRBOHSIMQ-FPRJBGLDSA-N	0.213987	0.197856	0.215977	0.209273	0.143263	0.105188	0.127508	0.12532	1.26196	0.0025185	0.0126115	0.598833	-0.739774
832	Formiminoglutamic acid	3.82	level1			175.071	418.4	POS	C6H10N2O4	HMDB0000854	816-90-0	C00439	Amino acids and Peptides	Small peptides	Aminoacids	NRXIKWMTVXPVEF-BYPYZUCNSA-N	0.00966504	0.0109155	0.0103942	0.0103249	0.0193107	0.0184247	0.0175122	0.0184159	1.32542	0.000216324	0.00276868	1.78363	0.834819
833	(2R,3R,4S,5S,6R)-2-benzyloxy-6-[[(2R,3R,4R)-3,4-dihydroxy-4-(hydroxymethyl)tetrahydrofuran-2-yl]oxymethyl]tetrahydropyran-3,4,5-triol	3.82	level1			401.144	233.6	NEG	C18H26O10		115009-57-9		Shikimates and Phenylpropanoids			NJMQSVWMCODQIP-FQXXIRCGSA-N	0.163066	0.149713	0.160993	0.157924	0.256682	0.236847	0.247248	0.246926	1.32477	0.000229546	0.00283138	1.56357	0.644846
834	Amantadine	3.82	level1			152.143	205.9	POS	C10H17N	HMDB0015051	768-94-5	C06818				DKNWSYNQZKUICI-UHFFFAOYSA-N	0.000678715	0.000442744	0.000535335	0.000552264	0.00738198	0.00619239	0.00547683	0.0063504	1.33135	0.00829349	0.0285196	11.4988	3.52342
835	2-methyl-3-[(2S,3R,4S,5S,6R)-3,4,5-trihydroxy-6-(hydroxymethyl)tetrahydropyran-2-yl]oxy-pyran-4-one	3.82	level1			269.066	197.6	NEG	C12H16O8		20847-13-6		Polyketides	Cyclic polyketides	4-pyrone derivatives	YGSIRXHFAUFUEJ-GPTQDWHKSA-N	1.89864	1.89973	1.91286	1.90374	1.66367	1.67303	1.55676	1.63115	1.28478	0.0170345	0.0479563	0.856812	-0.222949
838	(4aS,6aS,6bR,9R,10S,11R,12aR)-10,11-dihydroxy-9-(hydroxymethyl)-2,2,6a,6b,9,12a-hexamethyl-1,3,4,5,6,6a,7,8,8a,10,11,12,13,14b-tetradecahydropicene-4a-carboxylic acid	3.81	level1			487.342	76.6	NEG	C30H48O5				Terpenoids	Triterpenoids	Oleanane triterpenoids	RWNHLTKFBKYDOJ-FLKVJBKRSA-N	0.095256	0.126239	0.111251	0.110915	1.54615	1.5464	2.11449	1.73568	1.3353	0.0131683	0.0397561	15.6487	3.96797
839	(10S,11R)-10,11-dihydroxy-9-(hydroxymethyl)-1,6a,6b,9,12a-pentamethyl-2-methylidene-1,3,4,5,6,6a,7,8,8a,10,11,12,13,14b-tetradecahydropicene-4a-carboxylic acid	3.81	level1			485.327	463.8	NEG	C30H46O5				Terpenoids	Triterpenoids	Ursane and Taraxastane triterpenoids	FFMVHFPLIIYYNC-LSMGVCMUSA-N	0.00284378	0.0017862	0.00277238	0.00246745	0.133224	0.113728	0.22824	0.158397	1.33094	0.0477872	0.104208	64.1947	6.00438
841	3,5-Di-tert-butylphenol	3.81	level1			205.159	496.6	NEG	C14H22O		1138-52-9		Shikimates and Phenylpropanoids			ZDWSNKPLZUXBPE-UHFFFAOYSA-N	0.133589	0.130597	0.147095	0.137094	0.0632868	0.0588134	0.0546182	0.0589061	1.33001	0.000158974	0.00233278	0.429677	-1.21867
843	Phloroglucinaldehyde	3.81	level1			153.019	277.2	NEG	C7H6O4	HMDB0125090	487-70-7		Polyketides	Phloroglucinols	Acyl phloroglucinols	BTQAJGSMXCDDAJ-UHFFFAOYSA-N	0.507004	0.448264	0.498401	0.484556	0.161298	0.162014	0.170247	0.16452	1.33748	0.00269375	0.0131864	0.339527	-1.5584
845	PC(40:9)	3.81	level1			828.55	590.3	POS	C48H78NO8P							SOKBMQXQMOKROU-VHLYIUHQSA-N	0.00531409	0.00252377	0.00510462	0.00431416	0.0218881	0.0204038	0.0193716	0.0205545	1.28363	0.000149418	0.00225832	4.76443	2.2523
849	7-[(2E,6E,10S)-10,11-dihydroxy-3,7,11-trimethyl-dodeca-2,6-dienoxy]chromen-2-one	3.81	level1			399.217	447	NEG	C24H32O5				Shikimates and Phenylpropanoids	Coumarins	Simple coumarins	SOTUFGKJQVSOCT-DZMBJMNISA-N	0.00311538	0.00544052	0.00358458	0.00404683	0.0137012	0.0110226	0.0120672	0.0122637	1.27926	0.00146198	0.00884915	3.03044	1.59953
851	(3S)-3-acetoxy-3-[(1R,2R,5R,6R,10S,11S,14S)-11-(3-furyl)-5-(1-hydroxy-1-methyl-ethyl)-2,6,10-trimethyl-3,13-dioxo-12,15-dioxatetracyclo[8.5.0.01,14.02,7]pentadecan-6-yl]propanoic acid	3.81	level1			513.211	350.6	NEG	C28H36O10				Terpenoids	Triterpenoids	Limonoids	ZIKZPLSIAVHITA-FBCIBIQSSA-N	0.0590098	0.0496305	0.0560433	0.0548945	0.11587	0.117208	0.117722	0.116933	1.32923	2.53505e-05	0.000944771	2.13015	1.09095
854	2-[(1R,2R)-3-oxo-2-[(Z)-5-[3,4,5-trihydroxy-6-(hydroxymethyl)tetrahydropyran-2-yl]oxypent-2-enyl]cyclopentyl]acetic acid	3.81	level1			387.166	249.7	NEG	C18H28O9		124649-25-8		Fatty acids	Fatty acyl glycosides	Fatty acyl glycosides of mono- and disaccharides	JFDNMLUPLXZXGV-YAYCWVCRSA-N	0.10611	0.139592	0.112662	0.119455	0.371195	0.359586	0.342124	0.357635	1.32537	5.67899e-05	0.00136786	2.9939	1.58203
855	methyl 1-methyl-2'-oxo-spiro[1,4a,5,5a,7,8,10,10a-octahydropyrano[3,4-f]indolizine-6,3'-indoline]-4-carboxylate	3.81	level1			369.18	48.3	POS	C21H24N2O4		4697-68-1|5629-60-7		Alkaloids	Tryptophan alkaloids	Simple indole alkaloids	JMIAZDVHNCCPDM-UHFFFAOYSA-N	0.0110216	0.00842131	0.0430488	0.0208306	0.0643811	0.0691869	0.0718309	0.0684663	1.10228	0.0137127	0.040938	3.28681	1.71669
858	N-Methylglutamic acid	3.81	level1			162.076	386.4	POS	C6H11NO4	HMDB0062660	35989-16-3	C01046	Amino acids and Peptides	Small peptides	Aminoacids	XLBVNMSMFQMKEY-BYPYZUCNSA-N	0.0115042	0.0109067	0.0104701	0.0109603	0.0293389	0.0301386	0.0258885	0.0284553	1.33302	0.000197514	0.00263614	2.59622	1.37641
861	Glucotropaeolin	3.81	level1			408.044	59.5	NEG	C14H19NO9S2		5115-71-9		Amino acids and Peptides	Amino acid glycosides	Glucosinolates	QQGLQYQXUKHWPX-XNTDXEJSSA-N	0.0325676	0.0295679	0.0312999	0.0311451	0.0232906	0.0245411	0.0284961	0.0254426	1.12513	0.0335583	0.0797266	0.816904	-0.291761
862	Phenacetin	3.8	level1			180.101	46.6	POS	C10H13NO2	HMDB0256387	62-44-2	C07591	Alkaloids			CPJSUEIXXCENMM-UHFFFAOYSA-N	0.00260049	0.00301554	0.00328324	0.00296642	0.00484827	0.00613955	0.00494131	0.00530971	1.26635	0.00705424	0.0254264	1.78994	0.839909
863	Medicagenic acid	3.8	level1			501.322	444.1	NEG	C30H46O6		599-07-5		Terpenoids	Triterpenoids	Oleanane triterpenoids	IDGXIXSKISLYAC-WNTKNEGGSA-N	0.00156039	0.000560471	0.00269846	0.00160644	0.0688085	0.0456688	0.0751574	0.0632116	1.30017	0.0200993	0.0541848	39.3488	5.29825
864	Pyrogallol	3.8	level1			127.039	95.2	POS	C6H6O3	HMDB0013674	87-66-1	C01108	Shikimates and Phenylpropanoids			WQGWDDDVZFFDIG-UHFFFAOYSA-N	0.0610646	0.0632341	0.0603315	0.0615434	0.0719821	0.0845878	0.0740943	0.0768881	1.21565	0.01843	0.0508282	1.24933	0.321156
866	PC(40:7)	3.8	level1			832.581	618	POS	C48H82NO8P							OKVMMSHMUNQJJW-YNQDRSMJSA-N	0.00386312	0.00436882	0.00394069	0.00405754	0.0172609	0.0138816	0.0166363	0.0159263	1.33279	0.0065758	0.0242382	3.92511	1.97273
867	PC(40:8)	3.8	level1			830.565	603.6	POS	C48H80NO8P							LOOKZZZTFVYXKM-SXDDUYMLSA-N	0.0065944	0.00735414	0.00609586	0.00668147	0.0273395	0.0268207	0.0216207	0.0252603	1.32869	0.000567133	0.0048507	3.78065	1.91863
869	LPC(18:0/0:0)	3.8	level1			524.369	541.9	POS	C26H54NO7P	HMDB0010384	19420-57-6		Fatty acids	Glycerophospholipids	Glycerophosphocholines	IHNKQIMGVNPMTC-RUZDIDTESA-N	0.511649	0.480502	0.528337	0.50683	0.845174	0.861915	0.737248	0.814779	1.30488	0.00176101	0.009982	1.6076	0.684908
871	methyl 2-(2,6-dihydroxy-4-methyl-benzoyl)-3,5-dimethoxy-benzoate	3.8	level1			327.087	383	NEG	C18H18O7		77282-69-0		Polyketides	Aromatic polyketides	Benzophenones	YLCJNMGKCHGJRF-UHFFFAOYSA-N	0.00122508	0.00148033	0.0016326	0.00144601	0.00215137	0.00312147	0.00378963	0.00302083	1.19074	0.0325141	0.0778298	2.08908	1.06287
872	(10E,15Z)-9,12,13-trihydroxyoctadeca-10,15-dienoic acid	3.8	level1			327.217	376.6	NEG	C18H32O5		185147-97-1		Fatty acids	Octadecanoids	Other Octadecanoids	MKYUCBXUUSZMQB-MKZMYESJSA-N	11.8743	14.1433	12.894	12.9705	8.04137	7.6384	7.32433	7.66803	1.31052	0.00152663	0.00909866	0.591188	-0.75831
873	5-hydroxy-1,7-bis(4-hydroxyphenyl)heptan-3-one	3.8	level1			313.147	329.7	NEG	C19H22O4		41137-85-3		Shikimates and Phenylpropanoids	Diarylheptanoids	Linear diarylheptanoids	ZBFSUZGUYFFWGY-UHFFFAOYSA-N	0.00698056	0.0245433	0.00730642	0.0129434	0.0623194	0.053525	0.0525686	0.0561377	1.19817	0.00278382	0.0134813	4.33715	2.11675
874	(E)-4-hydroxydodec-2-enedioic acid	3.8	level1			243.123	324.4	NEG	C12H20O5				Fatty acids	Fatty Acids and Conjugates	Dicarboxylic acids	UHLUIRZFRDVZGV-CMDGGOBGSA-N	1.61365	1.85522	1.74854	1.73913	0.199053	0.184692	0.197879	0.193874	1.34031	0.0019633	0.0107155	0.111478	-3.16517
877	Trp-Gly	3.8	level1			262.118	216.4	POS	C13H15N3O3	HMDB0029083	7360-09-0		Amino acids and Peptides	Small peptides	Dipeptides	UYKREHOKELZSPB-JTQLQIEISA-N	0.0174707	0.0160147	0.0164604	0.0166486	0.0272289	0.0266637	0.0247479	0.0262135	1.32236	0.000381237	0.00380465	1.57452	0.65491
879	3,3-Dimethylglutaric acid	3.8	level1			159.066	70.6	NEG	C7H12O4	HMDB0002441	4839-46-7		Fatty acids	Fatty Acids and Conjugates	Dicarboxylic acids	DUHQIGLHYXLKAE-UHFFFAOYSA-N	0.275126	0.327501	0.311562	0.30473	0.0459157	0.0379667	0.0399713	0.0412846	1.33766	0.00287288	0.0137746	0.135479	-2.88386
883	PC(16:0/18:0)	3.79	level1			744.587	553.2	POS	C42H84NO8P	HMDB0007970	59403-51-9		Fatty acids	Glycerophospholipids	Glycerophosphocholines	PZNPLUBHRSSFHT-RRHRGVEJSA-N	0.0128048	0.0148507	0.0148247	0.0141601	0.00659902	0.00212413	0.00702314	0.00524876	1.09984	0.00643027	0.0238618	0.370673	-1.43178
885	Ascorbyl palmitate	3.79	level1			415.268	524.2	POS	C22H38O7	HMDB0039883	137-66-6		Fatty acids	Fatty esters	Wax monoesters	QAQJMLQRFWZOBN-UHFFFAOYSA-N	0.0016187	0.00119679	0.00152198	0.00144582	0.00271309	0.00282637	0.00271209	0.00275052	1.28967	0.000607609	0.00506224	1.90239	0.92781
889	5-hydroxy-2-phenyl-7-[(2S,3R,4S,5S,6R)-3,4,5-trihydroxy-6-[[(2R,3R,4S,5S,6R)-3,4,5-trihydroxy-6-(hydroxymethyl)tetrahydropyran-2-yl]oxymethyl]tetrahydropyran-2-yl]oxy-chromen-4-one	3.79	level1			579.172	292.7	POS	C27H30O14		88640-89-5		Shikimates and Phenylpropanoids	Flavonoids	Flavones	XGMGGAPZYUWNMO-IPOZFMEPSA-N	0.0024401	0.00234186	0.00306887	0.00261695	0.00545515	0.00528597	0.00458737	0.0051095	1.28627	0.00205195	0.0110236	1.95247	0.965297
890	Desaminotyrosine	3.79	level1			165.055	284.9	NEG	C9H10O3	HMDB0002199	501-97-3	C01744	Shikimates and Phenylpropanoids			NMHMNPHRMNGLLB-UHFFFAOYSA-N	0.235199	0.237817	0.24009	0.237702	0.447877	0.412462	0.388968	0.416436	1.32696	0.00870044	0.029506	1.75192	0.808939
891	N-Acetylphenylalanine	3.79	level1			206.082	257	NEG	C11H13NO3	HMDB0000512	2018-61-3	C03519	Amino acids and Peptides	Small peptides	Dipeptides	CBQJSKKFNMDLON-JTQLQIEISA-N	3.72519	4.06623	4.00175	3.93106	3.25815	3.05148	2.96684	3.09215	1.2771	0.00348323	0.0156473	0.786596	-0.346306
892	Rizatriptan (benzoate)	3.79	level1			390.196	217.2	NEG	C22H25N5O2		145202-66-0	D00675	Alkaloids	Tryptophan alkaloids	Simple indole alkaloids	JPRXYLQNJJVCMZ-UHFFFAOYSA-N	0.00332688	0.00345453	0.00528015	0.00402052	0.16941	0.141312	0.133653	0.148125	1.3359	0.00551456	0.0214374	36.8422	5.20329
893	Crotonoside	3.79	level1			284.098	73.8	POS	C10H13N5O5		1818-71-9	C08432	Carbohydrates	Nucleosides	Purine nucleos(t)ides	MIKUYHXYGGJMLM-UUOKFMHZSA-N	0.243849	0.205929	0.224514	0.224764	0.351602	0.331692	0.338398	0.340564	1.30193	0.000734622	0.00570068	1.51521	0.599515
894	3-Aminobutanoic acid	3.79	level1			102.056	391.2	NEG	C4H9NO2		541-48-0		Amino acids and Peptides	Small peptides	Aminoacids	OQEBBZSWEGYTPG-UHFFFAOYSA-N	4.98933	4.91754	5.12204	5.00964	5.77534	5.71387	5.29979	5.59634	1.1821	0.0218399	0.0576143	1.11711	0.159777
896	Gabapentin	3.79	level1			172.133	267.5	POS	C9H17NO2	HMDB0005015	60142-96-3	C07018|D00332	Amino acids and Peptides	Small peptides	Aminoacids	UGJMXCAKCUNAIE-UHFFFAOYSA-N	0.0291223	0.024945	0.0264397	0.0268356	0.181814	0.184037	0.169292	0.178381	1.33949	5.74997e-06	0.000526349	6.64717	2.73274
898	5'-Deoxyadenosine	3.79	level1			252.107	113.9	POS	C10H13N5O3	HMDB0001983	4754-39-6	C05198	Carbohydrates	Nucleosides	Purine nucleos(t)ides	XGYIMTFOTBMPFP-KQYNXXCUSA-N	0.00663995	0.00716823	0.00739951	0.00706923	0.0178856	0.0159746	0.0136142	0.0158248	1.31187	0.00222372	0.0116302	2.23854	1.16256
899	Sodium lauryl sulfoacetate	3.79	level1			307.155	49.9	NEG	C14H28O5S		1847-58-1		Fatty acids	Fatty esters	Wax monoesters	LBIZZGIYNNLXQN-UHFFFAOYSA-N	1.61972	1.76933	1.65586	1.68164	0.459055	0.496332	0.518338	0.491242	1.33796	1.60537e-05	0.000780694	0.292121	-1.77536
902	gamma-CEHC (gamma-Carboxyethyl hydrochroman)	3.78	level1			263.128	101	NEG	C15H20O4	HMDB0001931	178167-75-4		Terpenoids	Meroterpenoids	Prenyl quinone meroterpenoids	VMJQLPNCUPGMNQ-UHFFFAOYSA-N	0.336937	0.336183	0.346635	0.339918	0.388057	0.381745	0.369783	0.379861	1.28086	0.00322119	0.0148522	1.11751	0.160286
907	NAE(22:0)	3.78	level1			384.382	607.6	POS	C24H49NO2		94109-05-4		Fatty acids	Fatty amides	N-acyl ethanolamines (endocannabinoids)	XHFWUECSNJWBJU-UHFFFAOYSA-N	0.00785222	0.00994731	0.00928719	0.0090289	0.017975	0.0173423	0.0194531	0.0182568	1.30999	0.00046658	0.00429702	2.02204	1.01581
908	PC(P-32:0)	3.78	level1			700.555	555.2	POS	C40H80NO7P	HMDB0011206	126901-45-9		Fatty acids	Glycerophospholipids	Glycerophosphocholines	PEWXKAOBUSBJLD-MCBGMKGZSA-N	0.00419328	0.00544444	0.00488276	0.00484016	0.00323319	0.00281911	0.00376697	0.00327309	1.16333	0.0260249	0.065708	0.676235	-0.564403
914	Forskolin	3.78	level1			409.221	428.1	NEG	C22H34O7		66575-29-9	C09076|D03584	Terpenoids	Diterpenoids	Labdane diterpenoids	OHCQJHSOBUTRHG-KGGHGJDLSA-N	0.0444348	0.0475484	0.0459551	0.0459794	0.0324181	0.0300866	0.0304932	0.0309993	1.32624	0.000201207	0.0026604	0.674199	-0.568754
916	Rhodiosin	3.78	level1			611.159	291.1	POS	C27H30O16				Shikimates and Phenylpropanoids	Flavonoids	Flavonols	WXBBQBYCUTXTJQ-ULMXTSOFSA-N	0.0432357	0.0680167	0.0523993	0.0545506	0.0207353	0.0207256	0.0203576	0.0206062	1.29338	0.0425045	0.0954158	0.377744	-1.40452
918	(4S)-4-hydroxy-3,5,5-trimethyl-4-[(1E,3E)-3-methyl-5-[(2R,3R,4S,5S,6R)-3,4,5-trihydroxy-6-(hydroxymethyl)tetrahydropyran-2-yl]oxy-penta-1,3-dienyl]cyclohex-2-en-1-one	3.78	level1			411.202	280.8	NEG	C21H32O8		145153-00-0		Terpenoids	Apocarotenoids	Apocarotenoids(ε-)	PMGQCIZHFNQTAO-LWJKYDNQSA-N	0.022127	0.0220754	0.0229463	0.0223829	0.0465853	0.0442707	0.0423424	0.0443995	1.33619	6.2695e-05	0.00143419	1.98363	0.988146
919	7-ethyl-8-hydroxy-4,7-dimethyl-6-oxo-8H-isochromene-3-carboxylic acid	3.78	level1			263.092	274.3	NEG	C14H16O5				Polyketides	Chromanes	Azaphilones	CNXACDYPVKUDEK-UHFFFAOYSA-N	0.0303689	0.034867	0.0338717	0.0330359	0.430788	0.312917	0.295954	0.346553	1.33386	0.0177207	0.0493716	10.4902	3.39097
920	5-Hydroxyhexanoic acid	3.78	level1			115.075	218.3	POS	C6H12O3	HMDB0000525	44843-89-2		Fatty acids	Fatty Acids and Conjugates	Hydroxy fatty acids	YDCRNMJQROAWFT-UHFFFAOYSA-N	0.0238003	0.0262506	0.033284	0.0277783	0.0516379	0.0550726	0.0500665	0.052259	1.27665	0.00157549	0.00928536	1.88129	0.91172
921	Dopamine	3.78	level1			136.075	65.2	POS	C8H11NO2	HMDB0000073	62-31-7	C03758	Alkaloids	Tyrosine alkaloids	Phenylethylamines	VYFYYTLLBUKUHU-UHFFFAOYSA-N	0.0276655	0.0221266	0.0328525	0.0275482	0.260104	0.239477	0.273335	0.257639	1.33367	2.40199e-05	0.000922968	9.35227	3.22532
922	(3S,4R,6aR,6bS,8aS,11R,12R,12aS,14bR)-3,12-dihydroxy-4,6a,6b,11,12,14b-hexamethyl-8a-[(2S,3R,4S,5S,6R)-3,4,5-trihydroxy-6-[[(2R,3R,4S,5S,6R)-3,4,5-trihydroxy-6-(hydroxymethyl)tetrahydropyran-2-yl]oxymethyl]tetrahydropyran-2-yl]oxycarbonyl-1,2,3,4a,5,6,7,8,9,10,11,12a,14,14a-tetradecahydropicene-4-carboxylic acid	3.78	level1			825.426	353.9	NEG	C42H66O16				Terpenoids	Triterpenoids	Ursane and Taraxastane triterpenoids	LCQFYEBJTAIMPC-PVSIORMYSA-N	1.17468e-05	1.2935e-05	1.24167e-05	1.23661e-05	0.000617285	0.000585723	0.000682151	0.000628386	1.341	0.00211366	0.0112432	50.8151	5.66719
923	Scopine	3.78	level1			156.101	169.6	POS	C8H13NO2		498-45-3		Alkaloids	Ornithine alkaloids	Tropane alkaloids	FIMXSEMBHGTNKT-UPGAHCIJSA-N	0.0917404	0.101795	0.103327	0.098954	0.0312501	0.0330822	0.026558	0.0302968	1.33061	7.60106e-05	0.00159051	0.30617	-1.70759
926	Tetrahydroepiberberine	3.77	level1			340.157	259.8	POS	C20H21NO4		38853-67-7	C17898	Alkaloids	Tyrosine alkaloids	Isoquinoline alkaloids	UWEHVAXMSWXKRW-UHFFFAOYSA-N	0.190709	0.171309	0.575247	0.312422	1.61215	1.5701	1.42533	1.53586	1.22579	0.00102983	0.00705705	4.91599	2.29748
927	(1S,4aR,6aS,6bR,9R,10R,11R,12aR,14bS)-1,10,11-trihydroxy-9-(hydroxymethyl)-2,2,6a,6b,9,12a-hexamethyl-1,3,4,5,6,6a,7,8,8a,10,11,12,13,14b-tetradecahydropicene-4a-carboxylic acid	3.77	level1			503.337	373.9	NEG	C30H48O6		58880-25-4		Terpenoids	Triterpenoids	Oleanane triterpenoids	IFIQVSCCFRXSJV-ZIZFEDMCSA-N	0.00153768	0.00652634	0.00131126	0.00312509	0.219902	0.206621	0.286511	0.237678	1.30862	0.010643	0.0340645	76.0548	6.24897
932	Allopurinol	3.77	level1			137.045	80.1	POS	C5H4N4O	HMDB0014581	315-30-0		Alkaloids	Pseudoalkaloids	pteridine alkaloids	OFCNXPDARWKPPY-UHFFFAOYSA-N	0.0950915	0.103064	0.098966	0.0990404	0.0716452	0.0711041	0.0702011	0.0709835	1.32771	0.000277252	0.00315654	0.716713	-0.480533
933	2-Hydroxy-6-methoxybenzoic acid	3.77	level1			167.035	257.7	NEG	C8H8O4		3147-64-6		Shikimates and Phenylpropanoids	Phenolic acids (C6-C1)	Simple phenolic acids	AAUQLHHARJUJEH-UHFFFAOYSA-N	2.25461	2.31926	2.34928	2.30772	2.77704	2.63234	2.59233	2.66723	1.27196	0.0045748	0.0188512	1.15579	0.208878
936	4-hydroxy-3',6-dimethoxy-5'-methyl-spiro[benzofuran-2,4'-cyclohex-2-ene]-1',3-dione	3.77	level1			303.09	312.5	NEG	C16H16O6				Polyketides	Aromatic polyketides	Griseofulvins	RFVMVHYMAGKNDK-UHFFFAOYSA-N	1.26951	1.32132	1.2576	1.28281	1.70302	1.60757	1.55382	1.62147	1.29729	0.00209679	0.0111898	1.264	0.337997
937	6-[4-hydroxy-2-methyl-6-[(2S,3R,4S,5S,6R)-3,4,5-trihydroxy-6-(hydroxymethyl)tetrahydropyran-2-yl]oxy-phenyl]-4-methoxy-pyran-2-one	3.77	level1			409.114	292	NEG	C19H22O10		38412-46-3		Polyketides	Cyclic polyketides	2-pyrone derivatives	KFJNVVJUICKJEQ-LQDZTQBFSA-N	0.213831	0.240028	0.256247	0.236702	0.0284289	0.0288709	0.015096	0.024132	1.31796	8.58684e-05	0.00169092	0.101951	-3.29405
938	5-hydroxy-2-(4-hydroxy-3-methoxy-phenyl)-7-[(2S,3R,4S,5S,6R)-3,4,5-trihydroxy-6-[[(2R,3R,4R,5R,6S)-3,4,5-trihydroxy-6-methyl-tetrahydropyran-2-yl]oxymethyl]tetrahydropyran-2-yl]oxy-chroman-4-one	3.77	level1			591.165	279.9	NEG	C28H34O15		150172-22-8		Shikimates and Phenylpropanoids	Flavonoids	Flavanones	APSNPMVGBGZYAJ-ATDINVGTSA-N	0.194603	0.219477	0.208025	0.207368	0.0262582	0.0241619	0.0238467	0.0247556	1.34028	0.00139444	0.008588	0.11938	-3.06637
939	Histidine	3.77	level1			156.076	45.6	POS	C6H9N3O2	HMDB0000177	71-00-1	C00135	Amino acids and Peptides	Small peptides	Aminoacids	HNDVDQJCIGZPNO-YFKPBYRVSA-N	0.527709	0.480445	0.502186	0.503447	0.725759	0.78405	0.732282	0.747364	1.31944	0.000443512	0.00416789	1.48449	0.569971
945	Fomepizole	3.77	level1			83.0602	63.1	POS	C4H6N2	HMDB0015344	7554-65-6	C07837	Alkaloids	Nicotinic acid alkaloids	Pyridine alkaloids	RIKMMFOAQPJVMX-UHFFFAOYSA-N	0.0154149	0.0146085	0.0157957	0.015273	0.0283359	0.0255509	0.0227436	0.0255435	1.29669	0.00340625	0.0154116	1.67246	0.741968
946	Phenothiazine	3.77	level1			200.055	52	POS	C12H9NS	HMDB0302434	92-84-2	D02601	Alkaloids	Anthranilic acid alkaloids	Phenazine alkaloids	WJFKNYWRSNBZNX-UHFFFAOYSA-N	0.0350288	0.0398208	0.0375339	0.0374612	0.114445	0.0996463	0.0862517	0.100114	1.31944	0.00161931	0.00945062	2.67248	1.41818
947	(1S,2R,9R,11R,12R,15R)-11-hydroxy-2,6,9,15-tetramethyl-13-oxatetracyclo[10.2.1.02,10.05,9]pentadeca-4,6-diene-3,8,14-trione	3.77	level1			315.127	28.2	NEG	C18H20O5				Terpenoids	Sesquiterpenoids		CHTGFNQFMFSMRT-OJBHIARWSA-N	0.0323224	0.0357069	0.058553	0.0421941	1.59563	1.91927	1.50073	1.67188	1.33392	0.00582367	0.0222689	39.6235	5.30828
950	5-[2-(3,4-dihydroxy-2,5-dimethoxyoxolan-3-yl)ethyl]-1,4a-dimethyl-6-methylidene-3,4,5,7,8,8a-hexahydro-2H-naphthalene-1-carboxylic acid	3.77	level1			411.242	26.4	NEG	C22H36O7				Terpenoids	Diterpenoids	Labdane diterpenoids	ZVVJVAKXIGRPRA-UHFFFAOYSA-N	0.328503	0.422314	0.404335	0.385051	0.0294729	0.0483682	0.0532537	0.0436983	1.3199	0.000324882	0.00346077	0.113487	-3.1394
953	coumaroyl(3-OMe)(-2)Glc(a1-2b)L-Fruf	3.76	level1			517.155	257	NEG	C22H30O14				Shikimates and Phenylpropanoids	Phenylpropanoids (C6-C3)	Cinnamic acids and derivatives	GFXQBGHEPGXJGM-KSLXGCCYSA-N	0.0103772	0.00658295	0.00945497	0.00880503	0.0309353	0.0249347	0.0274758	0.0277819	1.29747	0.000801767	0.0060067	3.15524	1.65775
954	3-Hydroxycinnamic acid	3.76	level1			163.04	294.1	NEG	C9H8O3	HMDB0001713	14755-02-3	C12621	Shikimates and Phenylpropanoids	Phenylpropanoids (C6-C3)	Cinnamic acids and derivatives	KKSDGJDHHZEWEP-SNAWJCMRSA-N	0.0745474	0.0670613	0.0760695	0.0725594	0.027716	0.0300165	0.0483728	0.0353684	1.21142	0.00636164	0.0236798	0.487441	-1.0367
957	[(1R)-2-hydroxy-1-[(1S,2R,4S,6S,8R,12S,13S,14S,19R)-12-hydroxy-1,2,8,14,18,18-hexamethyl-17-oxo-5-oxapentacyclo[11.8.0.02,10.04,9.014,19]henicos-9-en-6-yl]-2-methyl-propyl] acetate	3.76	level1			529.353	463.2	NEG	C32H50O6		443683-76-9		Terpenoids	Triterpenoids	Fusidane triterpenoids	KFWYQAKZMXFEFB-XKFNBYHKSA-N	0.000414009	0.000312516	0.000222975	0.0003165	0.00924853	0.00967002	0.00669767	0.00853874	1.33066	0.0122868	0.0378299	26.9786	4.75374
962	2-(1-hydroxy-1-methyl-ethyl)-4-methoxy-7-[[(2R,3R,4S,5S,6R)-3,4,5-trihydroxy-6-(hydroxymethyl)tetrahydropyran-2-yl]oxymethyl]-2,3-dihydrofuro[3,2-g]chromen-5-one	3.76	level1			467.159	253	NEG	C22H28O11		80681-45-4		Polyketides	Chromanes	Chromones	XIUVHOSBSDYXRG-RZMKGNTASA-N	0.234737	0.253318	0.21657	0.234875	0.849178	0.842075	0.760167	0.81714	1.33592	4.41654e-05	0.00121336	3.47904	1.79869
965	Thiamine	3.76	level1			265.111	379.8	POS	C12H17N4OS	HMDB0000235	59-43-8	C00378	Alkaloids	Nicotinic acid alkaloids	Pyridine alkaloids	JZRWCGZRTZMZEH-UHFFFAOYSA-N	0.645184	0.640405	0.663636	0.649742	2.33576	2.2999	2.14039	2.25868	1.34005	0.00121796	0.00786295	3.47628	1.79754
967	Nicotinamide N-oxide	3.76	level1			139.05	133.8	POS	C6H6N2O2	HMDB0002730	1986-81-8		Alkaloids	Peptide alkaloids		USSFUVKEHXDAPM-UHFFFAOYSA-N	0.0351566	0.0373308	0.0373062	0.0365979	0.012475	0.0141317	0.0112936	0.0126334	1.33061	2.57043e-05	0.000950501	0.345196	-1.53451
969	17-[5-hydroxy-6-(1-hydroxy-1-methyl-ethyl)tetrahydropyran-3-yl]-4,4,10,13,14-pentamethyl-1,2,5,6,9,11,12,15,16,17-decahydrocyclopenta[a]phenanthren-3-one	3.75	level1			471.347	495.8	NEG	C30H48O4				Terpenoids	Triterpenoids	Lanostane, Tirucallane and Euphane triterpenoids	RNETYSXHFSDFMM-UHFFFAOYSA-N	0.0239093	0.0242926	0.0236856	0.0239625	0.220627	0.23717	0.278029	0.245276	1.33918	0.00588479	0.022429	10.2358	3.35555
975	Sph(d18:2)	3.75	level1			298.273	458.7	POS	C18H35NO2	HMDB0242112	25696-03-1		Fatty acids	Sphingolipids	Sphingoid bases	KWDXKYNWAKMLKK-YQDZIVAPSA-N	0.0568056	0.0625399	0.0415324	0.053626	0.109562	0.0800406	0.0755231	0.0883751	1.11124	0.0484515	0.10538	1.64799	0.720708
976	Felbinac	3.75	level1			211.076	424.6	NEG	C14H12O2				Shikimates and Phenylpropanoids	Terphenyls	p-Terphenyls	QRZAKQDHEVVFRX-UHFFFAOYSA-N	0.0357284	0.0389103	0.03711	0.0372496	0.140338	0.10938	0.132094	0.127271	1.33022	0.00985348	0.0322606	3.41671	1.77261
977	(2R,6R)-2-methyl-4-oxo-6-[(3S,5R,7S,10S,13R,14R,15S,17R)-3,7,15-trihydroxy-4,4,10,13,14-pentamethyl-11-oxo-1,2,3,5,6,7,12,15,16,17-decahydrocyclopenta[a]phenanthren-17-yl]heptanoic acid	3.75	level1			517.317	364.8	NEG	C30H46O7		103773-62-2		Terpenoids	Triterpenoids	Lanostane, Tirucallane and Euphane triterpenoids	RERVSJVGWKIGTJ-RQLZKMEDSA-N	0.00309721	0.00417204	0.00389013	0.00371979	0.0553972	0.0561073	0.0443485	0.051951	1.33622	0.00588923	0.0224413	13.9661	3.80386
981	Nevirapine	3.75	level1			265.108	278.1	NEG	C15H14N4O	HMDB0014383	129618-40-2	C07263	Alkaloids	Nicotinic acid alkaloids	Pyridine alkaloids	NQDJXKOVJZTUJA-UHFFFAOYSA-N	0.0289606	0.0471268	0.0294064	0.0351646	0.235076	0.232066	0.310287	0.259143	1.31932	0.00103939	0.00709749	7.36942	2.88155
982	ethyl 3,5-dihydroxybenzoate	3.75	level1			181.05	273.6	NEG	C9H10O4		4142-98-7		Shikimates and Phenylpropanoids	Phenolic acids (C6-C1)	Shikimic acids and derivatives	APHYVLPIZUVDTK-UHFFFAOYSA-N	0.0926429	0.102975	0.103018	0.0995453	0.114977	0.117726	0.116447	0.116383	1.22035	0.00894074	0.0301076	1.16915	0.22546
984	(2R,3S,4S,5R,6R)-2-(hydroxymethyl)-6-[[(2R,3S,4S,5R,6S)-3,4,5-trihydroxy-6-(3-hydroxy-5-methyl-phenoxy)tetrahydropyran-2-yl]methoxy]tetrahydropyran-3,4,5-triol	3.75	level1			447.151	225.7	NEG	C19H28O12		164991-86-0		Polyketides			XZPNBJLXZMBECP-SKYGPZSASA-N	0.432633	0.41564	0.435407	0.427893	0.646665	0.636849	0.620272	0.634595	1.33526	3.07762e-05	0.00102965	1.48307	0.568586
985	Cyclopropylacetic acid	3.75	level1			99.0451	211.9	NEG	C5H8O2		5239-82-7		Amino acids and Peptides	Small peptides	Aminoacids	KVVDRQDTODKIJD-UHFFFAOYSA-N	0.0830006	0.0434673	0.0504851	0.0589843	0.0988721	0.108204	0.0976296	0.101569	1.10901	0.027978	0.0694348	1.72196	0.784049
988	Pyridoxamine	3.75	level1			169.097	323.5	POS	C8H12N2O2	HMDB0001431	85-87-0	C00534	Alkaloids	Nicotinic acid alkaloids	Pyridine alkaloids	NHZMQXZHNVQTQA-UHFFFAOYSA-N	0.00281243	0.00262567	0.0062488	0.00389563	0.00860444	0.00761298	0.00666655	0.00762799	1.06309	0.04582	0.101004	1.95809	0.969445
990	PC(14:0/14:0)	3.75	level1			678.505	152.4	POS	C36H72NO8P	HMDB0007866	18194-24-6		Fatty acids	Glycerophospholipids	Glycerophosphocholines	CITHEXJVPOWHKC-UUWRZZSWSA-N	0.0084293	0.00680235	0.00969045	0.00830737	0.0158852	0.0225895	0.0311473	0.0232073	1.22805	0.0295225	0.072365	2.79359	1.48212
991	12-Hydroxystearic acid	3.75	level1			281.248	33.5	NEG	C18H36O3	HMDB0061706	106-14-9		Fatty acids	Octadecanoids	Other Octadecanoids	ULQISTXYYBZJSJ-UHFFFAOYSA-N	0.185965	0.211456	0.183224	0.193548	0.292543	0.284059	0.26286	0.279821	1.2849	0.00237977	0.0121479	1.44574	0.531811
992	1-Caffeoylquinic acid	3.74	level1			353.088	235.2	NEG	C16H18O9		1241-87-8		Shikimates and Phenylpropanoids	Phenylpropanoids (C6-C3)	Cinnamic acids and derivatives	GWTUHAXUUFROTF-DUXPYHPUSA-N	0.13038	0.132845	0.111517	0.124914	2.27082	2.04625	2.49753	2.27153	1.33945	0.00358904	0.015971	18.1847	4.18466
994	Propionic acid	3.74	level1			73.0295	56.4	NEG	C3H6O2	HMDB0000237	79-09-4	C00163	Fatty acids	Fatty Acids and Conjugates	Branched fatty acids	XBDQKXXYIPTUBI-UHFFFAOYSA-N	0.513799	0.587099	0.567809	0.556236	0.740077	0.706574	0.682038	0.709563	1.25371	0.00516821	0.0205138	1.27565	0.351234
995	Phenylpyruvic acid	3.74	level1			163.04	245.9	NEG	C9H8O3	HMDB0000205	156-06-9	C00166	Shikimates and Phenylpropanoids	Phenylpropanoids (C6-C3)	Cinnamic acids and derivatives	BTNMPGBKDVTSJY-UHFFFAOYSA-N	0.217585	0.230659	0.225849	0.224698	0.206844	0.19883	0.1993	0.201658	1.24809	0.00754329	0.0266514	0.897462	-0.156077
998	2-Phenyllactic acid	3.74	level1			165.055	284.9	NEG	C9H10O3	HMDB0142137	515-30-0		Shikimates and Phenylpropanoids			NWCHELUCVWSRRS-UHFFFAOYSA-N	0.235199	0.237817	0.24009	0.237702	0.447877	0.412462	0.388968	0.416436	1.32696	0.00870044	0.029506	1.75192	0.808939
999	Hesperetin 7-O-neohesperidoside	3.74	level1			591.165	279.9	NEG	C28H34O15		13241-33-3	C09806	Shikimates and Phenylpropanoids	Flavonoids	Flavanones	ARGKVCXINMKCAZ-UZRWAPQLSA-N	0.194603	0.219477	0.208025	0.207368	0.0262582	0.0241619	0.0238467	0.0247556	1.34028	0.00139444	0.008588	0.11938	-3.06637
1000	3,5-Dimethoxybenzoic acid	3.74	level1			181.05	273.6	NEG	C9H10O4		1132-21-4		Shikimates and Phenylpropanoids	Phenolic acids (C6-C1)	Simple phenolic acids	IWPZKOJSYQZABD-UHFFFAOYSA-N	0.0926429	0.102975	0.103018	0.0995453	0.114977	0.117726	0.116447	0.116383	1.22035	0.00894074	0.0301076	1.16915	0.22546
1005	(2R,3R,4S,5S,6R)-2-[(2E)-6-hydroxy-2,6-dimethyl-octa-2,7-dienoxy]-6-[[(2S,3R,4S,5S)-3,4,5-trihydroxytetrahydropyran-2-yl]oxymethyl]tetrahydropyran-3,4,5-triol	3.74	level1			445.208	273	NEG	C21H36O11				Terpenoids	Monoterpenoids	Acyclic monoterpenoids	MACZNRHYPPXPRL-ORGBDTRNSA-N	1.01915	1.19516	1.11007	1.10813	0.186063	0.189111	0.180698	0.185291	1.33954	0.00296265	0.0140571	0.16721	-2.58026
1006	1,7,7-trimethyl-5-[(2R,3R,4S,5S,6R)-3,4,5-trihydroxy-6-(hydroxymethyl)oxan-2-yl]oxybicyclo[2.2.1]heptan-2-one	3.74	level1			311.15	264.9	NEG	C16H26O7				Terpenoids	Monoterpenoids	Camphane monoterpenoids	YQIHQJXXKNXTBN-IOZQKGQLSA-N	0.100181	0.111063	0.0976433	0.102963	1.17692	1.15611	1.14207	1.15837	1.34079	6.89587e-08	0.000114043	11.2504	3.4919
1007	2-Hydroxymethyl benzoic acid	3.74	level1			151.038	256.2	NEG	C8H8O3	HMDB0032594	612-20-4	C10804	Shikimates and Phenylpropanoids	Phenolic acids (C6-C1)	Simple phenolic acids	MGMNPSAERQZUIM-UHFFFAOYSA-N	0.029149	0.0321411	0.029894	0.0303947	0.054459	0.05124	0.0529338	0.0528776	1.33136	6.43046e-05	0.00145324	1.7397	0.798839
1011	PC(P-34:0)	3.74	level1			728.585	575.5	POS	C42H84NO7P	HMDB0011208			Fatty acids	Glycerophospholipids	Glycerophosphocholines	ZGOGLUJRGBOVEK-IIKIFWEUSA-N	0.0302286	0.0272512	0.0281301	0.0285366	0.00679298	0.00676145	0.00882689	0.00746044	1.32894	4.64081e-05	0.00124362	0.261434	-1.93548
1012	pyridine-2-carboxamide	3.74	level1			123.055	61.1	POS	C6H6N2O		1452-77-3	C01950	Alkaloids	Nicotinic acid alkaloids	Pyridine alkaloids	IBBMAWULFFBRKK-UHFFFAOYSA-N	0.0382079	0.0391289	0.0385047	0.0386138	0.0299111	0.0307261	0.0262059	0.0289477	1.269	0.00241559	0.012267	0.749671	-0.41567
1013	Glycine	3.74	level1			74.0247	415.7	NEG	C2H5NO2	HMDB0000123	56-40-6	C00037	Amino acids and Peptides	Small peptides	Aminoacids	DHMQDGOQFOQNFH-UHFFFAOYSA-N	0.0567574	0.0581951	0.0559857	0.0569794	0.0683827	0.0658085	0.0606157	0.0649356	1.16249	0.0285389	0.0705093	1.13963	0.18857
1014	(2S,3R,4R,5R,6S)-2-[(2R,3S,4S,5R,6R)-4-hydroxy-6-[(4S,5'R,6R,7S,8R,9S,10R,13R,16S)-10-hydroxy-5'-(hydroxymethyl)-7,9,13-trimethylspiro[5-oxapentacyclo[10.8.0.02,9.04,8.013,18]icos-18-ene-6,2'-piperidine]-16-yl]oxy-2-(hydroxymethyl)-5-[(2S,3R,4R,5R,6S)-3,4,5-trihydroxy-6-methyloxan-2-yl]oxyoxan-3-yl]oxy-6-methyloxane-3,4,5-triol	3.74	level1			900.491	383.8	POS	C45H73NO17				Alkaloids	Pseudoalkaloids	Steroidal alkaloids	WKQPSCAWSPODQF-ZNSBWVGZSA-N	0.0233541	0.0239349	0.0269451	0.0247447	0.019201	0.0190492	0.0200536	0.0194346	1.24953	0.0100794	0.0327898	0.785405	-0.348492
1015	Pinoresinol Diglucoside	3.74	level1			681.237	277	NEG	C32H42O16		63902-38-5		Shikimates and Phenylpropanoids	Lignans	Furofuranoid lignans	ZJSJQWDXAYNLNS-FUPWJLLWSA-N	0.0150574	0.0151426	0.0165708	0.0155903	0.0136172	0.0127671	0.0135907	0.013325	1.21016	0.015974	0.0457454	0.854699	-0.226512
1016	Ganoderic acid A	3.74	level1			497.288	176.8	NEG	C30H44O7		81907-62-2		Terpenoids	Triterpenoids	Lanostane, Tirucallane and Euphane triterpenoids	DYOKDAQBNHPJFD-JNTBEZBXSA-N	0.149639	0.162656	0.15331	0.155202	0.111239	0.141078	0.116754	0.123024	1.12545	0.0318731	0.0766461	0.792668	-0.335211
1019	Magnolioside	3.73	level1			353.088	235.2	NEG	C16H18O9		121-34-6		Shikimates and Phenylpropanoids	Coumarins	Simple coumarins	WBAVLTNIRYDCPM-YMILTQATSA-N	0.13038	0.132845	0.111517	0.124914	2.27082	2.04625	2.49753	2.27153	1.33945	0.00358904	0.015971	18.1847	4.18466
1020	(10R,11R)-10,11-dihydroxy-9-(hydroxymethyl)-1,6a,6b,9,12a-pentamethyl-2-methylene-1,3,4,5,6,6a,7,8,8a,10,11,12,13,14b-tetradecahydropicene-4a-carboxylic acid	3.73	level1			485.327	463.8	NEG	C30H46O5				Terpenoids	Triterpenoids	Ursane and Taraxastane triterpenoids	FFMVHFPLIIYYNC-UBBVLHQISA-N	0.00284378	0.0017862	0.00277238	0.00246745	0.133224	0.113728	0.22824	0.158397	1.33094	0.0477872	0.104208	64.1947	6.00438
1022	N-Phenylacetamide	3.73	level1			136.075	251.1	POS	C8H9NO	HMDB0001250	55576-55-1	C07565	Alkaloids	Anthranilic acid alkaloids		FZERHIULMFGESH-UHFFFAOYSA-N	0.0252945	0.0286484	0.026977	0.0269733	0.0200732	0.0189317	0.0176671	0.0188907	1.2887	0.0024672	0.0124417	0.700347	-0.513857
1023	3-Methyl-1H-pyrazole-4-carbaldehyde	3.73	level1			109.041	69.2	NEG	C5H6N2O		112758-40-4		Alkaloids			NWDMGTFNIOCVDU-UHFFFAOYSA-N	0.233028	0.180978	0.224023	0.212676	0.649779	0.638348	0.524451	0.604192	1.31552	0.000815042	0.00606499	2.8409	1.50635
1031	17-(4,5-dihydroxy-1,5-dimethyl-hexyl)-7-hydroxy-4,4,10,13,14-pentamethyl-2,5,6,7,12,15,16,17-octahydro-1H-cyclopenta[a]phenanthrene-3,11-dione	3.73	level1			487.339	387.9	NEG	C30H48O5				Terpenoids	Triterpenoids	Lanostane, Tirucallane and Euphane triterpenoids	AGJPRCSTEKXDHG-UHFFFAOYSA-N	0.0207924	0.0236541	0.0192733	0.0212399	0.496725	0.526089	0.527685	0.516833	1.34052	0.000339533	0.0035529	24.3331	4.60485
1032	[3-[2,3-dihydroxypropoxy(hydroxy)phosphoryl]oxy-2-hydroxypropyl] 14-methylpentadecanoate	3.73	level1			483.272	551.1	NEG	C22H45O9P				Fatty acids	Glycerophospholipids	Glycerophosphoglycerols	VJBFQKCFAQJCQF-UHFFFAOYSA-N	0.312934	0.309978	0.37381	0.332241	0.241489	0.271272	0.232508	0.248423	1.18533	0.0246531	0.0630607	0.747721	-0.419429
1035	2-[(1S,2S,4aR,8aS)-1-hydroxy-4a-methyl-8-methylene-decalin-2-yl]prop-2-enoic acid	3.73	level1			233.153	406.3	POS	C15H22O3		58728-37-3		Terpenoids	Sesquiterpenoids	Eudesmane sesquiterpenoids	QTSQCCVLTMKKDP-SFDCQRBFSA-N	0.0323653	0.0144192	0.0165226	0.0211023	0.0580984	0.0617409	0.053357	0.0577321	1.21249	0.00401758	0.0172501	2.73581	1.45197
1037	4-Chromanone	3.73	level1			147.045	357.2	NEG	C9H8O2		491-37-2		Shikimates and Phenylpropanoids	Isoflavonoids		MSTDXOZUKAQDRL-UHFFFAOYSA-N	0.36182	0.335782	0.370658	0.356087	0.0350783	0.0337493	0.0288516	0.0325598	1.33944	6.96293e-06	0.000559411	0.0914377	-3.45107
1039	(1S,4aS,7S,7aR)-7-methyl-1-[(2S,3R,4S,5S,6R)-3,4,5-trihydroxy-6-(hydroxymethyl)tetrahydropyran-2-yl]oxy-1,4a,5,6,7,7a-hexahydrocyclopenta[c]pyran-4-carboxylic acid	3.73	level1			359.133	287.9	NEG	C16H24O9		22487-36-1	C11636	Terpenoids	Monoterpenoids	Iridoids monoterpenoids	DSXFHNSGLYXPNG-YDYVGBNJSA-N	0.379982	0.375835	0.369414	0.375077	0.682627	0.772228	0.843699	0.766185	1.3217	0.0135998	0.0406995	2.04274	1.0305
1040	(2R,3S,4S,5R,6S)-2-[(3,4,5-trihydroxytetrahydropyran-2-yl)oxymethyl]-6-(3,4,5-trimethoxyphenoxy)tetrahydropyran-3,4,5-triol	3.73	level1			477.161	244.9	NEG	C20H30O13							GGIDHIBVLYVTAU-QGPLIYBISA-N	0.26234	0.215742	0.258013	0.245365	0.48209	0.60811	0.56849	0.552897	1.3077	0.00154889	0.00918124	2.25336	1.17208
1041	14-methyl-7,9,20,22-tetraoxa-14-azapentacyclo[15.7.0.04,12.06,10.019,23]tetracosa-1(24),4,6(10),11,17,19(23)-hexaen-2-one	3.73	level1			354.137	224.8	POS	C20H19NO5		24240-05-9		Alkaloids	Tyrosine alkaloids	Protopine alkaloids	ZAALQOFZFANFTF-UHFFFAOYSA-N	0.0130761	0.0147284	0.0122169	0.0133405	0.0103376	0.00995409	0.00987453	0.0100554	1.24394	0.0119117	0.0369954	0.753753	-0.407837
1044	N-Acetylvaline	3.73	level1			158.082	160.6	NEG	C7H13NO3	HMDB0011757	96-81-1		Amino acids and Peptides	Small peptides	Dipeptides	IHYJTAOFMMMOPX-LURJTMIESA-N	0.29793	0.304722	0.246005	0.282886	0.507018	0.411553	0.43971	0.45276	1.24994	0.00739467	0.0262864	1.60051	0.678529
1045	PC(39:5)	3.73	level1			822.611	620.2	POS	C47H84NO8P							JKGGTQPSLLAHHY-UQWXQCBASA-N	0.00828313	0.00449271	0.00784255	0.0068728	0.0027101	0.00417087	0.00306443	0.00331514	1.12031	0.049308	0.106772	0.482356	-1.05183
1046	Atractyloside A	3.73	level1			429.212	308.2	NEG	C21H36O10		126054-77-1	C17858	Terpenoids	Sesquiterpenoids	Guaiane sesquiterpenoids	QNBLVYVBWDIWDM-BSLJOXIBSA-N	0.104095	0.10701	0.103345	0.104817	1.38942	1.50183	1.29378	1.39501	1.34078	0.00215801	0.0113912	13.3091	3.73434
1049	2-Aminonicotinic acid	3.73	level1			137.035	194.3	NEG	C6H6N2O2	HMDB0061680	5345-47-1		Amino acids and Peptides	Small peptides	Aminoacids	KPIVDNYJNOPGBE-UHFFFAOYSA-N	0.115284	0.0958228	0.0681486	0.0930851	0.240599	0.253191	0.241473	0.245088	1.28068	0.000439328	0.00414349	2.63294	1.39668
1051	Nordihydroguaiaretic acid	3.73	level1			301.147	26.6	NEG	C18H22O4		500-38-9	C10719	Shikimates and Phenylpropanoids	Lignans	Dibenzylbutane lignans	HCZKYJDFEPMADG-UHFFFAOYSA-N	0.0543069	0.0463123	0.0566723	0.0524305	0.768801	0.700399	0.697026	0.722075	1.33957	0.0010217	0.00702358	13.7721	3.78367
1052	Jaranol	3.73	level1			313.074	23.7	NEG	C17H14O6		3301-49-3		Shikimates and Phenylpropanoids	Flavonoids	Flavonols	BJBUTJQYZDYRMJ-UHFFFAOYSA-N	0.0149643	0.00503599	0.0131898	0.0110634	0.119842	0.0635792	0.0836574	0.0890262	1.26091	0.00961598	0.03172	8.04695	3.00844
1054	Orthosphenic acid	3.72	level1			487.342	76.6	NEG	C30H48O5		86632-20-4		Terpenoids	Triterpenoids	Friedelane triterpenoids	JPAXVSRGFJVPEU-GGQQGAMYSA-N	0.095256	0.126239	0.111251	0.110915	1.54615	1.5464	2.11449	1.73568	1.3353	0.0131683	0.0397561	15.6487	3.96797
1055	(E)-3-(2,5-dihydroxyphenyl)prop-2-enoic acid	3.72	level1			179.035	263.4	NEG	C9H8O4		38489-67-7|636-01-1		Shikimates and Phenylpropanoids	Phenylpropanoids (C6-C3)	Cinnamic acids and derivatives	JXIPYOZBOMUUCA-DAFODLJHSA-N	0.174486	0.155348	0.225252	0.185029	0.67666	0.634511	0.757209	0.68946	1.31933	0.000265382	0.0030839	3.72623	1.89772
1057	DL-m-Tyrosine	3.72	level1			182.081	74.5	POS	C9H11NO3		775-06-4		Amino acids and Peptides	Small peptides	Aminoacids	JZKXXXDKRQWDET-UHFFFAOYSA-N	0.135445	0.0965794	0.129586	0.120537	0.421354	0.40703	0.427272	0.418552	1.32223	2.49805e-05	0.000938736	3.4724	1.79593
1058	1-(4-hydroxy-3,5-dimethoxy-phenyl)propan-1-one	3.72	level1			209.082	269.3	NEG	C11H14O4		5650-43-1					CXCPJZXJNRBTGF-UHFFFAOYSA-N	0.0421398	0.0334575	0.0370655	0.0375543	0.0491064	0.0575091	0.0638146	0.05681	1.20443	0.0176763	0.0492869	1.51274	0.597168
1059	(2R,3R,4S,5S,6R)-2-benzyloxy-6-[[(2S,3R,4S,5R)-3,4,5-trihydroxytetrahydropyran-2-yl]oxymethyl]tetrahydropyran-3,4,5-triol	3.72	level1			401.144	233.6	NEG	C18H26O10		130622-31-0					WOGBNISMMIOPAZ-NWQIESHVSA-N	0.163066	0.149713	0.160993	0.157924	0.256682	0.236847	0.247248	0.246926	1.32477	0.000229546	0.00283138	1.56357	0.644846
1062	1-(2-hydroxy-5-methoxy-phenyl)ethanone	3.72	level1			165.055	284.9	NEG	C9H10O3		705-15-7		Shikimates and Phenylpropanoids			MLIBGOFSXXWRIY-UHFFFAOYSA-N	0.235199	0.237817	0.24009	0.237702	0.447877	0.412462	0.388968	0.416436	1.32696	0.00870044	0.029506	1.75192	0.808939
1063	(4-hydroxyphenyl) acetate	3.72	level1			151.038	256.2	NEG	C8H8O3		3233-32-7	C13636	Shikimates and Phenylpropanoids	Phenolic acids (C6-C1)	Simple phenolic acids	HBMCQTHGYMTCOF-UHFFFAOYSA-N	0.029149	0.0321411	0.029894	0.0303947	0.054459	0.05124	0.0529338	0.0528776	1.33136	6.43046e-05	0.00145324	1.7397	0.798839
1064	PC(35:3)	3.72	level1			770.566	640.1	POS	C43H80NO8P	HMDB0007947			Fatty acids	Glycerophospholipids	Glycerophosphocholines	HPSXRQYORYXLNT-WPCOGVEASA-N	0.205449	0.190367	0.19121	0.195675	0.712784	0.551031	0.58708	0.616965	1.32789	0.0126216	0.038569	3.153	1.65673
1065	Pregnanediol 3-O-glucuronide	3.72	level1			495.297	350.6	NEG	C27H44O8	HMDB0010318	1852-49-9	C03033	Terpenoids	Steroids	Pregnane steroids	ZFFFJLDTCLJDHL-JQYCEVDMSA-N	0.0349119	0.0390956	0.0377181	0.0372419	0.179987	0.206148	0.208808	0.198314	1.33837	0.00282094	0.0136083	5.32503	2.41279
1067	2-(1,5,8-trihydroxy-4a,8-dimethyl-1,2,3,4,5,6,7,8a-octahydronaphthalen-2-yl)prop-2-enoic acid	3.72	level1			283.155	279	NEG	C15H24O5				Terpenoids	Sesquiterpenoids	Eudesmane sesquiterpenoids	VSZGUTBXIPJUAN-UHFFFAOYSA-N	0.664909	0.79768	0.77399	0.745526	0.113585	0.224463	0.11522	0.15109	1.2908	0.000413765	0.003991	0.202662	-2.30285
1068	Flavin adenine dinucleotide (FAD)	3.72	level1			784.15	234.5	NEG	C27H33N9O15P2	HMDB0001248	146-14-5	C00016	Alkaloids	Pseudoalkaloids	pteridine alkaloids	VWWQXMAJTJZDQX-UYBVJOGSSA-N	0.0316914	0.0294436	0.0362864	0.0324738	0.0402794	0.0433536	0.0424558	0.0420296	1.20095	0.0124261	0.0381271	1.29426	0.372129
1070	3-Hydroxyisobutyric acid	3.72	level1			103.04	161.6	NEG	C4H8O3	HMDB0000023	2068-83-9	C06001	Fatty acids	Fatty Acids and Conjugates	Hydroxy fatty acids	DBXBTMSZEOQQDU-VKHMYHEASA-N	0.146007	0.0765708	0.153469	0.125349	0.188246	0.215776	0.213726	0.205916	1.02461	0.0364171	0.0848533	1.64274	0.716104
1071	9-[3,4-dihydroxy-5-(methylsulfanylmethyl)tetrahydrofuran-2-yl]-1H-purin-6-one	3.72	level1			297.066	130.8	NEG	C11H14N4O4S		17298-58-7		Carbohydrates	Nucleosides	Purine nucleos(t)ides	GXYLOXCSJFJFKA-UHFFFAOYSA-N	0.0782048	0.100499	0.0939899	0.0908978	0.278281	0.283148	0.265618	0.275682	1.32883	2.56611e-05	0.00094966	3.03288	1.60069
1072	(3S,3'R,3'aS,4aS,6'S,6aS,6bS,7'aR,9R,11R,11aS,11bR)-3,11-dihydroxy-3',6',10,11b-tetramethyl-spiro[1,2,3,4,4a,6,6a,6b,7,8,11,11a-dodecahydrobenzo[a]fluorene-9,2'-3a,4,5,6,7,7a-hexahydro-3H-furo[3,2-b]pyridine]-5-one	3.72	level1			444.31	123.9	POS	C27H41NO4		143502-51-6		Alkaloids	Pseudoalkaloids	Steroidal alkaloids	NURPXYQPDMVKOY-RUKZUWONSA-N	0.0783508	0.0475495	0.057153	0.0610178	0.351392	0.405085	0.452004	0.402827	1.32226	0.000359027	0.00367547	6.6018	2.72286
1073	3,4-Diaminoanisole	3.72	level1			139.086	57.2	POS	C7H10N2O		102-51-2		Amino acids and Peptides	Small peptides	Aminoacids	AGAHETWGCFCMDK-UHFFFAOYSA-N	0.00451347	0.00526582	0.00770821	0.00582917	0.0211519	0.0235137	0.021891	0.0221856	1.30497	0.000162406	0.00236342	3.80595	1.92826
1076	2-[(2-amino-3-methyl-butanoyl)amino]-3-phenyl-propanoic acid	3.71	level1			263.14	225.2	NEG	C14H20N2O3		75946-40-6		Amino acids and Peptides	Small peptides	Dipeptides	GJNDXQBALKCYSZ-UHFFFAOYSA-N	0.44703	0.477788	0.435953	0.45359	0.688388	0.642419	0.737998	0.689602	1.30665	0.00146577	0.00886284	1.52032	0.604374
1077	3-Methoxyphenylacetic acid	3.71	level1			165.056	272.4	NEG	C9H10O3	HMDB0059969	1798-09-0		Shikimates and Phenylpropanoids	Phenolic acids (C6-C1)	Simple phenolic acids	LEGPZHPSIPPYIO-UHFFFAOYSA-N	0.167214	0.198754	0.19037	0.185446	0.0422861	0.047271	0.0358977	0.0418183	1.33055	0.000135988	0.00214605	0.225501	-2.14879
1081	(1S,4aS,7R,7aR)-7-methyl-1-[(2S,3R,4S,5S,6R)-3,4,5-trihydroxy-6-(hydroxymethyl)tetrahydropyran-2-yl]oxy-1,4a,5,6,7,7a-hexahydrocyclopenta[c]pyran-4-carboxylic acid	3.71	level1			359.133	287.9	NEG	C16H24O9		88668-99-9	C11649	Terpenoids	Monoterpenoids	Iridoids monoterpenoids	DSXFHNSGLYXPNG-PKUPRILXSA-N	0.379982	0.375835	0.369414	0.375077	0.682627	0.772228	0.843699	0.766185	1.3217	0.0135998	0.0406995	2.04274	1.0305
1082	2-Methylbutyrylglycine	3.71	level1			158.082	160.6	NEG	C7H13NO3	HMDB0000339	52320-67-9		Amino acids and Peptides	Small peptides	Dipeptides	HOACIBQKYRHBOW-UHFFFAOYSA-N	0.29793	0.304722	0.246005	0.282886	0.507018	0.411553	0.43971	0.45276	1.24994	0.00739467	0.0262864	1.60051	0.678529
1084	LPC(18:1)	3.71	level1			522.354	532.8	POS	C26H52NO7P	HMDB0002815	19420-56-5	C03916	Fatty acids	Glycerophospholipids	Glycerophosphocholines	YAMUFBLWGFFICM-PTGWMXDISA-N	0.0131805	0.0115293	0.0157623	0.0134907	0.0296977	0.0269915	0.0280315	0.0282402	1.29987	0.000543636	0.00472744	2.09331	1.06578
1087	Ala-Gly	3.71	level1			145.062	91.3	NEG	C5H10N2O3	HMDB0006899	687-69-4		Amino acids and Peptides	Small peptides	Aminoacids	CXISPYVYMQWFLE-VKHMYHEASA-N	0.0608487	0.0738661	0.090739	0.0751513	0.1136	0.241608	0.227863	0.194357	1.15607	0.0453108	0.100145	2.58621	1.37084
1089	N6,N6,N6-Trimethyllysine	3.71	level1			189.159	567.9	POS	C9H20N2O2	HMDB0001325	19253-88-4	C03793	Amino acids and Peptides	Small peptides	Aminoacids	MXNRLFUSFKVQSK-QMMMGPOBSA-N	1.85894	1.54514	1.41889	1.60766	4.87396	4.53604	4.32102	4.57701	1.32348	0.000138257	0.0021644	2.847	1.50944
1091	Glucosamine 1-phosphate	3.71	level1			258.038	435.8	NEG	C6H14NO8P	HMDB0001109	2152-75-2	C06156	Carbohydrates	Aminosugars and aminoglycosides	Aminosugars	YMJBYRVFGYXULK-QZABAPFNSA-N	0.0160207	0.0177196	0.0159454	0.0165619	0.0355415	0.0340591	0.0325222	0.0340409	1.33214	7.5311e-05	0.00158322	2.05538	1.0394
1092	Glucose	3.71	level1			203.052	275.5	POS	C6H12O6	HMDB0003345	492-62-6	C00267	Carbohydrates	Saccharides	Monosaccharides	WQZGKKKJIJFFOK-DVKNGEFBSA-N	0.0136977	0.0134521	0.0147332	0.013961	0.0161078	0.0154439	0.0148825	0.0154781	1.10041	0.0454909	0.100454	1.10867	0.148824
1093	PC(18:1)	3.71	level1			518.323	214.1	POS	C26H50NO8P		56391-91-4					GWVZWQQVJIDOHB-KMAVEXBHSA-N	0.088821	0.0871795	0.0909331	0.0889778	0.363476	0.372944	0.436481	0.390967	1.33728	0.00562539	0.0217378	4.39398	2.13553
1094	(3S,3'R,3'aS,6'S,6aS,6bS,7'aR,9R,11aS,11bR)-3',6',10,11b-tetramethyl-3-[(2R,3R,4S,5S,6R)-3,4,5-trihydroxy-6-(hydroxymethyl)tetrahydropyran-2-yl]oxy-spiro[1,2,3,4,6,6a,6b,7,8,11a-decahydrobenzo[a]fluorene-9,2'-3a,4,5,6,7,7a-hexahydro-3H-furo[3,2-b]pyridine]-11-one	3.71	level1			588.351	211.5	POS	C33H49NO8		36069-05-3		Alkaloids	Pseudoalkaloids	Steroidal alkaloids	HYDDDNUKNMMWBD-VPLHBGEQSA-N	0.0589829	0.0612454	0.0644143	0.0615475	0.0311086	0.0307034	0.0288001	0.030204	1.33513	5.43807e-05	0.00134302	0.490743	-1.02696
1095	2,6-dihydroxy-7-methoxy-1,1,4a-trimethyl-3,4,10,10a-tetrahydro-2H-phenanthren-9-one	3.71	level1			303.16	70	NEG	C18H24O4				Terpenoids	Diterpenoids	Podocarpane diterpenoids	JKTSDLANZJEZMK-UHFFFAOYSA-N	0.0356573	0.0379592	0.0297748	0.0344638	0.0491469	0.0651834	0.0796788	0.0646697	1.19396	0.0298802	0.0730362	1.87646	0.90801
1096	Peimisine	3.71	level1			428.315	42.2	POS	C27H41NO3		19773-24-1|139893-27-9		Alkaloids	Pseudoalkaloids	Steroidal alkaloids	KYELXPJVGNZIGC-GKFGJCLESA-N	0.11147	0.0901647	0.0997571	0.100464	0.622359	0.70896	0.645323	0.65888	1.33761	3.05428e-05	0.00102617	6.55838	2.71334
1098	2',4',6'-Trihydroxyacetophenone	3.7	level1			167.035	257.7	NEG	C8H8O4	HMDB0029644	480-66-0	C21895	Polyketides	Phloroglucinols	Acyl phloroglucinols	XLEYFDVVXLMULC-UHFFFAOYSA-N	2.25461	2.31926	2.34928	2.30772	2.77704	2.63234	2.59233	2.66723	1.27196	0.0045748	0.0188512	1.15579	0.208878
1099	Hesperidin	3.7	level1			591.165	279.9	NEG	C28H34O15		520-26-3	C09755|D01038	Shikimates and Phenylpropanoids	Flavonoids	Flavanones	QUQPHWDTPGMPEX-QJBIFVCTSA-N	0.194603	0.219477	0.208025	0.207368	0.0262582	0.0241619	0.0238467	0.0247556	1.34028	0.00139444	0.008588	0.11938	-3.06637
1101	Denticetic-acid	3.7	level1			197.154	489.4	NEG	C12H22O2	HMDB0000529	2430-94-6		Fatty acids	Fatty Acids and Conjugates	Unsaturated fatty acids	IJBFSOLHRKELLR-FPLPWBNLSA-N	0.0118289	0.0132432	0.0114951	0.0121891	0.0207136	0.0204565	0.0185739	0.0199146	1.30903	0.000855103	0.00625931	1.63381	0.708243
1102	(2E,4E)-1-(2,4-dihydroxy-3,5-dimethyl-phenyl)hexa-2,4-dien-1-one	3.7	level1			231.102	398.6	NEG	C14H16O3		79950-85-9		Polyketides	Aromatic polyketides	Sorbicilinoids	RKKPUBAAIGFXOG-YTXTXJHMSA-N	0.0121653	0.015523	0.0136365	0.0137749	0.193484	0.195999	0.184143	0.191209	1.3395	1.17494e-06	0.000301021	13.8809	3.79503
1108	Bauhiniaside B	3.7	level1			435.164	292.6	POS	C22H26O9		69261-84-3		Shikimates and Phenylpropanoids	Flavonoids	Chalcones	LVORRJFRGNQTJB-QMCAAQAGSA-N	0.0404904	0.0427527	0.0437076	0.0423169	0.0106754	0.0137187	0.012589	0.0123277	1.33103	2.1144e-05	0.000872083	0.291319	-1.77933
1109	Corydaldine (tautomeric structure 1)	3.7	level1			208.096	274.1	POS	C11H13NO3		493-49-2		Alkaloids	Pseudoalkaloids	Isoindole alkaloids	MQKFSXLBPPCAGR-UHFFFAOYSA-N	0.021857	0.0220883	0.0215033	0.0218162	0.0154579	0.0154674	0.0131854	0.0147036	1.29488	0.000794089	0.00597891	0.673975	-0.569232
1110	Marimastat	3.7	level1			332.217	264.1	POS	C15H29N3O5	HMDB0014924	154039-60-8	D03795	Amino acids and Peptides	Small peptides	Dipeptides	OCSMOTCMPXTDND-OUAUKWLOSA-N	0.137359	0.129309	0.0735792	0.113416	0.184538	0.173977	0.159499	0.172671	1.00111	0.0498937	0.107726	1.52246	0.606409
1111	(2S)-2-amino-4-benzyloxy-4-oxo-butanoic acid	3.7	level1			206.081	257.1	POS	C11H13NO4		2177-63-1		Amino acids and Peptides	Small peptides	Aminoacids	VGALFAWDSNRXJK-VIFPVBQESA-N	0.0858705	0.085953	0.08511	0.0856445	0.0666184	0.0652757	0.0622377	0.0647106	1.32755	9.32964e-05	0.00176064	0.755572	-0.404359
1112	Beiwutine	3.7	level1			648.3	252.1	POS	C33H45NO12		76918-93-9	C08663	Alkaloids	Pseudoalkaloids	Terpenoid alkaloids	GPTAWZLFSGYZGC-JDMPSTDXSA-N	0.0136143	0.0123202	0.0140645	0.013333	0.0414741	0.0382736	0.0450572	0.0416016	1.3335	0.000153576	0.00229025	3.12019	1.64164
1114	N-Acetylglucosamine 6-Phosphate	3.7	level1			282.039	87.8	NEG	C8H16NO9P	HMDB0001062	18191-20-3	C00357	Carbohydrates	Aminosugars and aminoglycosides	Aminosugars	BRGMHAYQAZFZDJ-RTRLPJTCSA-N	0.0444855	0.0456884	0.0420638	0.0440792	0.0549842	0.0532066	0.0530224	0.0537377	1.29467	0.00144681	0.00879212	1.21912	0.285836
1115	Homocitric acid	3.7	level1			205.035	474.8	NEG	C7H10O7	HMDB0003518	13052-73-8	C01251	Fatty acids	Fatty Acids and Conjugates	Dicarboxylic acids	XKJVEVRQMLKSMO-UHFFFAOYSA-N	0.0282565	0.0219671	0.0277407	0.0259881	0.0884014	0.0751984	0.0676156	0.0770718	1.31349	0.00133452	0.00834952	2.96566	1.56835
1116	3-Methylglutarylcarnitine	3.7	level1			290.159	427.8	POS	C13H23NO6	HMDB0000552	102673-95-0		Fatty acids	Fatty esters	Fatty acyl carnitines	HFCPFJNSBPQJDP-UHFFFAOYSA-N	0.294977	0.249051	0.281145	0.275058	0.699385	0.669161	0.629211	0.665919	1.32968	8.95895e-05	0.00172568	2.42101	1.27561
1117	Pehanorm	3.7	level1			122.081	274.9	POS	C4H11NO3	HMDB0240288	77-86-1	C07182				LENZDBCJOHFCAS-UHFFFAOYSA-N	0.0742682	0.0562789	0.0753283	0.0686251	0.020897	0.0475619	0.0441211	0.0375267	1.02149	0.0404189	0.0918111	0.546836	-0.87082
1118	4-methoxy-6-[(E)-prop-1-enyl]pyran-2-one	3.69	level1			167.07	284.8	POS	C9H10O3				Polyketides	Cyclic polyketides	2-pyrone derivatives	NWPQSEVAIPWZJY-ONEGZZNKSA-N	0.0667486	0.0590568	0.0628352	0.0628802	0.128799	0.119009	0.115458	0.121089	1.32715	0.000218037	0.00277804	1.92571	0.945389
1119	2-Hydroxy-4-methoxybenzoic acid	3.69	level1			167.035	257.7	NEG	C8H8O4		2237-36-7		Shikimates and Phenylpropanoids	Phenolic acids (C6-C1)	Simple phenolic acids	MRIXVKKOHPQOFK-UHFFFAOYSA-N	2.25461	2.31926	2.34928	2.30772	2.77704	2.63234	2.59233	2.66723	1.27196	0.0045748	0.0188512	1.15579	0.208878
1121	N6-Acetyllysine	3.69	level1			187.109	96.5	NEG	C8H16N2O3	HMDB0000206	692-04-6	C02727	Amino acids and Peptides	Small peptides	Aminoacids	DTERQYGMUDWYAZ-ZETCQYMHSA-N	0.139091	0.149232	0.147068	0.14513	0.192695	0.197243	0.184525	0.191487	1.31327	0.000660073	0.00532706	1.31942	0.3999
1122	(2R,3S,4S,5R,6R)-2-(hydroxymethyl)-6-(1-vinylhexoxy)tetrahydropyran-3,4,5-triol	3.69	level1			271.155	363.5	NEG	C14H26O6				Fatty acids	Fatty acyl glycosides	Fatty acyl glycosides of mono- and disaccharides	MPSRBJBPHXIOFN-MXNNCRBYSA-N	0.0302976	0.0364924	0.0339288	0.0335729	0.0667888	0.0671261	0.0693708	0.0677619	1.32527	6.48778e-05	0.00145849	2.01835	1.01318
1123	(1S,4aR,6aS,6bR,10R,11R,12aR)-1,10,11-trihydroxy-9,9-bis(hydroxymethyl)-2,2,6a,6b,12a-pentamethyl-1,3,4,5,6,6a,7,8,8a,10,11,12,13,14b-tetradecahydropicene-4a-carboxylic acid	3.69	level1			519.332	334.3	NEG	C30H48O7		109742-48-5		Terpenoids	Triterpenoids	Oleanane triterpenoids	AMUBZPULDIMIKH-UGBSTRDVSA-N	0.00097691	0.00059307	0.00155782	0.0010426	0.0216878	0.0204115	0.0253234	0.0224742	1.31959	0.000138637	0.00216755	21.556	4.43002
1124	2-[[3,4-dihydroxy-5-(hydroxymethyl)tetrahydrofuran-2-yl]oxymethyl]-6-[1-methyl-1-(4-methylcyclohex-3-en-1-yl)ethoxy]tetrahydropyran-3,4,5-triol	3.69	level1			429.213	297.1	NEG	C21H36O10				Terpenoids	Monoterpenoids		VQNYZNUWUDHTKB-UHFFFAOYSA-N	0.53097	0.632209	0.578861	0.58068	0.492085	0.461105	0.492288	0.481826	1.15326	0.0333209	0.0792937	0.829761	-0.269232
1125	(2R,3S,4S,5R,6S)-2-(hydroxymethyl)-6-[4-[(E)-3-hydroxyprop-1-enyl]phenoxy]tetrahydropyran-3,4,5-triol	3.69	level1			311.114	265	NEG	C15H20O7		120442-73-1	C05855	Shikimates and Phenylpropanoids	Phenylpropanoids (C6-C3)	Cinnamic acids and derivatives	CRVXJSNSTGEXDX-HHMSBIESSA-N	0.0575743	0.0990864	0.0977217	0.0847942	0.168887	0.157956	0.153957	0.160267	1.17869	0.00622304	0.0233199	1.89007	0.918438
1126	Syringin	3.69	level1			371.134	264.2	NEG	C17H24O9	HMDB0242525	118-34-3	C01533	Terpenoids	Monoterpenoids	Menthane monoterpenoids	QJVXKWHHAMZTBY-GCPOEHJPSA-N	0.0720639	0.0731761	0.0736403	0.0729601	0.230737	0.298989	0.212754	0.247493	1.32288	0.0218779	0.0576974	3.39217	1.76221
1127	(E)-3-[4-methoxy-2-[(2S,3R,4S,5S,6R)-3,4,5-trihydroxy-6-(hydroxymethyl)tetrahydropyran-2-yl]oxy-phenyl]prop-2-enoic acid	3.69	level1			355.103	228.5	NEG	C16H20O9		31564-49-5		Shikimates and Phenylpropanoids	Phenylpropanoids (C6-C3)	Cinnamic acids and derivatives	FQWZGEBZILOCET-BJGSYIFTSA-N	0.0606937	0.0678569	0.0659619	0.0648375	0.078527	0.0975391	0.0774141	0.0844934	1.13623	0.0459423	0.101188	1.30316	0.382009
1129	Methionine sulfoxide	3.69	level1			166.053	421.8	POS	C5H11NO3S	HMDB0002005	62697-73-8	C02989	Amino acids and Peptides	Small peptides	Aminoacids	QEFRNWWLZKMPFJ-UHFFFAOYSA-N	0.0652663	0.0434591	0.0663682	0.0583646	0.103683	0.101574	0.0990193	0.101425	1.20553	0.00474013	0.0193217	1.73779	0.797253
1136	1-(2,4-dihydroxyphenyl)-2-(3,5-dimethoxyphenyl)propan-1-one	3.69	level1			301.111	29.4	NEG	C17H18O5				Polyketides			TURHNAJJDDIVGC-UHFFFAOYSA-N	0.0591247	0.0107538	0.0110366	0.0269717	2.02648	1.82693	1.97407	1.94249	1.30309	6.4782e-06	0.000546346	72.0197	6.17032
1137	(4aR,6aS,9aR)-1,8,8-trimethyl-2-oxo-1,4,4a,6a,7,9-hexahydropentaleno[1,6a-c]pyran-5-carboxylic acid	3.68	level1			263.128	101	NEG	C15H20O4		138458-84-1		Terpenoids	Sesquiterpenoids	Pentalenane sesquiterpenoids	MRLXXQBBRNRWDA-DBLSXQDMSA-N	0.336937	0.336183	0.346635	0.339918	0.388057	0.381745	0.369783	0.379861	1.28086	0.00322119	0.0148522	1.11751	0.160286
1138	3-Hydroxy-4-methoxyacetophenone	3.68	level1			167.07	284.8	POS	C9H10O3		6100-74-9		Shikimates and Phenylpropanoids			YLTGFGDODHXMFB-UHFFFAOYSA-N	0.0667486	0.0590568	0.0628352	0.0628802	0.128799	0.119009	0.115458	0.121089	1.32715	0.000218037	0.00277804	1.92571	0.945389
1139	o-Tyrosine	3.68	level1			182.081	74.5	POS	C9H11NO3	HMDB0006050	2370-61-8		Amino acids and Peptides	Small peptides	Aminoacids	WRFPVMFCRNYQNR-UHFFFAOYSA-N	0.135445	0.0965794	0.129586	0.120537	0.421354	0.40703	0.427272	0.418552	1.32223	2.49805e-05	0.000938736	3.4724	1.79593
1140	3,4-Dihydroxyhydrocinnamic acid	3.68	level1			181.05	273.6	NEG	C9H10O4	HMDB0000423	1078-61-1	C10447	Shikimates and Phenylpropanoids			DZAUWHJDUNRCTF-UHFFFAOYSA-N	0.0926429	0.102975	0.103018	0.0995453	0.114977	0.117726	0.116447	0.116383	1.22035	0.00894074	0.0301076	1.16915	0.22546
1141	LPC(O-18:1)	3.68	level1			490.372	512.1	POS	C26H54NO6P				Fatty acids	Glycerophospholipids	Glycerophosphocholines	HEEMBWYZIJABCR-ZXAYODBVSA-N	0.000967984	0.000780642	0.00110251	0.00095038	2.40351e-06	2.44445e-06	0.000113802	3.95501e-05	1.17566	0.000819804	0.00608461	0.041615	-4.58675
1143	[2-[5,7-Dihydroxy-2-(2-methylpropyl)-4-oxochromen-8-yl]-4,5-dihydroxy-6-(hydroxymethyl)oxan-3-yl] 4-(2-hydroxypropan-2-yl)cyclohexene-1-carboxylate	3.68	level1			545.24	315.1	POS	C29H38O11				Polyketides	Chromanes	Chromones	RCOKBEQNXSUVDZ-UHFFFAOYSA-N	0.175878	0.205532	0.176508	0.185972	0.225156	0.235341	0.248164	0.23622	1.20707	0.0131899	0.0398077	1.27019	0.345043
1144	Veratrosine	3.68	level1			572.357	296.6	POS	C33H49NO7		475-00-3		Alkaloids	Pseudoalkaloids	Steroidal alkaloids	WXQHVBNTINGJJR-NIFRNHPISA-N	0.0326235	0.0315712	0.0312798	0.0318248	0.0917818	0.0787031	0.0778167	0.0827672	1.33259	0.00738436	0.0262645	2.60071	1.37891
1148	Mannose	3.68	level1			179.056	5.1	NEG	C6H12O6	HMDB0000169	3458-28-4	C00159	Carbohydrates	Saccharides	Monosaccharides	WQZGKKKJIJFFOK-QTVWNMPRSA-N	0.148511	0.134544	0.15058	0.144545	0.186856	0.217217	0.274672	0.226248	1.18113	0.0357332	0.0836332	1.56524	0.646387
1149	Arecaidine	3.68	level1			142.086	403.8	POS	C7H11NO2	HMDB0030352	499-04-7	C10128	Alkaloids			DNJFTXKSFAMXQF-UHFFFAOYSA-N	0.077174	0.0711529	0.0727071	0.073678	0.234751	0.229671	0.230315	0.231579	1.34018	3.24968e-07	0.000184808	3.14312	1.6522
1151	(2R,3S,4S,5R,6S)-5-[(2S,3R,4R)-3,4-dihydroxy-4-(hydroxymethyl)tetrahydrofuran-2-yl]oxy-6-[4-[(3R,6S)-3-(4-hydroxy-3,5-dimethoxy-phenyl)-1,3,3a,4,6,6a-hexahydrofuro[3,4-c]furan-6-yl]-2,6-dimethoxy-phenoxy]-2-(hydroxymethyl)tetrahydropyran-3,4-diol	3.68	level1			711.249	239.5	NEG	C33H44O17				Shikimates and Phenylpropanoids	Lignans	Furofuranoid lignans	BUBVKRMIMSPLND-YTDPHAJHSA-N	0.00361286	0.00366996	0.00328696	0.00352326	0.00295582	0.00221332	0.00217166	0.00244693	1.16859	0.0186729	0.0513177	0.694508	-0.525936
1152	Dihydrouracil	3.68	level1			115.05	112.6	POS	C4H6N2O2	HMDB0000076	504-07-4	C00429	Alkaloids	Lysine alkaloids		OIVLITBTBDPEFK-UHFFFAOYSA-N	0.00967887	0.0110668	0.0105618	0.0104358	0.000445515	0.000488366	0.00117167	0.000701849	1.30971	3.18052e-05	0.00104452	0.0672538	-3.89424
1153	7-(3,4-dihydroxyphenyl)-1-(4-hydroxyphenyl)-5-[(2S,3R,4S,5R)-3,4,5-trihydroxytetrahydropyran-2-yl]oxy-heptan-3-one	3.68	level1			463.193	60.5	POS	C24H30O9				Shikimates and Phenylpropanoids	Diarylheptanoids	Linear diarylheptanoids	KQQLSXWIDDTWRR-WUOZLOAJSA-N	0.0119944	0.0100597	0.0103337	0.0107959	0.00683946	0.00849115	0.00840356	0.00791139	1.16461	0.0233975	0.0606119	0.732814	-0.448482
1154	(2R)-2-phenyl-2-[(2S,3R,4S,5S,6R)-3,4,5-trihydroxy-6-(hydroxymethyl)tetrahydropyran-2-yl]oxy-acetic acid	3.67	level1			313.093	209.6	NEG	C14H18O8				Shikimates and Phenylpropanoids	Phenylpropanoids (C6-C3)	Cinnamic acids and derivatives	PRBPGFIPERGSFI-SGYGPSCOSA-N	0.159306	0.157577	0.162127	0.15967	0.274181	0.274809	0.258541	0.269177	1.33694	3.71084e-05	0.00112163	1.68583	0.75346
1156	(4aR,5S,8aS,9aR)-9a-hydroxy-3,4a,5-trimethyl-5,6,7,8,8a,9-hexahydro-4H-benzo[f]benzofuran-2-one	3.67	level1			233.153	406.3	POS	C15H22O3				Terpenoids	Sesquiterpenoids	Eremophilane sesquiterpenoids	QKYLNUXCPSRUNA-YZENIEGJSA-N	0.0323653	0.0144192	0.0165226	0.0211023	0.0580984	0.0617409	0.053357	0.0577321	1.21249	0.00401758	0.0172501	2.73581	1.45197
1158	(3R,4R)-4,5-dihydroxy-3-methoxy-4-(4-methoxyphenyl)-6-[(E)-2-(2,5,5-trimethyltetrahydropyran-2-yl)vinyl]-1,3-dihydroquinolin-2-one	3.67	level1			466.223	393.3	NEG	C27H33NO6		180045-91-4		Alkaloids	Tryptophan alkaloids	Quinoline alkaloids	CVWJKBJRSZXDIW-IUEPNFFLSA-N	0.0278069	0.0317358	0.0204698	0.0266708	0.0107525	0.0102978	0.0124286	0.0111596	1.27364	0.00995297	0.0324994	0.418421	-1.25697
1159	(2S)-5,7-dimethoxy-2-(4-methoxyphenyl)chroman-4-one	3.67	level1			313.111	365.6	NEG	C18H18O5		38302-15-7		Shikimates and Phenylpropanoids	Flavonoids	Flavanones	MQFSCAHSIUPLSB-HNNXBMFYSA-N	0.0468809	0.0418032	0.0424705	0.0437182	0.0943592	0.0905391	0.0873128	0.090737	1.33257	5.37744e-05	0.00133678	2.0755	1.05346
1160	(1S,3R,4R,5R)-1,3-bis[[(E)-3-(3,4-dihydroxyphenyl)prop-2-enoyl]oxy]-4,5-dihydroxy-cyclohexanecarboxylic acid	3.67	level1			499.125	230.7	POS	C25H24O12		19870-46-3		Shikimates and Phenylpropanoids	Phenylpropanoids (C6-C3)	Cinnamic acids and derivatives	YDDUMTOHNYZQPO-PSEXTPKNSA-N	0.0112777	0.0122725	0.0138855	0.0124786	0.0275442	0.0287584	0.0256186	0.027307	1.3212	0.00023747	0.002889	2.18832	1.12982
1163	3-[2-methoxy-3-[(2S,3R,4S,5S,6R)-3,4,5-trihydroxy-6-(hydroxymethyl)tetrahydropyran-2-yl]oxy-phenyl]propanoic acid	3.66	level1			357.118	307.1	NEG	C16H22O9				Shikimates and Phenylpropanoids			VLHQGQCFFBCKMV-RSQMQNDGSA-N	0.00779775	0.00473661	0.00814649	0.00689362	0.0125125	0.0135684	0.0111143	0.0123984	1.15061	0.0131685	0.0397561	1.79853	0.846819
1164	Dihydrotachysterol	3.66	level1			399.361	631.3	POS	C28H46O	HMDB0015203	67-96-9	C06957	Terpenoids	Steroids	Vitamin D2 and derivatives	ILYCWAKSDCYMBB-OPCMSESCSA-N	0.285456	0.280727	0.292636	0.286273	0.710236	0.844283	0.933441	0.82932	1.32626	0.0137729	0.0410633	2.89696	1.53454
1168	2,6-dihydroxy-4-(2-hydroxy-1-methyl-propyl)-3-methyl-benzoic acid	3.66	level1			239.092	266.9	NEG	C12H16O5				Shikimates and Phenylpropanoids	Phenolic acids (C6-C1)	Simple phenolic acids	UHEOCPAMGZSLMB-UHFFFAOYSA-N	0.0454547	0.0492364	0.059362	0.051351	0.0955997	0.0820277	0.0837757	0.0871344	1.26684	0.00385012	0.0167447	1.69684	0.762848
1170	5,6-Dihydroxytetradecanedioic acid	3.66	level1			289.165	244.5	NEG	C14H26O6				Fatty acids	Fatty Acids and Conjugates	Dicarboxylic acids	JCOCIXAHAFALHI-UHFFFAOYSA-N	0.142499	0.155859	0.148331	0.148896	0.181197	0.192042	0.166932	0.180057	1.19571	0.019373	0.0527396	1.20928	0.274143
1171	Clebopride (malate)	3.66	level1			372.148	211.6	NEG	C20H24ClN3O2	HMDB0250315	57645-91-7	D03534	Alkaloids			BVPWJMCABCPUQY-UHFFFAOYSA-N	0.146118	0.146661	0.204979	0.165919	2.8763	2.88492	2.64779	2.803	1.33702	5.06694e-06	0.000504648	16.8938	4.07842
1173	cis-​9,​10-​Epoxystearic acid	3.66	level1			279.232	67.7	NEG	C18H34O3	HMDB0247617	24560-98-3	C19418	Fatty acids	Octadecanoids	Other Octadecanoids	IMYZYCNQZDBZBQ-UHFFFAOYSA-N	2.2743	2.40565	2.45514	2.37836	3.2104	2.99166	3.20243	3.13483	1.30538	0.00108141	0.00728298	1.31806	0.398418
1174	Gly-Ala	3.65	level1			145.062	91.3	NEG	C5H10N2O3	HMDB0252875	3695-73-6		Amino acids and Peptides	Small peptides	Dipeptides	VPZXBVLAVMBEQI-VKHMYHEASA-N	0.0608487	0.0738661	0.090739	0.0751513	0.1136	0.241608	0.227863	0.194357	1.15607	0.0453108	0.100145	2.58621	1.37084
1175	3,3-Dimethylcyclohexanone	3.65	level1			109.101	365.4	POS	C8H14O		2979-19-3					ZVJQBBYAVPAFLX-UHFFFAOYSA-N	0.00404585	0.00385311	0.00455684	0.00415193	0.0028712	0.00223914	0.00269833	0.00260289	1.25393	0.00536799	0.0210532	0.626911	-0.673667
1176	PF-915275	3.65	level1			351.086	356.8	POS	C18H14N4O2S	HMDB0256368	857290-04-1					ZESFDAKNYJQYKO-UHFFFAOYSA-N	0.00196045	0.00100759	0.00113724	0.00136843	0.00420202	0.00584225	0.00501706	0.00502044	1.27101	0.00284855	0.0136959	3.66877	1.8753
1177	Oxodecadienoylcarnitine (Car(10:3-O))	3.65	level1			326.195	255.3	POS	C17H27NO5							VYSOXFPSOQHOSK-SUTYWZMXSA-N	0.0463447	0.0428075	0.0461012	0.0450845	0.196852	0.179997	0.181849	0.186232	1.33947	1.32723e-05	0.00071967	4.13074	2.0464
1178	Decadienedioylcarnitine (Car(10:2-O2))	3.65	level1			342.19	310.2	POS	C17H27NO6	HMDB0241115			Fatty acids	Fatty esters	Fatty acyl carnitines	QIOKVSZQLUIDLW-JEGFTUTRSA-N	0.00104279	0.000473992	0.000248916	0.000588565	0.00635795	0.0066197	0.00754006	0.00683924	1.27825	0.000129405	0.00208679	11.6202	3.53856
1180	1-BCP	3.65	level1			234.112	72.9	POS	C13H15NO3	HMDB0243831	34023-62-6		Alkaloids	Lysine alkaloids	Piperidine alkaloids	BXBNADAPIHHXJQ-UHFFFAOYSA-N	0.000595443	0.0010152	0.000725091	0.000778578	0.0942696	0.0532786	0.0819807	0.0765097	1.33457	0.0247577	0.0632689	98.2684	6.61866
1182	2-(2-acetoxy-12-hydroxy-tridecyl)-4,6-dihydroxy-benzoic acid	3.64	level1			409.221	376.8	NEG	C22H34O7		133361-20-3		Shikimates and Phenylpropanoids	Phenolic acids (C6-C1)	Simple phenolic acids	NDPYMEUORCDDDL-UHFFFAOYSA-N	0.0631487	0.0856448	0.078096	0.0756299	0.0381714	0.0380053	0.0387842	0.0383203	1.29536	0.0298481	0.0729702	0.506682	-0.980847
1183	3-(2,5-Dimethoxyphenyl)propionic acid	3.64	level1			209.079	325.8	NEG	C11H14O4		10538-49-5		Alkaloids			JENQUCZZZGYHRW-UHFFFAOYSA-N	0.0245878	0.0280305	0.029726	0.0274481	0.0102402	0.0108984	0.00767503	0.00960454	1.30723	0.000585391	0.00494768	0.349916	-1.51492
1185	Sec-O-Glucosylhamaudol	3.64	level1			437.145	281.6	NEG	C21H26O10		80681-44-3	C17484	Polyketides	Chromanes	Chromones	QVUPQEXKTXSMKX-JJDILSOYSA-N	0.0165761	0.0202006	0.0207749	0.0191839	0.032942	0.0290129	0.0304422	0.030799	1.27133	0.0026473	0.0130289	1.60546	0.682991
1186	Sappanone A	3.64	level1			285.078	267.7	POS	C16H12O5		102067-84-5		Shikimates and Phenylpropanoids	Flavonoids	Aurones	KVYZXXBTJHJISR-BJMVGYQFSA-N	0.0164655	0.0180088	0.0154559	0.0166434	0.0416549	0.0458359	0.0419252	0.0431387	1.3332	6.72051e-05	0.00148633	2.59193	1.37403
1188	2-(2-acetyl-3-hydroxy-5-methoxy-phenyl)acetic acid	3.64	level1			225.075	239.4	POS	C11H12O5		19054-28-5		Polyketides			UYUOIPIOTPMHKV-UHFFFAOYSA-N	0.0277438	0.0265328	0.0267022	0.0269929	0.0342184	0.0381098	0.0330503	0.0351262	1.2689	0.00668869	0.024525	1.30131	0.379966
1189	2-Aminopimelate	3.64	level1			156.067	98.7	NEG	C7H13NO4	HMDB0034252	26630-55-7		Amino acids and Peptides	Small peptides	Aminoacids	JUQLUIFNNFIIKC-UHFFFAOYSA-N	0.0794727	0.0925461	0.0899147	0.0873112	0.0593579	0.0585204	0.0552329	0.0577037	1.3013	0.00210844	0.0112261	0.660898	-0.597501
1190	Oxopentylcarnitine (Car(5:1-O))	3.64	level1			260.149	255.9	POS	C12H21NO5							ZNYVIHZOFMRENH-UHFFFAOYSA-N	0.00790622	0.0167275	0.011678	0.0121039	0.0345367	0.0249465	0.0216561	0.0270464	1.14093	0.0321052	0.0770751	2.23452	1.15997
1191	GlcCer(d18:1/16:0)	3.64	level1			700.564	71.5	POS	C40H77NO8	HMDB0004971	74365-77-8		Fatty acids	Sphingolipids	Neutral glycosphingolipids	VJLLLMIZEJJZTE-BFZYYLOBSA-N	0.0222532	0.0285229	0.03022	0.0269987	0.0185717	0.0204001	0.0205151	0.019829	1.11985	0.045736	0.100866	0.734442	-0.44528
1193	Brefeldin A	3.64	level1			279.163	25.2	NEG	C16H24O4				Polyketides	Macrolides	Macrolide lactones	KQNZDYYTLMIZCT-UHFFFAOYSA-N	0.810856	0.921595	0.82606	0.852837	0.259252	0.226364	0.275815	0.25381	1.33262	9.05623e-05	0.00173497	0.297607	-1.74852
1198	PC(44:8)	3.63	level1			886.621	601.6	POS	C52H88NO8P							POFXXMMFLNVHNN-VURCPXDFSA-N	0.00053348	0.000832769	0.000748329	0.00070486	0.0541466	0.0711713	0.0748445	0.0667208	1.33796	0.00918896	0.0306985	94.6583	6.56466
1202	10-[(2R,3R,4S,5S,6R)-3,4,5-trihydroxy-6-(hydroxymethyl)tetrahydropyran-2-yl]oxydeca-4,6-diynoic acid	3.63	level1			341.123	285.5	NEG	C16H22O8							BAGGOTACEXSWCA-YMILTQATSA-N	0.0808356	0.0897245	0.0885833	0.0863811	0.166679	0.165993	0.154475	0.162382	1.33033	9.64205e-05	0.00179272	1.87983	0.910606
1205	2-hydroxy-3,4-bis(hydroxymethyl)benzoic acid	3.63	level1			197.045	159.9	NEG	C9H10O5				Shikimates and Phenylpropanoids	Phenolic acids (C6-C1)	Simple phenolic acids	ABLKOPZEYPMJQS-UHFFFAOYSA-N	0.040566	0.0395587	0.0356537	0.0385928	0.0293495	0.0246505	0.0269866	0.0269955	1.2637	0.00456825	0.0188322	0.699496	-0.515612
1207	(2S,4aS,6aR,6aS,6bR,8aR,10S,12aS,14bR)-10-(3-carboxypropanoyloxy)-2,4a,6a,6b,9,9,12a-heptamethyl-13-oxo-3,4,5,6,6a,7,8,8a,10,11,12,14b-dodecahydro-1H-picene-2-carboxylic acid	3.62	level1			569.345	448.2	NEG	C34H50O7		5697-56-3	D07615	Terpenoids	Triterpenoids	Oleanane triterpenoids	OBZHEBDUNPOCJG-WBXJDKIVSA-N	0.000649586	0.00111187	0.000284938	0.000682132	0.0203401	0.0149381	0.026033	0.0204371	1.30368	0.024761	0.0632751	29.9606	4.90499
1208	4-hydroxy-4-[(E)-3-hydroxybut-1-enyl]-3,5,5-trimethyl-cyclohex-2-en-1-one	3.62	level1			223.136	238.6	NEG	C13H20O3		24427-77-8	C04166	Terpenoids	Apocarotenoids	Apocarotenoids(ε-)	KPQMCAKZRXOZLB-AATRIKPKSA-N	0.669308	0.757317	0.716282	0.714303	0.423797	0.462034	0.477169	0.454333	1.30931	0.000972966	0.00680448	0.636051	-0.652785
1209	3,7-Dimethyluric acid	3.62	level1			195.051	88.8	NEG	C7H8N4O3	HMDB0001982	13087-49-5	C16360	Alkaloids	Pseudoalkaloids	Purine alkaloids	HMLZLHKHNBLLJD-UHFFFAOYSA-N	0.0308831	0.0309036	0.0347825	0.0321897	0.0692487	0.0524734	0.0490256	0.0569159	1.24383	0.0179021	0.0497486	1.76814	0.822231
1210	Nipecotic acid	3.62	level1			130.086	347	POS	C6H11NO2	HMDB0255618	498-95-3		Alkaloids	Lysine alkaloids		XJLSEXAGTJCILF-UHFFFAOYSA-N	0.0325969	0.0356123	0.0360133	0.0347409	0.0677623	0.0642381	0.0561627	0.062721	1.31073	0.0014753	0.00889898	1.8054	0.852316
1211	Lobetyolin	3.62	level1			395.17	200.8	NEG	C20H28O8		136085-37-5		Fatty acids	Fatty acyls	Fatty alcohols	MMMUDYVKKPDZHS-UPPVCQNNSA-N	0.0228181	0.050037	0.0183582	0.0304045	0.165737	0.150166	0.163029	0.159644	1.26691	0.00030065	0.0033082	5.25067	2.3925
1217	DMPO	3.61	level1			114.091	41.3	POS	C6H11NO	HMDB0246162	3317-61-1					VCUVETGKTILCLC-UHFFFAOYSA-N	0.0161763	0.0222924	0.0250567	0.0211751	0.00341134	0.00334365	0.00181535	0.00285678	1.3039	0.00237969	0.0121479	0.134912	-2.88991
1218	Protopine	3.61	level1			354.137	224.8	POS	C20H19NO5	HMDB0003920	130-86-9	C05189	Alkaloids	Tyrosine alkaloids	Isoquinoline alkaloids	GPTFURBXHJWNHR-UHFFFAOYSA-N	0.0130761	0.0147284	0.0122169	0.0133405	0.0103376	0.00995409	0.00987453	0.0100554	1.24394	0.0119117	0.0369954	0.753753	-0.407837
1219	Posaconazole	3.61	level1			701.332	464.7	POS	C37H42F2N8O4		171228-49-2	D02555				RAGOYPUPXAKGKH-XAKZXMRKSA-N	0.0042779	0.00479239	0.00491216	0.00466082	0.00309313	0.00208315	0.00263716	0.00260448	1.24075	0.00423184	0.0178593	0.558803	-0.839589
1220	4-Methyldaphnetin	3.61	level1			193.049	313.1	POS	C10H8O4		2107-77-9		Shikimates and Phenylpropanoids	Coumarins	Simple coumarins	NWQBYMPNIJXFNQ-UHFFFAOYSA-N	0.0250033	0.0163561	0.0210107	0.02079	0.0324182	0.0604975	0.0481512	0.0470223	1.1758	0.0367235	0.0853814	2.26177	1.17745
1221	7-Methylxanthine	3.61	level1			165.04	56.2	NEG	C6H6N4O2	HMDB0001991	552-62-5	C16353	Alkaloids	Pseudoalkaloids	Purine alkaloids	PFWLFWPASULGAN-UHFFFAOYSA-N	0.229512	0.288548	0.277794	0.265285	0.336504	0.41878	0.352762	0.369349	1.15809	0.0284533	0.0703533	1.39227	0.477441
1225	7-hydroxy-3-(4-hydroxyphenyl)-5-methoxy-chromen-4-one	3.6	level1			285.078	267.7	POS	C16H12O5		4569-98-6		Shikimates and Phenylpropanoids	Isoflavonoids	Isoflavones	YSINCDVRUMTOPK-UHFFFAOYSA-N	0.0164655	0.0180088	0.0154559	0.0166434	0.0416549	0.0458359	0.0419252	0.0431387	1.3332	6.72051e-05	0.00148633	2.59193	1.37403
1226	PC(39:7)	3.6	level1			800.567	569.1	POS	C47H80NO8P							ANSBSRQQQLGROE-ZEBHBPEESA-N	0.0208132	0.0194894	0.0216385	0.0206471	0.0394443	0.0336199	0.0285578	0.033874	1.24413	0.0145588	0.0427468	1.64062	0.714241
1228	Methyl dihydrojasmonate	3.6	level1			227.163	416.9	POS	C13H22O3		24851-98-7		Fatty acids	Octadecanoids	Jasmonic acids	KVWWIYGFBYDJQC-UHFFFAOYSA-N	0.00794419	0.00990928	0.00902295	0.00895881	0.00556264	0.00522197	0.00497006	0.00525156	1.29492	0.00334957	0.0152389	0.586189	-0.770562
1230	(10Z,13Z)-15,16-dihydroxyoctadeca-10,13-dienoic acid	3.6	level1			313.236	392	POS	C18H32O4				Fatty acids	Octadecanoids	Other Octadecanoids	IQWYIIPDFISFMV-HWXFIQLYSA-N	0.0628601	0.0724169	0.0658982	0.0670584	0.0586974	0.0599261	0.0559097	0.0581777	1.11934	0.0439924	0.0979575	0.867568	-0.204951
1231	(1R,6R,13R)-13-hydroxy-6-(1-hydroxy-1-methyl-ethyl)-16,17-dimethoxy-2,7,20-trioxapentacyclo[11.8.0.03,11.04,8.014,19]henicosa-3(11),4(8),9,14,16,18-hexaen-12-one	3.6	level1			427.142	376.6	NEG	C23H24O8		85042-77-9		Shikimates and Phenylpropanoids	Isoflavonoids	Rotenoids	NSFCLBVWJYYZMR-DNVFCKCGSA-N	0.12638	0.149462	0.143768	0.13987	0.0978861	0.0733169	0.0783593	0.0831874	1.25248	0.0051588	0.0204918	0.594748	-0.749649
1232	3-(2,4-Dihydroxypentyl)-6,8-dihydroxyisochromen-1-one	3.6	level1			279.09	315.1	NEG	C14H16O6				Shikimates and Phenylpropanoids	Coumarins	Isocoumarins	CQXZVXNVRFIVCN-UHFFFAOYSA-N	0.0128786	0.0248633	0.0312222	0.022988	0.169632	0.169898	0.144196	0.161242	1.2952	0.000163578	0.00237227	7.01417	2.81027
1233	methyl (1S,4aS,8S,8aS)-1-methyl-3-oxo-8-[(2S,3R,4S,5S,6R)-3,4,5-trihydroxy-6-(hydroxymethyl)tetrahydropyran-2-yl]oxy-4,4a,8,8a-tetrahydro-1H-pyrano[3,4-c]pyran-5-carboxylate	3.6	level1			385.117	177.2	NEG	C17H24O11		25406-67-1		Terpenoids	Monoterpenoids	Iridoids monoterpenoids	QZCJFXSHMSZCLH-QAPDQXECSA-N	0.0555873	0.0602525	0.0539122	0.056584	0.112884	0.105261	0.103211	0.107119	1.32956	0.000133938	0.00212839	1.89309	0.920745
1236	Ganoderic acid B	3.59	level1			497.288	176.8	NEG	C30H44O7		81907-61-1		Terpenoids	Triterpenoids	Lanostane, Tirucallane and Euphane triterpenoids	LWPLEHFGBRFRKI-NBCWKOIPSA-N	0.149639	0.162656	0.15331	0.155202	0.111239	0.141078	0.116754	0.123024	1.12545	0.0318731	0.0766461	0.792668	-0.335211
1238	(2S,3S,4aS)-2,3,7-trihydroxy-9-methoxy-4a-methyl-3,4-dihydro-2H-benzo[c]chromen-6-one	3.59	level1			291.09	347	NEG	C15H16O6		29752-43-0		Shikimates and Phenylpropanoids	Coumarins	Isocoumarins	MMHTXEATDNFMMY-WBIUFABUSA-N	0.0847814	0.0951974	0.0888824	0.0896204	0.0328195	0.0378634	0.0305305	0.0337378	1.32713	0.000114917	0.00196196	0.376453	-1.40946
1240	Phenazopyridine (hydrochloride)	3.59	level1			214.107	98.4	POS	C11H11N5		136-40-3	C07429|D08346	Alkaloids	Pseudoalkaloids	Azo and Azoxy alkaloids	QPFYXYFORQJZEC-UHFFFAOYSA-N	0.00618547	0.00727645	0.00753045	0.00699746	0.00314852	0.0041267	0.00286524	0.00338015	1.26973	0.00300392	0.0141784	0.483054	-1.04974
1241	Bisindolylmaleimide I	3.58	level1			411.187	247.6	NEG	C25H24N4O2	HMDB0249269	133052-90-1	C11238	Alkaloids	Tryptophan alkaloids	Simple indole alkaloids	QMGUOJYZJKLOLH-UHFFFAOYSA-N	0.0271246	0.0265714	0.032371	0.028689	0.059192	0.0887943	0.0563945	0.0681269	1.25845	0.0200203	0.0540433	2.37467	1.24773
1243	Andrographolide	3.57	level1			351.213	376.5	POS	C20H30O5		5508-58-7	C20214	Terpenoids	Diterpenoids	Labdane diterpenoids	BOJKULTULYSRAS-OTESTREVSA-N	0.0698486	0.0755012	0.0724502	0.0726	0.0433294	0.0491074	0.0453464	0.0459277	1.31822	0.000345084	0.00358886	0.632614	-0.660604
1244	5,7-dihydroxy-4-(4-methoxyphenyl)chroman-2-one	3.57	level1			285.08	348.2	NEG	C16H14O5				Shikimates and Phenylpropanoids	Flavonoids	Neoflavonoids	OKBWVJGQTFYYQA-UHFFFAOYSA-N	0.0773486	0.0771375	0.0990839	0.0845233	0.149679	0.182567	0.131251	0.154499	1.23617	0.0137517	0.0410168	1.82789	0.870177
1245	(9a-methyl-2',3-dioxo-spiro[4,5,5a,7,8,9-hexahydro-1H-benzo[e]isobenzofuran-6,3'-oxetane]-5-yl) acetate	3.57	level1			319.122	343.3	NEG	C17H20O6				Terpenoids	Sesquiterpenoids		MGKXQDVWRGLKTM-UHFFFAOYSA-N	0.00396049	0.00347173	0.00185256	0.00309493	0.246193	0.250486	0.221606	0.239428	1.33384	0.00137925	0.00852705	77.3615	6.27354
1249	(3E,4R)-3-[2-[(1R,4aS,5R,6R,8aS)-6-hydroxy-5-(hydroxymethyl)-5,8a-dimethyl-2-methylene-decalin-1-yl]ethylidene]-4-hydroxy-tetrahydrofuran-2-one	3.56	level1			351.213	376.5	POS	C20H30O5		142037-79-4		Terpenoids	Diterpenoids	Labdane diterpenoids	BOJKULTULYSRAS-NPWGMBKGSA-N	0.0698486	0.0755012	0.0724502	0.0726	0.0433294	0.0491074	0.0453464	0.0459277	1.31822	0.000345084	0.00358886	0.632614	-0.660604
1250	SM(d36:2)	3.56	level1			729.583	573.7	POS	C41H81N2O6P							SHPISFZHCUNAIC-VSWYSSNSSA-N	0.0246852	0.0134218	0.0216172	0.0199081	0.00298652	0.00267584	0.00348925	0.00305054	1.31132	0.0369689	0.0857881	0.153231	-2.70622
1254	7-benzyl-16-isobutyl-10,13-diisopropyl-11,14-dimethyl-17-oxa-1,5,8,11,14-pentazabicyclo[17.3.0]docosane-2,6,9,12,15,18-hexone	3.55	level1			654.394	398.6	NEG	C35H53N5O7				Amino acids and Peptides	Oligopeptides	Cyclic peptides	RPJBXUNEXVNBIF-UHFFFAOYSA-N	0.00652935	0.00750707	0.00965888	0.00789843	0.0277486	0.0360895	0.0274265	0.0304216	1.31172	0.00164721	0.00954639	3.85159	1.94546
1255	Foretinib	3.55	level1			631.233	292	NEG	C34H34F2N4O6	HMDB0252437	849217-64-7	D09618	Alkaloids			CXQHYVUVSFXTMY-UHFFFAOYSA-N	0.0245953	0.022616	0.0224874	0.0232329	0.068707	0.0672637	0.079356	0.0717756	1.33402	0.00023329	0.0028561	3.08939	1.62732
1261	[(E)-6-hydroxy-6-(2-hydroxy-3a,6,6,10b,12a-pentamethyl-9,11-dioxo-1,2,3,3b,4,10,10a,12-octahydroindeno[5,4-g][2,3]benzodioxepin-1-yl)-2-methyl-5-oxohept-3-en-2-yl] acetate	3.54	level1			541.276	368.9	NEG	C31H44O9				Terpenoids	Triterpenoids	Cucurbitane triterpenoids	FQUYVFCSGVIXIE-OUKQBFOZSA-N	0.00379373	0.00493052	0.00332038	0.00401488	0.0153683	0.0151407	0.0136155	0.0147081	1.31894	0.000125507	0.00205197	3.66341	1.87319
1262	Moclobemide	3.54	level1			267.087	260.6	NEG	C13H17ClN2O2	HMDB0015302	71320-77-9	D02561	Alkaloids			YHXISWVBGDMDLQ-UHFFFAOYSA-N	0.176017	0.198765	0.19705	0.19061	0.319469	0.228399	0.306299	0.284722	1.16235	0.0326735	0.0781124	1.49374	0.578928
1263	Gly-His	3.54	level1			211.082	346.4	NEG	C8H12N4O3	HMDB0028843	2489-13-6		Amino acids and Peptides	Small peptides	Aminoacids	YIWFXZNIBQBFHR-LURJTMIESA-N	0.159323	0.196802	0.191788	0.182637	0.0475975	0.0393192	0.0371093	0.041342	1.32955	0.000314785	0.00339593	0.226361	-2.1433
1264	2-(3,4-dihydroxyphenyl)chromen-4-one	3.53	level1			235.043	283.9	NEG	C15H10O4		4143-64-0		Shikimates and Phenylpropanoids	Flavonoids	Flavones	SRNPMQHYWVKBAV-UHFFFAOYSA-N	0.0907515	0.086032	0.0872384	0.0880073	0.10057	0.102877	0.0938806	0.0991092	1.18175	0.0218887	0.0577144	1.12615	0.171396
1265	Vincamine	3.53	level1			337.186	242.3	POS	C21H26N2O3	HMDB0253707	1617-90-9	C09251	Alkaloids	Tryptophan alkaloids	Aspidosperma-Iboga hybrid type (Vinca alkaloids)	RXPRRQLKFXBCSJ-GIVPXCGWSA-N	0.126526	0.102223	0.111667	0.113472	0.612769	0.542112	0.62249	0.592457	1.33579	5.34392e-05	0.001333	5.22118	2.38437
1267	5-Hydroxytryptophan	3.53	level1			219.08	285.3	NEG	C11H12N2O3	HMDB0000472	4350-09-8	C00643	Amino acids and Peptides	Small peptides	Aminoacids	LDCYZAJDBXYCGN-VIFPVBQESA-N	0.0373181	0.0356852	0.0356564	0.0362199	0.0286481	0.0291763	0.0306945	0.0295063	1.30176	0.0012308	0.00792097	0.814644	-0.295758
1268	CD437	3.53	level1			397.186	112.6	NEG	C27H26O3	HMDB0244485	125316-60-1					LDGIHZJOIQSHPB-UHFFFAOYSA-N	0.028672	0.0232917	0.0249185	0.0256274	0.0718218	0.102172	0.0744097	0.0828013	1.3107	0.00437277	0.0182705	3.23097	1.69197
1270	Tetrahydrocurcumin	3.51	level1			355.159	283.5	POS	C21H24O6	HMDB0005789	36062-04-1		Shikimates and Phenylpropanoids	Diarylheptanoids	Linear diarylheptanoids	LBTVHXHERHESKG-UHFFFAOYSA-N	0.0441156	0.0460629	0.0323121	0.0408302	0.0958249	0.0848419	0.0773471	0.0860046	1.27052	0.00277384	0.0134487	2.1064	1.07478
1271	(1R,8R,9S,16R)-8,16-bis(4-hydroxyphenyl)-15-oxatetracyclo[8.6.1.02,7.014,17]heptadeca-2(7),3,5,10(17),11,13-hexaene-4,6,9,12-tetrol	3.51	level1			451.124	100.2	NEG	C28H22O7		105108-08-5		Shikimates and Phenylpropanoids	Stilbenoids	Oligomeric stibenes	LHUHHURKGTUZHU-MUUFRUSVSA-N	0.214739	0.196313	0.178108	0.196387	0.505413	0.409507	0.384047	0.432989	1.30078	0.00353305	0.0157974	2.20478	1.14063
1272	3-(2,3-dihydroxypropyl)-6,8-dihydroxy-isochromen-1-one	3.5	level1			251.059	308	NEG	C12H12O6				Shikimates and Phenylpropanoids	Coumarins	Isocoumarins	VILYFHCPBMAWFN-UHFFFAOYSA-N	0.0298493	0.00712557	0.0334771	0.023484	0.289505	0.320538	0.297628	0.302557	1.26114	2.32506e-05	0.00090741	12.8835	3.68746
1273	Scopolamine N-oxide	3.5	level1			320.154	226.8	POS	C17H21NO5		6106-81-6		Alkaloids	Ornithine alkaloids	Tropane alkaloids	GSYQNAMOFFWAPF-IILNCVEESA-N	0.0227877	0.0194871	0.021179	0.0211513	0.0712149	0.0734133	0.0555921	0.0667401	1.32193	0.00131663	0.00827581	3.15537	1.65781
1274	[(7R,8R,10R,13S,17R)-17-(3-furyl)-4,4,8,10,13-pentamethyl-3,16-dioxo-6,7,9,11,12,17-hexahydro-5H-cyclopenta[a]phenanthren-7-yl] acetate	3.5	level1			431.228	69.1	NEG	C28H34O5		26241-51-0		Terpenoids	Triterpenoids	Limonoids	KWAMDQVQFVBEAU-HUTQNEDRSA-N	0.169826	0.210319	0.191144	0.190429	0.0470867	0.0499441	0.0452719	0.0474342	1.33498	0.00607346	0.0229231	0.249091	-2.00526
1276	(R)-[(2S,4S,5R)-5-ethylquinuclidin-2-yl]-(6-methoxy-4-quinolyl)methanol	3.48	level1			309.192	221	POS	C20H26N2O2		522-66-7		Alkaloids	Tryptophan alkaloids		LJOQGZACKSYWCH-WZBLMQSHSA-N	0.0163518	0.0140396	0.0147827	0.0150581	0.100845	0.0958059	0.0961012	0.0975841	1.33972	1.26369e-06	0.000307981	6.48052	2.69611
1277	(S)-[(2R,4S,5R)-5-ethylquinuclidin-2-yl]-(6-methoxy-4-quinolyl)methanol	3.48	level1			309.192	221	POS	C20H26N2O2		1435-55-8		Alkaloids	Tryptophan alkaloids		LJOQGZACKSYWCH-LHHVKLHASA-N	0.0163518	0.0140396	0.0147827	0.0150581	0.100845	0.0958059	0.0961012	0.0975841	1.33972	1.26369e-06	0.000307981	6.48052	2.69611
1280	[(3S,8S,9R,10R,12R,13S,14R,17S)-17-acetyl-3,8,14,17-tetrahydroxy-10,13-dimethyl-1,2,3,4,7,9,11,12,15,16-decahydrocyclopenta[a]phenanthren-12-yl] 4-hydroxybenzoate	3.46	level1			481.228	299.2	NEG	C28H36O8		84745-94-8		Terpenoids	Steroids	Pregnane steroids	IMRGSWAJVVVYOW-ZCARJHNXSA-N	0.0213402	0.022565	0.0241564	0.0226872	0.0437277	0.0431522	0.0420727	0.0429842	1.33229	2.82182e-05	0.000992159	1.89465	0.921928
1281	Tazarotene	3.44	level1			352.131	452.8	POS	C21H21NO2S	HMDB0014937	118292-40-3	C12531	Alkaloids	Nicotinic acid alkaloids	Pyridine alkaloids	OGQICQVSFDPSEI-UHFFFAOYSA-N	0.0556429	0.0742624	0.0417139	0.0572064	0.820669	0.572459	0.546282	0.64647	1.32191	0.0203084	0.0546005	11.3007	3.49833
1282	Hydroquinidine	3.43	level1			309.192	221	POS	C20H26N2O2	HMDB0242615	1435-55-8		Alkaloids	Tryptophan alkaloids		LJOQGZACKSYWCH-UHFFFAOYSA-N	0.0163518	0.0140396	0.0147827	0.0150581	0.100845	0.0958059	0.0961012	0.0975841	1.33972	1.26369e-06	0.000307981	6.48052	2.69611
1285	Carda-5,20(22)-dienolide, 3-[(2-O-beta-D-glucopyranosyl-beta-D-glucopyranosyl)oxy]-14-hydroxy-, (3beta)-	2.75	level2			719.325	239.4	POS	C35H52O14				Terpenoids	Steroids	Cardenolides	BPYRVOCFRMKMIP-VNHOZMEZSA-N	0.000173262	0.000142579	2.21181e-06	0.000106018	0.00340286	0.00310345	0.00366441	0.00339024	1.13346	4.27092e-05	0.00119266	31.9781	4.99901
1287	2-hydroxy-6-[(8Z,11Z)-pentadeca-8,11,14-trienyl]benzoic acid	2.75	level2			341.214	493.4	NEG	C22H30O3				Polyketides	Aromatic polyketides	Catechols with side chains	QUVGEKPNSCFQIR-UTOQUPLUSA-N	0.0273361	0.0280436	0.031283	0.0288876	0.0170495	0.0212664	0.0145046	0.0176068	1.21446	0.00821578	0.0283305	0.609495	-0.714313
1288	Diosmin	2.75	level2			607.167	279.4	NEG	C28H32O15				Shikimates and Phenylpropanoids	Flavonoids	Flavones	GZSOSUNBTXMUFQ-YFAPSIMESA-N	0.0638642	0.0661751	0.0676809	0.0659067	0.127006	0.123041	0.132416	0.127488	1.33687	3.04963e-05	0.00102591	1.93436	0.95186
1290	15,16-Dihydrotanshinone I	2.75	level2			279.1	74.2	POS	C18H14O3				Polyketides	Naphthalenes	Naphthoquinones	HARGZZNYNSYSGJ-JTQLQIEISA-N	0.0439328	0.0437035	0.0432107	0.0436156	0.254887	0.249526	0.229325	0.244579	1.34055	0.0014859	0.00894138	5.60761	2.48739
1293	3-hydroxy-3-methyl-5-oxo-5-[[(2R,3S,4S,5R,6S)-3,4,5-trihydroxy-6-(2-methyl-4-oxopyran-3-yl)oxyoxan-2-yl]methoxy]pentanoic acid	2.75	level2			455.115	449.6	POS	C18H24O12							WCVUIHQUPRXYKT-RGCIIANRSA-N	0.00771054	0.00760879	0.00818181	0.00783371	0.00424937	0.00448411	0.00407097	0.00426815	1.33222	7.49453e-05	0.001578	0.544844	-0.876085
1294	3-Hydroxyflavone	2.75	level2			237.053	345.2	NEG	C15H10O3	HMDB0031816	577-85-5	C01495	Shikimates and Phenylpropanoids	Flavonoids	Flavonols	HVQAJTFOCKOKIN-UHFFFAOYSA-N	0.010297	0.0129333	0.011412	0.0115474	0.00296369	0.00346206	0.00262179	0.00301585	1.32551	0.000442231	0.00416218	0.26117	-1.93694
1295	Rosmanol	2.75	level2			369.168	328.7	POS	C20H26O5				Terpenoids	Diterpenoids	Abietane diterpenoids	LCAZOMIGFDQMNC-FORWCCJISA-N	0.0968093	0.105523	0.105479	0.102604	0.308086	0.279118	0.272967	0.286724	1.33584	8.04074e-05	0.00163428	2.79447	1.48258
1296	lycorine	2.75	level2			288.12	197.5	POS	C16H17NO4				Alkaloids	Lysine alkaloids	Amarylidaceae alkaloids	XGVJWXAYKUHDOO-DANNLKNASA-N	0.0176667	0.0172515	0.0171969	0.0173717	0.0130398	0.0119326	0.012724	0.0125655	1.3226	0.000184308	0.00253778	0.723332	-0.467271
1297	ormosanine	2.75	level2			340.27	35.2	POS	C20H35N3				Alkaloids	Lysine alkaloids	Quinolizidine alkaloids	YUKCLPPRYNXRAF-CPPNMTBBSA-N	0.0120841	0.0103067	0.0115978	0.0113295	0.0204991	0.0171382	0.0146505	0.0174292	1.1944	0.0264107	0.0664443	1.53839	0.621422
1302	Usambarensine	2.74	level2			433.238	440.1	POS	C29H28N4				Alkaloids	Tryptophan alkaloids	Carboline alkaloids	VUMZOPMHFVDIMF-NLLHOBBWSA-N	0.00557899	0.00723717	0.00727687	0.00669768	0.00929993	0.00876957	0.0101864	0.00941863	1.16761	0.0173659	0.0486403	1.40625	0.491856
1304	4',7-Di-O-methylnaringenin	2.74	level2			301.1	365.9	POS	C17H16O5				Shikimates and Phenylpropanoids	Flavonoids	Flavanones	CKEXCBVNKRHAMX-HNNXBMFYSA-N	0.000890189	0.000529973	0.000605124	0.000675095	0.00829178	0.00939405	0.00884701	0.00884428	1.33151	1.70967e-05	0.000794462	13.1008	3.71158
1306	9-stearolic acid	2.74	level2			279.233	653.1	NEG	C18H32O2				Fatty acids	Fatty acyls	Hydrocarbons	RGTIBVZDHOMOKC-UHFFFAOYSA-N	0.394697	0.388702	0.409733	0.39771	0.55063	0.482966	0.577842	0.537146	1.25549	0.00848465	0.0289881	1.3506	0.433596
1309	(2E,4E,14E)-15-(1,3-benzodioxol-5-yl)-N-(2-methylpropyl)pentadeca-2,4,14-trienamide [IIN-based on	2.74	level2			434.267	527.4	POS	C26H37NO3							DRMOIHOBUYFDKF-HMZUNPFJSA-N	0.000915634	0.00132127	0.00149799	0.00124497	0.0494485	0.0531252	0.052623	0.0517322	1.33726	0.000402026	0.0039225	41.5531	5.37688
1310	FA 18:1+3O	2.74	level2			329.233	436.9	NEG	C18H34O5				Fatty acids	Octadecanoids	Other Octadecanoids	MDIUMSLCYIJBQC-UHFFFAOYSA-N	0.327034	0.97592	1.01511	0.772688	3.83119	1.49196	3.67189	2.99834	1.10163	0.047421	0.103621	3.88041	1.95621
1311	Medicagenic acid base + O-HexA, O-Pen-dHex-Pen	2.74	level2			1087.49	413.2	NEG	C52H80O24	HMDB0039292	128192-15-4		Terpenoids	Triterpenoids	Oleanane triterpenoids	RPWKGRUCXRZSSG-UHFFFAOYSA-N	0.00209889	0.00523656	0.00437023	0.00390189	0.00966105	0.00708762	0.00951223	0.00875363	1.10703	0.0179799	0.049905	2.24343	1.16571
1313	1,7,7-trimethylbicyclo[2.2.1]hept-2-yl 4-hydroxy-3-methoxybenzoate	2.74	level2			303.16	392	NEG	C18H24O4				Terpenoids	Monoterpenoids	Camphane monoterpenoids	KTOAGBIQQPGNIR-UHFFFAOYSA-N	0.0404413	0.0346587	0.0313866	0.0354955	0.0659693	0.0775797	0.0954047	0.0796512	1.27657	0.00788393	0.0275024	2.24398	1.16606
1314	14-Benzoylaconine	2.74	level2			604.312	390.4	POS	C32H45NO10				Alkaloids	Pseudoalkaloids	Terpenoid alkaloids	DHJXZSFKLJCHLH-BMTFSNIDSA-N	0.00420366	0.00487467	0.00503252	0.00470362	0.0168559	0.0142745	0.0145558	0.0152287	1.33016	0.000251544	0.00298992	3.23766	1.69495
1316	Furostane base -2H + 1O, O-Hex, O-Pen-dHex	2.74	level2			887.464	297.3	NEG	C44H72O18	HMDB0041051	105798-62-7		Terpenoids	Steroids	Furostane steroids	HWYCRLFVQVFKPD-UHFFFAOYSA-N	1.17468e-05	1.2935e-05	1.24167e-05	1.23661e-05	0.178007	0.168772	0.18179	0.176189	1.34146	0.00048125	0.00438332	14247.7	13.7984
1317	arborinine	2.74	level2			286.11	293.2	POS	C16H15NO4	HMDB0030177	5489-57-6	C10643	Alkaloids	Anthranilic acid alkaloids	Acridone alkaloids	ATBZZQPALSPNMF-UHFFFAOYSA-N	0.470129	0.4466	0.453025	0.456585	0.884293	0.822751	0.781391	0.829478	1.33006	0.000263914	0.00307629	1.8167	0.861322
1318	Flavone base + 3O, 1MeO, C-Hex-Hex	2.74	level2			623.161	284.2	NEG	C28H32O16	HMDB0037422	97605-25-9		Shikimates and Phenylpropanoids	Flavonoids	Flavones	AQQFWSYLUDMDBP-UHFFFAOYSA-N	0.0291928	0.0294541	0.0332612	0.030636	0.31621	0.321328	0.436738	0.358092	1.33575	0.0140574	0.0416806	11.6886	3.54703
1319	Casticin	2.74	level2			373.093	267.6	NEG	C19H18O8	HMDB0030660	479-91-4		Shikimates and Phenylpropanoids	Flavonoids	Flavonols	PJQLSMYMOKWUJG-UHFFFAOYSA-N	1.36857	1.4301	1.46073	1.4198	1.10993	1.0473	1.11693	1.09139	1.31232	0.000717942	0.00561567	0.768692	-0.379523
1321	Benzoic acid + 1O, O-Hex	2.74	level2			299.078	231.9	NEG	C13H16O8	HMDB0041271	10366-91-3		Shikimates and Phenylpropanoids	Phenolic acids (C6-C1)	Simple phenolic acids	TZPBMNKOLMSJPF-UHFFFAOYSA-N	0.159443	0.125198	0.185115	0.156585	0.216406	0.223615	0.203904	0.214642	1.09072	0.0336971	0.079967	1.37077	0.454982
1322	4-Hydroxybenzoylcholine	2.74	level2			224.127	215.5	POS	C12H18NO3	HMDB0029559	5094-31-5					BAPAICNRGIBFJT-UHFFFAOYSA-O	0.0202691	0.0277196	0.0267024	0.024897	0.0519351	0.0434877	0.0429717	0.0461315	1.25653	0.00468492	0.0191618	1.85289	0.889778
1323	O-Methylaloeresin A, 7-	2.74	level2			577.16	97.2	POS	C29H30O11				Polyketides	Chromanes	Chromones	WRLXHKDQSQMWSH-ZTUNSOAWSA-N	0.00220935	0.00216881	0.00214948	0.00217588	0.00459237	0.00442441	0.00393273	0.0043165	1.32877	0.00805085	0.0279206	1.9838	0.988265
1324	Castanospermine	2.74	level2			188.093	76.7	NEG	C8H15NO4				Alkaloids	Lysine alkaloids	Indolizidine alkaloids	JDVVGAQPNNXQDW-TVNFTVLESA-N	0.0674402	0.0748211	0.0716367	0.0712993	0.141375	0.139778	0.127269	0.136141	1.32882	0.000195399	0.00261961	1.90942	0.933138
1325	CROTONIC ACID	2.74	level2			85.0294	52.2	NEG	C4H6O2	HMDB0010720	3724-65-0	C01771	Fatty acids	Fatty Acids and Conjugates	Unsaturated fatty acids	LDHQCZJRKDOVOX-NSCUHMNNSA-N	0.624197	0.671486	0.614955	0.63688	0.540256	0.525513	0.542707	0.536158	1.27088	0.00532797	0.0209455	0.841852	-0.248361
1327	Kojic Acid	2.74	level2			143.033	4.7	POS	C6H6O4	HMDB0032923	501-30-4	C14516	Polyketides	Cyclic polyketides	4-pyrone derivatives	BEJNERDRQOWKJM-UHFFFAOYSA-N	0.0252928	0.0368258	0.028726	0.0302815	0.0515058	0.0540816	0.0472956	0.050961	1.22801	0.00635938	0.0236747	1.68291	0.750955
1329	Parishin E	2.74	level2			459.114	91.4	NEG	C19H24O13		952068-57-4					XAIUTKHLNZBMEG-HUNOYVTQSA-N	0.0255529	0.0260784	0.0221536	0.024595	0.0319329	0.0285511	0.0304336	0.0303059	1.16169	0.0220899	0.0581107	1.2322	0.301233
1331	Ergovaline	2.74	level2			534.271	129.9	POS	C29H35N5O5				Alkaloids	Tryptophan alkaloids	Ergot alkaloids	BGHDUTQZGWOQIA-VQSKNWBGSA-N	0.00808768	0.0105896	0.0104813	0.00971955	0.015095	0.0130486	0.0120358	0.0133932	1.10824	0.0390297	0.0894054	1.37796	0.462535
1333	Ala-Ile	2.74	level2			201.124	277.6	NEG	C9H18N2O3	HMDB0028690	29727-65-9					ZSOICJZJSRWNHX-ACZMJKKPSA-N	0.34374	0.318284	0.33205	0.331358	0.482516	0.476429	0.431448	0.463464	1.30158	0.00172399	0.00983718	1.39868	0.484066
1335	Nicotinoylcholine	2.74	level2			209.128	255.5	POS	C11H17N2O2							ZMPGJEYFRZCHQC-UHFFFAOYSA-N	0.0352271	0.0312863	0.0360611	0.0341915	0.0585446	0.0592467	0.0540616	0.0572843	1.31459	0.000459274	0.00425258	1.6754	0.744501
1336	8-[4,5-dihydroxy-6-(hydroxymethyl)-3-[3,4,5-trihydroxy-6-(hydroxymethyl)oxan-2-yl]oxyoxan-2-yl]-5,7-dihydroxy-2-(4-hydroxyphenyl)chromen-4-one	2.74	level2			593.15	195.7	NEG	C27H30O15				Shikimates and Phenylpropanoids	Flavonoids	Flavones	FYTOTHFWELWOCG-UHFFFAOYSA-N	0.0192359	0.0198109	0.0190535	0.0193668	0.181708	0.164016	0.164462	0.170062	1.34074	0.00146907	0.00887587	8.78111	3.1344
1337	5,7-Dimethoxy-4'-hydroxyflavanone	2.74	level2			299.09	181.1	NEG	C17H16O5				Shikimates and Phenylpropanoids	Flavonoids	Flavanones	REBBZOCNEVVAPX-UHFFFAOYSA-N	0.358847	0.426578	0.403774	0.3964	0.297232	0.288452	0.282148	0.289277	1.27001	0.00626172	0.0234241	0.729762	-0.454502
1338	2,3-dihydroxypropyl hexadecanoate [IIN-based on	2.74	level2			313.273	161	POS	C19H38O4	HMDB0245964			Fatty acids	Glycerolipids	Monoacylglycerols	QHZLMUACJMDIAE-UHFFFAOYSA-N	0.0243623	0.0217829	0.0257708	0.023972	0.0290172	0.0365483	0.0292313	0.031599	1.11883	0.0494835	0.107054	1.31816	0.398527
1340	FA 18:2+3O	2.74	level2			327.217	134.2	NEG	C18H32O5				Fatty acids	Octadecanoids	Other Octadecanoids	MKYUCBXUUSZMQB-UHFFFAOYSA-N	12.574	15.5586	14.6753	14.2693	2.40481	2.32972	2.14975	2.29476	1.33736	0.00515639	0.0204845	0.160818	-2.6365
1345	STIGMASTA-4,22-DIEN-3-ONE	2.73	level2			411.361	632.6	POS	C29H46O	HMDB0302659			Terpenoids	Steroids	Stigmastane steroids	MKGZDUKUQPPHFM-LPJPOILFSA-N	1.24975	1.19235	1.28667	1.24293	3.91077	4.24898	4.60868	4.25614	1.33668	0.00388942	0.0168632	3.4243	1.77581
1349	5-(1,2,4a,5-tetramethyl-7-oxo-3,4,8,8a-tetrahydro-2H-naphthalen-1-yl)-3-methylpentanoic acid	2.73	level2			319.228	499.3	NEG	C20H32O3				Terpenoids	Diterpenoids	Colensane and Clerodane diterpenoids	RNWHJFUXZQBBLK-UHFFFAOYSA-N	0.0344861	0.0394155	0.0375281	0.0371432	0.0316923	0.0323147	0.0253753	0.0297941	1.06129	0.0496885	0.107381	0.80214	-0.318074
1353	Oleanolic acid base + O-HexA-Hex	2.73	level2			793.437	401.9	NEG	C42H66O14	HMDB0034533	25406-56-8	C08984	Terpenoids	Triterpenoids	Oleanane triterpenoids	BQPYEFAVIPEQIK-UHFFFAOYSA-N	0.0226702	0.0270955	0.0226113	0.0241256	0.00886169	0.00620002	0.00730229	0.00745467	1.31522	0.000570729	0.00486931	0.308994	-1.69435
1357	Xanthorhamnin	2.73	level2			769.219	270.8	NEG	C34H42O20				Shikimates and Phenylpropanoids	Flavonoids	Flavonols	NMGVHLDIHNFGQB-OTCPXFHUSA-N	0.0127797	0.0149688	0.0136776	0.0138087	0.0296369	0.0321638	0.0349374	0.032246	1.32567	0.000371462	0.00375197	2.3352	1.22354
1359	[(3S,4R,5S)-5-[(2S,3R,4S,5S,6R)-4,5-dihydroxy-6-(hydroxymethyl)-2-(4-hydroxyphenoxy)oxan-3-yl]oxy-3,4-dihydroxyoxolan-3-yl]methyl 4-hydroxybenzoate	2.73	level2			569.151	102.1	NEG	C24H28O13				Terpenoids	Meroterpenoids	Meromonoterpenoids	GDCHGVOUTCXBSI-JALRXJJFSA-N	0.00989146	0.00901863	0.00999193	0.00963401	0.0125597	0.012416	0.0133448	0.0127735	1.29155	0.00175716	0.00996564	1.32587	0.406943
1360	maclurin	2.73	level2			263.06	43.7	POS	C13H10O6	HMDB0032644	519-34-6	C09951	Polyketides	Phloroglucinols	Acyl phloroglucinols	XNWPXDGRBWJIES-UHFFFAOYSA-N	0.899372	0.933423	0.873034	0.901943	0.63094	0.653509	0.782241	0.688897	1.1966	0.0132772	0.0399966	0.763792	-0.388749
1361	(1S,4S,5R,9S,10R,13R,14R)-14-hydroxy-5,9-dimethyl-14-(3-methylbutanoyloxymethyl)tetracyclo[11.2.1.01,10.04,9]hexadecane-5-carboxylic acid	2.73	level2			419.28	434.3	NEG	C25H40O5		256526-12-2		Terpenoids	Diterpenoids	Kaurane and Phyllocladane diterpenoids	FIOZUJXSEZUYCS-MTSAZYMTSA-N	0.00685307	0.00881615	0.00642828	0.00736583	0.182501	0.189447	0.233995	0.201981	1.33783	0.00671145	0.0245833	27.4214	4.77723
1362	8-(2-hexylcyclopropyl)octanoic acid	2.73	level2			267.233	562.8	NEG	C17H32O2		5618-00-8		Fatty acids	Fatty Acids and Conjugates	Carbocyclic fatty acids	MUZYOAHCGSIXJH-UHFFFAOYSA-N	0.85761	0.941515	1.46776	1.08896	2.15053	1.64564	2.23708	2.01108	1.14648	0.0254987	0.0646982	1.84679	0.885019
1363	5-hexyltetrahydrofuran-2-one	2.73	level2			169.123	416.5	NEG	C10H18O2		706-14-9		Fatty acids	Fatty esters	Lactones	IFYYFLINQYPWGJ-UHFFFAOYSA-N	0.621251	0.610304	0.575305	0.602287	1.16411	1.24501	1.29184	1.23365	1.33403	9.22726e-05	0.00175272	2.04828	1.03442
1364	4-hydroxy-7H-furo[3,2-g]chromen-7-one	2.73	level2			203.04	375.1	POS	C11H6O4	HMDB0013679	486-60-2	C00758	Shikimates and Phenylpropanoids	Coumarins	Simple coumarins	GIJHDGJRTUSBJR-UHFFFAOYSA-N	0.0126566	0.0132817	0.0126707	0.0128696	0.0900138	0.0945364	0.0904726	0.0916743	1.34121	0.000258061	0.00303718	7.1233	2.83255
1366	4-Acetyl-2-methoxyphenyl 6-O-beta-D-xylopyranosyl-beta-D-glucopyranoside	2.73	level2			483.146	227.4	POS	C20H28O12							PBILEZBWIBJOSA-UMSLJHCASA-N	0.00248343	0.00210741	0.00227959	0.00229014	0.00514817	0.00544439	0.00453577	0.00504278	1.31988	0.000676301	0.00541041	2.20195	1.13878
1370	beta-Cyano-alanine	2.73	level2			113.035	403.8	NEG	C4H6N2O2	HMDB0060245	6232-19-5	C02512				BXRLWGXPSRYJDZ-VKHMYHEASA-N	0.117754	0.173285	0.155792	0.148944	0.236266	0.227472	0.218408	0.227382	1.18076	0.010302	0.0332962	1.52663	0.610351
1371	4'-hydroxy-2',4,6'-trimethoxychalcone	2.73	level2			337.11	391.8	POS	C18H18O5				Shikimates and Phenylpropanoids	Flavonoids	Chalcones	FQZORWOCAANBNC-RMKNXTFCSA-N	0.0406204	0.0397258	0.0418067	0.0407176	0.0729815	0.0715156	0.0687448	0.0710806	1.33692	2.53028e-05	0.000944454	1.7457	0.803803
1373	platyphylline	2.73	level2			360.18	383.8	POS	C18H27NO5				Alkaloids	Ornithine alkaloids	Pyrrolizidine alkaloids	BTHCJHQOYFUIMG-REYNEDSXSA-N	0.0107838	0.00961447	0.0102237	0.0102073	0.0219612	0.0241043	0.0212223	0.0224293	1.33074	0.000191889	0.00259711	2.19737	1.13578
1374	Syringic acid	2.73	level2			197.045	366.8	NEG	C9H10O5	HMDB0002085	530-57-4	C10833	Shikimates and Phenylpropanoids	Phenolic acids (C6-C1)	Simple phenolic acids	JMSVCTWVEWCHDZ-UHFFFAOYSA-N	0.0112411	0.0131441	0.0124762	0.0122872	0.199765	0.224524	0.191553	0.20528	1.3401	0.00255815	0.0127412	16.7069	4.06237
1376	Hispiduloside	2.73	level2			463.12	270.8	POS	C22H22O11				Shikimates and Phenylpropanoids	Flavonoids	Flavones	GCLAFEGUXXHIFT-IWLDQSELSA-N	0.00603009	0.00464171	0.00544723	0.00537301	0.0114089	0.0124821	0.00916517	0.0110187	1.27289	0.00591707	0.0225117	2.05075	1.03615
1377	(2R,3R,4S,5S,6R)-2-[2-(4-methoxyphenyl)ethoxy]-6-[[(2S,3R,4S,5S)-3,4,5-trihydroxyoxan-2-yl]oxymethyl]oxane-3,4,5-triol	2.73	level2			469.166	268.2	POS	C20H30O11				Shikimates and Phenylpropanoids	Phenylethanoids (C6-C2)	Phenylethanoids	LQUPEGJECBPTCO-KDRUZJHHSA-N	0.00319978	0.00175028	0.00272185	0.0025573	0.0105584	0.01205	0.009398	0.0106688	1.29613	0.000763239	0.00583427	4.1719	2.0607
1378	(2R,3S,4S,5R,6R)-5-[(2S,3R,4R)-3,4-dihydroxy-4-(hydroxymethyl)oxolan-2-yl]oxy-2-(hydroxymethyl)-6-[2-(4-hydroxyphenyl)ethoxy]oxane-3,4-diol	2.73	level2			455.153	259.5	POS	C19H28O11				Shikimates and Phenylpropanoids	Phenylethanoids (C6-C2)	Phenylethanoids	WWVATHTYIDDAQF-DERWZFJFSA-N	0.000660816	0.00119009	0.00116967	0.00100686	0.00624206	0.0077427	0.00595466	0.00664647	1.31067	0.000629577	0.00517543	6.60119	2.72273
1379	beta-D-Glucopyranoside, (1R,2S,4R,5R)-5-hydroxy-1,7,7-trimethylbicyclo[2.2.1]hept-2-yl 6-O-[(2R,3R,4R)-tetrahydro-3,4-dihydroxy-4-(hydroxymethyl)-2-furanyl]-	2.73	level2			487.215	248.8	POS	C21H36O11				Terpenoids	Monoterpenoids	Camphane monoterpenoids	BVEVSYQMQABMQM-UHFFFAOYSA-N	0.00257538	0.00173847	0.00214415	0.00215267	0.00628541	0.00741707	0.00587704	0.00652651	1.30518	0.00109483	0.00733684	3.03182	1.60019
1380	Naringenin-7-O-beta-D-glucoside	2.73	level2			457.11	237.4	POS	C21H22O10				Shikimates and Phenylpropanoids	Flavonoids	Flavanones	DLIKSSGEMUFQOK-SFTVRKLSSA-N	0.00142141	0.000876784	0.00127228	0.00119016	0.00346596	0.00472901	0.00393729	0.00404409	1.29265	0.00209365	0.0111775	3.39794	1.76466
1381	Daphylloside	2.73	level2			469.131	216.1	POS	C19H26O12				Terpenoids	Monoterpenoids	Iridoids monoterpenoids	YSOBQIMODQOGKQ-HOZAMIDDSA-N	0.0156303	0.0124283	0.0157736	0.0146107	0.0454459	0.0631238	0.0557298	0.0547665	1.31875	0.00155953	0.00922237	3.74838	1.90627
1382	2-nonylquinolin-4(1H)-one	2.73	level2			272.2	202.9	POS	C18H25NO				Alkaloids	Tryptophan alkaloids	Quinoline alkaloids	KKRXDNYRUZGPFM-UHFFFAOYSA-N	0.0065152	0.00585968	0.00559303	0.0059893	0.0127741	0.0122121	0.0119647	0.012317	1.32927	6.41959e-05	0.00145262	2.05649	1.04019
1384	Isorhamnetin-3-O-rutinoside	2.73	level2			623.161	195.7	NEG	C28H32O16				Shikimates and Phenylpropanoids	Flavonoids	Flavonols	UIDGLYUNOUKLBM-GEBJFKNCSA-N	0.00638112	0.00370226	0.00684662	0.00564333	0.126291	0.116712	0.14445	0.129151	1.33032	0.0038794	0.0168347	22.8855	4.51636
1385	Sinapoylhexoside (isomer of 955)	2.73	level2			385.113	125	NEG	C17H22O10				Shikimates and Phenylpropanoids	Phenylpropanoids (C6-C3)	Cinnamic acids and derivatives	XRKBRPFTFKKHEF-UHFFFAOYSA-N	0.0708421	0.0442934	0.0673536	0.0608297	0.293842	0.248772	0.377907	0.30684	1.30514	0.00315236	0.0146489	5.04425	2.33464
1387	Cytisine	2.73	level2			191.117	69	POS	C11H14N2O				Alkaloids	Lysine alkaloids	Pyridine alkaloids	ANJTVLIZGCUXLD-DTWKUNHWSA-N	0.0217719	0.0268069	0.0272677	0.0252822	0.16299	0.168266	0.149285	0.160181	1.33646	2.20339e-05	0.000887379	6.3357	2.6635
1388	alpha-Keto-gamma-(methylthio)butyric_acid	2.73	level2			147.012	66.4	NEG	C5H8O3S	HMDB0001553	583-92-6	C01180	Fatty acids	Fatty Acids and Conjugates	Oxo fatty acids	SXFSQZDSUWACKX-UHFFFAOYSA-N	0.0612295	0.0672627	0.0653219	0.0646047	0.246124	0.340116	0.289142	0.291794	1.3306	0.0137027	0.0409199	4.51661	2.17524
1389	Methylgingerol	2.73	level2			307.191	55.5	NEG	C18H28O4	HMDB0029852						CTGAPJBPSCUFRO-UHFFFAOYSA-N	3.91509	4.99158	4.34703	4.4179	2.13799	2.18663	1.85277	2.05913	1.30726	0.00201875	0.0109042	0.466088	-1.10133
1390	4-Hydroxyglutamic acid	2.73	level2			144.03	347.9	NEG	C5H9NO5	HMDB0002273	2485-33-8	C05947	Amino acids and Peptides	Small peptides	Aminoacids	HBDWQSHEVMSFGY-STHAYSLISA-N	0.0430285	0.0383195	0.0444805	0.0419428	0.0676875	0.0724889	0.0725117	0.0708961	1.31731	0.000296264	0.00328064	1.6903	0.757282
1392	Hupehenine	2.72	level2			416.351	375.6	POS	C27H45NO2				Alkaloids	Pseudoalkaloids	Steroidal alkaloids	NEMWYOKGHGSVSC-MSSYMPDSSA-N	6.38392	6.941	6.63221	6.65238	27.5517	26.9122	24.1116	26.1918	1.33829	0.00241678	0.0122713	3.93722	1.97718
1395	Lonchocarpenin	2.72	level2			449.196	217.6	POS	C27H28O6				Shikimates and Phenylpropanoids	Coumarins	Pyranocoumarins	CCYKXDPVYWRNMH-UHFFFAOYSA-N	0.0211222	0.0201859	0.0209219	0.0207434	0.0444039	0.0415584	0.0391897	0.0417174	1.33326	0.000165706	0.00238948	2.01112	1.008
1396	Fragilin	2.72	level2			319.036	208.9	POS	C16H11ClO5				Polyketides	Polycyclic aromatic polyketides	Anthraquinones and anthrones	RTBAOFRCWWQFHB-UHFFFAOYSA-N	0.0029449	0.00280103	0.00388277	0.00320957	0.00857338	0.0111662	0.00976644	0.00983534	1.30867	0.00128919	0.00816502	3.06438	1.6156
1398	HYDRANGENOSIDE C	2.72	level2			577.229	570.3	NEG	C29H38O12				Terpenoids	Monoterpenoids	Secoiridoid monoterpenoids	GGNFGJZLCXTJLH-UHFFFAOYSA-N	0.0354132	0.0505584	0.0418946	0.0426221	0.00394085	0.0040572	0.00272455	0.0035742	1.32981	0.0117967	0.036735	0.0838579	-3.57591
1399	2,4,6-trihydroxy-5-[1-(4-hydroxy-1,1,4,7-tetramethyl-1a,2,3,4a,5,6,7a,7b-octahydrocyclopropa[h]azulen-7-yl)-3-methylbutyl]benzene-1,3-dicarbaldehyde	2.72	level2			471.276	505.7	NEG	C28H40O6	HMDB0038704	142698-60-0		Polyketides	Phloroglucinols	Phloroglucinol-terpene hybrids	IBLPTYJTKWQCDX-UHFFFAOYSA-N	0.0153765	0.0177866	0.0201836	0.0177822	0.0482212	0.0422449	0.0403169	0.0435943	1.31228	0.000722391	0.00563955	2.45157	1.29371
1400	2-[(2S,4aR,8aS)-2-hydroxy-4a-methyl-8-methylidene-3,4,5,6,7,8a-hexahydro-1H-naphthalen-2-yl]prop-2-enoic acid	2.72	level2			249.149	501.8	NEG	C15H22O3				Terpenoids	Sesquiterpenoids	Eudesmane sesquiterpenoids	WQMBCGHXXVLQTE-CFVMTHIKSA-N	0.0125777	0.0129063	0.0138589	0.0131143	0.0103391	0.00949947	0.0119191	0.0105859	1.11845	0.0350381	0.0823799	0.807203	-0.308996
1401	Nuciferine	2.72	level2			296.159	501.4	POS	C19H21NO2				Alkaloids	Tyrosine alkaloids	Aporphine alkaloids	ORJVQPIHKOARKV-OAHLLOKOSA-N	0.181957	0.178214	0.19967	0.186614	0.00286009	0.00306181	0.00233635	0.00275275	1.34031	0.00127942	0.00812405	0.0147511	-6.08304
1402	9-HODE	2.72	level2			295.227	501.2	NEG	C18H32O3	HMDB0062652	98524-19-7		Fatty acids	Octadecanoids	Other Octadecanoids	NPDSHTNEKLQQIJ-ZJHFMPGASA-N	2.33246	2.53693	2.36887	2.41275	2.01006	2.17994	1.8037	1.9979	1.13161	0.0299192	0.0731028	0.828058	-0.272196
1403	(2alpha,3beta)-2,3-dihydroxyolean-12-en-28-oic acid	2.72	level2			473.361	497.3	POS	C30H48O4	HMDB0002392	4373-41-5	C16939	Terpenoids	Triterpenoids	Oleanane triterpenoids	MDZKJHQSJHYOHJ-LLICELPBSA-N	0.000437453	0.000682482	0.000187997	0.000435977	0.00597723	0.00679966	0.00817906	0.00698531	1.29583	0.000572347	0.00487884	16.0222	4.002
1404	Dihydrojasmonic Acid	2.72	level2			211.134	430.2	NEG	C12H20O3	HMDB0033601	98674-52-3		Fatty acids	Octadecanoids	Jasmonic acids	PQEYTAGBXNEUQL-UHFFFAOYSA-N	0.0681444	0.0734517	0.0721116	0.0712359	0.0634437	0.0631295	0.0577634	0.0614455	1.19412	0.0158889	0.0455616	0.862565	-0.213296
1408	methyl (2S,4aS,6aR,7R,10aR,10bR)-2-(furan-3-yl)-7-hydroxy-6a,10b-dimethyl-4-oxo-2,4a,5,6,10,10a-hexahydro-1H-benzo[f]isochromene-7-carboxylate	2.72	level2			397.161	398.4	POS	C21H26O6				Terpenoids	Diterpenoids		WWNYZTBMVRRLJM-GOLBOHCDSA-N	0.00138731	0.0012704	2.21181e-06	0.000886639	0.0355672	0.0358039	0.0286946	0.0333552	1.04934	0.000165298	0.00238749	37.6199	5.23342
1410	3-PRENYL-4-HYDROXYACETOPHENONE	2.72	level2			203.107	363.5	NEG	C13H16O2	HMDB0030770	26932-05-8	C10702	Shikimates and Phenylpropanoids			QJAPFSSVKIZTMR-UHFFFAOYSA-N	0.0144209	0.0214484	0.0213158	0.0190617	0.969865	0.933378	0.903429	0.935557	1.33841	0.000369623	0.00373911	49.0804	5.61708
1412	Flavone base + 4O, 1Prenyl	2.72	level2			353.102	296.9	NEG	C20H18O6	HMDB0034125	66056-19-7	C10486	Shikimates and Phenylpropanoids	Isoflavonoids	Isoflavones	KCUZCRLRQVRBBV-UHFFFAOYSA-N	0.0164279	0.00687323	0.0181551	0.0138188	0.0290252	0.0312138	0.0259806	0.0287399	1.06279	0.0174889	0.0489028	2.07977	1.05643
1413	Nordiazepam	2.72	level2			269.049	293.4	NEG	C15H11ClN2O	HMDB0060538	1088-11-5	C07486	Alkaloids	Anthranilic acid alkaloids	Benzodiazepine alkaloids	AKPLHCDWDRPJGD-UHFFFAOYSA-N	0.0423274	0.0438543	0.0421276	0.0427697	0.0702416	0.0673107	0.0704008	0.0693177	1.33715	2.03657e-05	0.000860523	1.62072	0.696634
1415	1,9b-dihydroxy-6,6,9a-trimethyl-1,5,5a,7,8,9-hexahydrobenzo[e][2]benzofuran-3-one	2.72	level2			265.144	289	NEG	C15H22O4				Terpenoids	Sesquiterpenoids	Drimane sesquiterpenoids	XLGNZQXMDVSKOV-UHFFFAOYSA-N	0.0438292	0.0321112	0.0538042	0.0432482	0.113827	0.108784	0.105316	0.109309	1.27742	0.000606777	0.00505782	2.52749	1.3377
1416	Hulupinic acid	2.72	level2			263.128	282.2	NEG	C15H20O4	HMDB0030102			Terpenoids	Meroterpenoids	Polyprenylated cyclic polyketides (Hop meroterpenoids)	KKNXLCGOZLVUHL-UHFFFAOYSA-N	0.0571238	0.0588566	0.0626685	0.0595496	0.267898	0.253904	0.24205	0.254617	1.33942	1.403e-05	0.000735134	4.27572	2.09617
1417	Acetosyringone	2.72	level2			197.08	280.1	POS	C10H12O4				Shikimates and Phenylpropanoids			OJOBTAOGJIWAGB-UHFFFAOYSA-N	0.205513	0.18444	0.200083	0.196679	0.295874	0.293553	0.295127	0.294851	1.32439	0.00377537	0.0165313	1.49915	0.584147
1418	4-Allyl-o-phenylenebis(beta-D-glucopyranoside)	2.72	level2			519.172	265.7	NEG	C21H30O12				Shikimates and Phenylpropanoids	Phenylpropanoids (C6-C3)	Cinnamic acids and derivatives	SFQLDKSMEHBZRN-LWZURRPWSA-N	0.249895	0.260205	0.253471	0.254524	0.436518	0.434723	0.427711	0.432984	1.33984	1.57672e-06	0.00033359	1.70115	0.766514
1419	Vindolinine	2.72	level2			359.171	252.6	POS	C21H24N2O2				Alkaloids	Tryptophan alkaloids	Aspidosperma type	JSLDLCGKZDUQSH-SBTGKJMVSA-N	0.0260158	0.0261424	0.0252382	0.0257988	0.0724529	0.0679619	0.0664415	0.0689521	1.33927	0.0013988	0.00860395	2.67269	1.41829
1421	Trachelanthine	2.72	level2			302.196	245.5	POS	C15H27NO5	HMDB0341200						DLNWZIVYKQXLTN-CGYUPCHJSA-N	0.0170898	0.0169976	0.0197394	0.0179423	0.0474468	0.0458121	0.0414931	0.0449173	1.32884	0.000171615	0.00243393	2.50343	1.32391
1422	Sinapic acid	2.72	level2			223.061	239.1	NEG	C11H12O5				Shikimates and Phenylpropanoids	Phenylpropanoids (C6-C3)	Cinnamic acids and derivatives	PCMORTLOPMLEFB-UHFFFAOYSA-N	0.18866	0.208416	0.199373	0.198816	0.217421	0.221143	0.217215	0.218593	1.14328	0.0277799	0.0690688	1.09947	0.136812
1424	Corylin	2.72	level2			321.11	211.7	POS	C20H16O4				Shikimates and Phenylpropanoids	Isoflavonoids	Isoflavones	PWAACAMQKVIVPZ-UHFFFAOYSA-N	0.0147881	0.0136381	0.0130609	0.013829	0.0198999	0.0179532	0.0172991	0.018384	1.24941	0.00810402	0.0280519	1.32938	0.410755
1425	Tetrahydropiperine	2.72	level2			290.17	51.5	POS	C17H23NO3				Alkaloids	Lysine alkaloids	Piperidine alkaloids	APZYKUZPJCQGPP-UHFFFAOYSA-N	0.0278883	0.0306168	0.0315069	0.030004	0.0479056	0.0375675	0.0417946	0.0424226	1.21636	0.0176862	0.0493063	1.4139	0.499678
1426	[3-[2,3-dihydroxypropoxy(hydroxy)phosphoryl]oxy-2-hydroxy-propyl] 12-methyltetradecanoate	2.72	level2			469.257	519.5	NEG	C21H43O9P		406220-40-4		Fatty acids	Glycerophospholipids	Glycerophosphoglycerols	DIGHTWUQPWHBPG-UHFFFAOYSA-N	0.140681	0.157227	0.165426	0.154445	0.271613	0.382563	0.322841	0.325672	1.28632	0.00647891	0.023988	2.10866	1.07633
1427	cis-Aconitic acid	2.72	level2			173.009	52.7	NEG	C6H6O6	HMDB0000072	4023-65-8	C00417	Fatty acids	Fatty Acids and Conjugates	Dicarboxylic acids	GTZCVFVGUGFEME-IWQZZHSRSA-N	3.50717	3.69003	3.48941	3.5622	5.51169	5.142	5.42785	5.36052	1.32928	0.000153439	0.00228984	1.50483	0.589603
1429	2-[4-[4-[(4-hydroxy-3-methoxy-phenyl)methyl]-3-(hydroxymethyl)tetrahydrofuran-2-yl]-2-methoxy-phenoxy]-6-(hydroxymethyl)tetrahydropyran-3,4,5-triol	2.72	level2			521.202	173.8	NEG	C33H53NO7				Shikimates and Phenylpropanoids	Lignans	Furanoid lignans	KNFOHFRALRKTOJ-UHFFFAOYSA-N	0.3219	0.320821	0.32872	0.323813	0.368437	0.338909	0.35355	0.353632	1.16053	0.0283145	0.070083	1.09209	0.127087
1430	(2R,3R,4S,5S,6R)-2-[(2E,6R)-6-hydroxy-2,6-dimethyl-octa-2,7-dienoxy]-6-(hydroxymethyl)tetrahydropyran-3,4,5-triol	2.72	level2			331.176	118.7	NEG	C34H46O18		64776-96-1		Terpenoids	Monoterpenoids	Acyclic monoterpenoids	WEHZDNHJZBEGME-PAHMEIBGSA-N	0.0338291	0.0294252	0.0795755	0.04761	0.109976	0.119878	0.118032	0.115962	1.13522	0.0138231	0.0411708	2.43567	1.28432
1432	Voacamine	2.72	level2			705.401	236.8	POS	C43H52N4O5				Alkaloids	Tryptophan alkaloids	Iboga type	VCMIRXRRQJNZJT-JAHAZDFLSA-N	0.00264365	0.00231074	0.00249432	0.0024829	0.00142725	0.00192026	0.00133299	0.00156017	1.19991	0.010991	0.0348619	0.628364	-0.670327
1433	DG(16:0/16:0/0:0)	2.72	level2			591.497	179.5	POS	C35H68O5	HMDB0007098		C00165	Fatty acids	Glycerolipids	Diacylglycerols	JEJLGIQLPYYGEE-XIFFEERXSA-N	0.00493045	0.00475918	0.00446109	0.00471691	0.00424908	0.00414711	0.00393695	0.00411105	1.18083	0.0213862	0.0567343	0.871556	-0.198334
1434	Feruloyl Hexoside (isomer of 847)	2.72	level2			355.103	155	NEG	C16H20O9				Shikimates and Phenylpropanoids	Phenylpropanoids (C6-C3)	Cinnamic acids and derivatives	JWRQVQWBNRGGPK-UHFFFAOYSA-N	0.0800613	0.0732379	0.0843684	0.0792225	0.14957	0.137904	0.152117	0.14653	1.32302	0.000246055	0.00295196	1.8496	0.887216
1436	4-Hydroxymandelonitrile	2.72	level2			150.055	88.2	POS	C8H7NO2							HOOOPXDSCKBLFG-UHFFFAOYSA-N	0.0282834	0.041679	0.0316436	0.0338687	0.0749652	0.0704268	0.0719006	0.0724309	1.28444	0.000810531	0.00604485	2.13858	1.09665
1439	Benzoylgomisin O	2.72	level2			521.219	327.6	POS	C30H32O8				Shikimates and Phenylpropanoids	Lignans	Dibenzocyclooctadienes lignans	XUGSROZUUURBSW-XOWTYJCDSA-N	0.00336091	0.00377232	0.00429098	0.00380807	0.0256761	0.0285734	0.0224839	0.0255778	1.33439	0.00556231	0.0215719	6.71674	2.74776
1441	Petiline	2.72	level2			414.336	223.3	POS	C27H43NO2				Alkaloids	Pseudoalkaloids	Steroidal alkaloids	QAGPPGDCPAPQLW-HAQROMNMSA-N	0.00627538	0.006895	0.00738916	0.00685318	0.0309196	0.0312194	0.0274627	0.0298672	1.33667	5.08346e-05	0.00130126	4.35815	2.12372
1442	Lupinine	2.72	level2			170.154	205.5	POS	C10H19NO				Alkaloids	Lysine alkaloids	Quinolizidine alkaloids	HDVAWXXJVMJBAR-VHSXEESVSA-N	0.00199658	0.00148848	0.00141978	0.00163495	0.00889657	0.00835986	0.00892948	0.00872864	1.33045	1.05985e-05	0.000657431	5.33879	2.41651
1443	(2R,3S,4S,5R,6R)-2-[[(2R,3R,4R,5S)-3,4-dihydroxy-5-(hydroxymethyl)oxolan-2-yl]oxymethyl]-6-[(2E)-3,7-dimethylocta-2,6-dienoxy]oxane-3,4,5-triol	2.72	level2			466.264	200.2	POS	C21H36O10				Terpenoids	Monoterpenoids	Acyclic monoterpenoids	AWDKYYYAAQQLEF-XRSPUIAPSA-N	0.00800752	0.0072497	0.00783103	0.00769608	0.0396447	0.0383643	0.034606	0.0375383	1.33873	0.00211722	0.011255	4.87759	2.28617
1444	Garcinone D	2.72	level2			451.171	194.9	POS	C24H28O7	HMDB0033332	107390-08-9		Shikimates and Phenylpropanoids	Xanthones	Plant xanthones	TYALNCRUIKOKGP-UHFFFAOYSA-N	0.00415572	0.00345646	0.00372358	0.00377859	0.0101041	0.00998046	0.0104328	0.0101725	1.33325	1.26819e-05	0.000706677	2.69214	1.42875
1445	RHAMNOSE	2.72	level2			163.061	161.4	NEG	C6H12O5	HMDB0000849	3615-41-6	C00507	Carbohydrates	Saccharides	Monosaccharides	SHZGCJCMOBCMKK-JFNONXLTSA-N	0.683551	0.714091	0.705195	0.700946	1.03852	1.06018	0.928111	1.00894	1.30498	0.00182221	0.0102092	1.43939	0.525462
1446	8-hydroxy-6,7-dimethoxy-2H-chromen-2-one	2.72	level2			223.06	135.2	POS	C11H10O5				Shikimates and Phenylpropanoids	Coumarins	Simple coumarins	QNFBKOHHLAWWTC-UHFFFAOYSA-N	0.0649709	0.0717162	0.071475	0.0693874	0.0282102	0.027496	0.0264559	0.0273874	1.3372	4.99801e-05	0.00128863	0.394702	-1.34116
1447	p-Coumaraldehyde	2.72	level2			147.045	121.6	NEG	C9H8O2				Shikimates and Phenylpropanoids	Phenylpropanoids (C6-C3)		CJXMVKYNVIGQBS-UHFFFAOYSA-N	0.440909	0.385093	0.453112	0.426371	0.042691	0.0399579	0.0418135	0.0414874	1.34014	0.00291137	0.013893	0.0973036	-3.36136
1448	(-)-Bilobalide	2.72	level2			325.092	121.5	NEG	C15H18O8	HMDB0242203			Terpenoids			MOLPUWBMSBJXER-UHFFFAOYSA-N	0.140313	0.127685	0.137324	0.135107	0.0366939	0.0369145	0.0313038	0.0349707	1.33606	1.88584e-05	0.00083334	0.258837	-1.94989
1449	Polyphyllin A	2.72	level2			577.37	84.9	POS	C33H52O8				Terpenoids	Steroids	Spirostane steroids	WXMARHKAXWRNDM-GAMIEDRGSA-N	0.00761761	0.00840223	0.00720062	0.00774015	0.0307212	0.0484855	0.0320478	0.0370848	1.31664	0.0354429	0.0831239	4.79123	2.2604
1450	(2E,4E)-N-(2-methylpropyl)dodeca-2,4-dienamide	2.72	level2			252.232	71.6	POS	C16H29NO				Fatty acids	Fatty amides	N-acyl amines	BBRMJCAPNGJKEM-AQASXUMVSA-N	0.0166447	0.0182099	0.0187054	0.0178533	0.0105645	0.0110167	0.0088759	0.0101524	1.29682	0.00102435	0.0070356	0.568654	-0.814377
1453	3-Hexen-1-ol O-b-D-glucopyranoside	2.72	level2			285.131	48.8	POS	C12H22O6				Fatty acids	Fatty acyl glycosides	Fatty acyl glycosides of mono- and disaccharides	OZIPFYKAIOOVEJ-ODWUMMNUSA-N	1.94999	1.7544	1.74257	1.81565	0.897551	0.950727	1.06793	0.972071	1.31529	0.000552898	0.00477529	0.535383	-0.901356
1454	Pyrimidinol	2.72	level2			153.102	33.7	POS	C8H12N2O	HMDB0245733			Alkaloids			AJPIUNPJBFBUKK-UHFFFAOYSA-N	0.00668621	0.00784519	0.00829937	0.00761025	0.00581186	0.00403918	0.00477426	0.0048751	1.17835	0.0177307	0.0493914	0.640596	-0.642513
1455	endothall	2.72	level2			185.045	189.7	NEG	C8H10O5		13114-29-9		Amino acids and Peptides	Small peptides	Aminoacids	GXEKYRXVRROBEV-UHFFFAOYSA-N	0.0137602	0.012004	0.0161014	0.0139552	0.0273034	0.0278103	0.0261517	0.0270885	1.29849	0.000515343	0.00457176	1.9411	0.956876
1457	Rubiarbonol A 7-acetate	2.72	level2			515.374	32	NEG	C32H52O5		1338588-80-9		Terpenoids	Triterpenoids	Fernane and Arborinane triterpenoids	XLTANSFXBPNHCI-BNXFXOOGSA-N	0.0620711	0.0820435	0.0563233	0.0668127	0.241029	0.223645	0.217239	0.227304	1.31826	0.000108789	0.00191145	3.40212	1.76643
1460	BETA-Febrifugine	2.71	level2			302.149	260.5	POS	C16H19N3O3				Alkaloids	Anthranilic acid alkaloids	Quinazoline alkaloids	FWVHWDSCPKXMDB-GJZGRUSLSA-N	0.0117357	0.0124105	0.0123602	0.0121688	0.0322819	0.0333261	0.0311522	0.0322534	1.33958	7.12329e-06	0.000565298	2.6505	1.40626
1461	Ecgonine-methyl-ester (EME)	2.71	level2			200.128	253.1	POS	C10H17NO3	HMDB0006406	7143-09-1	C12448	Alkaloids	Ornithine alkaloids	Tropane alkaloids	QIQNNBXHAYSQRY-ABIFROTESA-N	0.0458817	0.0424513	0.0422142	0.0435157	0.146706	0.139462	0.133679	0.139949	1.33865	1.67098e-05	0.000788748	3.21606	1.6853
1466	3-(4-Hydroxyphenyl)-1-propanol	2.71	level2			151.076	403.9	NEG	C9H12O2	HMDB0032599	10210-17-0		Shikimates and Phenylpropanoids			NJCVPQRHRKYSAZ-UHFFFAOYSA-N	0.0723401	0.0738155	0.0727692	0.0729749	0.0598931	0.056701	0.0508621	0.0558187	1.26297	0.00305888	0.0143525	0.764903	-0.386651
1467	Undecanedioic acid	2.71	level2			215.128	378	NEG	C11H20O4	HMDB0000888	1852-04-6		Fatty acids	Fatty Acids and Conjugates	Dicarboxylic acids	LWBHHRRTOZQPDM-UHFFFAOYSA-N	0.216999	0.260545	0.242909	0.240151	0.17578	0.164644	0.162259	0.167561	1.27473	0.00550002	0.0213988	0.697731	-0.519256
1468	5-hydroxy-2,2-dimethyl-10-(2-methylbut-3-en-2-yl)pyrano[3,2-g]chromen-8-one	2.71	level2			311.186	303.2	NEG	C19H20O4				Shikimates and Phenylpropanoids	Coumarins	Simple coumarins	WYMMNGQSPNWCIK-UHFFFAOYSA-N	0.0279081	0.00869335	0.0135356	0.0167123	0.10892	0.109965	0.109313	0.109399	1.26977	0.00377286	0.0165234	6.54601	2.71062
1474	Karanjin	2.71	level2			315.063	186.1	POS	C18H12O4	HMDB0253763			Shikimates and Phenylpropanoids	Flavonoids	Flavonols	LKPQNZRGGNOPPU-UHFFFAOYSA-N	0.00669772	0.00777077	0.00621402	0.00689417	0.0174384	0.0176098	0.0143821	0.0164768	1.31214	0.00111472	0.00741972	2.38996	1.25699
1477	Deoxythymidine 5'-diphosphate (dTDP)	2.71	level2			385.021	207.8	POS	C10H16N2O11P2	HMDB0001274	491-97-4	C00363	Carbohydrates	Nucleosides	Pyrimidine nucleos(t)ides	UJLXYODCHAELLY-XLPZGREQSA-N	0.0019092	0.00154042	0.00177533	0.00174165	0.00383039	0.00427488	0.00293917	0.00368148	1.26828	0.00888256	0.0299644	2.11379	1.07983
1478	Maltol	2.71	level2			127.039	274.2	POS	C3H6O3	HMDB0030776	118-71-8	C11918	Polyketides	Cyclic polyketides	4-pyrone derivatives	XPCTZQVDEJYUGT-UHFFFAOYSA-N	0.00419259	0.00566771	0.00569599	0.00518543	0.00775301	0.00685209	0.00687486	0.00715998	1.11934	0.026922	0.0674028	1.38079	0.465493
1479	Kainic acid	2.71	level2			214.107	138.3	POS	C10H15NO4				Alkaloids	Ornithine alkaloids	Pyrrolidine alkaloids	VLSMHEGGTFMBBZ-OOZYFLPDSA-N	0.0111848	0.0102299	0.0118931	0.0111026	0.0152957	0.0139267	0.0137845	0.0143356	1.23273	0.00900679	0.0302609	1.2912	0.368707
1481	Methyl nicotinic acid	2.71	level2			138.055	362.3	POS	C7H7NO2	HMDB0029806	93-60-7		Alkaloids	Nicotinic acid alkaloids	Pyridine alkaloids	YNBADRVTZLEFNH-UHFFFAOYSA-N	0.0312513	0.0281605	0.0330534	0.0308218	0.502406	0.385777	0.440905	0.443029	1.33833	0.00653542	0.0241317	14.3739	3.84538
1482	Benzoic acid + 1O, 2MeO, O-Hex	2.71	level2			359.097	343.2	NEG	C15H20O10							CIYLTHWUJCCASO-UHFFFAOYSA-N	0.0423594	0.0442024	0.0458775	0.0441464	0.0868662	0.0902349	0.0802775	0.0857929	1.33126	0.000176598	0.00247505	1.94337	0.958561
1483	N-Acetylserine	2.71	level2			148.06	321.2	POS	C5H9NO4	HMDB0002931	16354-58-8		Amino acids and Peptides	Small peptides	Dipeptides	JJIHLJJYMXLCOY-BYPYZUCNSA-N	0.00529454	0.00185435	0.00150321	0.00288403	0.0297552	0.0298112	0.0265471	0.0287045	1.27836	9.0743e-05	0.00173633	9.9529	3.31512
1484	Trans-Zeatin-9-glucoside	2.71	level2			382.171	281.2	POS	C16H23N5O6				Alkaloids	Pseudoalkaloids	Purine alkaloids	VYRAJOITMBSQSE-HNVSNYHQSA-N	0.00412439	0.00423318	0.00346883	0.00394213	0.00630953	0.00477738	0.00511588	0.00540093	1.1137	0.0491935	0.106586	1.37005	0.454231
1485	Homostachydrine	2.71	level2			158.117	280.8	POS	C8H15NO2	HMDB0033433	472-22-0	C08283				XULZWQRXYTVUTE-ZETCQYMHSA-N	0.0321671	0.0292527	0.0319222	0.031114	0.185477	0.174483	0.1689	0.176287	1.33996	8.10148e-06	0.000590551	5.66583	2.50229
1486	Methylnissolin-3-O-glucoside	2.71	level2			485.141	268.2	POS	C23H26O10				Shikimates and Phenylpropanoids	Isoflavonoids	Pterocarpan	PCIXSTFFMHVOMF-UHFFFAOYSA-N	0.00159424	0.000894998	0.00105559	0.00118161	0.00531014	0.0060236	0.00462278	0.00531884	1.30282	0.000820525	0.00608776	4.50135	2.17036
1489	Convolidine	2.71	level2			278.138	37.9	POS	C15H19NO4				Alkaloids	Ornithine alkaloids	Tropane alkaloids	GWWGRYGNRKFSSX-UHFFFAOYSA-N	0.100375	0.116074	0.116764	0.111071	0.0725423	0.0690535	0.0424639	0.0613532	1.16269	0.0103357	0.0333714	0.552377	-0.856276
1492	Rutaecarpine	2.71	level2			310.089	443.3	POS	C18H13N3O	HMDB0042010	84-26-4	C09238	Alkaloids	Tryptophan alkaloids	Carboline alkaloids	ACVGWSKVRYFWRP-UHFFFAOYSA-N	0.00105842	0.00114306	0.00123861	0.0011467	0.00225629	0.00243868	0.00215941	0.00228479	1.32328	0.000302007	0.00331451	1.9925	0.994577
1493	Quercitrin	2.71	level2			471.089	359.7	POS	C21H20O11	HMDB0033751	522-12-3	C01750	Shikimates and Phenylpropanoids	Flavonoids	Flavonols	OXGUCUVFOIWWQJ-HQBVPOQASA-N	0.000255115	0.000161376	0.000183879	0.000200123	0.0013758	0.0017288	0.0011697	0.00142477	1.32045	0.00178602	0.0100827	7.11944	2.83176
1496	Demethoxycentaureidin 7-O-rutinoside	2.71	level2			637.176	294.8	NEG	C29H34O16				Shikimates and Phenylpropanoids	Flavonoids	Flavones	PYPKJBUJNZMSTH-UHFFFAOYSA-N	0.00471466	0.00357618	0.00438424	0.00422503	0.0249	0.0213062	0.0227251	0.0229771	1.33315	6.90472e-05	0.00150916	5.43833	2.44316
1498	(2S,3R,4S,5R)-2-[(2R,3R,4S,5S,6R)-4,5-dihydroxy-6-(hydroxymethyl)-2-(2-phenylethoxy)oxan-3-yl]oxyoxane-3,4,5-triol	2.71	level2			434.201	226.9	POS	C19H28O10				Shikimates and Phenylpropanoids	Phenylethanoids (C6-C2)	Phenylethanoids	CGZNTHDUAFIKOH-BMVMOQKNSA-N	0.00915696	0.00381771	0.0041325	0.00570239	0.0119348	0.0129991	0.0124675	0.0124671	1.1256	0.0182913	0.0505489	2.1863	1.12849
1500	mangiferin	2.71	level2			423.089	198.1	POS	C19H18O11				Shikimates and Phenylpropanoids	Xanthones	Plant xanthones	AEDDIBAIWPIIBD-XQOGOWKJSA-N	0.0865714	0.0990664	0.0907318	0.0921232	0.11081	0.105499	0.108152	0.108153	1.19065	0.015771	0.0453171	1.17401	0.231444
1502	Pterosin B	2.71	level2			219.137	155.2	POS	C14H18O2				Terpenoids	Sesquiterpenoids	Illudalane sesquiterpenoids	SJNCSXMTBXDZQA-SECBINFHSA-N	0.0167408	0.0105422	0.0125893	0.0132908	0.0526525	0.0524098	0.0457824	0.0502816	1.3125	0.000216672	0.00277065	3.7832	1.91961
1504	Dehydrosalsolidine	2.71	level2			206.117	114.1	POS	C12H15NO2				Alkaloids	Tyrosine alkaloids	Isoquinoline alkaloids	VASUQTGZAPZKFK-UHFFFAOYSA-N	0.0565313	0.0577977	0.0547283	0.0563525	0.0261703	0.0244474	0.0250963	0.025238	1.3389	6.94675e-06	0.000558708	0.44786	-1.15888
1505	2-Hydroxyquinoline	2.71	level2			146.06	63.5	POS	C9H7NO				Alkaloids	Tryptophan alkaloids	Quinoline alkaloids	LISFMEBWQUVKPJ-UHFFFAOYSA-N	0.0199467	0.0199739	0.0213348	0.0204185	0.00731643	0.00704598	0.00582146	0.00672796	1.32979	2.98951e-05	0.00101504	0.329503	-1.60163
1513	2-Naphthalenecarboxylic acid, 1-[2-(3-furanyl)ethyl]-1,2,3,4,4a,7,8,8a-octahydro-1,4a,5-trimethyl-, (1R,2R,4aR,8aR)-	2.7	level2			317.21	454.8	POS	C20H28O3				Terpenoids	Diterpenoids	Colensane and Clerodane diterpenoids	KQFDQVMJLKUUDA-ZULIPRJHSA-N	0.0363756	0.0469908	0.0449643	0.0427769	0.142453	0.10998	0.146418	0.132951	1.31173	0.00167437	0.00965367	3.108	1.63598
1514	alpha-Cyperone	2.7	level2			219.174	419.5	POS	C15H22O	HMDB0037061	473-08-5		Terpenoids	Sesquiterpenoids	Eudesmane sesquiterpenoids	KUFXJZXMWHNCEH-UHFFFAOYSA-N	0.0446817	0.0239856	0.0222397	0.0303023	0.153327	0.150307	0.1395	0.147711	1.29429	0.000147779	0.00224196	4.87458	2.28528
1515	Cuscohygrine	2.7	level2			225.196	281.7	POS	C13H24N2O	HMDB0030290	454-14-8	C06521	Alkaloids	Ornithine alkaloids	Pyrrolidine alkaloids	ZEBIACKKLGVLFZ-UHFFFAOYSA-N	0.0834831	0.128362	0.0579722	0.0899391	0.245833	0.491492	0.488211	0.408512	1.2339	0.0191572	0.0522972	4.5421	2.18336
1516	3,4-Dihydrocoumarin	2.7	level2			149.059	252.7	POS	C9H8O2	HMDB0036626	119-84-6	C02274	Shikimates and Phenylpropanoids			VMUXSMXIQBNMGZ-UHFFFAOYSA-N	0.0111853	0.0100029	0.0112452	0.0108112	0.0284028	0.0281595	0.0272603	0.0279408	1.33669	5.59763e-06	0.000523115	2.58444	1.36985
1518	Nicotyrine	2.7	level2			159.091	208.6	POS	C10H10N2	HMDB0255591		C10161	Alkaloids	Nicotinic acid alkaloids	Pyridine alkaloids	RYFOJXFXERAMLS-UHFFFAOYSA-N	0.0757176	0.0698064	0.0740845	0.0732028	0.173894	0.162368	0.158075	0.164779	1.33574	5.40007e-05	0.00133916	2.25099	1.17056
1519	2-Propylpyridine	2.7	level2			122.096	122.9	POS	C8H11N	HMDB0032497	622-39-9		Alkaloids	Nicotinic acid alkaloids	Pyridine alkaloids	OIALIKXMLIAOSN-UHFFFAOYSA-N	0.13264	0.127367	0.116624	0.125544	0.219919	0.207219	0.196422	0.207853	1.31585	0.000571191	0.00487273	1.65563	0.727379
1521	Betonicine	2.7	level2			160.096	44.3	POS	C7H13NO3	HMDB0029412	515-25-3	C08269				MUNWAHDYFVYIKH-RITPCOANSA-N	0.499945	0.486778	0.498834	0.495185	0.916887	0.900806	0.89396	0.903884	1.3405	8.77267e-07	0.000274248	1.82535	0.868169
1523	N-Nitrosopyrrolidine (NPYR)	2.7	level2			101.071	650.7	POS	C4H8N2O	HMDB0031642	930-55-2	C19285	Alkaloids	Lysine alkaloids	Piperidine alkaloids	WNYADZVDBIBLJJ-UHFFFAOYSA-N	0.0235312	0.0206752	0.0216297	0.0219454	0.0244066	0.0270092	0.028068	0.0264946	1.15108	0.02963	0.072573	1.2073	0.271782
1526	7-(2-hydroxypropan-2-yl)-1,4a-dimethyl-2,3,4,5,6,7,8,8a-octahydronaphthalen-1-ol	2.7	level2			239.201	541.5	NEG	C15H28O2				Terpenoids	Sesquiterpenoids	Eudesmane sesquiterpenoids	LKKDASYGWYYFIK-UHFFFAOYSA-N	1.81222	1.94365	2.00495	1.92028	2.31676	2.35784	2.32796	2.33419	1.28153	0.00205991	0.0110529	1.21555	0.281606
1531	13-OxoODE	2.7	level2			317.208	470.8	POS	C18H30O3	HMDB0004668		C14765	Fatty acids	Fatty Acids and Conjugates	Oxo fatty acids	JHXAZBBVQSRKJR-BSZOFBHHSA-N	0.0291297	0.0256993	0.0282659	0.0276983	0.0330682	0.0373037	0.0415184	0.0372968	1.19296	0.0222607	0.0584458	1.34654	0.429255
1535	Diosgenin	2.7	level2			415.32	368.6	POS	C27H42O3				Terpenoids	Steroids	Spirostane steroids	WQLVFSAGQJTQCK-VKROHFNGSA-N	0.0159363	0.00281348	0.0209925	0.0132474	0.0903953	0.0915265	0.0837404	0.088554	1.16392	0.000222472	0.0028082	6.68462	2.74085
1536	Hexose + C13H19O (isomer of 1061)	2.7	level2			415.197	337	NEG	C19H30O7				Terpenoids	Apocarotenoids	Megastigmanes	SZOPSAFLRCYJCX-UHFFFAOYSA-N	0.0375409	0.0419883	0.0752014	0.0515768	0.243743	0.12796	0.186635	0.186113	1.22738	0.0192269	0.052439	3.60845	1.85138
1537	Phenylethyl 2-Glucoside	2.7	level2			283.118	265	NEG	C14H20O6				Shikimates and Phenylpropanoids	Phenylethanoids (C6-C2)	Phenylethanoids	MLRIJUWUQTVDQE-RKQHYHRCSA-N	0.0407299	0.0572824	0.0650066	0.0543396	0.281966	0.241275	0.236466	0.253236	1.31697	0.000247383	0.00296003	4.66024	2.2204
1538	Carbendazim	2.7	level2			192.076	258.7	POS	C9H9N3O2	HMDB0031769	10605-21-7	C10897	Alkaloids	Anthranilic acid alkaloids	Phenazine alkaloids	TWFZGCMQGLPBSX-UHFFFAOYSA-N	2.64276	2.82623	2.89327	2.78742	0.032345	0.0414782	0.0230121	0.0322784	1.33744	0.000698469	0.00551643	0.01158	-6.43222
1539	Ibuprofen	2.7	level2			207.137	257.2	POS	C13H18O2	HMDB0001925	15687-27-1	C01588				HEFNNWSXXWATRW-UHFFFAOYSA-N	0.275182	0.29565	0.291147	0.287326	0.165211	0.169631	0.162404	0.165749	1.33581	4.97778e-05	0.00128538	0.576866	-0.793691
1540	Isoliquiritin	2.7	level2			441.115	250.5	POS	C21H22O9				Shikimates and Phenylpropanoids	Flavonoids	Chalcones	YNWXJFQOCHMPCK-LXGDFETPSA-N	0.0152561	0.011782	0.0144972	0.0138451	0.0169739	0.0212438	0.0244663	0.0208947	1.12377	0.0431566	0.0965299	1.50917	0.593759
1542	Myricitrin	2.7	level2			487.088	235.2	POS	C21H20O12				Shikimates and Phenylpropanoids	Flavonoids	Flavonols	DCYOADKBABEMIQ-OWMUPTOHSA-N	0.0406513	0.0375189	0.0387301	0.0389667	0.050482	0.0509719	0.0478397	0.0497646	1.30166	0.00126392	0.00805658	1.2771	0.352876
1543	(R)-Campholenic_aldehyde	2.7	level2			153.127	217.6	POS	C10H16O	HMDB0034973			Terpenoids	Monoterpenoids		OGCGGWYLHSJRFY-UHFFFAOYSA-N	0.0250567	0.0287058	0.0267717	0.0268448	0.0385381	0.0377005	0.0350645	0.037101	1.2853	0.00230738	0.0119077	1.38206	0.466818
1546	Tetradecanedioic acid	2.7	level2			239.165	431.1	NEG	C14H26O4	HMDB0000872	821-38-5		Fatty acids	Fatty Acids and Conjugates	Dicarboxylic acids	HQHCYKULIHKCEB-UHFFFAOYSA-N	0.0829294	0.0951358	0.139857	0.105974	0.204145	0.184124	0.208034	0.198768	1.20263	0.00787402	0.0274797	1.87562	0.907369
1547	1-Methyl-6-oxo-1,6-dihydropyridine-3-carboxylic acid	2.7	level2			154.049	57.2	POS	C7H6O2		3719-45-7					RGZCKPXTNJAWMR-UHFFFAOYSA-N	0.00678786	0.00666938	0.00643706	0.00663143	0.0108428	0.0124279	0.00997741	0.0110827	1.29925	0.0231223	0.0600833	1.67124	0.740919
1548	L-Arginine	2.7	level2			175.119	585	POS	C30H48O5	HMDB0000517	74-79-3	C00062	Amino acids and Peptides	Small peptides	Aminoacids	ODKSFYDXXFIFQN-BYPYZUCNSA-N	1.86495	1.87446	1.8466	1.862	2.6071	2.81336	2.32643	2.5823	1.2698	0.0359168	0.0839633	1.38684	0.471798
1550	6-Deoxyfagomine	2.7	level2			132.102	421.9	POS	C6H13NO2	HMDB0036382	197449-09-5		Alkaloids	Lysine alkaloids		RMJCALHKIHCSMY-UHFFFAOYSA-N	0.02914	0.0274352	0.0284143	0.0283298	0.0422277	0.0397845	0.0370817	0.039698	1.3024	0.00191252	0.010532	1.40128	0.486744
1551	SCOPOLINE	2.7	level2			156.101	405.8	POS	C8H13NO2				Alkaloids	Ornithine alkaloids	Tropane alkaloids	MEGPURSNXMUDAE-IKTQEEBSSA-N	0.0627304	0.042447	0.0455779	0.0502517	0.145299	0.153256	0.143928	0.147494	1.30938	0.000150736	0.00226789	2.93511	1.55341
1552	HYDRASTININE	2.7	level2			208.096	361.1	POS	C11H13NO3				Alkaloids	Tyrosine alkaloids	Isoquinoline alkaloids	YOJQZPVUNUQTDF-UHFFFAOYSA-N	0.00932237	0.00907422	0.00749206	0.00862955	0.0192447	0.0188932	0.0184315	0.0188565	1.32089	7.89546e-05	0.0016215	2.1851	1.1277
1553	Ginkgolide C	2.7	level2			441.14	275.5	POS	C20H24O11	HMDB0036860	15291-76-6	C07603	Terpenoids	Sesquiterpenoids	Picrotoxane sesquiterpenoids	AMOGMTLMADGEOQ-UHFFFAOYSA-N	0.00146189	0.000775973	0.00102381	0.00108722	0.00418594	0.00433811	0.00456064	0.00436156	1.29822	0.00013695	0.0021528	4.01166	2.0042
1556	ORSELLINIC ACID, ETHYL ESTER	2.7	level2			197.08	177.6	POS	C10H12O4				Shikimates and Phenylpropanoids	Phenolic acids (C6-C1)	Shikimic acids and derivatives	UQSRXQMIXSZGLA-UHFFFAOYSA-N	0.00838895	0.00632369	0.00803966	0.0075841	0.0156205	0.0137812	0.0140957	0.0144991	1.28675	0.00126648	0.00806669	1.91178	0.934916
1557	Cis-Zeatin-riboside	2.7	level2			352.161	146.2	POS	C15H21N5O5				Alkaloids	Pseudoalkaloids	Purine alkaloids	GOSWTRUMMSCNCW-BAJUWZQUSA-N	0.00383989	0.00242135	0.00321524	0.00315883	0.0131477	0.0122712	0.00739691	0.0109386	1.25927	0.0132751	0.0399926	3.46287	1.79197
1560	Feruloyl O-methyldopamine	2.7	level2			344.148	99.5	POS	C19H21NO5				Shikimates and Phenylpropanoids	Phenylpropanoids (C6-C3)	Cinnamic acid amides	ACSWAJLDOHJFNA-UHFFFAOYSA-N	0.0317421	0.0238309	0.0264578	0.0273436	0.0166138	0.0192193	0.0218329	0.019222	1.12223	0.0427995	0.095914	0.702979	-0.508446
1561	Nigellicine	2.7	level2			247.107	69.2	POS	C13H14N2O3	HMDB0030269	98063-20-8		Alkaloids			FEJTUHSIRAJLOJ-UHFFFAOYSA-N	0.0136673	0.0164316	0.0144814	0.0148601	0.110257	0.104101	0.0895886	0.101316	1.33662	0.00440175	0.0183525	6.81794	2.76934
1562	9-Azabicyclo[3.3.1]nonan-3-one	2.7	level2			140.107	44.6	POS	C8H13NO	HMDB0029613	4390-39-0		Alkaloids	Lysine alkaloids	Quinolizidine alkaloids	JIYPUEZSSJAXBO-UHFFFAOYSA-N	0.00865449	0.00994331	0.00971114	0.00943632	0.0141194	0.0155163	0.0131039	0.0142465	1.27948	0.00392211	0.0169577	1.50975	0.594314
1563	1,8-Heptadecadiene-4,6-diyne-3,10-diol	2.7	level2			261.184	33.9	POS	C17H24O2	HMDB0038781	63910-76-9					DSVMWGREWREVQQ-QINSGFPZSA-N	0.0834762	0.0823525	0.0881441	0.0846576	0.00381265	0.00431261	0.00287031	0.00366519	1.33742	1.53447e-06	0.000327821	0.0432943	-4.52968
1564	Diosbulbin B	2.7	level2			367.109	483.6	POS	C19H20O6				Terpenoids	Diterpenoids	Colensane and Clerodane diterpenoids	QEANLIISUSNNDX-YHPVUIEZSA-N	0.00697865	0.00671792	0.00732286	0.00700648	0.00608843	0.00606183	0.00612882	0.00609302	1.26191	0.0335044	0.0796272	0.869627	-0.201531
1565	Pyridine	2.7	level2			80.0493	391.8	POS	C5H5N	HMDB0000926	110-86-1	C00747	Alkaloids	Nicotinic acid alkaloids	Pyridine alkaloids	JUJWROOIHBZHMG-UHFFFAOYSA-N	0.0311248	0.0292321	0.0307472	0.030368	0.0350014	0.0362089	0.0349157	0.0353753	1.28701	0.0021688	0.0114298	1.16489	0.220191
1567	Alpinetin Methyl Ether	2.7	level2			307.093	359.9	POS	C17H16O4	HMDB0341129			Shikimates and Phenylpropanoids	Flavonoids	Flavanones	IAFBOKYTDSDNHV-UHFFFAOYSA-N	0.00459846	0.00193161	0.00186829	0.00279946	0.00677327	0.0051548	0.00615021	0.00602609	1.09052	0.0336358	0.0798647	2.15259	1.10608
1568	Cyclopenta[c]pyran-4-carboxylic acid, 1-[(6-O-beta-D-glucopyranosyl-beta-D-glucopyranosyl)oxy]-1,4a,5,7a-tetrahydro-7-(hydroxymethyl)-, methyl ester, (1S,4aS,7aS)-	2.7	level2			573.178	279.5	POS	C23H34O15				Terpenoids	Monoterpenoids	Iridoids monoterpenoids	FYZYXYLPBWLLGI-AUOPOVQUSA-N	0.000316799	0.000315027	0.000380108	0.000337312	0.00128057	0.00122385	0.00187662	0.00146035	1.31387	0.0317332	0.0763922	4.32937	2.11416
1569	(3S,4R,4aS)-3-[(2S,3R,4S,5S,6R)-6-[[(2R,3R,4R)-3,4-dihydroxy-4-(hydroxymethyl)oxolan-2-yl]oxymethyl]-3,4,5-trihydroxyoxan-2-yl]oxy-4-ethenyl-4,4a,5,6-tetrahydro-3H-pyrano[3,4-c]pyran-8-one	2.7	level2			513.157	267.5	POS	C21H30O13				Terpenoids	Monoterpenoids	Secoiridoid monoterpenoids	JNPXCTROEJQHKD-APAPHXOESA-N	0.00593574	0.00413066	0.00426287	0.00477642	0.013459	0.0121699	0.0109245	0.0121845	1.29307	0.00136925	0.00848843	2.55096	1.35104
1570	Baicalin methyl ester	2.7	level2			483.089	254.9	POS	C22H20O11				Shikimates and Phenylpropanoids	Flavonoids	Flavones	AOWRAYJMTOYETH-SXFAUFNYSA-N	0.000239552	0.000131163	0.0002047	0.000191805	0.000683203	0.000813476	0.000509581	0.000668753	1.26288	0.00701513	0.0253234	3.48663	1.80183
1571	Pseudopelletierine	2.7	level2			154.122	225.8	POS	C9H15NO	HMDB0034580	552-70-5	C10865	Alkaloids	Lysine alkaloids	Piperidine alkaloids	RHWSKVCZXBAWLZ-UHFFFAOYSA-N	0.00963917	0.0168555	0.0106637	0.0123861	0.102751	0.113984	0.105705	0.10748	1.32493	1.94617e-05	0.000844605	8.67743	3.11727
1572	Angustifoline	2.7	level2			235.18	219.4	POS	C14H22N2O				Alkaloids	Lysine alkaloids	Quinolizidine alkaloids	VTIPIBIDDZPDAV-IFWUJCSASA-N	0.00466338	0.00444659	0.00494648	0.00468548	0.00767229	0.0069016	0.0064543	0.0070094	1.28664	0.0037629	0.0164895	1.49598	0.581092
1573	4,7,8-trimethoxy-3,5-dimethylchromen-2-one [IIN-based	2.7	level2			265.106	181.6	POS	C14H16O5				Polyketides	Cyclic polyketides		PKKTXAMCHLIVDS-UHFFFAOYSA-N	0.00127078	0.000922307	0.000701598	0.000964896	0.0118062	0.0125179	0.00923029	0.0111848	1.32518	0.000541577	0.00471575	11.5917	3.53502
1577	(+)-Costunolide	2.7	level2			233.153	151.9	POS	C15H20O2				Terpenoids	Sesquiterpenoids	Germacrane sesquiterpenoids	HRYLQFBHBWLLLL-AHNJNIBGSA-N	0.003624	0.00411756	0.00394092	0.00389416	0.0209945	0.0141451	0.0137475	0.0162957	1.31508	0.0337215	0.0800075	4.18465	2.06511
1579	2,2,6,6-Tetramethyl-4-piperidinone	2.7	level2			156.138	75.1	POS	C9H17NO	HMDB0031179	826-36-8		Alkaloids	Lysine alkaloids	Piperidine alkaloids	JWUXJYZVKZKLTJ-UHFFFAOYSA-N	0.0116195	0.0111879	0.0127541	0.0118538	0.0200933	0.0174752	0.0155947	0.0177211	1.23786	0.0133207	0.0400852	1.49497	0.580113
1580	Coumestrol	2.7	level2			267.046	51.9	NEG	C15H8O5	HMDB0002326	479-13-0	C10205	Shikimates and Phenylpropanoids	Isoflavonoids	Coumestan	ZZIALNLLNHEQPJ-UHFFFAOYSA-N	0.0942923	0.0820043	0.0932056	0.089834	0.201138	0.209354	0.193034	0.201175	1.33114	5.41528e-05	0.00134066	2.23941	1.16312
1582	Valnoctamide	2.7	level2			144.138	237.4	POS	C8H17NO	HMDB0259753	4171-13-5	D02717				QRCJOCOSPZMDJY-UHFFFAOYSA-N	0.078902	0.0480871	0.0565783	0.0611891	0.308103	0.220756	0.212631	0.247163	1.29579	0.00431887	0.0181107	4.03933	2.01412
1583	bis[[4-[(2S,3R,4S,5S,6R)-3,4,5-trihydroxy-6-(hydroxymethyl)tetrahydropyran-2-yl]oxyphenyl]methyl] (2R)-2-[(2S,3R,4S,5S,6R)-6-(acetoxymethyl)-3,4,5-trihydroxy-tetrahydropyran-2-yl]oxy-2-isobutyl-butanedioate	2.7	level2			913.335	145.1	POS	C42H58O23		899430-03-6		Terpenoids			MHVQDAOKYCPBQU-PCBDRJNGSA-N	0.0035479	0.000629722	0.00150621	0.00189461	0.0116988	0.0160686	0.00827913	0.0120155	1.18897	0.0137832	0.0410831	6.34194	2.66492
1587	Irisresorcinol	2.69	level2			347.293	537.2	POS	C23H38O2	HMDB0038532	52483-21-3		Polyketides	Aromatic polyketides	Catechols with side chains	VBBLHZOJAWSCSP-BQYQJAHWSA-N	0.117815	0.117568	0.140058	0.125147	0.00384277	0.00430554	0.00357818	0.00390883	1.34009	0.0037375	0.0164167	0.031234	-5.00074
1591	Avocadienofuran	2.69	level2			247.205	412.2	POS	C17H26O	HMDB0030926	34227-08-2		Fatty acids			MGNABOKOTWYILU-OWBHPGMISA-N	0.0116622	0.0138565	0.011165	0.0122279	0.0246545	0.0265835	0.0257221	0.0256534	1.31905	0.000176287	0.00247274	2.09794	1.06897
1592	FA 18:5+2O	2.69	level2			305.175	372.5	NEG	C18H26O4				Fatty acids	Octadecanoids	Other Octadecanoids	PQPRTPXWQQQKJC-UHFFFAOYSA-N	0.0266366	0.0333054	0.0305549	0.0301656	0.0425698	0.0451275	0.0438183	0.0438386	1.26416	0.00272763	0.0132977	1.45326	0.539295
1593	Boschniakine	2.69	level2			162.091	319.1	POS	C10H11NO	HMDB0030267	18070-40-1	C09915	Alkaloids	Nicotinic acid alkaloids	Pyridine alkaloids	OPRAONAUWNNOOV-UHFFFAOYSA-N	0.00664762	0.00608671	0.0036661	0.00546681	0.0265097	0.0214438	0.0249697	0.0243077	1.29908	0.00042806	0.00407517	4.44642	2.15264
1594	gamma-Thujaplicin	2.69	level2			165.09	280.8	POS	C10H12O2				Terpenoids	Monoterpenoids	Monocyclic monoterpenoids	WKEWHSLZDDZONF-UHFFFAOYSA-N	0.0654874	0.0662495	0.0690819	0.0669396	0.0621152	0.0561544	0.0541263	0.0574653	1.16395	0.0228518	0.0595593	0.858465	-0.220169
1596	5-Hydroxyconiferaldehyde	2.69	level2			195.065	120.5	POS	C10H10O4				Shikimates and Phenylpropanoids	Phenylpropanoids (C6-C3)	Cinnamic acids and derivatives	IEHPLRVWOHZKCS-NSCUHMNNSA-N	0.0172992	0.0163105	0.0146365	0.0160821	0.0317574	0.0313309	0.0286907	0.030593	1.32013	0.000299586	0.00330124	1.90231	0.927751
1597	Ephedroxane	2.69	level2			192.101	102.5	POS	C11H13NO2				Alkaloids			MNYARIILPGRTQL-WPRPVWTQSA-N	0.0193979	0.0177839	0.0178817	0.0183545	0.190058	0.178847	0.164019	0.177641	1.34013	0.00214362	0.011344	9.67836	3.27476
1598	FRIEDELIN	2.69	level2			427.392	622.8	POS	C30H50O				Terpenoids	Triterpenoids	Friedelane triterpenoids	OFMXGFHWLZPCFL-SVRPQWSVSA-N	0.00415241	0.00283528	0.0030256	0.00333777	0.00095519	0.000783533	0.00110883	0.000949185	1.30256	0.00478659	0.0194487	0.284378	-1.81412
1601	Nandrolone	2.69	level2			275.2	467.5	POS	C18H26O2	HMDB0002725	434-22-0	C07254	Terpenoids	Steroids	Estrane steroids	NPAGDVCDWIYMMC-IZPLOLCNSA-N	0.108838	0.1205	0.113642	0.114327	0.0952446	0.0856697	0.0866785	0.0891976	1.26273	0.0052373	0.0207076	0.780199	-0.358086
1603	Hyoscyamine	2.69	level2			290.174	354.3	POS	C17H23NO3	HMDB0014568	101-31-5	C02046				RKUNBYITZUJHSG-FXUDXRNXSA-N	0.00830616	0.00857267	0.00848679	0.0084552	0.0120695	0.0112904	0.0116744	0.0116781	1.32963	0.000172764	0.00244387	1.38117	0.465894
1604	Santonin	2.69	level2			247.132	333.5	POS	C15H18O3				Terpenoids	Sesquiterpenoids	Eudesmane sesquiterpenoids	XJHDMGJURBVLLE-BOCCBSBMSA-N	0.0254065	0.0254929	0.026823	0.0259075	0.0359448	0.0371104	0.0366389	0.0365647	1.33273	4.8135e-05	0.00126469	1.41136	0.497084
1605	Huperzine B	2.69	level2			279.141	319	POS	C16H20N2O				Alkaloids	Pseudoalkaloids	Terpenoid alkaloids	YYWGABLTRMRUIT-HWWQOWPSSA-N	0.0110456	0.0136563	0.013919	0.0128737	2.40351e-06	2.44445e-06	2.394e-06	2.41399e-06	1.34131	0.00503899	0.0201634	0.000187514	-12.3807
1606	Specnuezhenide	2.69	level2			687.252	278.9	POS	C31H42O17				Terpenoids	Monoterpenoids	Secoiridoid monoterpenoids	STKUCSFEBXPTAY-XFQLMFQHSA-N	0.0406397	0.0295111	0.0330573	0.0344027	0.143892	0.153932	0.164408	0.154077	1.32955	6.02126e-05	0.00140517	4.47863	2.16306
1608	EPICATECHIN_MONOGALLATE	2.69	level2			443.098	250.5	POS	C22H18O10	HMDB0037944	1257-08-5		Shikimates and Phenylpropanoids	Flavonoids	Flavan-3-ols	LSHVYAFMTMFKBA-TZIWHRDSSA-N	0.000903084	0.000367838	0.000526218	0.000599047	0.0017799	0.00109414	0.00145439	0.00144281	1.12957	0.0292601	0.0718686	2.40851	1.26814
1611	Isosilybin A	2.69	level2			481.112	237.1	NEG	C25H22O10				Shikimates and Phenylpropanoids	Flavonoids	Flavonolignans	FDQAOULAVFHKBX-HKTJVKLFSA-N	0.0550111	0.061501	0.0537765	0.0567629	0.0426578	0.0379446	0.0408603	0.0404876	1.27837	0.00414476	0.0176234	0.713275	-0.487469
1614	(-)-Podophyllotoxin	2.69	level2			459.128	218.6	NEG	C22H22O8	HMDB0246672			Shikimates and Phenylpropanoids	Lignans	Arylnaphthalene and aryltetralin lignans	YJGVMLPVUAXIQN-UHFFFAOYSA-N	0.0990626	0.0890393	0.0945028	0.0942016	0.073164	0.078157	0.0763623	0.0758944	1.27068	0.00485748	0.0196437	0.80566	-0.311757
1615	leonurine	2.69	level2			334.139	201.8	POS	C14H21N3O5	HMDB0254014		C16985	Shikimates and Phenylpropanoids	Phenolic acids (C6-C1)	Simple phenolic acids	WNGSUWLDMZFYNZ-UHFFFAOYSA-N	0.00864829	0.00854342	0.00789009	0.0083606	0.0107933	0.0113883	0.0102061	0.0107959	1.27262	0.0042335	0.0178643	1.29129	0.368809
1616	PHENYLETHANOLAMINE	2.69	level2			120.08	106.5	POS	C8H11NO	HMDB0001065	7568-93-6	C02735	Alkaloids	Tyrosine alkaloids	Phenylethylamines	ULSIYEODSMZIPX-UHFFFAOYSA-N	1.18638	1.10034	1.16955	1.15209	2.06501	1.95842	1.83839	1.95394	1.32566	0.000341794	0.00356647	1.696	0.762135
1617	ACARBOSE	2.69	level2			646.253	46.3	POS	C25H43NO18	HMDB0014429	56180-94-0	C06802	Carbohydrates	Saccharides	Polysaccharides	XUFXOAAUWZOOIT-JMPDRRIHSA-N	0.127106	0.136826	0.120805	0.128246	0.0743953	0.0655072	0.0717798	0.0705608	1.32153	0.000420853	0.00403583	0.5502	-0.861972
1619	(-)-Hydroxycitric acid lactone	2.69	level2			189.004	60.9	NEG	C6H6O7		27750-13-6		Amino acids and Peptides	Small peptides	Aminoacids	PFHZIWAVXDSFTB-CVYQJGLWSA-N	0.0475311	0.0559591	0.0423357	0.0486086	0.132466	0.12075	0.123402	0.125539	1.32048	0.000133274	0.00212239	2.58265	1.36885
1622	L-trans-5-Hydroxy-2-piperidinecarboxylic_acid	2.69	level2			146.081	300.2	POS	C6H11NO3	HMDB0029426	50439-45-7		Amino acids and Peptides	Small peptides	Aminoacids	RKEYKDXXZCICFZ-UHFFFAOYSA-N	0.00498738	0.0049146	0.00373445	0.00454548	0.00923146	0.00811975	0.00742463	0.00825861	1.25545	0.00503547	0.0201532	1.81689	0.861468
1624	Myrtine	2.69	level2			168.138	229.3	POS	C10H17NO	HMDB0030371	66835-10-7		Alkaloids	Lysine alkaloids	Quinolizidine alkaloids	GDQCWCOVKFXWMP-UHFFFAOYSA-N	0.0308744	0.0243535	0.0305324	0.0285868	0.0884427	0.0847273	0.137664	0.103611	1.29379	0.0460959	0.101437	3.62445	1.85776
1626	N-Hexadecanoylpyrrolidine	2.69	level2			310.31	188.2	POS	C20H39NO	HMDB0032740	70974-48-0		Fatty acids	Fatty amides	N-acyl amines	ULDNZNZTSYZQKK-UHFFFAOYSA-N	9.76628e-05	0.00020317	0.000198331	0.000166388	0.000670217	0.000602775	0.000527352	0.000600114	1.25567	0.00127803	0.00811761	3.60672	1.85069
1628	4-(Butoxymethyl)phenol	2.69	level2			181.122	35.1	POS	C11H16O2	HMDB0039957	57726-27-9					GGPCJIKQXDNJJY-UHFFFAOYSA-N	0.0240013	0.0258853	0.0207148	0.0235338	0.00758425	0.00812978	0.00688265	0.00753223	1.32778	0.000500868	0.00449176	0.32006	-1.64359
1631	Isopimpinellin	2.69	level2			269.039	363.2	POS	C13H10O5	HMDB0034312	482-27-9	C02162	Shikimates and Phenylpropanoids	Coumarins	Furocoumarins	DFMAXQKDIGCMTL-UHFFFAOYSA-N	0.00340176	0.00303932	0.00325977	0.00323362	0.00627273	0.00649007	0.00592232	0.00622837	1.33052	0.000107322	0.0018979	1.92613	0.945706
1634	Schisandrin C	2.69	level2			407.152	319.4	POS	C22H24O6				Shikimates and Phenylpropanoids	Lignans	Dibenzocyclooctadienes lignans	HTBWBWWADZJXID-TXEJJXNPSA-N	0.000442782	0.000159915	0.000981717	0.000528138	0.0055885	0.00811482	0.00613132	0.00661155	1.2503	0.00164118	0.00952754	12.5186	3.646
1635	Piperidine	2.69	level2			86.0962	296.1	POS	C5H11N	HMDB0034301	110-89-4	C01746	Alkaloids	Lysine alkaloids	Piperidine alkaloids	NQRYJNQNLNOLGT-UHFFFAOYSA-N	0.281073	0.25632	0.277838	0.271744	0.47493	0.497679	0.419388	0.463999	1.31023	0.00142802	0.0087157	1.70749	0.771874
1638	Chelidonine	2.69	level2			354.129	149.7	POS	C20H19NO5				Alkaloids	Tyrosine alkaloids	Isoquinoline alkaloids	GHKISGDRQRSCII-ZOCIIQOWSA-N	0.126483	0.129199	0.135904	0.130529	0.00586416	0.00586652	0.00543343	0.00572137	1.34121	0.000487709	0.00441717	0.0438322	-4.51186
1639	skullcapflavone II	2.69	level2			373.092	77.2	NEG	C19H18O8	HMDB0258335		C10183	Shikimates and Phenylpropanoids	Flavonoids	Flavones	GMQFOKBGMKVUQZ-UHFFFAOYSA-N	0.601476	0.545093	0.603176	0.583248	0.514416	0.459292	0.513607	0.495772	1.14315	0.0295565	0.0724304	0.850018	-0.234434
1640	Meglumine	2.69	level2			178.107	457.6	POS	C7H17NO5	HMDB0240291	6284-40-8	D01796	Carbohydrates	Aminosugars and aminoglycosides	Aminosugars	MBBZMMPHUWSWHV-BDVNFPICSA-N	0.181078	0.159936	0.180139	0.173718	0.263828	0.293196	0.25476	0.270595	1.29718	0.00199408	0.0108202	1.55767	0.639389
1641	m-Tyramine (hydrobromide)	2.69	level2			138.091	166	POS	C8H11NO	HMDB0004989	588-05-6		Alkaloids	Tyrosine alkaloids	Phenylethylamines	GHFGJTVYMNRGBY-UHFFFAOYSA-N	0.00920124	0.00508357	0.0103419	0.00820889	0.0141854	0.0164662	0.0138466	0.0148327	1.09103	0.0210677	0.0560925	1.80691	0.853526
1642	PC(38:8)	2.69	level2			802.535	163.4	POS	C46H76NO8P	HMDB0008182			Fatty acids	Glycerophospholipids	Glycerophosphocholines	UBBIRFHXFUMSPL-YQOXYQOZSA-N	0.00915915	0.00894495	0.0095647	0.00922293	0.0164216	0.0164766	0.0158648	0.0162543	1.33706	1.23299e-05	0.000694761	1.76238	0.817527
1644	Trigoforin	2.68	level2			189.09	607.5	POS	C12H12O2	HMDB0029495	14002-93-8		Shikimates and Phenylpropanoids	Coumarins	Simple coumarins	KAFSSZHADPCOBG-UHFFFAOYSA-N	0.0225114	0.0253213	0.0433808	0.0304045	0.00128084	0.00178271	0.00168818	0.00158391	1.32567	0.0477395	0.104136	0.0520946	-4.26272
1645	cis-Parinaric_Acid_methyl_ester	2.68	level2			291.231	538	POS	C19H30O2				Fatty acids	Fatty Acids and Conjugates	Unsaturated fatty acids	JOSZZTLGHRSLOI-CXSCBKOLSA-N	0.00632524	0.00538011	0.00577506	0.0058268	0.00493146	0.00508154	0.00432022	0.00477774	1.10475	0.0433625	0.0968782	0.819959	-0.286377
1646	6'-Hydroxysiphonaxanthin	2.68	level2			617.418	504.1	POS	C40H56O5				Terpenoids	Carotenoids (C40)	Carotenoids (C40, β-ε)	YQJDYMVGIAROMZ-SLYFCCOISA-N	0.00606482	0.00913688	0.0110542	0.00875195	0.00219359	0.00220532	0.00166316	0.00202069	1.29279	0.0417597	0.0941408	0.230885	-2.11476
1647	Di-dihydrocaffeoyl spermidine	2.68	level2			474.26	454.8	POS	C25H35N3O6				Alkaloids	Ornithine alkaloids	Polyamines	RNEHQZRKZJSYOL-UHFFFAOYSA-N	0.00187224	0.00275863	0.00247714	0.00236934	0.0109745	0.0072252	0.00744326	0.00854764	1.29226	0.00764591	0.0269031	3.60761	1.85104
1651	9-oxo-nonanoic_acid	2.68	level2			173.117	393	POS	C9H16O3	HMDB0094711		C16322	Fatty acids	Fatty Acids and Conjugates	Oxo fatty acids	WLGDDELKYAWBBL-UHFFFAOYSA-N	0.0668514	0.0782613	0.0742672	0.0731267	0.0392473	0.0390425	0.034848	0.0377126	1.31958	0.000623121	0.00514195	0.515716	-0.955351
1652	Solanidine base + 2O	2.68	level2			430.334	388.2	POS	C27H43NO3				Alkaloids	Pseudoalkaloids	Steroidal alkaloids	SUXOAOUIWWNLHR-UHFFFAOYSA-N	0.0166498	0.0169788	0.0124886	0.0153724	0.210743	0.232519	0.218076	0.220446	1.33762	6.23303e-06	0.000538024	14.3404	3.84201
1653	(3S,4S,6R,7S)-1,10-Bisaboladiene-3,4-diol	2.68	level2			239.2	369.3	POS	C15H26O2	HMDB0031383	129673-87-6		Terpenoids	Sesquiterpenoids	Bisabolane sesquiterpenoids	YRFJMOGROZTYPC-UHFFFAOYSA-N	0.00291384	0.00309444	0.00399802	0.00333544	0.0118621	0.0144824	0.0115191	0.0126212	1.32019	0.000731385	0.00568773	3.78398	1.9199
1657	Vasicinol	2.68	level2			205.096	208.4	POS	C11H12N2O2				Alkaloids	Anthranilic acid alkaloids	Quinazoline alkaloids	WEFMOGRHGUPGMA-JTQLQIEISA-N	2.58142	2.46158	2.5775	2.54017	6.17469	5.70308	5.58397	5.82058	1.3368	5.89146e-05	0.00139171	2.29142	1.19624
1658	Calystegin_B2	2.68	level2			176.091	43.8	POS	C7H13NO4	HMDB0038594	127414-85-1	C10851	Alkaloids	Ornithine alkaloids	Tropane alkaloids	FXFBVZOJVHCEDO-UHFFFAOYSA-N	0.262055	0.258077	0.256575	0.258903	0.703299	0.684179	0.676246	0.687908	1.341	7.96436e-07	0.000261096	2.65702	1.40981
1662	Hecogenin	2.68	level2			431.311	516.7	POS	C27H42O4				Terpenoids	Steroids	Spirostane steroids	QOLRLLFJMZLYQJ-LOBDNJQFSA-N	0.0030296	0.0026265	0.00328851	0.00298154	0.00426464	0.00393621	0.00376054	0.00398713	1.19314	0.0143453	0.0422895	1.33727	0.419295
1663	N-(2-furylmethyl)-9H-purin-6-amine	2.68	level2			238.071	515.4	POS	C10H9N5O	HMDB0012245	525-79-1	C08272	Alkaloids	Pseudoalkaloids	Purine alkaloids	QANMHLXAZMSUEX-UHFFFAOYSA-N	0.00816046	0.00879525	0.0088415	0.00859907	0.00516352	0.00538997	0.00476337	0.00510562	1.32224	0.000258095	0.00303738	0.593741	-0.752094
1664	delta-Tocotrienol	2.68	level2			397.309	514.9	POS	C27H40O2				Terpenoids	Meroterpenoids	Prenyl quinone meroterpenoids	ODADKLYLWWCHNB-QRCIITMISA-N	0.0352075	0.0330476	0.0425342	0.0369298	0.00643691	0.00726181	0.00703103	0.00690992	1.3348	0.00864483	0.0293761	0.18711	-2.41804
1665	(9Z,12Z)-N-(3-Methoxybenzyl)octadeca-9,12-dienamide	2.68	level2			422.302	474.8	POS	C26H41NO2				Fatty acids	Fatty amides	N-acyl amines	BMQBTHWVNBJSPS-NQLNTKRDSA-N	0.000554965	0.000781426	0.000700548	0.00067898	0.00128539	0.00124331	0.0011352	0.0012213	1.26186	0.00246504	0.0124346	1.79872	0.846974
1666	3,3'-Di-O-methylellagic acid	2.68	level2			353.021	441.6	POS	C16H10O8				Shikimates and Phenylpropanoids	Phenolic acids (C6-C1)	Gallotannins	KLAGYIBJNXLDTL-UHFFFAOYSA-N	0.15696	0.200348	0.169044	0.175451	0.0159785	0.0161617	0.0155457	0.0158953	1.33897	0.00649297	0.0240252	0.0905972	-3.46439
1668	GLYCEROL-MYRISTATE	2.68	level2			325.236	434.8	POS	C17H34O4	HMDB0304951			Fatty acids	Glycerolipids	Monoacylglycerols	DCBSHORRWZKAKO-UHFFFAOYSA-N	0.041116	0.0520398	0.040451	0.0445356	0.0301602	0.03146	0.0279514	0.0298572	1.22347	0.0196144	0.0532365	0.670412	-0.576881
1672	Dipropyl phthalate	2.68	level2			249.113	361.6	NEG	C14H18O4				Shikimates and Phenylpropanoids	Phenolic acids (C6-C1)	Shikimic acids and derivatives	MQHNKCZKNAJROC-UHFFFAOYSA-N	0.0236322	0.0242243	0.0253531	0.0244032	0.317833	0.396691	0.381594	0.365372	1.33972	0.00497041	0.0199644	14.9723	3.90423
1673	(E)-Resveratroloside	2.68	level2			405.119	354.9	NEG	C20H22O9				Shikimates and Phenylpropanoids	Stilbenoids	Monomeric stilbenes	OLCVEOSSVCAFGR-CUYWLFDKSA-N	0.00976518	0.00929711	0.00800902	0.00902377	0.0133961	0.0136896	0.0157069	0.0142642	1.27075	0.00426637	0.0179608	1.58074	0.660598
1677	[3,4,5-trihydroxy-6-(hydroxymethyl)oxan-2-yl] 9-(hydroxymethyl)-2,2,6a,6b,9,12a-hexamethyl-10-[3,4,5-trihydroxy-6-[(3,4,5-trihydroxy-6-methyloxan-2-yl)oxymethyl]oxan-2-yl]oxy-1,3,4,5,6,6a,7,8,8a,10,11,12,13,14b-tetradecahydropicene-4a-carboxylate	2.68	level2			310.093	222	NEG	C14H17NO7							HVSMXONXCJBJIF-RKQHYHRCSA-N	0.0676415	0.0768733	0.0724505	0.0723218	0.105395	0.0999209	0.100749	0.102022	1.30593	0.000717248	0.00561218	1.41066	0.496372
1678	Secoxyloganin	2.68	level2			427.119	88.2	POS	C17H24O11				Terpenoids	Monoterpenoids	Secoiridoid monoterpenoids	MQLSOVRLZHTATK-PEYNGXJCSA-N	0.00419526	0.00375909	0.00448403	0.00414613	0.0071375	0.00620327	0.00564854	0.00632977	1.24301	0.0106391	0.0340589	1.52667	0.610389
1680	Sedoheptulose	2.68	level2			209.066	56.6	NEG	C7H14O7	HMDB0254327			Carbohydrates	Saccharides	Monosaccharides	HSNZZMHEPUFJNZ-UHFFFAOYSA-N	0.0988456	0.111314	0.0978604	0.102673	0.20894	0.211681	0.217956	0.212859	1.33232	2.68523e-05	0.000967627	2.07317	1.05184
1681	Bergenin	2.68	level2			327.072	46.8	NEG	C14H16O9				Shikimates and Phenylpropanoids	Coumarins	Isocoumarins	YWJXCIXBAKGUKZ-HJJNZUOJSA-N	0.0445749	0.0536277	0.0532591	0.0504872	0.124245	0.112655	0.109736	0.115546	1.32201	0.000258141	0.00303766	2.28861	1.19447
1684	Methylgallate	2.68	level2			183.03	64.7	NEG	C6H13NO3	HMDB0254590	99-24-1		Shikimates and Phenylpropanoids	Phenolic acids (C6-C1)	Simple phenolic acids	FBSFWRHWHYMIOG-UHFFFAOYSA-N	0.114179	0.105331	0.130376	0.116628	0.0765131	0.0979751	0.0807793	0.0850891	1.14238	0.0327239	0.0782019	0.729574	-0.454873
1685	Montecristin	2.68	level2			575.502	170.3	POS	C37H66O4	HMDB0029795	185336-15-6		Polyketides	Linear polyketides	Acetogenins	ULFROYYCMRNCTL-ACNZRUBCSA-N	0.00374363	0.00286861	0.00251468	0.00304231	0.00583028	0.00499809	0.00460129	0.00514322	1.19528	0.0150398	0.0437679	1.69057	0.757506
1687	Phenylacetic acid + 2O, O-Hex	2.68	level2			329.087	20.6	NEG	C14H18O9				Shikimates and Phenylpropanoids	Phenolic acids (C6-C1)	Simple phenolic acids	MVFYXXNAFZRZAM-UHFFFAOYSA-N	0.132131	0.159368	0.128251	0.139917	0.0534925	0.0482864	0.0457544	0.0491777	1.3252	0.000834023	0.00615364	0.351479	-1.50849
1688	Genipin	2.68	level2			249.071	431.2	POS	C11H14O5				Terpenoids	Monoterpenoids	Iridoids monoterpenoids	AZKVWQKMDGGDSV-BCMRRPTOSA-N	0.00348476	0.00277846	0.00332599	0.0031964	0.010009	0.0100099	0.00885392	0.00962428	1.32754	0.00012841	0.00207768	3.01097	1.59023
1689	N-Nitrosomorpholine	2.68	level2			117.066	382.5	POS	C4H8N2O2	HMDB0255208		C19283				ZKXDGKXYMTYWTB-UHFFFAOYSA-N	0.0445886	0.0443124	0.0441146	0.0443385	0.02216	0.0233219	0.021286	0.022256	1.33741	3.3745e-06	0.000432677	0.501956	-0.994368
1691	Apiin	2.68	level2			563.176	312.7	NEG	C26H28O14				Shikimates and Phenylpropanoids	Flavonoids	Flavones	NTDLXWMIWOECHG-YRCFQSNFSA-N	0.00134233	0.00113785	0.000860295	0.00111349	0.0023783	0.00357833	0.00260096	0.00285253	1.25412	0.0115796	0.0362399	2.56179	1.35715
1692	convolicine	2.68	level2			356.151	295.5	POS	C18H23NO5							HZEOENYXYFFKIU-QDMKHBRRSA-N	0.00184746	0.00195841	0.00269136	0.00216575	0.00813584	0.00925772	0.00758542	0.00832633	1.31733	0.000384694	0.00382315	3.84456	1.94282
1696	3-[(3aS,8R,8aR)-8-hydroxy-6,8-dimethyl-3-methylidene-2-oxo-3a,4,5,8a-tetrahydrocyclohepta[b]furan-7-yl]propanoic acid	2.68	level2			279.123	145.4	NEG	C15H20O5				Terpenoids	Sesquiterpenoids	Guaiane sesquiterpenoids	PPUVIGSDWLRHCY-PSOPSSQASA-N	0.6255	0.798219	0.78099	0.734903	0.175736	0.197496	0.184862	0.186031	1.3312	0.00916162	0.0306325	0.253137	-1.98201
1697	Di-n-pentyl_phthalate	2.68	level2			307.19	73.1	POS	C18H26O4	HMDB0251441		C14300	Shikimates and Phenylpropanoids	Phenolic acids (C6-C1)	Simple phenolic acids	IPKKHRVROFYTEK-UHFFFAOYSA-N	0.0220672	0.0308365	0.0244192	0.0257743	0.0162216	0.0172938	0.0156917	0.0164024	1.21566	0.0244546	0.0626618	0.636386	-0.652027
1699	Abieta-8(14),9(11),12-triene-7,18-diol	2.68	level2			325.215	34.5	POS	C20H30O2				Terpenoids	Diterpenoids	Abietane diterpenoids	PORHOKHIMOFMMH-UHFFFAOYSA-N	0.00472271	0.00446592	0.00541863	0.00486909	0.00681569	0.00909012	0.00871982	0.00820854	1.24073	0.0117398	0.0366049	1.68585	0.753475
1707	6-Butyltetrahydro-2H-pyran-2-one	2.67	level2			157.122	400.3	POS	C9H16O2	HMDB0031514	3301-94-8		Fatty acids	Fatty esters	Lactones	PXRBWNLUQYZAAX-UHFFFAOYSA-N	0.00971321	0.0107346	0.0129204	0.0111227	0.0147637	0.0141284	0.0137505	0.0142142	1.10694	0.0355501	0.0833119	1.27794	0.353822
1708	Solasodine base + O-Hex-Hex-Hex-Pen	2.67	level2			1032.53	336.6	POS	C50H81NO21	HMDB0032002	157604-98-3		Alkaloids	Pseudoalkaloids	Steroidal alkaloids	BYMOGFTUZUEFHY-UHFFFAOYSA-N	0.0123713	0.0118807	0.0114229	0.0118916	0.045896	0.0490351	0.041053	0.045328	1.33681	0.00434023	0.0181741	3.81176	1.93046
1710	Tercatain	2.67	level2			787.1	48.4	POS	C34H26O22	HMDB0039263	103744-87-2		Shikimates and Phenylpropanoids	Phenolic acids (C6-C1)	Gallotannins	NALYUPYCMXELRP-UHFFFAOYSA-N	0.00894862	0.0100355	0.0100876	0.00969056	0.0262749	0.0290409	0.0254565	0.0269241	1.33374	0.000114043	0.00195743	2.77838	1.47425
1711	UVAOL	2.67	level2			443.387	570	POS	C30H50O2	HMDB0002391	545-46-0		Terpenoids	Triterpenoids	Ursane and Taraxastane triterpenoids	XUARCIYIVXVTAE-ZAPOICBTSA-N	0.0214881	0.0142434	0.0253179	0.0203498	0.0459575	0.0488036	0.0513259	0.0486957	1.25082	0.00140405	0.00862394	2.39293	1.25878
1713	Gingerol	2.67	level2			295.19	435.5	POS	C17H26O4	HMDB0005783	58253-27-3	C10462				NLDDIKRKFXEWBK-UHFFFAOYSA-N	0.00896536	0.0105692	0.00991683	0.00981712	0.178627	0.220758	0.268286	0.222557	1.33712	0.0144747	0.0425627	22.6703	4.50273
1718	pongamol	2.67	level2			295.101	283.3	POS	C18H14O4	HMDB0253968			Shikimates and Phenylpropanoids	Flavonoids	Chalcones	XTLSKKJNOIMMBK-UHFFFAOYSA-N	1.01167	1.07854	0.712357	0.934189	2.04373	1.91606	1.82556	1.92845	1.26258	0.00153182	0.00911728	2.0643	1.04566
1720	Osajin	2.67	level2			405.168	246.7	POS	C25H24O5				Shikimates and Phenylpropanoids	Isoflavonoids	Isoflavones	DCTLJGWMHPGCOS-UHFFFAOYSA-N	0.00773848	0.0072746	0.00812382	0.0077123	0.00550407	0.00614173	0.00544477	0.00569686	1.27376	0.00370802	0.0163282	0.738672	-0.436995
1722	methyl (4S,5E,6S)-5-ethylidene-4-[2-oxo-2-[(2S,3R,4S,5S,6R)-3,4,5-trihydroxy-6-(hydroxymethyl)oxan-2-yl]oxyethyl]-6-[(2S,3R,4S,5S,6R)-3,4,5-trihydroxy-6-(hydroxymethyl)oxan-2-yl]oxy-4H-pyran-3-carboxylate	2.67	level2			565.177	219.1	NEG	C23H34O16				Terpenoids	Monoterpenoids	Secoiridoid monoterpenoids	QYTFUUGRKFACBM-MHESFOKOSA-N	0.079751	0.0843581	0.0842069	0.082772	0.206949	0.210573	0.201434	0.206319	1.33992	2.23896e-06	0.000373425	2.49261	1.31766
1724	6-Demethoxytangeretin	2.67	level2			365.104	45.8	POS	C19H18O6	HMDB0302157			Shikimates and Phenylpropanoids	Flavonoids	Flavones	DDGJUTBQQURRGE-UHFFFAOYSA-N	1.28871	1.3388	1.34571	1.32441	4.39329	4.4816	4.15908	4.34466	1.34024	6.57444e-06	0.000549057	3.28045	1.7139
1725	Cyromazine	2.67	level2			167.105	112	POS	C11H15N5O5	HMDB0029862	66215-27-8	C14147	Alkaloids			LVQDKIWDGQRHTE-UHFFFAOYSA-N	0.004451	0.00360857	0.00437855	0.00414604	0.0430368	0.0400643	0.0388781	0.0406598	1.33865	8.59938e-06	0.000604465	9.80689	3.2938
1726	(2S)-4-Hydroxy-3-oxo-3,4-dihydro-2H-1,4-benzoxazin-2-yl beta-D-glucopyranoside	2.67	level2			366.08	330.4	POS	C14H17NO9							OUSLYTBGQGKTME-PUOUXSMHSA-N	0.0079659	0.00611702	0.00595335	0.00667876	0.0117332	0.0114899	0.0117807	0.0116679	1.27433	0.0149158	0.0435039	1.74702	0.804896
1727	Feruloyl putrescine (isomer of 1178)	2.67	level2			265.154	297.4	POS	C14H20N2O3				Alkaloids	Ornithine alkaloids	Polyamines	SFUVCMKSYKHYLD-UHFFFAOYSA-N	0.025326	0.0181863	0.0223272	0.0219465	0.083967	0.0701849	0.0630748	0.0724089	1.31176	0.00146016	0.00884146	3.29934	1.72218
1728	CYCLOPENTANONE	2.67	level2			102.091	277.1	POS	C5H8O	HMDB0031407	120-92-3	C00557				BGTOWKSIORTVQH-UHFFFAOYSA-N	0.0124093	0.0123079	0.0173141	0.0140104	0.0294447	0.0328839	0.0309826	0.0311037	1.2888	0.000894638	0.0064478	2.22004	1.15059
1733	7-O-Methylbaicalein	2.67	level2			285.069	419.2	POS	C16H12O5				Shikimates and Phenylpropanoids	Flavonoids	Flavones	ZTHLHHDJRXJGRX-UHFFFAOYSA-N	0.00573846	0.00451581	0.00525387	0.00516938	0.0089243	0.00996497	0.00836945	0.00908624	1.28306	0.00262852	0.0129675	1.7577	0.813691
1734	beta-Alaninebetaine	2.67	level2			132.101	354.3	POS	C6H13NO2	HMDB0304538		C08263				ACZVSMNFVFBOTM-UHFFFAOYSA-N	0.0706097	0.0664564	0.0722279	0.0697646	0.167246	0.162566	0.153505	0.161105	1.33667	3.13641e-05	0.00103794	2.30927	1.20744
1735	osmanthuside H	2.67	level2			431.155	260.2	NEG	C19H28O11				Shikimates and Phenylpropanoids	Phenylethanoids (C6-C2)	Phenylethanoids	IVRQZYXJBVMHCW-OTCFHACESA-N	0.219734	0.169447	0.212302	0.200494	0.132351	0.125407	0.111464	0.123074	1.24727	0.0100332	0.0326816	0.613853	-0.704034
1737	Ouabain	2.67	level2			585.293	133.2	POS	C29H44O12	HMDB0015224	630-60-4	C01443	Terpenoids	Steroids	Cardenolides	LPMXVESGRSUGHW-HBYQJFLCSA-N	0.030039	0.0336943	0.0312511	0.0316615	0.0518221	0.051559	0.0462537	0.0498783	1.31019	0.000986963	0.00687342	1.57536	0.655683
1738	9-OxoOTrE	2.67	level2			293.211	95.4	POS	C18H28O3				Fatty acids	Octadecanoids	Other Octadecanoids	ACHDMUPTZYZIGR-CUHSZNQNSA-N	0.103862	0.114595	0.110599	0.109685	0.0399469	0.0333457	0.0363719	0.0365548	1.3339	3.73097e-05	0.00112461	0.33327	-1.58524
1739	Epimedoside A	2.67	level2			663.231	42.4	POS	C32H38O15				Shikimates and Phenylpropanoids	Flavonoids	Flavonols	OGYXOOJUJQIDOX-FVCAYHPDSA-N	0.015166	0.0105826	0.0133437	0.0130308	0.0347592	0.0311685	0.0296559	0.0318612	1.29956	0.000731855	0.00568895	2.44507	1.28988
1742	Squamocin_L	2.66	level2			607.491	605	POS	C37H66O6	HMDB0030940	98767-45-4		Polyketides	Linear polyketides	Acetogenins	URLVCROWVOSNPT-UHFFFAOYSA-N	0.0293454	0.0274675	0.0287025	0.0285051	0.0156154	0.0177328	0.0130578	0.0154687	1.28679	0.000868873	0.00632486	0.542664	-0.881869
1743	(1S,2S,3aR,4S,5S,6E,9R,11R,12E,13aS)-4,9,11-Triacetoxy-3a-hydroxy-2,5,8,8,12-pentamethyl-2,3,3a,4,5,8,9,10,11,13a-decahydro-1H-cyclopenta[12]annulen-1-yl benzoate	2.66	level2			607.29	546.6	POS	C33H44O9				Terpenoids	Diterpenoids	Jatrophane diterpenoids	BRVXVMOWTHQKHC-LKCWGRRXSA-N	0.0553165	0.0569605	0.0569013	0.0563927	0.0204635	0.0221816	0.0179071	0.0201841	1.3314	1.16071e-05	0.000679614	0.35792	-1.48229
1747	Panaxacol	2.66	level2			279.195	371.2	POS	C17H26O3	HMDB0039251	106828-96-0					VNLATJUGAZKQEH-UHFFFAOYSA-N	0.0139451	0.0134885	0.0144798	0.0139711	0.00597088	0.00722124	0.0065118	0.00656797	1.32545	8.84265e-05	0.00171393	0.470111	-1.08893
1749	Delcorine	2.66	level2			480.295	358.2	POS	C26H41NO7				Alkaloids	Pseudoalkaloids	Terpenoid alkaloids	XTLROSDJDZHIIK-FQCWPTJPSA-N	0.0782074	0.0860623	0.0789323	0.0810673	0.12958	0.122344	0.110652	0.120859	1.29262	0.00277794	0.0134625	1.49084	0.576127
1753	Celastrol	2.66	level2			473.265	518.7	POS	C29H38O4	HMDB0002385	34157-83-0		Terpenoids	Triterpenoids		KQJSQWZMSAGSHN-JJWQIEBTSA-N	0.000955542	0.000639513	0.00135514	0.000983399	0.00214181	0.00188164	0.00187733	0.00196693	1.14963	0.0119135	0.0369998	2.00013	1.0001
1757	(Z)-5-[(1S,2R,4aR,8aR)-5-(hydroxymethyl)-1,2,4a-trimethyl-2,3,4,7,8,8a-hexahydronaphthalen-1-yl]-3-(hydroxymethyl)pent-2-enoic acid	2.66	level2			359.228	263.1	POS	C20H32O4				Terpenoids	Diterpenoids	Colensane and Clerodane diterpenoids	LRLROPFPFABQRF-CBYQQGIISA-N	0.0266716	0.0221613	0.0230333	0.0239554	0.0886319	0.0923562	0.0648703	0.0819528	1.31438	0.00265206	0.0130461	3.42106	1.77444
1758	CATECHIN_PENTAACETATE	2.66	level2			501.14	257.8	POS	C25H24O11				Shikimates and Phenylpropanoids	Flavonoids	Flavan-3-ols	BKYWAYNSDFXIPL-JWQCQUIFSA-N	0.0107887	0.0125973	0.0122437	0.0118766	0.00526741	0.00464382	0.00411372	0.00467498	1.31956	0.000368658	0.00373384	0.393631	-1.34508
1759	Breviscapine	2.66	level2			485.073	244.3	POS	C21H18O12				Shikimates and Phenylpropanoids	Flavonoids	Flavones	DJSISFGPUUYILV-ZFORQUDYSA-N	0.00756844	0.00799027	0.00849169	0.0080168	0.0051684	0.00468916	0.00444326	0.00476694	1.31241	0.000679765	0.00542477	0.594619	-0.749963
1760	Acetylcimigenol arabinoside	2.66	level2			685.386	229.8	POS	C37H58O10				Terpenoids	Triterpenoids	Cycloartane triterpenoids	IHEJMZHKJYHVFF-NETQQFODSA-N	0.000242092	0.000390194	0.000542552	0.000391612	0.0049216	0.00518839	0.0047321	0.00494736	1.31975	8.66286e-06	0.000606415	12.6333	3.65916
1761	2-[(2S,3S,4S)-3-[(1S)-1-acetyloxyethyl]-5-methoxycarbonyl-2-[(2S,3R,4S,5S,6R)-3,4,5-trihydroxy-6-(hydroxymethyl)oxan-2-yl]oxy-3,4-dihydro-2H-pyran-4-yl]acetic acid	2.66	level2			463.145	118.7	NEG	C19H28O13				Terpenoids	Monoterpenoids	Secoiridoid monoterpenoids	OPKOYMHTMXJHRG-GUDQPSSMSA-N	0.0125574	0.00960136	0.0110485	0.0110691	0.0213505	0.0156523	0.0158582	0.0176204	1.17248	0.0331277	0.0789426	1.59186	0.67071
1763	6'',6''-Dimethyl-3',4'-methylenedioxypyrano[2'',3'':7,8]flavone	2.66	level2			349.108	43.8	POS	C21H16O5				Shikimates and Phenylpropanoids	Flavonoids	Flavones	VTEDSEHLMNTMAV-UHFFFAOYSA-N	0.0547089	0.0454556	0.0512244	0.0504629	0.0623492	0.0632296	0.0629167	0.0628318	1.20462	0.0433181	0.0968116	1.24511	0.316271
1767	Timosaponin B III	2.66	level2			903.492	341	POS	C45H74O18		139051-27-7		Terpenoids	Steroids	Furostane steroids	ROHLIYKWVMBBFX-GFMVILKCSA-N	0.00591002	0.00597958	0.00608586	0.00599182	0.00213566	0.00308319	0.00268811	0.00263565	1.29843	0.000275729	0.00314713	0.439875	-1.18483
1769	N-Methyl-1-deoxynojirimycin	2.66	level2			178.107	482.6	POS	C7H15NO4	HMDB0035360	69567-10-8		Alkaloids			AAKDPDFZMNYDLR-UHFFFAOYSA-N	0.0315707	0.0384105	0.0344252	0.0348021	0.0745595	0.0774033	0.0900678	0.0806768	1.31733	0.000886378	0.00640722	2.31816	1.21298
1770	(2E)-3-[3-(beta-D-Glucopyranosyloxy)-4-hydroxyphenyl]acrylic acid	2.66	level2			365.084	334.8	POS	C15H18O9	HMDB0303040		C10431	Shikimates and Phenylpropanoids	Phenylpropanoids (C6-C3)	Cinnamic acids and derivatives	QOPSZFXPZWQLOG-VHCZEJTMSA-N	0.0128682	0.0115068	0.0120347	0.0121365	0.0267557	0.0264313	0.0254623	0.0262164	1.33575	1.43332e-05	0.000741784	2.16012	1.11111
1771	Dehydroaporheine	2.66	level2			278.116	317.3	POS	C18H15NO2	HMDB0033355	36285-03-7		Alkaloids	Tyrosine alkaloids	Aporphine alkaloids	YUWBTKIVDAWQHK-UHFFFAOYSA-N	0.00212622	0.00141351	0.00168077	0.00174017	0.0024572	0.00292518	0.00249289	0.00262509	1.14046	0.0260782	0.0658142	1.50853	0.593144
1772	Solasodiene (not validated)	2.66	level2			396.325	310.5	POS	C27H41NO	HMDB0302982			Alkaloids	Pseudoalkaloids	Steroidal alkaloids	OYNIUJOJEWHJPN-UHFFFAOYSA-N	2.18929e-06	0.000237232	2.21181e-06	8.05442e-05	0.00257062	0.00311729	0.00281405	0.00283398	1.172	9.85166e-05	0.00181614	35.1854	5.13691
1779	Forsythoside E	2.66	level2			463.178	278.6	POS	C20H30O12				Shikimates and Phenylpropanoids	Phenylethanoids (C6-C2)	Phenylethanoids	QIMGUQIHCNDUKU-OJJLXHDHSA-N	0.00493076	0.00383341	0.00469064	0.00448493	0.0324855	0.0315039	0.026309	0.0300995	1.33396	0.000192037	0.00259748	6.71124	2.74658
1783	Octinoxate	2.66	level2			291.195	52.5	POS	C18H26O3	HMDB0030762	24393-56-4	C10476	Shikimates and Phenylpropanoids	Phenylpropanoids (C6-C3)	Cinnamic acids and derivatives	DHNGCHLFKUPGPX-RMKNXTFCSA-N	0.0294437	0.0352192	0.0327598	0.0324742	0.0160632	0.0161915	0.0157433	0.0159993	1.32671	0.00980545	0.0321538	0.492678	-1.02128
1784	11-hydroxy-9-(hydroxymethyl)-2-methoxycarbonyl-2,6a,6b,9,12a-pentamethyl-10-(3,4,5-trihydroxyoxan-2-yl)oxy-1,3,4,5,6,6a,7,8,8a,10,11,12,13,14b-tetradecahydropicene-4a-carboxylic acid	2.66	level2			663.378	24	NEG	C36H56O11	HMDB0034636	60820-94-2		Terpenoids	Triterpenoids	Oleanane triterpenoids	SFZVDNKTWPZIJG-UHFFFAOYSA-N	0.0163104	0.0231276	0.022582	0.0206734	0.0131612	0.0139091	0.00882287	0.0119644	1.12033	0.0321611	0.0771817	0.578734	-0.789028
1787	methyl (2S)-5-oxopyrrolidine-2-carboxylate	2.66	level2			144.065	88.8	POS	C6H9NO3		4931-66-2		Amino acids and Peptides	Small peptides	Aminoacids	HQGPKMSGXAUKHT-BYPYZUCNSA-N	0.0144681	0.0139651	0.014346	0.0142598	0.0191786	0.0196672	0.0204683	0.0197714	1.32976	0.0001693	0.00241684	1.38651	0.471462
1788	[2-Hydroxy-3-[hydroxy-(2,3,4,5,6-pentahydroxycyclohexyl)oxyphosphoryl]oxypropyl] octadeca-9,12-dienoate	2.66	level2			595.288	263.7	NEG	C27H49O12P				Fatty acids	Glycerophospholipids	Glycerophosphoinositols	SAHCQBPGXQFTRA-UHFFFAOYSA-N	0.647729	0.613275	0.637492	0.632832	0.924559	0.911579	0.82068	0.885606	1.30313	0.00179437	0.010107	1.39943	0.484842
1790	1-Heptadecene-4,6-diyne-3,9-diol	2.65	level2			263.2	508.1	POS	C17H26O2	HMDB0038782	77084-19-6					WNSUMUNACHNURC-UHFFFAOYSA-N	0.00824148	0.00868352	0.00801774	0.00831425	0.0143168	0.0130434	0.0122446	0.0132016	1.30965	0.0015269	0.00909997	1.58783	0.667054
1792	Putative_Alantolactone	2.65	level2			233.153	293.1	POS	C15H20O2	HMDB0035906	546-43-0	C09289	Terpenoids	Sesquiterpenoids	Eudesmane sesquiterpenoids	PXOYOCNNSUAQNS-UHFFFAOYSA-N	0.0199897	0.0194238	0.0162776	0.0185637	0.100055	0.0754712	0.073009	0.0828451	1.32463	0.0162132	0.0462474	4.46276	2.15793
1793	Hasubanonine	2.65	level2			374.198	289.1	POS	C21H27NO5				Alkaloids	Tyrosine alkaloids	Hasubanan alkaloids	DXUSNRCTWFHYFS-LEWJYISDSA-N	0.0361522	0.0245812	0.033005	0.0312461	0.253393	0.242956	0.22393	0.240093	1.33204	2.31932e-05	0.00090606	7.68393	2.94184
1794	Acrimarine_J	2.65	level2			596.226	244.6	POS	C35H33NO8	HMDB0040386	147395-90-2		Alkaloids	Anthranilic acid alkaloids	Acridone alkaloids	ZWXOIPZATSFFPY-UHFFFAOYSA-N	0.0315386	0.0339158	0.0309507	0.032135	0.076924	0.0594879	0.0523977	0.0629365	1.26495	0.0497003	0.107396	1.9585	0.96975
1798	7-methyl-3-methylidene-6-(3-oxobutyl)-4,7,8,8a-tetrahydro-3aH-cyclohepta[b]furan-2-one	2.65	level2			247.133	387.3	NEG	C15H20O3	HMDB0256134			Terpenoids	Sesquiterpenoids	Germacrane sesquiterpenoids	AVFIYMSJDDGDBQ-UHFFFAOYSA-N	0.0103728	0.0167224	0.0142469	0.0137807	0.207788	0.22053	0.217706	0.215342	1.3346	1.2193e-06	0.000304487	15.6263	3.9659
1799	Liquiritin	2.65	level2			417.119	302.7	NEG	C21H22O9	HMDB0029520	551-15-5		Shikimates and Phenylpropanoids	Flavonoids	Flavanones	DEMKZLAVQYISIA-UHFFFAOYSA-N	0.0161247	0.0209655	0.0209357	0.019342	0.0337509	0.0346635	0.0312675	0.0332273	1.27091	0.00187176	0.0103885	1.71789	0.780637
1801	3,5,6,7,8,3',4'-Heptamethoxyflavone	2.65	level2			455.135	272.4	POS	C22H24O9	HMDB0037689	1178-24-1		Shikimates and Phenylpropanoids	Flavonoids	Flavonols	SSXJHQZOHUYEGD-UHFFFAOYSA-N	0.00169781	0.00170437	0.0018279	0.00174336	0.00520013	0.00559935	0.0050784	0.00529263	1.33845	2.62713e-05	0.000959229	3.03587	1.60211
1804	geniposidic acid	2.65	level2			373.113	123.3	NEG	C16H22O10				Terpenoids	Monoterpenoids	Iridoids monoterpenoids	ZJDOESGVOWAULF-OGJQONSISA-N	0.0465828	0.0489137	0.0455038	0.0470001	0.0863939	0.0775323	0.0762334	0.0800532	1.32288	0.000590114	0.00497104	1.70326	0.768296
1805	roemerine	2.65	level2			280.128	122.3	POS	C18H17NO2				Alkaloids	Tyrosine alkaloids	Aporphine alkaloids	JCTYWRARKVGOBK-CQSZACIVSA-N	0.0516893	0.0451186	0.0461988	0.0476689	0.0605022	0.0577963	0.0570073	0.0584353	1.22542	0.00934176	0.0310722	1.22586	0.29379
1807	Stigmasterol	2.65	level2			413.377	659.5	POS	C29H48O	HMDB0000937	83-48-7	C05442	Terpenoids	Steroids	Cholestane steroids	HCXVJBMSMIARIN-PHZDYDNGSA-N	0.00602524	0.00760236	0.00761025	0.00707928	0.0141631	0.0136486	0.0207661	0.0161926	1.25354	0.0179062	0.0497568	2.28733	1.19366
1808	Bevirimat	2.65	level2			583.404	605.6	NEG	C36H56O6		174022-42-5		Terpenoids	Triterpenoids	Lupane triterpenoids	YJEJKUQEXFSVCJ-WRFMNRASSA-N	0.0462417	0.0738427	0.0598795	0.0599879	0.0236057	0.0212616	0.0148404	0.0199026	1.26471	0.00878124	0.0297061	0.331777	-1.59172
1811	Enicoflavine	2.65	level2			212.091	411.8	POS	C10H13NO4							GBJQPSBGSKNYHV-YVMONPNESA-N	0.0103412	0.0100112	0.0100634	0.0101386	0.0294753	0.0295275	0.0287592	0.029254	1.3411	2.32189e-07	0.000162974	2.8854	1.52877
1812	Eriosemaone_C	2.65	level2			531.204	276.2	POS	C31H30O8				Shikimates and Phenylpropanoids	Flavonoids	Flavanones	XFFLLCTVQRLAND-VWLOTQADSA-N	0.0035555	0.00223867	0.00310078	0.00296498	0.051802	0.0584993	0.0462942	0.0521985	1.33403	0.00469286	0.0191849	17.605	4.13791
1813	Murrayazolinol	2.65	level2			348.194	211.2	POS	C23H25NO2	HMDB0038827	125287-09-4		Alkaloids	Tryptophan alkaloids	Carbazole alkaloids	SIYXICWJEWHFMI-UHFFFAOYSA-N	0.00451104	0.00413608	0.00449944	0.00438219	0.014337	0.0149328	0.0156311	0.014967	1.33895	1.13781e-05	0.000676026	3.41541	1.77206
1814	Piperlotine A	2.65	level2			232.129	439.6	POS	C14H17NO2				Alkaloids	Lysine alkaloids	Piperidine alkaloids	JYEDISZKFNNREA-RMKNXTFCSA-N	0.0103671	0.00926805	0.0102009	0.00994534	0.0456184	0.0462932	0.0410126	0.0443081	1.3383	3.48764e-05	0.00109194	4.45516	2.15548
1815	METHYL GALACTOSIDE	2.65	level2			193.071	391.1	NEG	C7H14O6	HMDB0246173			Carbohydrates	Saccharides	Disaccharides	HOVAGTYPODGVJG-UHFFFAOYSA-N	0.043507	0.0409089	0.0460919	0.0435026	0.0682561	0.0734247	0.0657249	0.0691352	1.31443	0.000702082	0.00553301	1.58922	0.668321
1816	Alloimperatorin	2.65	level2			271.092	383.8	POS	C16H14O4	HMDB0301848		C09053	Shikimates and Phenylpropanoids	Coumarins	Simple coumarins	KDXVVZMYSLWJMA-UHFFFAOYSA-N	0.0257708	0.0275111	0.0263208	0.0265342	0.00896844	0.00967344	0.01069	0.00977728	1.33359	1.98182e-05	0.000851963	0.368478	-1.44035
1817	5,7-dihydroxy-2-(4-hydroxy-3-methoxyphenyl)-3,6-dimethoxychromen-4-one [IIN-based on	2.65	level2			383.076	364.3	POS	C18H16O8	HMDB0033819	10173-01-0		Shikimates and Phenylpropanoids	Flavonoids	Flavonols	XUWTZJRCCPNNJR-UHFFFAOYSA-N	0.0117958	0.0092479	0.0112316	0.0107584	0.0255452	0.0237954	0.0233668	0.0242358	1.31681	0.000189731	0.00258155	2.25272	1.17167
1818	Cornuside	2.65	level2			543.167	285.5	POS	C24H30O14				Terpenoids	Monoterpenoids	Secoiridoid monoterpenoids	SMTKSCGLXONVGL-UPIRYGIPSA-N	0.00381201	0.00217937	0.00232263	0.00277134	0.00795202	0.00764923	0.00888318	0.00816148	1.27449	0.00109184	0.00732552	2.94496	1.55825
1820	Methyl 2-{[6-O-(beta-D-xylopyranosyl)-beta-D-glucopyranosyl]oxy}benzoate	2.65	level2			464.175	216.2	POS	C19H26O12	HMDB0303042						VHUNCYDAXJGCLO-AHMNSWSSSA-N	0.0221028	0.0185963	0.0151989	0.0186327	0.0463653	0.0661788	0.0545714	0.0557052	1.29484	0.00366723	0.0162047	2.98965	1.57998
1822	[(2R,3S,4S,5R,6S)-6-(3,4-dihydroxybenzoyl)oxy-3,4,5-trihydroxy-tetrahydropyran-2-yl]methyl 3,4-dihydroxybenzoate	2.65	level2			451.089	49	NEG	C20H20O12				Shikimates and Phenylpropanoids	Phenolic acids (C6-C1)	Gallotannins	VNQNUULCMPXFER-XDCWJTEKSA-N	1.17468e-05	0.00130613	0.000769124	0.000695667	0.0113413	0.0100567	0.0120912	0.0111631	1.06463	0.000118315	0.00198762	16.0466	4.0042
1824	FA 18:4+1O	2.64	level2			293.21	376.2	POS	C18H28O3				Fatty acids	Octadecanoids	12-oxophytodienoic acid metabolites	PMTMAFAPLCGXGK-UHFFFAOYSA-N	0.435503	0.489985	0.449005	0.458165	0.293223	0.318035	0.249729	0.286996	1.27101	0.00268729	0.0131671	0.626403	-0.674837
1826	Sophoracoumestan_A	2.64	level2			335.094	45.9	POS	C20H14O5				Shikimates and Phenylpropanoids	Isoflavonoids	Coumestan	JOMJKDWBAPDZIF-UHFFFAOYSA-N	0.117083	0.119924	0.110223	0.115743	0.216887	0.217824	0.199231	0.211314	1.33086	0.000140128	0.00218189	1.82571	0.868457
1828	Cycloart-25-ene-3,24-diol	2.64	level2			425.377	581	POS	C30H50O2				Terpenoids	Triterpenoids	Cycloartane triterpenoids	MHGLNDDJLDJDBG-UHFFFAOYSA-N	0.0639006	0.0520429	0.0621157	0.0593531	0.0316771	0.0348617	0.0292403	0.0319264	1.29671	0.00244492	0.0123667	0.537906	-0.894573
1830	Soyasapogenol B base + O-HexA+HexA+dHex	2.64	level2			953.479	392	NEG	C48H74O19				Terpenoids	Triterpenoids	Oleanane triterpenoids	NWEOPKVXZATAQT-UHFFFAOYSA-N	0.0656782	0.0507569	0.0623416	0.0595922	0.032677	0.0222819	0.028457	0.0278053	1.26451	0.00426712	0.0179618	0.466593	-1.09976
1831	3-[(2S,3R,4S,5S,6R)-6-[[(2R,3R,4R)-3,4-dihydroxy-4-(hydroxymethyl)oxolan-2-yl]oxymethyl]-3,4,5-trihydroxyoxan-2-yl]oxy-2-methylpyran-4-one	2.64	level2			421.133	313.4	POS	C17H24O12				Polyketides			OXNYNKGAOAFFBD-AHZIVMAWSA-N	0.0221452	0.0348067	0.0293643	0.0287721	0.0731687	0.0509226	0.0501358	0.0580757	1.19296	0.0250934	0.0639049	2.01848	1.01327
1832	Laudanosine	2.64	level2			358.204	305.8	POS	C21H27NO4	HMDB0030213	2688-77-9		Alkaloids	Tyrosine alkaloids	Isoquinoline alkaloids	KGPAYJZAMGEDIQ-UHFFFAOYSA-N	0.0383049	0.0365447	0.0356881	0.0368459	0.512404	0.495818	0.445222	0.484481	1.34061	0.00200538	0.0108574	13.1488	3.71686
1833	harpagoside	2.64	level2			517.171	302.5	POS	C24H30O11				Terpenoids	Monoterpenoids	Iridoids monoterpenoids	KVRQGMOSZKPBNS-FMHLWDFHSA-N	0.00212416	0.00174463	0.00179237	0.00188705	0.0195795	0.0199588	0.0165172	0.0186852	1.33778	0.00382917	0.0166868	9.90176	3.30769
1834	Tetrahydropalmatin	2.64	level2			356.188	278.9	POS	C21H25NO4				Alkaloids	Tyrosine alkaloids	Isoquinoline alkaloids	AEQDJSLRWYMAQI-QGZVFWFLSA-N	0.0242195	0.0242559	0.0258353	0.0247702	0.724442	0.743032	0.664901	0.710791	1.34114	0.00117188	0.00765833	28.6954	4.84275
1835	Licoflavone B	2.64	level2			413.173	259.5	POS	C25H26O4				Shikimates and Phenylpropanoids	Flavonoids	Flavones	GLDVIKFETPAZNV-UHFFFAOYSA-N	0.0192693	0.0166314	0.0179577	0.0179528	0.0632309	0.0619681	0.0757678	0.0669889	1.33235	0.00039227	0.00386416	3.73139	1.89971
1836	Calycosin-7-O-beta-D-glucoside	2.64	level2			469.114	248.6	POS	C22H22O10				Shikimates and Phenylpropanoids	Isoflavonoids	Isoflavones	WACBUPFEGWUGPB-MIUGBVLSSA-N	0.0126828	0.0132914	0.0130863	0.0130202	0.0692589	0.0780607	0.0670458	0.0714551	1.33946	0.00322566	0.0148618	5.48803	2.45629
1837	Ginkgolide A	2.64	level2			426.175	246.6	POS	C20H24O9	HMDB0036862	15291-75-5		Terpenoids	Sesquiterpenoids	Prezizaane sesquiterpenoids	FPUXKXIZEIDQKW-UHFFFAOYSA-N	0.0181858	0.0155694	0.0190618	0.0176057	0.0260144	0.0246137	0.0239561	0.0248614	1.25449	0.00391466	0.0169342	1.41212	0.497866
1838	Physagulin_E	2.64	level2			707.327	245	POS	C36H50O14	HMDB0039693	148054-13-1		Terpenoids	Steroids	Ergostane steroids	FOBLFFYOXRPILL-UHFFFAOYSA-N	0.00172594	0.0014588	0.000836042	0.00134026	0.0668671	0.0319021	0.0547973	0.0511889	1.32216	0.0397212	0.0906065	38.1932	5.25524
1841	Galangin	2.64	level2			269.038	234.5	NEG	C15H10O5	HMDB0029521	548-83-4	C10044	Shikimates and Phenylpropanoids	Flavonoids	Flavonols	VCCRNZQBSJXYJD-UHFFFAOYSA-N	0.0373928	0.0405172	0.0373436	0.0384178	0.0914025	0.0931945	0.0909586	0.0918518	1.33884	1.80538e-06	0.000354178	2.39086	1.25753
1842	(2R)-3-(3,4-dihydroxyphenyl)-1-[2,4-dihydroxy-3-[(2S,3R,4R,5S,6R)-3,4,5-trihydroxy-6-(hydroxymethyl)oxan-2-yl]phenyl]-2-hydroxypropan-1-one	2.64	level2			451.124	232.5	NEG	C21H24O11				Shikimates and Phenylpropanoids	Flavonoids	Chalcones	LNVWGAALAQOWHF-IUOSPEFCSA-N	0.0485851	0.0542831	0.0516636	0.0515106	0.0965446	0.0997105	0.0824175	0.0928909	1.30807	0.00174671	0.00992371	1.80333	0.850667
1843	1,4a-dimethyl-9-oxo-7-propan-2-yl-3,4,10,10a-tetrahydro-2H-phenanthrene-1-carboxylic acid	2.64	level2			337.179	229	POS	C20H26O3				Terpenoids	Diterpenoids	Podocarpane diterpenoids	MSWJSDLNPCSSNW-UHFFFAOYSA-N	0.000782434	0.00244076	0.000653239	0.00129215	0.00862576	0.0086082	0.0105639	0.00926597	1.25037	0.00077788	0.005905	7.17099	2.84217
1845	Benzoic acid + 2O, O-Hex	2.64	level2			315.072	88	NEG	C13H16O9				Shikimates and Phenylpropanoids	Phenolic acids (C6-C1)	Simple phenolic acids	CBTFERBMQQAROP-UHFFFAOYSA-N	0.403141	0.401451	0.413236	0.405942	0.546839	0.50714	0.517023	0.523667	1.31718	0.00070557	0.00555271	1.29	0.367375
1846	Haplodimerine	2.64	level2			487.189	406.5	POS	C28H26N2O6				Alkaloids	Tryptophan alkaloids	Quinoline alkaloids	ZTSCGHFGGQONGE-XHFAZCCNSA-N	0.00369958	0.00455948	0.00407178	0.00411028	2.40351e-06	2.44445e-06	2.394e-06	2.41399e-06	1.34132	0.00365341	0.0161631	0.000587305	-10.7336
1847	Pyridoxine + O-Hex	2.64	level2			332.133	320.6	POS	C14H21NO8	HMDB0246884			Alkaloids	Nicotinic acid alkaloids	Pyridine alkaloids	MDLTWTOQCHCLSZ-UHFFFAOYSA-N	0.122174	0.110262	0.125355	0.119264	0.190626	0.230557	0.179394	0.200192	1.27377	0.00749763	0.0265412	1.67857	0.74723
1848	Gnididin	2.64	level2			649.299	247.5	POS	C37H44O10				Terpenoids	Diterpenoids	Daphnane diterpenoids	OBYWPUMYSJSSFH-YCCBJEBWSA-N	0.0127657	0.0121173	0.0129919	0.012625	0.00624981	0.00702911	0.00678293	0.00668728	1.33057	6.97479e-05	0.00151774	0.529686	-0.91679
1849	Acetylbrowniine	2.64	level2			510.305	176.3	POS	C27H43NO8				Alkaloids	Pseudoalkaloids	Terpenoid alkaloids	BQMFTYVYHRJVMQ-VEUWJJFUSA-N	0.00325392	0.00290232	0.00309283	0.00308303	0.00823213	0.00773178	0.00702991	0.00766461	1.33118	0.000227296	0.00282661	2.48607	1.31386
1851	6-Geranylnaringenin	2.64	level2			407.191	328	NEG	C25H28O5				Shikimates and Phenylpropanoids	Flavonoids	Flavanones	YKGCBLWILMDSAV-UHFFFAOYSA-N	0.0059482	0.00446354	0.0039701	0.00479395	0.0144482	0.0131428	0.0123944	0.0133285	1.3022	0.00053997	0.00470794	2.78027	1.47522
1852	4-[5-(4-hydroxy-3,5-dimethoxyphenyl)-3,4-dimethyloxolan-2-yl]-2,6-dimethoxyphenol [IIN-based on	2.64	level2			427.17	321.3	POS	C22H28O7	HMDB0038953	112572-55-1		Shikimates and Phenylpropanoids	Lignans	Furanoid lignans	CAUANPLJFMVCHO-UHFFFAOYSA-N	0.00326986	0.00165806	0.00245988	0.0024626	0.00629743	0.00629048	0.00580201	0.00612998	1.23717	0.00174853	0.00993067	2.48923	1.3157
1853	2-O-Acetyl-20-hydroxyecdysone	2.64	level2			545.314	278.8	POS	C29H46O8				Terpenoids	Steroids	Ecdysteroids	TXLUXHSVMYTTCI-FORVDKSSSA-N	0.00245911	0.00237919	0.00255481	0.00246437	0.0175959	0.0164593	0.0170848	0.0170467	1.34087	0.000386146	0.00383258	6.91725	2.7902
1855	schisandrin B	2.64	level2			423.179	242.7	POS	C23H28O6	HMDB0257360			Shikimates and Phenylpropanoids	Lignans	Dibenzocyclooctadienes lignans	RTZKSTLPRTWFEV-UHFFFAOYSA-N	0.0178466	0.0150306	0.0163188	0.0163987	0.0191875	0.020932	0.0185555	0.0195583	1.10437	0.0430577	0.0963657	1.19268	0.254206
1856	6,7-Dihydroxycoumarin	2.64	level2			201.131	240.7	POS	C9H6O4	HMDB0030819	305-01-1	C09263	Shikimates and Phenylpropanoids	Coumarins	Simple coumarins	ILEDWLMCKZNDJK-UHFFFAOYSA-N	0.00126837	0.0011725	0.00119427	0.00121171	0.00467613	0.00411485	0.00477217	0.00452105	1.33717	0.00328508	0.0150393	3.73112	1.89961
1857	3-(3,4-dihydroxyphenyl)-5,7-dihydroxy-6,8-bis(3-methylbut-2-enyl)chromen-4-one	2.64	level2			421.163	136.5	NEG	C25H26O6				Shikimates and Phenylpropanoids	Isoflavonoids	Isoflavones	OAUIRSVJXOFAOO-UHFFFAOYSA-N	0.62098	0.77434	0.72696	0.707426	0.448441	0.439796	0.459195	0.449144	1.28608	0.0279071	0.0693183	0.634898	-0.655402
1858	N-Methylanthranilic Acid	2.64	level2			152.07	100	POS	C8H9NO2	HMDB0032609	119-68-6	C03005	Alkaloids	Anthranilic acid alkaloids	Anthranillic acid derivatives	WVMBPWMAQDVZCM-UHFFFAOYSA-N	0.0207177	0.029141	0.0255331	0.0251306	0.0715345	0.0485222	0.0593453	0.0598007	1.2671	0.00806453	0.0279539	2.37959	1.25072
1860	Xanyhyletin	2.64	level2			211.074	237.4	POS	C14H12O3		553-19-5	C09317	Shikimates and Phenylpropanoids	Coumarins	Simple coumarins	QOTBQNVNUBKJMS-UHFFFAOYSA-N	0.0666075	0.0667426	0.0690162	0.0674554	0.135089	0.127482	0.125303	0.129291	1.33729	3.5744e-05	0.00110142	1.91669	0.938621
1863	(25S)-26-Hydroxy-24-methylenecycloartan-3-one	2.63	level2			455.388	570.4	POS	C31H50O2	HMDB0034555	232266-06-7		Terpenoids	Triterpenoids	Cycloartane triterpenoids	OKILVWSNJYSCMZ-UHFFFAOYSA-N	0.00989317	0.00891159	0.00999007	0.00959828	0.0184603	0.0183976	0.0185855	0.0184811	1.3331	1.41317e-05	0.00073671	1.92546	0.945205
1865	6-Paradol	2.63	level2			261.184	398.4	POS	C17H26O3	HMDB0030801	27113-22-0	C10482	Polyketides	Aromatic polyketides	Catechols with side chains	CZNLTCTYLMYLHL-UHFFFAOYSA-N	0.0846941	0.0883875	0.103284	0.092122	0.0166508	0.0191516	0.0200063	0.0186029	1.33451	0.000218675	0.00278279	0.201938	-2.30802
1866	Furostane base -2H + 1O, O-Hex, O-Hex-dHex	2.63	level2			901.475	357.4	POS	C45H74O19				Terpenoids	Steroids	Furostane steroids	MYVJSVSGFJDUAQ-UHFFFAOYSA-N	0.00538879	0.00780485	0.00791695	0.00703686	0.0124384	0.010149	0.00972898	0.0107721	1.11113	0.0338761	0.0802813	1.53082	0.6143
1867	Dehydropipernonaline	2.63	level2			340.193	305.8	POS	C21H25NO3	HMDB0040811	107584-38-3		Alkaloids	Lysine alkaloids	Piperidine alkaloids	KAYVDASZRFLFRZ-PQECNABGSA-N	0.0208699	0.0188735	0.0152543	0.0183326	0.164242	0.177333	0.159934	0.16717	1.33646	1.09566e-05	0.000662833	9.11872	3.18883
1868	Corydine	2.63	level2			342.173	235.4	POS	C20H23NO4	HMDB0302141			Alkaloids	Tyrosine alkaloids	Aporphine alkaloids	IDQUPXZJURZAGF-ZDUSSCGKSA-N	0.10544	0.101628	0.102515	0.103194	0.584586	0.548728	0.522224	0.551846	1.34034	0.00155862	0.00921991	5.34764	2.4189
1869	Pipercitine	2.63	level2			350.341	563.1	POS	C23H43NO	HMDB0039937			Alkaloids			PPSREOHNKFETQU-LVZFUZTISA-N	0.00148723	0.00104432	0.00144151	0.00132435	0.00383076	0.00362882	0.00346889	0.00364282	1.30778	0.000188965	0.00257453	2.75064	1.45977
1872	1-[2,4,6-trihydroxy-3-[7-hydroxy-2-(4-hydroxyphenyl)-3,4-dihydro-2H-chromen-4-yl]phenyl]dodecan-1-one	2.63	level2			547.266	362.9	NEG	C33H40O7				Shikimates and Phenylpropanoids	Flavonoids	Flavanones	JGXZVDAPLSTBGZ-UHFFFAOYSA-N	1.17468e-05	0.00077263	0.000592366	0.000458914	0.019404	0.0189966	0.0124188	0.0169398	1.15134	0.0175282	0.0489868	36.9127	5.20605
1876	Silibinin	2.63	level2			481.112	258.7	NEG	C25H22O10				Shikimates and Phenylpropanoids	Flavonoids	Flavonolignans	SEBFKMXJBCUCAI-HKTJVKLFSA-N	0.0663514	0.0709094	0.0720956	0.0697855	0.0369092	0.0609741	0.0477304	0.0485379	1.06287	0.041509	0.0936955	0.695531	-0.523814
1877	angolensin (r)	2.63	level2			295.101	250.5	POS	C16H16O4				Shikimates and Phenylpropanoids			CCOJFDRSZSSKOG-SNVBAGLBSA-N	0.0419267	0.0383865	0.0407015	0.0403382	0.0490434	0.0436543	0.0483766	0.0470248	1.15497	0.0282406	0.0699413	1.16576	0.221272
1879	Esculin	2.63	level2			339.072	112.6	NEG	C15H16O9				Shikimates and Phenylpropanoids	Coumarins	Simple coumarins	XHCADAYNFIFUHF-UHFFFAOYSA-N	0.012296	0.0107351	0.0134677	0.0121663	0.0531839	0.0710798	0.0613596	0.0618744	1.33024	0.00938339	0.0311598	5.08573	2.34645
1880	Alternariol monomethylether	2.63	level2			273.081	45	POS	C15H12O5				Shikimates and Phenylpropanoids	Coumarins	Isocoumarins	LCSDQFNUYFTXMT-UHFFFAOYSA-N	0.520853	0.517071	0.543661	0.527195	0.42338	0.424574	0.370286	0.40608	1.26066	0.00357231	0.0159171	0.770265	-0.376573
1883	2'-Deoxyguanosine 5'-diphosphate (dGDP)	2.63	level2			410.024	421.9	POS	C10H15N5O10P2	HMDB0000960		C00361	Carbohydrates	Nucleosides	Purine nucleos(t)ides	CIKGWCTVFSRMJU-KVQBGUIXSA-N	0.0128895	0.0121356	0.0114913	0.0121721	0.00165091	0.00103315	0.00142824	0.00137077	1.33066	1.67226e-05	0.000788951	0.112615	-3.15053
1884	Piperaduncin_A	2.63	level2			491.209	323.7	POS	C29H30O7				Shikimates and Phenylpropanoids	Flavonoids	Chalcones	UWDJCYWVPNETPR-UHFFFAOYSA-N	0.00116363	0.000572253	0.00146513	0.001067	0.0065554	0.00771982	0.00579311	0.00668944	1.2812	0.000812297	0.00605278	6.26937	2.64832
1885	Chelirubine	2.63	level2			362.105	322.3	POS	C21H15NO5							RNSBFHHWMMKJAM-UHFFFAOYSA-N	0.0331318	0.0318415	0.0262931	0.0304221	0.0145493	0.0223804	0.0173065	0.0180787	1.17826	0.0165205	0.046888	0.594263	-0.750827
1886	Daphnetoxin	2.63	level2			483.205	267.9	POS	C27H30O8				Terpenoids	Diterpenoids	Daphnane diterpenoids	LGEROVMQYFTBDI-FFIGBMOQSA-N	0.00132362	0.00129987	0.000753674	0.00112572	0.00191796	0.00241658	0.00170262	0.00201238	1.09862	0.0345977	0.0816128	1.78764	0.838059
1887	Artonol_C	2.63	level2			501.193	242.8	POS	C30H28O7	HMDB0030489	186824-59-9		Shikimates and Phenylpropanoids	Flavonoids	Flavones	JVLAUHJNDLMVDW-UHFFFAOYSA-N	0.000348668	0.000138808	0.000286363	0.000257947	0.00203497	0.00273908	0.00192446	0.00223283	1.29475	0.00167358	0.00964972	8.65619	3.11373
1889	[(2R,3R,4S,5R,6R)-6-[2-(3,4-dihydroxyphenyl)ethoxy]-3,5-dihydroxy-4-[(2S,3R,4R,5R,6S)-3,4,5-trihydroxy-6-methyloxan-2-yl]oxyoxan-2-yl]methyl (E)-3-(4-hydroxy-3-methoxyphenyl)prop-2-enoate	2.63	level2			639.232	176.3	POS	C30H38O15				Shikimates and Phenylpropanoids	Phenylpropanoids (C6-C3)	Cinnamic acids and derivatives	OFNCUIXPAFLTJZ-PYQKQGIYSA-N	0.0135327	0.00908877	0.0102122	0.0109446	0.0547373	0.0489073	0.0489822	0.0508756	1.32457	6.99881e-05	0.00152153	4.64849	2.21676
1891	Flavonol base + 4O, 1MeO	2.63	level2			331.043	419	NEG	C16H12O8	HMDB0126497	53472-37-0	C12633	Shikimates and Phenylpropanoids	Flavonoids	Flavonols	CFYMYCCYMJIYAB-UHFFFAOYSA-N	0.017198	0.0172254	0.0194957	0.017973	0.024951	0.0211327	0.0254038	0.0238291	1.193	0.0196265	0.0532591	1.32583	0.406891
1892	2H-Cyclopropa[f]benzofuran-2-one, octahydro-5a-methyl-3-methylene-5-(3-oxobutyl)-, (3aR,4aS,5S,5aR,6aR)-	2.63	level2			271.128	392.4	POS	C15H20O3				Terpenoids	Sesquiterpenoids	Carabrane sesquiterpenoids	AGIQIKMGJVLKMA-NLRWUALESA-N	0.0306816	0.0262628	0.0302182	0.0290542	0.0818799	0.0733402	0.0678808	0.074367	1.32519	0.000462088	0.00426987	2.55959	1.35591
1893	4-METHYLCATECHOL	2.63	level2			125.059	278.2	POS	C7H8O2	HMDB0000873	452-86-8	C06730				ZBCATMYQYDCTIZ-UHFFFAOYSA-N	0.00603924	0.00645461	0.00610593	0.00619993	0.0159733	0.0147668	0.0144172	0.0150524	1.33677	5.45893e-05	0.00134351	2.42784	1.27967
1894	Isoflavone base + 2O + 1MeO + 1Prenyl	2.63	level2			351.123	272.6	NEG	C21H20O5	HMDB0038481	27762-99-8		Shikimates and Phenylpropanoids	Isoflavonoids	Isoflavones	JQNSUDIGIIGIOL-UHFFFAOYSA-N	0.0300061	0.026554	0.0294457	0.0286686	0.0503589	0.0643576	0.0495299	0.0547488	1.28903	0.00611838	0.023049	1.90971	0.933355
1895	Mundulone	2.63	level2			435.183	269.4	POS	C26H26O6				Shikimates and Phenylpropanoids	Isoflavonoids	Isoflavones	KJTDZAHLWHEULN-UHFFFAOYSA-N	0.00196351	0.00149216	0.0021911	0.00188226	0.0102654	0.0140633	0.00934939	0.011226	1.31838	0.0212467	0.0564639	5.96413	2.57631
1896	Coumaroyl agmatine (isomer of 1296)	2.63	level2			277.165	266.3	POS	C14H20N4O2				Shikimates and Phenylpropanoids	Phenylpropanoids (C6-C3)	Cinnamic acid amides	AKIHYQWCLCDMMI-UHFFFAOYSA-N	0.00539987	0.00562092	0.00475418	0.00525832	0.0684248	0.060153	0.0738463	0.0674747	1.33894	0.00394359	0.0170191	12.832	3.68167
1897	(2-{[3-(hexadecanoyloxy)-2-[octadeca-9.12-dienoyloxy]propyl phosphono]oxy}ethyl)trimethylazanium	2.63	level2			816.574	166.5	NEG	C42H80NO8P	HMDB0007973	17708-90-6					JLPULHDHAOZNQI-ZTIMHPMXSA-N	2.96096	3.37134	3.23482	3.18904	4.94431	4.96227	4.6387	4.84843	1.31297	0.000487292	0.00441425	1.52034	0.604396
1898	quinine	2.63	level2			347.169	103.3	POS	C20H24N2O2				Alkaloids	Tryptophan alkaloids		LOUPRKONTZGTKE-VOMFEXJBSA-N	0.0038349	0.00211186	0.00212663	0.00269113	0.0333224	0.0330076	0.0300497	0.0321266	1.32486	1.58007e-05	0.000775686	11.938	3.57748
1899	Allysine	2.63	level2			144.066	391.1	NEG	C6H11NO3	HMDB0001263	1962-83-0	C04076	Amino acids and Peptides	Small peptides	Aminoacids	GFXYTQPNNXGICT-UHFFFAOYSA-N	0.0489114	0.0505014	0.0526352	0.0506827	0.113811	0.111675	0.0957592	0.107082	1.32521	0.000624593	0.00515046	2.11279	1.07915
1900	2,2-Dimethylsuccinic acid	2.63	level2			145.05	239.5	NEG	C6H10O4	HMDB0002074	597-43-3		Fatty acids	Fatty Acids and Conjugates	Dicarboxylic acids	GOHPTLYPQCTZSE-UHFFFAOYSA-N	0.0228108	0.0248836	0.0251575	0.0242839	0.0224354	0.0212097	0.021193	0.0216127	1.13777	0.0344337	0.0813134	0.889999	-0.168124
1902	Erythrinasinate_A	2.62	level2			587.502	611.7	POS	C38H66O4	HMDB0038713	102607-46-5					XEOWPOLWKNHXGL-NHQGMKOOSA-N	0.0040246	0.00409692	0.00407085	0.00406413	0.00197089	0.00203714	0.00232667	0.00211157	1.32567	6.19176e-05	0.00142456	0.519562	-0.944632
1904	6-Methoxy-alpha-pyrufuran	2.62	level2			305.104	311.1	POS	C16H16O6	HMDB0041294	167278-44-6	C08761	Shikimates and Phenylpropanoids			ZUMWPOBUQWYISM-UHFFFAOYSA-N	0.113217	0.122592	0.120862	0.11889	0.0721706	0.0769271	0.0558911	0.0683296	1.26278	0.00193829	0.0106225	0.574729	-0.799046
1905	Stearic_Acid_ethyl_ester	2.62	level2			311.296	653.6	NEG	C20H40O2	HMDB0034156	111-61-5		Fatty acids	Fatty esters	Wax monoesters	MVLVMROFTAUDAG-UHFFFAOYSA-N	0.0237396	0.0235309	0.0229415	0.023404	0.0266587	0.026699	0.0293879	0.0275819	1.23925	0.0110545	0.0350117	1.17851	0.236966
1910	Retrorsine	2.62	level2			352.173	308.5	POS	C18H25NO6				Alkaloids	Ornithine alkaloids	Pyrrolizidine alkaloids	BCJMNZRQJAVDLD-CQRYIUNCSA-N	0.0518494	0.0595093	0.0506031	0.0539873	0.151486	0.133154	0.135721	0.14012	1.32936	0.000173295	0.00244784	2.59543	1.37597
1911	alpha-Pinene_oxide	2.62	level2			153.127	277.5	POS	C10H16O	HMDB0003667	1686-14-2	C02759	Terpenoids	Monoterpenoids	Pinane monoterpenoids	NQFUSWIGRKFAHK-UHFFFAOYSA-N	0.0159216	0.0147802	0.0147772	0.0151597	0.0241471	0.023434	0.0254868	0.024356	1.32706	0.000207461	0.00270477	1.60663	0.684037
1913	Semilepidinoside_B	2.62	level2			367.149	152.9	POS	C17H22N2O7	HMDB0033108			Alkaloids			ASPNXCICLVYQCJ-UHFFFAOYSA-N	0.0133674	0.0155217	0.016245	0.0150447	0.0274734	0.02464	0.0262784	0.0261306	1.30387	0.000744282	0.00574865	1.73686	0.796482
1915	Cotoin	2.62	level2			267.058	88.5	POS	C14H12O4				Polyketides	Phloroglucinols	Acyl phloroglucinols	HNJZOHHIXSIJFG-UHFFFAOYSA-N	0.00971254	0.00979923	0.00765501	0.00905559	0.0193748	0.0171953	0.016927	0.0178324	1.29579	0.00109936	0.00735517	1.96921	0.977616
1917	Spinochalcone_C	2.62	level2			375.198	460.7	POS	C25H26O3				Shikimates and Phenylpropanoids	Flavonoids	Chalcones	UKLAAWWFUMSUTQ-ACCUITESSA-N	0.00358296	0.00251289	0.00339963	0.00316516	0.00610958	0.00636285	0.0055464	0.00600628	1.26127	0.00225859	0.0117363	1.89762	0.924192
1918	7-Geranylformononetin	2.62	level2			405.209	419.7	POS	C26H28O4				Shikimates and Phenylpropanoids	Isoflavonoids	Isoflavones	NIHAJZITTDENLE-XMHGGMMESA-N	0.000750621	0.000689843	0.00111615	0.000852204	0.00193246	0.00148495	0.00167779	0.0016984	1.21248	0.0103822	0.0334778	1.99295	0.994904
1919	Soyasapogenol B base + O-HexA, Hex, dHex, 1malonyl	2.62	level2			1029.52	354	POS	C51H80O21	HMDB0038316	333334-36-4		Terpenoids	Triterpenoids	Oleanane triterpenoids	UZZVCPOZXWRBFO-UHFFFAOYSA-N	0.000373728	0.00082769	0.000581929	0.000594449	0.000927365	0.00122795	0.00128992	0.00114841	1.08915	0.0325327	0.0778643	1.93189	0.950016
1920	Integerrine	2.62	level2			594.31	307.4	POS	C35H39N5O4				Alkaloids	Peptide alkaloids	Ansa peptide alkaloids	BDHCXPWIDHVEQN-LKTJRWEVSA-N	0.0258992	0.0241352	0.0225112	0.0241819	0.0425827	0.038401	0.0376199	0.0395345	1.30818	0.00109306	0.00732969	1.63488	0.709187
1923	4-Coumaroylcholine	2.62	level2			250.143	196.9	POS	C14H20NO3							WRLCNNSWESNISL-UHFFFAOYSA-O	0.178603	0.137295	0.162622	0.159507	0.391905	0.428208	0.431658	0.417257	1.32217	0.00012371	0.00203738	2.61592	1.38732
1924	Salsoline	2.62	level2			194.117	519.2	POS	C11H15NO2				Alkaloids	Tyrosine alkaloids	Isoquinoline alkaloids	YTPRLBGPGZHUPD-UHFFFAOYSA-N	0.868501	0.897936	0.874754	0.880397	0.968848	0.983209	0.955724	0.96926	1.29527	0.00175451	0.00995519	1.10094	0.13873
1926	(2E)-3-[(1R,4S,7R,7aR)-1-Hydroxy-3,7-dimethyl-2,4,5,6,7,7a-hexahydro-1H-inden-4-yl]-2-methylacrylic acid	2.62	level2			273.144	400.4	POS	C15H22O3				Terpenoids	Sesquiterpenoids	Valerenane sesquiterpenoids	XJNQXTISSHEQKD-UNXUOHHUSA-N	0.0105355	0.00591361	0.00719148	0.00788019	0.0154665	0.014736	0.0150854	0.0150959	1.19922	0.0320867	0.0770438	1.91568	0.937857
1927	Indospicine	2.62	level2			174.123	330.9	POS	C7H15N3O2				Amino acids and Peptides	Small peptides	Aminoacids	SILQDLDAWPQMEL-YFKPBYRVSA-N	0.00801704	0.00972124	0.00799632	0.0085782	0.0253605	0.023714	0.024359	0.0244778	1.33061	2.86157e-05	0.00099773	2.85349	1.51273
1928	9-Methoxycamptothecin	2.62	level2			401.107	314	POS	C21H18N2O5				Alkaloids	Tryptophan alkaloids	Pyrroloquinoline alkaloids	XVMZDZFTCKLZTF-NRFANRHFSA-N	0.00685114	0.00687823	0.00685025	0.00685987	0.00920436	0.00976035	0.00865599	0.0092069	1.30577	0.017888	0.0497237	1.34214	0.424534
1930	salviaflaside	2.62	level2			521.129	181.1	NEG	C24H26O13				Shikimates and Phenylpropanoids	Phenylpropanoids (C6-C3)	Cinnamic acids and derivatives	DSMWJDJWYGMEBO-PRFRQLEPSA-N	0.0251897	0.0303114	0.0264708	0.0273239	0.0422227	0.0472008	0.0475664	0.0456633	1.29816	0.00136408	0.00846802	1.67118	0.740871
1931	Ptaquiloside	2.62	level2			421.183	155.7	POS	C20H30O8				Terpenoids	Sesquiterpenoids	Illudane sesquiterpenoids	GPHSJPVUEZFIDE-YVPLJZHISA-N	0.0199584	0.0201397	0.019482	0.01986	0.0786581	0.0670562	0.0659515	0.0705553	1.33597	0.0062691	0.0234427	3.55262	1.82889
1933	Adonixanthin/_4-Ketozeaxanthin	2.62	level2			583.413	35.2	POS	C40H54O3				Terpenoids	Carotenoids (C40)	Carotenoids (C40, β-β)	YECXHLPYMXGEBI-ZNQVSPAOSA-N	0.0572642	0.0587999	0.0544831	0.0568491	0.039763	0.0427483	0.0445452	0.0423522	1.29436	0.0015277	0.00910302	0.744993	-0.424701
1936	SCLAREOLIDE	2.61	level2			251.2	467.4	POS	C16H26O2	HMDB0035293	564-20-5		Terpenoids	Diterpenoids	Norlabdane diterpenoids	IMKJGXCIJJXALX-UHFFFAOYSA-N	0.00769028	0.00766697	0.00798269	0.00777998	0.0298635	0.0460462	0.0376237	0.0378445	1.32486	0.0232717	0.060381	4.86434	2.28224
1937	5,3',5'-Trihydroxy-3,6,7,4'-tetramethoxyflavone	2.61	level2			391.106	448.1	POS	C19H18O9				Shikimates and Phenylpropanoids	Flavonoids	Flavonols	NZFZOWRVVVZRJU-UHFFFAOYSA-N	0.00552744	0.0104995	0.00619146	0.00740614	0.0230856	0.0223437	0.0149822	0.0201372	1.21324	0.0135203	0.0405243	2.71898	1.44307
1938	Lycofawcine	2.61	level2			324.216	400.4	POS	C18H29NO4				Alkaloids	Lysine alkaloids	Quinolizidine alkaloids	ZHMNKOPAHVBXQW-HCXPVWKYSA-N	0.0171609	0.0188923	0.0194321	0.0184951	0.129175	0.128433	0.122586	0.126731	1.34028	1.00938e-06	0.000286416	6.85217	2.77656
1941	Betulinic Acid	2.61	level2			457.366	484.2	POS	C30H48O3	HMDB0030094	472-15-1	C08619	Terpenoids	Triterpenoids	Lupane triterpenoids	QGJZLNKBHJESQX-FZFNOLFKSA-N	0.000240548	0.000250408	0.00053271	0.000341222	0.00471053	0.00434924	0.00418502	0.00441493	1.31568	2.37931e-05	0.000919477	12.9386	3.69361
1942	rutamarin	2.61	level2			355.157	434	NEG	C21H24O5	HMDB0030666	14882-94-1	C09308	Shikimates and Phenylpropanoids	Coumarins	Furocoumarins	AWMHMGFGCLBSAY-UHFFFAOYSA-N	0.0279464	0.0350406	0.0332134	0.0320668	0.0175548	0.0087201	0.0118219	0.0126989	1.22688	0.00444392	0.018473	0.396015	-1.33637
1944	Pristimerin	2.61	level2			465.303	376.6	POS	C30H40O4				Terpenoids	Triterpenoids	Friedelane triterpenoids	JFACETXYABVHFD-WXPPGMDDSA-N	0.0621712	0.0696964	0.0659635	0.0659437	0.11479	0.112362	0.100829	0.109327	1.31407	0.000845885	0.006212	1.65788	0.729341
1946	Malonyltryptophan	2.61	level2			289.083	279.1	NEG	C14H14N2O5	HMDB0039500	29399-11-9		Amino acids and Peptides	Small peptides	Dipeptides	OVEAWSPZRGBTSS-UHFFFAOYSA-N	0.979534	1.17814	1.18175	1.11314	0.00738261	0.0488639	0.0464027	0.0342164	1.2729	9.30183e-05	0.00175898	0.0307386	-5.0238
1949	Myricetin, 3-Galactopyranoside	2.61	level2			481.103	51.2	POS	C21H20O13	HMDB0034358	15648-86-9		Shikimates and Phenylpropanoids	Flavonoids	Flavonols	FOHXFLPXBUAOJM-MGMURXEASA-N	0.00942063	0.0118348	0.0106865	0.0106473	0.00480392	0.00522476	0.00523866	0.00508911	1.31638	0.00145016	0.00880698	0.477972	-1.065
1950	PC(42:11)	2.61	level2			834.536	608.9	POS	C50H78NO8P							QWSSCOMDYCBTGV-RHWFHEQESA-N	0.00756025	0.00811188	0.0078654	0.00784584	0.0010407	0.000793395	0.00162974	0.00115461	1.31177	2.23579e-05	0.000892888	0.147162	-2.76452
1951	Gamma-Tocotrienol	2.61	level2			393.314	602.9	POS	C28H42O2	HMDB0012958	14101-61-2	C14155	Terpenoids	Meroterpenoids	Prenyl quinone meroterpenoids	OTXNTMVVOOBZCV-WAZJVIJMSA-N	0.371842	0.375701	0.377531	0.375024	0.209024	0.14039	0.180069	0.176494	1.28449	0.00950334	0.0314515	0.470621	-1.08736
1952	Desmosterol	2.61	level2			367.335	547.9	POS	C27H44O	HMDB0002719	313-04-2	C01802	Terpenoids	Steroids	Cholestane steroids	AVSXSVCZWQODGV-DPAQBDIFSA-N	0.00440421	0.00269264	0.00340594	0.00350093	0.00642915	0.00932125	0.00869829	0.00814956	1.23387	0.00998692	0.0325793	2.32783	1.21899
1954	Coumaroyl putrescin	2.61	level2			235.143	280.7	POS	C13H18N2O2				Alkaloids	Ornithine alkaloids	Polyamines	CJHDBEPXEKGBDW-UHFFFAOYSA-N	0.0142921	0.0106944	0.0123761	0.0124542	0.111956	0.0932286	0.121635	0.10894	1.33389	0.00670919	0.0245773	8.74727	3.12883
1956	5-VALEROLACTONE	2.61	level2			101.059	404.9	POS	C5H8O2	HMDB0250981		C02240	Fatty acids	Fatty esters	Lactones	OZJPLYNZGCXSJM-UHFFFAOYSA-N	0.0140694	0.0133881	0.0127956	0.0134177	0.0148081	0.0158647	0.0155501	0.0154077	1.20366	0.0146409	0.042936	1.14831	0.19951
1957	Carpachromene	2.61	level2			359.091	395.1	POS	C20H16O5				Shikimates and Phenylpropanoids	Flavonoids	Flavones	YXOATFKTEDZPFL-UHFFFAOYSA-N	0.0020515	0.00204449	0.00256416	0.00222005	0.005524	0.00763051	0.00551252	0.00622235	1.29968	0.00525245	0.0207433	2.80279	1.48687
1958	4-hydroxycoumarin	2.61	level2			163.053	372.5	POS	C9H6O3				Shikimates and Phenylpropanoids	Coumarins	Simple coumarins	VXIXUWQIVKSKSA-UHFFFAOYSA-N	0.00403132	0.00378766	0.00341581	0.00374493	0.0284008	0.0295902	0.0268604	0.0282838	1.33953	7.07932e-06	0.000564226	7.55255	2.91696
1960	(E)-9-(1,3-benzodioxol-5-yl)-1-piperidin-1-ylnon-8-en-1-one [IIN-based on	2.61	level2			382.181	328.2	POS	C21H29NO3	HMDB0030340	30505-89-6		Alkaloids	Lysine alkaloids	Piperidine alkaloids	FAXXHNWVMKTOFF-UXBLZVDNSA-N	0.128156	0.125153	0.124697	0.126002	0.361846	0.349301	0.327279	0.346142	1.33904	0.00189962	0.0104822	2.74711	1.45792
1965	1-(4-methoxyphenyl)ethanone	2.61	level2			151.075	278.8	POS	C9H10O2		100-06-1		Shikimates and Phenylpropanoids			NTPLXRHDUXRPNE-UHFFFAOYSA-N	0.00512143	0.00778826	0.0100461	0.00765193	0.0253181	0.0237835	0.0240404	0.0243807	1.27371	0.000368179	0.00373097	3.18621	1.67184
1968	Ptelatoside_B	2.6	level2			429.175	365.3	POS	C20H28O10	HMDB0034447	90852-99-6		Shikimates and Phenylpropanoids	Phenylpropanoids (C6-C3)	Cinnamic acids and derivatives	DIBOBJSTTKLQQV-UHFFFAOYSA-N	0.0349796	0.0361513	0.0355512	0.0355607	0.0292658	0.026714	0.0251254	0.0270351	1.27473	0.00243415	0.0123263	0.760252	-0.395451
1969	Lutein	2.6	level2			591.416	557.1	POS	C40H56O2				Terpenoids	Carotenoids (C40)	Carotenoids (C40, β-ε)	KBPHJBAIARWVSC-NSIPBSJQSA-N	0.0122016	0.0124004	0.0152035	0.0132685	0.027383	0.0271182	0.0228026	0.0257679	1.29245	0.00213439	0.0113113	1.94204	0.957574
1970	14-(hydroxymethyl)-5,9-dimethyltetracyclo[11.2.1.01,10.04,9]hexadecan-5-ol	2.6	level2			291.233	545.5	NEG	C19H32O2				Terpenoids	Diterpenoids	Norkaurane diterpenoids	LZAZGDZVFQSCFO-UHFFFAOYSA-N	0.0730247	0.0672018	0.0698134	0.0700133	0.0747069	0.0745357	0.0781425	0.075795	1.09046	0.0480241	0.104609	1.08258	0.114475
1972	Ginsenoside Rk2	2.6	level2			605.439	528	POS	C36H60O7				Terpenoids	Triterpenoids	Dammarane and Protostane triterpenoids	WMGBQZAELMGYNO-YMWSGFAJSA-N	0.0173508	0.0166914	0.0195273	0.0178565	0.0333405	0.0346986	0.0305968	0.0328786	1.31635	0.000530099	0.00465187	1.84127	0.880699
1976	brassinolide	2.6	level2			503.335	406.3	POS	C28H48O6				Terpenoids	Steroids	Ergostane steroids	IXVMHGVQKLDRKH-KNBKMWSGSA-N	0.000666074	0.00053377	0.000493268	0.000564371	0.0267488	0.0278968	0.0281308	0.0275921	1.34006	0.000205787	0.00269204	48.89	5.61147
1978	Madecassoside	2.6	level2			973.5	332.4	NEG	C48H78O20	HMDB0040122	34540-22-2		Terpenoids	Triterpenoids	Ursane and Taraxastane triterpenoids	BNMGUJRJUUDLHW-UHFFFAOYSA-N	1.17468e-05	1.2935e-05	1.24167e-05	1.23661e-05	0.0186609	0.0200135	0.0167678	0.0184807	1.34136	0.00258747	0.0128358	1494.46	10.5454
1979	1,6-ANHYDRO-B-GLUCOSE	2.6	level2			163.059	313.8	POS	C6H10O5	HMDB0000640	498-07-7		Carbohydrates	Saccharides	Monosaccharides	TWNIBLMWSKIRAT-VFUOTHLCSA-N	0.732805	0.792369	0.786021	0.770398	1.35378	1.6101	1.35864	1.44084	1.31581	0.00150769	0.00902528	1.87025	0.903233
1981	hirsutanone	2.6	level2			346.164	303.1	POS	C19H20O5				Shikimates and Phenylpropanoids	Diarylheptanoids	Linear diarylheptanoids	VWHYFMQKJYFLCC-DUXPYHPUSA-N	0.00671627	0.00577869	0.00613419	0.00620971	0.0189313	0.0175066	0.0183772	0.0182717	1.33584	1.70422e-05	0.000793319	2.94244	1.55701
1982	1,4-naphthalene-dione	2.6	level2			158.036	259.1	NEG	C10H6O2	HMDB0244221		C02617	Polyketides	Naphthalenes	Naphthoquinones	FRASJONUBLZVQX-UHFFFAOYSA-N	0.390742	0.461479	0.451491	0.434571	0.00284371	0.00444191	0.00357409	0.0036199	1.33915	0.00261083	0.0129115	0.00832983	-6.9075
1983	RA-Xii	2.6	level2			917.402	248.9	NEG	C46H58N6O14				Amino acids and Peptides	Oligopeptides	Cyclic peptides	UYXWCWJRGWWTGU-UHFFFAOYSA-N	1.17468e-05	1.2935e-05	1.24167e-05	1.23661e-05	0.032324	0.0351849	0.0295037	0.0323376	1.34138	0.00256417	0.0127619	2615.01	11.3526
1985	Physagulin_G	2.6	level2			723.321	224.2	POS	C36H50O15	HMDB0039694	148076-22-6		Terpenoids	Steroids	Ergostane steroids	LBNOIKRBLYMNFW-UHFFFAOYSA-N	0.000985625	0.00032583	0.000800012	0.000703822	0.0318442	0.0281682	0.0293976	0.0298033	1.32069	1.20512e-05	0.000687727	42.345	5.40412
1986	N-ACETYL-SERINE	2.6	level2			146.046	105.8	NEG	C5H9NO4				Amino acids and Peptides	Small peptides	Dipeptides	JJIHLJJYMXLCOY-UHFFFAOYSA-N	0.0824397	0.0909636	0.0909257	0.0881097	0.134635	0.139183	0.132935	0.135584	1.32387	0.000151418	0.00227316	1.53881	0.62182
1987	5-HYDROXYMETHYL-2-FURANCARBOXYLIC ACID	2.6	level2			143.035	36.6	POS	C6H6O4	HMDB0002432	6338-41-6	C20448	Polyketides	Cyclic polyketides	Furans	PCSKKIUURRTAEM-UHFFFAOYSA-N	0.447573	0.483769	0.471017	0.467453	0.432097	0.44293	0.430314	0.435114	1.10433	0.0459498	0.1012	0.930819	-0.103428
1988	Cediranib	2.6	level2			449.203	262.5	NEG	C25H27FN4O3	HMDB0249749	288383-20-0	D08881	Alkaloids	Tryptophan alkaloids	Carboline alkaloids	XXJWYDDUDKYVKI-UHFFFAOYSA-N	0.0737628	0.0349788	0.0333021	0.0473479	0.146272	0.0854633	0.139899	0.123878	1.14139	0.030724	0.0745896	2.61634	1.38755
1989	Pentose-Hexose + C10H17	2.6	level2			447.228	241.2	NEG	C21H36O10				Terpenoids	Monoterpenoids	Acyclic monoterpenoids	IEGFOTASSBZIBZ-UHFFFAOYSA-N	0.00606752	0.0051269	0.00514024	0.00544489	0.0111868	0.0112513	0.00754582	0.00999465	1.20813	0.0227404	0.0593564	1.8356	0.876254
1990	N-[(4-Hydroxy-3-methoxyphenyl)methyl]octanamide	2.6	level2			280.19	46.1	POS	C16H25NO3	HMDB0036326	58493-47-3		Alkaloids	Pseudoalkaloids	Capsaicins and Capsaicinoids	JYZDUDMWJFJCON-UHFFFAOYSA-N	0.0223954	0.0196332	0.019113	0.0203806	0.0512454	0.0526697	0.0540756	0.0526635	1.33379	1.58841e-05	0.000777538	2.58401	1.36961
1991	Bakuchiol	2.6	level2			279.168	508.2	POS	C18H24O				Shikimates and Phenylpropanoids			LFYJSSARVMHQJB-QIXNEVBVSA-N	0.00140504	0.000851296	0.00106593	0.00110742	0.00610543	0.0048762	0.00482426	0.00526863	1.31312	0.000751441	0.00578106	4.75756	2.25022
1992	[IIN-based on	2.6	level2			471.182	458.7	POS	C24H32O7				Shikimates and Phenylpropanoids	Lignans	Dibenzocyclooctadienes lignans	YEFOAORQXAOVJQ-RZFZLAGVSA-N	0.00428973	0.00429403	0.00459142	0.00439173	0.00622132	0.00574416	0.0056996	0.00588836	1.30256	0.00153626	0.0091325	1.34078	0.423078
1993	Maleamic acid	2.6	level2			114.019	406.6	NEG	C4H5NO3				Amino acids and Peptides	Small peptides	Aminoacids	FSQQTNAZHBEJLS-UPHRSURJSA-N	0.117502	0.114223	0.130981	0.120902	0.244911	0.247434	0.232401	0.241582	1.32979	6.3494e-05	0.00144604	1.99816	0.998673
1995	PHENOLPHTHALEIN	2.6	level2			319.099	275.5	POS	C20H14O4	HMDB0256412		C14286	Shikimates and Phenylpropanoids			KJFMBFZCATUALV-UHFFFAOYSA-N	0.0465944	0.041616	0.0473466	0.0451857	0.0353455	0.0365077	0.0328738	0.034909	1.24686	0.00798729	0.027762	0.772568	-0.372266
1996	15-Acetoxyeremantholide B	2.6	level2			443.158	262.2	POS	C22H28O8				Terpenoids			UNFGCPCUYMXWDG-OOQPEQBFSA-N	0.00800976	0.00835804	0.00790253	0.00809011	0.0113308	0.0118721	0.0105178	0.0112402	1.30526	0.00164376	0.00953541	1.38938	0.474442
1998	Confluentic acid	2.6	level2			499.229	170.5	NEG	C28H36O8				Polyketides	Aromatic polyketides	Depsides	UANVCGQMNRTKGM-UHFFFAOYSA-N	0.0233176	0.030956	0.0273812	0.0272183	0.098942	0.109668	0.0977525	0.102121	1.32955	6.88844e-05	0.00150745	3.75192	1.90763
1999	Sterebin_A	2.6	level2			311.221	86.2	POS	C18H30O4	HMDB0035337	107647-14-3		Terpenoids	Diterpenoids	Labdane diterpenoids	GUVJPXABQYFWPD-BQYQJAHWSA-N	0.0230815	0.0273307	0.0227179	0.0243767	0.0159427	0.0181056	0.0170399	0.0170294	1.24889	0.0102445	0.0331724	0.698592	-0.517478
2001	(5E)-6,10-dimethyl-5,9-undecadien-2-one	2.6	level2			217.158	34.5	POS	C13H22O				Fatty acids	Fatty acyls	Apocarotenoids (Ψ-)	HNZUNIKWNYHEJJ-FMIVXFBMSA-N	0.0238876	0.0260309	0.0259025	0.0252737	0.464656	0.366502	0.402128	0.411096	1.3395	0.00546118	0.0213032	16.2658	4.02377
2002	Moxonidine	2.6	level2			242.078	425.1	POS	C9H12ClN5O	HMDB0041938	75438-57-2	C07451	Alkaloids			WPNJAUFVNXKLIM-UHFFFAOYSA-N	0.0196184	0.0192314	0.0197686	0.0195395	0.024138	0.0232288	0.0265799	0.0246489	1.26393	0.0335014	0.0796209	1.26149	0.335133
2003	Lumazine	2.6	level2			163.025	424.4	NEG	C6H4N4O2	HMDB0254198	487-21-8	C03212	Alkaloids	Pseudoalkaloids	pteridine alkaloids	UYEUUXMDVNYCAM-UHFFFAOYSA-N	0.0101899	0.0104384	0.00938995	0.0100061	0.0318183	0.0350095	0.030464	0.0324306	1.33644	8.48988e-05	0.00168023	3.24108	1.69648
2004	Clovamide	2.6	level2			360.105	401.2	POS	C18H17NO7		53755-03-6		Shikimates and Phenylpropanoids	Phenylpropanoids (C6-C3)	Cinnamic acid amides	GPZFXSWMDFBRGS-UXONFWTHSA-N	0.0376352	0.033461	0.0379023	0.0363329	0.0251855	0.0235292	0.0242235	0.0243127	1.30927	0.00136978	0.00849089	0.669166	-0.579564
2008	Santiaguine	2.59	level2			593.386	278.8	POS	C38H48N4O2				Alkaloids	Ornithine alkaloids		OHNNTQXKHRISJP-AAGWKZJCSA-N	0.206893	0.214355	0.216969	0.212739	1.61374	1.79801	1.41561	1.60912	1.33833	0.00616384	0.0231655	7.56382	2.91911
2009	Nigrosporapyrone D	2.59	level2			169.05	223.7	POS	C8H8O4				Polyketides	Cyclic polyketides	2-pyrone derivatives	MELHVRFNTXYFMN-UHFFFAOYSA-N	0.0159477	0.0186885	0.0168194	0.0171519	0.0303065	0.0309317	0.0348978	0.0320453	1.31422	0.000833107	0.00614974	1.86833	0.901748
2011	Diatoxanthin	2.59	level2			567.418	561.1	POS	C40H54O2							HNYJHQMUSVNWPV-DRCJTWAYSA-N	0.140801	0.128701	0.157704	0.142402	0.0459477	0.0701355	0.0377411	0.0512748	1.25971	0.00209161	0.0111702	0.360071	-1.47365
2015	Steviol	2.59	level2			319.226	447.6	POS	C20H30O3				Terpenoids	Diterpenoids	Tetracyclic diterpenoids	QFVOYBUQQBFCRH-VQSWZGCSSA-N	0.0108366	0.0132969	0.011709	0.0119475	0.0262031	0.0236508	0.0291182	0.026324	1.31159	0.00116024	0.00760534	2.20331	1.13967
2017	stepharine	2.59	level2			298.143	368.1	POS	C18H19NO3				Alkaloids	Tyrosine alkaloids	Isoquinoline alkaloids	OGJKMZVUJJYWKO-CYBMUJFWSA-N	0.0434018	0.0387356	0.0378113	0.0399829	0.0176205	0.0205785	0.0300085	0.0227358	1.17217	0.0138091	0.0411363	0.568639	-0.814416
2020	galbulin	2.59	level2			357.212	212.2	POS	C22H28O4				Shikimates and Phenylpropanoids	Lignans	Arylnaphthalene and aryltetralin lignans	WYBOVISLCPAJFV-QLEMLULZSA-N	0.0198372	0.0200364	0.0189171	0.0195969	0.0322183	0.0314327	0.0285764	0.0307425	1.32016	0.000653669	0.00529568	1.56874	0.649607
2021	Camalexin	2.59	level2			201.05	211.4	POS	C11H8N2S	HMDB0038631	135531-86-1		Alkaloids	Tryptophan alkaloids	Simple indole alkaloids	IYODIJVWGPRBGQ-UHFFFAOYSA-N	0.201837	0.198013	0.194169	0.198007	0.205686	0.213317	0.208592	0.209198	1.17113	0.0234373	0.0606856	1.05652	0.0793229
2022	alpha-santonin	2.59	level2			247.128	70.5	POS	C15H18O3				Terpenoids	Sesquiterpenoids	Eudesmane sesquiterpenoids	XJHDMGJURBVLLE-YWGZHDIYSA-N	0.245505	0.251269	0.255959	0.250911	1.35324	1.00017	1.19282	1.18208	1.33251	0.0117467	0.0366208	4.71114	2.23608
2023	beta-D-Glucopyranoside,_4-(hydroxymethyl)-2-methoxyphenyl	2.59	level2			339.102	45.7	POS	C14H20O8	HMDB0032013	74950-96-2		Shikimates and Phenylpropanoids			SIMPNXWTAVEOTO-RKQHYHRCSA-N	0.140785	0.151677	0.154398	0.148953	0.114976	0.131963	0.113585	0.120174	1.19142	0.0163568	0.0465481	0.806794	-0.309727
2024	GSK2636771	2.59	level2			434.164	84.5	POS	C22H22F3N3O3	HMDB0252955	1372540-25-4		Alkaloids	Tryptophan alkaloids	Carboline alkaloids	XTKLTGBKIDQGQL-UHFFFAOYSA-N	0.0112233	0.00948745	0.0103093	0.01034	0.0517942	0.0490713	0.0455566	0.0488074	1.33732	3.3252e-05	0.00106503	4.72023	2.23886
2025	2-Hydroxycyclohexyl 2-O-[(2E)-3-(4-hydroxyphenyl)-2-propenoyl]-beta-D-glucopyranoside	2.59	level2			447.159	362.4	POS	C21H28O9				Shikimates and Phenylpropanoids			ZTMPDTJBTNGZJH-CBUJGKTRSA-N	0.000348316	0.000611106	0.000599087	0.000519503	0.00110861	0.0009958	0.000940506	0.00101497	1.17797	0.00744403	0.0264034	1.95374	0.966238
2026	Methyl [(1S,3S,7R,8R,9R,12S,13S)-13-(3-furyl)-6,6,8,12-tetramethyl-17-methylene-5,15-dioxo-2,14-dioxatetracyclo[7.7.1.0.1,12..0.3,8.]heptadec-7-yl]acetate	2.59	level2			493.225	322.1	POS	C27H34O7				Terpenoids	Triterpenoids	Limonoids	YNMYHRYTRCKSMI-SQHTYAHXSA-N	0.000437609	0.000299964	0.000737067	0.000491547	0.0165999	0.0234199	0.0157343	0.0185847	1.32532	0.017347	0.0486101	37.8086	5.24064
2027	(-)-Hygroline	2.59	level2			144.138	275.5	POS	C8H17NO				Alkaloids	Lysine alkaloids		CWMYODFAUAJKIV-HTQZYQBOSA-N	0.0353652	0.0310493	0.0344	0.0336048	0.143047	0.145207	0.136803	0.141686	1.33906	2.84254e-06	0.000405464	4.21623	2.07595
2028	Myricetin	2.59	level2			317.027	482.1	NEG	C15H10O8	HMDB0002755	529-44-2	C10107	Shikimates and Phenylpropanoids	Flavonoids	Flavonols	IKMDFBPHZNJCSN-UHFFFAOYSA-N	0.00472882	0.00407752	0.00461905	0.00447513	0.00782615	0.00762728	0.00678994	0.00741446	1.301	0.00144436	0.00878168	1.65681	0.728411
2031	gardenoside	2.59	level2			403.124	354.8	NEG	C17H24O11	HMDB0252642			Terpenoids	Monoterpenoids	Iridoids monoterpenoids	XJMPAUZQVRGFRE-UHFFFAOYSA-N	0.0176501	0.0186889	0.0177637	0.0180342	0.0354544	0.0325641	0.0307468	0.0329218	1.32652	0.000454726	0.00422615	1.82551	0.868303
2032	Lindleyin	2.59	level2			479.151	294.4	POS	C23H26O11	HMDB0030470	59282-56-3		Shikimates and Phenylpropanoids	Phenolic acids (C6-C1)		BJYRNIFAMMOVGW-UHFFFAOYSA-N	0.00179985	0.00217592	0.00198515	0.00198697	0.00130718	0.00164924	0.00163337	0.00152993	1.09334	0.0425055	0.0954169	0.769982	-0.377104
2033	Cucurbitacin E	2.59	level2			579.292	263.6	POS	C32H44O8				Terpenoids	Triterpenoids	Cucurbitane triterpenoids	NDYMQXYDSVBNLL-MUYMLXPFSA-N	0.0195862	0.0169919	0.0197821	0.0187867	0.0264287	0.0301592	0.0269449	0.0278443	1.27598	0.00355034	0.0158502	1.48212	0.567665
2035	Tectoridin	2.59	level2			485.105	216.5	POS	C22H22O11				Shikimates and Phenylpropanoids	Isoflavonoids	Isoflavones	CNOURESJATUGPN-UDEBZQQRSA-N	0.00250076	0.00154697	0.00230774	0.00211849	0.00712573	0.00991522	0.00870139	0.00858078	1.30134	0.00166694	0.00962733	4.05042	2.01807
2037	Dichloroacetic acid	2.59	level2			126.936	50	NEG	C2H2Cl2O2				Fatty acids	Fatty Acids and Conjugates	Dicarboxylic acids	JXTHNDFMNIQAHM-UHFFFAOYSA-N	0.597591	0.794959	0.726998	0.706516	0.0257587	0.0315207	0.0447135	0.0339977	1.33206	0.00691227	0.0250797	0.0481202	-4.37721
2038	(3Z)-3-butylidene-4-hydroxy-5-[3,4,5-trihydroxy-6-(hydroxymethyl)oxan-2-yl]oxy-4,5,6,7-tetrahydro-2-benzofuran-1-one	2.59	level2			369.151	102.7	POS	C18H26O9				Polyketides	Cyclic polyketides	Phthalide derivatives	PQDPYECVZYAHMX-WTKPLQERSA-N	0.00534997	0.00275741	0.00278047	0.00362928	0.0754602	0.0698242	0.0659372	0.0704072	1.32705	2.09385e-05	0.000868409	19.3998	4.27797
2041	Spirostane-3,6-dione	2.58	level2			429.299	397.7	POS	C27H40O4	HMDB0036940	3514-59-8		Terpenoids	Steroids	Spirostane steroids	CGXQJOWMWZPOPV-UHFFFAOYSA-N	0.00793502	0.0094043	0.0105131	0.00928413	0.0306438	0.0270124	0.0465494	0.0347352	1.29052	0.0493562	0.106852	3.74135	1.90356
2042	Pseudolaric acid B-O-beta-D-glucopyranoside	2.58	level2			595.242	361.4	POS	C29H38O13				Terpenoids	Diterpenoids		UUDZDKPKXAEKLA-YHLOYHKPSA-N	0.752297	0.578471	0.667874	0.666214	0.449171	0.486072	0.551074	0.495439	1.12153	0.0429757	0.0962194	0.743663	-0.427279
2043	Echinenone	2.58	level2			551.421	628.7	POS	C40H54O				Terpenoids	Carotenoids (C40)	Carotenoids (C40, β-β)	QXNWZXMBUKUYMD-QQGJMDNJSA-N	0.0141472	0.0136427	0.0155871	0.014459	0.0052195	0.00497514	0.00490583	0.00503349	1.33697	8.99203e-05	0.00172971	0.348122	-1.52234
2045	Sinapoylmalate	2.58	level2			207.137	329	POS	C15H16O9				Shikimates and Phenylpropanoids	Phenylpropanoids (C6-C3)	Cinnamic acids and derivatives	DUDGAPSRYCQPBG-UFFNRZRYSA-N	0.0669991	0.0775143	0.078674	0.0743958	0.00504859	0.0059871	0.00947027	0.00683532	1.32449	6.85073e-05	0.00150227	0.0918778	-3.44414
2047	Bornyl_formate	2.58	level2			183.137	294.7	POS	C11H18O2	HMDB0038245	7492-41-3		Terpenoids	Monoterpenoids	Camphane monoterpenoids	RDWUNORUTVEHJF-UHFFFAOYSA-N	0.0687901	0.0767274	0.0757067	0.0737414	0.00501502	0.00496645	0.00321003	0.00439717	1.33392	1.10932e-05	0.000667171	0.0596295	-4.06783
2048	Benzoylmalic_acid	2.58	level2			239.054	242	POS	C11H10O6	HMDB0039494	22138-51-8		Shikimates and Phenylpropanoids	Phenolic acids (C6-C1)	Simple phenolic acids	NVPJTXMOQCANSN-UHFFFAOYSA-N	0.290978	0.309934	0.302512	0.301141	0.430803	0.409881	0.399201	0.413295	1.31954	0.00048481	0.00440232	1.37243	0.456732
2051	Huperzine A	2.58	level2			265.127	135.7	POS	C15H18N2O				Alkaloids	Pseudoalkaloids	Terpenoid alkaloids	ZRJBHWIHUMBLCN-YQEJDHNASA-N	0.00840983	0.00894086	0.00855544	0.00863538	0.0195332	0.0202846	0.0181303	0.019316	1.33578	8.07433e-05	0.00163778	2.23685	1.16147
2052	gamma-Glutamyltyrosine	2.58	level2			309.109	66.7	NEG	C14H18N2O6	HMDB0011741	7432-23-7		Amino acids and Peptides	Small peptides	Dipeptides	VVLXCWVSSLFQDS-QWRGUYRKSA-N	0.070305	0.0751648	0.0817939	0.0757546	0.124205	0.135278	0.108616	0.1227	1.27693	0.00507113	0.0202539	1.6197	0.695726
2057	[(2R,3S,4S,5R,6S)-6-[2,3-dihydroxy-4-[(E)-3-(4-hydroxyphenyl)prop-2-enoyl]phenoxy]-3,4,5-trihydroxyoxan-2-yl]methyl (E)-3-(4-hydroxyphenyl)prop-2-enoate	2.58	level2			603.152	387.1	POS	C30H28O12				Shikimates and Phenylpropanoids	Flavonoids	Chalcones	MXLIDYXKRCYRPL-SVQBVAIGSA-N	0.000389727	0.000451031	0.000513061	0.000451273	0.0020181	0.00194386	0.00204535	0.00200244	1.33365	4.92831e-06	0.000498548	4.4373	2.14968
2058	[4a-hydroxy-7-(hydroxymethyl)-1-[3,4,5-trihydroxy-6-(hydroxymethyl)oxan-2-yl]oxy-5,7a-dihydro-1H-cyclopenta[c]pyran-5-yl] 4-hydroxybenzoate	2.58	level2			481.131	355.6	NEG	C22H26O12				Terpenoids	Monoterpenoids	Iridoids monoterpenoids	RUMMZUFGTMKLMC-UHFFFAOYSA-N	0.00817322	0.00850866	0.00955947	0.00874712	0.0136594	0.0134244	0.0129065	0.0133301	1.30557	0.000635474	0.00520589	1.52394	0.607809
2059	(-)-EGCG-3''-O-Me	2.58	level2			473.105	321.8	POS	C23H20O11	HMDB0038363	83104-87-4		Shikimates and Phenylpropanoids	Flavonoids	Flavan-3-ols	WVRDOLPMKOCJRJ-DENIHFKCSA-N	0.000723194	0.000236828	0.000391484	0.000450502	0.00125255	0.00187749	0.00114504	0.00142503	1.16081	0.0224841	0.0588769	3.1632	1.66138
2061	Timosaponin A1	2.58	level2			579.394	212.6	POS	C33H54O8	HMDB0030046	14835-43-9	C08886	Terpenoids	Steroids	Spirostane steroids	ZNEIIZNXGCIAAL-UHFFFAOYSA-N	0.00246444	0.00277775	0.00259729	0.00261316	0.00973011	0.0131607	0.00850691	0.0104659	1.31712	0.0296041	0.072522	4.00507	2.00183
2065	Prexanthoperol	2.57	level2			315.192	467.6	POS	C20H26O3	HMDB0034712	119817-27-5		Terpenoids	Diterpenoids	Tetracyclic diterpenoids	KVTOPOITUALWOF-UHFFFAOYSA-N	0.0105321	0.0115651	0.0108266	0.0109746	0.00907048	0.00790225	0.00860989	0.00852754	1.25203	0.00591652	0.0225101	0.777024	-0.363969
2067	Prupaside	2.57	level2			553.224	304.6	POS	C27H36O12	HMDB0038951	126882-52-8		Shikimates and Phenylpropanoids	Lignans	Furanoid lignans	GLRJVMYTCIKGGK-UHFFFAOYSA-N	0.0165432	0.00981854	0.0112241	0.0125286	0.0256054	0.0534299	0.0564472	0.0451608	1.21039	0.0312518	0.0755275	3.60462	1.84985
2068	Hydroxyvernolide	2.57	level2			379.138	266.7	POS	C19H22O8				Terpenoids	Sesquiterpenoids	Germacrane sesquiterpenoids	VPZCNCFYAPSUAL-LQLHESBKSA-N	0.0103898	0.00891835	0.00909777	0.00946864	0.0121275	0.0105737	0.0120403	0.0115805	1.12459	0.0367807	0.0854713	1.22304	0.290469
2070	2'-Methoxyformonetin	2.57	level2			297.08	433.3	NEG	C17H14O5				Shikimates and Phenylpropanoids	Isoflavonoids	Isoflavones	SSRCYGATNWFTBJ-UHFFFAOYSA-N	0.00385468	0.0081369	0.00382689	0.00527282	0.394737	0.173312	0.337773	0.301941	1.3212	0.0465384	0.102164	57.2636	5.83955
2071	Cryptotanshinone	2.57	level2			297.151	326.3	POS	C19H20O3				Polyketides	Naphthalenes	Naphthoquinones	GVKKJJOMQCNPGB-JTQLQIEISA-N	0.0624041	0.0443064	0.0452651	0.0506586	0.0179768	0.0123243	0.0137052	0.0146688	1.30037	0.00417992	0.0177183	0.289561	-1.78806
2072	Peucenin	2.57	level2			259.1	311.3	NEG	C15H16O4				Polyketides	Chromanes	Chromones	DTNGBIGBPPPNNB-UHFFFAOYSA-N	0.0617281	0.0691505	0.0609699	0.0639495	0.0505191	0.0541276	0.045621	0.0500893	1.18917	0.0181324	0.0502259	0.783263	-0.352431
2073	5,7-dihydroxy-3-[4-hydroxy-2-methoxy-3-(3-methylbut-2-enyl)phenyl]-6-(3-methylbut-2-enyl)-2,3-dihydrochromen-4-one	2.57	level2			437.195	302.1	NEG	C26H30O6				Shikimates and Phenylpropanoids	Isoflavonoids	Isoflavanones	ARNVYCOTFWJTBS-UHFFFAOYSA-N	0.0893558	0.0929128	0.0883615	0.09021	1.03104	1.0765	0.96746	1.025	1.34101	0.0011208	0.00744539	11.3624	3.50619
2074	Chalcone base + 3O, 1Prenyl	2.57	level2			323.125	260.2	NEG	C20H20O4				Shikimates and Phenylpropanoids	Flavonoids	Chalcones	TVUGLERLRIQATC-UHFFFAOYSA-N	0.0988586	0.116147	0.116122	0.110376	0.0948323	0.0891639	0.0939895	0.0926619	1.1194	0.0423499	0.0951426	0.839513	-0.252375
2078	NERYL_ACETATE	2.57	level2			219.133	50.3	POS	C12H20O2				Terpenoids	Monoterpenoids	Acyclic monoterpenoids	HIGQPQRQIQDZMP-FLIBITNWSA-N	0.164082	0.158259	0.157862	0.160067	0.257471	0.252058	0.241945	0.250491	1.335	5.38501e-05	0.00133722	1.56491	0.646083
2079	Aristolochic acid C	2.57	level2			326.034	264.5	NEG	C16H9NO7		4849-90-5		Alkaloids	Tyrosine alkaloids	Aporphine alkaloids	NBFGYDJKTHENDP-UHFFFAOYSA-N	0.0407288	0.0424768	0.0418209	0.0416755	0.0316673	0.0269247	0.0297237	0.0294386	1.2927	0.00113143	0.00748727	0.706376	-0.501492
2080	Capreomycin sulfate	2.57	level2			845.271	249.7	NEG	C25H48N14O16S2		1405-37-4		Amino acids and Peptides	Oligopeptides	Cyclic peptides	JLRSDHJLZBDMJX-CYYVUYFKSA-N	0.0457738	0.0301688	0.0409989	0.0389805	0.112086	0.102083	0.108711	0.107627	1.30179	0.00023234	0.00284962	2.76104	1.46521
2081	alpha-Viniferin	2.57	level2			679.204	431.1	POS	C42H30O9	HMDB0030603	62218-13-7		Shikimates and Phenylpropanoids	Stilbenoids	Oligomeric stibenes	KUTVNHOAKHJJFL-UHFFFAOYSA-N	0.000587885	0.000491008	0.000621756	0.000566883	0.00141375	0.00162527	0.00150257	0.00151386	1.32342	0.000201201	0.0026604	2.6705	1.41711
2083	Strictosidinic acid	2.57	level2			517.224	281.8	POS	C26H32N2O9				Alkaloids	Tryptophan alkaloids	Carboline alkaloids	CMMIVMFGFIBAGC-UHFFFAOYSA-N	0.00238896	0.00102518	0.00196562	0.00179325	0.0125711	0.0127537	0.0119677	0.0124308	1.29914	2.21515e-05	0.000889054	6.932	2.79327
2085	Uvedalin	2.57	level2			487.12	280.1	POS	C23H28O9				Terpenoids	Sesquiterpenoids	Germacrane sesquiterpenoids	JIEVJXRUYDZFTD-FOVHWDCHSA-N	0.0304276	0.0202086	0.0266874	0.0257745	0.0371048	0.0410136	0.0339817	0.0373667	1.10336	0.0326168	0.0780161	1.44975	0.535807
2086	Physagulin_B	2.57	level2			547.249	114.6	POS	C30H39ClO7	HMDB0041048	146713-97-5		Terpenoids	Steroids	Ergostane steroids	YTYRPIHQJLEEEG-UHFFFAOYSA-N	0.0081198	0.00972013	0.0091151	0.00898501	0.00398046	0.00358943	0.00259681	0.0033889	1.29135	0.000846437	0.00621497	0.377173	-1.4067
2090	lamalbid	2.57	level2			421.134	401.8	NEG	C17H26O12				Terpenoids	Monoterpenoids	Iridoids monoterpenoids	HHDWDLBSGSYIQQ-GNDDPXJISA-N	0.00128335	0.00161192	0.00155751	0.00148426	0.0058056	0.00523836	0.00445244	0.00516547	1.32286	0.000814545	0.00606318	3.48016	1.79915
2096	1-Cinnamoylpyrrolidine	2.57	level2			202.122	253.5	POS	C13H15NO				Alkaloids	Lysine alkaloids	Piperidine alkaloids	JSIGICUAXLIURX-CMDGGOBGSA-N	0.00799507	0.00745012	0.00771419	0.0077198	0.0131819	0.0122947	0.0122181	0.0125649	1.33008	0.000152591	0.00228355	1.62762	0.702768
2097	Flavone base + 3O, 2MeO	2.57	level2			329.064	208.7	NEG	C17H14O7				Shikimates and Phenylpropanoids	Flavonoids	Flavonols	ZSPZNFOLWQEVQJ-UHFFFAOYSA-N	0.0334461	0.0357605	0.0369146	0.0353737	0.0472343	0.0458802	0.0408055	0.04464	1.21836	0.013701	0.0409164	1.26195	0.335658
2099	3-(2,4-dihydroxyphenyl)-7-hydroxy-6,8-bis(3-methylbut-2-enyl)-2,3-dihydrochromen-4-one	2.57	level2			407.192	100.3	NEG	C25H28O5				Shikimates and Phenylpropanoids	Isoflavonoids	Isoflavanones	QUBRRXBPXPHDJO-UHFFFAOYSA-N	0.0213299	0.021296	0.0213865	0.0213375	0.0906772	0.106627	0.081683	0.0929956	1.33424	0.0102001	0.0330719	4.35833	2.12377
2101	vasicinone	2.57	level2			225.07	57.2	POS	C11H10N2O2				Alkaloids	Anthranilic acid alkaloids	Quinazoline alkaloids	SDIVYZXRQHWCKF-VIFPVBQESA-N	0.00581676	0.00866296	0.00667613	0.00705195	0.00315684	0.00223254	0.00191579	0.00243506	1.26578	0.00743393	0.0263822	0.345303	-1.53407
2103	(3beta,24xi)-Cycloartane-3,24,25-triol	2.56	level2			461.397	598.9	POS	C30H52O3	HMDB0035998	110044-47-8		Terpenoids	Triterpenoids	Cycloartane triterpenoids	BKRIPHYESIGPJC-UHFFFAOYSA-N	0.151091	0.133842	0.13293	0.139288	0.0226279	0.0214536	0.0223982	0.0221599	1.33996	0.00245696	0.0124087	0.159094	-2.65205
2105	Cytochalasin_H	2.56	level2			494.292	345.4	POS	C30H39NO5				Alkaloids	Pseudoalkaloids	Cytochalasan alkaloids	NAEWXXDGBKTIMN-BBXOWAOSSA-N	0.0249211	0.0136889	0.016515	0.018375	0.0630981	0.0763038	0.0794842	0.072962	1.29479	0.000833238	0.0061503	3.97072	1.9894
2106	Luteolin_3'-(3''-acetylglucuronide)	2.56	level2			505.099	297.3	POS	C23H20O13	HMDB0038808			Shikimates and Phenylpropanoids	Flavonoids	Flavones	ODVPGHBKUZXZJN-DXGJXXFVSA-N	0.00497936	0.00596075	0.00496481	0.00530164	0.00243383	0.00364336	0.00292892	0.00300204	1.2206	0.00880401	0.0297614	0.566247	-0.820497
2107	Corynoline	2.56	level2			368.154	278.9	POS	C21H21NO5				Alkaloids	Tyrosine alkaloids	Isoquinoline alkaloids	IQUGPRHKZNCHGC-TYPHKJRUSA-N	0.0136248	0.0189299	0.012518	0.0150243	0.0965471	0.104017	0.0953111	0.0986249	1.32944	1.55452e-05	0.000768647	6.56438	2.71466
2108	Hexose + C13H17O3	2.56	level2			399.166	257.3	NEG	C19H28O9				Terpenoids	Apocarotenoids	Megastigmanes	FUXBESIRIBMOMU-UHFFFAOYSA-N	0.331401	0.398306	0.383026	0.370911	0.0221468	0.0229659	0.0214813	0.022198	1.34029	0.0033407	0.0152116	0.0598473	-4.06257
2109	(-)-Tylocrebrine	2.56	level2			394.197	223.6	POS	C24H27NO4				Alkaloids	Lysine alkaloids	Indolizidine alkaloids	YFEPHJVWLFGWKH-AWEZNQCLSA-N	0.00872235	0.00879031	0.00933847	0.00895038	0.011742	0.0120922	0.0121769	0.0120037	1.32353	0.000206338	0.00269602	1.34114	0.423459
2111	Heneicosanoic acid	2.56	level2			325.311	621.6	NEG	C21H42O2	HMDB0002345	2363-71-5		Fatty acids	Fatty Acids and Conjugates	Unsaturated fatty acids	CKDDRHZIAZRDBW-UHFFFAOYSA-N	0.0278992	0.0289394	0.0321522	0.0296636	0.0416239	0.033831	0.044097	0.0398506	1.13596	0.0382902	0.0881026	1.34342	0.425909
2112	Antheraxanthin	2.56	level2			585.426	545.2	POS	C40H56O3				Terpenoids	Carotenoids (C40)	Carotenoids (C40, β-β)	OFNSUWBAQRCHAV-OYQUVCAXSA-N	0.124467	0.103435	0.152887	0.12693	0.0474915	0.0473821	0.0376867	0.0441868	1.29835	0.00489158	0.019745	0.34812	-1.52234
2113	Ophiopogonoside A	2.56	level2			419.255	542.9	POS	C21H38O8				Terpenoids	Sesquiterpenoids	Eudesmane sesquiterpenoids	DQRUOTCFENUXKV-UHFFFAOYSA-N	0.0164403	0.00877375	0.0147278	0.0133139	0.0586854	0.031475	0.0514716	0.0472107	1.23261	0.016065	0.0459449	3.54596	1.82618
2117	Australigenin	2.56	level2			431.314	329.6	POS	C27H42O4	HMDB0030066	90865-22-8		Terpenoids	Steroids	Spirostane steroids	XLHFBXMTUNORSV-UHFFFAOYSA-N	0.0144134	0.0185735	0.016377	0.0164546	0.0492398	0.0479622	0.0437347	0.0469789	1.32577	0.00011895	0.00199369	2.85505	1.51352
2119	APIGENIN DIMETHYL ETHER	2.56	level2			297.075	230.5	NEG	C17H14O5	HMDB0132454	5128-44-9	C10019	Shikimates and Phenylpropanoids	Flavonoids	Flavones	LZERJKGWTQYMBB-UHFFFAOYSA-N	0.023001	0.0475794	0.0440717	0.0382174	0.0999813	0.108771	0.092322	0.100358	1.21646	0.00233408	0.0119962	2.62598	1.39286
2120	3,7,4'-Trihydroxyflavone	2.56	level2			269.041	225.5	NEG	C15H10O5	HMDB0034004	2034-65-3	C10037	Shikimates and Phenylpropanoids	Flavonoids	Flavonols	OBWHQJYOOCRPST-UHFFFAOYSA-N	0.00120988	0.00057735	0.000192311	0.000659848	0.00446729	0.00268238	0.00338934	0.003513	1.15933	0.00881951	0.0298051	5.32396	2.4125
2122	Garcimangosone_A	2.56	level2			461.2	437.8	POS	C28H28O6	HMDB0036983			Shikimates and Phenylpropanoids	Xanthones	Plant xanthones	SSITWAPGVBPANU-UHFFFAOYSA-N	0.000380849	0.00026541	0.000282112	0.000309457	0.00108782	0.000955154	0.00111081	0.00105126	1.31617	0.000252804	0.00299951	3.39712	1.76431
2123	tabersonine	2.56	level2			337.186	270.2	POS	C21H24N2O2				Alkaloids	Tryptophan alkaloids	Aspidosperma type	FNGGIPWAZSFKCN-HBMCJLEFSA-N	0.0228156	0.0174844	0.0197008	0.0200003	0.168645	0.133467	0.13089	0.144334	1.33281	0.0086288	0.0293415	7.2166	2.85132
2125	Licoricidin	2.56	level2			447.215	421.8	POS	C26H32O5				Shikimates and Phenylpropanoids	Isoflavonoids	Isoflavanones	GBRZTUJCDFSIHM-KRWDZBQOSA-N	0.00319478	0.00313556	0.00315884	0.00316306	0.0107378	0.0137944	0.0154492	0.0133272	1.32665	0.0179267	0.0497936	4.21338	2.07498
2128	Sternbin	2.56	level2			303.089	327.5	POS	C16H14O6				Shikimates and Phenylpropanoids	Flavonoids	Flavanones	DSAJORLEPQBKDA-UHFFFAOYSA-N	0.0154199	0.0130916	0.013951	0.0141542	0.0212322	0.020507	0.017884	0.0198744	1.2378	0.009474	0.0313852	1.40413	0.489681
2133	afzelechin	2.56	level2			273.074	200.6	NEG	C15H14O5				Shikimates and Phenylpropanoids	Flavonoids	Flavan-3-ols	RSYUFYQTACJFML-DZGCQCFKSA-N	0.664871	1.11401	1.06789	0.948922	0.0102111	0.00989146	0.00642115	0.00884124	1.3354	0.0222527	0.0584311	0.00931714	-6.7459
2134	Lusitanicoside	2.56	level2			441.176	102.3	NEG	C21H30O10				Shikimates and Phenylpropanoids	Phenylpropanoids (C6-C3)	Cinnamic acids and derivatives	DAELTTGCCPRYTP-ZLQZEYEISA-N	0.136623	0.162414	0.151199	0.150079	0.130756	0.127252	0.120747	0.126252	1.12589	0.0411297	0.093032	0.841239	-0.249413
2135	Amoxicillin	2.56	level2			364.095	54.3	NEG	C16H19N3O5S	HMDB0015193	26787-78-0	C06827	Amino acids and Peptides	β-lactams	Penicillins	LSQZJLSUYDQPKJ-NJBDSQKTSA-N	0.152588	0.135987	0.146682	0.145085	0.38496	0.377319	0.443875	0.402051	1.33177	0.000285002	0.00320927	2.77113	1.47048
2138	Physovenine	2.55	level2			263.138	245.9	POS	C14H18N2O3				Alkaloids	Tryptophan alkaloids	Pyrroloindole alkaloids	LXTKNVLLWOLCOV-JSGCOSHPSA-N	0.103913	0.107428	0.104306	0.105216	0.216446	0.221763	0.202216	0.213475	1.33695	5.33061e-05	0.001332	2.02893	1.02072
2140	Alpha-Ergocryptine	2.55	level2			518.32	512.3	POS	C32H41N5O5				Alkaloids	Tryptophan alkaloids	Ergot alkaloids	YDOTUXAWKBPQJW-NSLWYYNWSA-N	0.00447193	0.00592572	0.00717697	0.0058582	0.010278	0.0136819	0.0105423	0.0115007	1.20874	0.0137109	0.0409355	1.96318	0.973195
2145	angoletin	2.55	level2			299.132	451.2	NEG	C18H20O4				Shikimates and Phenylpropanoids	Flavonoids	Chalcones	HBRYKWADRULLHU-UHFFFAOYSA-N	0.00208585	0.00210994	0.0013798	0.00185853	0.0413346	0.0385683	0.0451661	0.0416897	1.33565	0.0020123	0.0108793	22.4315	4.48746
2146	Gymnemagenin	2.55	level2			507.366	436.7	POS	C30H50O6				Terpenoids	Triterpenoids	Oleanane triterpenoids	VKJLHZZPVLQJKG-ABHKXHSUSA-N	0.0016453	0.00217162	0.0016902	0.00183571	0.00455142	0.00380075	0.00495971	0.00443729	1.2959	0.00235644	0.0120682	2.41721	1.27334
2147	aschantin	2.55	level2			401.159	308.5	POS	C22H24O7	HMDB0341133		C17845	Shikimates and Phenylpropanoids	Lignans	Furofuranoid lignans	ONDWGDNAFRAXCN-VUEDXXQZSA-N	0.121996	0.141343	0.142876	0.135405	0.0298013	0.0389995	0.0482116	0.0390041	1.30577	0.000355287	0.00365253	0.288055	-1.79558
2148	decyl acetate	2.55	level2			223.169	302	POS	C12H24O2	HMDB0040166	112-17-4		Fatty acids	Fatty esters	Wax monoesters	NUPSHWCALHZGOV-UHFFFAOYSA-N	0.00958957	0.0107958	0.0102535	0.010213	0.101645	0.0952468	0.0826472	0.0931797	1.33882	0.0043694	0.0182583	9.12366	3.18961
2151	Senecionine	2.55	level2			358.167	264.4	POS	C18H25NO5				Alkaloids	Ornithine alkaloids	Pyrrolizidine alkaloids	HKODIGSRFALUTA-JTLQZVBZSA-N	0.250937	0.461671	0.222677	0.311762	0.591543	1.26621	1.15939	1.00572	1.17003	0.0355799	0.0833702	3.22591	1.68971
2155	Typhaneoside	2.55	level2			793.2	71.3	POS	C34H42O20				Shikimates and Phenylpropanoids	Flavonoids	Flavonols	POMAQDQEVHXLGT-QDYYQVSOSA-N	0.00216703	0.000939513	0.00123404	0.00144686	0.0226151	0.0194581	0.0124092	0.0181608	1.30495	0.029506	0.0723373	12.5519	3.64983
2159	1-isothiocyanato-8-methanesulfinyloctane	2.55	level2			234.097	322.2	POS	C10H19NOS2	HMDB0035923	31456-68-5		Fatty acids	Fatty acyls		BCRXKWOQVFKZAG-UHFFFAOYSA-N	0.00602699	0.00552423	0.00575183	0.00576768	0.00871977	0.00854246	0.00730488	0.00818904	1.26534	0.00664288	0.0244141	1.41981	0.505702
2160	Gigantol	2.55	level2			275.123	307.5	POS	C16H18O4				Shikimates and Phenylpropanoids	Stilbenoids	Monomeric stilbenes	SDXKZPQOVUDXIY-UHFFFAOYSA-N	0.0656657	0.0555929	0.0587602	0.0600063	0.0904665	0.0925814	0.0826792	0.0885757	1.28265	0.0025099	0.0125865	1.47611	0.561798
2162	2-(7-methoxy-2-oxochromen-8-yl)-3-methylbut-2-enal	2.55	level2			276.126	220.7	POS	C15H14O4				Shikimates and Phenylpropanoids	Coumarins	Simple coumarins	PBAZKMWQUBDDLZ-UHFFFAOYSA-N	0.00595356	0.00489968	0.0050909	0.00531471	0.0308203	0.0283755	0.0276845	0.0289601	1.33719	1.93439e-05	0.000841663	5.44904	2.446
2163	N-Methylpelletierine	2.55	level2			156.138	216.3	POS	C9H17NO				Alkaloids	Lysine alkaloids	Piperidine alkaloids	TYHJMEIBGDDCPA-SECBINFHSA-N	0.0025559	0.00244592	0.00273291	0.00257824	0.0144217	0.0116023	0.0108207	0.0122816	1.33198	0.0120925	0.0374054	4.76355	2.25204
2166	Alrestatin	2.55	level2			254.043	347.2	NEG	C14H9NO4	HMDB0248259	51411-04-2		Alkaloids			GCUCIFQCGJIRNT-UHFFFAOYSA-N	0.0065611	0.00702653	0.00644444	0.00667736	0.0136655	0.0120001	0.0104432	0.0120362	1.29147	0.00481051	0.0195126	1.80254	0.850035
2167	Physapubescin	2.54	level2			531.299	645.3	POS	C30H42O8	HMDB0033796	74747-52-7		Terpenoids	Steroids	Ergostane steroids	QYJHRILRWPBICK-UHFFFAOYSA-N	0.00257454	0.00305296	0.00244965	0.00269238	0.00395587	0.00362677	0.00336377	0.0036488	1.18449	0.0190013	0.0519797	1.35523	0.43854
2170	Sitosteryl_Acetate	2.54	level2			495.366	582.3	POS	C31H52O2				Terpenoids	Steroids	Cholestane steroids	PBWOIPCULUXTNY-LBKBYZTLSA-N	0.0128135	0.0111567	0.0159764	0.0133156	0.00206688	0.00235597	0.00215811	0.00219365	1.33129	0.015507	0.0447478	0.164744	-2.6017
2171	Ginsenoside-Rg1	2.54	level2			845.48	576	NEG	C42H72O14	HMDB0035857	22427-39-0	C08946	Terpenoids	Triterpenoids	Dammarane and Protostane triterpenoids	YURJSTAIMNSZAE-UHFFFAOYSA-N	0.0631854	0.0384734	0.0598019	0.0538202	0.0104384	0.0275214	0.0123714	0.0167771	1.17677	0.0171548	0.0482013	0.311724	-1.68166
2172	monolinolein	2.54	level2			355.283	527.6	POS	C21H38O4	HMDB0242115			Fatty acids	Glycerolipids	Monoacylglycerols	WECGLUPZRHILCT-HZJYTTRNSA-N	0.0162186	0.0171697	0.0169078	0.0167654	0.0238084	0.0230795	0.0235562	0.0234814	1.33269	4.60545e-05	0.00123844	1.40059	0.486031
2173	securinine	2.54	level2			240.097	501.5	POS	C13H15NO2				Alkaloids	Lysine alkaloids	Quinolizidine alkaloids	SWZMSZQQJRKFBP-DMDPSCGWSA-N	0.0405002	0.0386642	0.0438104	0.0409916	0.000576804	0.000240033	0.000491756	0.000436198	1.33251	0.00131769	0.00827993	0.0106411	-6.5542
2174	5,7-dihydroxy-2-(3,4,5-trihydroxyphenyl)-4H-chromen-4-one	2.54	level2			325.026	444.8	POS	C15H10O7	HMDB0029620	520-31-0	C10192	Shikimates and Phenylpropanoids	Flavonoids	Flavones	ARSRJFRKVXALTF-UHFFFAOYSA-N	0.179687	0.224261	0.18291	0.195619	0.0209272	0.0222824	0.021319	0.0215095	1.33845	0.00669162	0.0245328	0.109956	-3.185
2178	Ergocorninine	2.54	level2			584.29	352.4	POS	C31H39N5O5				Alkaloids	Tryptophan alkaloids	Ergot alkaloids	UJYGDMFEEDNVBF-OGGGUQDZSA-N	0.0237989	0.0275463	0.026391	0.0259121	0.0452681	0.0521504	0.0414815	0.0463	1.29377	0.00353958	0.0158186	1.78681	0.837388
2179	Angelol B	2.54	level2			399.145	331.8	POS	C20H24O7				Shikimates and Phenylpropanoids	Coumarins	Simple coumarins	GFMYIOGFYYHKLA-ZRKIHGRPSA-N	0.0102402	0.0135763	0.00891224	0.0109096	0.00754803	0.0016873	0.00355127	0.0042622	1.04081	0.0399871	0.0910681	0.390685	-1.35592
2181	(E)-Avenanthramide_D	2.54	level2			284.094	270.1	POS	C16H13NO4	HMDB0029282	115610-36-1		Alkaloids	Anthranilic acid alkaloids	Anthranillic acid derivatives	INBHLTYBRKASIZ-JXMROGBWSA-N	0.0228968	0.0228291	0.0237185	0.0231481	0.0395229	0.0370454	0.0344691	0.0370125	1.32088	0.000736033	0.00570685	1.59894	0.677116
2185	4-ureidobutanoic acid	2.54	level2			169.058	42.4	POS	C5H10N2O3	HMDB0341274			Amino acids and Peptides	Small peptides	Aminoacids	QYTWIMMLQKHPGL-UHFFFAOYSA-N	0.0525693	0.0494132	0.0521007	0.0513611	0.231233	0.239524	0.221413	0.230723	1.34048	4.63699e-06	0.000492478	4.49218	2.16742
2186	N-(gamma-Glutamyl)ethanolamine	2.54	level2			191.102	421.5	POS	C7H14N2O4	HMDB0039222	2650-74-0		Amino acids and Peptides	Small peptides	Aminoacids	DGBJQQBLTDLFMF-UHFFFAOYSA-N	0.0528542	0.0553556	0.0535667	0.0539255	0.0871404	0.120188	0.109392	0.105574	1.28869	0.033055	0.0788048	1.95777	0.969209
2187	Demissidine	2.54	level2			400.352	383.7	POS	C27H45NO				Alkaloids	Pseudoalkaloids	Steroidal alkaloids	JALVTHFTYRPDMB-HRRTYWNUSA-N	0.00604625	0.00616826	0.00531629	0.0058436	0.0656379	0.0617128	0.0533792	0.0602433	1.33862	0.00421634	0.0178165	10.3093	3.36587
2189	Limonexic_acid	2.54	level2			503.187	254.8	POS	C26H30O10	HMDB0036075	99026-99-0		Terpenoids	Triterpenoids	Limonoids	RTPPVNISJHFPFX-UHFFFAOYSA-N	0.00150848	0.000670001	0.0010995	0.00109266	0.00497193	0.00569547	0.00501558	0.00522766	1.2859	0.000252944	0.00300033	4.78434	2.25832
2191	Benzethonium	2.54	level2			413.324	182.9	POS	C27H42NO2							SIYLLGKDQZGJHK-UHFFFAOYSA-N	0.00415251	0.00463342	0.00432107	0.004369	0.0281425	0.0335431	0.0283679	0.0300178	1.33855	0.00448772	0.0186004	6.87065	2.78045
2192	3-(10-Heptadecenyl)phenol	2.54	level2			331.303	152.4	POS	C23H38O	HMDB0038525	111047-33-7		Polyketides	Aromatic polyketides	Catechols with side chains	BIEZSEGUHJMPKG-FPLPWBNLSA-N	0.0276327	0.0267518	0.0305694	0.028318	0.0426386	0.0415434	0.0388957	0.0410259	1.29766	0.00136708	0.00848029	1.44876	0.534817
2197	Obacunone	2.54	level2			455.213	469.9	POS	C26H30O7				Terpenoids	Triterpenoids	Limonoids	MAYJEFRPIKEYBL-OASIGRBWSA-N	0.00192298	0.00145741	0.00196248	0.00178096	0.00359409	0.00424803	0.00296271	0.00360161	1.24437	0.0108559	0.0345596	2.02229	1.01599
2199	Swainsonine	2.54	level2			174.112	387.1	POS	C8H15NO3				Alkaloids	Lysine alkaloids	Indolizidine alkaloids	FXUAIOOAOAVCGD-WCTZXXKLSA-N	1.28749	1.15799	1.27037	1.23862	1.76666	1.77056	1.72969	1.75564	1.31655	0.000265688	0.00308461	1.41742	0.503266
2201	KHAYASIN	2.54	level2			555.292	272.2	POS	C32H42O8				Terpenoids	Triterpenoids	Limonoids	OVTKCGJIOHGDAN-HMQLAQMASA-N	0.0238591	0.0234399	0.0246095	0.0239695	0.0142423	0.0148014	0.0124062	0.0138166	1.31524	0.000222308	0.00280809	0.576426	-0.794792
2202	((6aR,9R,10aR)-7-methyl-4,6,6a,7,8,9,10,10a-octahydroindolo[4,3-fg]quinolin-9-yl)methanol	2.54	level2			279.148	268.4	POS	C16H20N2O				Alkaloids	Tryptophan alkaloids	Ergot alkaloids	UFKTZIXVYHGAES-WDBKCZKBSA-N	0.0793624	0.0785809	0.0836296	0.0805243	0.268219	0.26762	0.241773	0.259204	1.33848	3.56397e-05	0.00110114	3.21895	1.68659
2205	Phloridzin	2.54	level2			435.124	171.2	NEG	C21H24O10	HMDB0256451			Shikimates and Phenylpropanoids	Flavonoids	Chalcones	IOUVKUPGCMBWBT-UHFFFAOYSA-N	0.0892248	0.0799251	0.0807316	0.0832938	0.11062	0.128186	0.119993	0.1196	1.28331	0.00349919	0.0156922	1.43588	0.521936
2206	3-[5,7-dihydroxy-2-(4-methoxyphenyl)-4-oxo-chroman-3-yl]-5,7-dihydroxy-2-(4-hydroxyphenyl)chroman-4-one	2.54	level2			537.124	205.3	NEG	C31H24O10				Shikimates and Phenylpropanoids	Flavonoids	Flavanones	QOPUSVUZHPIYER-UHFFFAOYSA-N	0.00501404	0.00265365	0.00319837	0.00362202	0.0226757	0.0217173	0.023835	0.0227427	1.31444	3.45206e-05	0.00108671	6.279	2.65054
2209	(3beta,8beta)-3-Hydroxy-7(11)-eremophilen-12,8-olide	2.53	level2			251.163	321.1	POS	C15H22O3	HMDB0040754	158848-23-8		Terpenoids	Sesquiterpenoids	Eremophilane sesquiterpenoids	CIYRSZQQVYGESH-UHFFFAOYSA-N	0.00844837	0.00944448	0.0079857	0.00862618	0.125818	0.120849	0.0974542	0.114707	1.33807	0.00662339	0.0243642	13.2975	3.73309
2211	Celaxanthin	2.53	level2			551.423	577.6	POS	C40H54O				Terpenoids	Carotenoids (C40)	Carotenoids (C40, β-Ψ)	YYAZSYBBIFIQJT-COVUSDHRSA-N	0.272887	0.246574	0.306865	0.275442	0.0410676	0.0417952	0.0352155	0.0393594	1.33662	0.00492024	0.0198252	0.142896	-2.80697
2212	(2E,4E,6E,8E,10E,12E,14E,16E)-2,6,11,15-tetramethyl-17-(2,6,6-trimethyl-1-cyclohexen-1-yl)-2,4,6,8,10,12,14,16-heptadecaoctaenal	2.53	level2			439.301	504.7	POS	C30H40O				Terpenoids	Apocarotenoids	Apocarotenoids (β-)	DFMMVLFMMAQXHZ-DOKBYWHISA-N	0.00471378	0.00515456	0.00577024	0.00521286	0.00218552	0.00191668	0.00319087	0.00243102	1.23832	0.00489932	0.0197676	0.466351	-1.10051
2214	Aspirin	2.53	level2			179.035	281.4	NEG	C9H8O4	HMDB0001879	50-78-2	C01405	Shikimates and Phenylpropanoids	Phenolic acids (C6-C1)	Simple phenolic acids	BSYNRYMUTXBXSQ-UHFFFAOYSA-N	0.0455724	0.0617669	0.0437984	0.0503792	0.0993973	0.100726	0.104781	0.101635	1.2825	0.00099287	0.00689902	2.01739	1.01249
2217	Retrorsine N-oxide	2.53	level2			368.166	328.7	POS	C18H25NO7							IDIMIWQPUHURPV-BJODLBMNSA-N	0.372068	0.418947	0.400957	0.397324	1.1471	1.03712	1.02622	1.07014	1.33476	8.0329e-05	0.00163342	2.69338	1.42942
2219	forsythoside B	2.53	level2			774.276	328.1	POS	C34H44O19				Shikimates and Phenylpropanoids	Phenylpropanoids (C6-C3)	Cinnamic acids and derivatives	JMBINOWGIHWPJI-UNSOMVRXSA-N	0.00216924	0.00281448	0.00225529	0.002413	0.00343277	0.00305071	0.00337907	0.00328752	1.16707	0.02042	0.0548195	1.36242	0.446167
2220	3,4-Dimethoxybenzoic acid	2.53	level2			205.158	240.1	POS	C9H10O4	HMDB0059763			Shikimates and Phenylpropanoids	Phenolic acids (C6-C1)	Cinnamic acids and derivatives	DAUAQNGYDSHRET-UHFFFAOYSA-N	0.000605063	0.000630869	0.000500255	0.000578729	0.0121718	0.0116757	0.0109935	0.0116137	1.33977	0.000831571	0.00614216	20.0676	4.32679
2221	Mexicanolide	2.53	level2			507.183	236.2	POS	C27H32O7				Terpenoids	Triterpenoids	Limonoids	DNFJSIPZGYBGON-JCLAUGGVSA-N	0.0013154	0.000883947	0.00110034	0.00109989	0.0143183	0.0175394	0.0146621	0.0155066	1.33503	0.00449742	0.0186269	14.0983	3.81745
2223	Etrogol	2.53	level2			207.137	136.5	POS	C13H18O2	HMDB0039101	119417-97-9					IBVFUNAQXWFZQB-UHFFFAOYSA-N	0.223524	0.236413	0.240574	0.233504	0.166569	0.177981	0.15902	0.167857	1.30451	0.000953877	0.00672133	0.718862	-0.476214
2225	(1S,4S,5R,9S,10R,13R,14S)-5-(Acetyloxymethyl)-14-hydroxy-14-(hydroxymethyl)-9-methyltetracyclo[11.2.1.01,10.04,9]hexadecane-5-carboxylic acid	2.53	level2			393.226	63.2	NEG	C22H34O6		1201591-01-6		Terpenoids	Diterpenoids	Norkaurane diterpenoids	XAWLPRCYLCCVFP-CVLIFIHMSA-N	0.0855285	0.129251	0.0984877	0.104422	0.071948	0.0643619	0.0641711	0.066827	1.15722	0.0466476	0.102346	0.639969	-0.643926
2227	2,4,5-Trimethoxystyrene	2.52	level2			195.084	654.6	POS	C11H14O3				Shikimates and Phenylpropanoids	Phenylpropanoids (C6-C3)	Cinnamic acids and derivatives	DAINMNHDGRVBQF-UHFFFAOYSA-N	0.0211235	0.0225853	0.0213152	0.0216747	0.023442	0.0237787	0.0244888	0.0239032	1.19962	0.015717	0.0452017	1.10282	0.141192
2228	1-Naphthalenepentanol, decahydro-6-hydroxy-gamma,5,5,8a-tetramethyl-2-methylene-	2.52	level2			309.278	553.3	POS	C20H36O2				Terpenoids	Diterpenoids	Labdane diterpenoids	ZORMCMFEBIUIRM-UHFFFAOYSA-N	0.00187902	0.00188698	0.0027956	0.0021872	0.0146412	0.011152	0.0134375	0.0130769	1.3219	0.0005203	0.00460013	5.97884	2.57987
2231	3a-Hydroxy-3,5a,9-trimethyl-3a,4,5,5a,6,7,8,9b-octahydronaphtho[1,2-b]furan-2(3H)-one	2.52	level2			251.163	348.2	POS	C15H22O3				Terpenoids	Sesquiterpenoids	Eudesmane sesquiterpenoids	JJTIUYSMVWORIT-UHFFFAOYSA-N	0.0120377	0.00987712	0.0112583	0.0110577	0.0536207	0.0523027	0.0457738	0.0505657	1.33482	9.47038e-05	0.00177483	4.57289	2.19311
2236	methyl chlorogenate	2.52	level2			391.094	447.5	POS	C17H20O9				Shikimates and Phenylpropanoids	Phenylpropanoids (C6-C3)	Cinnamic acids and derivatives	MZNIJRAPCCELQX-AWOKGZDASA-N	0.00476134	0.00849143	0.00513193	0.00612823	0.0224724	0.0219808	0.0157085	0.0200539	1.26372	0.00494058	0.0198804	3.27238	1.71034
2237	Isoeugenitol	2.52	level2			205.048	439.3	NEG	C11H10O4	HMDB0029472	479-06-1		Polyketides	Chromanes	Chromones	XSSGQRFNGHRFBC-UHFFFAOYSA-N	0.00255478	0.00538862	0.00190939	0.00328427	0.00893972	0.00822763	0.0115958	0.00958772	1.16985	0.0130809	0.0395736	2.91929	1.54562
2239	(1R,2E,7R,10E,12S,13S,15R)-12,15-dihydroxy-7-methyl-8-oxabicyclo[11.3.0]hexadeca-2,10-dien-9-one	2.52	level2			279.16	416.5	NEG	C16H24O4				Polyketides	Macrolides	Macrolide lactones	KQNZDYYTLMIZCT-SWGFJCPHSA-N	0.936602	0.941767	0.841268	0.906546	1.89341	2.00694	2.07557	1.99197	1.33279	6.39547e-05	0.00145029	2.19732	1.13575
2241	9-hydroxy-hexadecan-1,16-dioic_acid	2.52	level2			303.216	336.2	POS	C16H30O5	HMDB0037831			Fatty acids	Fatty Acids and Conjugates	Dicarboxylic acids	GZQVGXLMHGPBET-UHFFFAOYSA-N	0.00313166	0.00210824	0.00364779	0.00296257	0.0146048	0.0118166	0.0133591	0.0132602	1.30714	0.00036993	0.00374112	4.47591	2.16218
2242	Baccatin III	2.52	level2			609.221	321.1	POS	C31H38O11				Terpenoids	Diterpenoids	Tetracyclic diterpenoids	OVMSOCFBDVBLFW-VHLOTGQHSA-N	0.0426969	0.0322916	0.0377619	0.0375835	0.0761424	0.0722266	0.0808168	0.0763953	1.30312	0.000571591	0.00487442	2.03268	1.02339
2243	3-[3-[(2E)-3,7-dimethylocta-2,6-dienyl]-4-hydroxyphenyl]-7-hydroxychromen-4-one	2.52	level2			389.181	320.5	NEG	C25H26O4				Shikimates and Phenylpropanoids	Isoflavonoids	Isoflavones	ZBHUUXLHDOUMKM-REZTVBANSA-N	0.0715291	0.069617	0.0843828	0.0751763	0.179675	0.172887	0.161894	0.171485	1.32392	0.000157408	0.00232132	2.28111	1.18973
2244	Ginkgolide_J	2.52	level2			423.132	310.6	NEG	C20H24O10	HMDB0029605	107438-79-9	C07604	Terpenoids	Sesquiterpenoids	Picrotoxane sesquiterpenoids	LMEHVEUFNRJAAV-UHFFFAOYSA-N	0.26142	0.271688	0.262342	0.26515	0.00173708	0.00538545	0.00390181	0.00367478	1.32564	1.80962e-07	0.000149728	0.0138592	-6.17301
2246	Citrusinine_I	2.52	level2			302.105	255.8	POS	C16H15NO5	HMDB0030374	86680-32-2		Alkaloids	Anthranilic acid alkaloids	Acridone alkaloids	UTEAJHNFBCLZHN-UHFFFAOYSA-N	0.025328	0.0194924	0.0223611	0.0223938	0.0537991	0.0481848	0.0645555	0.0555131	1.30066	0.00287847	0.0137929	2.47895	1.30973
[truncated: 81,690 more rows]
