# Supplementary material for: Multi-omics analysis reveals the specific role of biocontrol reagents against tomato bacterial wilt
Source: Front Plant Sci. 2025 Jul 14;16:1620460. doi: 10.3389/fpls.2025.1620460 (PMC12301371; doi:10.3389/fpls.2025.1620460)
Supplement: Supplementary file 4 [file Table4.xlsx]

## Sheet: CK vs Treat1
ID	MS2 name	MS2 score	level	MS1 name	MS1 ppm	mz	rt	type	Formula	HMDB	CAS	KEGG COMPOUND ID	Super.Class	Class	Sub.Class	INCHIKEY	CK_1	CK_2	CK_3	MEAN CK	Treat_1	Treat_2	Treat_3	MEAN Treat	VIP	P-Value	Q-Value	Fold_Change	Log_Foldchange
1	Serine	4	level1			104.035	42.4	NEG	C3H7NO3	HMDB0000187	56-45-1	C00065	Amino acids and Peptides	Small peptides	Aminoacids	MTCFGRXMJLQNBG-REOHCLBHSA-N	0.162959	0.163055	0.173902	0.166638	0.153945	0.144149	0.142661	0.146918	1.19578	0.0177121	0.0507	0.881661	-0.181705
2	3-Hydroxybenzoic acid	3.99	level1			137.024	250.8	NEG	C7H6O3	HMDB0002466	99-06-9	C00587	Shikimates and Phenylpropanoids	Phenolic acids (C6-C1)	Simple phenolic acids	IJFXRHURBJZNAO-UHFFFAOYSA-N	0.513951	0.564684	0.535249	0.537961	0.477285	0.469292	0.468489	0.471689	1.23628	0.0114583	0.0370037	0.876808	-0.189667
4	Dihydroxyacetone	3.99	level1			89.0244	50.1	NEG	C3H6O3	HMDB0001882	96-26-4	C00184	Carbohydrates	Saccharides	Monosaccharides	RXKJFZQQPQGTFL-UHFFFAOYSA-N	3.77227	3.72072	3.56494	3.68598	2.40389	3.35876	2.14946	2.63737	1.06676	0.0483787	0.107414	0.715515	-0.482947
5	Valine	3.99	level1			116.072	47	NEG	C5H11NO2	HMDB0000883	72-18-4	C00183	Amino acids and Peptides	Small peptides	Aminoacids	KZSNJWFQEVHDMF-BYPYZUCNSA-N	0.665947	0.70424	0.705484	0.69189	0.453886	0.408584	0.386733	0.416401	1.31666	0.000310618	0.00334367	0.601831	-0.73257
6	Glyceraldehyde	3.98	level1			89.0244	50.1	NEG	C3H6O3	HMDB0001051	56-82-6	C02154	Carbohydrates	Saccharides	Monosaccharides	MNQZXJOMYWMBOU-UHFFFAOYSA-N	3.77227	3.72072	3.56494	3.68598	2.40389	3.35876	2.14946	2.63737	1.06676	0.0483787	0.107414	0.715515	-0.482947
7	Continentalic acid	3.98	level1			301.217	544.8	NEG	C20H30O2		19889-23-7		Terpenoids	Diterpenoids	Pimarane and Isopimarane diterpenoids	MHVJRKBZMUDEEV-UHFFFAOYSA-N	0.0869719	0.103501	0.130908	0.107127	0.0282988	0.0194788	0.0146246	0.0208008	1.29597	0.00300603	0.0144974	0.194169	-2.36461
8	1,4a,7-trimethyl-7-vinyl-3,4,6,8,8a,9,10,10a-octahydro-2H-phenanthrene-1-carboxylic acid	3.98	level1			301.217	544.8	NEG	C20H30O2				Terpenoids	Diterpenoids	Pimarane and Isopimarane diterpenoids	TVHDZSRRHQKNEZ-UHFFFAOYSA-N	0.0869719	0.103501	0.130908	0.107127	0.0282988	0.0194788	0.0146246	0.0208008	1.29597	0.00300603	0.0144974	0.194169	-2.36461
9	Kaurenoic acid	3.98	level1			301.217	544.8	NEG	C20H30O2	HMDB0302664	6730-83-2	C11874	Terpenoids	Diterpenoids	Kaurane and Phyllocladane diterpenoids	NIKHGUQULKYIGE-OTCXFQBHSA-N	0.0869719	0.103501	0.130908	0.107127	0.0282988	0.0194788	0.0146246	0.0208008	1.29597	0.00300603	0.0144974	0.194169	-2.36461
10	Phenol	3.98	level1			93.0345	282.6	NEG	C6H6O	HMDB0000228	108-95-2	C00146	Shikimates and Phenylpropanoids			ISWSIDIOOBJBQZ-UHFFFAOYSA-N	0.104149	0.109569	0.101198	0.104972	0.0865117	0.0877223	0.0861206	0.0867849	1.30217	0.00189202	0.0106636	0.826746	-0.274483
11	Eleutheroside E	3.98	level1			741.261	252.4	NEG	C34H46O18	HMDB0036410	573-44-4		Shikimates and Phenylpropanoids	Lignans	Furofuranoid lignans	FFDULTAFAQRACT-UHFFFAOYSA-N	0.304088	0.33953	0.315982	0.319867	0.785472	0.676696	0.753171	0.738446	1.33097	0.00024699	0.0029154	2.30861	1.20702
12	Chlorogenic acid	3.98	level1			353.088	235.2	NEG	C16H18O9	HMDB0003164	327-97-9	C00852	Shikimates and Phenylpropanoids	Phenylpropanoids (C6-C3)	Cinnamic acids and derivatives	CWVRJTMFETXNAD-JUHZACGLSA-N	0.13038	0.132845	0.111517	0.124914	0.0491132	0.0578628	0.0590706	0.0553489	1.317	0.000725096	0.0056832	0.443095	-1.17431
13	(3R,5R,8S)-2-(benzoyloxymethyl)-8-methyl-3-[(2S,3R,4S,5S,6R)-3,4,5-trihydroxy-6-(hydroxymethyl)tetrahydropyran-2-yl]oxy-9,10-dioxatetracyclo[4.3.1.02,5.03,8]decane-6-sulfonic acid	3.98	level1			543.117	230.5	NEG	C23H28O13S				Terpenoids	Monoterpenoids	Pinane monoterpenoids	IRBLIRNSGBXQFB-LEMRKIHASA-N	0.0012762	0.00177999	0.00148827	0.00151482	0.00633969	0.00507706	0.00727191	0.00622955	1.31565	0.00194636	0.0108599	4.11241	2.03998
15	Leu-Val	3.98	level1			229.155	107.2	NEG	C11H22N2O3	HMDB0028942	13588-95-9		Amino acids and Peptides	Small peptides	Dipeptides	MDSUKZSLOATHMH-IUCAKERBSA-N	0.0748571	0.0706402	0.077705	0.0744008	0.0993339	0.106402	0.0974754	0.10107	1.30183	0.0014375	0.00889401	1.35846	0.441972
20	Glycerophosphoethanolamine	3.98	level1			214.049	42.6	NEG	C5H14NO6P	HMDB0059660	1190-00-7	C01233				JZNWSCPGTDBMEW-YFKPBYRVSA-N	0.161932	0.163626	0.161836	0.162465	0.0870341	0.0843886	0.0797517	0.0837248	1.33829	3.67915e-06	0.000355857	0.515342	-0.956399
21	Asparagine	3.98	level1			131.046	42	NEG	C4H8N2O3	HMDB0000168	70-47-3	C00152	Amino acids and Peptides	Small peptides	Aminoacids	DCXYFEDJOCDNAF-REOHCLBHSA-N	1.41276	1.45703	1.46724	1.44568	0.42911	0.457048	0.421041	0.435733	1.34122	9.13635e-07	0.000214149	0.301404	-1.73023
22	trans-2-Octenoic acid	3.98	level1			141.092	55.9	NEG	C8H14O2	HMDB0001568	1871-67-6		Fatty acids	Fatty Acids and Conjugates	Unsaturated fatty acids	CWMPPVPFLSZGCY-VOTSOKGWSA-N	0.0554805	0.0749677	0.064366	0.064938	0.115321	0.122797	0.0978629	0.111994	1.24399	0.00715456	0.0264515	1.72462	0.786281
23	Salicylic acid	3.98	level1			137.024	35.7	NEG	C7H6O3	HMDB0001895	69-72-7	C00805	Shikimates and Phenylpropanoids	Phenolic acids (C6-C1)	Simple phenolic acids	YGSDEFSMJLZEOE-UHFFFAOYSA-N	0.549432	0.493628	0.529363	0.524141	0.340009	0.363756	0.344329	0.349365	1.31947	0.000613587	0.00510814	0.666547	-0.585222
24	(5R,9S)-5,9-dimethyl-14-methylene-tetracyclo[11.2.1.01,10.04,9]hexadecane-5-carboxylic acid	3.97	level1			301.217	544.8	NEG	C20H30O2		6730-83-2		Terpenoids	Diterpenoids	Kaurane and Phyllocladane diterpenoids	NIKHGUQULKYIGE-MOWPSDGOSA-N	0.0869719	0.103501	0.130908	0.107127	0.0282988	0.0194788	0.0146246	0.0208008	1.29597	0.00300603	0.0144974	0.194169	-2.36461
25	Syringaresinol diglucoside	3.97	level1			741.261	252.4	NEG	C34H46O18		66791-77-3	C10543	Shikimates and Phenylpropanoids	Lignans	Furofuranoid lignans	FFDULTAFAQRACT-NYYYOYJKSA-N	0.304088	0.33953	0.315982	0.319867	0.785472	0.676696	0.753171	0.738446	1.33097	0.00024699	0.0029154	2.30861	1.20702
26	(1R,2R,4aS,6aS,6bR,10R,11S,12R,12aR)-1,10,11,12-tetrahydroxy-1,2,6a,6b,9,9,12a-heptamethyl-2,3,4,5,6,6a,7,8,8a,10,11,12,13,14b-tetradecahydropicene-4a-carboxylic acid	3.97	level1			503.337	424.1	NEG	C30H48O6		220880-87-5		Terpenoids	Triterpenoids	Ursane and Taraxastane triterpenoids	VULLSLYDWNGNKZ-WSUAMRMCSA-N	0.00274018	0.00401801	0.00514337	0.00396719	0.374651	0.285999	0.364411	0.341687	1.33668	0.00677729	0.0254531	86.1283	6.42842
29	trans-11-Eicosenoic acid	3.97	level1			309.279	589.8	NEG	C20H38O2	HMDB0034296	2462-94-4		Fatty acids	Fatty Acids and Conjugates	Unsaturated fatty acids	BITHHVVYSMSWAG-MDZDMXLPSA-N	0.10517	0.137962	0.12365	0.122261	0.100055	0.0893377	0.0778037	0.0890654	1.11208	0.0442849	0.100497	0.728486	-0.457027
30	trans-Vaccenic acid	3.97	level1			281.248	569.7	NEG	C18H34O2	HMDB0003231	693-72-1	C08367	Fatty acids	Fatty Acids and Conjugates	Unsaturated fatty acids	UWHZIFQPPBDJPM-BQYQJAHWSA-N	4.54912	5.01494	5.29239	4.95215	2.86959	2.63575	2.84474	2.78336	1.32161	0.000695499	0.00553008	0.562051	-0.831228
31	cis-8,11,14-Eicosatrienoic acid	3.97	level1			305.248	557.5	NEG	C20H34O2	HMDB0002925	135625-06-8	C03242	Fatty acids	Fatty Acids and Conjugates	Unsaturated fatty acids	HOBAELRKJCKHQD-QNEBEIHSSA-N	0.344436	0.401847	0.377015	0.374433	0.0978911	0.103583	0.106604	0.102693	1.33866	0.00311786	0.0148565	0.274262	-1.86637
32	Myristic acid	3.97	level1			227.201	543.4	NEG	C14H28O2	HMDB0000806	544-63-8	C06424	Fatty acids	Fatty Acids and Conjugates	Branched fatty acids	TUNFSRHWOTWDNC-UHFFFAOYSA-N	4.13053	4.5269	4.37237	4.34327	2.61358	2.54809	2.32917	2.49695	1.3262	0.000212541	0.00269938	0.5749	-0.798616
33	Undecanoic acid	3.97	level1			185.154	494	NEG	C11H22O2	HMDB0000947	112-37-8	C17715	Fatty acids	Fatty Acids and Conjugates	Branched fatty acids	ZDPHROOEEOARMN-UHFFFAOYSA-N	0.0643738	0.0627343	0.062991	0.0633663	0.0566584	0.0520554	0.0586888	0.0558009	1.16541	0.0202637	0.0559414	0.880607	-0.18343
34	7-Hydroxydihydrobotrydial	3.97	level1			309.17	306.7	NEG	C17H28O6				Terpenoids	Sesquiterpenoids	Botryane sesquiterpenoids	QFIZHIXXEOCVCR-QKWFZOGPSA-N	0.0112652	0.012312	0.013762	0.0124464	0.0207414	0.0199975	0.0190809	0.0199399	1.2968	0.000992998	0.00695429	1.60206	0.679931
35	5-Hydroxyvalproic acid	3.97	level1			159.102	297.6	NEG	C8H16O3	HMDB0013898	53660-23-4	C16650	Fatty acids	Fatty Acids and Conjugates	Hydroxy fatty acids	ZIWBCJXKYKOLJK-UHFFFAOYSA-N	0.120077	0.139068	0.126774	0.12864	0.443088	0.460496	0.423308	0.442297	1.33781	1.3143e-05	0.000636167	3.43827	1.78168
36	3-hydroxybenzaldehyde	3.97	level1			121.029	269.6	NEG	C7H6O2		100-83-4	C03067	Shikimates and Phenylpropanoids	Phenolic acids (C6-C1)	Shikimic acids and derivatives	IAVREABSGIHHMO-UHFFFAOYSA-N	0.542115	0.485584	0.576515	0.534738	0.370318	0.380929	0.445897	0.399048	1.19023	0.0187541	0.0528699	0.746251	-0.422268
38	1-[2,3-dihydroxy-4-[(2S,3R,4S,5S,6R)-3,4,5-trihydroxy-6-(hydroxymethyl)tetrahydropyran-2-yl]oxy-phenyl]ethanone	3.97	level1			329.088	221.3	NEG	C14H18O9		1631711-77-7		Polyketides	Phloroglucinols	Acyl phloroglucinols	IYOWHSWFFIPSDK-LNNRFACYSA-N	0.190937	0.212546	0.196219	0.199901	0.564909	0.568947	0.547169	0.560342	1.3392	2.68106e-06	0.000317148	2.8031	1.48702
40	Succinyladenosine	3.97	level1			382.1	209.3	NEG	C14H17N5O8	HMDB0000912	4542-23-8		Carbohydrates	Nucleosides	Purine nucleos(t)ides	VKGZCEJTCKHMRL-VWJPMABRSA-N	0.211698	0.201872	0.195341	0.202971	0.229715	0.23473	0.220091	0.228179	1.19622	0.0170352	0.0492685	1.1242	0.168893
42	3-Hydroxyisovaleric acid	3.97	level1			117.056	110.7	NEG	C5H10O3	HMDB0000754	625-08-1	C20827	Fatty acids	Fatty Acids and Conjugates	Hydroxy fatty acids	AXFYFNCPONWUHW-UHFFFAOYSA-N	0.103498	0.124267	0.111705	0.113157	0.0768637	0.0619112	0.065539	0.0681046	1.27543	0.00392941	0.0174166	0.601862	-0.732495
43	Glutaric acid	3.97	level1			131.035	105.3	NEG	C5H8O4	HMDB0000661	110-94-1	C00489	Fatty acids	Fatty Acids and Conjugates	Dicarboxylic acids	JFCQEDHGNNZCLN-UHFFFAOYSA-N	0.302081	0.352965	0.317405	0.32415	0.162071	0.176051	0.224883	0.187669	1.25099	0.00492664	0.0203689	0.578955	-0.788476
44	Levulinic acid	3.97	level1			115.04	97	NEG	C5H8O3	HMDB0000720	123-76-2		Fatty acids	Fatty Acids and Conjugates	Oxo fatty acids	JOOXCMJARBKPKM-UHFFFAOYSA-N	0.400591	0.44179	0.450268	0.430883	0.334334	0.343344	0.332281	0.336653	1.28537	0.00389084	0.0172949	0.781309	-0.356034
46	2,2'-Iminodiacetic acid	3.97	level1			132.03	56.9	NEG	C4H7NO4	HMDB0011753	142-73-4	C19911	Amino acids and Peptides	Small peptides	Aminoacids	NBZBKCUXIYYUSX-UHFFFAOYSA-N	0.467661	0.477214	0.496815	0.480563	0.622587	0.659145	0.531646	0.604459	1.1547	0.0332833	0.0808549	1.25781	0.330918
47	2-Aminobutyric acid	3.97	level1			102.056	47.2	NEG	C4H9NO2	HMDB0000452	1492-24-6	C02356	Amino acids and Peptides	Small peptides	Aminoacids	QWCKQJZIFLGMSD-VKHMYHEASA-N	0.611462	0.636334	0.650686	0.632827	0.569433	0.519843	0.493152	0.527476	1.20128	0.0137535	0.0422144	0.833523	-0.262707
48	Homoserine	3.97	level1			118.051	43.4	NEG	C4H9NO3	HMDB0000719	672-15-1	C00263	Amino acids and Peptides	Small peptides	Aminoacids	UKAUYVFTDYCKQA-VKHMYHEASA-N	0.197821	0.196007	0.212708	0.202178	0.118317	0.120579	0.116875	0.118591	1.33564	0.000101605	0.00177626	0.586564	-0.769639
49	Pyroglutamic acid	3.97	level1			128.035	318	NEG	C5H7NO3	HMDB0000267	98-79-3	C01879	Amino acids and Peptides	Small peptides	Aminoacids	ODHCTXKNWHHXJC-VKHMYHEASA-N	2.39913	2.44529	2.55619	2.46687	2.89998	3.02559	2.9015	2.94236	1.2961	0.00160052	0.00955104	1.19275	0.254291
50	(1R,2S,6S,9S,10R,11R,14S,15S,18S,20S,23R,24S)-6,10,23-trimethyl-20-[(2R,3R,4S,5S,6R)-3,4,5-trihydroxy-6-(hydroxymethyl)tetrahydropyran-2-yl]oxy-4-azahexacyclo[12.11.0.02,11.04,9.015,24.018,23]pentacosan-17-one	3.97	level1			576.389	308.9	POS	C33H53NO7		98985-24-1		Alkaloids	Pseudoalkaloids	Steroidal alkaloids	BSSXNTZKMOAXRA-MXXYQIINSA-N	0.00349716	0.00604874	0.00503884	0.00486158	0.0139824	0.012009	0.0119675	0.012653	1.2675	0.00144256	0.00891587	2.60265	1.37998
53	p-Toluquinone	3.97	level1			121.029	123.5	NEG	C7H6O2		553-97-9		Polyketides	Aromatic polyketides	Benzoquinones	VTWDKFNVVLAELH-UHFFFAOYSA-N	1.9503	2.19151	2.00994	2.05058	4.29464	4.5258	4.16221	4.32755	1.33327	5.985e-05	0.00133526	2.1104	1.07752
54	Arjunolic acid	3.97	level1			487.342	76.6	NEG	C30H48O5		465-00-9		Terpenoids	Triterpenoids	Oleanane triterpenoids	RWNHLTKFBKYDOJ-DDHMHSPCSA-N	0.095256	0.126239	0.111251	0.110915	1.70271	1.70036	1.88324	1.7621	1.3394	0.0010911	0.00737715	15.8869	3.98977
55	2-Methylcaproic acid	3.97	level1			129.092	62.7	NEG	C7H14O2				Fatty acids	Fatty Acids and Conjugates	Branched fatty acids	CVKMFSAVYPAZTQ-UHFFFAOYSA-N	0.247852	0.316595	0.280318	0.281588	0.0555636	0.0556191	0.0513813	0.054188	1.33723	0.00730799	0.0268484	0.192437	-2.37754
56	Oleic acid	3.96	level1			281.248	569.7	NEG	C18H34O2	HMDB0000207	112-80-1	C00712	Fatty acids	Fatty Acids and Conjugates	Unsaturated fatty acids	ZQPPMHVWECSIRJ-KTKRTIGZSA-N	4.54912	5.01494	5.29239	4.95215	2.86959	2.63575	2.84474	2.78336	1.32161	0.000695499	0.00553008	0.562051	-0.831228
57	LPA(18:0)	3.96	level1			437.267	648.9	NEG	C21H43O7P	HMDB0007854	325465-92-7		Fatty acids	Glycerophospholipids	Glycerophosphates	LAYXSTYJRSVXIH-HXUWFJFHSA-N	0.0167859	0.0102985	0.0164372	0.0145072	0.0234284	0.0230863	0.0303975	0.0256374	1.13991	0.0248963	0.0652008	1.76722	0.821485
58	cis-11.14-Eicosadienoic acid	3.96	level1			307.264	573.2	NEG	C20H36O2	HMDB0005060	2091-39-6	C16525	Fatty acids	Fatty Acids and Conjugates	Unsaturated fatty acids	XSXIVVZCUAHUJO-HZJYTTRNSA-N	0.376895	0.383208	0.45325	0.404451	0.299863	0.222665	0.235235	0.252588	1.22043	0.0113451	0.0367348	0.624519	-0.679182
59	Linoleic acid	3.96	level1			279.232	551.5	NEG	C18H32O2	HMDB0000673	60-33-3	C01595	Fatty acids	Fatty Acids and Conjugates	Unsaturated fatty acids	OYHQOLUKZRVURQ-HZJYTTRNSA-N	52.9432	55.2147	53.6059	53.9213	47.5393	43.2211	44.9257	45.2287	1.26908	0.00365738	0.0165681	0.838792	-0.253616
61	Docosahexaenoic acid (DHA)	3.96	level1			327.233	539.2	NEG	C22H32O2	HMDB0002183	6217-54-5	C06429	Fatty acids	Fatty Acids and Conjugates	Unsaturated fatty acids	MBMBGCFOFBJSGT-UHFFFAOYSA-N	0.0406027	0.0522475	0.0557043	0.0495181	0.0328708	0.0354514	0.0308325	0.0330516	1.19013	0.025825	0.0669963	0.667464	-0.583238
62	alpha-Linolenic acid	3.96	level1			277.217	534.2	NEG	C18H30O2	HMDB0001388	463-40-1	C06427	Fatty acids	Fatty Acids and Conjugates	Unsaturated fatty acids	DTOSIQBPPRVQHS-PDBXOOCHSA-N	43.3427	42.5914	48.514	44.816	33.1974	26.2017	32.1048	30.5013	1.23047	0.00747491	0.0272814	0.680589	-0.555145
63	Stearidonic acid	3.96	level1			275.201	514.9	NEG	C18H28O2	HMDB0006547	20290-75-9	C16300	Fatty acids	Fatty Acids and Conjugates	Unsaturated fatty acids	JIWBIWFOSCKQMA-LTKCOYKYSA-N	2.35244	2.44887	2.35141	2.38424	1.92028	1.70347	1.94815	1.8573	1.26456	0.00326986	0.0153517	0.778991	-0.360321
67	(4aR,5R,6aR,6aS,6bR,8aR,9R,10S,12aR,14bS)-5,10-dihydroxy-9-(hydroxymethyl)-2,2,6a,6b,9,12a-hexamethyl-1,3,4,5,6,6a,7,8,8a,10,11,12,13,14b-tetradecahydropicene-4a-carboxylic acid	3.96	level1			487.342	448.3	NEG	C30H48O5		52936-64-8		Terpenoids	Triterpenoids	Oleanane triterpenoids	FABOBEOYNMHSHB-UAWZMHPWSA-N	0.0294846	0.0491338	0.0245851	0.0344012	1.37455	2.03067	1.36112	1.58878	1.33132	0.01952	0.0544269	46.1839	5.52932
69	[(2R,3R,4R,8S,10R,11R)-2,3,11-trihydroxy-4,6,6,10-tetramethyl-8-tricyclo[5.3.1.04,11]undecanyl] acetate	3.96	level1			311.186	317.9	NEG	C17H28O5				Terpenoids	Sesquiterpenoids	Presilphiperfolane and Probotryane sesquiterpenoids	XEUSNZUHUUORTO-PEBXEEOJSA-N	0.0131344	0.0189458	0.0128832	0.0149878	0.00405399	0.00461361	0.00608279	0.0049168	1.28249	0.00825751	0.0292849	0.328053	-1.608
71	(3R,4R)-4-[(4-hydroxy-3-methoxy-phenyl)methyl]-3-[[3-methoxy-4-[(2S,3R,4S,5S,6R)-3,4,5-trihydroxy-6-(hydroxymethyl)tetrahydropyran-2-yl]oxy-phenyl]methyl]tetrahydrofuran-2-one	3.96	level1			519.187	282.7	NEG	C26H32O11		23202-85-9		Shikimates and Phenylpropanoids	Lignans	Dibenzylbutyrolactone lignans	AAGCATAPYOEULE-LHHMAMHXSA-N	0.117139	0.13329	0.128268	0.126232	0.448023	0.45613	0.439125	0.447759	1.33943	1.23066e-06	0.000240197	3.54711	1.82664
73	1-[2,4-dihydroxy-6-[(2S,3R,4S,5S,6R)-3,4,5-trihydroxy-6-(hydroxymethyl)tetrahydropyran-2-yl]oxy-phenyl]ethanone	3.96	level1			329.088	233.8	NEG	C14H18O9		26089-54-3		Polyketides	Phloroglucinols	Acyl phloroglucinols	GFKQVLKFPJGJEP-RGCYKPLRSA-N	0.0531495	0.0584432	0.0619579	0.0578502	0.0783276	0.0772354	0.0697183	0.0750938	1.2263	0.00981503	0.033086	1.29807	0.376372
74	L-Valyl-L-phenylalanine	3.96	level1			263.14	225.2	NEG	C14H20N2O3	HMDB0029134	3918-92-1		Amino acids and Peptides	Small peptides	Dipeptides	GJNDXQBALKCYSZ-RYUDHWBXSA-N	0.44703	0.477788	0.435953	0.45359	0.338857	0.348461	0.319167	0.335495	1.3028	0.00147824	0.00905799	0.739643	-0.435099
76	1-[3-hydroxy-4-[(2S,3R,4S,5S,6R)-3,4,5-trihydroxy-6-(hydroxymethyl)tetrahydropyran-2-yl]oxy-phenyl]ethanone	3.96	level1			313.093	209.6	NEG	C14H18O8		17063-43-3					DDMBYMQDYQAZRZ-RKQHYHRCSA-N	0.159306	0.157577	0.162127	0.15967	0.116109	0.111508	0.0974372	0.108351	1.2942	0.000883556	0.00645738	0.678595	-0.559377
77	N-Acetylmethionine	3.96	level1			190.054	205.9	NEG	C7H13NO3S	HMDB0011745	65-82-7	C02712	Amino acids and Peptides	Small peptides	Dipeptides	XUYPXLNMDZIRQH-LURJTMIESA-N	0.0892617	0.0863482	0.0898072	0.0884724	0.0533523	0.0553649	0.0567526	0.0551566	1.33684	2.17575e-05	0.000804814	0.623433	-0.681693
78	Aspartylphenylalanine	3.96	level1			279.099	203.5	NEG	C13H16N2O5	HMDB0000706	13433-09-5		Amino acids and Peptides	Small peptides	Dipeptides	YZQCXOFQZKCETR-UWVGGRQHSA-N	0.101469	0.101343	0.10581	0.102874	0.142266	0.195087	0.192366	0.176573	1.24856	0.0492873	0.108925	1.7164	0.779382
80	gamma-Glutamylvaline	3.96	level1			245.114	97.1	NEG	C10H18N2O5	HMDB0011172			Amino acids and Peptides	Small peptides	Dipeptides	AQAKHZVPOOGUCK-UHFFFAOYSA-N	0.166974	0.185809	0.169922	0.174235	0.12084	0.138305	0.12544	0.128195	1.27284	0.00420798	0.0182611	0.735758	-0.442696
81	Oxypurinol	3.96	level1			151.026	87.9	NEG	C5H4N4O2	HMDB0000786	2465-59-0	C07599	Alkaloids	Pseudoalkaloids	pteridine alkaloids	HXNFUBHNUDHIGC-UHFFFAOYSA-N	0.241015	0.276125	0.243592	0.253578	0.174501	0.194128	0.190852	0.186494	1.26559	0.00638213	0.024424	0.735449	-0.443302
82	3-Hydorxy-3-methylglutaric acid	3.96	level1			161.046	87.9	NEG	C6H10O5	HMDB0000355	503-49-1	C03761	Fatty acids	Fatty Acids and Conjugates	Dicarboxylic acids	NPOAOTPXWNWTSH-UHFFFAOYSA-N	0.425714	0.464345	0.422534	0.437531	0.325284	0.349136	0.322393	0.332271	1.29144	0.00269164	0.0134825	0.759422	-0.397025
85	Allantoin	3.96	level1			157.036	44	NEG	C4H6N4O3	HMDB0000462	97-59-6	C01551	Alkaloids	Pseudoalkaloids	Purine alkaloids	POJWUDADGALRAB-UHFFFAOYSA-N	0.149676	0.170931	0.156382	0.158996	0.0360451	0.0130252	0.0314892	0.0268531	1.26847	0.000150342	0.00221483	0.168892	-2.56583
86	Glutamate	3.96	level1			146.046	415.1	NEG	C5H9NO4	HMDB0000148	56-86-0	C00025	Amino acids and Peptides	Small peptides	Aminoacids	WHUUTDBJXJRKMK-VKHMYHEASA-N	1.07603	1.11043	1.13586	1.10744	1.38551	1.3665	1.37871	1.37691	1.32723	0.000121323	0.00196004	1.24333	0.314207
87	4-Hydroxyisoleucine	3.96	level1			128.071	327.9	NEG	C6H13NO3	HMDB0029449	781658-23-9	C20802	Amino acids and Peptides	Small peptides	Aminoacids	OSCCDBFHNMXNME-DSDZBIDZSA-N	0.243247	0.241375	0.244765	0.243129	0.0564915	0.0558796	0.0563179	0.0562296	1.34237	4.86156e-09	4.55094e-05	0.231275	-2.11232
90	Phe-Val	3.96	level1			265.154	205.3	POS	C14H20N2O3	HMDB0029008	3918-90-9		Amino acids and Peptides	Small peptides	Dipeptides	IEHDJWSAXBGJIP-RYUDHWBXSA-N	0.0788575	0.0718459	0.0754091	0.0753708	0.225764	0.211751	0.317776	0.251763	1.3123	0.0333382	0.080966	3.34033	1.73999
91	Leucylphenylalanine	3.96	level1			277.155	192.5	NEG	C15H22N2O3	HMDB0013243	3063-05-6		Amino acids and Peptides	Small peptides	Dipeptides	KFKWRHQBZQICHA-STQMWFEESA-N	0.383052	0.396645	0.387853	0.389184	0.522593	0.543975	0.514428	0.526999	1.33091	0.000140599	0.00213151	1.35411	0.437348
92	Phe-Leu	3.96	level1			277.155	192.5	NEG	C15H22N2O3	HMDB0253025	3303-55-7		Amino acids and Peptides	Small peptides	Dipeptides	RFCVXVPWSPOMFJ-STQMWFEESA-N	0.383052	0.396645	0.387853	0.389184	0.522593	0.543975	0.514428	0.526999	1.33091	0.000140599	0.00213151	1.35411	0.437348
93	Arbutin	3.96	level1			271.082	166.3	NEG	C12H16O7	HMDB0029943	497-76-7	C06186	Shikimates and Phenylpropanoids			BJRNKVDFDLYUGJ-RMPHRYRLSA-N	0.201174	0.106519	0.197546	0.168413	0.0242405	0.0378645	0.0223969	0.0281673	1.28595	0.0424985	0.0973358	0.167252	-2.57991
95	Isocaproic acid	3.96	level1			115.076	73.3	NEG	C6H12O2	HMDB0000689	646-07-1	C21399	Fatty acids	Fatty Acids and Conjugates	Branched fatty acids	FGKJLKRYENPLQH-UHFFFAOYSA-N	0.893579	1.04674	0.973665	0.971327	0.504173	0.523925	0.474739	0.500946	1.32564	0.000536605	0.004703	0.515733	-0.955303
96	Echinocystic acid	3.96	level1			471.347	51.4	NEG	C30H48O4		510-30-5	C08942	Terpenoids	Triterpenoids	Oleanane triterpenoids	YKOPWPOFWMYZJZ-PRIAQAIDSA-N	0.0166351	0.00779718	0.00808514	0.0108391	0.0272179	0.0432944	0.0358072	0.0354398	1.22257	0.0108792	0.0356443	3.26961	1.70912
97	Corosolic acid	3.96	level1			471.347	51.4	NEG	C30H48O4	HMDB0304746	4547-24-4		Terpenoids	Triterpenoids	Ursane and Taraxastane triterpenoids	HFGSQOYIOKBQOW-ZSDYHTTISA-N	0.0166351	0.00779718	0.00808514	0.0108391	0.0272179	0.0432944	0.0358072	0.0354398	1.22257	0.0108792	0.0356443	3.26961	1.70912
98	Maleic acid	3.96	level1			115.004	50.8	NEG	C4H4O4	HMDB0000176	110-16-7	C01384	Fatty acids	Fatty Acids and Conjugates	Dicarboxylic acids	VZCYOOQTPOCHFL-UPHRSURJSA-N	0.586097	0.718339	0.660149	0.654862	0.194814	0.220722	0.194942	0.203493	1.33298	0.0003256	0.00343635	0.310742	-1.68621
99	Lufenuron	3.96	level1			508.971	32.3	NEG	C17H8Cl2F8N2O3	HMDB0254195	103055-07-8	C18434	Alkaloids			PWPJGUXAGUPAHP-UHFFFAOYSA-N	6.85639	8.8232	7.61245	7.76401	0.440274	0.469436	0.413132	0.440947	1.3405	0.0060304	0.0234639	0.0567938	-4.13812
100	2,6-Dihydroxybenzoic acid	3.96	level1			153.019	25.8	NEG	C7H6O4	HMDB0013676	303-07-1	C21298	Shikimates and Phenylpropanoids	Phenolic acids (C6-C1)	Simple phenolic acids	AKEUNCKRJATALU-UHFFFAOYSA-N	2.19069	1.82199	1.94479	1.98582	0.663172	0.395259	0.644032	0.567488	1.29281	0.000513193	0.00457813	0.285769	-1.80708
101	Cholesteryl sulfate	3.96	level1			465.304	25.2	NEG	C27H46O4S	HMDB0000653	1256-86-6	C18043	Terpenoids	Steroids	Cholestane steroids	BHYOQNUELFTYRT-DPAQBDIFSA-N	1.816	2.00343	1.62223	1.81389	1.07707	1.15168	1.13038	1.11971	1.29696	0.00347571	0.0160058	0.617299	-0.69596
102	4-(Methylamino)butanoic acid	3.95	level1			116.072	47	NEG	C5H11NO2		1119-48-8	C15987	Amino acids and Peptides	Small peptides	Aminoacids	AOKCDAVWJLOAHG-UHFFFAOYSA-N	0.665947	0.70424	0.705484	0.69189	0.453886	0.408584	0.386733	0.416401	1.31666	0.000310618	0.00334367	0.601831	-0.73257
103	Dimethylglycine	3.95	level1			102.056	47.2	NEG	C4H9NO2	HMDB0000092	1118-68-9	C01026	Amino acids and Peptides	Small peptides	Aminoacids	FFDGPVCHZBVARC-UHFFFAOYSA-N	0.611462	0.636334	0.650686	0.632827	0.569433	0.519843	0.493152	0.527476	1.20128	0.0137535	0.0422144	0.833523	-0.262707
104	gamma-Linolenic acid	3.95	level1			277.217	534.2	NEG	C18H30O2	HMDB0003073	506-26-3	C06426	Fatty acids	Fatty Acids and Conjugates	Unsaturated fatty acids	VZCCETWTMQHEPK-QNEBEIHSSA-N	43.3427	42.5914	48.514	44.816	33.1974	26.2017	32.1048	30.5013	1.23047	0.00747491	0.0272814	0.680589	-0.555145
106	(1S,2R,4aS,6aS,6bR,9R,10R,11R,12aR)-10,11-dihydroxy-9-(hydroxymethyl)-1,2,6a,6b,9,12a-hexamethyl-2,3,4,5,6,6a,7,8,8a,10,11,12,13,14b-tetradecahydro-1H-picene-4a-carboxylic acid	3.95	level1			487.342	448.3	NEG	C30H48O5		464-92-6		Terpenoids	Triterpenoids	Ursane and Taraxastane triterpenoids	JXSVIVRDWWRQRT-BEELBYNOSA-N	0.0294846	0.0491338	0.0245851	0.0344012	1.37455	2.03067	1.36112	1.58878	1.33132	0.01952	0.0544269	46.1839	5.52932
107	Euscaphic acid	3.95	level1			487.342	448.3	NEG	C30H48O5	HMDB0036651	53155-25-2	C17890	Terpenoids	Triterpenoids	Ursane and Taraxastane triterpenoids	OXVUXGFZHDKYLS-QUFHAEKXSA-N	0.0294846	0.0491338	0.0245851	0.0344012	1.37455	2.03067	1.36112	1.58878	1.33132	0.01952	0.0544269	46.1839	5.52932
108	(1S,2R,4aS,6aS,6bR,10S,11R,12aR,14bS)-10,11-dihydroxy-1,2,6a,6b,9,9,12a-heptamethyl-2,3,4,5,6,6a,7,8,8a,10,11,12,13,14b-tetradecahydro-1H-picene-4a-carboxylic acid	3.95	level1			471.347	51.4	NEG	C30H48O4				Terpenoids	Triterpenoids	Ursane and Taraxastane triterpenoids	HFGSQOYIOKBQOW-JIOZQPJLSA-N	0.0166351	0.00779718	0.00808514	0.0108391	0.0272179	0.0432944	0.0358072	0.0354398	1.22257	0.0108792	0.0356443	3.26961	1.70912
109	Anemosapogenin	3.95	level1			471.347	51.4	NEG	C30H48O4	HMDB0245637	85999-40-2		Terpenoids	Triterpenoids	Lupane triterpenoids	HXWLKAXCQLXHML-UHFFFAOYSA-N	0.0166351	0.00779718	0.00808514	0.0108391	0.0272179	0.0432944	0.0358072	0.0354398	1.22257	0.0108792	0.0356443	3.26961	1.70912
110	(E)-5-(1,2,4a,5-tetramethyl-2,3,4,7,8,8a-hexahydronaphthalen-1-yl)-3-methyl-pent-2-enoic acid	3.95	level1			303.233	545.9	NEG	C20H32O2				Terpenoids	Diterpenoids	Colensane and Clerodane diterpenoids	NLVMTSRTOGOFQD-BUHFOSPRSA-N	1.69171	2.02185	1.94915	1.88757	0.27921	0.292433	0.289962	0.287201	1.3404	0.00384602	0.0171582	0.152154	-2.71639
111	18α-Glycyrrhetinic acid	3.95	level1			469.332	499.3	NEG	C30H46O4	HMDB0244828	1449-05-4		Terpenoids	Triterpenoids	Oleanane triterpenoids	MPDGHEJMBKOTSU-UHFFFAOYSA-N	1.17468e-05	1.2935e-05	1.24167e-05	1.23661e-05	0.0258393	0.0222737	0.0279165	0.0253431	1.34218	0.0042045	0.0182519	2049.4	11.001
112	9-Oxo-10(E),12(E)-octadecadienoic acid	3.95	level1			293.212	485.5	NEG	C18H30O3	HMDB0004669	54232-58-5	C14766	Fatty acids	Fatty Acids and Conjugates	Unsaturated fatty acids	LUZSWWYKKLTDHU-SIGMCMEVSA-N	4.0446	4.54992	4.22668	4.27373	11.6412	9.42154	11.1156	10.7261	1.32589	0.000711279	0.00561451	2.50977	1.32755
115	3-Hydroxydecanoic acid	3.95	level1			187.134	413.1	NEG	C10H20O3	HMDB0002203	19526-23-9		Fatty acids	Fatty Acids and Conjugates	Hydroxy fatty acids	FYSSBMZUBSBFJL-VIFPVBQESA-N	0.0551883	0.0588545	0.0570573	0.0570334	0.034274	0.0399376	0.0374941	0.0372352	1.31082	0.000531965	0.00467999	0.652867	-0.615139
116	2-Hydroxyoctanoic acid	3.95	level1			159.102	371.5	NEG	C8H16O3	HMDB0000711	617-73-2		Fatty acids	Fatty Acids and Conjugates	Hydroxy fatty acids	JKRDADVRIYVCCY-UHFFFAOYSA-N	0.0238698	0.0234095	0.0243395	0.0238729	0.0214936	0.0217443	0.0209855	0.0214078	1.29219	0.00212261	0.0115012	0.89674	-0.157238
118	Indolelactic acid	3.95	level1			204.066	289.7	NEG	C11H11NO3	HMDB0000671	1821-52-9	C02043	Alkaloids	Tryptophan alkaloids	Simple indole alkaloids	XGILAAMKEQUXLS-UHFFFAOYSA-N	0.145146	0.167819	0.155851	0.156272	0.00642942	0.00328971	0.00430328	0.00467414	1.33379	0.00155831	0.00938257	0.0299103	-5.06322
119	(E)-3-(3,4-dihydroxyphenyl)-N-[2-(4-hydroxyphenyl)ethyl]prop-2-enamide	3.95	level1			298.108	288.8	NEG	C17H17NO4		103188-48-3		Shikimates and Phenylpropanoids	Phenylpropanoids (C6-C3)	Cinnamic acid amides	VSHUQLRHTJOKTA-XBXARRHUSA-N	8.5027	8.26751	7.38511	8.05178	0.761573	0.679667	0.763015	0.734752	1.34066	0.00203562	0.011192	0.0912534	-3.45398
120	5-[6-(hydroxymethyl)-7-oxatricyclo[4.3.0.03,9]nonan-9-yl]-2-methyl-4-oxo-pentanoic acid	3.95	level1			281.139	284.8	NEG	C15H22O5				Terpenoids			DULAWUXQXSFPOC-UHFFFAOYSA-N	0.31116	0.378829	0.348074	0.346021	0.0365447	0.0369425	0.0344731	0.0359868	1.34074	0.0039122	0.0173624	0.104002	-3.26532
121	methyl (E)-3-[4-[(2S,3R,4S,5S,6R)-3,4,5-trihydroxy-6-(hydroxymethyl)tetrahydropyran-2-yl]oxyphenyl]prop-2-enoate	3.95	level1			339.108	268.7	NEG	C16H20O8		554-87-0		Shikimates and Phenylpropanoids	Phenylpropanoids (C6-C3)	Cinnamic acids and derivatives	KPYQJVYNSWDFQU-ORXIWHNOSA-N	0.0800224	0.0846376	0.0796851	0.0814484	0.0934189	0.0957078	0.0893904	0.092839	1.23404	0.00955424	0.0324687	1.13985	0.188845
124	Ketoleucine	3.95	level1			129.056	245.9	NEG	C6H10O3	HMDB0000695	816-66-0	C00233	Fatty acids	Fatty Acids and Conjugates	Oxo fatty acids	BKAJNAXTPSGJCU-UHFFFAOYSA-N	0.119533	0.130221	0.122006	0.12392	0.0636505	0.0711253	0.0615504	0.0654421	1.32645	0.000176309	0.0024257	0.528098	-0.921122
126	3-Isopropylmalic acid	3.95	level1			175.061	215.9	NEG	C7H12O5	HMDB0012156	921-28-8	C04411	Fatty acids	Fatty Acids and Conjugates	Dicarboxylic acids	RNQHMTFBUSSBJQ-CRCLSJGQSA-N	3.09275	3.6142	3.28547	3.33081	0.540942	0.546159	0.499371	0.528824	1.34038	0.00272393	0.0135868	0.158767	-2.65501
127	Phenylalanine	3.95	level1			164.072	105.9	NEG	C9H11NO2	HMDB0000159	63-91-2	C00079	Amino acids and Peptides	Small peptides	Aminoacids	COLNVLDHVKWLRT-QMMMGPOBSA-N	8.93512	9.29499	9.02378	9.08463	11.498	11.8611	11.2861	11.5484	1.32574	0.000248285	0.0029245	1.2712	0.34619
129	Mannitol	3.95	level1			181.072	42.1	NEG	C6H14O6	HMDB0000765	69-65-8	C00392	Carbohydrates	Saccharides	Monosaccharides	FBPFZTCFMRRESA-KVTDHHQDSA-N	0.386688	0.451615	0.431475	0.423259	0.0687204	0.0758246	0.0618993	0.0688148	1.33829	5.50261e-05	0.00127891	0.162583	-2.62075
131	2-Aminoadipic acid	3.95	level1			160.061	427	NEG	C6H11NO4	HMDB0000510	542-32-5	C00956	Amino acids and Peptides	Small peptides	Aminoacids	OYIFNHCXNCRBQI-UHFFFAOYSA-N	0.0274267	0.029782	0.0255597	0.0275895	0.0161898	0.0150217	0.0131446	0.0147854	1.30495	0.00105931	0.00723755	0.535906	-0.899948
132	Azelaic acid	3.95	level1			187.097	359.2	NEG	C9H16O4	HMDB0000784	123-99-9	C08261	Fatty acids	Fatty Acids and Conjugates	Dicarboxylic acids	BDJRBEYXGGNYIS-UHFFFAOYSA-N	2.03264	2.26038	2.11036	2.13446	3.55644	3.51284	3.42306	3.49745	1.33008	6.14472e-05	0.00135559	1.63856	0.712431
135	4-Acetamidobutyric acid	3.95	level1			144.066	300.8	NEG	C6H11NO3	HMDB0003681	3025-96-5	C02946	Fatty acids	Fatty Acids and Conjugates	Unsaturated fatty acids	UZTFMUBKZQVKLK-UHFFFAOYSA-N	0.0459989	0.0478008	0.050584	0.0481279	0.0241357	0.0267853	0.0243772	0.0250994	1.33144	0.000128655	0.00202757	0.521515	-0.93922
136	Ribitol	3.95	level1			151.061	252.2	NEG	C5H12O5	HMDB0002917	87-99-0	C00474				HEBKCHPVOIAQTA-SCDXWVJYSA-N	2.1235	2.41291	2.38459	2.307	0.0791126	0.0855696	0.124901	0.0965279	1.33699	0.00139362	0.00871479	0.0418413	-4.57893
137	Deoxyguanosine	3.95	level1			268.103	251.5	POS	C10H13N5O4	HMDB0000085	961-07-9	C00330	Carbohydrates	Nucleosides	Purine nucleos(t)ides	YKBGVTZYEHREMT-KVQBGUIXSA-N	0.00757067	0.00751557	0.00677361	0.00728662	0.00818234	0.0085511	0.00944145	0.00872496	1.14239	0.0338175	0.081844	1.1974	0.2599
138	Mevalonic acid	3.95	level1			147.066	251.1	NEG	C6H12O4	HMDB0000227	150-97-0	C00418	Fatty acids	Fatty Acids and Conjugates	Hydroxy fatty acids	KJTLQQUUPVSXIM-UHFFFAOYSA-N	0.0648568	0.0398625	0.0700227	0.0582474	0.00898197	0.00679844	0.0068866	0.00755567	1.31662	0.0314966	0.077598	0.129717	-2.94656
139	Inosine	3.95	level1			269.087	235.4	POS	C10H12N4O5	HMDB0000195	58-63-9	C00294	Carbohydrates	Nucleosides	Purine nucleos(t)ides	UGQMRVRMYYASKQ-KQYNXXCUSA-N	0.00908683	0.00776272	0.00894629	0.00859861	0.00350303	0.00296905	0.00328176	0.00325128	1.32827	0.000281207	0.00314834	0.378117	-1.4031
140	Leu-Ile	3.95	level1			243.171	204.9	NEG	C12H24N2O3	HMDB0028932	36077-41-5		Amino acids and Peptides	Small peptides	Dipeptides	AZLASBBHHSLQDB-GUBZILKMSA-N	0.575954	0.560309	0.56464	0.566968	1.05557	1.08237	1.08162	1.07319	1.34159	9.00376e-07	0.000213536	1.89285	0.920563
142	Ribothymidine	3.95	level1			257.077	148.7	NEG	C10H14N2O6	HMDB0000884	1463-10-1		Carbohydrates	Nucleosides	Pyrimidine nucleos(t)ides	DWRXFEITVBNRMK-JXOAFFINSA-N	0.122257	0.151185	0.148141	0.140528	0.0455461	0.0488509	0.0339444	0.0427805	1.3123	0.000670138	0.00540708	0.304428	-1.71583
143	Tropinone	3.95	level1			140.107	68.3	POS	C8H13NO	HMDB0304521	532-24-1	C00783	Alkaloids	Lysine alkaloids	Piperidine alkaloids	QQXLDOJGLXJCSE-UHFFFAOYSA-N	0.456154	0.41179	0.449737	0.439227	3.28001	2.69798	3.15122	3.04307	1.33945	0.00436683	0.018739	6.92824	2.79249
144	Tomatidine	3.95	level1			416.351	38.5	POS	C27H45NO2		77-59-8	C10826	Alkaloids	Pseudoalkaloids	Steroidal alkaloids	XYNPYHXGMWJBLV-VXPJTDKGSA-N	4.38072	5.2373	4.82144	4.81315	2.16537	0.939428	2.30702	1.80394	1.17131	0.00383011	0.0171136	0.374794	-1.41583
146	Thiophanate-Methyl	3.95	level1			343.052	35.7	POS	C12H14N4O4S2	HMDB0259025	23564-05-8	C14432	Alkaloids			QGHREAKMXXNCOA-UHFFFAOYSA-N	1.13686	1.1899	1.06289	1.12989	0.0191043	0.0076328	0.00642403	0.0110537	1.32849	0.000959191	0.00680475	0.00978304	-6.6755
148	(1S,4aR,10aR)-1,4a,7-trimethyl-7-vinyl-3,4,4b,5,6,9,10,10a-octahydro-2H-phenanthrene-1-carboxylic acid	3.94	level1			301.217	544.8	NEG	C20H30O2		471-74-9		Terpenoids	Diterpenoids	Pimarane and Isopimarane diterpenoids	MHVJRKBZMUDEEV-KGQMWYBFSA-N	0.0869719	0.103501	0.130908	0.107127	0.0282988	0.0194788	0.0146246	0.0208008	1.29597	0.00300603	0.0144974	0.194169	-2.36461
150	(4aS,6aS,6bR,8R,9R,10R,11R,12aR,14bS)-8,10,11-trihydroxy-9-(hydroxymethyl)-2,2,6a,6b,9,12a-hexamethyl-1,3,4,5,6,6a,7,8,8a,10,11,12,13,14b-tetradecahydropicene-4a-carboxylic acid	3.94	level1			503.337	424.1	NEG	C30H48O6		564-13-6		Terpenoids	Triterpenoids	Oleanane triterpenoids	IDQVFXZQPGAVAM-LWWFSHPVSA-N	0.00274018	0.00401801	0.00514337	0.00396719	0.374651	0.285999	0.364411	0.341687	1.33668	0.00677729	0.0254531	86.1283	6.42842
151	4-Aminobutyric acid	3.94	level1			102.056	47.2	NEG	C4H9NO2	HMDB0000112	56-12-2	C00334	Amino acids and Peptides	Small peptides	Aminoacids	BTCSSZJGUNDROE-UHFFFAOYSA-N	0.611462	0.636334	0.650686	0.632827	0.569433	0.519843	0.493152	0.527476	1.20128	0.0137535	0.0422144	0.833523	-0.262707
152	Caproic acid	3.94	level1			115.076	73.3	NEG	C6H12O2	HMDB0000535	142-62-1	C01585	Fatty acids	Fatty Acids and Conjugates	Branched fatty acids	FUZZWVXGSFPDMH-UHFFFAOYSA-N	0.893579	1.04674	0.973665	0.971327	0.504173	0.523925	0.474739	0.500946	1.32564	0.000536605	0.004703	0.515733	-0.955303
153	Pomolic acid	3.94	level1			471.347	51.4	NEG	C30H48O4		13849-91-7		Terpenoids	Triterpenoids	Ursane and Taraxastane triterpenoids	ZZTYPLSBNNGEIS-OPAXANQDSA-N	0.0166351	0.00779718	0.00808514	0.0108391	0.0272179	0.0432944	0.0358072	0.0354398	1.22257	0.0108792	0.0356443	3.26961	1.70912
154	(1S,2R,4aS,6aS,6bR,10R,11R,12aR,14bS)-10,11-dihydroxy-1,2,6a,6b,9,9,12a-heptamethyl-2,3,4,5,6,6a,7,8,8a,10,11,12,13,14b-tetradecahydro-1H-picene-4a-carboxylic acid	3.94	level1			471.347	51.4	NEG	C30H48O4		4547-24-4		Terpenoids	Triterpenoids	Ursane and Taraxastane triterpenoids	HFGSQOYIOKBQOW-WZSFHCERSA-N	0.0166351	0.00779718	0.00808514	0.0108391	0.0272179	0.0432944	0.0358072	0.0354398	1.22257	0.0108792	0.0356443	3.26961	1.70912
155	Arachidonic acid (AA)	3.94	level1			303.233	545.9	NEG	C20H32O2	HMDB0001043	506-32-1	C00219	Fatty acids	Fatty Acids and Conjugates	Unsaturated fatty acids	YZXBAPSDXZZRGB-DOFZRALJSA-N	1.69171	2.02185	1.94915	1.88757	0.27921	0.292433	0.289962	0.287201	1.3404	0.00384602	0.0171582	0.152154	-2.71639
156	3-Methyl-2-oxovaleric acid	3.94	level1			129.056	245.9	NEG	C6H10O3	HMDB0000491	1460-34-0	C03465	Fatty acids	Fatty Acids and Conjugates	Branched fatty acids	JVQYSWDUAOAHFM-UHFFFAOYSA-N	0.119533	0.130221	0.122006	0.12392	0.0636505	0.0711253	0.0615504	0.0654421	1.32645	0.000176309	0.0024257	0.528098	-0.921122
157	Tropine	3.94	level1			142.122	46.5	POS	C8H15NO	HMDB0259297	120-29-6	C02066	Alkaloids	Ornithine alkaloids	Tropane alkaloids	CYHOMWAPJJPNMW-UHFFFAOYSA-N	2.50802	2.16759	2.50333	2.39298	4.7325	4.36573	4.62717	4.57513	1.32494	0.000154625	0.00224788	1.9119	0.935005
159	DEHP	3.94	level1			391.283	568.4	POS	C24H38O4	HMDB0249243	117-81-7	C03690	Shikimates and Phenylpropanoids	Phenolic acids (C6-C1)	Shikimic acids and derivatives	BJQHLKABXJIVAM-UHFFFAOYSA-N	0.778514	0.703307	0.693546	0.725123	0.997159	0.929684	0.920384	0.949076	1.27738	0.00344693	0.0159156	1.30885	0.388299
160	Pentadecanoic acid	3.94	level1			241.217	556.3	NEG	C15H30O2	HMDB0000826	1002-84-2	C16537	Fatty acids	Fatty Acids and Conjugates	Branched fatty acids	WQEPLUUGTLDZJY-UHFFFAOYSA-N	2.73596	3.05495	2.86304	2.88465	3.42198	3.53431	3.29235	3.41621	1.22332	0.0102007	0.0340209	1.18427	0.244003
161	(Z)-2-hydroxyoctadec-9-enoic acid	3.94	level1			297.243	549.8	NEG	C18H34O3		56472-29-8		Fatty acids	Fatty Acids and Conjugates	Hydroxy fatty acids	JBSOOFITVPOOSY-KTKRTIGZSA-N	0.566382	0.511043	0.510513	0.529313	0.179815	0.162499	0.170405	0.170906	1.33764	4.84762e-05	0.00119835	0.322884	-1.63091
162	Ursolic acid	3.94	level1			455.353	542.8	NEG	C30H48O3				Terpenoids	Triterpenoids	Ursane and Taraxastane triterpenoids	WCGUUGGRBIKTOS-GPOJBZKASA-N	0.0350789	0.0291573	0.0343247	0.0328536	0.550805	0.483911	0.548064	0.527593	1.34084	0.00182484	0.0104094	16.0589	4.0053
163	Eicosapentaenoic acid	3.94	level1			301.217	529.5	NEG	C20H30O2	HMDB0001999	10417-94-4	C06428	Fatty acids	Fatty Acids and Conjugates	Unsaturated fatty acids	JAZBEHYOTPTENJ-JLNKQSITSA-N	2.31937	3.14623	2.83484	2.76681	0.110158	0.0992288	0.103047	0.104145	1.34042	0.00809115	0.0288668	0.0376407	-4.73156
171	(2R,3R,4S,5S,6R)-2-[(2E)-3,7-dimethylocta-2,6-dienoxy]-6-[[(2S,3R,4S,5R)-3,4,5-trihydroxytetrahydropyran-2-yl]oxymethyl]tetrahydropyran-3,4,5-triol	3.94	level1			429.213	348.3	NEG	C21H36O10		150995-11-2		Terpenoids	Monoterpenoids	Acyclic monoterpenoids	IEGFOTASSBZIBZ-QLPUMLPOSA-N	0.217214	0.25227	0.222721	0.230735	0.554739	0.537432	0.507316	0.533162	1.33146	6.75835e-05	0.00142607	2.31071	1.20834
173	(4E)-8-hydroxy-4-(2-hydroxy-1-methyl-ethylidene)-10-oxatricyclo[7.2.1.01,5]dodecane-8-carboxylic acid	3.94	level1			281.139	263.9	NEG	C15H22O5				Terpenoids	Sesquiterpenoids	Daucane sesquiterpenoids	QYINOGPWFQBOJX-MDZDMXLPSA-N	0.134635	0.153242	0.144176	0.144017	0.0308961	0.0316042	0.0264184	0.0296396	1.33779	3.42255e-05	0.00100402	0.205805	-2.28065
174	5-acetyl-2-hydroxy-benzoic acid	3.94	level1			179.035	263.4	NEG	C9H8O4		13110-96-8		Shikimates and Phenylpropanoids	Phenolic acids (C6-C1)	Simple phenolic acids	NZRDKNBIPVLNHA-UHFFFAOYSA-N	0.174486	0.155348	0.225252	0.185029	0.0439934	0.0449314	0.0505876	0.0465042	1.32314	0.0210678	0.0575427	0.251335	-1.99232
175	2-Hydroxyhexanoic acid	3.94	level1			131.071	262.6	NEG	C6H12O3	HMDB0001624	6064-63-7		Fatty acids	Fatty Acids and Conjugates	Hydroxy fatty acids	NYHNVHGFPZAZGA-UHFFFAOYSA-N	0.721291	0.809225	0.761607	0.764041	0.597047	0.619248	0.581129	0.599141	1.28248	0.00400298	0.0176351	0.784174	-0.350754
176	2-Hydroxycinnamic acid	3.94	level1			163.04	229.1	NEG	C9H8O3	HMDB0002641	583-17-5	C01772	Shikimates and Phenylpropanoids	Phenylpropanoids (C6-C3)	Cinnamic acids and derivatives	PMOWTIHVNWZYFI-AATRIKPKSA-N	0.0416675	0.0414832	0.0422815	0.0418107	0.0220903	0.0305443	0.0161712	0.0229353	1.16222	0.0450923	0.101871	0.54855	-0.866306
177	Salidroside	3.94	level1			299.114	226.1	NEG	C14H20O7		10338-51-9	C06046	Shikimates and Phenylpropanoids	Phenylethanoids (C6-C2)	Phenylethanoids	ILRCGYURZSFMEG-RKQHYHRCSA-N	0.0630955	0.0506629	0.0656458	0.0598014	0.159982	0.131113	0.144148	0.145081	1.31116	0.000867546	0.00638015	2.42605	1.27861
180	Allopurinol-1-ribonucleoside	3.94	level1			267.073	98.9	NEG	C10H12N4O5	HMDB0000481	16220-07-8		Carbohydrates	Nucleosides	Purine nucleos(t)ides	KFQUAMTWOJHPEJ-DAGMQNCNSA-N	0.278319	0.278262	0.289573	0.282051	0.109331	0.108769	0.101203	0.106434	1.34022	2.77304e-06	0.000319945	0.377358	-1.40599
181	Nicotinate	3.94	level1			122.025	65.6	NEG	C6H5NO2	HMDB0001488	59-67-6	C00253	Alkaloids	Nicotinic acid alkaloids	Pyridine alkaloids	PVNIIMVLHYAWGP-UHFFFAOYSA-N	0.290843	0.324202	0.283824	0.299623	0.241067	0.259944	0.265494	0.255502	1.13508	0.0381725	0.0897232	0.852744	-0.229815
183	Caplamin	3.94	level1			130.087	52.8	NEG	C6H13NO2	HMDB0001901	60-32-2	C02378	Fatty acids	Fatty Acids and Conjugates	Amino fatty acids	SLXKOJJOQWFEFD-UHFFFAOYSA-N	3.42893	3.63915	3.5397	3.53593	2.54852	2.46504	2.29085	2.4348	1.31861	0.000346106	0.0035629	0.68859	-0.538284
185	Trigonelline	3.94	level1			138.055	45.6	POS	C7H7NO2	HMDB0000875	535-83-1	C01004	Alkaloids	Nicotinic acid alkaloids	Pyridine alkaloids	WWNNZCOKKKDOPX-UHFFFAOYSA-N	0.417793	0.38675	0.396084	0.400209	0.0679615	0.0749204	0.0674452	0.070109	1.34091	4.10384e-06	0.000374674	0.175181	-2.51308
186	Turanose	3.94	level1			341.108	45.3	NEG	C12H22O11		547-25-1		Carbohydrates	Saccharides	Disaccharides	SEWFWJUQVJHATO-UHFFFAOYSA-N	6.77195	7.235	7.1547	7.05388	10.69	10.8313	9.59982	10.3737	1.30897	0.00131807	0.0083951	1.47064	0.556445
187	(2R,3S,4S,5R,6R)-2-(hydroxymethyl)-6-[(2S,3R,4S,5S,6R)-3,4,5-trihydroxy-6-(hydroxymethyl)tetrahydropyran-2-yl]oxy-tetrahydropyran-3,4,5-triol	3.94	level1			341.108	45.3	NEG	C12H22O11		585-91-1		Carbohydrates	Saccharides	Disaccharides	HDTRYLNUVZCQOY-BTLHAWITSA-N	6.77195	7.235	7.1547	7.05388	10.69	10.8313	9.59982	10.3737	1.30897	0.00131807	0.0083951	1.47064	0.556445
188	Galactose	3.94	level1			203.052	43.1	POS	C6H12O6	HMDB0000143	10257-28-0	C00984	Carbohydrates	Saccharides	Monosaccharides	WQZGKKKJIJFFOK-MCPPVLNHSA-N	0.699653	0.770259	0.703672	0.724528	2.83787	2.94488	2.77539	2.85272	1.34042	2.57448e-06	0.000312898	3.93735	1.97722
189	Fructose	3.94	level1			203.052	43.1	POS	C6H12O6	HMDB0000660	53188-23-1	C02336	Carbohydrates	Saccharides	Monosaccharides	RFSUNEUAIZKAJO-ARQDHWQXSA-N	0.699653	0.770259	0.703672	0.724528	2.83787	2.94488	2.77539	2.85272	1.34042	2.57448e-06	0.000312898	3.93735	1.97722
190	Sucrose	3.94	level1			325.112	47.7	POS	C12H22O11	HMDB0000258	57-50-1	C00089	Carbohydrates	Saccharides	Disaccharides	CZMRCDWAGMRECN-UGDNZRGBSA-N	0.103112	0.10457	0.0893876	0.0990231	0.20741	0.209256	0.212781	0.209816	1.3307	2.6281e-05	0.000881332	2.11886	1.08329
191	trans-Aconitic acid	3.94	level1			173.009	455	NEG	C6H6O6	HMDB0000958	4023-65-8	C02341	Fatty acids	Fatty Acids and Conjugates	Dicarboxylic acids	GTZCVFVGUGFEME-HNQUOIGGSA-N	6.0462	6.12023	6.15999	6.10881	9.57464	9.35968	9.05084	9.32838	1.33797	3.22545e-05	0.00097476	1.52704	0.610736
192	Malic acid	3.94	level1			133.014	421.7	NEG	C4H6O5	HMDB0000744	6915-15-7	C00149	Fatty acids	Fatty Acids and Conjugates	Dicarboxylic acids	BJEPYKJPYRNKOW-UHFFFAOYSA-N	37.9659	38.4692	38.8307	38.4219	31.7392	27.9204	33.1554	30.9384	1.21229	0.00912786	0.0314543	0.805226	-0.312534
193	Glucuronic acid	3.94	level1			193.035	405.1	NEG	C6H10O7	HMDB0000127	528-16-5|6556-12-3|576-37-4|72121-88-1	C00191	Carbohydrates	Saccharides	Monosaccharides	AEMOLEFTQBMNLQ-AQKNRBDQSA-N	0.0513226	0.0493548	0.0537903	0.0514892	0.0461049	0.0430281	0.0451597	0.0447642	1.21835	0.0128968	0.0403092	0.86939	-0.201924
194	Fumaric acid	3.94	level1			115.004	393	NEG	C4H4O4	HMDB0000134	110-17-8	C00122	Fatty acids	Fatty Acids and Conjugates	Dicarboxylic acids	VZCYOOQTPOCHFL-OWOJBTEDSA-N	2.53291	2.73451	2.69209	2.65317	1.68256	1.68841	1.5805	1.65049	1.33111	0.000143204	0.00215253	0.622083	-0.684821
195	Malonic acid	3.94	level1			103.003	392.4	NEG	C3H4O4	HMDB0000691	141-82-2	C00383	Fatty acids	Fatty Acids and Conjugates	Dicarboxylic acids	OFOBLEOULBTSOW-UHFFFAOYSA-N	0.95508	1.01319	1.00053	0.989599	0.477909	0.464623	0.566335	0.502956	1.31926	0.000182411	0.00247165	0.508242	-0.976412
196	Shikimic acid	3.94	level1			173.045	373.2	NEG	C7H10O5	HMDB0003070	138-59-0	C00493	Shikimates and Phenylpropanoids	Phenolic acids (C6-C1)	Shikimic acids and derivatives	JXOHGGNKMLTUBP-HSUXUTPPSA-N	0.17449	0.171826	0.181711	0.176009	0.122557	0.117688	0.115457	0.118567	1.33232	9.23187e-05	0.00168386	0.673644	-0.569941
197	Carnitine	3.94	level1			162.112	370.2	POS	C7H15NO3	HMDB0000062	541-15-1	C00318	Fatty acids	Fatty esters	Fatty acyl carnitines	PHIQHXFUZVPYII-ZCFIWIBFSA-N	0.506397	0.534787	0.526229	0.522471	0.175969	0.179366	0.163895	0.173077	1.34037	3.44515e-06	0.000345953	0.331266	-1.59394
198	Taurine	3.94	level1			124.007	314.1	NEG	C2H7NO3S	HMDB0000251	107-35-7	C00245				XOAAWQZATWQOTB-UHFFFAOYSA-N	0.0328586	0.0333362	0.0366529	0.0342826	0.043567	0.0449968	0.0454484	0.0446707	1.29323	0.00141336	0.00879679	1.30302	0.381854
199	H-Val-Ala-OH	3.94	level1			187.108	274.6	NEG	C8H16N2O3	HMDB0029120	27493-61-4		Amino acids and Peptides	Small peptides	Dipeptides	HSRXSKHRSXRCFC-WDSKDSINSA-N	0.367424	0.333124	0.358962	0.35317	0.86171	0.884096	0.896622	0.88081	1.33939	3.41941e-06	0.000345803	2.49401	1.31847
204	N2,N2-Dimethylguanosine	3.94	level1			312.13	208.8	POS	C12H17N5O5	HMDB0004824	2140-67-2		Carbohydrates	Nucleosides	Purine nucleos(t)ides	RSPURTUNRHNVGF-IOSLPCCCSA-N	0.038903	0.0344307	0.0376556	0.0369964	0.0671326	0.0615796	0.0783022	0.0690048	1.30129	0.00327753	0.0153757	1.86517	0.899311
205	Sipeimine	3.94	level1			412.32	182.9	POS	C27H43NO3		61825-98-7		Alkaloids	Pseudoalkaloids	Steroidal alkaloids	IQDIERHFZVCNRZ-LRCDAWNTSA-N	0.0175191	0.0178796	0.0172553	0.0175513	0.0249511	0.0237429	0.0227445	0.0238128	1.31953	0.000701376	0.00556215	1.35675	0.440159
207	5-hydroxy-6,8-dimethoxy-7-[(2S,3R,4S,5S,6R)-3,4,5-trihydroxy-6-(hydroxymethyl)tetrahydropyran-2-yl]oxy-chromen-2-one	3.94	level1			399.092	159.2	NEG	C17H20O11				Shikimates and Phenylpropanoids	Coumarins	Simple coumarins	KDWWYRPEBULRGU-KIZWGXMFSA-N	0.396054	0.44291	0.42033	0.419765	0.133678	0.141305	0.136297	0.137093	1.34	3.27151e-05	0.00098207	0.326595	-1.61442
208	Homoveratric acid	3.94	level1			195.066	151.5	NEG	C10H12O4	HMDB0000434	93-40-3		Shikimates and Phenylpropanoids	Phenolic acids (C6-C1)	Simple phenolic acids	WUAXWQRULBZETB-UHFFFAOYSA-N	0.158432	0.149605	0.157216	0.155084	0.214668	0.223188	0.216716	0.218191	1.33212	7.47386e-05	0.00150374	1.40692	0.492536
209	Deoxyadenosine	3.94	level1			252.108	147.8	POS	C10H13N5O3	HMDB0000101	958-09-8	C00559	Carbohydrates	Nucleosides	Purine nucleos(t)ides	OLXZPDWKRNYJJZ-RRKCRQDMSA-N	0.0472065	0.0450468	0.0485747	0.0469427	0.0179946	0.0223322	0.0192166	0.0198478	1.32671	8.04925e-05	0.00156409	0.422809	-1.24192
212	Valproic acid	3.94	level1			143.107	57.4	NEG	C8H16O2	HMDB0001877	99-66-1	C07185	Fatty acids	Fatty Acids and Conjugates	Branched fatty acids	NIJJYAXOARWZEE-UHFFFAOYSA-N	0.0435628	0.0578768	0.0585042	0.0533146	0.0359455	0.0426636	0.0356833	0.0380975	1.11215	0.0476087	0.106099	0.714578	-0.484836
213	2-Piperidone	3.94	level1			100.075	54.7	POS	C5H9NO	HMDB0011749	675-20-7		Alkaloids	Lysine alkaloids	Piperidine alkaloids	XUWHAWMETYGRKB-UHFFFAOYSA-N	0.145531	0.158536	0.165604	0.156557	0.0991243	0.0903338	0.09787	0.095776	1.31812	0.000723036	0.00567329	0.611764	-0.708954
217	Cer(d18:1/16:0)	3.94	level1			538.518	34	POS	C34H67NO3	HMDB0004949	24696-26-2		Fatty acids	Sphingolipids	Ceramides	YDNKGFDKKRUKPY-UHFFFAOYSA-N	0.00968816	0.00973408	0.00855931	0.00932719	0.0126431	0.010661	0.0125702	0.0119581	1.16992	0.0251476	0.0657038	1.28207	0.358475
218	4-Cresol sulfate	3.94	level1			187.007	25.4	NEG	C7H8O4S	HMDB0011635	91978-69-7		Shikimates and Phenylpropanoids	Phenolic acids (C6-C1)	Simple phenolic acids	WGNAKZGUSRVWRH-UHFFFAOYSA-N	0.0223139	0.01645	0.0255471	0.021437	0.142468	0.137824	0.157045	0.145779	1.32953	4.06929e-05	0.00109594	6.80034	2.76561
219	Norepinephrine	3.94	level1			152.07	223.4	POS	C8H11NO3	HMDB0000216	51-41-2	C00547	Alkaloids	Tyrosine alkaloids	Phenylethylamines	SFLSHLFXELFNJZ-QMMMGPOBSA-N	0.00704562	0.00689897	0.0074817	0.00714209	0.00606237	0.00518476	0.00619225	0.00581313	1.15741	0.0212894	0.0579908	0.813924	-0.297033
220	5-Aminopentanoic acid	3.93	level1			116.072	47	NEG	C5H11NO2	HMDB0003355	660-88-8	C00431	Fatty acids	Fatty Acids and Conjugates	Amino fatty acids	JJMDCOVWQOJGCB-UHFFFAOYSA-N	0.665947	0.70424	0.705484	0.69189	0.453886	0.408584	0.386733	0.416401	1.31666	0.000310618	0.00334367	0.601831	-0.73257
221	(1R,2R,4aS,6aS,6bR,10S,11R,12aR)-1,10,11-trihydroxy-1,2,6a,6b,9,9,12a-heptamethyl-2,3,4,5,6,6a,7,8,8a,10,11,12,13,14b-tetradecahydropicene-4a-carboxylic acid	3.93	level1			487.342	448.3	NEG	C30H48O5		53155-25-2		Terpenoids	Triterpenoids	Ursane and Taraxastane triterpenoids	OXVUXGFZHDKYLS-YFIQRXMRSA-N	0.0294846	0.0491338	0.0245851	0.0344012	1.37455	2.03067	1.36112	1.58878	1.33132	0.01952	0.0544269	46.1839	5.52932
222	(4aS,6aS,6bR,9R,10R,11R,12aR)-10,11-dihydroxy-9-(hydroxymethyl)-2,2,6a,6b,9,12a-hexamethyl-1,3,4,5,6,6a,7,8,8a,10,11,12,13,14b-tetradecahydropicene-4a-carboxylic acid	3.93	level1			487.342	448.3	NEG	C30H48O5		465-00-9		Terpenoids	Triterpenoids	Oleanane triterpenoids	RWNHLTKFBKYDOJ-IJDLJTCJSA-N	0.0294846	0.0491338	0.0245851	0.0344012	1.37455	2.03067	1.36112	1.58878	1.33132	0.01952	0.0544269	46.1839	5.52932
223	2-Methylvaleric acid	3.93	level1			115.076	73.3	NEG	C6H12O2	HMDB0031580	22160-39-0		Fatty acids	Fatty Acids and Conjugates	Branched fatty acids	OVBFMEVBMNZIBR-UHFFFAOYSA-N	0.893579	1.04674	0.973665	0.971327	0.504173	0.523925	0.474739	0.500946	1.32564	0.000536605	0.004703	0.515733	-0.955303
224	(2S,4aS,6aS,6bR,10S,12aS,14bS)-10-hydroxy-2,4a,6a,6b,9,9,12a-heptamethyl-13-oxo-3,4,5,6,6a,7,8,8a,10,11,12,14b-dodecahydro-1H-picene-2-carboxylic acid	3.93	level1			469.332	499.3	NEG	C30H46O4		1449-05-4		Terpenoids	Triterpenoids	Oleanane triterpenoids	MPDGHEJMBKOTSU-IYTIXWHISA-N	1.17468e-05	1.2935e-05	1.24167e-05	1.23661e-05	0.0258393	0.0222737	0.0279165	0.0253431	1.34218	0.0042045	0.0182519	2049.4	11.001
225	(4aS,6aS,6bR,10S,12aR)-10-hydroxy-2,2,6a,6b,9,9,12a-heptamethyl-1,3,4,5,6,6a,7,8,8a,10,11,12,13,14b-tetradecahydropicene-4a-carboxylic acid	3.93	level1			455.353	542.8	NEG	C30H48O3		508-02-1		Terpenoids	Triterpenoids	Oleanane triterpenoids	MIJYXULNPSFWEK-FQRDBSNUSA-N	0.0350789	0.0291573	0.0343247	0.0328536	0.550805	0.483911	0.548064	0.527593	1.34084	0.00182484	0.0104094	16.0589	4.0053
227	(2R,3R,4S,5S,6R)-2-[(2E)-3,7-dimethylocta-2,6-dienoxy]-6-[[(2S,3R,4S,5S)-3,4,5-trihydroxytetrahydropyran-2-yl]oxymethyl]tetrahydropyran-3,4,5-triol	3.93	level1			429.213	348.3	NEG	C21H36O10		152520-94-0		Terpenoids	Monoterpenoids	Acyclic monoterpenoids	IEGFOTASSBZIBZ-WRRPXPPESA-N	0.217214	0.25227	0.222721	0.230735	0.554739	0.537432	0.507316	0.533162	1.33146	6.75835e-05	0.00142607	2.31071	1.20834
228	Hydroxyisocaproic acid	3.93	level1			131.071	262.6	NEG	C6H12O3	HMDB0000665	498-36-2	C03264	Fatty acids	Fatty Acids and Conjugates	Branched fatty acids	LVRFTAZAXQPQHI-UHFFFAOYSA-N	0.721291	0.809225	0.761607	0.764041	0.597047	0.619248	0.581129	0.599141	1.28248	0.00400298	0.0176351	0.784174	-0.350754
229	Palatinose (hydrate)	3.93	level1			341.108	45.3	NEG	C12H22O11		13718-94-0	C01742	Carbohydrates	Saccharides	Disaccharides	PVXPPJIGRGXGCY-TZLCEDOOSA-N	6.77195	7.235	7.1547	7.05388	10.69	10.8313	9.59982	10.3737	1.30897	0.00131807	0.0083951	1.47064	0.556445
230	Galactinol	3.93	level1			341.108	45.3	NEG	C12H22O11		3687-64-7		Carbohydrates	Polyols	Cyclitols	VCWMRQDBPZKXKG-BJBMSVMHSA-N	6.77195	7.235	7.1547	7.05388	10.69	10.8313	9.59982	10.3737	1.30897	0.00131807	0.0083951	1.47064	0.556445
231	Allose	3.93	level1			203.052	43.1	POS	C6H12O6	HMDB0062473	39392-62-6	C01487	Carbohydrates	Saccharides	Monosaccharides	GZCGUPFRVQAUEE-OBOOZECYSA-N	0.699653	0.770259	0.703672	0.724528	2.83787	2.94488	2.77539	2.85272	1.34042	2.57448e-06	0.000312898	3.93735	1.97722
233	Erucic acid	3.93	level1			337.311	609.1	NEG	C22H42O2	HMDB0002068	112-86-7	C08316	Fatty acids	Fatty Acids and Conjugates	Unsaturated fatty acids	DPUOLQHDNGRHBS-KTKRTIGZSA-N	0.0418565	0.040767	0.0453129	0.0426455	0.0386812	0.0341642	0.0319572	0.0349342	1.13086	0.0327852	0.0799764	0.819177	-0.287753
235	Tris(2,4-di-tert-butylphenyl)phosphate	3.93	level1			663.452	567.5	POS	C42H63O4P		31570-04-4		Shikimates and Phenylpropanoids	Flavonoids	Flavanones	AZSKHRTUXHLAHS-UHFFFAOYSA-N	0.0725677	0.0564647	0.0720117	0.0670147	0.091798	0.087272	0.0807452	0.0866051	1.10621	0.0337926	0.0817988	1.29233	0.369974
236	(3R,4R,6aR,6bS,8aR,11R,12S,12aR,14bS)-3-acetoxy-4,6a,6b,8a,11,12,14b-heptamethyl-14-oxo-1,2,3,4a,5,6,7,8,9,10,11,12,12a,14a-tetradecahydropicene-4-carboxylic acid	3.93	level1			513.357	533.3	POS	C32H48O5		67416-61-9		Terpenoids	Triterpenoids	Serratane triterpenoids	HMMGKOVEOFBCAU-MFIYSICPSA-N	0.00107226	0.000783422	0.00104065	0.000965445	0.00019956	2.74836e-06	2.62293e-06	6.83106e-05	1.12454	0.00134342	0.0085027	0.0707555	-3.82101
237	Palmitamide	3.93	level1			256.263	528.9	POS	C16H33NO	HMDB0012273	629-54-9		Fatty acids	Fatty amides	Primary amides	HSEMFIZWXHQJAE-UHFFFAOYSA-N	0.023197	0.0210843	0.0246994	0.0229935	0.0287011	0.0256013	0.0272877	0.0271967	1.11618	0.0381222	0.0896381	1.1828	0.242201
238	LPE(16:0)	3.93	level1			452.278	521.5	NEG	C21H44NO7P	HMDB0011503	53862-35-4		Fatty acids	Glycerophospholipids	Glycerophosphoethanolamines	YVYMBNSKXOXSKW-HXUWFJFHSA-N	2.46202	2.76694	2.63811	2.62236	1.86199	2.21268	2.30072	2.12513	1.10884	0.0363063	0.0863703	0.81039	-0.303312
243	Ligustilide	3.93	level1			191.106	428.8	POS	C12H14O2	HMDB0302720	4431-01-0	C16987	Polyketides	Cyclic polyketides	Phthalide derivatives	IQVQXVFMNOFTMU-FLIBITNWSA-N	0.310988	0.342562	0.392434	0.348661	0.143263	0.15978	0.140515	0.147852	1.32129	0.00119965	0.00787456	0.424058	-1.23767
245	7,3',4'-Trihydroxyflavone	3.93	level1			269.045	319.8	NEG	C15H10O5		2150-11-0		Shikimates and Phenylpropanoids	Flavonoids	Flavones	PVFGJHYLIHMCQD-UHFFFAOYSA-N	0.243286	0.207949	0.244742	0.231992	0.00265566	0.00276558	0.00115632	0.00219252	1.33243	0.00268745	0.0134702	0.00945084	-6.72534
246	Sulfuretin	3.93	level1			269.045	319.8	NEG	C15H10O5		120-05-8	C08730	Shikimates and Phenylpropanoids	Flavonoids	Aurones	RGNXWPVNPFAADO-NSIKDUERSA-N	0.243286	0.207949	0.244742	0.231992	0.00265566	0.00276558	0.00115632	0.00219252	1.33243	0.00268745	0.0134702	0.00945084	-6.72534
247	2-(1-carboxyethyl)-5-methyl-cyclopentanecarboxylic acid	3.93	level1			199.097	315.2	NEG	C10H16O4		32603-11-5		Amino acids and Peptides	Small peptides	Aminoacids	OIFCPZGZZQQDNO-UHFFFAOYSA-N	0.0389723	0.0449139	0.0393979	0.0410947	0.0663308	0.0628058	0.0604933	0.06321	1.30352	0.000984115	0.00691587	1.53815	0.6212
248	Lonicerin	3.93	level1			593.151	289.5	NEG	C27H30O15	HMDB0005799	25694-72-8	C12630	Shikimates and Phenylpropanoids	Flavonoids	Flavones	SHPPXMGVUDNKLV-KMFFXDMSSA-N	0.0574272	0.0669238	0.0601473	0.0614994	0.220005	0.200639	0.219036	0.213227	1.33715	2.53664e-05	0.000866555	3.46713	1.79374
249	Acetovanillone	3.93	level1			165.056	272.4	NEG	C9H10O3	HMDB0247918	498-02-2	C11380	Shikimates and Phenylpropanoids			DFYRUELUNQRZTB-UHFFFAOYSA-N	0.167214	0.198754	0.19037	0.185446	0.0357349	0.039621	0.0351005	0.0368188	1.33866	0.00339375	0.0157494	0.198542	-2.33248
250	1-[4-hydroxy-2-methyl-6-[(2S,3R,4S,5S,6R)-3,4,5-trihydroxy-6-(hydroxymethyl)tetrahydropyran-2-yl]oxy-phenyl]ethanone	3.93	level1			327.109	247.8	NEG	C15H20O8				Polyketides	Phloroglucinols	Acyl phloroglucinols	GXLXFBBEKMNRQK-TVKJYDDYSA-N	0.0588748	0.0597132	0.059816	0.059468	0.0785848	0.0803804	0.0794765	0.0794806	1.33992	4.75342e-06	0.000401847	1.33653	0.418489
251	2-acetylbenzoic acid	3.93	level1			163.04	245.9	NEG	C9H8O3		577-56-0		Shikimates and Phenylpropanoids	Phenolic acids (C6-C1)	Simple phenolic acids	QDAWXRKTSATEOP-UHFFFAOYSA-N	0.217585	0.230659	0.225849	0.224698	0.15073	0.156533	0.155811	0.154358	1.33492	7.6752e-05	0.00152616	0.686957	-0.541709
252	Ile-Leu	3.93	level1			245.185	213	POS	C12H24N2O3	HMDB0028911	26462-22-6		Amino acids and Peptides	Small peptides	Dipeptides	JWBXCSQZLLIOCI-GUBZILKMSA-N	0.0401398	0.0376783	0.0362475	0.0380219	0.0792167	0.08502	0.0775967	0.0806111	1.33489	7.23036e-05	0.00147656	2.12012	1.08415
253	Guanosine	3.93	level1			284.098	104.5	POS	C10H13N5O5	HMDB0000133	118-00-3	C00387	Carbohydrates	Nucleosides	Purine nucleos(t)ides	NYHBQMYGNKIUIF-UUOKFMHZSA-N	0.294805	0.259009	0.263551	0.272455	0.149486	0.146636	0.156476	0.150866	1.32632	0.000472258	0.00433724	0.553728	-0.85275
254	Butyrylcarnitine (Car(4:0))	3.93	level1			214.143	97.8	POS	C11H21NO4	HMDB0002013	25576-40-3	C02862	Fatty acids	Fatty esters	Fatty acyl carnitines	QWYFHHGCZUCMBN-SECBINFHSA-N	0.0190074	0.0189153	0.018119	0.0186806	0.0137538	0.0132527	0.0135722	0.0135262	1.33301	8.45606e-05	0.00160451	0.724078	-0.465783
256	L-​Leucyl-​L-​alanine	3.93	level1			203.138	53	POS	C9H18N2O3	HMDB0028922	7298-84-2		Amino acids and Peptides	Small peptides	Dipeptides	HSQGMTRYSIHDAC-BQBZGAKWSA-N	0.118872	0.118596	0.0994352	0.112301	0.184887	0.185165	0.205206	0.191753	1.30138	0.00103384	0.00713184	1.70749	0.771875
257	Pyrrolidine	3.93	level1			72.0806	47	POS	C4H9N	HMDB0031641	123-75-1		Alkaloids	Lysine alkaloids		RWRDLPDLKQPQOW-UHFFFAOYSA-N	0.90468	0.874513	0.904683	0.894625	0.784379	0.772037	0.71146	0.755959	1.25363	0.00492899	0.0203737	0.845001	-0.242976
258	Gluconic acid	3.93	level1			195.051	41.4	NEG	C6H12O7	HMDB0000625	526-95-4	C00257	Carbohydrates	Saccharides	Monosaccharides	RGHNJXZEOKUKBD-SQOUGZDYSA-N	0.882292	0.917764	0.897718	0.899258	0.639051	0.642804	0.644287	0.642047	1.33957	0.00128714	0.00825843	0.713974	-0.486056
259	Proline	3.93	level1			116.07	45.7	POS	C5H9NO2	HMDB0000162	147-85-3	C00148	Amino acids and Peptides	Small peptides	Aminoacids	ONIBWKKTOPOVIA-BYPYZUCNSA-N	9.2634	9.83591	8.95309	9.3508	1.74609	1.92158	1.79049	1.81938	1.34098	8.96884e-06	0.000529396	0.19457	-2.36164
261	Glucose 6-phosphate	3.93	level1			259.022	492.4	NEG	C6H13O9P	HMDB0001401	56-73-5	C00092	Carbohydrates	Saccharides	Monosaccharides	NBSCHQHZLSJFNQ-GASJEMHNSA-N	0.026408	0.0213579	0.0239083	0.0238914	0.0621541	0.0526738	0.07028	0.0617026	1.31219	0.00203019	0.0111724	2.58263	1.36884
262	Saccharopine	3.93	level1			277.139	469.1	POS	C11H20N2O6	HMDB0000279	997-68-2	C00449	Amino acids and Peptides	Small peptides	Aminoacids	ZDGJAHTZVHVLOT-YUMQZZPRSA-N	0.0119267	0.0107971	0.0110319	0.0112519	0.00604825	0.00639477	0.00649317	0.00631206	1.33108	0.000181321	0.00246442	0.560978	-0.833983
263	Aspartate	3.93	level1			134.044	423.4	POS	C4H7NO4	HMDB0000191	56-84-8	C00049	Amino acids and Peptides	Small peptides	Aminoacids	CKLJMWTZIZZHCS-REOHCLBHSA-N	0.0699011	0.0593319	0.0664855	0.0652395	0.153777	0.136569	0.154424	0.148257	1.32763	0.00023325	0.00281584	2.2725	1.18428
264	myo-Inositol	3.93	level1			179.056	409	NEG	C6H12O6	HMDB0000211	87-89-8	C00137	Carbohydrates	Polyols	Cyclitols	CDAISMWEOUEBRE-UHFFFAOYSA-N	2.61931	2.72284	2.76682	2.70299	3.30407	3.22338	3.20835	3.24527	1.31472	0.00050936	0.00455543	1.20062	0.263782
265	Mesaconic acid	3.93	level1			129.019	391	NEG	C5H6O4	HMDB0000749	498-24-8	C01732	Fatty acids	Fatty Acids and Conjugates	Dicarboxylic acids	HNEGQIOMVPPMNR-NSCUHMNNSA-N	0.116433	0.123665	0.125298	0.121799	0.221911	0.236293	0.309001	0.255735	1.29071	0.0370177	0.0876608	2.09965	1.07015
266	alpha-Ketoglutaric acid (alpha-KG)	3.93	level1			145.014	385.8	NEG	C5H6O5	HMDB0000208	328-50-7	C00026	Fatty acids	Fatty Acids and Conjugates	Dicarboxylic acids	KPGXRSRHYNQIFN-UHFFFAOYSA-N	8.18436	8.31366	8.48219	8.32674	2.42294	2.29368	2.28693	2.33452	1.34165	4.09886e-07	0.000160849	0.280364	-1.83463
267	Creatine	3.93	level1			132.076	367.8	POS	C4H9N3O2	HMDB0000064	57-00-1	C00300	Amino acids and Peptides	Small peptides	Aminoacids	CVSVTCORWBXHQV-UHFFFAOYSA-N	0.00707271	0.00467927	0.00495748	0.00556982	0.0177531	0.0199275	0.0188443	0.0188417	1.31312	0.00017374	0.00240406	3.38281	1.75822
268	N,N'-Diacetylchitobiose	3.93	level1			425.176	362.4	POS	C16H28N2O11	HMDB0062702	35061-50-8	C01674	Carbohydrates	Aminosugars and aminoglycosides	Aminosugars	CDOJPCSDOXYJJF-CBTAGEKQSA-N	0.00293612	0.00306378	0.0035766	0.00319216	0.002286	0.00247049	0.00224906	0.00233518	1.23499	0.0144596	0.0437417	0.731536	-0.451
270	Ectoine	3.93	level1			143.081	353.7	POS	C6H10N2O2	HMDB0240650	96702-03-3	C06231	Amino acids and Peptides	Small peptides	Aminoacids	WQXNXVUDBPYKBA-YFKPBYRVSA-N	0.343841	0.361179	0.356829	0.353949	0.0784855	0.0878657	0.083616	0.0833224	1.34103	1.32541e-06	0.000248228	0.235408	-2.08677
273	Traumatic acid	3.93	level1			227.128	312.1	NEG	C12H20O4	HMDB0000933	6402-36-4	C16308	Fatty acids	Fatty Acids and Conjugates	Dicarboxylic acids	MAZWDMBCPDUFDJ-VQHVLOKHSA-N	0.0337344	0.0352007	0.0362225	0.0350525	0.0925442	0.0983095	0.104666	0.0985066	1.33786	5.91525e-05	0.00132613	2.81026	1.4907
274	2-Methyl-3-hydroxybutyric acid	3.93	level1			117.055	214.9	NEG	C5H10O3	HMDB0000354	473-86-9		Fatty acids	Fatty Acids and Conjugates	Hydroxy fatty acids	VEXDRERIMPLZLU-UHFFFAOYSA-N	0.0190421	0.0202582	0.0182092	0.0191698	0.010019	0.0120678	0.0101359	0.0107409	1.30818	0.000698755	0.00554692	0.5603	-0.835728
275	Azasetron (hydrochloride)	3.93	level1			350.126	204	POS	C17H20ClN3O3	HMDB0248768	141922-90-9	D07481	Alkaloids	Tryptophan alkaloids		WUKZPHOXUVCQOR-UHFFFAOYSA-N	0.00326362	0.00291619	0.00340337	0.00319439	0.0122096	0.0100627	0.0130259	0.0117661	1.33004	0.000665542	0.00538073	3.68335	1.88102
276	4-Hydroxybenzoic acid	3.93	level1			137.024	193.9	NEG	C7H6O3	HMDB0000500	99-96-7	C00156	Shikimates and Phenylpropanoids	Phenolic acids (C6-C1)	Simple phenolic acids	FJKROLUGYXJWQN-UHFFFAOYSA-N	0.262795	0.281044	0.26795	0.270596	0.144218	0.147346	0.166219	0.152594	1.32409	0.00017568	0.00242132	0.563919	-0.826441
278	Adenine	3.93	level1			134.047	171.1	NEG	C5H5N5	HMDB0000034	73-24-5	C00147	Alkaloids	Pseudoalkaloids	Purine alkaloids	GFFGJBXGBJISGV-UHFFFAOYSA-N	6.22168	6.562	6.92377	6.56915	5.13507	5.60874	4.92594	5.22325	1.23594	0.00928533	0.0318346	0.795118	-0.330759
281	Sph(d18:0)	3.93	level1			302.305	129.2	POS	C18H39NO2	HMDB0000269	764-22-7	C00836	Fatty acids	Sphingolipids	Sphingoid bases	OTKJDMGTUTTYMP-ZWKOTPCHSA-N	0.0432658	0.0390902	0.0462886	0.0428816	0.0254006	0.0243816	0.0268841	0.0255554	1.31085	0.00142894	0.00886295	0.595954	-0.746726
282	Terminolic acid	3.93	level1			503.337	123.6	NEG	C30H48O6		564-13-6		Terpenoids	Triterpenoids	Oleanane triterpenoids	IDQVFXZQPGAVAM-GGVBUJAJSA-N	0.010111	0.0157641	0.0101967	0.0120239	0.136671	0.118436	0.161318	0.138808	1.32927	0.00832831	0.0294637	11.5443	3.52911
283	(S)-Abscisic acid	3.93	level1			263.128	101	NEG	C15H20O4		7773-56-0		Terpenoids	Apocarotenoids	Apocarotenoids(ε-)	JLIDBLDQVAYHNE-IBPUIESWSA-N	0.336937	0.336183	0.346635	0.339918	0.26299	0.244259	0.254197	0.253815	1.32508	0.000173542	0.00240331	0.746695	-0.421408
284	Thymine	3.93	level1			125.035	71.2	NEG	C5H6N2O2	HMDB0000262	65-71-4	C00178	Alkaloids	Pseudoalkaloids	pteridine alkaloids	RWQNBRDOKXIBIV-UHFFFAOYSA-N	0.107267	0.133126	0.121421	0.120605	0.0349917	0.0413619	0.0351764	0.0371767	1.32996	0.000425103	0.00404477	0.308253	-1.69782
285	Tetraethylene glycol	3.93	level1			195.122	59.1	POS	C8H18O5	HMDB0094708	112-60-7					UWHCKJMYHZGTIT-UHFFFAOYSA-N	0.516548	0.525352	0.435764	0.492554	0.752639	0.912754	0.625615	0.76367	1.16213	0.036686	0.0870667	1.55043	0.632665
287	4-Methylquinolin-2-ol	3.93	level1			160.075	45.3	POS	C10H9NO		607-66-9		Alkaloids	Tryptophan alkaloids	Quinoline alkaloids	APLVPBUBDFWWAD-UHFFFAOYSA-N	0.00756546	0.00172655	0.00641025	0.00523409	0.49539	0.329328	0.453032	0.425917	1.31411	0.0136472	0.0419774	81.3736	6.34649
290	Paullinic acid	3.92	level1			309.279	589.8	NEG	C20H38O2				Fatty acids	Fatty Acids and Conjugates	Unsaturated fatty acids	URXZXNYJPAJJOQ-FPLPWBNLSA-N	0.10517	0.137962	0.12365	0.122261	0.100055	0.0893377	0.0778037	0.0890654	1.11208	0.0442849	0.100497	0.728486	-0.457027
291	12-Methyltridecanoic acid	3.92	level1			227.201	543.4	NEG	C14H28O2	HMDB0031072	2724-57-4		Fatty acids	Fatty Acids and Conjugates	Branched fatty acids	YYVJAABUJYRQJO-UHFFFAOYSA-N	4.13053	4.5269	4.37237	4.34327	2.61358	2.54809	2.32917	2.49695	1.3262	0.000212541	0.00269938	0.5749	-0.798616
292	2-Aminoisobutyric acid	3.92	level1			102.056	47.2	NEG	C4H9NO2	HMDB0001906	62-57-7	C03665	Amino acids and Peptides	Small peptides	Aminoacids	FUOOLUPWFVMBKG-UHFFFAOYSA-N	0.611462	0.636334	0.650686	0.632827	0.569433	0.519843	0.493152	0.527476	1.20128	0.0137535	0.0422144	0.833523	-0.262707
293	(1S,4aR,6aS,6bR,10R,11R,12aR,14bS)-1,10,11-trihydroxy-2,2,6a,6b,9,9,12a-heptamethyl-1,3,4,5,6,6a,7,8,8a,10,11,12,13,14b-tetradecahydropicene-4a-carboxylic acid	3.92	level1			487.342	448.3	NEG	C30H48O5		31298-06-3		Terpenoids	Triterpenoids	Oleanane triterpenoids	XJMYUPJDAFKICJ-SEAQMCRASA-N	0.0294846	0.0491338	0.0245851	0.0344012	1.37455	2.03067	1.36112	1.58878	1.33132	0.01952	0.0544269	46.1839	5.52932
294	Pinoresinol 4-O-β-D-glucopyranoside	3.92	level1			519.187	282.7	NEG	C26H32O11		69251-96-3		Shikimates and Phenylpropanoids	Lignans	Furofuranoid lignans	QLJNETOQFQXTLI-WMYFGKAISA-N	0.117139	0.13329	0.128268	0.126232	0.448023	0.45613	0.439125	0.447759	1.33943	1.23066e-06	0.000240197	3.54711	1.82664
296	3-(carboxymethyl)benzoic acid	3.92	level1			179.035	263.4	NEG	C9H8O4		2084-13-1		Shikimates and Phenylpropanoids	Phenolic acids (C6-C1)	Simple phenolic acids	QNUWEXSGZVBMDV-UHFFFAOYSA-N	0.174486	0.155348	0.225252	0.185029	0.0439934	0.0449314	0.0505876	0.0465042	1.32314	0.0210678	0.0575427	0.251335	-1.99232
297	4-(dimethylamino)butanoate	3.92	level1			130.087	52.8	NEG	C6H13NO2		693-11-8		Amino acids and Peptides	Small peptides	Aminoacids	OXOWTLDONRGYOT-UHFFFAOYSA-N	3.42893	3.63915	3.5397	3.53593	2.54852	2.46504	2.29085	2.4348	1.31861	0.000346106	0.0035629	0.68859	-0.538284
298	Trehalose	3.92	level1			341.108	45.3	NEG	C12H22O11	HMDB0000975	99-20-7	C01083	Carbohydrates	Saccharides	Disaccharides	HDTRYLNUVZCQOY-LIZSDCNHSA-N	6.77195	7.235	7.1547	7.05388	10.69	10.8313	9.59982	10.3737	1.30897	0.00131807	0.0083951	1.47064	0.556445
299	(3S,4R,5R)-1,3,4,5-tetrahydroxy-6-[(2S,3R,4S,5S,6R)-3,4,5-trihydroxy-6-(hydroxymethyl)tetrahydropyran-2-yl]oxy-hexan-2-one	3.92	level1			341.108	45.3	NEG	C12H22O11		13718-94-0		Carbohydrates	Saccharides	Disaccharides	RJPPRBMGVWEZRR-WTZPKTTFSA-N	6.77195	7.235	7.1547	7.05388	10.69	10.8313	9.59982	10.3737	1.30897	0.00131807	0.0083951	1.47064	0.556445
301	AKBA	3.92	level1			513.357	533.3	POS	C32H48O5		67416-61-9		Terpenoids	Triterpenoids	Serratane triterpenoids	HMMGKOVEOFBCAU-BCDBGHSCSA-N	0.00107226	0.000783422	0.00104065	0.000965445	0.00019956	2.74836e-06	2.62293e-06	6.83106e-05	1.12454	0.00134342	0.0085027	0.0707555	-3.82101
304	(4aS,6aS,6bR,9R,10S,12aR,14bS)-10-hydroxy-9-(hydroxymethyl)-2,2,6a,6b,9,12a-hexamethyl-1,3,4,5,6,6a,7,8,8a,10,11,12,13,14b-tetradecahydropicene-4a-carboxylic acid	3.92	level1			471.347	495.8	NEG	C30H48O4		465-99-6		Terpenoids	Triterpenoids	Oleanane triterpenoids	PGOYMURMZNDHNS-XZTHESQKSA-N	0.0239093	0.0242926	0.0236856	0.0239625	0.281988	0.235568	0.300507	0.272688	1.3401	0.00597269	0.0232941	11.3798	3.5084
305	Cholest-4-en-3-one	3.92	level1			385.345	622.8	POS	C27H44O	HMDB0000921	601-57-0	C00599	Terpenoids	Steroids	Cholestane steroids	NYOXRYYXRWJDKP-GYKMGIIDSA-N	0.208238	0.213255	0.200268	0.207254	0.247651	0.255608	0.236386	0.246548	1.27222	0.0043059	0.0185534	1.1896	0.250473
307	Beauvericin	3.92	level1			784.414	491.4	POS	C45H57N3O9	HMDB0248918	26048-05-5	C11590	Amino acids and Peptides	Oligopeptides	Cyclic peptides	GYSCAQFHASJXRS-UHFFFAOYSA-N	0.000246028	0.000401854	0.000464803	0.000370895	2.72839e-06	2.74836e-06	2.62293e-06	2.69989e-06	1.33868	0.0298013	0.0744697	0.0072794	-7.10196
309	Difenoconazole	3.92	level1			406.071	452.8	POS	C19H17Cl2N3O3	HMDB0251255	119446-68-3	C18459				BQYJATMQXGBDHF-UHFFFAOYSA-N	0.0609771	0.111187	0.0651586	0.0791075	0.241854	0.474332	0.305345	0.34051	1.25485	0.0213806	0.0581671	4.3044	2.10581
315	Royal jelly acid	3.92	level1			185.118	346.3	NEG	C10H18O3	HMDB0244269	14113-05-4		Fatty acids	Fatty Acids and Conjugates	Hydroxy fatty acids	QHBZHVUGQROELI-SOFGYWHQSA-N	0.180775	0.227909	0.209705	0.20613	0.123148	0.121085	0.120945	0.121726	1.30035	0.0251695	0.0657397	0.59053	-0.759918
317	methyl (4S,5Z,6S)-6-[(2S,3R,4S,5R,6R)-3,5-dihydroxy-6-(hydroxymethyl)-4-[(2S,3R,4S,5S,6R)-3,4,5-trihydroxy-6-(hydroxymethyl)tetrahydropyran-2-yl]oxy-tetrahydropyran-2-yl]oxy-5-ethylidene-4-[2-[2-(4-hydroxyphenyl)ethoxy]-2-oxo-ethyl]-4H-pyran-3-carboxylate	3.92	level1			687.251	310.5	POS	C31H42O17				Terpenoids	Monoterpenoids	Secoiridoid monoterpenoids	IIEMULISLVWFNJ-DBTAZBLKSA-N	0.18481	0.131699	0.125115	0.147208	0.310944	0.283042	0.306711	0.300232	1.2706	0.00181692	0.0103837	2.03952	1.02823
318	3-[(2S,3R,4R,5S,6S)-3,5-dihydroxy-6-methyl-4-[(2S,3R,4S,5S,6R)-3,4,5-trihydroxy-6-(hydroxymethyl)tetrahydropyran-2-yl]oxy-tetrahydropyran-2-yl]oxy-5,7-dihydroxy-2-(4-hydroxyphenyl)chromen-4-one	3.92	level1			593.151	305	NEG	C27H30O15		1473419-87-2		Shikimates and Phenylpropanoids	Flavonoids	Flavonols	JAQAIBSNJJWIKR-GTGBIAQCSA-N	0.0499685	0.0637512	0.0628619	0.0588605	0.0121724	0.0124976	0.0172077	0.0139592	1.31981	0.000693574	0.00552188	0.237157	-2.07608
319	2-(2-Butoxyethoxy)acetic acid	3.92	level1			175.097	270.3	NEG	C8H16O4		82941-26-2		Fatty acids	Fatty Acids and Conjugates		MCORDGVZLPBVJB-UHFFFAOYSA-N	0.0615137	0.0729014	0.0672287	0.0672146	0.0999566	0.111221	0.0990942	0.103424	1.28956	0.00208726	0.0113783	1.53871	0.621724
329	Hygric acid	3.92	level1			130.086	47	POS	C6H11NO2	HMDB0094696	475-11-6	C22223	Alkaloids	Ornithine alkaloids	Pyrrolidine alkaloids	CWLQUGTUXBXTLF-YFKPBYRVSA-N	0.883888	0.881599	0.856737	0.874075	0.248474	0.252564	0.231714	0.244251	1.34107	5.14456e-07	0.000171693	0.279439	-1.83939
330	Nortropine	3.92	level1			128.107	45.8	POS	C7H13NO		538-09-0		Alkaloids	Ornithine alkaloids	Tropane alkaloids	YYMCYJLIYNNOMK-MEKDEQNOSA-N	0.0737152	0.0638868	0.0661515	0.0679178	0.145865	0.150065	0.150261	0.14873	1.33455	1.64874e-05	0.000698444	2.18985	1.13083
331	Glyceric acid	3.92	level1			105.019	43.3	NEG	C3H6O4	HMDB0000139	6000-40-4	C00258	Fatty acids	Fatty Acids and Conjugates	Hydroxy fatty acids	RBNPOMFGQQGHHO-UHFFFAOYSA-N	0.215815	0.23654	0.255006	0.235787	0.146079	0.146929	0.129551	0.140853	1.30439	0.00168902	0.00989679	0.597374	-0.743294
333	Protoporphyrin IX	3.92	level1			563.264	536.6	POS	C34H34N4O4		553-12-8		Alkaloids			ZCFFYALKHPIRKJ-UHFFFAOYSA-N	0.00794588	0.007253	0.00764701	0.00761529	0.0123494	0.0128928	0.0148191	0.0133538	1.31178	0.00178033	0.0102448	1.75355	0.810276
334	Val-Ile	3.92	level1			229.155	218.8	NEG	C11H22N2O3	HMDB0029130	20556-14-3		Amino acids and Peptides	Small peptides	Dipeptides	PNVLWFYAPWAQMU-DJLDLDEBSA-N	0.628466	0.631259	0.634275	0.631334	1.06806	1.0833	1.05527	1.06888	1.3417	7.65527e-07	0.000202065	1.69305	0.759621
336	N-Acetylglucosamine 1-phosphate	3.92	level1			300.048	460.7	NEG	C8H16NO9P	HMDB0001367	6866-69-9	C04256	Carbohydrates	Aminosugars and aminoglycosides	Aminosugars	FZLJPEPAYPUMMR-RTRLPJTCSA-N	0.0678216	0.0629629	0.0660297	0.0656047	0.136652	0.116126	0.119716	0.124165	1.32392	0.000833709	0.00622045	1.89262	0.920384
337	Glycerophosphocholine	3.92	level1			258.109	404	POS	C8H20NO6P	HMDB0000086	28319-77-9	C00670	Fatty acids	Glycerophospholipids	Glycerophosphocholines	SUHOQUVVVLNYQR-MRVPVSSYSA-N	6.80645	6.28241	6.58605	6.5583	4.58237	4.33551	4.58171	4.49986	1.32522	0.000283937	0.00316609	0.686132	-0.543442
340	N-Acetylcadaverine	3.92	level1			145.133	324	POS	C7H16N2O	HMDB0002284	32343-73-0		Alkaloids	Ornithine alkaloids	Polyamines	RMOIHHAKNOFHOE-UHFFFAOYSA-N	0.0263938	0.0266082	0.0249141	0.025972	0.0363766	0.0329179	0.0394217	0.0362388	1.27198	0.00626517	0.024099	1.3953	0.480574
343	Methylguanidine	3.92	level1			74.0711	281.5	POS	C2H7N3	HMDB0001522	471-29-4	C02294	Alkaloids			CHJJGSNFBQVOTG-UHFFFAOYSA-N	0.016531	0.0152457	0.0163875	0.0160547	0.0285111	0.029326	0.0287638	0.028867	1.337	1.10081e-05	0.00058879	1.79804	0.846422
344	Homovanillic acid sulfate	3.92	level1			261.007	264.3	NEG	C9H10O7S	HMDB0011719	38339-06-9		Shikimates and Phenylpropanoids	Phenolic acids (C6-C1)	Simple phenolic acids	IACOAKYXFIWAQN-UHFFFAOYSA-N	0.0344648	0.0335644	0.0357119	0.0345804	0.100709	0.0977899	0.102396	0.100298	1.34126	1.54899e-06	0.000262258	2.90044	1.53627
345	Riboflavin	3.92	level1			377.145	236	POS	C17H20N4O6	HMDB0000244	83-88-5	C00255	Alkaloids	Pseudoalkaloids	pteridine alkaloids	AUNGANRZJHBGPY-SCRDCRAPSA-N	0.0109235	0.0112593	0.0113326	0.0111718	0.0162434	0.0141927	0.0166766	0.0157042	1.28508	0.00429077	0.0185132	1.4057	0.491292
348	2-[(4-hydroxy-3-methoxy-phenyl)-[5-(4-hydroxy-3-methoxy-phenyl)-4-(hydroxymethyl)tetrahydrofuran-3-yl]methoxy]-6-(hydroxymethyl)tetrahydropyran-3,4,5-triol	3.92	level1			537.197	204	NEG	C26H34O12				Shikimates and Phenylpropanoids	Lignans	Furanoid lignans	WMABCPOXSNGIJO-UHFFFAOYSA-N	0.0122128	0.0131744	0.0129558	0.012781	0.0208409	0.0243367	0.0224251	0.0225342	1.3207	0.000751914	0.0058156	1.7631	0.818115
349	Kynurenic acid	3.92	level1			188.035	203.9	NEG	C10H7NO3	HMDB0000715	492-27-3	C01717	Alkaloids	Anthranilic acid alkaloids	Acridone alkaloids	HCZHHEIFKROPDY-UHFFFAOYSA-N	0.114065	0.128718	0.124919	0.122567	0.00524218	0.00447116	0.00613228	0.00528188	1.33987	0.00124839	0.00808758	0.0430936	-4.53638
350	7-Methylguanine	3.92	level1			166.072	202.8	POS	C6H7N5O	HMDB0000897	578-76-7	C02242	Alkaloids	Pseudoalkaloids	pteridine alkaloids	FZWGECJQACGGTI-UHFFFAOYSA-N	0.0358207	0.0352651	0.0376528	0.0362462	0.0263552	0.0250188	0.0272818	0.0262186	1.31691	0.000505268	0.00453363	0.723347	-0.467239
352	Hypoxanthine	3.92	level1			135.031	181.8	NEG	C5H4N4O	HMDB0000157	68-94-0	C00262	Alkaloids	Pseudoalkaloids	Purine alkaloids	FDGQSTZJBFJUBT-UHFFFAOYSA-N	0.330032	0.380908	0.375098	0.362013	0.241965	0.26322	0.239158	0.248114	1.29107	0.00305177	0.0146463	0.685374	-0.545036
353	Creatinine	3.92	level1			114.066	181.6	POS	C4H7N3O	HMDB0000562	60-27-5	C00791	Alkaloids	Histidine alkaloids	Imidazole alkaloids	DDRJAANPRJIHGJ-UHFFFAOYSA-N	0.00474581	0.00425578	0.00360658	0.00420272	0.0174375	0.0140309	0.0160495	0.0158393	1.32774	0.000366792	0.00369301	3.76882	1.91411
354	9,13-dimethyl-7-(5-methylpiperidin-2-yl)-5-oxapentacyclo[10.8.0.02,9.04,8.013,18]icosa-6,17-dien-16-one	3.92	level1			410.305	176.4	POS	C27H39NO2				Alkaloids	Pseudoalkaloids	Steroidal alkaloids	HFZWKBGUQZPBNB-UHFFFAOYSA-N	0.0247078	0.0594659	0.0454951	0.0432229	0.0881637	0.103148	0.100072	0.0971278	1.14433	0.00825839	0.0292874	2.24714	1.16809
355	1-Methylguanine	3.92	level1			166.072	171.5	POS	C6H7N5O	HMDB0003282	938-85-2	C04152	Alkaloids	Pseudoalkaloids	Purine alkaloids	RFLVMTUMFYRZCB-UHFFFAOYSA-N	0.125196	0.119193	0.124552	0.12298	0.147621	0.135892	0.144899	0.142804	1.24965	0.00788303	0.0283421	1.1612	0.215611
356	PE(34:2)	3.92	level1			716.52	170.2	POS	C39H74NO8P							NDGYJYRRMBQYAU-BQZPLEDQSA-N	1.20972	1.17686	1.22471	1.20376	1.32377	1.40985	1.3762	1.36994	1.2712	0.00445302	0.0189864	1.13805	0.186559
357	PE(18:0/18:2)	3.92	level1			742.538	167.8	NEG	C41H78NO8P	HMDB0008994	7266-53-7		Fatty acids	Glycerophospholipids	Glycerophosphoethanolamines	YDTWOEYVDRKKCR-KNERPIHHSA-N	0.13438	0.144796	0.153522	0.144233	0.0993001	0.105173	0.118114	0.107529	1.23313	0.00944535	0.0322103	0.745524	-0.423673
358	Taurodeoxycholic acid	3.92	level1			498.291	159.3	NEG	C26H45NO6S	HMDB0000896	516-50-7	C05463	Terpenoids	Steroids	Cholane steroids	AWDRATDZQPNJFN-VAYUFCLWSA-N	0.041431	0.0481203	0.046551	0.0453674	0.260897	0.268017	0.247356	0.258757	1.3398	4.78788e-06	0.000403105	5.70359	2.51187
360	(2R,3S,4S,5R,6S)-2-(hydroxymethyl)-6-(2-hydroxyphenoxy)tetrahydropyran-3,4,5-triol	3.92	level1			271.082	146.5	NEG	C12H16O7		2400-71-7		Shikimates and Phenylpropanoids	Phenolic acids (C6-C1)	Simple phenolic acids	NMZWIAATAZXMRV-RMPHRYRLSA-N	0.55526	0.482621	0.569286	0.535722	0.172003	0.168529	0.163185	0.167906	1.33646	0.00496886	0.0204892	0.31342	-1.67383
361	2-Ketobutyric acid	3.92	level1			101.024	98.6	NEG	C4H6O3	HMDB0000005	600-18-0	C00109	Fatty acids	Fatty Acids and Conjugates	Oxo fatty acids	TYEYBOSBBBHJIV-UHFFFAOYSA-N	11.5934	14.2405	14.2364	13.3567	4.71565	4.86185	4.92298	4.83349	1.33068	0.0102526	0.0341453	0.361877	-1.46643
362	Uracil	3.92	level1			111.02	82.4	NEG	C4H4N2O2	HMDB0000300	66-22-8	C00106	Alkaloids	Pseudoalkaloids	Purine alkaloids	ISAKRJDGNUQOIC-UHFFFAOYSA-N	2.0114	2.3938	2.24066	2.21529	1.15075	1.22207	1.0533	1.14204	1.31696	0.000903876	0.00655545	0.515526	-0.955884
365	13(S)-HpOTrE	3.92	level1			291.196	52.1	NEG	C18H30O4	HMDB0301803	67597-26-6	C04785	Fatty acids	Fatty Acids and Conjugates	Other Octadecanoids	UYQGVDXDXBAABN-FQSPHKRJSA-N	1.21312	1.63101	1.24692	1.36369	0.434008	0.420175	0.355908	0.403364	1.32027	0.00213124	0.0115345	0.295789	-1.75736
366	N-p-trans-Coumaroyltyramine	3.92	level1			284.127	48.8	POS	C17H17NO3	HMDB0039521	36417-86-4		Shikimates and Phenylpropanoids	Phenylpropanoids (C6-C3)	Cinnamic acid amides	RXGUTQNKCXHALN-BJMVGYQFSA-N	10.4956	9.45061	9.47877	9.80833	3.85507	2.36868	4.03222	3.41866	1.27678	0.000530726	0.00467198	0.348546	-1.52058
367	Diethyltoluamide	3.92	level1			192.138	34.3	POS	C12H17NO	HMDB0250930	134-62-3	C10935	Alkaloids			MMOXZBCLCQITDF-UHFFFAOYSA-N	0.0134051	0.0138697	0.0133466	0.0135405	0.0198949	0.0203926	0.0179148	0.0194008	1.3075	0.0016365	0.00969399	1.4328	0.518836
368	Ganoderitriol M	3.92	level1			473.363	31.8	NEG	C30H50O4		1265906-35-1		Terpenoids	Triterpenoids	Lanostane, Tirucallane and Euphane triterpenoids	XRNFKNZQPAWPQL-YFFZAEHLSA-N	4.57461	5.92524	5.439	5.31295	2.07019	2.20011	2.03905	2.10311	1.32383	0.0137316	0.0421739	0.395847	-1.33699
369	5Z,8Z,11Z-Eicosatrienoic acid	3.91	level1			305.248	557.5	NEG	C20H34O2	HMDB0010378	20590-32-3	C21938	Fatty acids	Fatty Acids and Conjugates	Unsaturated fatty acids	UNSRRHDPHVZAHH-YOILPLPUSA-N	0.344436	0.401847	0.377015	0.374433	0.0978911	0.103583	0.106604	0.102693	1.33866	0.00311786	0.0148565	0.274262	-1.86637
370	Benzoic acid	3.91	level1			121.029	123.5	NEG	C7H6O2	HMDB0001870	65-85-0	C00180	Shikimates and Phenylpropanoids	Phenolic acids (C6-C1)	Simple phenolic acids	WPYMKLBDIGXBTP-UHFFFAOYSA-N	1.9503	2.19151	2.00994	2.05058	4.29464	4.5258	4.16221	4.32755	1.33327	5.985e-05	0.00133526	2.1104	1.07752
371	(1S,2R,4aS,6aS,6bR,9R,10S,11R,12aR,14bS)-10,11-dihydroxy-9-(hydroxymethyl)-1,2,6a,6b,9,12a-hexamethyl-2,3,4,5,6,6a,7,8,8a,10,11,12,13,14b-tetradecahydro-1H-picene-4a-carboxylic acid	3.91	level1			487.342	448.3	NEG	C30H48O5				Terpenoids	Triterpenoids	Ursane and Taraxastane triterpenoids	JXSVIVRDWWRQRT-SVCFHXMWSA-N	0.0294846	0.0491338	0.0245851	0.0344012	1.37455	2.03067	1.36112	1.58878	1.33132	0.01952	0.0544269	46.1839	5.52932
375	(2E,4Z)-9-oxooctadeca-2,4-dienoic acid	3.91	level1			293.212	485.5	NEG	C18H30O3				Fatty acids	Fatty Acids and Conjugates	Oxo fatty acids	MECYDNMVWUSMSU-YTLDOUCOSA-N	4.0446	4.54992	4.22668	4.27373	11.6412	9.42154	11.1156	10.7261	1.32589	0.000711279	0.00561451	2.50977	1.32755
377	2-Isopropylmalic acid	3.91	level1			175.061	215.9	NEG	C7H12O5	HMDB0000402	73142-75-3	C02504	Fatty acids	Fatty Acids and Conjugates	Dicarboxylic acids	BITYXLXUCSKTJS-UHFFFAOYSA-N	3.09275	3.6142	3.28547	3.33081	0.540942	0.546159	0.499371	0.528824	1.34038	0.00272393	0.0135868	0.158767	-2.65501
378	Isopimaric acid	3.91	level1			301.217	529.5	NEG	C20H30O2				Terpenoids	Diterpenoids	Pimarane and Isopimarane diterpenoids	MXYATHGRPJZBNA-KRFUXDQASA-N	2.31937	3.14623	2.83484	2.76681	0.110158	0.0992288	0.103047	0.104145	1.34042	0.00809115	0.0288668	0.0376407	-4.73156
379	3-Pyridylacetic acid	3.91	level1			138.055	45.6	POS	C7H7NO2	HMDB0001538	501-81-5		Alkaloids	Nicotinic acid alkaloids	Pyridine alkaloids	WGNUNYPERJMVRM-UHFFFAOYSA-N	0.417793	0.38675	0.396084	0.400209	0.0679615	0.0749204	0.0674452	0.070109	1.34091	4.10384e-06	0.000374674	0.175181	-2.51308
380	(2R,3S,4R,5R)-2,3,4,5-tetrahydroxy-6-[(2R,3R,4S,5S,6R)-3,4,5-trihydroxy-6-(hydroxymethyl)tetrahydropyran-2-yl]oxy-hexanal	3.91	level1			341.108	45.3	NEG	C12H22O11		554-91-6		Carbohydrates	Saccharides	Disaccharides	AYRXSINWFIIFAE-UDKQPYHCSA-N	6.77195	7.235	7.1547	7.05388	10.69	10.8313	9.59982	10.3737	1.30897	0.00131807	0.0083951	1.47064	0.556445
381	Sorbose	3.91	level1			203.052	43.1	POS	C6H12O6	HMDB0246950	87-79-6	C00247	Carbohydrates	Saccharides	Monosaccharides	BJHIKXHVCXFQLS-OTWZMJIISA-N	0.699653	0.770259	0.703672	0.724528	2.83787	2.94488	2.77539	2.85272	1.34042	2.57448e-06	0.000312898	3.93735	1.97722
382	1-[2-hydroxy-6-methyl-4-[(2S,3R,4S,5S,6R)-3,4,5-trihydroxy-6-(hydroxymethyl)tetrahydropyran-2-yl]oxy-phenyl]ethanone	3.91	level1			327.109	247.8	NEG	C15H20O8				Polyketides	Phloroglucinols	Acyl phloroglucinols	CFJLERBDXYGARW-TVKJYDDYSA-N	0.0588748	0.0597132	0.059816	0.059468	0.0785848	0.0803804	0.0794765	0.0794806	1.33992	4.75342e-06	0.000401847	1.33653	0.418489
383	Pipecolic acid	3.91	level1			130.086	47	POS	C6H11NO2	HMDB0000716	3105-95-1	C00408	Amino acids and Peptides	Small peptides	Aminoacids	HXEACLLIILLPRG-YFKPBYRVSA-N	0.883888	0.881599	0.856737	0.874075	0.248474	0.252564	0.231714	0.244251	1.34107	5.14456e-07	0.000171693	0.279439	-1.83939
386	LPE(15:0)	3.91	level1			440.276	493.5	POS	C20H42NO7P	HMDB0011502			Fatty acids	Glycerophospholipids	Glycerophosphoethanolamines	FGHPDPYCRTXYNZ-LJQANCHMSA-N	0.0253292	0.0249189	0.028896	0.0263814	0.0313204	0.0332262	0.0330825	0.032543	1.20996	0.011786	0.0377553	1.23356	0.302827
387	LPC(18:2/0:0)	3.91	level1			520.338	488.9	POS	C26H50NO7P	HMDB0010386	22252-07-9	C04100	Fatty acids	Glycerophospholipids	Glycerophosphocholines	SPJFYYJXNPEZDW-FTJOPAKQSA-N	2.25914	2.07919	2.08949	2.14261	1.92417	1.95373	1.84908	1.90899	1.17519	0.0241777	0.0637879	0.890968	-0.166555
388	(10E,12E)-9-hydroxyoctadeca-10,12-dienoic acid	3.91	level1			295.227	484.7	NEG	C18H32O3		15514-85-9|115185-06-3		Fatty acids	Octadecanoids	Other Octadecanoids	NPDSHTNEKLQQIJ-SIGMCMEVSA-N	7.16046	7.63754	7.30979	7.36926	20.5802	16.6338	19.6826	18.9655	1.32904	0.00967095	0.0327458	2.5736	1.36379
392	(1R,4aR,4bS,6aS,9R,10R,10aS)-1-(carboxymethyl)-2-(1-carboxy-1-methyl-ethyl)-10-hydroxy-1,4a,4b,9,10-pentamethyl-3,4,5,6,7,8,9,10a,12,12a-decahydro-2H-chrysene-6a-carboxylic acid	3.91	level1			517.317	427.9	NEG	C30H46O7		114175-98-3		Terpenoids	Triterpenoids	Ursane and Taraxastane triterpenoids	BGDQNRGNCKACFK-QSCFBMDYSA-N	0.00410436	0.00701929	0.00458359	0.00523574	0.0233963	0.0311394	0.0261649	0.0269002	1.30961	0.000886717	0.00647165	5.1378	2.36115
395	3-[8-(1-hydroxy-1-methyl-ethyl)-11-methoxy-4,5a,9-trimethyl-1-oxo-3,6,7,8,9a,10-hexahydroisobenzofuro[5,6-b]chromen-9-yl]propanoic acid	3.91	level1			445.223	413.8	NEG	C25H34O7				Terpenoids	Meroterpenoids	Tetraketide meroterpenoids	RRCGIBQMOUEGNU-UHFFFAOYSA-N	0.0252749	0.036715	0.0270384	0.0296761	0.304159	0.299845	0.255592	0.286532	1.33371	8.63667e-05	0.00162344	9.65531	3.27132
396	(Z)-9,10,11-trihydroxyoctadec-12-enoic acid	3.91	level1			329.233	407.3	NEG	C18H34O5				Fatty acids	Octadecanoids	Other Octadecanoids	JHGVFGJXFVIYSM-XFXZXTDPSA-N	6.54038	7.64659	7.041	7.07599	14.8412	15.7915	13.9421	14.8583	1.32578	0.000235338	0.00283017	2.09982	1.07026
397	[(2S,3R,4S,5S,6R)-3,4,5-trihydroxy-6-(hydroxymethyl)tetrahydropyran-2-yl] (2E,4E)-5-[(1R,7S,8S,9R)-7-acetoxy-4,9-dimethyl-11-oxo-10-oxatricyclo[6.3.2.01,7]tridec-3-en-9-yl]-2-methyl-penta-2,4-dienoate	3.91	level1			549.234	375.3	NEG	C28H38O11		98891-44-2		Terpenoids	Diterpenoids		IVYWRYGMQNKDQB-VHJBJYHKSA-N	0.0116649	0.0211765	0.0133649	0.0154021	0.0875176	0.0918197	0.0815373	0.0869582	1.31338	6.82525e-05	0.00143382	5.64587	2.4972
399	Butyllactate	3.91	level1			145.087	314.6	NEG	C7H14O3	HMDB0040254	138-22-7		Fatty acids	Fatty esters	Wax monoesters	MRABAEUHTLLEML-UHFFFAOYSA-N	0.193728	0.209721	0.21219	0.205213	0.24612	0.257901	0.23746	0.24716	1.24432	0.00715289	0.0264482	1.20441	0.268324
405	gamma-Glutamylmethionine	3.91	level1			277.086	97.8	NEG	C10H18N2O5S	HMDB0034367	17663-87-5		Amino acids and Peptides	Small peptides	Dipeptides	RQNSKRXMANOPQY-BQBZGAKWSA-N	0.167459	0.202522	0.203348	0.19111	0.0365113	0.0452979	0.040615	0.0408081	1.33424	0.000241255	0.00287495	0.213532	-2.22748
406	Pilocarpine	3.91	level1			209.128	84.2	POS	C11H16N2O2		54-71-7	C07474|D00525	Alkaloids	Histidine alkaloids	Imidazole alkaloids	QCHFTSOMWOSFHM-WPRPVWTQSA-N	0.0432779	0.0374457	0.0386917	0.0398051	0.0184668	0.01726	0.0165055	0.0174108	1.33008	0.000274558	0.00310225	0.4374	-1.19297
407	3-Methoxytyramine	3.91	level1			168.101	60.4	POS	C9H13NO2	HMDB0000022	554-52-9	C05587	Alkaloids	Tyrosine alkaloids	Phenylethylamines	DIVQKHQLANKJQO-UHFFFAOYSA-N	0.215269	0.192916	0.215365	0.20785	0.122241	0.121697	0.130257	0.124731	1.32357	0.000476028	0.00435955	0.600103	-0.736718
408	1-Aminocyclopropane-1-carboxylic acid	3.91	level1			100.04	52.7	NEG	C4H7NO2	HMDB0036458	22059-21-8	C01234	Amino acids and Peptides	Small peptides	Aminoacids	PAJPWUMXBYXFCZ-UHFFFAOYSA-N	0.18337	0.189709	0.182067	0.185049	0.164307	0.174597	0.164575	0.167826	1.21011	0.0140057	0.0427655	0.906932	-0.140934
409	4-Hydroxyproline	3.91	level1			130.051	50.8	NEG	C5H9NO3	HMDB0000725	51-35-4	C01157	Amino acids and Peptides	Small peptides	Aminoacids	PMMYEEVYMWASQN-DMTCNVIQSA-N	0.199717	0.220199	0.203015	0.207644	0.377679	0.402007	0.377031	0.385572	1.33249	6.81075e-05	0.00143256	1.85689	0.89289
410	Threonic acid	3.91	level1			135.03	42.2	NEG	C4H8O5	HMDB0062620	7306-96-9	C01620	Fatty acids	Fatty Acids and Conjugates	Hydroxy fatty acids	JPIJQSOTBSSVTP-STHAYSLISA-N	0.23296	0.249746	0.248596	0.243767	0.206653	0.167913	0.161021	0.178529	1.19696	0.0127231	0.0399034	0.732375	-0.449345
413	Glucose 1-phosphate	3.91	level1			259.022	474.5	NEG	C6H13O9P	HMDB0001586	59-56-3	C00103	Carbohydrates	Saccharides	Monosaccharides	HXXFSFRBOHSIMQ-GASJEMHNSA-N	0.0279318	0.0204643	0.0223016	0.0235659	0.0639332	0.0529717	0.0655089	0.0608046	1.30659	0.00120158	0.00788357	2.5802	1.36748
414	gamma-Glutamylglutamine	3.91	level1			276.118	450.3	POS	C10H17N3O6	HMDB0011738	10148-81-9	C05283	Amino acids and Peptides	Small peptides	Dipeptides	JBFYFLXEJFQWMU-WDSKDSINSA-N	0.0982811	0.080895	0.0916585	0.0902782	0.176139	0.158191	0.184856	0.173062	1.3108	0.000895873	0.006515	1.91698	0.938838
416	Glutamine	3.91	level1			129.065	385.8	POS	C5H10N2O3	HMDB0000641	56-85-9	C00064	Amino acids and Peptides	Small peptides	Aminoacids	ZDXPYRJPNDTMRX-VKHMYHEASA-N	0.0765407	0.0699777	0.0468537	0.0644574	0.0283193	0.0282915	0.0193773	0.0253294	1.23468	0.0145374	0.0439048	0.392963	-1.34753
418	Methylsuccinic acid	3.91	level1			131.035	373.2	NEG	C5H8O4	HMDB0001844	498-21-5		Fatty acids	Fatty Acids and Conjugates	Dicarboxylic acids	WXUAQHNMJWJLTG-UHFFFAOYSA-N	0.0961783	0.100311	0.0975849	0.0980246	0.0692307	0.0685159	0.0605464	0.0660977	1.30947	0.000462451	0.00427679	0.674297	-0.568545
420	Tryptophan	3.91	level1			205.096	284.8	POS	C11H12N2O2	HMDB0030396	73-22-3	C00078	Amino acids and Peptides	Small peptides	Aminoacids	QIVBCDIJIAJPQS-VIFPVBQESA-N	0.0437173	0.0279813	0.0302949	0.0339978	0.0538588	0.0756047	0.0517962	0.0604199	1.13733	0.0433852	0.0989215	1.77717	0.829581
421	Phe-Pro	3.91	level1			261.124	258.4	NEG	C14H18N2O3	HMDB0011177	7669-65-0		Amino acids and Peptides	Small peptides		WEQJQNWXCSUVMA-RYUDHWBXSA-N	0.0121296	0.0102991	0.0104366	0.0109551	0.015617	0.0146775	0.0137968	0.0146971	1.23549	0.00902238	0.0311982	1.34157	0.423925
422	Val-Met	3.91	level1			247.112	221.5	NEG	C10H20N2O3S	HMDB0029133	14486-09-0		Amino acids and Peptides	Small peptides	Dipeptides	YSGSDAIMSCVPHG-JGVFFNPUSA-N	0.0662461	0.0580074	0.061449	0.0619008	0.0718006	0.0747716	0.0738366	0.0734696	1.21825	0.010451	0.0346236	1.18689	0.247187
423	Phenylalanylphenylalanine	3.91	level1			313.154	176.9	POS	C18H20N2O3	HMDB0013302	2577-40-4		Amino acids and Peptides	Small peptides	Dipeptides	GKZIWHRNKRBEOH-HOTGVXAUSA-N	0.016075	0.0163979	0.0161532	0.0162087	0.0325827	0.0294083	0.0287783	0.0302565	1.33239	0.00665624	0.0251483	1.86668	0.900475
425	PC(18:1(9Z)/18:1(9Z))	3.91	level1			786.597	165	POS	C44H84NO8P	HMDB0000593	4235-95-4		Fatty acids	Glycerophospholipids	Glycerophosphocholines	SNKAWJBJQDLSFF-AOMFJDGTSA-N	0.826279	0.837128	0.865281	0.842896	0.683516	0.746278	0.691256	0.707016	1.26866	0.00405859	0.017808	0.838795	-0.25361
428	Sph(t18:0)	3.91	level1			318.299	159.7	POS	C18H39NO3	HMDB0004610	554-62-1	C12144	Fatty acids	Sphingolipids	Sphingoid bases	AERBNCYCJBRYDG-KSZLIROESA-N	0.76153	0.722105	0.769979	0.751205	0.541797	0.526548	0.596172	0.554839	1.29255	0.0015926	0.0095216	0.738599	-0.437137
435	2-Ethylbutyric acid	3.9	level1			115.076	73.3	NEG	C6H12O2	HMDB0031221	88-09-5		Fatty acids	Fatty Acids and Conjugates	Branched fatty acids	OXQGTIUCKGYOAA-UHFFFAOYSA-N	0.893579	1.04674	0.973665	0.971327	0.504173	0.523925	0.474739	0.500946	1.32564	0.000536605	0.004703	0.515733	-0.955303
436	8-hydroxy-4-(1-hydroxy-1-methyl-ethyl)-10-oxatricyclo[7.2.1.01,5]dodec-3-ene-8-carboxylic acid	3.9	level1			281.139	284.8	NEG	C15H22O5				Terpenoids	Diterpenoids		LKOCXGZSSYQSLN-UHFFFAOYSA-N	0.31116	0.378829	0.348074	0.346021	0.0365447	0.0369425	0.0344731	0.0359868	1.34074	0.0039122	0.0173624	0.104002	-3.26532
438	Isobutyrylcarnitine (Car(4:0))	3.9	level1			214.143	97.8	POS	C11H21NO4	HMDB0000736	25518-49-4		Fatty acids	Fatty esters	Fatty acyl carnitines	LRCNOZRCYBNMEP-SECBINFHSA-O	0.0190074	0.0189153	0.018119	0.0186806	0.0137538	0.0132527	0.0135722	0.0135262	1.33301	8.45606e-05	0.00160451	0.724078	-0.465783
439	beta-Guanidinopropionic acid	3.9	level1			132.076	367.8	POS	C4H9N3O2	HMDB0013222	353-09-3	C03065	Amino acids and Peptides	Small peptides	Aminoacids	KMXXSJLYVJEBHI-UHFFFAOYSA-N	0.00707271	0.00467927	0.00495748	0.00556982	0.0177531	0.0199275	0.0188443	0.0188417	1.31312	0.00017374	0.00240406	3.38281	1.75822
441	PC(18:1(6Z)/18:1(6Z))	3.9	level1			786.597	165	POS	C44H84NO8P		56391-91-4		Fatty acids	Glycerophospholipids	Glycerophosphocholines	KLJBLQFSKZACGJ-MMKOEKFTSA-N	0.826279	0.837128	0.865281	0.842896	0.683516	0.746278	0.691256	0.707016	1.26866	0.00405859	0.017808	0.838795	-0.25361
442	Vanillin	3.9	level1			151.04	275.7	NEG	C8H8O3	HMDB0012308	121-33-5	C00755	Shikimates and Phenylpropanoids	Phenolic acids (C6-C1)	Cinnamic acids and derivatives	MWOOGOJBHIARFG-UHFFFAOYSA-N	0.371319	0.376835	0.377432	0.375196	0.269258	0.267289	0.311141	0.282563	1.26816	0.0213809	0.0581671	0.753108	-0.409071
443	PC(37:4)	3.9	level1			796.581	633.2	POS	C45H82NO8P							CBVSTGCTYPGQKV-SJHDXFTHSA-N	0.164967	0.156216	0.133251	0.151478	0.0698456	0.0794518	0.108042	0.0857799	1.20216	0.0115197	0.0371491	0.566286	-0.820396
450	LPE(18:3)	3.9	level1			476.275	474.2	POS	C23H42NO7P	HMDB0011508			Fatty acids	Glycerophospholipids	Glycerophosphoethanolamines	QULMFYLWLOKODU-CSLWLMPESA-N	0.170341	0.161097	0.179599	0.170346	0.201293	0.221099	0.200705	0.207699	1.22318	0.0120756	0.038413	1.21928	0.286029
451	4-[(2R,2'S,3'R,4'aS,6'R)-2',3',4-trihydroxy-1',1',4'a,6'-tetramethyl-6-oxo-spiro[3,8-dihydrofuro[2,3-e]isoindole-2,5'-decalin]-7-yl]butanoic acid	3.9	level1			486.248	394.3	NEG	C27H37NO7				Terpenoids	Meroterpenoids	Spriromeroterpenoids	WENVIACWNHYPLR-KUNUJKOTSA-N	0.0220335	0.0235388	0.0262621	0.0239448	0.00605557	0.00599387	0.00724131	0.00643025	1.33296	0.00017684	0.00242792	0.268545	-1.89676
454	N-Acetyltryptophan	3.9	level1			245.093	278.9	NEG	C13H14N2O3	HMDB0013713	1218-34-4	C03137	Amino acids and Peptides	Small peptides	Dipeptides	DZTHIGRZJZPRDV-LBPRGKRZSA-N	18.1531	21.5071	20.9653	20.2085	0.147203	0.156835	0.186724	0.163587	1.34167	0.00267574	0.0134353	0.00809497	-6.94876
455	Acanthoside B	3.9	level1			579.208	277.6	NEG	C28H36O13		7374-79-0	C10890	Shikimates and Phenylpropanoids	Lignans	Furofuranoid lignans	WEKCEGQSIIQPAQ-IRBNZIFYSA-N	0.58163	0.616356	0.590955	0.596314	2.865	2.80742	2.7676	2.81334	1.34191	2.04063e-07	0.000122341	4.71789	2.23814
457	(2Z,4E)-5-[8-hydroxy-1,5-dimethyl-3-[(2R,3R,4S,5S,6R)-3,4,5-trihydroxy-6-(hydroxymethyl)oxan-2-yl]oxy-6-oxabicyclo[3.2.1]octan-8-yl]-3-methylpenta-2,4-dienoic acid	3.9	level1			425.182	259.3	NEG	C21H32O10				Terpenoids	Apocarotenoids	Apocarotenoids(ε-)	UHHVHDDICOEBTQ-ANHSACEGSA-N	0.116564	0.126429	0.121277	0.121423	0.509349	0.522816	0.454673	0.495613	1.339	0.00266319	0.0133936	4.08169	2.02917
458	2-hydroxy-3,4-dimethoxy-benzoic acid	3.9	level1			197.045	256.5	NEG	C9H10O5		5653-46-3		Shikimates and Phenylpropanoids	Phenolic acids (C6-C1)	Simple phenolic acids	CJFQIVAOBBTJCI-UHFFFAOYSA-N	0.161548	0.178887	0.168276	0.16957	0.428536	0.449515	0.419846	0.432632	1.33812	1.31657e-05	0.000636214	2.55134	1.35126
459	2-Phenylacetamide	3.9	level1			136.075	251.1	POS	C8H9NO	HMDB0010715	103-81-1	C02505	Alkaloids	Peptide alkaloids	Simple amide alkaloids	LSBDFXRDZJMBSC-UHFFFAOYSA-N	0.0252945	0.0286484	0.026977	0.0269733	0.0403084	0.0499482	0.0380058	0.0427541	1.24584	0.0140254	0.04281	1.58505	0.66453
462	3-methoxy-4-[3,4,5-trihydroxy-6-(hydroxymethyl)tetrahydropyran-2-yl]oxy-benzoic acid	3.9	level1			329.088	207.3	NEG	C14H18O9				Shikimates and Phenylpropanoids	Phenolic acids (C6-C1)	Simple phenolic acids	JYFOSWJYZIVJPO-UHFFFAOYSA-N	0.869295	0.825541	0.83836	0.844399	0.735773	0.779257	0.704271	0.739767	1.20148	0.0144701	0.0437595	0.876088	-0.190853
463	2'-Deoxyuridine	3.9	level1			227.067	96.8	NEG	C9H12N2O5	HMDB0000012	951-78-0	C00526	Carbohydrates	Nucleosides	Pyrimidine nucleos(t)ides	MXHRCPNRJAMMIM-SHYZEUOFSA-N	0.0363375	0.0420801	0.0375118	0.0386431	0.0256599	0.0303979	0.0274067	0.0278215	1.24651	0.00834909	0.0295148	0.71996	-0.474011
466	Betaine	3.9	level1			118.086	46.7	POS	C5H11NO2	HMDB0000043	107-43-7	C00719	Amino acids and Peptides	Small peptides	Aminoacids	KWIUHFFTVRNATP-UHFFFAOYSA-N	4.44467	4.25147	4.38628	4.36081	3.68721	3.7582	3.54056	3.66199	1.30142	0.00124214	0.00806035	0.83975	-0.251968
467	Stachydrine	3.9	level1			144.101	45.9	POS	C7H13NO2	HMDB0004827	4136-37-2	C10172	Alkaloids	Ornithine alkaloids	Pyrrolidine alkaloids	CMUNUTVVOOHQPW-LURJTMIESA-N	0.284117	0.277169	0.278131	0.279806	0.239076	0.241567	0.223813	0.234819	1.29028	0.00165046	0.0097473	0.839221	-0.252877
468	N-Methyl-L-asparagine	3.9	level1			145.062	42.2	NEG	C5H10N2O3		7175-34-0		Amino acids and Peptides	Small peptides	Aminoacids	CFRMVEKWKKDNAH-VKHMYHEASA-N	1.69221	1.64413	1.76405	1.70013	0.776228	0.727485	0.726109	0.743274	1.33878	1.56339e-05	0.000682115	0.437187	-1.19368
471	(2S,3R,4S,5S,6R)-2-[4-[(3S,3aR,6S,6aR)-6-[3,5-dimethoxy-4-[(2S,3R,4S,5S,6R)-3,4,5-trihydroxy-6-(hydroxymethyl)tetrahydropyran-2-yl]oxy-phenyl]-1,3,3a,4,6,6a-hexahydrofuro[3,4-c]furan-3-yl]-2,6-dimethoxy-phenoxy]-6-(hydroxymethyl)tetrahydropyran-3,4,5-triol	3.9	level1			741.26	278.1	NEG	C34H46O18		573-44-4		Shikimates and Phenylpropanoids	Lignans	Furofuranoid lignans	FFDULTAFAQRACT-XKBSQSBASA-N	0.031456	0.0299308	0.0319894	0.0311254	0.0980132	0.0953217	0.0925268	0.0952873	1.34109	2.94135e-06	0.000328991	3.0614	1.61419
472	gamma-Glutamylglutamic acid	3.9	level1			275.088	476.4	NEG	C10H16N2O7	HMDB0011737	1116-22-9	C05282	Amino acids and Peptides	Small peptides	Dipeptides	OWQDWQKWSLFFFR-WDSKDSINSA-N	0.00466131	0.00639709	0.00753504	0.00619781	0.0118981	0.0169829	0.0116586	0.0135132	1.20958	0.0191594	0.0536971	2.18031	1.12454
473	Ala-Glu	3.9	level1			217.083	427.7	NEG	C8H14N2O5	HMDB0028686	13187-90-1	C20957	Amino acids and Peptides	Small peptides	Dipeptides	VYZAGTDAHUIRQA-WHFBIAKZSA-N	0.0125346	0.0137541	0.0142637	0.0135175	0.0184182	0.0177379	0.0180638	0.0180733	1.29357	0.00115399	0.00766695	1.33703	0.419033
474	Prolylalanine	3.9	level1			187.107	353.9	POS	C8H14N2O3	HMDB0029010	6422-36-2		Amino acids and Peptides	Small peptides	Dipeptides	FELJDCNGZFDUNR-UHFFFAOYSA-N	0.0186612	0.0184495	0.0172251	0.0181119	0.0220787	0.0206365	0.0205424	0.0210859	1.22615	0.0112858	0.0366008	1.1642	0.219336
475	6-Hydroxynicotinic acid	3.9	level1			138.019	315.3	NEG	C6H5NO3	HMDB0002658	5006-66-6	C01020	Alkaloids	Nicotinic acid alkaloids	Pyridine alkaloids	BLHCMGRVFXRYRN-UHFFFAOYSA-N	0.023633	0.0256183	0.0248784	0.0247099	0.0220687	0.0201687	0.0198308	0.0206894	1.22132	0.0113509	0.0367461	0.837292	-0.256198
476	Urocanic acid	3.9	level1			137.035	308.7	NEG	C6H6N2O2	HMDB0000301	104-98-3	C00785	Alkaloids			LOIYMIARKYCTBW-OWOJBTEDSA-N	0.0229935	0.0256829	0.0185376	0.0224047	0.0525116	0.0556411	0.057091	0.0550812	1.31172	0.000192683	0.00254908	2.45847	1.29776
477	Tyramine	3.9	level1			138.091	240.7	POS	C8H11NO	HMDB0000306	51-67-2	C00483	Alkaloids	Tyrosine alkaloids	Phenylethylamines	DZGWFCGJZKJUFP-UHFFFAOYSA-N	0.147321	0.0844529	0.14972	0.127165	0.0275838	0.0206969	0.0258433	0.024708	1.29918	0.039733	0.0924769	0.194299	-2.36365
478	Val-Val	3.9	level1			215.14	234.1	NEG	C10H20N2O3	HMDB0029140	3918-94-3		Amino acids and Peptides	Small peptides	Dipeptides	KRNYOVHEKOBTEF-UHFFFAOYSA-N	0.100937	0.0978763	0.103468	0.10076	0.172221	0.179191	0.176668	0.176027	1.33894	8.48941e-06	0.000515555	1.74699	0.804869
479	Phe-Ala	3.9	level1			235.108	229.5	NEG	C12H16N2O3	HMDB0028988	3918-87-4		Amino acids and Peptides	Small peptides	Dipeptides	MIDZLCFIAINOQN-WPRPVWTQSA-N	0.0144702	0.0134434	0.0135921	0.0138352	0.0160435	0.0171749	0.0167284	0.0166489	1.27649	0.00359506	0.0163746	1.20337	0.267083
480	Isoverticine	3.9	level1			432.346	201.5	POS	C27H45NO3		23496-43-7		Alkaloids	Pseudoalkaloids	Steroidal alkaloids	IUKLSMSEHKDIIP-RZNVUHDWSA-N	0.00551621	0.00534362	0.00604633	0.00563539	0.0078804	0.00740435	0.00849141	0.00792539	1.27922	0.00378603	0.0169695	1.40636	0.491966
481	PC(18:0/14:0)	3.9	level1			734.567	169.6	POS	C40H80NO8P	HMDB0008031	20664-02-2		Fatty acids	Glycerophospholipids	Glycerophosphocholines	MZWGYEJOZNRLQE-KXQOOQHDSA-N	0.0489475	0.0480418	0.0551267	0.0507053	0.0789817	0.0949741	0.085491	0.0864823	1.29908	0.00225411	0.011968	1.70559	0.770267
482	PC(34:4)	3.9	level1			754.535	167.6	POS	C42H76NO8P							PUEZCLOAQGFTCJ-YHTOTGLMSA-N	0.0656556	0.064897	0.0676091	0.0660539	0.04807	0.0463132	0.0460213	0.0468015	1.33482	4.83307e-05	0.00119718	0.708535	-0.497089
483	Ferulate	3.9	level1			193.05	166.2	NEG	C10H10O4	HMDB0000954	537-98-4	C01494	Shikimates and Phenylpropanoids	Phenylpropanoids (C6-C3)	Cinnamic acids and derivatives	KSEBMYQBYZTDHS-HWKANZROSA-N	0.532153	0.458601	0.489508	0.49342	0.354508	0.358744	0.342754	0.352002	1.29518	0.00293748	0.0142754	0.713392	-0.487233
484	(Z)-9,12,13-trihydroxyoctadec-15-enoic acid	3.9	level1			329.233	153	NEG	C18H34O5				Fatty acids	Fatty Acids and Conjugates	Hydroxy fatty acids	DNWUYCUUEGGVPR-CLTKARDFSA-N	25.9625	29.3661	27.3927	27.5738	57.6159	60.5127	54.9767	57.7018	1.33194	8.84088e-05	0.00164313	2.09263	1.06532
485	PC(37:2)	3.9	level1			800.615	149	POS	C45H86NO8P							KKOZCDBORUPHQN-IWJLHGGLSA-N	0.017586	0.0209588	0.0218286	0.0201245	0.0164879	0.00902572	0.00986315	0.0117923	1.09788	0.0363754	0.0864903	0.585967	-0.771109
486	(2S,3R,4S,5S,6R)-2-(4-hydroxy-3-methoxy-phenoxy)-6-(hydroxymethyl)tetrahydropyran-3,4,5-triol	3.9	level1			301.092	148	NEG	C13H18O8		109194-60-7					KWVHACHAQJFTLZ-UJPOAAIJSA-N	0.605369	0.470993	0.597438	0.557933	0.875858	0.864306	0.844244	0.861469	1.25882	0.00241509	0.0125437	1.54404	0.626707
488	N6-Methyladenosine	3.9	level1			282.119	132.4	POS	C11H15N5O4	HMDB0004044	1867-73-8		Carbohydrates	Nucleosides	Purine nucleos(t)ides	VQAYFKKCNSOZKM-IOSLPCCCSA-N	0.0280564	0.0275106	0.0275962	0.0277211	0.0544609	0.0628686	0.0539595	0.0570963	1.32948	0.00935311	0.03199	2.05967	1.04242
490	Pyridoxine	3.9	level1			168.066	118.7	NEG	C8H11NO3	HMDB0000239	65-23-6	C00314	Alkaloids	Nicotinic acid alkaloids	Pyridine alkaloids	LXNHXLLTXMVWPM-UHFFFAOYSA-N	0.0586475	0.053695	0.0626583	0.0583336	0.0951646	0.0980862	0.0965385	0.0965964	1.32119	0.000149512	0.0022068	1.65593	0.727644
491	2-aminopyridin-3-ol	3.9	level1			109.041	69.2	NEG	C5H6N2O		16867-03-1		Amino acids and Peptides	Small peptides	Aminoacids	BMTSZVZQNMNPCT-UHFFFAOYSA-N	0.233028	0.180978	0.224023	0.212676	0.0972576	0.0633403	0.10641	0.0890027	1.24464	0.00396181	0.0175091	0.418489	-1.25674
493	Brevicuspisaponin 2	3.9	level1			485.327	53.2	NEG	C30H48O6		287716-32-9		Terpenoids	Triterpenoids	Ursane and Taraxastane triterpenoids	MDDPTIWFHAUVPJ-AEJFXDJYSA-N	0.0211688	0.0209106	0.0184468	0.0201754	0.0311712	0.0313658	0.0332932	0.0319434	1.31391	0.000433401	0.00409845	1.58329	0.662922
494	Caprolactam	3.9	level1			114.091	41.3	POS	C6H11NO	HMDB0062769	105-60-2	C06593	Alkaloids	Lysine alkaloids	Piperidine alkaloids	JBKVHLHDHHXQEQ-UHFFFAOYSA-N	0.0161763	0.0222924	0.0250567	0.0211751	0.003664	0.00160793	0.00384419	0.00303871	1.28139	0.0026287	0.0132749	0.143504	-2.80084
495	NAE(18:2)	3.9	level1			324.289	35.6	POS	C20H37NO2	HMDB0012252	68171-52-8		Fatty acids	Fatty amides	N-acyl ethanolamines (endocannabinoids)	KQXDGUVSAAQARU-HZJYTTRNSA-N	0.0290288	0.0337398	0.0262248	0.0296645	0.0478189	0.0382305	0.0398561	0.0419685	1.16316	0.0288808	0.0727346	1.41477	0.500571
497	Diglycine	3.89	level1			131.046	42	NEG	C4H8N2O3	HMDB0011733	556-50-3	C02037	Amino acids and Peptides	Small peptides	Dipeptides	YMAWOPBAYDPSLA-UHFFFAOYSA-N	1.41276	1.45703	1.46724	1.44568	0.42911	0.457048	0.421041	0.435733	1.34122	9.13635e-07	0.000214149	0.301404	-1.73023
501	Melibiose	3.89	level1			341.108	45.3	NEG	C12H22O11	HMDB0000048	60033-03-6	C05402	Carbohydrates	Saccharides	Disaccharides	DLRVVLDZNNYCBX-CQHUIXDMSA-N	6.77195	7.235	7.1547	7.05388	10.69	10.8313	9.59982	10.3737	1.30897	0.00131807	0.0083951	1.47064	0.556445
502	Isomaltose	3.89	level1			325.112	47.7	POS	C12H22O11	HMDB0002923	499-40-1	C00252	Carbohydrates	Saccharides	Disaccharides	DLRVVLDZNNYCBX-RTPHMHGBSA-N	0.103112	0.10457	0.0893876	0.0990231	0.20741	0.209256	0.212781	0.209816	1.3307	2.6281e-05	0.000881332	2.11886	1.08329
503	13(S)-HODE	3.89	level1			295.227	484.7	NEG	C18H32O3	HMDB0004667	29623-28-7	C14762	Fatty acids	Octadecanoids	Other Octadecanoids	HNICUWMFWZBIFP-IRQZEAMPSA-N	7.16046	7.63754	7.30979	7.36926	20.5802	16.6338	19.6826	18.9655	1.32904	0.00967095	0.0327458	2.5736	1.36379
504	5-Aminolevulinic acid	3.89	level1			130.051	50.8	NEG	C5H9NO3	HMDB0001149	106-60-5	C00430	Amino acids and Peptides	Small peptides	Aminoacids	ZGXJTSGNIOSYLO-UHFFFAOYSA-N	0.199717	0.220199	0.203015	0.207644	0.377679	0.402007	0.377031	0.385572	1.33249	6.81075e-05	0.00143256	1.85689	0.89289
505	(E,9S,12S,13S)-9,12,13-trihydroxyoctadec-10-enoic acid	3.89	level1			329.233	153	NEG	C18H34O5		97134-11-7	C14833	Fatty acids	Octadecanoids	Other Octadecanoids	MDIUMSLCYIJBQC-MVFSOIOZSA-N	25.9625	29.3661	27.3927	27.5738	57.6159	60.5127	54.9767	57.7018	1.33194	8.84088e-05	0.00164313	2.09263	1.06532
507	LPE(20:3)	3.89	level1			504.307	504.1	POS	C25H46NO7P	HMDB0011515			Fatty acids	Glycerophospholipids	Glycerophosphoethanolamines	YBDFPZJQBYCWBA-WMTBOZPISA-N	0.00301931	0.00357529	0.00362977	0.00340812	0.000429132	0.0008988	0.000881364	0.000736432	1.28117	0.000423271	0.00403311	0.216081	-2.21035
510	Soyasaponin I	3.89	level1			941.51	415.9	NEG	C48H78O18	HMDB0034649	51330-27-9	C08983	Terpenoids	Triterpenoids	Oleanane triterpenoids	PTDAHAWQAGSZDD-IOVCITQVSA-N	0.000425327	0.00106649	0.00161387	0.00103523	0.01121	0.0116196	0.00682567	0.00988512	1.26016	0.0049003	0.0202901	9.54873	3.25531
511	Isophorone	3.89	level1			139.111	355.4	POS	C9H14O	HMDB0031195	78-59-1	C14743	Terpenoids	Apocarotenoids	Apocarotenoids(ε-)	HJOVHMDZYOCNQW-UHFFFAOYSA-N	0.0141875	0.0149737	0.0146294	0.0145969	0.0318825	0.0372908	0.0362704	0.0351479	1.33299	0.00571921	0.0225982	2.40791	1.26778
513	2-(4-Hydroxy-4,8-dimethyl-6-oxo-7-propan-2-yl-1-bicyclo[3.2.1]octanyl)acetic acid	3.89	level1			267.16	321.2	NEG	C15H24O4				Terpenoids	Sesquiterpenoids	Cadinane sesquiterpenoids	CQETYAKZUYZHOB-UHFFFAOYSA-N	0.0489278	0.0549052	0.0471024	0.0503118	0.0908421	0.119849	0.106172	0.105621	1.30117	0.00314175	0.0149377	2.09932	1.06993
514	Indole-3-carboxylic acid	3.89	level1			160.04	316.6	NEG	C9H7NO2	HMDB0003320	771-50-6	C19837	Alkaloids	Tryptophan alkaloids	Simple indole alkaloids	KMAKOBLIOCQGJP-UHFFFAOYSA-N	0.0241467	0.0255273	0.0317284	0.0271341	0.0160038	0.0169324	0.0181234	0.0170199	1.25041	0.0137467	0.0422023	0.62725	-0.672888
515	Veratraldehyde	3.89	level1			167.07	284.8	POS	C9H10O3	HMDB0032138	120-14-9	C02201	Shikimates and Phenylpropanoids	Phenylpropanoids (C6-C3)	Cinnamic acids and derivatives	WJUFSDZVCOTFON-UHFFFAOYSA-N	0.0667486	0.0590568	0.0628352	0.0628802	0.0445075	0.0463627	0.0464547	0.045775	1.30448	0.00177254	0.0102162	0.727971	-0.458047
516	7-hydroxy-3-(hydroxymethyl)-5-methyl-isochromen-1-one	3.89	level1			207.064	284	POS	C11H10O4				Shikimates and Phenylpropanoids	Coumarins	Isocoumarins	LTGJEIZAUFPWTC-UHFFFAOYSA-N	0.0980199	0.0868784	0.0831209	0.0893397	0.0238051	0.0251585	0.0217364	0.0235667	1.33571	0.000136959	0.00210018	0.263787	-1.92255
517	Benzamide	3.89	level1			122.06	238.8	POS	C7H7NO	HMDB0004461	55-21-0	C09815	Alkaloids	Peptide alkaloids	Simple amide alkaloids	KXDAEFPNCMNJSK-UHFFFAOYSA-N	0.00968145	0.00939595	0.0100887	0.00972202	0.0111668	0.0113007	0.0117593	0.0114089	1.27715	0.00331896	0.0155131	1.17352	0.230837
519	3,5-dimethoxy-4-[(2S,3R,4S,5S,6R)-3,4,5-trihydroxy-6-(hydroxymethyl)tetrahydropyran-2-yl]oxy-benzoic acid	3.89	level1			359.098	214.6	NEG	C15H20O10		33228-65-8		Shikimates and Phenylpropanoids	Phenolic acids (C6-C1)	Simple phenolic acids	BLKMDORKRDACEI-OVKLUEDNSA-N	0.724847	0.760909	0.749834	0.745196	3.74437	3.69667	3.54076	3.6606	1.34182	1.25521e-06	0.00024154	4.91226	2.29639
520	4-Oxohexanoic acid	3.89	level1			129.056	197.5	NEG	C6H10O3		1117-74-4		Fatty acids	Fatty Acids and Conjugates	Oxo fatty acids	CLJBDOUIEHLLEN-UHFFFAOYSA-N	2.39384	2.64397	2.59574	2.54452	1.87603	1.93327	1.84037	1.88323	1.31105	0.00124001	0.00805273	0.740111	-0.434186
521	5,10-methylene-THF	3.89	level1			456.163	135.5	NEG	C20H23N7O6	HMDB0001533	31690-11-6	C00143	Alkaloids	Histidine alkaloids	Imidazole alkaloids	QYNUQALWYRSVHF-PZORYLMUSA-N	0.0112742	0.00971274	0.011145	0.0107107	0.0265048	0.021072	0.0213895	0.0229888	1.30865	0.00256937	0.0130805	2.14635	1.10188
522	N-Acetylputrescine	3.89	level1			131.117	46.2	POS	C6H14N2O	HMDB0002064	18233-70-0	C02714	Alkaloids	Ornithine alkaloids	Polyamines	KLZGKIDSEJWEDW-UHFFFAOYSA-N	0.0525779	0.0494974	0.0517444	0.0512732	0.0733612	0.0781946	0.0734097	0.0749885	1.32835	0.000212696	0.00270042	1.46253	0.548464
525	Tomatine	3.89	level1			1034.55	308.1	POS	C50H83NO21	HMDB0034103	17406-45-0	C10827	Alkaloids	Pseudoalkaloids	Steroidal alkaloids	REJLGAUYTKNVJM-UHFFFAOYSA-N	10.3323	10.3073	10.4548	10.3648	11.7937	11.6232	12.1535	11.8568	1.3148	0.000787081	0.00598627	1.14395	0.19402
526	UDP-N-acetylglucosamine	3.89	level1			606.073	447.4	NEG	C17H27N3O17P2	HMDB0000290	528-04-1	C00043	Carbohydrates	Aminosugars and aminoglycosides	Aminosugars	LFTYTUAZOPRMMI-CFRASDGPSA-N	0.000664381	0.000321972	0.000638901	0.000541751	1.17124e-05	1.19512e-05	1.11134e-05	1.15923e-05	1.33175	0.0405488	0.0938802	0.0213979	-5.54639
527	Arg-Ala	3.89	level1			246.155	440.2	POS	C9H19N5O3	HMDB0028702	40968-45-4		Amino acids and Peptides	Small peptides	Dipeptides	WVRUNFYJIHNFKD-WDSKDSINSA-N	0.109881	0.0976805	0.106954	0.104839	0.162837	0.157718	0.173123	0.16456	1.31734	0.000513463	0.00457928	1.56965	0.650438
530	3-Hydroxypyruvic acid	3.89	level1			103.003	409.6	NEG	C3H4O4	HMDB0001352	1113-60-6	C00168	Fatty acids	Fatty Acids and Conjugates		HHDDCCUIIUWNGJ-UHFFFAOYSA-N	10.2034	11.2521	10.7489	10.7348	7.61031	7.51967	7.20245	7.44415	1.32195	0.000548952	0.00476315	0.693457	-0.528121
531	Pyruvaldehyde	3.89	level1			71.0138	393	NEG	C3H4O2	HMDB0001167	78-98-8	C00546	Fatty acids	Fatty acyls	Fatty aldehydes	AIJULSRZWUXGPQ-UHFFFAOYSA-N	0.41237	0.442183	0.433975	0.429509	0.332389	0.337898	0.312258	0.327515	1.3078	0.000992672	0.0069528	0.762533	-0.391128
532	Allantoic acid	3.89	level1			177.061	377.2	POS	C4H8N4O4	HMDB0001209	99-16-1	C00499	Alkaloids	Pseudoalkaloids	Purine alkaloids	NUCLJNSWZCHRKL-UHFFFAOYSA-N	0.0148367	0.0135965	0.0143488	0.0142607	0.00360551	0.00311909	0.00268247	0.00313569	1.33296	1.56826e-05	0.00068225	0.219884	-2.18519
534	Thr-Leu	3.89	level1			231.134	266.9	NEG	C10H20N2O4	HMDB0029065	50299-12-2		Amino acids and Peptides	Small peptides	Dipeptides	BQBCIBCLXBKYHW-CSMHCCOUSA-N	0.0918537	0.0839038	0.0869558	0.0875711	0.180179	0.182006	0.205035	0.189073	1.33188	0.000259931	0.00300512	2.15908	1.11042
535	Pro-Phe	3.89	level1			263.138	258.3	POS	C14H18N2O3	HMDB0011179	13589-02-1		Amino acids and Peptides	Small peptides	Dipeptides	IWIANZLCJVYEFX-RYUDHWBXSA-N	0.0154928	0.0142416	0.0161621	0.0152988	0.0280572	0.0233918	0.0306762	0.0273751	1.28466	0.0053959	0.0217022	1.78936	0.839441
536	Thr-Phe	3.89	level1			265.119	247.7	NEG	C13H18N2O4	HMDB0029068	16875-27-7		Amino acids and Peptides	Small peptides	Dipeptides	IQHUITKNHOKGFC-MIMYLULJSA-N	0.0300167	0.0183391	0.0185052	0.022287	0.0376311	0.0438438	0.0389557	0.0401435	1.1779	0.0142534	0.043289	1.80121	0.848965
537	Cytosine	3.89	level1			112.05	212.1	POS	C4H5N3O	HMDB0000630	71-30-7	C00380	Alkaloids	Histidine alkaloids	Imidazole alkaloids	OPTASPLRGRRNAP-UHFFFAOYSA-N	0.0404626	0.0392323	0.0414102	0.0403684	0.0988774	0.0997907	0.0991228	0.0992636	1.34159	1.10986e-07	0.000105045	2.45895	1.29804
538	Arachidonoylcarnitine (Car(20:4))	3.89	level1			448.341	201.5	POS	C27H45NO4	HMDB0006455	36816-11-2		Fatty acids	Fatty esters	Fatty acyl carnitines	RBFQHRALHSUPIA-JTPUQHSZSA-N	0.136808	0.108071	0.136552	0.127143	0.0266474	0.028731	0.0334349	0.0296044	1.32901	0.000560155	0.004826	0.232843	-2.10257
539	(1S,5R,8S,9S)-7,9-dihydroxy-2,5,9-trimethyltricyclo[6.3.0.01,5]undec-2-ene-3-carboxylic acid	3.89	level1			265.144	120.9	NEG	C15H22O4				Terpenoids	Sesquiterpenoids	Eudesmane sesquiterpenoids	JVWMEYMYQAAGMM-VDEZILSRSA-N	0.259729	0.252262	0.248859	0.253616	0.349693	0.374165	0.369657	0.364505	1.33048	0.000171088	0.0023842	1.43723	0.523291
540	trans-4-Hydroxycyclohexanecarboxylic acid	3.89	level1			143.071	53.8	NEG	C7H12O3	HMDB0001988	17419-81-7	C04404	Amino acids and Peptides			HCFRWBBJISAZNK-UHFFFAOYSA-N	0.0441456	0.0478578	0.0396957	0.0438997	0.0218038	0.0295021	0.0268147	0.0260402	1.24907	0.00542985	0.0217919	0.593176	-0.753468
541	(E)-3-(4-hydroxy-3,5-dimethoxy-phenyl)-N-[2-(4-hydroxyphenyl)ethyl]prop-2-enamide	3.89	level1			344.148	38.8	POS	C19H21NO5		200125-11-7		Shikimates and Phenylpropanoids	Phenylpropanoids (C6-C3)	Cinnamic acid amides	IEDBNTAKVGBZEP-VMPITWQZSA-N	1.71701	1.52726	1.61638	1.62022	1.45023	1.44904	1.33077	1.41001	1.12947	0.035936	0.0857074	0.87026	-0.200482
542	Solasodine	3.89	level1			414.336	36.6	POS	C27H43NO2	HMDB0035282	126-17-0	C10822	Alkaloids	Pseudoalkaloids	Steroidal alkaloids	KWVISVAMQJWJSZ-UHFFFAOYSA-N	2.79407	2.74216	2.85979	2.79867	1.38471	0.844327	1.48609	1.23838	1.23586	0.00151457	0.00920386	0.442487	-1.17629
545	(2S,3R,4S,5S,6R)-2-[4-[(3R,3aR,6R,6aR)-6-[3,5-dimethoxy-4-[(2S,3R,4S,5S,6R)-3,4,5-trihydroxy-6-(hydroxymethyl)tetrahydropyran-2-yl]oxy-phenyl]-1,3,3a,4,6,6a-hexahydrofuro[3,4-c]furan-3-yl]-2,6-dimethoxy-phenoxy]-6-(hydroxymethyl)tetrahydropyran-3,4,5-triol	3.88	level1			741.261	252.4	NEG	C34H46O18		96038-87-8		Shikimates and Phenylpropanoids	Lignans	Furofuranoid lignans	FFDULTAFAQRACT-UERZRVEUSA-N	0.304088	0.33953	0.315982	0.319867	0.785472	0.676696	0.753171	0.738446	1.33097	0.00024699	0.0029154	2.30861	1.20702
546	Scopolin	3.88	level1			353.088	235.2	NEG	C16H18O9		531-44-2	C01527	Shikimates and Phenylpropanoids	Coumarins	Simple coumarins	SGTCGCCQZOUMJJ-YMILTQATSA-N	0.13038	0.132845	0.111517	0.124914	0.0491132	0.0578628	0.0590706	0.0553489	1.317	0.000725096	0.0056832	0.443095	-1.17431
547	Polygalacic acid	3.88	level1			503.337	424.1	NEG	C30H48O6		22338-71-2		Terpenoids	Triterpenoids	Oleanane triterpenoids	KGGGRGBDMBZXKF-KZMOAHQXSA-N	0.00274018	0.00401801	0.00514337	0.00396719	0.374651	0.285999	0.364411	0.341687	1.33668	0.00677729	0.0254531	86.1283	6.42842
550	(2R,3S,4S,5R,6R)-2-[[(2R,3R,4R)-3,4-dihydroxy-4-(hydroxymethyl)tetrahydrofuran-2-yl]oxymethyl]-6-[(2E)-3,7-dimethylocta-2,6-dienoxy]tetrahydropyran-3,4,5-triol	3.88	level1			429.213	348.3	NEG	C21H36O10		120163-17-9		Terpenoids	Monoterpenoids	Acyclic monoterpenoids	RFFYIBOJHUSIGD-PHDUQKSESA-N	0.217214	0.25227	0.222721	0.230735	0.554739	0.537432	0.507316	0.533162	1.33146	6.75835e-05	0.00142607	2.31071	1.20834
551	2-Pyrimidinylacetic acid	3.88	level1			137.035	308.7	NEG	C6H6N2O2		66621-73-6		Alkaloids	Nicotinic acid alkaloids	Pyridine alkaloids	NRRCYZPJUABYHL-UHFFFAOYSA-N	0.0229935	0.0256829	0.0185376	0.0224047	0.0525116	0.0556411	0.057091	0.0550812	1.31172	0.000192683	0.00254908	2.45847	1.29776
553	D-Panose	3.88	level1			503.161	46.1	NEG	C18H32O16				Carbohydrates	Saccharides	Polysaccharides	ZCLAHGAZPPEVDX-MQHGYYCBSA-N	0.0812565	0.0871729	0.0828615	0.0837636	0.0432138	0.0588887	0.0597995	0.0539673	1.21204	0.0062582	0.024082	0.644281	-0.634237
555	Isovaleramide	3.88	level1			102.091	645	POS	C5H11NO		541-46-8	D04637	Alkaloids	Peptide alkaloids		SANOUVWGPVYVAV-UHFFFAOYSA-N	0.154397	0.155462	2.05203	0.787297	3.52282	2.9433	2.34812	2.93808	1.02599	0.0400457	0.0930202	3.73186	1.8999
556	LPE(17:0)	3.88	level1			468.307	528.6	POS	C22H46NO7P	HMDB0061691			Fatty acids	Glycerophospholipids	Glycerophosphoethanolamines	RVNBVQKDPQVSOY-OAQYLSRUSA-N	0.0958056	0.0964396	0.101585	0.0979435	0.154789	0.135534	0.125301	0.138541	1.25729	0.0100706	0.0337017	1.4145	0.500294
559	4-tert-Octylphenol	3.88	level1			205.159	496.6	NEG	C14H22O	HMDB0013825	140-66-9	C14205				ISAVYTVYFVQUDY-UHFFFAOYSA-N	0.133589	0.130597	0.147095	0.137094	0.0422727	0.0582677	0.0453607	0.0486337	1.31726	0.000232576	0.00281153	0.354747	-1.49514
560	MG(18:2)	3.88	level1			355.283	488	POS	C21H38O4				Fatty acids	Glycerolipids	Monoacylglycerols	ZJFLBJZBACMLBL-MLSIJCRPSA-N	0.0400907	0.0294639	0.0308418	0.0334655	0.0573964	0.0549629	0.0587201	0.0570265	1.26458	0.00257261	0.0130911	1.70404	0.768959
562	4,5-dihydroxy-6-[(E)-2-(4-hydroxy-1,3-dimethyl-cyclohexyl)vinyl]-3-methoxy-4-phenyl-1,3-dihydroquinolin-2-one	3.88	level1			436.213	395.9	NEG	C26H31NO5				Alkaloids	Tryptophan alkaloids	Quinoline alkaloids	VHCOEFMALBJZLE-ACCUITESSA-N	0.0168016	0.0254785	0.0158118	0.019364	0.00313739	0.00432139	0.00659016	0.00468298	1.26264	0.0104934	0.0347232	0.24184	-2.04788
563	Sanguic acid	3.88	level1			517.317	380.7	NEG	C30H46O7		821797-62-0		Terpenoids	Triterpenoids	Ursane and Taraxastane triterpenoids	FYGSMJAMPMZYFS-CAHUUPCNSA-N	0.00117184	0.00247861	0.00250326	0.00205124	0.0214603	0.0158852	0.0182266	0.018524	1.30543	0.000599498	0.00503795	9.03067	3.17483
565	Tryptophol	3.88	level1			160.077	319.2	NEG	C10H11NO	HMDB0003447	526-55-6	C00955	Alkaloids	Tryptophan alkaloids	Simple indole alkaloids	MBBOMCVGYCRMEA-UHFFFAOYSA-N	0.00584759	0.00728491	0.007015	0.00671583	0.0265141	0.0281751	0.0271468	0.0272786	1.33518	6.12857e-06	0.000442382	4.06184	2.02213
566	Indole-3-carboxaldehyde	3.88	level1			144.045	311.9	NEG	C9H7NO	HMDB0029737	487-89-8	C08493	Alkaloids	Tryptophan alkaloids	Simple indole alkaloids	OLNJUISKUQQNIM-UHFFFAOYSA-N	0.0551698	0.0565959	0.0530621	0.0549426	0.060564	0.0635451	0.0641666	0.0627586	1.25045	0.00667404	0.025196	1.14226	0.191887
569	2-[4-[hydroxy-[5-(4-hydroxy-3-methoxyphenyl)-4-(hydroxymethyl)oxolan-3-yl]methyl]-2-methoxyphenoxy]-6-(hydroxymethyl)oxane-3,4,5-triol	3.88	level1			537.198	229.8	NEG	C26H34O12				Shikimates and Phenylpropanoids	Lignans	Furanoid lignans	LDDSFQCOUIDFIZ-UHFFFAOYSA-N	0.0680002	0.0706989	0.0778616	0.0721869	0.0985393	0.0888603	0.0941191	0.0938396	1.2539	0.00595285	0.0232408	1.29995	0.37846
570	Xanthosine	3.88	level1			283.068	135.2	NEG	C10H12N4O6	HMDB0000299	146-80-5	C01762	Carbohydrates	Nucleosides	Purine nucleos(t)ides	UBORTCNDUKBEOP-UUOKFMHZSA-N	0.0906	0.087675	0.0913248	0.0898666	0.0373838	0.037821	0.0350669	0.0367572	1.34	2.92746e-06	0.000328628	0.40902	-1.28976
571	Tyrosine	3.88	level1			182.081	74.5	POS	C9H11NO3	HMDB0000158	60-18-4	C00082	Amino acids and Peptides	Small peptides	Aminoacids	OUYCCCASQSFEME-QMMMGPOBSA-N	0.135445	0.0965794	0.129586	0.120537	0.0204533	0.0201537	0.017631	0.0194127	1.33115	0.0136352	0.0419488	0.161052	-2.6344
572	Glutathione disulfide	3.88	level1			611.145	72.4	NEG	C20H32N6O12S2	HMDB0003337	27025-41-8	C00127	Amino acids and Peptides	Small peptides	Tripeptides	YPZRWBKMTBYPTK-BJDJZHNGSA-N	0.0119532	0.0108944	0.00985971	0.0109024	0.0185209	0.015125	0.0200416	0.0178958	1.24413	0.0113054	0.0366441	1.64146	0.714975
573	N-Acetyl-beta-alanine	3.88	level1			130.051	64.5	NEG	C5H9NO3	HMDB0061880	3025-95-4	C01073	Amino acids and Peptides	Small peptides	Dipeptides	LJLLAWRMBZNPMO-UHFFFAOYSA-N	0.107715	0.104316	0.0979097	0.103314	0.188973	0.221638	0.202216	0.204276	1.3257	0.000523259	0.00462719	1.97724	0.983488
574	Isocitric acid	3.88	level1			191.019	61.1	NEG	C6H8O7	HMDB0000193	320-77-4	C00311	Fatty acids	Fatty Acids and Conjugates	Dicarboxylic acids	ODBLHEXUDAPZAU-UHFFFAOYSA-N	53.6095	59.3639	50.843	54.6055	61.6708	64.0612	66.795	64.1757	1.13723	0.0303717	0.0755262	1.17526	0.232981
578	Thymidine	3.88	level1			241.083	93.6	NEG	C10H14N2O5	HMDB0000273	50-89-5	C00214	Carbohydrates	Nucleosides	Pyrimidine nucleos(t)ides	IQFYYKKMVGJFEH-XLPZGREQSA-N	0.942547	1.1401	1.0636	1.04875	0.636833	0.659163	0.601904	0.632633	1.30515	0.0022522	0.0119599	0.603226	-0.729231
579	N-Acetylaspartic acid	3.88	level1			174.04	409.2	NEG	C6H9NO5	HMDB0000812	997-55-7	C01042	Amino acids and Peptides	Small peptides	Dipeptides	OTCCIMWXFLJLIA-BYPYZUCNSA-N	0.0402624	0.0366436	0.0387612	0.0385557	0.0294703	0.0312273	0.027627	0.0294416	1.27384	0.0035044	0.0161	0.763611	-0.38909
580	Arg-Phe	3.88	level1			322.187	362.5	POS	C15H23N5O3	HMDB0028716	2047-13-4		Amino acids and Peptides	Small peptides	Dipeptides	PQBHGSGQZSOLIR-RYUDHWBXSA-N	0.0108312	0.0106681	0.0107775	0.0107589	0.0152582	0.0156881	0.0159546	0.0156336	1.33874	1.98291e-05	0.000767228	1.45309	0.539119
582	Gly-Gly-Leu	3.88	level1			244.13	322.6	NEG	C10H19N3O4		14857-82-0		Amino acids and Peptides	Small peptides	Tripeptides	XPJBQTCXPJNIFE-ZETCQYMHSA-N	0.0155105	0.0146556	0.0167239	0.01563	0.123964	0.1187	0.134502	0.125722	1.34071	0.00152844	0.0092581	8.04365	3.00785
583	Valerylcarnitine	3.88	level1			246.169	261.6	POS	C12H23NO4	HMDB0013128	40225-14-7		Fatty acids	Fatty esters	Fatty acyl carnitines	VSNFQQXVMPSASB-SNVBAGLBSA-N	0.0128257	0.0102293	0.0126535	0.0119028	0.00780924	0.00812607	0.00835463	0.00809665	1.24607	0.0111442	0.0362716	0.680229	-0.555908
584	Deoxycytidine	3.88	level1			226.083	224.2	NEG	C9H13N3O4	HMDB0000014	951-77-9	C00881	Carbohydrates	Nucleosides	Pyrimidine nucleos(t)ides	CKTSBUTUHBMZGZ-SHYZEUOFSA-N	0.00394762	0.005099	0.00488326	0.00464329	0.00837692	0.00803483	0.0065702	0.00766065	1.22964	0.0100966	0.0337634	1.64983	0.722319
585	5-Methylcytosine	3.88	level1			126.066	204.1	POS	C5H7N3O	HMDB0002894	554-01-8	C02376	Alkaloids	Pseudoalkaloids	pteridine alkaloids	LRSASMSXMSNRBT-UHFFFAOYSA-N	0.0782405	0.0714593	0.0812099	0.0769699	0.219798	0.210813	0.229869	0.22016	1.3376	2.10223e-05	0.00078849	2.86034	1.51619
587	L-Fucitol	3.88	level1			165.077	197.9	NEG	C6H14O5	HMDB0304954	13074-06-1		Fatty acids	Fatty acyls	Fatty alcohols	SKCKOFZKJLZSFA-KCDKBNATSA-N	0.135833	0.147348	0.146125	0.143102	0.0764921	0.077307	0.0771082	0.0769691	1.3382	0.00292781	0.0142437	0.537863	-0.89469
590	PC(16:0/20:4)	3.88	level1			782.565	165	POS	C44H80NO8P	HMDB0007982	35418-58-7		Fatty acids	Glycerophospholipids	Glycerophosphocholines	IIZPXYDJLKNOIY-JXPKJXOSSA-N	3.27979	3.1962	3.37611	3.28403	2.31766	2.43154	2.238	2.32907	1.32424	0.000237165	0.0028415	0.709209	-0.495717
595	alpha-Ketoisovaleric acid	3.88	level1			115.04	68.6	NEG	C5H8O3	HMDB0000019	759-05-7	C00141	Fatty acids	Fatty Acids and Conjugates	Branched fatty acids	QHKABHOOEWYVLI-UHFFFAOYSA-N	4.01059	4.54639	4.31916	4.29205	3.46626	3.51272	3.2472	3.40873	1.25604	0.00732134	0.0268846	0.794197	-0.332432
596	2-Ketocaproic acid	3.88	level1			129.055	58.2	NEG	C6H10O3	HMDB0001864	2492-75-3	C00902	Fatty acids	Fatty Acids and Conjugates	Oxo fatty acids	XNIHZNNZJHYHLC-UHFFFAOYSA-N	22.281	23.0841	21.5672	22.3108	14.9099	15.7108	14.2389	14.9532	1.32314	0.000272184	0.00308784	0.670223	-0.577287
598	12(S)-HHTrE	3.88	level1			279.196	53.5	NEG	C17H28O3	HMDB0012535	54397-84-1	C20388	Fatty acids	Fatty Acids and Conjugates	Hydroxy fatty acids	KUKJHGXXZWHSBG-WBGSEQOASA-N	0.484558	0.680284	0.58534	0.583394	0.220214	0.158593	0.107563	0.162123	1.26763	0.00295869	0.0143465	0.277897	-1.84738
603	Indoxyl sulfate	3.88	level1			212.003	20	NEG	C8H7NO4S	HMDB0000682	487-94-5		Alkaloids	Tryptophan alkaloids	Simple indole alkaloids	BXFFHSIDQOFMLE-UHFFFAOYSA-N	0.0654888	0.00726934	0.0115559	0.0281047	0.499242	0.513156	0.572358	0.528252	1.2507	6.82716e-05	0.00143396	18.7959	4.23234
604	(1S,4aR,6aS,6bR,9S,10R,11R,12aR,14bS)-1,10,11-trihydroxy-9-(hydroxymethyl)-2,2,6a,6b,9,12a-hexamethyl-1,3,4,5,6,6a,7,8,8a,10,11,12,13,14b-tetradecahydropicene-4a-carboxylic acid	3.87	level1			503.337	424.1	NEG	C30H48O6		55306-03-1		Terpenoids	Triterpenoids	Oleanane triterpenoids	IFIQVSCCFRXSJV-UFTBQYHPSA-N	0.00274018	0.00401801	0.00514337	0.00396719	0.374651	0.285999	0.364411	0.341687	1.33668	0.00677729	0.0254531	86.1283	6.42842
606	(5R,10S,13R,14R,17R)-17-[(1R,4S)-4,5-dihydroxy-1,5-dimethyl-hexyl]-4,4,10,13,14-pentamethyl-2,5,6,11,12,15,16,17-octahydro-1H-cyclopenta[a]phenanthrene-3,7-dione	3.87	level1			471.347	51.4	NEG	C30H48O4		217476-73-8		Terpenoids	Triterpenoids	Lanostane, Tirucallane and Euphane triterpenoids	LVGCWXNRZNCAJG-AMKDLFIQSA-N	0.0166351	0.00779718	0.00808514	0.0108391	0.0272179	0.0432944	0.0358072	0.0354398	1.22257	0.0108792	0.0356443	3.26961	1.70912
607	Hydroferulic acid	3.87	level1			195.066	151.5	NEG	C10H12O4	HMDB0062121	1135-23-5		Shikimates and Phenylpropanoids			BOLQJTPHPSDZHR-UHFFFAOYSA-N	0.158432	0.149605	0.157216	0.155084	0.214668	0.223188	0.216716	0.218191	1.33212	7.47386e-05	0.00150374	1.40692	0.492536
610	(E)-9,12,13-trihydroxyoctadec-10-enoic acid	3.87	level1			329.233	153	NEG	C18H34O5		29907-56-0|97134-11-7		Fatty acids	Octadecanoids	Other Octadecanoids	MDIUMSLCYIJBQC-BUHFOSPRSA-N	25.9625	29.3661	27.3927	27.5738	57.6159	60.5127	54.9767	57.7018	1.33194	8.84088e-05	0.00164313	2.09263	1.06532
611	Manninotriose	3.87	level1			503.161	46.1	NEG	C18H32O16	HMDB0247628	13382-86-0		Carbohydrates	Saccharides	Polysaccharides	FZWBNHMXJMCXLU-UHFFFAOYSA-N	0.0812565	0.0871729	0.0828615	0.0837636	0.0432138	0.0588887	0.0597995	0.0539673	1.21204	0.0062582	0.024082	0.644281	-0.634237
613	PC(37:5)	3.87	level1			794.574	602.3	POS	C45H80NO8P	HMDB0007956			Fatty acids	Glycerophospholipids	Glycerophosphocholines	HRTXZWFRPLOXSH-UJOYSCBBSA-N	0.00872965	0.0110219	0.010869	0.0102069	0.0219418	0.0185304	0.0199541	0.0201421	1.29737	0.00129765	0.00830408	1.97339	0.980673
616	NAE(18:3(9Z,12Z,15Z))	3.87	level1			322.273	501.5	POS	C20H35NO2	HMDB0013624	57086-93-8		Fatty acids	Fatty amides	N-acyl ethanolamines (endocannabinoids)	HBJXRRXWHSHZPU-PDBXOOCHSA-N	0.0189405	0.0165729	0.0199969	0.0185034	0.00896685	0.00748039	0.00931456	0.00858727	1.3082	0.00102146	0.00707842	0.464091	-1.10752
617	α-Cyperone	3.87	level1			219.173	475.6	POS	C15H22O		473-08-5	C17090	Terpenoids	Sesquiterpenoids	Eudesmane sesquiterpenoids	KUFXJZXMWHNCEH-DOMZBBRYSA-N	0.111787	0.10701	0.106001	0.108266	0.0622518	0.0594374	0.0470436	0.0562443	1.29667	0.000482239	0.00439708	0.519502	-0.944798
621	Sinapyl alcohol	3.87	level1			209.082	269.3	NEG	C11H14O4	HMDB0013070	537-33-7	C02325	Shikimates and Phenylpropanoids	Phenylpropanoids (C6-C3)	Cinnamic acids and derivatives	LZFOPEXOUVTGJS-ONEGZZNKSA-N	0.0421398	0.0334575	0.0370655	0.0375543	0.02682	0.0309349	0.0293738	0.0290429	1.14001	0.037973	0.0893711	0.773358	-0.370792
624	3-Methyladipic acid	3.87	level1			159.066	253.9	NEG	C7H12O4	HMDB0000555	3058-01-3		Fatty acids	Fatty Acids and Conjugates	Dicarboxylic acids	SYEOWUNSTUDKGM-YFKPBYRVSA-N	0.497853	0.566502	0.539162	0.534506	0.361056	0.408881	0.369806	0.379914	1.28262	0.00336645	0.0156611	0.710777	-0.492531
625	Pimelic acid	3.87	level1			159.066	253.9	NEG	C7H12O4	HMDB0000857	111-16-0	C02656	Fatty acids	Fatty Acids and Conjugates	Dicarboxylic acids	WLJVNTCWHIRURA-UHFFFAOYSA-N	0.497853	0.566502	0.539162	0.534506	0.361056	0.408881	0.369806	0.379914	1.28262	0.00336645	0.0156611	0.710777	-0.492531
626	4-(3-hydroxyprop-1-enyl)-2,6-dimethoxy-phenol	3.87	level1			209.082	241.1	NEG	C11H14O4		537-33-7		Shikimates and Phenylpropanoids	Phenylpropanoids (C6-C3)	Cinnamic acids and derivatives	LZFOPEXOUVTGJS-UHFFFAOYSA-N	0.020658	0.0234164	0.0214799	0.0218514	0.0777261	0.0583962	0.0610602	0.0657275	1.32235	0.0170534	0.0493047	3.00793	1.58877
628	(2R,3R,4S,5S,6R)-2-[[(2R,3S,4S,5R,6R)-6-benzyloxy-3,4,5-trihydroxy-tetrahydropyran-2-yl]methoxy]-6-(hydroxymethyl)tetrahydropyran-3,4,5-triol	3.87	level1			431.156	234.5	NEG	C19H28O11		56775-64-5					LLEMMFPELBNINR-SKYGPZSASA-N	3.03299	2.8805	2.99101	2.96817	1.91095	1.78001	1.75183	1.81427	1.33148	6.61786e-05	0.00141264	0.611241	-0.710187
629	2'-O-Methyluridine	3.87	level1			257.078	130.4	NEG	C10H14N2O6	HMDB0240328	2140-76-3		Carbohydrates	Nucleosides	Pyrimidine nucleos(t)ides	SXUXMRMBWZCMEN-ZOQUXTDFSA-N	0.0486291	0.0535197	0.0570942	0.053081	0.0291187	0.0280496	0.0291795	0.0287826	1.32652	0.00887016	0.0308226	0.542239	-0.882999
631	3-Amino-3-(4-hydroxyphenyl)propanoic acid	3.87	level1			182.081	51.5	POS	C9H11NO3	HMDB0003831	6049-54-3	C04368	Amino acids and Peptides	Small peptides	Aminoacids	JYPHNHPXFNEZBR-UHFFFAOYSA-N	0.125926	0.0925244	0.123184	0.113878	0.0184752	0.0131899	0.0200295	0.0172316	1.32259	0.000895	0.00651208	0.151316	-2.72436
632	Epinephrine	3.87	level1			166.086	47.2	POS	C9H13NO3	HMDB0062515	329-65-7	D00095	Alkaloids	Tyrosine alkaloids	Phenylethylamines	UCTWMZQNUQWSLP-UHFFFAOYSA-N	0.611913	0.56087	0.625751	0.599511	0.99238	0.887791	0.881738	0.920636	1.30698	0.00143177	0.00887247	1.53564	0.618845
634	S-Methylmethionine	3.87	level1			164.073	45	POS	C6H14NO2S	HMDB0038670	13065-25-3	C05319	Amino acids and Peptides	Small peptides	Aminoacids	YDBYJHTYSHBBAU-UHFFFAOYSA-O	0.0891832	0.0921632	0.0837891	0.0883785	0.0970876	0.0963012	0.0939196	0.0957694	1.08359	0.0482636	0.107203	1.08363	0.11587
636	O-Acetylserine	3.87	level1			146.046	317.3	NEG	C5H9NO4	HMDB0003011	5147-00-2	C00979	Amino acids and Peptides	Small peptides	Aminoacids	VZXPDPZARILFQX-BYPYZUCNSA-N	0.345169	0.331694	0.348873	0.341912	0.281773	0.277803	0.283902	0.281159	1.32297	0.000386569	0.00381592	0.822315	-0.282238
637	3-AMINO-2-PIPERIDONE	3.87	level1			115.086	218.8	POS	C5H10N2O	HMDB0000323	1892-22-4		Alkaloids	Lysine alkaloids	Piperidine alkaloids	YCCMTCQQDULIFE-UHFFFAOYSA-N	0.009881	0.00355679	0.00426037	0.00589939	0.019933	0.0206295	0.0229052	0.0211559	1.22177	0.00224407	0.0119332	3.58612	1.84242
639	Vanillic acid	3.87	level1			167.035	181.7	NEG	C8H8O4	HMDB0000484	121-34-6	C06672	Shikimates and Phenylpropanoids	Phenolic acids (C6-C1)	Cinnamic acids and derivatives	WKOLLVMJNQIZCI-UHFFFAOYSA-N	0.155054	0.15825	0.188564	0.167289	0.469596	0.4608	0.466568	0.465655	1.3323	1.09233e-05	0.000587984	2.78353	1.47692
640	Betaxolol	3.87	level1			308.221	95.4	POS	C18H29NO3	HMDB0014341	63659-18-7	C06849	Alkaloids			NWIUTZDMDHAVTP-UHFFFAOYSA-N	0.0234663	0.0221895	0.0247601	0.023472	0.0656177	0.0603783	0.0565996	0.0608652	1.3343	0.00016173	0.00230931	2.5931	1.37468
641	Sphingosine	3.87	level1			300.289	83.5	POS	C18H37NO2	HMDB0000252	123-78-4	C00319	Fatty acids	Sphingolipids	Sphingoid bases	WWUZIQQURGPMPG-KRWOKUGFSA-N	0.0450874	0.0480933	0.0451876	0.0461228	0.0200612	0.0188522	0.0193283	0.0194139	1.33967	1.3999e-05	0.000650057	0.420918	-1.24839
642	Arabinono-1,4-lactone	3.87	level1			147.03	74.5	NEG	C5H8O5	HMDB0001900	51532-86-6	C01114	Carbohydrates	Saccharides	Monosaccharides	CUOKHACJLGPRHD-YVZJFKFKSA-N	1.9473	2.20327	2.01241	2.05433	3.45737	3.44202	3.26177	3.38705	1.3239	0.00017765	0.00243345	1.64874	0.721366
643	N-p-Coumaroyloctopamine	3.87	level1			298.108	57.5	NEG	C17H17NO4		66648-45-1		Shikimates and Phenylpropanoids	Phenylpropanoids (C6-C3)	Cinnamic acid amides	VATOSFCFMOPAHX-XCVCLJGOSA-N	6.86663	7.15971	6.24171	6.75602	0.472658	0.412889	0.44556	0.443703	1.34115	0.0017683	0.0102007	0.0656752	-3.92851
644	8-hydroxy-3-methyl-isochroman-1-one	3.87	level1			177.055	34.2	NEG	C10H10O3		1200-93-7		Shikimates and Phenylpropanoids	Coumarins	Isocoumarins	KWILGNNWGSNMPA-UHFFFAOYSA-N	0.0479279	0.0603256	0.0506139	0.0529558	0.0172115	0.020224	0.0192673	0.0189009	1.32555	0.000919134	0.00662562	0.356919	-1.48633
645	2,4-dihydroxyheptadec-16-ynyl acetate	3.87	level1			309.242	31.9	POS	C19H34O4		24607-06-5		Fatty acids	Fatty acyls	Fatty alcohols	JAKAZHIACKJNNB-UHFFFAOYSA-N	0.0234173	0.0263099	0.0269123	0.0255465	0.17025	0.14664	0.13997	0.152286	1.33783	0.00474088	0.0198329	5.96114	2.57559
647	Bayogenin	3.86	level1			487.342	448.3	NEG	C30H48O5		6989-24-8		Terpenoids	Triterpenoids	Oleanane triterpenoids	RWNHLTKFBKYDOJ-JEERONPWSA-N	0.0294846	0.0491338	0.0245851	0.0344012	1.37455	2.03067	1.36112	1.58878	1.33132	0.01952	0.0544269	46.1839	5.52932
648	2-[4-[(2S,3R,4S,5S,6R)-3,4,5-trihydroxy-6-(hydroxymethyl)tetrahydropyran-2-yl]oxyphenyl]acetic acid	3.86	level1			313.093	209.6	NEG	C14H18O8				Shikimates and Phenylpropanoids			YHJWCNZGHBFVTB-RGCYKPLRSA-N	0.159306	0.157577	0.162127	0.15967	0.116109	0.111508	0.0974372	0.108351	1.2942	0.000883556	0.00645738	0.678595	-0.559377
649	(E)-2-(3,5-dihydroxy-4,4,10,13-tetramethyl-2,3,6,7,11,12,14,15,16,17-decahydro-1H-cyclopenta[a]phenanthren-17-yl)-6-hydroxy-5,6-dimethyl-hept-4-en-3-one	3.86	level1			471.347	51.4	NEG	C30H48O4				Terpenoids	Triterpenoids	Lanostane, Tirucallane and Euphane triterpenoids	BUHGQCWMNSHDMH-ISLYRVAYSA-N	0.0166351	0.00779718	0.00808514	0.0108391	0.0272179	0.0432944	0.0358072	0.0354398	1.22257	0.0108792	0.0356443	3.26961	1.70912
650	(10Z)-3a,10-dimethyl-1-prop-1-en-2-yl-2,3,4,5,6,7,8,9,12,12a-decahydro-1H-cyclopenta[11]annulene-6-carboxylic acid	3.86	level1			303.233	545.9	NEG	C20H32O2				Terpenoids	Diterpenoids	Dolabellane diterpenoids	FVDVQQJLECWRKH-NVNXTCNLSA-N	1.69171	2.02185	1.94915	1.88757	0.27921	0.292433	0.289962	0.287201	1.3404	0.00384602	0.0171582	0.152154	-2.71639
651	3-Epiursolic Acid	3.86	level1			455.353	542.8	NEG	C30H48O3				Terpenoids	Triterpenoids	Ursane and Taraxastane triterpenoids	WCGUUGGRBIKTOS-XHINXETDSA-N	0.0350789	0.0291573	0.0343247	0.0328536	0.550805	0.483911	0.548064	0.527593	1.34084	0.00182484	0.0104094	16.0589	4.0053
652	Cellobiose	3.86	level1			325.112	47.7	POS	C12H22O11	HMDB0000055	528-50-7	C00185	Carbohydrates	Saccharides	Disaccharides	GUBGYTABKSRVRQ-SINVPGNFSA-N	0.103112	0.10457	0.0893876	0.0990231	0.20741	0.209256	0.212781	0.209816	1.3307	2.6281e-05	0.000881332	2.11886	1.08329
653	6,7,4'-Trihydroxyisoflavone	3.86	level1			269.045	319.8	NEG	C15H10O5		17817-31-1	C14314	Shikimates and Phenylpropanoids	Isoflavonoids	Isoflavones	GYLUFQJZYAJQDI-UHFFFAOYSA-N	0.243286	0.207949	0.244742	0.231992	0.00265566	0.00276558	0.00115632	0.00219252	1.33243	0.00268745	0.0134702	0.00945084	-6.72534
654	(E)-8-hydroxy-2,6-dimethyl-oct-2-enoic acid	3.86	level1			185.118	346.3	NEG	C10H18O3				Fatty acids	Fatty Acids and Conjugates	Branched fatty acids	CDAJACJYYZHNJA-WEVVVXLNSA-N	0.180775	0.227909	0.209705	0.20613	0.123148	0.121085	0.120945	0.121726	1.30035	0.0251695	0.0657397	0.59053	-0.759918
656	N-Acetylalanine	3.86	level1			130.051	64.5	NEG	C5H9NO3	HMDB0255053	139146-66-0		Amino acids and Peptides	Small peptides	Dipeptides	KTHDTJVBEPMMGL-UHFFFAOYSA-N	0.107715	0.104316	0.0979097	0.103314	0.188973	0.221638	0.202216	0.204276	1.3257	0.000523259	0.00462719	1.97724	0.983488
657	Isovalerylcarnitine (Car(5:0))	3.86	level1			246.169	261.6	POS	C12H23NO4	HMDB0000688	31023-24-2	C20826	Fatty acids	Fatty esters	Fatty acyl carnitines	IGQBPDJNUXPEMT-SNVBAGLBSA-N	0.0128257	0.0102293	0.0126535	0.0119028	0.00780924	0.00812607	0.00835463	0.00809665	1.24607	0.0111442	0.0362716	0.680229	-0.555908
659	Dibutyl sebacate	3.86	level1			315.252	528.3	POS	C18H34O4	HMDB0041220	109-43-3	D03782	Fatty acids	Fatty esters	Wax monoesters	PYGXAGIECVVIOZ-UHFFFAOYSA-N	0.0343649	0.0325697	0.0316388	0.0328578	0.0457117	0.0365988	0.0463003	0.0428703	1.14616	0.036586	0.0868752	1.30472	0.383743
660	tributyl 2-acetoxypropane-1,2,3-tricarboxylate	3.86	level1			403.231	492.2	POS	C20H34O8		77-90-7		Fatty acids	Fatty esters	Wax monoesters	QZCLKYGREBVARF-UHFFFAOYSA-N	0.0139782	0.0118171	0.013815	0.0132034	0.0206835	0.0156937	0.0198632	0.0187468	1.15962	0.0307119	0.0761443	1.41984	0.505732
663	Sebacic acid	3.86	level1			201.113	353.6	NEG	C10H18O4	HMDB0000792	111-20-6	C08277	Fatty acids	Fatty Acids and Conjugates	Dicarboxylic acids	CXMXRPHRNRROMY-UHFFFAOYSA-N	0.317744	0.379313	0.330026	0.342361	0.654352	0.71675	0.622332	0.664478	1.3144	0.000654269	0.0053243	1.94087	0.956703
664	(1R,5R,8S)-2,3-dihydroxy-2,10,10-trimethyltricyclo[6.3.0.01,5]undec-6-ene-6-carboxylic acid	3.86	level1			265.144	338.3	NEG	C15H22O4				Terpenoids	Sesquiterpenoids	Pentalenane sesquiterpenoids	OMRLJECTMKPHFG-KWSCXFRRSA-N	0.0740611	0.112653	0.0554269	0.0807135	0.149408	0.147791	0.176285	0.157828	1.14986	0.0159629	0.0470201	1.95541	0.967469
665	3H-1,3-benzothiazol-2-one	3.86	level1			150.002	336.3	NEG	C7H5NOS		934-34-9		Alkaloids	Anthranilic acid alkaloids	Acridone alkaloids	YEDUAINPPJYDJZ-UHFFFAOYSA-N	0.210005	0.266651	0.250852	0.242503	0.307244	0.333034	0.280332	0.30687	1.07961	0.0472149	0.105459	1.26543	0.339626
667	Suberic acid	3.86	level1			173.082	292.7	NEG	C8H14O4	HMDB0000893	505-48-6	C08278	Fatty acids	Fatty Acids and Conjugates	Dicarboxylic acids	TYFQFVWCELRYAO-UHFFFAOYSA-N	0.929065	1.06282	0.964271	0.985387	1.34479	1.41672	1.31057	1.35736	1.28893	0.00185133	0.0105059	1.37749	0.462043
668	(2R,3S,4S,5R,6R)-2-[[(2S,3R,4R)-3,4-dihydroxy-4-(hydroxymethyl)tetrahydrofuran-2-yl]oxymethyl]-6-(2-phenylethoxy)tetrahydropyran-3,4,5-triol	3.86	level1			415.161	268.3	NEG	C19H28O10				Shikimates and Phenylpropanoids	Phenylethanoids (C6-C2)	Phenylethanoids	GZSQKOFXMZDKPV-DERWZFJFSA-N	0.425142	0.396425	0.392891	0.40482	0.0472951	0.0323097	0.0482363	0.0426137	1.33288	5.93457e-06	0.000435781	0.105266	-3.24789
669	4-[4-hydroxy-2,2,6-trimethyl-6-[(2S,3R,4S,5S,6R)-3,4,5-trihydroxy-6-(hydroxymethyl)tetrahydropyran-2-yl]oxy-cyclohexylidene]but-3-en-2-one	3.86	level1			385.187	256.1	NEG	C19H30O8				Terpenoids	Apocarotenoids	Megastigmanes	XTODSGVDHGMKSN-QOEUTKMXSA-N	0.0857875	0.105713	0.0951899	0.0955635	0.0495878	0.0532498	0.0483805	0.050406	1.31493	0.00160475	0.00956591	0.527461	-0.922863
670	(E)-N-[2-(4-Hydroxy-3-methoxyphenyl)ethyl]-3-[4-methoxy-3-[(2S,3R,4R,5S,6R)-3,4,5-trihydroxy-6-(hydroxymethyl)oxan-2-yl]oxyphenyl]prop-2-enamide	3.86	level1			506.201	252.5	POS	C25H31NO10		1408298-11-2		Shikimates and Phenylpropanoids	Phenylpropanoids (C6-C3)	Cinnamic acid amides	FYYYSHMTVVJBKO-PMTAATDPSA-N	0.0227816	0.018647	0.0224286	0.0212857	0.0130281	0.00968805	0.0114873	0.0114011	1.26881	0.00380069	0.017015	0.535624	-0.900707
671	(2R,3R,4S,5S,6R)-2-benzyloxy-6-(hydroxymethyl)tetrahydropyran-3,4,5-triol	3.86	level1			269.103	248.2	NEG	C13H18O6		878383		Shikimates and Phenylpropanoids			GKHCBYYBLTXYEV-UJPOAAIJSA-N	0.20131	0.221923	0.211402	0.211545	0.330925	0.324759	0.318166	0.324617	1.32862	8.58747e-05	0.00161811	1.5345	0.617773
672	2,3-Dihydroxy-4-methoxyacetophenone	3.86	level1			183.065	234.6	POS	C9H10O4		708-53-2		Shikimates and Phenylpropanoids			VCONERRCKOKCHE-UHFFFAOYSA-N	0.0260835	0.025804	0.0269609	0.0262828	0.0187462	0.0176208	0.0183897	0.0182522	1.33206	7.5652e-05	0.00151463	0.694456	-0.526044
673	(2R,3R,4R,5R,6S)-2-[[(2R,3S,4S,5R,6R)-6-benzyloxy-3,4,5-trihydroxy-tetrahydropyran-2-yl]methoxy]-6-methyl-tetrahydropyran-3,4,5-triol	3.86	level1			415.161	233.8	NEG	C19H28O10				Shikimates and Phenylpropanoids			SMUMBCREXHTKFN-VZOUQOBNSA-N	0.105101	0.121224	0.121346	0.11589	0.0392439	0.036182	0.0361831	0.037203	1.33651	0.000137714	0.00210601	0.321019	-1.63927
674	(2S,3R,4S,5S,6R)-2-[4-(2-nitroethyl)phenoxy]-6-[[(2S,3R,4S,5R)-3,4,5-trihydroxytetrahydropyran-2-yl]oxymethyl]tetrahydropyran-3,4,5-triol	3.86	level1			442.136	224.5	NEG	C19H27NO12		649758-25-8		Shikimates and Phenylpropanoids	Phenylethanoids (C6-C2)	Phenylethanoids	ZHVLPKFAODFQST-BMVMOQKNSA-N	0.0281205	0.0314242	0.0313566	0.0303004	0.0982208	0.101675	0.0958238	0.0985731	1.33888	4.5528e-06	0.000393398	3.25319	1.70186
675	2-Hydroxyhexanedioic acid	3.86	level1			143.035	96.4	NEG	C6H10O5	HMDB0000321	18294-85-4	C02360	Fatty acids	Fatty Acids and Conjugates	Dicarboxylic acids	OTTXIFWBPRRYOG-UHFFFAOYSA-N	0.0911062	0.0963731	0.0882032	0.0918941	0.118613	0.116324	0.107541	0.114159	1.26093	0.00575518	0.0227016	1.24229	0.313003
677	3-Ureidopropionic acid	3.86	level1			131.046	54	NEG	C4H8N2O3	HMDB0000026	462-88-4	C02642	Amino acids and Peptides	Small peptides	Aminoacids	JSJWCHRYRHKBBW-UHFFFAOYSA-N	0.23181	0.229629	0.24822	0.236553	0.100192	0.0828445	0.0886847	0.0905737	1.33158	4.72977e-05	0.00118308	0.38289	-1.385
678	Lysine	3.86	level1			147.112	45.1	POS	C6H14N2O2	HMDB0000182	56-87-1	C00047	Amino acids and Peptides	Small peptides	Aminoacids	KDXKERNSBIXSRK-YFKPBYRVSA-N	0.100839	0.0662679	0.0876313	0.0849126	0.0374082	0.0341272	0.0282904	0.0332753	1.27748	0.00772719	0.0279336	0.391877	-1.35153
679	LPC(16:1)	3.86	level1			494.322	494.6	POS	C24H48NO7P							JBFBGNHYRPBNML-WHIOSMTNSA-N	0.00769662	0.00585224	0.00629507	0.00661464	0.00432459	0.00379825	0.00405678	0.00405987	1.25548	0.0113936	0.0368539	0.613771	-0.704229
681	Citramalic acid	3.86	level1			147.03	409.7	NEG	C5H8O5	HMDB0000426	597-44-4	C00815	Fatty acids	Fatty Acids and Conjugates	Hydroxy fatty acids	XFTRTWQBIOMVPK-UHFFFAOYSA-N	0.286933	0.27867	0.289579	0.285061	0.176266	0.17832	0.183397	0.179328	1.339	1.11117e-05	0.000590864	0.629087	-0.668669
682	Ala-Gln	3.86	level1			216.099	359.9	NEG	C8H15N3O4	HMDB0028685	39537-23-0		Amino acids and Peptides	Small peptides	Dipeptides	HJCMDXDYPOUFDY-WHFBIAKZSA-N	0.0154156	0.0153212	0.0157957	0.0155108	0.0211002	0.0233522	0.0230229	0.0224917	1.32098	0.000623403	0.00516064	1.45007	0.53612
684	Acetylcarnitine (Car(2:0))	3.86	level1			204.123	324.2	POS	C9H17NO4	HMDB0000201	3040-38-8	C02571	Fatty acids	Fatty esters	Fatty acyl carnitines	RDHQFKQIGNGIED-MRVPVSSYSA-N	0.174486	0.183056	0.180836	0.17946	0.109861	0.112264	0.106754	0.109626	1.3382	2.08e-05	0.000784336	0.610869	-0.711064
686	Propionylcarnitine (Car(3:0))	3.86	level1			218.138	299.4	POS	C10H19NO4	HMDB0000824	17298-37-2	C03017	Fatty acids	Fatty esters	Fatty acyl carnitines	UFAHZIUFPNSHSL-UHFFFAOYSA-N	0.00990388	0.00929632	0.00999216	0.00973079	0.00423218	0.0036863	0.00422745	0.00404864	1.333	3.68361e-05	0.0010407	0.416065	-1.26512
687	Tyrosylalanine	3.86	level1			251.103	266.3	NEG	C12H16N2O4	HMDB0029098	730-08-5		Amino acids and Peptides	Small peptides	Dipeptides	NLKUJNGEGZDXGO-UHFFFAOYSA-N	0.0277139	0.0254787	0.0281851	0.0271259	0.0546374	0.0525191	0.0582981	0.0551515	1.33267	0.000118701	0.00193648	2.03317	1.02373
688	coumaroyl(3-OMe)(-3)Glc(a1-2b)L-Fruf	3.86	level1			517.155	257	NEG	C22H30O14				Shikimates and Phenylpropanoids			AVZDWQPNGQYBPS-OVONMYPQSA-N	0.0103772	0.00658295	0.00945497	0.00880503	0.0223001	0.0200257	0.0258369	0.0227209	1.27705	0.00241686	0.01255	2.58045	1.36762
689	Ethambutol (dihydrochloride)	3.86	level1			187.18	249.5	POS	C10H24N2O2	HMDB0014474	74-55-5	C06984	Alkaloids	Peptide alkaloids	Simple amide alkaloids	AEUTYOVWOVBAKS-UWVGGRQHSA-N	0.0560767	0.0503552	0.0536207	0.0533509	0.028454	0.0264107	0.0278208	0.0275618	1.33286	0.00012727	0.00201548	0.516614	-0.952842
691	2-Linoleoyl-1-palmitoyl-sn-glycero-3-phosphoethanolamine	3.86	level1			714.506	169.2	NEG	C39H74NO8P	HMDB0008928	26662-95-3		Fatty acids	Glycerophospholipids	Glycerophosphoethanolamines	HBZNVZIRJWODIB-NHCUFCNUSA-N	2.23872	2.474	2.41362	2.37545	1.73825	1.97139	1.77965	1.82976	1.25928	0.00561589	0.0223132	0.770281	-0.376543
692	2'-O-Methyladenosine	3.86	level1			282.119	98.7	POS	C11H15N5O4	HMDB0004326	2140-79-6		Carbohydrates	Nucleosides	Purine nucleos(t)ides	FPUGCISOLXNPPC-INWNYVOZSA-N	0.226694	0.238798	0.241035	0.235509	0.404816	0.359716	0.394435	0.386322	1.32465	0.000462956	0.00427976	1.64037	0.714022
694	6-(Dimethylamino)purine	3.86	level1			164.092	63.9	POS	C7H9N5	HMDB0000473	938-55-6		Alkaloids	Pseudoalkaloids	Purine alkaloids	BVIAOQMSVZHOJM-UHFFFAOYSA-N	0.00499337	0.00662022	0.00628866	0.00596742	0.0030355	0.00300325	0.00246943	0.00283606	1.28841	0.00408506	0.0178848	0.475257	-1.07322
696	Dodecyl gallate	3.86	level1			337.205	25.1	NEG	C19H30O5	HMDB0038720	1166-52-5		Shikimates and Phenylpropanoids	Phenolic acids (C6-C1)	Shikimic acids and derivatives	RPWFJAMTCNSJKK-UHFFFAOYSA-N	0.983929	1.20819	0.738156	0.976757	1.45523	1.51768	1.61388	1.52893	1.13837	0.0182779	0.0518859	1.56531	0.646448
697	2-amino-5-[(1-carboxy-2-phenyl-ethyl)amino]-5-oxo-pentanoic acid	3.86	level1			295.128	365.8	POS	C14H18N2O5	HMDB0000594	7432-24-8		Amino acids and Peptides	Small peptides	Dipeptides	XHHOHZPNYFQJKL-UHFFFAOYSA-N	0.00815183	0.00702027	0.00987039	0.00834749	0.0153065	0.0157543	0.0161904	0.0157504	1.28201	0.00103239	0.00712561	1.88684	0.915971
698	1,10-dihydroxy-9-(hydroxymethyl)-1,2,6a,6b,9,12a-hexamethyl-2,3,4,5,6,6a,7,8,8a,10,11,12,13,14b-tetradecahydropicene-4a-carboxylic acid	3.85	level1			487.342	448.3	NEG	C30H48O5				Terpenoids	Triterpenoids	Ursane and Taraxastane triterpenoids	YLHQFGOOMKJFLP-UHFFFAOYSA-N	0.0294846	0.0491338	0.0245851	0.0344012	1.37455	2.03067	1.36112	1.58878	1.33132	0.01952	0.0544269	46.1839	5.52932
700	Caffeic acid	3.85	level1			179.035	263.4	NEG	C9H8O4	HMDB0003501	501-16-6	C01197	Shikimates and Phenylpropanoids	Phenylpropanoids (C6-C3)	Cinnamic acids and derivatives	QAIPRVGONGVQAS-DUXPYHPUSA-N	0.174486	0.155348	0.225252	0.185029	0.0439934	0.0449314	0.0505876	0.0465042	1.32314	0.0210678	0.0575427	0.251335	-1.99232
701	(3S,6R,9S,12R,15S,18R)-3,9,15-tribenzyl-6,12,18-triisopropyl-4,10,16-trimethyl-1,7,13-trioxa-4,10,16-triazacyclooctadecane-2,5,8,11,14,17-hexone	3.85	level1			784.414	491.4	POS	C45H57N3O9				Amino acids and Peptides	Oligopeptides	Cyclic peptides	GYSCAQFHASJXRS-FFCOJMSVSA-N	0.000246028	0.000401854	0.000464803	0.000370895	2.72839e-06	2.74836e-06	2.62293e-06	2.69989e-06	1.33868	0.0298013	0.0744697	0.0072794	-7.10196
702	Citric acid	3.85	level1			191.019	61.1	NEG	C6H8O7	HMDB0000094	77-92-9	C00158	Fatty acids	Fatty Acids and Conjugates	Hydroxy fatty acids	KRKNYBCHXYNGOX-UHFFFAOYSA-N	53.6095	59.3639	50.843	54.6055	61.6708	64.0612	66.795	64.1757	1.13723	0.0303717	0.0755262	1.17526	0.232981
703	2-Oxo-4-phenylbutyric acid	3.85	level1			177.055	34.2	NEG	C10H10O3		710-11-2	C20327	Shikimates and Phenylpropanoids			PPKAIMDMNWBOKN-UHFFFAOYSA-N	0.0479279	0.0603256	0.0506139	0.0529558	0.0172115	0.020224	0.0192673	0.0189009	1.32555	0.000919134	0.00662562	0.356919	-1.48633
705	(3aR,5S,7S,8R,8aS,9aR)-7,8-dihydroxy-5,8a-dimethyl-1-methylene-4,5,5a,6,7,8,9,9a-octahydro-3aH-azuleno[6,5-b]furan-2-one	3.85	level1			265.144	338.3	NEG	C15H22O4				Terpenoids	Sesquiterpenoids	Pseudoguaiane sesquiterpenoids	ZFCRHGITKWEXDY-ZJYMWTMGSA-N	0.0740611	0.112653	0.0554269	0.0807135	0.149408	0.147791	0.176285	0.157828	1.14986	0.0159629	0.0470201	1.95541	0.967469
706	4-Hydroxycinnamic acid	3.85	level1			163.04	294.1	NEG	C9H8O3	HMDB0002035	7400-08-0	C00811	Shikimates and Phenylpropanoids	Phenylpropanoids (C6-C3)	Cinnamic acids and derivatives	NGSWKAQJJWESNS-ZZXKWVIFSA-N	0.0745474	0.0670613	0.0760695	0.0725594	0.0137712	0.0177723	0.0178287	0.0164574	1.33205	5.41894e-05	0.00127117	0.226813	-2.14043
707	Tropolone	3.85	level1			121.029	320.8	NEG	C7H6O2				Shikimates and Phenylpropanoids			MDYOLVRUBBJPFM-UHFFFAOYSA-N	0.930546	1.06659	1.02865	1.0086	2.27275	2.40045	2.16214	2.27845	1.33149	9.15895e-05	0.00167456	2.25903	1.1757
712	[(5E)-3,4-dihydroxy-10-oxo-2-propyl-2,3,4,7,8,9-hexahydrooxecin-9-yl] (2E,4E)-hexa-2,4-dienoate	3.85	level1			337.166	387.8	NEG	C18H26O6		152985-39-2	C08503	Polyketides	Macrolides	Macrolide lactones	TXPRZPDVUZCNLB-YECGNMMBSA-N	0.0213939	0.0280173	0.0254362	0.0249491	0.0817962	0.0834675	0.0857365	0.0836667	1.33021	1.25918e-05	0.000623276	3.35349	1.74566
714	10-Hydroxydecanoic acid	3.85	level1			187.134	359.1	NEG	C10H20O3	HMDB0244272	1679-53-4	C02774	Fatty acids	Fatty Acids and Conjugates	Hydroxy fatty acids	YJCJVMMDTBEITC-UHFFFAOYSA-N	0.0546813	0.0450326	0.0384905	0.0460681	0.0204325	0.0265951	0.0213443	0.0227906	1.25747	0.0101629	0.0339265	0.494716	-1.01533
715	(2E,5E)-3,5,7-trimethylocta-2,5-dienedioic acid	3.85	level1			211.097	347.6	NEG	C11H16O4				Fatty acids	Fatty Acids and Conjugates	Branched fatty acids	WLVNOJMYBIEIPJ-KQQUZDAGSA-N	0.0310828	0.0328833	0.0306289	0.0315317	0.0276492	0.0289251	0.0259703	0.0275149	1.17436	0.0216235	0.0586515	0.872611	-0.19659
721	[(2R,3S,4S,5R,6S)-6-[[(3S,4R,4aR)-4-ethenyl-4a-hydroxy-8-oxo-3,4,5,6-tetrahydropyrano[3,4-c]pyran-3-yl]oxy]-3,4,5-trihydroxyoxan-2-yl]methyl acetate	3.85	level1			415.125	264.5	NEG	C18H24O11				Terpenoids	Monoterpenoids	Secoiridoid monoterpenoids	IQWFMLIFUZTUPY-WURMDRQBSA-N	0.0327047	0.0367806	0.031115	0.0335334	0.0457159	0.0650241	0.0483084	0.0530161	1.18164	0.0361615	0.0861089	1.58099	0.660831
722	(2R,3S,4S,5R,6S)-2-(hydroxymethyl)-6-[4-[[(3S,4S,5R)-4-(hydroxymethyl)-5-[3-methoxy-4-[(2S,3R,4S,5S,6R)-3,4,5-trihydroxy-6-(hydroxymethyl)tetrahydropyran-2-yl]oxy-phenyl]tetrahydrofuran-3-yl]methyl]-2-methoxy-phenoxy]tetrahydropyran-3,4,5-triol	3.85	level1			683.255	241.1	NEG	C32H44O16				Shikimates and Phenylpropanoids	Lignans	Furanoid lignans	PBLWZMSRSJTRHJ-CTZSIISJSA-N	0.151936	0.13988	0.156005	0.149274	0.265373	0.236599	0.240996	0.247656	1.31913	0.000640017	0.00524684	1.65907	0.730376
723	(2E,4E)-5-[8-hydroxy-1,5-dimethyl-3-[3,4,5-trihydroxy-6-(hydroxymethyl)tetrahydropyran-2-yl]oxy-6-oxabicyclo[3.2.1]octan-8-yl]-3-methyl-penta-2,4-dienoic acid	3.85	level1			443.192	230.5	NEG	C21H32O10				Terpenoids	Apocarotenoids	Apocarotenoids(ε-)	UHHVHDDICOEBTQ-LJIKRCSCSA-N	1.21418	1.44629	1.41502	1.3585	2.43506	2.44018	2.27452	2.38325	1.31233	0.000351375	0.00359397	1.75433	0.810922
724	1,7-Dimethylxanthine	3.85	level1			179.056	213.1	NEG	C7H8N4O2	HMDB0001860	611-59-6	C13747	Alkaloids	Pseudoalkaloids	Purine alkaloids	QUNWUDVFRNGTCO-UHFFFAOYSA-N	0.185446	0.179934	0.204911	0.190097	0.239848	0.207838	0.23358	0.227089	1.1186	0.0404361	0.0936778	1.19459	0.256521
725	N-Feruloylputrescine	3.85	level1			265.154	211.1	POS	C14H20N2O3		501-13-3|91000-11-2	C10497	Alkaloids	Ornithine alkaloids	Polyamines	SFUVCMKSYKHYLD-FNORWQNLSA-N	0.0896487	0.0795946	0.0856858	0.0849763	0.158857	0.155598	0.150431	0.154962	1.33236	5.20352e-05	0.00124417	1.82359	0.866783
726	Phloroglucinol	3.85	level1			127.039	95.2	POS	C6H6O3	HMDB0013675	108-73-6	C02183	Polyketides	Phloroglucinols	Oligomeric phloroglucinols (phlorotannins)	QCDYQQDYXPDABM-UHFFFAOYSA-N	0.0610646	0.0632341	0.0603315	0.0615434	0.107076	0.106588	0.0910601	0.101575	1.31075	0.00168292	0.00987481	1.65046	0.722864
727	Phosphate	3.85	level1			96.9696	493.1	NEG	H3O4P	HMDB0001429	7664-38-2	C00009	Carbohydrates			NBIIXXVUZAFLBC-UHFFFAOYSA-N	0.112555	0.100763	0.110797	0.108038	0.468012	0.422737	0.463981	0.451576	1.33977	2.11126e-05	0.000789533	4.17978	2.06343
729	N-Acetyl-arginine	3.85	level1			217.129	388.4	POS	C8H16N4O3	HMDB0004620	155-84-0		Amino acids and Peptides	Small peptides	Dipeptides	SNEIUMQYRCDYCH-LURJTMIESA-N	0.066283	0.0653758	0.0656736	0.0657775	0.0398391	0.0382799	0.0400581	0.0393923	1.33995	1.82512e-06	0.00027562	0.598873	-0.739679
730	Normetanephrine	3.85	level1			166.086	242.6	POS	C9H13NO3	HMDB0000819	97-31-4	C05589	Alkaloids	Tyrosine alkaloids	Phenylethylamines	YNYAYWLBAHXHLL-UHFFFAOYSA-N	0.230851	0.185825	0.222384	0.21302	0.538622	0.496407	0.556262	0.53043	1.32542	0.000146519	0.00218404	2.49005	1.31617
731	Tryptamine	3.85	level1			161.107	216.1	POS	C10H12N2	HMDB0000303	61-54-1	C00398	Alkaloids	Tryptophan alkaloids	Simple indole alkaloids	APJYDQYYACXCRM-UHFFFAOYSA-N	0.017744	0.0151232	0.0106564	0.0145078	0.0233325	0.0224615	0.0240959	0.0232967	1.14632	0.0143607	0.0435243	1.6058	0.683291
732	Nicotine	3.85	level1			163.123	67.8	POS	C10H14N2	HMDB0001934	54-11-5	C00745	Alkaloids	Nicotinic acid alkaloids	Pyridine alkaloids	SNICXCGAKADSCV-JTQLQIEISA-N	0.0670923	0.0705188	0.0686095	0.0687402	0.0473487	0.0444534	0.0524897	0.0480973	1.29238	0.00126639	0.0081693	0.699697	-0.515199
733	Formylanthranilic acid	3.85	level1			164.035	62	NEG	C8H7NO3	HMDB0004089	3342-77-6	C05653	Alkaloids	Anthranilic acid alkaloids	Anthranillic acid derivatives	LLLPDUXGHXIXIW-UHFFFAOYSA-N	0.0538698	0.0601117	0.0552	0.0563938	0.0370366	0.0422258	0.0370884	0.0387836	1.28996	0.00234789	0.0123046	0.687728	-0.540091
734	1,3-Dimethylpyrazole	3.85	level1			97.0758	25.6	POS	C5H8N2		694-48-4		Alkaloids			NODLZCJDRXTSJO-UHFFFAOYSA-N	0.00411009	0.00401418	0.00359326	0.00390584	0.00526253	0.00543649	0.0052983	0.00533244	1.29598	0.00103906	0.00715303	1.36525	0.449162
736	17-ODYA	3.84	level1			279.232	551.5	NEG	C18H32O2	HMDB0244776	34450-18-5					DZIILFGADWDKMF-UHFFFAOYSA-N	52.9432	55.2147	53.6059	53.9213	47.5393	43.2211	44.9257	45.2287	1.26908	0.00365738	0.0165681	0.838792	-0.253616
737	methyl 2-hydroxy-3-[(2S,3R,4S,5S,6R)-3,4,5-trihydroxy-6-(hydroxymethyl)tetrahydropyran-2-yl]oxy-benzoate	3.84	level1			329.088	233.8	NEG	C14H18O9				Shikimates and Phenylpropanoids	Phenolic acids (C6-C1)	Simple phenolic acids	VSTYNZNDJYVPKL-RRZLQCMWSA-N	0.0531495	0.0584432	0.0619579	0.0578502	0.0783276	0.0772354	0.0697183	0.0750938	1.2263	0.00981503	0.033086	1.29807	0.376372
739	3-Epioleanolic acid	3.84	level1			455.353	542.8	NEG	C30H48O3	HMDB0036962	25499-90-5		Terpenoids	Triterpenoids	Oleanane triterpenoids	MIJYXULNPSFWEK-KDQGZELNSA-N	0.0350789	0.0291573	0.0343247	0.0328536	0.550805	0.483911	0.548064	0.527593	1.34084	0.00182484	0.0104094	16.0589	4.0053
740	(1R,2S,6S,9S,10S,11R,14S,15S,18S,20R,23R,24S)-10,20-dihydroxy-6,10,23-trimethyl-4-azahexacyclo[12.11.0.02,11.04,9.015,24.018,23]pentacosan-17-one	3.84	level1			412.32	182.9	POS	C27H43NO3		157478-01-8		Alkaloids	Pseudoalkaloids	Steroidal alkaloids	IQDIERHFZVCNRZ-MWNPEGAOSA-N	0.0175191	0.0178796	0.0172553	0.0175513	0.0249511	0.0237429	0.0227445	0.0238128	1.31953	0.000701376	0.00556215	1.35675	0.440159
741	2-hydroxy-3-methoxy-benzaldehyde	3.84	level1			151.04	275.7	NEG	C8H8O3		148-53-8		Shikimates and Phenylpropanoids	Phenylpropanoids (C6-C3)	Cinnamic acids and derivatives	JJVNINGBHGBWJH-UHFFFAOYSA-N	0.371319	0.376835	0.377432	0.375196	0.269258	0.267289	0.311141	0.282563	1.26816	0.0213809	0.0581671	0.753108	-0.409071
742	(2S,3S,4S,5R,6R)-6-[[(3S,4S,6aR,6bS,8aR,9R,12aS,14bR)-9-hydroxy-4-(hydroxymethyl)-4,6a,6b,8a,11,11,14b-heptamethyl-1,2,3,4a,5,6,7,8,9,10,12,12a,14,14a-tetradecahydropicen-3-yl]oxy]-5-[(2S,3R,4S,5R,6R)-4,5-dihydroxy-6-(hydroxymethyl)-3-[(2S,3R,4R,5R,6S)-3,4,5-trihydroxy-6-methyl-tetrahydropyran-2-yl]oxy-tetrahydropyran-2-yl]oxy-3,4-dihydroxy-tetrahydropyran-2-carboxylic acid	3.84	level1			941.51	415.9	NEG	C48H78O18		51330-27-9		Terpenoids	Triterpenoids	Oleanane triterpenoids	PTDAHAWQAGSZDD-VJQGOKKYSA-N	0.000425327	0.00106649	0.00161387	0.00103523	0.01121	0.0116196	0.00682567	0.00988512	1.26016	0.0049003	0.0202901	9.54873	3.25531
743	2-indolecarboxylic-acid	3.84	level1			160.04	316.6	NEG	C9H7NO2	HMDB0002285	1477-50-5		Alkaloids	Tryptophan alkaloids	Simple indole alkaloids	HCUARRIEZVDMPT-UHFFFAOYSA-N	0.0241467	0.0255273	0.0317284	0.0271341	0.0160038	0.0169324	0.0181234	0.0170199	1.25041	0.0137467	0.0422023	0.62725	-0.672888
744	7,8-dimethoxychromen-2-one	3.84	level1			207.064	284	POS	C11H10O4		2445-80-9		Shikimates and Phenylpropanoids	Coumarins	Simple coumarins	CHBBSMUTOCUVDW-UHFFFAOYSA-N	0.0980199	0.0868784	0.0831209	0.0893397	0.0238051	0.0251585	0.0217364	0.0235667	1.33571	0.000136959	0.00210018	0.263787	-1.92255
746	2-(2-phenylethoxy)-6-[(3,4,5-trihydroxytetrahydropyran-2-yl)oxymethyl]tetrahydropyran-3,4,5-triol	3.84	level1			415.161	268.3	NEG	C19H28O10		129932-48-5		Shikimates and Phenylpropanoids	Phenylethanoids (C6-C2)	Phenylethanoids	ZRGXCWYRIBRSQA-UHFFFAOYSA-N	0.425142	0.396425	0.392891	0.40482	0.0472951	0.0323097	0.0482363	0.0426137	1.33288	5.93457e-06	0.000435781	0.105266	-3.24789
747	(Z)-5,8,11-trihydroxyoctadec-9-enoic acid	3.84	level1			329.233	392	NEG	C18H34O5				Fatty acids	Octadecanoids	Other Octadecanoids	FITAKYVPWCVTII-QBFSEMIESA-N	28.9769	32.2528	29.8668	30.3655	63.5623	62.7299	60.8272	62.3731	1.33601	1.46946e-05	0.000663291	2.05408	1.03849
749	PC(31:1)	3.84	level1			700.533	608.3	POS	C39H76NO8P							NLIPNXKQJMHIRD-ROOGKDHUSA-N	0.0268314	0.0277539	0.0288346	0.0278066	0.0522981	0.0471669	0.0427343	0.0473998	1.30732	0.00226414	0.0120051	1.70462	0.76945
750	PC(38:7)	3.84	level1			804.55	598.2	POS	C46H78NO8P							KVZGNJNSFSUTHN-WJPDOSEWSA-N	0.0189764	0.0195111	0.0176577	0.0187151	0.00338934	0.00347388	0.00451258	0.00379193	1.33286	2.24698e-05	0.000817476	0.202614	-2.3032
751	2-Hydroxystearic acid	3.84	level1			299.259	567.2	NEG	C18H36O3	HMDB0062549	26531-80-6	C03045	Fatty acids	Fatty Acids and Conjugates	Hydroxy fatty acids	KIHBGTRZFAVZRV-UHFFFAOYSA-N	0.23117	0.235228	0.264516	0.243638	0.132944	0.112506	0.13868	0.128043	1.30611	0.000928999	0.00666928	0.525549	-0.928104
755	Platycodigenin	3.84	level1			519.332	416.4	NEG	C30H48O7		22327-82-8		Terpenoids	Triterpenoids	Oleanane triterpenoids	APTNOIWSCDBIAS-UHFFFAOYSA-N	0.00358945	0.0040043	0.00375877	0.00378417	0.0249788	0.0210614	0.0269734	0.0243379	1.3375	0.00685106	0.0256445	6.4315	2.68516
757	methyl (E)-3-(3-hydroxy-4-methoxy-phenyl)prop-2-enoate	3.84	level1			207.066	342.9	NEG	C11H12O4		16980-82-8		Shikimates and Phenylpropanoids	Phenylpropanoids (C6-C3)	Cinnamic acids and derivatives	JTLOUXXZZFFBBW-GQCTYLIASA-N	0.0274262	0.0272693	0.0263266	0.0270074	0.0352881	0.0407538	0.0386504	0.0382308	1.30054	0.00232284	0.0122187	1.41557	0.501381
758	(6E,8E)-3-hydroxy-4,9-dimethyl-10-oxo-10-[(2S,3R,4S,5S,6R)-3,4,5-trihydroxy-6-(hydroxymethyl)tetrahydropyran-2-yl]oxy-deca-6,8-dienoic acid	3.84	level1			403.161	271.1	NEG	C18H28O10							JWAGJGCOOSEMAU-CGSVZCSKSA-N	0.073129	0.0582383	0.0551554	0.0621742	0.0411939	0.0455206	0.0365535	0.0410894	1.18829	0.0262153	0.0677219	0.660875	-0.597552
760	2-[4-[4-[hydroxy-(4-hydroxy-3-methoxy-phenyl)methyl]-3-(hydroxymethyl)tetrahydrofuran-2-yl]-2-methoxy-phenoxy]-6-(hydroxymethyl)tetrahydropyran-3,4,5-triol	3.84	level1			537.197	246.5	NEG	C26H34O12				Shikimates and Phenylpropanoids	Lignans	Furanoid lignans	AWTYKUNFPBFFHC-UHFFFAOYSA-N	0.0230107	0.0235706	0.0204379	0.0223397	0.0341994	0.0336814	0.0349197	0.0342668	1.31395	0.000316795	0.00338272	1.5339	0.617202
763	Choline	3.84	level1			104.106	43.7	POS	C5H14NO	HMDB0000097	62-49-7	C00114				OEYIOHPDSNJKLS-UHFFFAOYSA-N	8.94123	8.81194	8.96052	8.90456	13.3807	13.0677	12.298	12.9155	1.32998	0.00556299	0.0221586	1.45043	0.536484
765	Maltose	3.84	level1			365.104	418.4	POS	C12H22O11	HMDB0000163	69-79-4	C00208	Carbohydrates	Saccharides	Disaccharides	GUBGYTABKSRVRQ-DKBJLJRDSA-N	0.0849567	0.0839778	0.0821076	0.0836807	0.100343	0.104526	0.103135	0.102668	1.327	0.00021677	0.00273229	1.22691	0.295024
766	4-Guanidinobutyric acid	3.84	level1			146.092	379.8	POS	C5H11N3O2	HMDB0003464	463-00-3	C01035	Amino acids and Peptides	Small peptides	Aminoacids	TUHVEAJXIMEOSA-UHFFFAOYSA-N	0.283097	0.249875	0.275487	0.269486	0.141541	0.156704	0.160132	0.152792	1.31884	0.000541623	0.00472914	0.566977	-0.818639
768	1-Palmitoyllysophosphatidate	3.84	level1			409.236	302.1	NEG	C19H39O7P	HMDB0007853	22002-85-3	C04036	Fatty acids	Glycerophospholipids	Glycerophosphates	YNDYKPRNFWPPFU-UHFFFAOYSA-N	0.0113482	0.00960888	0.0100872	0.0103481	0.0201318	0.0198161	0.0205253	0.0201577	1.32826	6.14213e-05	0.00135559	1.94797	0.961969
771	[5-hydroxy-6-[2-(4-hydroxy-3-methoxy-phenyl)ethoxy]-2-(hydroxymethyl)-4-(3,4,5-trihydroxy-6-methyl-tetrahydropyran-2-yl)oxy-tetrahydropyran-3-yl] (E)-3-(4-hydroxy-3-methoxy-phenyl)prop-2-enoate	3.84	level1			653.247	40.8	POS	C31H40O15				Shikimates and Phenylpropanoids	Phenylpropanoids (C6-C3)	Cinnamic acids and derivatives	RLGRBYHBNWLGER-RMKNXTFCSA-N	0.0499152	0.0423576	0.0584398	0.0502376	0.114331	0.0891458	0.10802	0.103832	1.27618	0.00379657	0.0170044	2.06682	1.04741
775	Chiro-Inositol	3.83	level1			179.056	409	NEG	C6H12O6		643-12-9	C00137|C06153|C06151|C06152|C19891|D08079	Carbohydrates	Polyols	Cyclitols	CDAISMWEOUEBRE-LKPKBOIGSA-N	2.61931	2.72284	2.76682	2.70299	3.30407	3.22338	3.20835	3.24527	1.31472	0.00050936	0.00455543	1.20062	0.263782
776	(E)-6-(1,3-dihydroxy-4,4,8,10,14-pentamethyl-2,3,5,6,7,9,11,15,16,17-decahydro-1H-cyclopenta[a]phenanthren-17-yl)-2-methyl-hept-2-enoic acid	3.83	level1			471.347	495.8	NEG	C30H48O4				Terpenoids	Triterpenoids	Dammarane and Protostane triterpenoids	YQXLCRFLNIXKQV-VXLYETTFSA-N	0.0239093	0.0242926	0.0236856	0.0239625	0.281988	0.235568	0.300507	0.272688	1.3401	0.00597269	0.0232941	11.3798	3.5084
777	NAE(18:3(6Z,9Z,12Z))	3.83	level1			322.273	501.5	POS	C20H35NO2	HMDB0013624	150314-37-7		Fatty acids	Fatty amides	N-acyl ethanolamines (endocannabinoids)	KRDUNUMTOBLEPM-QNEBEIHSSA-N	0.0189405	0.0165729	0.0199969	0.0185034	0.00896685	0.00748039	0.00931456	0.00858727	1.3082	0.00102146	0.00707842	0.464091	-1.10752
778	(4S)-4-hydroxy-3,5,5-trimethyl-4-[(E,3R)-3-[(2R,3R,4S,5S,6R)-3,4,5-trihydroxy-6-(hydroxymethyl)tetrahydropyran-2-yl]oxybut-1-enyl]cyclohex-2-en-1-one	3.83	level1			385.187	256.1	NEG	C19H30O8		54835-70-0		Terpenoids	Apocarotenoids	Megastigmanes	SWYRVCGNMNAFEK-MHXFFUGFSA-N	0.0857875	0.105713	0.0951899	0.0955635	0.0495878	0.0532498	0.0483805	0.050406	1.31493	0.00160475	0.00956591	0.527461	-0.922863
779	Theophylline	3.83	level1			179.056	213.1	NEG	C7H8N4O2	HMDB0001889	58-55-9	C07130	Alkaloids	Pseudoalkaloids	Purine alkaloids	ZFXYFBGIUFBOJW-UHFFFAOYSA-N	0.185446	0.179934	0.204911	0.190097	0.239848	0.207838	0.23358	0.227089	1.1186	0.0404361	0.0936778	1.19459	0.256521
780	(Z)-6,9,10-trihydroxyoctadec-7-enoic acid	3.83	level1			329.233	392	NEG	C18H34O5				Fatty acids	Octadecanoids	Other Octadecanoids	KFPLVZLISLBBSJ-YPKPFQOOSA-N	28.9769	32.2528	29.8668	30.3655	63.5623	62.7299	60.8272	62.3731	1.33601	1.46946e-05	0.000663291	2.05408	1.03849
781	3,5-Dimethoxycinnamic acid	3.83	level1			207.066	342.9	NEG	C11H12O4		16909-11-8		Shikimates and Phenylpropanoids	Phenylpropanoids (C6-C3)	Cinnamic acids and derivatives	VLSRUFWCGBMYDJ-ONEGZZNKSA-N	0.0274262	0.0272693	0.0263266	0.0270074	0.0352881	0.0407538	0.0386504	0.0382308	1.30054	0.00232284	0.0122187	1.41557	0.501381
782	Methyl caffeate	3.83	level1			193.05	292.3	NEG	C10H10O4		3843-74-1	C10477	Shikimates and Phenylpropanoids	Phenylpropanoids (C6-C3)	Cinnamic acids and derivatives	OCNYGKNIVPVPPX-HWKANZROSA-N	1.01131	0.990672	0.961862	0.987948	0.773401	0.763748	0.731162	0.756104	1.32341	0.000270134	0.0030755	0.765327	-0.385851
786	all-trans-5,6-Epoxyretinoic acid	3.83	level1			315.196	483.1	NEG	C20H28O3	HMDB0012451	13100-69-1	C16680	Terpenoids	Apocarotenoids	Apocarotenoids (β-)	KEEHJLBAOLGBJZ-WEDZBJJJSA-N	0.0160206	0.0182293	0.0193935	0.0178811	0.00328878	0.00666879	0.00370454	0.00455404	1.28019	0.000784233	0.00597134	0.254684	-1.97322
787	Trolox	3.83	level1			249.113	339	NEG	C14H18O4	HMDB0038804	53188-07-1		Terpenoids	Meroterpenoids	Prenyl quinone meroterpenoids	GLEVLJDDWXEYCO-UHFFFAOYSA-N	0.0129419	0.0187859	0.0256368	0.0191216	0.0487424	0.0450297	0.0399702	0.0445808	1.21449	0.00466952	0.0196324	2.33144	1.22122
790	Eucommin A	3.83	level1			549.197	283	NEG	C27H34O12		99633-12-2	C10560	Shikimates and Phenylpropanoids	Lignans	Furofuranoid lignans	GLGVEKKQPFRBAS-YPQUEWMKSA-N	0.0494734	0.0352244	0.0471522	0.04395	0.146894	0.114613	0.144219	0.135242	1.30776	0.00125227	0.00810562	3.07718	1.62161
791	Barlerin	3.83	level1			429.14	281.4	NEG	C19H28O12		57420-46-9		Terpenoids	Monoterpenoids	Iridoids monoterpenoids	ARFRZOLTIRQFCI-NGQYDJQZSA-N	0.114897	0.1189	0.123265	0.119021	0.0521573	0.0508787	0.0506996	0.0512452	1.34073	1.03126e-05	0.000570191	0.430557	-1.21572
792	(3S,4S)-3-hydroxy-4-[(4-hydroxy-3-methoxy-phenyl)methyl]-3-[[3-methoxy-4-[(2S,3R,4S,5S,6R)-3,4,5-trihydroxy-6-(hydroxymethyl)tetrahydropyran-2-yl]oxy-phenyl]methyl]tetrahydrofuran-2-one	3.83	level1			535.182	278.1	NEG	C26H32O12				Shikimates and Phenylpropanoids	Lignans	Dibenzylbutyrolactone lignans	VXYKGOAXVHSLDD-PTHUBMCESA-N	0.0278507	0.0319135	0.0339432	0.0312358	0.0531684	0.0493161	0.0523979	0.0516275	1.30184	0.000681116	0.00546054	1.65283	0.724938
795	5-[(3aS,4S,6aR)-2,5,5-trioxo-1,3,3a,4,6,6a-hexahydrothieno[3,4-d]imidazol-4-yl]pentanoic acid	3.83	level1			259.074	97.2	POS	C10H16N2O5S		40720-05-6	C20387	Alkaloids			QPFQYMONYBAUCY-ZKWXMUAHSA-N	0.0336767	0.0351098	0.0350603	0.0346156	0.0445403	0.042825	0.0448276	0.0440643	1.32442	0.000269006	0.00306831	1.27296	0.348188
798	Pyropheophorbide-a	3.83	level1			535.269	551.3	POS	C33H34N4O3		24533-72-0		Alkaloids			IEGUQQKIFBYXLG-BSHCMTTLSA-N	0.0312834	0.0310875	0.0304755	0.0309488	0.0498686	0.0482067	0.0467409	0.0482721	1.33714	5.00838e-05	0.00121969	1.55974	0.641305
800	Metformin	3.83	level1			130.108	277.5	POS	C4H11N5	HMDB0001921	1115-70-4	C07151	Alkaloids			XZWYZXLIPXDOLR-UHFFFAOYSA-N	0.0643722	0.0586376	0.0636591	0.062223	0.047003	0.0444366	0.0450915	0.0455104	1.31089	0.00104173	0.0071635	0.731408	-0.451252
801	N,N-Diethyl-2-aminoethanol	3.83	level1			100.112	236.7	POS	C6H15NO	HMDB0033971	100-37-8		Fatty acids	Fatty acyls	Fatty alcohols	BFSVOASYOCHEOV-UHFFFAOYSA-N	0.00336569	0.00348814	0.00374773	0.00353385	0.00304072	0.00211282	0.00243987	0.00253114	1.12847	0.0270522	0.0693267	0.716254	-0.481457
802	Pyridoxal (Vitamin B6)	3.83	level1			168.065	87.5	POS	C8H9NO3	HMDB0001545	66-72-8	C00250	Alkaloids	Nicotinic acid alkaloids	Pyridine alkaloids	RADKZDMFGJYCBB-UHFFFAOYSA-N	0.169482	0.147709	0.161553	0.159582	0.249924	0.265115	0.24745	0.254163	1.31793	0.0003585	0.00363691	1.59269	0.671461
805	HMMNI	3.83	level1			140.045	27.1	POS	C5H7N3O3	HMDB0247667	936-05-0		Alkaloids	Pseudoalkaloids		JSAQDPJIVQMBAY-UHFFFAOYSA-N	0.00157371	0.00162605	0.00135645	0.00151874	0.00187552	0.00198054	0.00191759	0.00192455	1.20873	0.00994392	0.0333984	1.2672	0.34165
807	10,11-dihydroxy-9-(hydroxymethyl)-1,2,6a,6b,9,12a-hexamethyl-2,3,4,5,6,6a,7,8,8a,10,11,12,13,14b-tetradecahydro-1H-picene-4a-carboxylic acid	3.82	level1			487.342	448.3	NEG	C30H48O5		464-92-6|76964-07-3		Terpenoids	Triterpenoids	Ursane and Taraxastane triterpenoids	JXSVIVRDWWRQRT-UHFFFAOYSA-N	0.0294846	0.0491338	0.0245851	0.0344012	1.37455	2.03067	1.36112	1.58878	1.33132	0.01952	0.0544269	46.1839	5.52932
808	2-[4-[3-(4-hydroxy-3-methoxy-phenyl)-1,3,3a,4,6,6a-hexahydrofuro[3,4-c]furan-6-yl]-2-methoxy-phenoxy]-6-(hydroxymethyl)tetrahydropyran-3,4,5-triol	3.82	level1			519.187	282.7	NEG	C26H32O11		11042-30-1		Shikimates and Phenylpropanoids	Lignans	Furofuranoid lignans	QLJNETOQFQXTLI-UHFFFAOYSA-N	0.117139	0.13329	0.128268	0.126232	0.448023	0.45613	0.439125	0.447759	1.33943	1.23066e-06	0.000240197	3.54711	1.82664
809	Fructose 1-phosphate	3.82	level1			259.022	492.4	NEG	C6H13O9P	HMDB0060467	15978-08-2	C01094	Carbohydrates	Saccharides	Monosaccharides	ZKLLSNQJRLJIGT-UYFOZJQFSA-N	0.026408	0.0213579	0.0239083	0.0238914	0.0621541	0.0526738	0.07028	0.0617026	1.31219	0.00203019	0.0111724	2.58263	1.36884
810	Itaconic acid	3.82	level1			129.019	391	NEG	C5H6O4	HMDB0002092	97-65-4	C00490	Fatty acids	Fatty Acids and Conjugates	Dicarboxylic acids	LVHBHZANLOWSRM-UHFFFAOYSA-N	0.116433	0.123665	0.125298	0.121799	0.221911	0.236293	0.309001	0.255735	1.29071	0.0370177	0.0876608	2.09965	1.07015
811	1-(1H-indol-3-yl)ethanone	3.82	level1			160.075	45.3	POS	C10H9NO		703-80-0		Alkaloids	Tryptophan alkaloids	Simple indole alkaloids	VUIMBZIZZFSQEE-UHFFFAOYSA-N	0.00756546	0.00172655	0.00641025	0.00523409	0.49539	0.329328	0.453032	0.425917	1.31411	0.0136472	0.0419774	81.3736	6.34649
812	3-[(2S,3R,4S,5R,6R)-3,5-dihydroxy-6-(hydroxymethyl)-4-[(2S,3R,4R,5R,6S)-3,4,5-trihydroxy-6-methyl-tetrahydropyran-2-yl]oxy-tetrahydropyran-2-yl]oxy-5,7-dihydroxy-2-(4-hydroxyphenyl)chromen-4-one	3.82	level1			593.151	305	NEG	C27H30O15		28447-29-2		Shikimates and Phenylpropanoids	Flavonoids	Flavonols	YFPYXTNSQOUHPS-NIILUQFKSA-N	0.0499685	0.0637512	0.0628619	0.0588605	0.0121724	0.0124976	0.0172077	0.0139592	1.31981	0.000693574	0.00552188	0.237157	-2.07608
814	6-aminopyridine-3-carboxylic acid	3.82	level1			137.035	308.7	NEG	C6H6N2O2		3167-49-5		Amino acids and Peptides	Small peptides	Aminoacids	ZCIFWRHIEBXBOY-UHFFFAOYSA-N	0.0229935	0.0256829	0.0185376	0.0224047	0.0525116	0.0556411	0.057091	0.0550812	1.31172	0.000192683	0.00254908	2.45847	1.29776
816	(2R,3S,4S,5R,6R)-2-[[(2R,3R,4R,5S)-3,4-dihydroxy-5-(hydroxymethyl)tetrahydrofuran-2-yl]oxymethyl]-6-(2-phenylethoxy)tetrahydropyran-3,4,5-triol	3.82	level1			415.161	268.3	NEG	C19H28O10				Shikimates and Phenylpropanoids	Phenylethanoids (C6-C2)	Phenylethanoids	DWYFWLYCTOAXKY-DXAFFUQDSA-N	0.425142	0.396425	0.392891	0.40482	0.0472951	0.0323097	0.0482363	0.0426137	1.33288	5.93457e-06	0.000435781	0.105266	-3.24789
819	NAE(16:0)	3.82	level1			300.289	538.5	POS	C18H37NO2	HMDB0002100	544-31-0	C16512	Fatty acids	Fatty amides	N-acyl ethanolamines (endocannabinoids)	HXYVTAGFYLMHSO-UHFFFAOYSA-N	0.0355979	0.0339527	0.0389622	0.0361709	0.0219828	0.0184327	0.0236782	0.0213646	1.27859	0.00227334	0.0120409	0.590656	-0.759611
823	(10S,11R)-1,10,11-trihydroxy-9-(hydroxymethyl)-1,2,6a,6b,9,12a-hexamethyl-2,3,4,5,6,6a,7,8,8a,10,11,12,13,14b-tetradecahydropicene-4a-carboxylic acid	3.82	level1			503.337	373.9	NEG	C30H48O6				Terpenoids	Triterpenoids	Ursane and Taraxastane triterpenoids	YCOKATFNRPZIIU-FYQRVOBBSA-N	0.00153768	0.00652634	0.00131126	0.00312509	0.238338	0.21659	0.26681	0.240579	1.30986	0.00336319	0.015655	76.9831	6.26647
824	2-hydroxy-3-[(12-hydroxy-4-methyl-2,9-dioxo-4,5,6,7,8,8a,10,11,12,12a-decahydro-1H-benzo[d]oxecin-11-yl)sulfanyl]propanoic acid	3.82	level1			355.121	341	NEG	C17H26O7S				Polyketides	Macrolides	Macrolide lactones	KUAXOGAXEHNLKN-UHFFFAOYSA-N	0.0415848	0.0436891	0.0438686	0.0430475	0.0182027	0.0192417	0.0204828	0.0193091	1.33677	1.76471e-05	0.000722678	0.448553	-1.15665
825	Coniferaldehyde	3.82	level1			179.07	300.7	POS	C10H10O3	HMDB0141782	20649-42-7	C02666	Shikimates and Phenylpropanoids	Phenylpropanoids (C6-C3)	Cinnamic acids and derivatives	DKZBBWMURDFHNE-NSCUHMNNSA-N	0.0226645	0.0217286	0.0211016	0.0218316	0.0424411	0.0397433	0.0476986	0.0432943	1.32435	0.000836735	0.00623302	1.98311	0.987761
826	(2R,3R,4R,5R,6S)-2-[[(2R,3S,4S,5R,6S)-6-(4-allyl-2-methoxy-phenoxy)-3,4,5-trihydroxy-tetrahydropyran-2-yl]methoxy]-6-methyl-tetrahydropyran-3,4,5-triol	3.82	level1			453.173	296.1	NEG	C22H32O11		138772-01-7		Shikimates and Phenylpropanoids	Phenylpropanoids (C6-C3)	Cinnamic acids and derivatives	KNUPPNGCEAQRSV-XCPHWCDESA-N	0.0774032	0.109056	0.0836991	0.0900527	0.0425865	0.0438221	0.0429965	0.043135	1.29146	0.0398112	0.0926053	0.478997	-1.06191
827	2-hexoxy-6-[(3,4,5-trihydroxytetrahydropyran-2-yl)oxymethyl]tetrahydropyran-3,4,5-triol	3.82	level1			377.182	274.7	NEG	C17H32O10				Fatty acids	Fatty acyl glycosides	Fatty acyl glycosides of mono- and disaccharides	PSYNCYUUTFEJHA-UHFFFAOYSA-N	0.145118	0.142237	0.158196	0.148517	0.251732	0.31595	0.250699	0.272794	1.29335	0.00494303	0.0204144	1.83678	0.877179
828	[6-[3,4-dihydroxy-2,5-bis(hydroxymethyl)tetrahydrofuran-2-yl]oxy-3,4,5-trihydroxy-tetrahydropyran-2-yl]methyl (E)-3-(4-hydroxy-3-methoxy-phenyl)prop-2-enoate	3.82	level1			517.156	255	NEG	C22H30O14		137941-45-8		Shikimates and Phenylpropanoids	Phenylpropanoids (C6-C3)	Cinnamic acids and derivatives	XMBZZLUIFFOAHR-HWKANZROSA-N	0.259257	0.228156	0.201971	0.229795	0.907033	0.83539	0.882478	0.874967	1.3345	1.75508e-05	0.000720646	3.8076	1.92888
829	2,6-Dimethoxy-1,4-benzoquinone	3.82	level1			169.049	236.6	POS	C8H8O4	HMDB0029673	530-55-2	C10331	Polyketides	Aromatic polyketides	Benzoquinones	OLBNOBQOQZRLMP-UHFFFAOYSA-N	0.0394837	0.0378034	0.0421845	0.0398239	0.248448	0.239832	0.25516	0.247814	1.34136	1.45094e-06	0.000256301	6.22274	2.63755
830	Folinic acid	3.82	level1			472.159	211.6	NEG	C20H23N7O7	HMDB0001562	68538-85-2	C03479	Alkaloids	Pseudoalkaloids	pteridine alkaloids	VVIAGPKUTFNRDU-STQMWFEESA-N	0.032271	0.0277718	0.0216549	0.0272326	0.0738898	0.0679801	0.0701304	0.0706668	1.30472	0.000250083	0.00293696	2.59494	1.3757
831	Galactose 1-phosphate	3.82	level1			259.022	40	NEG	C6H13O9P	HMDB0000645	2255-14-3	C00446	Carbohydrates	Saccharides	Monosaccharides	HXXFSFRBOHSIMQ-FPRJBGLDSA-N	0.213987	0.197856	0.215977	0.209273	0.245514	0.260952	0.248404	0.251623	1.26213	0.00470758	0.0197352	1.20237	0.265878
832	Formiminoglutamic acid	3.82	level1			175.071	418.4	POS	C6H10N2O4	HMDB0000854	816-90-0	C00439	Amino acids and Peptides	Small peptides	Aminoacids	NRXIKWMTVXPVEF-BYPYZUCNSA-N	0.00966504	0.0109155	0.0103942	0.0103249	0.0131636	0.0116253	0.0132827	0.0126905	1.17998	0.0214642	0.0583346	1.22912	0.297622
833	(2R,3R,4S,5S,6R)-2-benzyloxy-6-[[(2R,3R,4R)-3,4-dihydroxy-4-(hydroxymethyl)tetrahydrofuran-2-yl]oxymethyl]tetrahydropyran-3,4,5-triol	3.82	level1			401.144	233.6	NEG	C18H26O10		115009-57-9		Shikimates and Phenylpropanoids			NJMQSVWMCODQIP-FQXXIRCGSA-N	0.163066	0.149713	0.160993	0.157924	0.0549819	0.0541059	0.0582468	0.0557782	1.33923	1.92489e-05	0.000753936	0.353196	-1.50146
834	Amantadine	3.82	level1			152.143	205.9	POS	C10H17N	HMDB0015051	768-94-5	C06818				DKNWSYNQZKUICI-UHFFFAOYSA-N	0.000678715	0.000442744	0.000535335	0.000552264	0.00496236	0.00497439	0.00509529	0.00501068	1.3347	6.42901e-07	0.000187824	9.07297	3.18158
835	2-methyl-3-[(2S,3R,4S,5S,6R)-3,4,5-trihydroxy-6-(hydroxymethyl)tetrahydropyran-2-yl]oxy-pyran-4-one	3.82	level1			269.066	197.6	NEG	C12H16O8		20847-13-6		Polyketides	Cyclic polyketides	4-pyrone derivatives	YGSIRXHFAUFUEJ-GPTQDWHKSA-N	1.89864	1.89973	1.91286	1.90374	3.87347	3.8602	4.03727	3.92365	1.3413	0.000741158	0.00576565	2.06102	1.04336
836	1-Methylpseudouridine	3.82	level1			257.077	173.8	NEG	C10H14N2O6		13860-38-3		Carbohydrates	Nucleosides	Pyrimidine nucleos(t)ides	UVBYMVOUBXYSFV-XUTVFYLZSA-N	0.0975764	0.10126	0.0962301	0.0983556	0.0884234	0.0938466	0.092562	0.0916107	1.1211	0.0385742	0.0904436	0.931423	-0.102491
838	(4aS,6aS,6bR,9R,10S,11R,12aR)-10,11-dihydroxy-9-(hydroxymethyl)-2,2,6a,6b,9,12a-hexamethyl-1,3,4,5,6,6a,7,8,8a,10,11,12,13,14b-tetradecahydropicene-4a-carboxylic acid	3.81	level1			487.342	76.6	NEG	C30H48O5				Terpenoids	Triterpenoids	Oleanane triterpenoids	RWNHLTKFBKYDOJ-FLKVJBKRSA-N	0.095256	0.126239	0.111251	0.110915	1.70271	1.70036	1.88324	1.7621	1.3394	0.0010911	0.00737715	15.8869	3.98977
841	3,5-Di-tert-butylphenol	3.81	level1			205.159	496.6	NEG	C14H22O		1138-52-9		Shikimates and Phenylpropanoids			ZDWSNKPLZUXBPE-UHFFFAOYSA-N	0.133589	0.130597	0.147095	0.137094	0.0422727	0.0582677	0.0453607	0.0486337	1.31726	0.000232576	0.00281153	0.354747	-1.49514
843	Phloroglucinaldehyde	3.81	level1			153.019	277.2	NEG	C7H6O4	HMDB0125090	487-70-7		Polyketides	Phloroglucinols	Acyl phloroglucinols	BTQAJGSMXCDDAJ-UHFFFAOYSA-N	0.507004	0.448264	0.498401	0.484556	0.138615	0.135507	0.137063	0.137062	1.3396	0.00271272	0.0135507	0.28286	-1.82184
851	(3S)-3-acetoxy-3-[(1R,2R,5R,6R,10S,11S,14S)-11-(3-furyl)-5-(1-hydroxy-1-methyl-ethyl)-2,6,10-trimethyl-3,13-dioxo-12,15-dioxatetracyclo[8.5.0.01,14.02,7]pentadecan-6-yl]propanoic acid	3.81	level1			513.211	350.6	NEG	C28H36O10				Terpenoids	Triterpenoids	Limonoids	ZIKZPLSIAVHITA-FBCIBIQSSA-N	0.0590098	0.0496305	0.0560433	0.0548945	0.0364989	0.0296819	0.032275	0.0328186	1.28198	0.00292386	0.0142325	0.597848	-0.742149
852	4-[[(3R,4R,5S)-5-(4-hydroxy-3-methoxy-phenyl)-4-(hydroxymethyl)tetrahydrofuran-3-yl]methyl]-2-methoxy-phenol	3.81	level1			359.15	306.1	NEG	C20H24O6		27003-73-2	C10646	Shikimates and Phenylpropanoids	Lignans	Furanoid lignans	MHXCIKYXNYCMHY-AUSJPIAWSA-N	0.0180868	0.0248295	0.0202028	0.0210397	0.0502564	0.052386	0.0519949	0.0515458	1.31353	0.000129544	0.00203586	2.44993	1.29274
853	2-(2-Butoxyethoxy)ethanol	3.81	level1			163.132	304.6	POS	C8H18O3	HMDB0244918	112-34-5		Fatty acids			OAYXUHPQHDHDDZ-UHFFFAOYSA-N	0.0109228	0.0125931	0.0107592	0.011425	0.0149945	0.0143595	0.0139052	0.0144197	1.21628	0.0108324	0.0355294	1.26212	0.335844
854	2-[(1R,2R)-3-oxo-2-[(Z)-5-[3,4,5-trihydroxy-6-(hydroxymethyl)tetrahydropyran-2-yl]oxypent-2-enyl]cyclopentyl]acetic acid	3.81	level1			387.166	249.7	NEG	C18H28O9		124649-25-8		Fatty acids	Fatty acyl glycosides	Fatty acyl glycosides of mono- and disaccharides	JFDNMLUPLXZXGV-YAYCWVCRSA-N	0.10611	0.139592	0.112662	0.119455	0.157445	0.155533	0.143981	0.15232	1.09545	0.0412394	0.0951033	1.27513	0.350643
857	Succinate	3.81	level1			117.019	390.4	NEG	C4H6O4	HMDB0000254	110-15-6	C00042	Fatty acids	Fatty Acids and Conjugates	Dicarboxylic acids	KDYFGRWQOYBRFD-UHFFFAOYSA-N	0.230131	0.241021	0.217908	0.229686	0.181635	0.167177	0.167119	0.171977	1.29283	0.00218724	0.0117259	0.748747	-0.41745
864	Pyrogallol	3.8	level1			127.039	95.2	POS	C6H6O3	HMDB0013674	87-66-1	C01108	Shikimates and Phenylpropanoids			WQGWDDDVZFFDIG-UHFFFAOYSA-N	0.0610646	0.0632341	0.0603315	0.0615434	0.107076	0.106588	0.0910601	0.101575	1.31075	0.00168292	0.00987481	1.65046	0.722864
865	PC(32:1)	3.8	level1			714.548	618.1	POS	C40H78NO8P							RRCMFZZLICZISN-ZNIIMWJUSA-N	0.748316	0.747307	0.765798	0.753807	1.09007	1.07047	0.983748	1.0481	1.31679	0.00089614	0.00651542	1.3904	0.475505
872	(10E,15Z)-9,12,13-trihydroxyoctadeca-10,15-dienoic acid	3.8	level1			327.217	376.6	NEG	C18H32O5		185147-97-1		Fatty acids	Octadecanoids	Other Octadecanoids	MKYUCBXUUSZMQB-MKZMYESJSA-N	11.8743	14.1433	12.894	12.9705	22.7628	22.9577	21.8928	22.5378	1.31805	0.000199168	0.00260085	1.73761	0.797107
874	(E)-4-hydroxydodec-2-enedioic acid	3.8	level1			243.123	324.4	NEG	C12H20O5				Fatty acids	Fatty Acids and Conjugates	Dicarboxylic acids	UHLUIRZFRDVZGV-CMDGGOBGSA-N	1.61365	1.85522	1.74854	1.73913	0.587707	0.623697	0.607273	0.606225	1.33827	0.00320734	0.0151476	0.348579	-1.52044
876	Swertiamarin	3.8	level1			355.103	248.1	NEG	C16H22O10		17388-39-5	C09800	Terpenoids	Monoterpenoids	Secoiridoid monoterpenoids	HEYZWPRKKUGDCR-QBXMEVCASA-N	0.34308	0.341927	0.348222	0.34441	0.494112	0.483755	0.474337	0.484068	1.33856	2.05914e-05	0.000780443	1.4055	0.491084
877	Trp-Gly	3.8	level1			262.118	216.4	POS	C13H15N3O3	HMDB0029083	7360-09-0		Amino acids and Peptides	Small peptides	Dipeptides	UYKREHOKELZSPB-JTQLQIEISA-N	0.0174707	0.0160147	0.0164604	0.0166486	0.0233627	0.0227429	0.0209575	0.0223543	1.29302	0.0024514	0.0126733	1.34272	0.425154
878	(12Z,15Z)-10-hydroxyoctadeca-12,15-dienoic acid	3.8	level1			295.227	56.5	NEG	C18H32O3				Fatty acids	Octadecanoids	Other Octadecanoids	WPPBDPYWQAWPCV-MLQKXRJWSA-N	4.26548	5.4746	4.74908	4.82972	8.51588	8.59427	7.7284	8.27952	1.28667	0.00151873	0.00921878	1.71429	0.777608
879	3,3-Dimethylglutaric acid	3.8	level1			159.066	70.6	NEG	C7H12O4	HMDB0002441	4839-46-7		Fatty acids	Fatty Acids and Conjugates	Dicarboxylic acids	DUHQIGLHYXLKAE-UHFFFAOYSA-N	0.275126	0.327501	0.311562	0.30473	0.04672	0.0529652	0.045996	0.0485604	1.33913	0.00312216	0.0148713	0.159356	-2.64968
882	9-Ethyladenine	3.79	level1			164.092	63.9	POS	C7H9N5		2715-68-6		Alkaloids	Pseudoalkaloids	Purine alkaloids	MUIPLRMGAXZWSQ-UHFFFAOYSA-N	0.00499337	0.00662022	0.00628866	0.00596742	0.0030355	0.00300325	0.00246943	0.00283606	1.28841	0.00408506	0.0178848	0.475257	-1.07322
883	PC(16:0/18:0)	3.79	level1			744.587	553.2	POS	C42H84NO8P	HMDB0007970	59403-51-9		Fatty acids	Glycerophospholipids	Glycerophosphocholines	PZNPLUBHRSSFHT-RRHRGVEJSA-N	0.0128048	0.0148507	0.0148247	0.0141601	0.00215066	0.00240882	0.00707256	0.00387735	1.18748	0.00407849	0.0178657	0.273822	-1.86869
884	1-(2,6-dihydroxyphenyl)-9-phenyl-nonan-1-one	3.79	level1			325.184	550.4	NEG	C21H26O3		63335-23-9		Polyketides	Aromatic polyketides	Catechols with side chains	IAXIHKJASWPASP-UHFFFAOYSA-N	2.09153	1.99815	1.85027	1.97998	1.35213	1.45957	1.53328	1.44833	1.27543	0.00374517	0.0168393	0.731486	-0.451099
885	Ascorbyl palmitate	3.79	level1			415.268	524.2	POS	C22H38O7	HMDB0039883	137-66-6		Fatty acids	Fatty esters	Wax monoesters	QAQJMLQRFWZOBN-UHFFFAOYSA-N	0.0016187	0.00119679	0.00152198	0.00144582	0.00473129	0.00387332	0.00332499	0.00397653	1.29626	0.00411947	0.0179891	2.75036	1.45962
886	(1R,6S,7S)-9-[(Z)-2-methoxycarbonyl-3-methyl-but-1-enyl]-5,5-dimethyl-8,11-dioxo-12-oxatricyclo[5.3.2.01,6]dodec-9-ene-10-carboxylic acid	3.79	level1			389.163	424.6	NEG	C21H26O7		197799-63-6		Terpenoids	Sesquiterpenoids		CAXSJVGHYYBJKT-GVXCCEMESA-N	0.0289469	0.0330543	0.0278483	0.0299498	0.0738518	0.0909436	0.081067	0.0819541	1.32539	0.000562267	0.00483655	2.73638	1.45227
887	(3aR,5aR,9bR)-3a-hydroxy-5a,9-dimethyl-3-methylene-4,5,6,7,8,9b-hexahydrobenzo[g]benzofuran-2-one	3.79	level1			247.134	372.1	NEG	C15H20O3				Terpenoids	Sesquiterpenoids	Eudesmane sesquiterpenoids	XMPDAVDYIOMTLX-BPLDGKMQSA-N	0.0423435	0.0566487	0.0525524	0.0505148	0.0131846	0.0143032	0.0102672	0.012585	1.31948	0.00101315	0.00704589	0.249135	-2.005
890	Desaminotyrosine	3.79	level1			165.055	284.9	NEG	C9H10O3	HMDB0002199	501-97-3	C01744	Shikimates and Phenylpropanoids			NMHMNPHRMNGLLB-UHFFFAOYSA-N	0.235199	0.237817	0.24009	0.237702	0.109356	0.109094	0.109575	0.109342	1.34233	0.000105362	0.0018154	0.459994	-1.12031
891	N-Acetylphenylalanine	3.79	level1			206.082	257	NEG	C11H13NO3	HMDB0000512	2018-61-3	C03519	Amino acids and Peptides	Small peptides	Dipeptides	CBQJSKKFNMDLON-JTQLQIEISA-N	3.72519	4.06623	4.00175	3.93106	2.79289	2.88131	2.68965	2.78795	1.31857	0.000642989	0.00526372	0.709212	-0.495712
892	Rizatriptan (benzoate)	3.79	level1			390.196	217.2	NEG	C22H25N5O2		145202-66-0	D00675	Alkaloids	Tryptophan alkaloids	Simple indole alkaloids	JPRXYLQNJJVCMZ-UHFFFAOYSA-N	0.00332688	0.00345453	0.00528015	0.00402052	0.00986072	0.010559	0.0101914	0.0102037	1.28	0.000733017	0.00572589	2.5379	1.34364
893	Crotonoside	3.79	level1			284.098	73.8	POS	C10H13N5O5		1818-71-9	C08432	Carbohydrates	Nucleosides	Purine nucleos(t)ides	MIKUYHXYGGJMLM-UUOKFMHZSA-N	0.243849	0.205929	0.224514	0.224764	0.117471	0.124964	0.132262	0.124899	1.31492	0.00105111	0.00720275	0.55569	-0.847649
894	3-Aminobutanoic acid	3.79	level1			102.056	391.2	NEG	C4H9NO2		541-48-0		Amino acids and Peptides	Small peptides	Aminoacids	OQEBBZSWEGYTPG-UHFFFAOYSA-N	4.98933	4.91754	5.12204	5.00964	7.15417	6.79843	6.66836	6.87366	1.3273	0.000288683	0.00319925	1.37209	0.456372
898	5'-Deoxyadenosine	3.79	level1			252.107	113.9	POS	C10H13N5O3	HMDB0001983	4754-39-6	C05198	Carbohydrates	Nucleosides	Purine nucleos(t)ides	XGYIMTFOTBMPFP-KQYNXXCUSA-N	0.00663995	0.00716823	0.00739951	0.00706923	0.0159051	0.014752	0.0156544	0.0154372	1.33536	3.60804e-05	0.00103225	2.18372	1.12678
899	Sodium lauryl sulfoacetate	3.79	level1			307.155	49.9	NEG	C14H28O5S		1847-58-1		Fatty acids	Fatty esters	Wax monoesters	LBIZZGIYNNLXQN-UHFFFAOYSA-N	1.61972	1.76933	1.65586	1.68164	0.549525	0.733272	0.378712	0.553836	1.27265	0.0005444	0.00474143	0.329344	-1.60233
900	[2-(hydroxymethyl)-3-methoxy-4-methyl-5-(3-methylbut-2-enoxy)phenyl]methanol	3.79	level1			265.147	25.2	NEG	C15H22O4		17811-28-8	C10840	Polyketides	Aromatic polyketides	Simple aromatic polyketides	DUMQPTRUYCCSEZ-UHFFFAOYSA-N	32.4591	36.2229	32.8886	33.8568	42.8024	38.6868	37.7131	39.7341	1.12569	0.0400881	0.0930906	1.17359	0.230929
901	(2Z,4E)-5-[(1R,3R,5S,8S)-3,8-dihydroxy-1,5-dimethyl-6-oxabicyclo[3.2.1]octan-8-yl]-3-methyl-penta-2,4-dienoic acid	3.78	level1			281.139	263.9	NEG	C15H22O5				Terpenoids	Apocarotenoids	Apocarotenoids(ε-)	XIVFQYWMMJWUCD-QRFHCBFLSA-N	0.134635	0.153242	0.144176	0.144017	0.0308961	0.0316042	0.0264184	0.0296396	1.33779	3.42255e-05	0.00100402	0.205805	-2.28065
902	gamma-CEHC (gamma-Carboxyethyl hydrochroman)	3.78	level1			263.128	101	NEG	C15H20O4	HMDB0001931	178167-75-4		Terpenoids	Meroterpenoids	Prenyl quinone meroterpenoids	VMJQLPNCUPGMNQ-UHFFFAOYSA-N	0.336937	0.336183	0.346635	0.339918	0.26299	0.244259	0.254197	0.253815	1.32508	0.000173542	0.00240331	0.746695	-0.421408
904	(2E,4E)-3,5,7-trimethylocta-2,4-dienedioic acid	3.78	level1			211.097	347.6	NEG	C11H16O4				Fatty acids	Fatty Acids and Conjugates	Branched fatty acids	QEOAMNGZTSERJN-IJYBVRAASA-N	0.0310828	0.0328833	0.0306289	0.0315317	0.0276492	0.0289251	0.0259703	0.0275149	1.17436	0.0216235	0.0586515	0.872611	-0.19659
906	Methylmalonic acid	3.78	level1			117.019	390.4	NEG	C4H6O4	HMDB0000202	516-05-2	C02170	Fatty acids	Fatty Acids and Conjugates	Dicarboxylic acids	ZIYVHBGGAOATLY-UHFFFAOYSA-N	0.230131	0.241021	0.217908	0.229686	0.181635	0.167177	0.167119	0.171977	1.29283	0.00218724	0.0117259	0.748747	-0.41745
907	NAE(22:0)	3.78	level1			384.382	607.6	POS	C24H49NO2		94109-05-4		Fatty acids	Fatty amides	N-acyl ethanolamines (endocannabinoids)	XHFWUECSNJWBJU-UHFFFAOYSA-N	0.00785222	0.00994731	0.00928719	0.0090289	0.00388349	0.00453128	0.00388546	0.00410007	1.31207	0.00166923	0.00982446	0.454105	-1.1389
914	Forskolin	3.78	level1			409.221	428.1	NEG	C22H34O7		66575-29-9	C09076|D03584	Terpenoids	Diterpenoids	Labdane diterpenoids	OHCQJHSOBUTRHG-KGGHGJDLSA-N	0.0444348	0.0475484	0.0459551	0.0459794	0.0749242	0.0829257	0.075719	0.0778563	1.32815	0.00029423	0.00323475	1.69329	0.759825
919	7-ethyl-8-hydroxy-4,7-dimethyl-6-oxo-8H-isochromene-3-carboxylic acid	3.78	level1			263.092	274.3	NEG	C14H16O5				Polyketides	Chromanes	Azaphilones	CNXACDYPVKUDEK-UHFFFAOYSA-N	0.0303689	0.034867	0.0338717	0.0330359	0.0139761	0.0154182	0.0113579	0.0135841	1.31112	0.000424174	0.00403914	0.411191	-1.28212
920	5-Hydroxyhexanoic acid	3.78	level1			115.075	218.3	POS	C6H12O3	HMDB0000525	44843-89-2		Fatty acids	Fatty Acids and Conjugates	Hydroxy fatty acids	YDCRNMJQROAWFT-UHFFFAOYSA-N	0.0238003	0.0262506	0.033284	0.0277783	0.0561678	0.0556884	0.0534072	0.0550878	1.28818	0.000774126	0.00592165	1.98312	0.987773
921	Dopamine	3.78	level1			136.075	65.2	POS	C8H11NO2	HMDB0000073	62-31-7	C03758	Alkaloids	Tyrosine alkaloids	Phenylethylamines	VYFYYTLLBUKUHU-UHFFFAOYSA-N	0.0276655	0.0221266	0.0328525	0.0275482	0.136002	0.104152	0.102967	0.114374	1.31561	0.00151934	0.00921985	4.15176	2.05372
922	(3S,4R,6aR,6bS,8aS,11R,12R,12aS,14bR)-3,12-dihydroxy-4,6a,6b,11,12,14b-hexamethyl-8a-[(2S,3R,4S,5S,6R)-3,4,5-trihydroxy-6-[[(2R,3R,4S,5S,6R)-3,4,5-trihydroxy-6-(hydroxymethyl)tetrahydropyran-2-yl]oxymethyl]tetrahydropyran-2-yl]oxycarbonyl-1,2,3,4a,5,6,7,8,9,10,11,12a,14,14a-tetradecahydropicene-4-carboxylic acid	3.78	level1			825.426	353.9	NEG	C42H66O16				Terpenoids	Triterpenoids	Ursane and Taraxastane triterpenoids	LCQFYEBJTAIMPC-PVSIORMYSA-N	1.17468e-05	1.2935e-05	1.24167e-05	1.23661e-05	0.0030269	0.00239036	0.00289179	0.00276968	1.34189	0.00489522	0.020278	223.973	7.80718
923	Scopine	3.78	level1			156.101	169.6	POS	C8H13NO2		498-45-3		Alkaloids	Ornithine alkaloids	Tropane alkaloids	FIMXSEMBHGTNKT-UPGAHCIJSA-N	0.0917404	0.101795	0.103327	0.098954	0.0613961	0.0597037	0.0567514	0.0592837	1.32373	0.000515209	0.0045875	0.599104	-0.739122
924	Blinin	3.78	level1			373.205	53.3	NEG	C22H32O6		125675-09-4		Terpenoids	Diterpenoids	Colensane and Clerodane diterpenoids	XXSSNTKMBVTREV-DDHROXKOSA-N	0.429886	0.380949	0.371548	0.394128	0.937872	0.924489	0.847136	0.903166	1.33138	0.000110239	0.00186066	2.29156	1.19633
927	(1S,4aR,6aS,6bR,9R,10R,11R,12aR,14bS)-1,10,11-trihydroxy-9-(hydroxymethyl)-2,2,6a,6b,9,12a-hexamethyl-1,3,4,5,6,6a,7,8,8a,10,11,12,13,14b-tetradecahydropicene-4a-carboxylic acid	3.77	level1			503.337	373.9	NEG	C30H48O6		58880-25-4		Terpenoids	Triterpenoids	Oleanane triterpenoids	IFIQVSCCFRXSJV-ZIZFEDMCSA-N	0.00153768	0.00652634	0.00131126	0.00312509	0.238338	0.21659	0.26681	0.240579	1.30986	0.00336319	0.015655	76.9831	6.26647
933	2-Hydroxy-6-methoxybenzoic acid	3.77	level1			167.035	257.7	NEG	C8H8O4		3147-64-6		Shikimates and Phenylpropanoids	Phenolic acids (C6-C1)	Simple phenolic acids	AAUQLHHARJUJEH-UHFFFAOYSA-N	2.25461	2.31926	2.34928	2.30772	6.44376	6.63807	6.29065	6.45749	1.34126	2.38742e-06	0.000306237	2.79822	1.48451
934	12-(1,1-dimethylallyl)-5,9,10-trihydroxy-2,2-dimethyl-pyrano[3,2-b]xanthen-6-one	3.77	level1			393.137	486.2	NEG	C23H22O6		5848-14-6	C10076	Shikimates and Phenylpropanoids	Xanthones	Plant xanthones	XRVLGJCHUWXTDX-UHFFFAOYSA-N	0.00135279	0.000510001	0.000936431	0.000933073	0.0106772	0.00954758	0.0139427	0.0113892	1.30686	0.00145546	0.00896761	12.2061	3.60953
936	4-hydroxy-3',6-dimethoxy-5'-methyl-spiro[benzofuran-2,4'-cyclohex-2-ene]-1',3-dione	3.77	level1			303.09	312.5	NEG	C16H16O6				Polyketides	Aromatic polyketides	Griseofulvins	RFVMVHYMAGKNDK-UHFFFAOYSA-N	1.26951	1.32132	1.2576	1.28281	3.08989	3.17952	2.95003	3.07315	1.33982	1.35504e-05	0.000641542	2.39564	1.26041
937	6-[4-hydroxy-2-methyl-6-[(2S,3R,4S,5S,6R)-3,4,5-trihydroxy-6-(hydroxymethyl)tetrahydropyran-2-yl]oxy-phenyl]-4-methoxy-pyran-2-one	3.77	level1			409.114	292	NEG	C19H22O10		38412-46-3		Polyketides	Cyclic polyketides	2-pyrone derivatives	KFJNVVJUICKJEQ-LQDZTQBFSA-N	0.213831	0.240028	0.256247	0.236702	0.0885632	0.0819288	0.08849	0.0863273	1.33373	0.000278148	0.00312695	0.364709	-1.45518
938	5-hydroxy-2-(4-hydroxy-3-methoxy-phenyl)-7-[(2S,3R,4S,5S,6R)-3,4,5-trihydroxy-6-[[(2R,3R,4R,5R,6S)-3,4,5-trihydroxy-6-methyl-tetrahydropyran-2-yl]oxymethyl]tetrahydropyran-2-yl]oxy-chroman-4-one	3.77	level1			591.165	279.9	NEG	C28H34O15		150172-22-8		Shikimates and Phenylpropanoids	Flavonoids	Flavanones	APSNPMVGBGZYAJ-ATDINVGTSA-N	0.194603	0.219477	0.208025	0.207368	0.00531843	0.00573007	0.0069699	0.00600613	1.34093	0.00121429	0.00794298	0.0289636	-5.10961
939	Histidine	3.77	level1			156.076	45.6	POS	C6H9N3O2	HMDB0000177	71-00-1	C00135	Amino acids and Peptides	Small peptides	Aminoacids	HNDVDQJCIGZPNO-YFKPBYRVSA-N	0.527709	0.480445	0.502186	0.503447	0.285834	0.260818	0.263953	0.270202	1.33102	0.000121434	0.00196065	0.536704	-0.897802
940	Mandelic acid	3.77	level1			151.04	225.2	NEG	C8H8O3	HMDB0062635	611-71-2	C01983	Shikimates and Phenylpropanoids	Phenylpropanoids (C6-C3)	Cinnamic acids and derivatives	IWYDHOAUDWTVEP-SSDOTTSWSA-N	0.0429867	0.0448754	0.0437664	0.0438762	0.0375584	0.0386775	0.0377218	0.0379859	1.31367	0.000820277	0.00615296	0.865752	-0.207974
941	Eugenin	3.77	level1			207.065	53.8	POS	C11H10O4		480-34-2	C20210	Polyketides	Chromanes	Chromones	SUTUBQHKZRNZRA-UHFFFAOYSA-N	0.00289391	0.00290878	0.00309261	0.0029651	0.00867261	0.0065582	0.00946089	0.00823057	1.31057	0.0255023	0.0663815	2.77582	1.47291
944	Telmisartan	3.77	level1			497.235	88.4	POS	C33H30N4O2	HMDB0015101	144701-48-4	C07710	Alkaloids	Anthranilic acid alkaloids	Phenazine alkaloids	RMMXLENWKUUMAY-UHFFFAOYSA-N	0.143377	0.13741	0.147453	0.142747	0.190071	0.182757	0.231156	0.201328	1.2264	0.0188066	0.0529744	1.41039	0.496094
946	Phenothiazine	3.77	level1			200.055	52	POS	C12H9NS	HMDB0302434	92-84-2	D02601	Alkaloids	Anthranilic acid alkaloids	Phenazine alkaloids	WJFKNYWRSNBZNX-UHFFFAOYSA-N	0.0350288	0.0398208	0.0375339	0.0374612	0.178048	0.149368	0.178252	0.168556	1.33667	0.00461228	0.0194674	4.49949	2.16976
950	5-[2-(3,4-dihydroxy-2,5-dimethoxyoxolan-3-yl)ethyl]-1,4a-dimethyl-6-methylidene-3,4,5,7,8,8a-hexahydro-2H-naphthalene-1-carboxylic acid	3.77	level1			411.242	26.4	NEG	C22H36O7				Terpenoids	Diterpenoids	Labdane diterpenoids	ZVVJVAKXIGRPRA-UHFFFAOYSA-N	0.328503	0.422314	0.404335	0.385051	0.533135	0.577991	0.496608	0.535911	1.18234	0.0153396	0.0456654	1.39179	0.476946
953	coumaroyl(3-OMe)(-2)Glc(a1-2b)L-Fruf	3.76	level1			517.155	257	NEG	C22H30O14				Shikimates and Phenylpropanoids	Phenylpropanoids (C6-C3)	Cinnamic acids and derivatives	GFXQBGHEPGXJGM-KSLXGCCYSA-N	0.0103772	0.00658295	0.00945497	0.00880503	0.0223001	0.0200257	0.0258369	0.0227209	1.27705	0.00241686	0.01255	2.58045	1.36762
954	3-Hydroxycinnamic acid	3.76	level1			163.04	294.1	NEG	C9H8O3	HMDB0001713	14755-02-3	C12621	Shikimates and Phenylpropanoids	Phenylpropanoids (C6-C3)	Cinnamic acids and derivatives	KKSDGJDHHZEWEP-SNAWJCMRSA-N	0.0745474	0.0670613	0.0760695	0.0725594	0.0137712	0.0177723	0.0178287	0.0164574	1.33205	5.41894e-05	0.00127117	0.226813	-2.14043
955	(2R,3S,4S,5R,6S)-2-[[(2R,3R,4R)-3,4-dihydroxy-4-(hydroxymethyl)tetrahydrofuran-2-yl]oxymethyl]-6-[4-hydroxy-3-(3-methylbut-2-enyl)phenoxy]tetrahydropyran-3,4,5-triol	3.76	level1			453.173	296.1	NEG	C22H32O11				Terpenoids			UEAATLOMPYZOFF-PYEGHPNJSA-N	0.0774032	0.109056	0.0836991	0.0900527	0.0425865	0.0438221	0.0429965	0.043135	1.29146	0.0398112	0.0926053	0.478997	-1.06191
956	Citropten	3.76	level1			207.065	53.8	POS	C11H10O4		487-06-9		Shikimates and Phenylpropanoids	Coumarins	Simple coumarins	NXJCRELRQHZBQA-UHFFFAOYSA-N	0.00289391	0.00290878	0.00309261	0.0029651	0.00867261	0.0065582	0.00946089	0.00823057	1.31057	0.0255023	0.0663815	2.77582	1.47291
957	[(1R)-2-hydroxy-1-[(1S,2R,4S,6S,8R,12S,13S,14S,19R)-12-hydroxy-1,2,8,14,18,18-hexamethyl-17-oxo-5-oxapentacyclo[11.8.0.02,10.04,9.014,19]henicos-9-en-6-yl]-2-methyl-propyl] acetate	3.76	level1			529.353	463.2	NEG	C32H50O6		443683-76-9		Terpenoids	Triterpenoids	Fusidane triterpenoids	KFWYQAKZMXFEFB-XKFNBYHKSA-N	0.000414009	0.000312516	0.000222975	0.0003165	0.00629904	0.010497	0.00824458	0.00834688	1.32943	0.0218747	0.0591734	26.3724	4.72096
959	(Z)-6-methyl-2-(4-methylpent-3-enyl)hept-2-enedioic acid	3.76	level1			253.144	401.9	NEG	C14H22O4				Fatty acids	Fatty Acids and Conjugates	Branched fatty acids	NLMAGFGYJVPKJJ-XFXZXTDPSA-N	0.0491939	0.0581452	0.0537979	0.0537124	0.299575	0.247699	0.219573	0.255616	1.33082	0.0124141	0.0392075	4.75898	2.25065
962	2-(1-hydroxy-1-methyl-ethyl)-4-methoxy-7-[[(2R,3R,4S,5S,6R)-3,4,5-trihydroxy-6-(hydroxymethyl)tetrahydropyran-2-yl]oxymethyl]-2,3-dihydrofuro[3,2-g]chromen-5-one	3.76	level1			467.159	253	NEG	C22H28O11		80681-45-4		Polyketides	Chromanes	Chromones	XIUVHOSBSDYXRG-RZMKGNTASA-N	0.234737	0.253318	0.21657	0.234875	0.377246	0.393425	0.371557	0.380743	1.3163	0.000305214	0.00330737	1.62104	0.696923
963	(2R,3R,4S,5S,6R)-2-benzyloxy-6-[[(2S,3R,4S,5S)-3,4,5-trihydroxytetrahydropyran-2-yl]oxymethyl]tetrahydropyran-3,4,5-triol	3.76	level1			401.145	250.3	NEG	C18H26O10							WOGBNISMMIOPAZ-WSRGYXCDSA-N	0.905509	0.891423	0.890925	0.895953	0.311935	0.297548	0.310136	0.30654	1.3417	9.32815e-08	9.98726e-05	0.342139	-1.54735
964	2-Ethyl-2-hydroxybutyric acid	3.76	level1			131.071	136.8	NEG	C6H12O3	HMDB0001975	3639-21-2		Fatty acids	Fatty Acids and Conjugates	Hydroxy fatty acids	LXVSANCQXSSLPA-UHFFFAOYSA-N	0.548555	0.62894	0.569925	0.582473	0.128353	0.259398	0.184221	0.190657	1.26502	0.000952916	0.00678075	0.327324	-1.61121
965	Thiamine	3.76	level1			265.111	379.8	POS	C12H17N4OS	HMDB0000235	59-43-8	C00378	Alkaloids	Nicotinic acid alkaloids	Pyridine alkaloids	JZRWCGZRTZMZEH-UHFFFAOYSA-N	0.645184	0.640405	0.663636	0.649742	0.818321	0.802811	0.820427	0.813853	1.33379	5.32179e-05	0.00125778	1.25258	0.324902
967	Nicotinamide N-oxide	3.76	level1			139.05	133.8	POS	C6H6N2O2	HMDB0002730	1986-81-8		Alkaloids	Peptide alkaloids		USSFUVKEHXDAPM-UHFFFAOYSA-N	0.0351566	0.0373308	0.0373062	0.0365979	0.0148448	0.0144512	0.0130616	0.0141192	1.33697	1.53278e-05	0.000675382	0.385793	-1.3741
969	17-[5-hydroxy-6-(1-hydroxy-1-methyl-ethyl)tetrahydropyran-3-yl]-4,4,10,13,14-pentamethyl-1,2,5,6,9,11,12,15,16,17-decahydrocyclopenta[a]phenanthren-3-one	3.75	level1			471.347	495.8	NEG	C30H48O4				Terpenoids	Triterpenoids	Lanostane, Tirucallane and Euphane triterpenoids	RNETYSXHFSDFMM-UHFFFAOYSA-N	0.0239093	0.0242926	0.0236856	0.0239625	0.281988	0.235568	0.300507	0.272688	1.3401	0.00597269	0.0232941	11.3798	3.5084
975	Sph(d18:2)	3.75	level1			298.273	458.7	POS	C18H35NO2	HMDB0242112	25696-03-1		Fatty acids	Sphingolipids	Sphingoid bases	KWDXKYNWAKMLKK-YQDZIVAPSA-N	0.0568056	0.0625399	0.0415324	0.053626	0.0184277	0.0295111	0.0222705	0.0234031	1.22818	0.0128466	0.0401998	0.436414	-1.19623
976	Felbinac	3.75	level1			211.076	424.6	NEG	C14H12O2				Shikimates and Phenylpropanoids	Terphenyls	p-Terphenyls	QRZAKQDHEVVFRX-UHFFFAOYSA-N	0.0357284	0.0389103	0.03711	0.0372496	0.0713923	0.0922709	0.0727366	0.0788	1.30677	0.0236354	0.062684	2.11546	1.08097
977	(2R,6R)-2-methyl-4-oxo-6-[(3S,5R,7S,10S,13R,14R,15S,17R)-3,7,15-trihydroxy-4,4,10,13,14-pentamethyl-11-oxo-1,2,3,5,6,7,12,15,16,17-decahydrocyclopenta[a]phenanthren-17-yl]heptanoic acid	3.75	level1			517.317	364.8	NEG	C30H46O7		103773-62-2		Terpenoids	Triterpenoids	Lanostane, Tirucallane and Euphane triterpenoids	RERVSJVGWKIGTJ-RQLZKMEDSA-N	0.00309721	0.00417204	0.00389013	0.00371979	0.0294341	0.0234783	0.037825	0.0302458	1.32571	0.0231825	0.0618103	8.13104	3.02344
983	[4-[(2S,3R,4S,5S,6R)-3,4,5-trihydroxy-6-(hydroxymethyl)tetrahydropyran-2-yl]oxyphenyl]methyl 4-hydroxybenzoate	3.75	level1			405.119	255.2	NEG	C20H22O9				Shikimates and Phenylpropanoids	Phenolic acids (C6-C1)	Simple phenolic acids	VKSWFQCTDQBTII-BFMVXSJESA-N	0.0522324	0.0561227	0.0494091	0.0525881	0.123557	0.123641	0.124952	0.12405	1.3374	3.64695e-06	0.000354218	2.3589	1.23811
984	(2R,3S,4S,5R,6R)-2-(hydroxymethyl)-6-[[(2R,3S,4S,5R,6S)-3,4,5-trihydroxy-6-(3-hydroxy-5-methyl-phenoxy)tetrahydropyran-2-yl]methoxy]tetrahydropyran-3,4,5-triol	3.75	level1			447.151	225.7	NEG	C19H28O12		164991-86-0		Polyketides			XZPNBJLXZMBECP-SKYGPZSASA-N	0.432633	0.41564	0.435407	0.427893	0.0903402	0.0830176	0.0799386	0.0844321	1.34073	9.78218e-07	0.00021989	0.197321	-2.34139
988	Pyridoxamine	3.75	level1			169.097	323.5	POS	C8H12N2O2	HMDB0001431	85-87-0	C00534	Alkaloids	Nicotinic acid alkaloids	Pyridine alkaloids	NHZMQXZHNVQTQA-UHFFFAOYSA-N	0.00281243	0.00262567	0.0062488	0.00389563	0.012407	0.0159492	0.0145394	0.0142985	1.23749	0.0026554	0.0133686	3.6704	1.87594
989	Pivagabine	3.75	level1			186.113	234.2	NEG	C9H17NO3	HMDB0246575	69542-93-4	D07342	Fatty acids	Fatty Acids and Conjugates	Branched fatty acids	SRPNQDXRVRCTNK-UHFFFAOYSA-N	0.0284751	0.0331743	0.0296688	0.0304394	0.0238418	0.0269173	0.0226653	0.0244748	1.14002	0.0346594	0.0833716	0.80405	-0.314643
991	12-Hydroxystearic acid	3.75	level1			281.248	33.5	NEG	C18H36O3	HMDB0061706	106-14-9		Fatty acids	Octadecanoids	Other Octadecanoids	ULQISTXYYBZJSJ-UHFFFAOYSA-N	0.185965	0.211456	0.183224	0.193548	0.12948	0.0694159	0.133405	0.110767	1.08379	0.021444	0.0582944	0.572297	-0.805163
992	1-Caffeoylquinic acid	3.74	level1			353.088	235.2	NEG	C16H18O9		1241-87-8		Shikimates and Phenylpropanoids	Phenylpropanoids (C6-C3)	Cinnamic acids and derivatives	GWTUHAXUUFROTF-DUXPYHPUSA-N	0.13038	0.132845	0.111517	0.124914	0.0491132	0.0578628	0.0590706	0.0553489	1.317	0.000725096	0.0056832	0.443095	-1.17431
995	Phenylpyruvic acid	3.74	level1			163.04	245.9	NEG	C9H8O3	HMDB0000205	156-06-9	C00166	Shikimates and Phenylpropanoids	Phenylpropanoids (C6-C3)	Cinnamic acids and derivatives	BTNMPGBKDVTSJY-UHFFFAOYSA-N	0.217585	0.230659	0.225849	0.224698	0.15073	0.156533	0.155811	0.154358	1.33492	7.6752e-05	0.00152616	0.686957	-0.541709
998	2-Phenyllactic acid	3.74	level1			165.055	284.9	NEG	C9H10O3	HMDB0142137	515-30-0		Shikimates and Phenylpropanoids			NWCHELUCVWSRRS-UHFFFAOYSA-N	0.235199	0.237817	0.24009	0.237702	0.109356	0.109094	0.109575	0.109342	1.34233	0.000105362	0.0018154	0.459994	-1.12031
999	Hesperetin 7-O-neohesperidoside	3.74	level1			591.165	279.9	NEG	C28H34O15		13241-33-3	C09806	Shikimates and Phenylpropanoids	Flavonoids	Flavanones	ARGKVCXINMKCAZ-UZRWAPQLSA-N	0.194603	0.219477	0.208025	0.207368	0.00531843	0.00573007	0.0069699	0.00600613	1.34093	0.00121429	0.00794298	0.0289636	-5.10961
1001	PC(38:1)	3.74	level1			816.652	614.9	POS	C46H90NO8P							PTIPMXWQZWSDTJ-ALNNFZMXSA-N	0.00382502	0.00461031	0.00711418	0.00518317	0.0175657	0.0094348	0.0142951	0.0137652	1.18616	0.0285705	0.0721554	2.65574	1.40912
1003	Cyclohexanecarboxylic acid	3.74	level1			127.076	385.6	NEG	C7H12O2				Amino acids and Peptides	Small peptides	Aminoacids	NZNMSOFKMUBTKW-UHFFFAOYSA-N	0.009239	0.0107618	0.0106183	0.0102064	0.0200978	0.0184578	0.0177574	0.018771	1.31581	0.000537233	0.00470556	1.83915	0.879039
1005	(2R,3R,4S,5S,6R)-2-[(2E)-6-hydroxy-2,6-dimethyl-octa-2,7-dienoxy]-6-[[(2S,3R,4S,5S)-3,4,5-trihydroxytetrahydropyran-2-yl]oxymethyl]tetrahydropyran-3,4,5-triol	3.74	level1			445.208	273	NEG	C21H36O11				Terpenoids	Monoterpenoids	Acyclic monoterpenoids	MACZNRHYPPXPRL-ORGBDTRNSA-N	1.01915	1.19516	1.11007	1.10813	0.171903	0.168398	0.159009	0.166437	1.34065	0.00276841	0.0137371	0.150196	-2.73508
1006	1,7,7-trimethyl-5-[(2R,3R,4S,5S,6R)-3,4,5-trihydroxy-6-(hydroxymethyl)oxan-2-yl]oxybicyclo[2.2.1]heptan-2-one	3.74	level1			311.15	264.9	NEG	C16H26O7				Terpenoids	Monoterpenoids	Camphane monoterpenoids	YQIHQJXXKNXTBN-IOZQKGQLSA-N	0.100181	0.111063	0.0976433	0.102963	0.0671084	0.0760293	0.0636457	0.0689278	1.27689	0.00352932	0.0161765	0.669445	-0.578962
1007	2-Hydroxymethyl benzoic acid	3.74	level1			151.038	256.2	NEG	C8H8O3	HMDB0032594	612-20-4	C10804	Shikimates and Phenylpropanoids	Phenolic acids (C6-C1)	Simple phenolic acids	MGMNPSAERQZUIM-UHFFFAOYSA-N	0.029149	0.0321411	0.029894	0.0303947	0.0230913	0.0243186	0.0210552	0.0228217	1.26528	0.00443994	0.0189477	0.750846	-0.413412
1010	Acetylproline	3.74	level1			156.067	62.2	NEG	C7H11NO3	HMDB0242126	1074-79-9		Amino acids and Peptides	Small peptides	Dipeptides	GNMSLDIYJOSUSW-UHFFFAOYSA-N	0.143988	0.202318	0.165685	0.170664	0.0538447	0.084162	0.0544177	0.0641415	1.26573	0.00571426	0.0225897	0.375836	-1.41183
1011	PC(P-34:0)	3.74	level1			728.585	575.5	POS	C42H84NO7P	HMDB0011208			Fatty acids	Glycerophospholipids	Glycerophosphocholines	ZGOGLUJRGBOVEK-IIKIFWEUSA-N	0.0302286	0.0272512	0.0281301	0.0285366	0.00768512	0.00571729	0.0139463	0.00911623	1.22994	0.0018021	0.010323	0.319457	-1.64631
1012	pyridine-2-carboxamide	3.74	level1			123.055	61.1	POS	C6H6N2O		1452-77-3	C01950	Alkaloids	Nicotinic acid alkaloids	Pyridine alkaloids	IBBMAWULFFBRKK-UHFFFAOYSA-N	0.0382079	0.0391289	0.0385047	0.0386138	0.0294063	0.026505	0.0330101	0.0296405	1.21216	0.0388524	0.0909451	0.767612	-0.381551
1013	Glycine	3.74	level1			74.0247	415.7	NEG	C2H5NO2	HMDB0000123	56-40-6	C00037	Amino acids and Peptides	Small peptides	Aminoacids	DHMQDGOQFOQNFH-UHFFFAOYSA-N	0.0567574	0.0581951	0.0559857	0.0569794	0.04999	0.0519811	0.0448746	0.0489486	1.15623	0.0221917	0.0598187	0.859057	-0.219174
1014	(2S,3R,4R,5R,6S)-2-[(2R,3S,4S,5R,6R)-4-hydroxy-6-[(4S,5'R,6R,7S,8R,9S,10R,13R,16S)-10-hydroxy-5'-(hydroxymethyl)-7,9,13-trimethylspiro[5-oxapentacyclo[10.8.0.02,9.04,8.013,18]icos-18-ene-6,2'-piperidine]-16-yl]oxy-2-(hydroxymethyl)-5-[(2S,3R,4R,5R,6S)-3,4,5-trihydroxy-6-methyloxan-2-yl]oxyoxan-3-yl]oxy-6-methyloxane-3,4,5-triol	3.74	level1			900.491	383.8	POS	C45H73NO17				Alkaloids	Pseudoalkaloids	Steroidal alkaloids	WKQPSCAWSPODQF-ZNSBWVGZSA-N	0.0233541	0.0239349	0.0269451	0.0247447	0.00455507	0.0100807	0.0124813	0.00903902	1.16843	0.00377243	0.0169282	0.365291	-1.45288
1015	Pinoresinol Diglucoside	3.74	level1			681.237	277	NEG	C32H42O16		63902-38-5		Shikimates and Phenylpropanoids	Lignans	Furofuranoid lignans	ZJSJQWDXAYNLNS-FUPWJLLWSA-N	0.0150574	0.0151426	0.0165708	0.0155903	0.0439123	0.04603	0.0462566	0.0453997	1.33927	4.81348e-06	0.000404341	2.91205	1.54204
1016	Ganoderic acid A	3.74	level1			497.288	176.8	NEG	C30H44O7		81907-62-2		Terpenoids	Triterpenoids	Lanostane, Tirucallane and Euphane triterpenoids	DYOKDAQBNHPJFD-JNTBEZBXSA-N	0.149639	0.162656	0.15331	0.155202	0.0705497	0.0696547	0.0389331	0.0597125	1.24685	0.00100057	0.00698884	0.384741	-1.37804
1019	Magnolioside	3.73	level1			353.088	235.2	NEG	C16H18O9		121-34-6		Shikimates and Phenylpropanoids	Coumarins	Simple coumarins	WBAVLTNIRYDCPM-YMILTQATSA-N	0.13038	0.132845	0.111517	0.124914	0.0491132	0.0578628	0.0590706	0.0553489	1.317	0.000725096	0.0056832	0.443095	-1.17431
1022	N-Phenylacetamide	3.73	level1			136.075	251.1	POS	C8H9NO	HMDB0001250	55576-55-1	C07565	Alkaloids	Anthranilic acid alkaloids		FZERHIULMFGESH-UHFFFAOYSA-N	0.0252945	0.0286484	0.026977	0.0269733	0.0403084	0.0499482	0.0380058	0.0427541	1.24584	0.0140254	0.04281	1.58505	0.66453
1023	3-Methyl-1H-pyrazole-4-carbaldehyde	3.73	level1			109.041	69.2	NEG	C5H6N2O		112758-40-4		Alkaloids			NWDMGTFNIOCVDU-UHFFFAOYSA-N	0.233028	0.180978	0.224023	0.212676	0.0972576	0.0633403	0.10641	0.0890027	1.24464	0.00396181	0.0175091	0.418489	-1.25674
1026	8-Hydroxycarbostyril	3.73	level1			160.04	316.6	NEG	C9H7NO2	HMDB0240311	15450-76-7	C06342	Alkaloids	Tryptophan alkaloids	Quinoline alkaloids	ZXZKYYHTWHJHFT-UHFFFAOYSA-N	0.0241467	0.0255273	0.0317284	0.0271341	0.0160038	0.0169324	0.0181234	0.0170199	1.25041	0.0137467	0.0422023	0.62725	-0.672888
1027	5-Phenylisoxazol-3-ol	3.73	level1			160.04	316.6	NEG	C9H7NO2		939-05-9		Shikimates and Phenylpropanoids			AFVFIJAYAFTQRB-UHFFFAOYSA-N	0.0241467	0.0255273	0.0317284	0.0271341	0.0160038	0.0169324	0.0181234	0.0170199	1.25041	0.0137467	0.0422023	0.62725	-0.672888
1029	(1S,2Z,10R)-11,11-dimethyl-7-methylidene-6-oxobicyclo[8.1.0]undec-2-ene-3-carboxylic acid	3.73	level1			247.134	372.1	NEG	C15H20O3				Terpenoids	Sesquiterpenoids	Bicyclogermacrane sesquiterpenoids	JSWXKFCFVRCREF-ZFPPVFKBSA-N	0.0423435	0.0566487	0.0525524	0.0505148	0.0131846	0.0143032	0.0102672	0.012585	1.31948	0.00101315	0.00704589	0.249135	-2.005
1032	[3-[2,3-dihydroxypropoxy(hydroxy)phosphoryl]oxy-2-hydroxypropyl] 14-methylpentadecanoate	3.73	level1			483.272	551.1	NEG	C22H45O9P				Fatty acids	Glycerophospholipids	Glycerophosphoglycerols	VJBFQKCFAQJCQF-UHFFFAOYSA-N	0.312934	0.309978	0.37381	0.332241	0.125492	0.145588	0.172882	0.147987	1.29596	0.00178607	0.010265	0.445422	-1.16676
1034	methyl (3S)-3-acetoxy-3-[(1R,2R,5R,6R,10S,11S,14S)-11-(3-furyl)-5-(1-hydroxy-1-methyl-ethyl)-2,6,10-trimethyl-3,13-dioxo-12,15-dioxatetracyclo[8.5.0.01,14.02,7]pentadecan-6-yl]propanoate	3.73	level1			545.239	419.6	NEG	C29H38O10				Terpenoids	Triterpenoids	Limonoids	CDPVCJRXJYQLCD-RWRZWDSKSA-N	0.0186573	0.0234976	0.0250543	0.022403	0.0289078	0.0372332	0.0301664	0.0321024	1.11805	0.0397705	0.0925317	1.43295	0.518989
1036	(2E)-2-hexylidene-3-methyl-butanedioic acid	3.73	level1			213.113	367.5	NEG	C11H18O4				Fatty acids	Fatty Acids and Conjugates	Branched fatty acids	YTUQECDNJQCQAE-VQHVLOKHSA-N	0.0679549	0.0875799	0.0944786	0.0833378	0.381215	0.35488	0.366609	0.367568	1.32949	1.33591e-05	0.000639611	4.41058	2.14097
1037	4-Chromanone	3.73	level1			147.045	357.2	NEG	C9H8O2		491-37-2		Shikimates and Phenylpropanoids	Isoflavonoids		MSTDXOZUKAQDRL-UHFFFAOYSA-N	0.36182	0.335782	0.370658	0.356087	0.127373	0.121751	0.111516	0.120213	1.33679	3.28084e-05	0.000982841	0.337596	-1.56663
1039	(1S,4aS,7S,7aR)-7-methyl-1-[(2S,3R,4S,5S,6R)-3,4,5-trihydroxy-6-(hydroxymethyl)tetrahydropyran-2-yl]oxy-1,4a,5,6,7,7a-hexahydrocyclopenta[c]pyran-4-carboxylic acid	3.73	level1			359.133	287.9	NEG	C16H24O9		22487-36-1	C11636	Terpenoids	Monoterpenoids	Iridoids monoterpenoids	DSXFHNSGLYXPNG-YDYVGBNJSA-N	0.379982	0.375835	0.369414	0.375077	0.519961	0.575492	0.519195	0.538216	1.31738	0.000988731	0.00693544	1.43495	0.520998
1040	(2R,3S,4S,5R,6S)-2-[(3,4,5-trihydroxytetrahydropyran-2-yl)oxymethyl]-6-(3,4,5-trimethoxyphenoxy)tetrahydropyran-3,4,5-triol	3.73	level1			477.161	244.9	NEG	C20H30O13							GGIDHIBVLYVTAU-QGPLIYBISA-N	0.26234	0.215742	0.258013	0.245365	0.116584	0.0960568	0.0310538	0.0812314	1.1147	0.00527355	0.0213546	0.331064	-1.59482
1041	14-methyl-7,9,20,22-tetraoxa-14-azapentacyclo[15.7.0.04,12.06,10.019,23]tetracosa-1(24),4,6(10),11,17,19(23)-hexaen-2-one	3.73	level1			354.137	224.8	POS	C20H19NO5		24240-05-9		Alkaloids	Tyrosine alkaloids	Protopine alkaloids	ZAALQOFZFANFTF-UHFFFAOYSA-N	0.0130761	0.0147284	0.0122169	0.0133405	0.00846695	0.00852106	0.0104176	0.00913519	1.22046	0.0126018	0.0396352	0.684774	-0.5463
1044	N-Acetylvaline	3.73	level1			158.082	160.6	NEG	C7H13NO3	HMDB0011757	96-81-1		Amino acids and Peptides	Small peptides	Dipeptides	IHYJTAOFMMMOPX-LURJTMIESA-N	0.29793	0.304722	0.246005	0.282886	0.367652	0.425554	0.389046	0.394084	1.21045	0.0114085	0.036886	1.39309	0.478284
1045	PC(39:5)	3.73	level1			822.611	620.2	POS	C47H84NO8P							JKGGTQPSLLAHHY-UQWXQCBASA-N	0.00828313	0.00449271	0.00784255	0.0068728	0.0197069	0.0146936	0.0153546	0.016585	1.21428	0.00795988	0.0285439	2.41314	1.27091
1046	Atractyloside A	3.73	level1			429.212	308.2	NEG	C21H36O10		126054-77-1	C17858	Terpenoids	Sesquiterpenoids	Guaiane sesquiterpenoids	QNBLVYVBWDIWDM-BSLJOXIBSA-N	0.104095	0.10701	0.103345	0.104817	0.224497	0.225654	0.227737	0.225963	1.34176	1.28439e-07	0.00010863	2.15579	1.10822
1047	NP-007332	3.73	level1			536.415	272.8	POS	C28H57NO8							NFFKSNQJUKRBNY-UHFFFAOYSA-N	2.18929e-06	2.20454e-06	2.21181e-06	2.20188e-06	2.72839e-06	2.74836e-06	2.62293e-06	2.69989e-06	1.32825	0.000227201	0.00277667	1.22618	0.294166
1049	2-Aminonicotinic acid	3.73	level1			137.035	194.3	NEG	C6H6N2O2	HMDB0061680	5345-47-1		Amino acids and Peptides	Small peptides	Aminoacids	KPIVDNYJNOPGBE-UHFFFAOYSA-N	0.115284	0.0958228	0.0681486	0.0930851	0.30438	0.370589	0.32551	0.333493	1.30186	0.000543872	0.00473824	3.58267	1.84103
1053	3-Hydroxyvaleric acid	3.72	level1			117.056	110.7	NEG	C5H10O3	HMDB0000531	10237-77-1		Fatty acids	Fatty Acids and Conjugates	Hydroxy fatty acids	REKYPYSUBKSCAT-UHFFFAOYSA-N	0.103498	0.124267	0.111705	0.113157	0.0768637	0.0619112	0.065539	0.0681046	1.27543	0.00392941	0.0174166	0.601862	-0.732495
1054	Orthosphenic acid	3.72	level1			487.342	76.6	NEG	C30H48O5		86632-20-4		Terpenoids	Triterpenoids	Friedelane triterpenoids	JPAXVSRGFJVPEU-GGQQGAMYSA-N	0.095256	0.126239	0.111251	0.110915	1.70271	1.70036	1.88324	1.7621	1.3394	0.0010911	0.00737715	15.8869	3.98977
1055	(E)-3-(2,5-dihydroxyphenyl)prop-2-enoic acid	3.72	level1			179.035	263.4	NEG	C9H8O4		38489-67-7|636-01-1		Shikimates and Phenylpropanoids	Phenylpropanoids (C6-C3)	Cinnamic acids and derivatives	JXIPYOZBOMUUCA-DAFODLJHSA-N	0.174486	0.155348	0.225252	0.185029	0.0439934	0.0449314	0.0505876	0.0465042	1.32314	0.0210678	0.0575427	0.251335	-1.99232
1057	DL-m-Tyrosine	3.72	level1			182.081	74.5	POS	C9H11NO3		775-06-4		Amino acids and Peptides	Small peptides	Aminoacids	JZKXXXDKRQWDET-UHFFFAOYSA-N	0.135445	0.0965794	0.129586	0.120537	0.0204533	0.0201537	0.017631	0.0194127	1.33115	0.0136352	0.0419488	0.161052	-2.6344
1058	1-(4-hydroxy-3,5-dimethoxy-phenyl)propan-1-one	3.72	level1			209.082	269.3	NEG	C11H14O4		5650-43-1					CXCPJZXJNRBTGF-UHFFFAOYSA-N	0.0421398	0.0334575	0.0370655	0.0375543	0.02682	0.0309349	0.0293738	0.0290429	1.14001	0.037973	0.0893711	0.773358	-0.370792
1059	(2R,3R,4S,5S,6R)-2-benzyloxy-6-[[(2S,3R,4S,5R)-3,4,5-trihydroxytetrahydropyran-2-yl]oxymethyl]tetrahydropyran-3,4,5-triol	3.72	level1			401.144	233.6	NEG	C18H26O10		130622-31-0					WOGBNISMMIOPAZ-NWQIESHVSA-N	0.163066	0.149713	0.160993	0.157924	0.0549819	0.0541059	0.0582468	0.0557782	1.33923	1.92489e-05	0.000753936	0.353196	-1.50146
1061	[(3aR,4R,5R,6E,9Z,11aR)-4-hydroxy-6,10-dimethyl-3-methylene-2,8-dioxo-4,5,11,11a-tetrahydro-3aH-cyclodeca[b]furan-5-yl] (Z)-2-methylbut-2-enoate	3.72	level1			359.15	306.1	NEG	C20H24O6				Terpenoids	Sesquiterpenoids	Germacrane sesquiterpenoids	BIHIEAXOTSXYAE-NAGHFMSUSA-N	0.0180868	0.0248295	0.0202028	0.0210397	0.0502564	0.052386	0.0519949	0.0515458	1.31353	0.000129544	0.00203586	2.44993	1.29274
1062	1-(2-hydroxy-5-methoxy-phenyl)ethanone	3.72	level1			165.055	284.9	NEG	C9H10O3		705-15-7		Shikimates and Phenylpropanoids			MLIBGOFSXXWRIY-UHFFFAOYSA-N	0.235199	0.237817	0.24009	0.237702	0.109356	0.109094	0.109575	0.109342	1.34233	0.000105362	0.0018154	0.459994	-1.12031
1063	(4-hydroxyphenyl) acetate	3.72	level1			151.038	256.2	NEG	C8H8O3		3233-32-7	C13636	Shikimates and Phenylpropanoids	Phenolic acids (C6-C1)	Simple phenolic acids	HBMCQTHGYMTCOF-UHFFFAOYSA-N	0.029149	0.0321411	0.029894	0.0303947	0.0230913	0.0243186	0.0210552	0.0228217	1.26528	0.00443994	0.0189477	0.750846	-0.413412
1065	Pregnanediol 3-O-glucuronide	3.72	level1			495.297	350.6	NEG	C27H44O8	HMDB0010318	1852-49-9	C03033	Terpenoids	Steroids	Pregnane steroids	ZFFFJLDTCLJDHL-JQYCEVDMSA-N	0.0349119	0.0390956	0.0377181	0.0372419	0.0520803	0.0523272	0.0487727	0.0510601	1.29956	0.001196	0.007857	1.37104	0.455269
1066	Salicylamide	3.72	level1			118.03	306	NEG	C7H7NO2	HMDB0015687	65-45-2	D01811	Alkaloids	Peptide alkaloids	Simple amide alkaloids	SKZKKFZAGNVIMN-UHFFFAOYSA-N	0.00591593	0.00638263	0.004772	0.00569018	0.0138832	0.0110955	0.011992	0.0123236	1.2931	0.00221983	0.0118437	2.16576	1.11487
1067	2-(1,5,8-trihydroxy-4a,8-dimethyl-1,2,3,4,5,6,7,8a-octahydronaphthalen-2-yl)prop-2-enoic acid	3.72	level1			283.155	279	NEG	C15H24O5				Terpenoids	Sesquiterpenoids	Eudesmane sesquiterpenoids	VSZGUTBXIPJUAN-UHFFFAOYSA-N	0.664909	0.79768	0.77399	0.745526	0.115492	0.113927	0.101887	0.110435	1.33924	0.00379755	0.0170067	0.148131	-2.75506
1074	(3R,4S)-4,6,8-trihydroxy-7-methoxy-3-methyl-isochroman-1-one	3.72	level1			239.059	32.7	NEG	C11H12O6		153765-43-6		Shikimates and Phenylpropanoids	Coumarins	Isocoumarins	ZLLQQKITWRWKTD-SPGJFGJESA-N	0.402212	0.418424	0.61303	0.477889	0.665012	0.645942	0.749704	0.686886	1.07332	0.0492255	0.108824	1.43734	0.523397
1076	2-[(2-amino-3-methyl-butanoyl)amino]-3-phenyl-propanoic acid	3.71	level1			263.14	225.2	NEG	C14H20N2O3		75946-40-6		Amino acids and Peptides	Small peptides	Dipeptides	GJNDXQBALKCYSZ-UHFFFAOYSA-N	0.44703	0.477788	0.435953	0.45359	0.338857	0.348461	0.319167	0.335495	1.3028	0.00147824	0.00905799	0.739643	-0.435099
1077	3-Methoxyphenylacetic acid	3.71	level1			165.056	272.4	NEG	C9H10O3	HMDB0059969	1798-09-0		Shikimates and Phenylpropanoids	Phenolic acids (C6-C1)	Simple phenolic acids	LEGPZHPSIPPYIO-UHFFFAOYSA-N	0.167214	0.198754	0.19037	0.185446	0.0357349	0.039621	0.0351005	0.0368188	1.33866	0.00339375	0.0157494	0.198542	-2.33248
1079	(1aS,3aS,6aS,6bR)-2-formyl-5,5,6b-trimethyl-3a,4,6,6a-tetrahydro-1H-cyclopropa[e]indene-1a-carboxylic acid	3.71	level1			247.134	372.1	NEG	C15H20O3				Terpenoids	Sesquiterpenoids	Marasmane sesquiterpenoids	LYCAYVFJYBYYTE-QFEPDWEUSA-N	0.0423435	0.0566487	0.0525524	0.0505148	0.0131846	0.0143032	0.0102672	0.012585	1.31948	0.00101315	0.00704589	0.249135	-2.005
1080	(1S,8R,9R)-8-hydroxy-4-isopropylidene-10-oxatricyclo[7.2.1.01,5]dodecane-8-carboxylic acid	3.71	level1			265.147	25.2	NEG	C15H22O4		67309-95-9		Terpenoids	Sesquiterpenoids	Daucane sesquiterpenoids	IOYVXXQKVQKQIG-ZJPTYJIISA-N	32.4591	36.2229	32.8886	33.8568	42.8024	38.6868	37.7131	39.7341	1.12569	0.0400881	0.0930906	1.17359	0.230929
1081	(1S,4aS,7R,7aR)-7-methyl-1-[(2S,3R,4S,5S,6R)-3,4,5-trihydroxy-6-(hydroxymethyl)tetrahydropyran-2-yl]oxy-1,4a,5,6,7,7a-hexahydrocyclopenta[c]pyran-4-carboxylic acid	3.71	level1			359.133	287.9	NEG	C16H24O9		88668-99-9	C11649	Terpenoids	Monoterpenoids	Iridoids monoterpenoids	DSXFHNSGLYXPNG-PKUPRILXSA-N	0.379982	0.375835	0.369414	0.375077	0.519961	0.575492	0.519195	0.538216	1.31738	0.000988731	0.00693544	1.43495	0.520998
1082	2-Methylbutyrylglycine	3.71	level1			158.082	160.6	NEG	C7H13NO3	HMDB0000339	52320-67-9		Amino acids and Peptides	Small peptides	Dipeptides	HOACIBQKYRHBOW-UHFFFAOYSA-N	0.29793	0.304722	0.246005	0.282886	0.367652	0.425554	0.389046	0.394084	1.21045	0.0114085	0.036886	1.39309	0.478284
1085	methyl 8-[(1S,5R)-4-oxo-5-[(Z)-pent-2-enyl]cyclopent-2-en-1-yl]octanoate	3.71	level1			307.226	452.8	POS	C19H30O3				Fatty acids	Octadecanoids	12-oxophytodienoic acid metabolites	AXDNONFPXLVMOY-HBKWROQRSA-N	0.0148452	0.0251457	0.0338551	0.0246154	0.0497398	0.0698835	0.0456825	0.0551019	1.12293	0.0303859	0.0755483	2.23852	1.16254
1087	Ala-Gly	3.71	level1			145.062	91.3	NEG	C5H10N2O3	HMDB0006899	687-69-4		Amino acids and Peptides	Small peptides	Aminoacids	CXISPYVYMQWFLE-VKHMYHEASA-N	0.0608487	0.0738661	0.090739	0.0751513	0.0389232	0.0340179	0.0565704	0.0431705	1.11349	0.0441949	0.10033	0.574448	-0.799752
1089	N6,N6,N6-Trimethyllysine	3.71	level1			189.159	567.9	POS	C9H20N2O2	HMDB0001325	19253-88-4	C03793	Amino acids and Peptides	Small peptides	Aminoacids	MXNRLFUSFKVQSK-QMMMGPOBSA-N	1.85894	1.54514	1.41889	1.60766	2.61025	2.47795	3.06239	2.71687	1.25342	0.00727763	0.0267655	1.68995	0.756983
1091	Glucosamine 1-phosphate	3.71	level1			258.038	435.8	NEG	C6H14NO8P	HMDB0001109	2152-75-2	C06156	Carbohydrates	Aminosugars and aminoglycosides	Aminosugars	YMJBYRVFGYXULK-QZABAPFNSA-N	0.0160207	0.0177196	0.0159454	0.0165619	0.0318616	0.0312939	0.0336518	0.0322691	1.33228	6.8065e-05	0.00143256	1.94839	0.962285
1092	Glucose	3.71	level1			203.052	275.5	POS	C6H12O6	HMDB0003345	492-62-6	C00267	Carbohydrates	Saccharides	Monosaccharides	WQZGKKKJIJFFOK-DVKNGEFBSA-N	0.0136977	0.0134521	0.0147332	0.013961	0.0701556	0.0626637	0.0725874	0.0684689	1.33957	0.0026043	0.0131913	4.90429	2.29404
1093	PC(18:1)	3.71	level1			518.323	214.1	POS	C26H50NO8P		56391-91-4					GWVZWQQVJIDOHB-KMAVEXBHSA-N	0.088821	0.0871795	0.0909331	0.0889778	0.0791825	0.0808278	0.0777338	0.079248	1.29069	0.00229331	0.0121126	0.890649	-0.167071
1094	(3S,3'R,3'aS,6'S,6aS,6bS,7'aR,9R,11aS,11bR)-3',6',10,11b-tetramethyl-3-[(2R,3R,4S,5S,6R)-3,4,5-trihydroxy-6-(hydroxymethyl)tetrahydropyran-2-yl]oxy-spiro[1,2,3,4,6,6a,6b,7,8,11a-decahydrobenzo[a]fluorene-9,2'-3a,4,5,6,7,7a-hexahydro-3H-furo[3,2-b]pyridine]-11-one	3.71	level1			588.351	211.5	POS	C33H49NO8		36069-05-3		Alkaloids	Pseudoalkaloids	Steroidal alkaloids	HYDDDNUKNMMWBD-VPLHBGEQSA-N	0.0589829	0.0612454	0.0644143	0.0615475	0.00538253	0.0131154	0.00672554	0.00840781	1.29998	4.92911e-05	0.00120979	0.136607	-2.8719
1095	2,6-dihydroxy-7-methoxy-1,1,4a-trimethyl-3,4,10,10a-tetrahydro-2H-phenanthren-9-one	3.71	level1			303.16	70	NEG	C18H24O4				Terpenoids	Diterpenoids	Podocarpane diterpenoids	JKTSDLANZJEZMK-UHFFFAOYSA-N	0.0356573	0.0379592	0.0297748	0.0344638	0.162648	0.131801	0.122006	0.138818	1.3256	0.00112058	0.00751811	4.02795	2.01005
1098	2',4',6'-Trihydroxyacetophenone	3.7	level1			167.035	257.7	NEG	C8H8O4	HMDB0029644	480-66-0	C21895	Polyketides	Phloroglucinols	Acyl phloroglucinols	XLEYFDVVXLMULC-UHFFFAOYSA-N	2.25461	2.31926	2.34928	2.30772	6.44376	6.63807	6.29065	6.45749	1.34126	2.38742e-06	0.000306237	2.79822	1.48451
1099	Hesperidin	3.7	level1			591.165	279.9	NEG	C28H34O15		520-26-3	C09755|D01038	Shikimates and Phenylpropanoids	Flavonoids	Flavanones	QUQPHWDTPGMPEX-QJBIFVCTSA-N	0.194603	0.219477	0.208025	0.207368	0.00531843	0.00573007	0.0069699	0.00600613	1.34093	0.00121429	0.00794298	0.0289636	-5.10961
1100	2-hexyl-3-methylene-butanedioic acid	3.7	level1			213.113	367.5	NEG	C11H18O4		94513-51-6		Fatty acids	Fatty Acids and Conjugates	Dicarboxylic acids	HKMDCNSGDQBQLI-UHFFFAOYSA-N	0.0679549	0.0875799	0.0944786	0.0833378	0.381215	0.35488	0.366609	0.367568	1.32949	1.33591e-05	0.000639611	4.41058	2.14097
1101	Denticetic-acid	3.7	level1			197.154	489.4	NEG	C12H22O2	HMDB0000529	2430-94-6		Fatty acids	Fatty Acids and Conjugates	Unsaturated fatty acids	IJBFSOLHRKELLR-FPLPWBNLSA-N	0.0118289	0.0132432	0.0114951	0.0121891	0.00801693	0.0093748	0.00921808	0.00886994	1.24208	0.00842323	0.0297019	0.727697	-0.458591
1102	(2E,4E)-1-(2,4-dihydroxy-3,5-dimethyl-phenyl)hexa-2,4-dien-1-one	3.7	level1			231.102	398.6	NEG	C14H16O3		79950-85-9		Polyketides	Aromatic polyketides	Sorbicilinoids	RKKPUBAAIGFXOG-YTXTXJHMSA-N	0.0121653	0.015523	0.0136365	0.0137749	0.00913171	0.0114327	0.00958068	0.0100484	1.14259	0.0360381	0.0858933	0.729468	-0.455084
1103	4-(4-hydroxy-6-methoxy-7-methyl-3-oxo-1H-isobenzofuran-5-yl)-2-methyl-butanoic acid	3.7	level1			293.106	349.7	NEG	C15H18O6				Polyketides	Cyclic polyketides	Phthalide derivatives	QMNZQJIPOGEXDT-UHFFFAOYSA-N	0.0108649	0.0127309	0.0115669	0.0117209	0.0170336	0.0166381	0.0176147	0.0170955	1.2988	0.000936513	0.00670333	1.45855	0.544531
1106	2-(6-hydroxyhexyl)-3-methylene-butanedioic acid	3.7	level1			229.108	313.3	NEG	C11H18O5				Fatty acids	Fatty Acids and Conjugates	Dicarboxylic acids	DHVXMTMJTVCPBB-UHFFFAOYSA-N	0.046586	0.0551854	0.0459729	0.0492481	0.177106	0.1836	0.177573	0.179426	1.33643	3.63109e-06	0.000353776	3.64332	1.86525
1107	2-(5-hydroxyhexyl)-3-methylene-butanedioic acid	3.7	level1			229.108	313.3	NEG	C11H18O5				Fatty acids	Fatty Acids and Conjugates	Dicarboxylic acids	SPTZQYLKDFWPGO-UHFFFAOYSA-N	0.046586	0.0551854	0.0459729	0.0492481	0.177106	0.1836	0.177573	0.179426	1.33643	3.63109e-06	0.000353776	3.64332	1.86525
1109	Corydaldine (tautomeric structure 1)	3.7	level1			208.096	274.1	POS	C11H13NO3		493-49-2		Alkaloids	Pseudoalkaloids	Isoindole alkaloids	MQKFSXLBPPCAGR-UHFFFAOYSA-N	0.021857	0.0220883	0.0215033	0.0218162	0.0653538	0.0577376	0.0616367	0.061576	1.33931	0.00290265	0.0141696	2.8225	1.49697
1111	(2S)-2-amino-4-benzyloxy-4-oxo-butanoic acid	3.7	level1			206.081	257.1	POS	C11H13NO4		2177-63-1		Amino acids and Peptides	Small peptides	Aminoacids	VGALFAWDSNRXJK-VIFPVBQESA-N	0.0858705	0.085953	0.08511	0.0856445	0.074245	0.0755367	0.0698566	0.0732128	1.28444	0.0167177	0.0485943	0.854845	-0.226265
1112	Beiwutine	3.7	level1			648.3	252.1	POS	C33H45NO12		76918-93-9	C08663	Alkaloids	Pseudoalkaloids	Terpenoid alkaloids	GPTAWZLFSGYZGC-JDMPSTDXSA-N	0.0136143	0.0123202	0.0140645	0.013333	0.0730579	0.059558	0.0715511	0.0680557	1.33689	0.00547016	0.0219029	5.10429	2.35171
1113	4'-Hydroxyacetophenone	3.7	level1			137.059	224.2	POS	C8H8O2		99-93-4	C10700	Shikimates and Phenylpropanoids			TXFPEBPIARQUIG-UHFFFAOYSA-N	0.0178998	0.0141734	0.0154046	0.0158259	0.02255	0.0258451	0.0358801	0.0280917	1.17675	0.041908	0.0963023	1.77505	0.827857
1116	3-Methylglutarylcarnitine	3.7	level1			290.159	427.8	POS	C13H23NO6	HMDB0000552	102673-95-0		Fatty acids	Fatty esters	Fatty acyl carnitines	HFCPFJNSBPQJDP-UHFFFAOYSA-N	0.294977	0.249051	0.281145	0.275058	0.882878	0.809812	0.901292	0.86466	1.3356	4.54275e-05	0.00115979	3.14356	1.6524
1118	4-methoxy-6-[(E)-prop-1-enyl]pyran-2-one	3.69	level1			167.07	284.8	POS	C9H10O3				Polyketides	Cyclic polyketides	2-pyrone derivatives	NWPQSEVAIPWZJY-ONEGZZNKSA-N	0.0667486	0.0590568	0.0628352	0.0628802	0.0445075	0.0463627	0.0464547	0.045775	1.30448	0.00177254	0.0102162	0.727971	-0.458047
1119	2-Hydroxy-4-methoxybenzoic acid	3.69	level1			167.035	257.7	NEG	C8H8O4		2237-36-7		Shikimates and Phenylpropanoids	Phenolic acids (C6-C1)	Simple phenolic acids	MRIXVKKOHPQOFK-UHFFFAOYSA-N	2.25461	2.31926	2.34928	2.30772	6.44376	6.63807	6.29065	6.45749	1.34126	2.38742e-06	0.000306237	2.79822	1.48451
1121	N6-Acetyllysine	3.69	level1			187.109	96.5	NEG	C8H16N2O3	HMDB0000206	692-04-6	C02727	Amino acids and Peptides	Small peptides	Aminoacids	DTERQYGMUDWYAZ-ZETCQYMHSA-N	0.139091	0.149232	0.147068	0.14513	0.175308	0.181121	0.169777	0.175402	1.28434	0.00254041	0.012978	1.20858	0.273316
1122	(2R,3S,4S,5R,6R)-2-(hydroxymethyl)-6-(1-vinylhexoxy)tetrahydropyran-3,4,5-triol	3.69	level1			271.155	363.5	NEG	C14H26O6				Fatty acids	Fatty acyl glycosides	Fatty acyl glycosides of mono- and disaccharides	MPSRBJBPHXIOFN-MXNNCRBYSA-N	0.0302976	0.0364924	0.0339288	0.0335729	0.0484356	0.0555342	0.0457707	0.0499135	1.24527	0.00881915	0.0306977	1.48672	0.572133
1123	(1S,4aR,6aS,6bR,10R,11R,12aR)-1,10,11-trihydroxy-9,9-bis(hydroxymethyl)-2,2,6a,6b,12a-pentamethyl-1,3,4,5,6,6a,7,8,8a,10,11,12,13,14b-tetradecahydropicene-4a-carboxylic acid	3.69	level1			519.332	334.3	NEG	C30H48O7		109742-48-5		Terpenoids	Triterpenoids	Oleanane triterpenoids	AMUBZPULDIMIKH-UGBSTRDVSA-N	0.00097691	0.00059307	0.00155782	0.0010426	0.0630402	0.0538861	0.0597503	0.0588922	1.33	0.00194149	0.0108405	56.486	5.81982
1124	2-[[3,4-dihydroxy-5-(hydroxymethyl)tetrahydrofuran-2-yl]oxymethyl]-6-[1-methyl-1-(4-methylcyclohex-3-en-1-yl)ethoxy]tetrahydropyran-3,4,5-triol	3.69	level1			429.213	297.1	NEG	C21H36O10				Terpenoids	Monoterpenoids		VQNYZNUWUDHTKB-UHFFFAOYSA-N	0.53097	0.632209	0.578861	0.58068	0.291824	0.276508	0.277556	0.281962	1.3285	0.000546291	0.00475114	0.485573	-1.04224
1126	Syringin	3.69	level1			371.134	264.2	NEG	C17H24O9	HMDB0242525	118-34-3	C01533	Terpenoids	Monoterpenoids	Menthane monoterpenoids	QJVXKWHHAMZTBY-GCPOEHJPSA-N	0.0720639	0.0731761	0.0736403	0.0729601	0.211222	0.195085	0.201107	0.202471	1.34101	0.00119947	0.00787403	2.77509	1.47254
1127	(E)-3-[4-methoxy-2-[(2S,3R,4S,5S,6R)-3,4,5-trihydroxy-6-(hydroxymethyl)tetrahydropyran-2-yl]oxy-phenyl]prop-2-enoic acid	3.69	level1			355.103	228.5	NEG	C16H20O9		31564-49-5		Shikimates and Phenylpropanoids	Phenylpropanoids (C6-C3)	Cinnamic acids and derivatives	FQWZGEBZILOCET-BJGSYIFTSA-N	0.0606937	0.0678569	0.0659619	0.0648375	0.153024	0.156845	0.13196	0.147276	1.32609	0.000507203	0.00454541	2.27147	1.18363
1129	Methionine sulfoxide	3.69	level1			166.053	421.8	POS	C5H11NO3S	HMDB0002005	62697-73-8	C02989	Amino acids and Peptides	Small peptides	Aminoacids	QEFRNWWLZKMPFJ-UHFFFAOYSA-N	0.0652663	0.0434591	0.0663682	0.0583646	0.157456	0.160128	0.165207	0.16093	1.29683	0.000193004	0.00255167	2.75733	1.46327
1131	3-[6-[(2S,3R,4S,5S,6R)-3,4,5-trihydroxy-6-(hydroxymethyl)tetrahydropyran-2-yl]oxybenzofuran-5-yl]propanoic acid	3.69	level1			367.104	276.8	NEG	C17H20O9		141896-53-9		Shikimates and Phenylpropanoids	Coumarins	Simple coumarins	OHMWGMHIZWOKHV-USACIQFYSA-N	0.144337	0.136616	0.146184	0.142379	0.231198	0.26151	0.265773	0.252827	1.32318	0.000608022	0.00508054	1.77573	0.828412
1132	3-Hydroxy-4-aminopyridine	3.69	level1			111.055	261.9	POS	C5H6N2O	HMDB0060741	52334-53-9		Alkaloids			DBDKLFOUWUHPDW-UHFFFAOYSA-N	0.0113548	0.0108954	0.0112572	0.0111691	0.0118537	0.0117152	0.011701	0.0117566	1.19544	0.016545	0.0482437	1.0526	0.0739558
1135	1,3,5-trimethylpyrazole-4-carboxylic acid	3.69	level1			155.081	112.7	POS	C7H10N2O2		1125-29-7		Alkaloids			NOIOGQJFLIPRBI-UHFFFAOYSA-N	0.0124697	0.0156113	0.0122987	0.0134599	0.00598054	0.00580697	0.00609627	0.00596126	1.3182	0.0194894	0.0543739	0.442891	-1.17498
1137	(4aR,6aS,9aR)-1,8,8-trimethyl-2-oxo-1,4,4a,6a,7,9-hexahydropentaleno[1,6a-c]pyran-5-carboxylic acid	3.68	level1			263.128	101	NEG	C15H20O4		138458-84-1		Terpenoids	Sesquiterpenoids	Pentalenane sesquiterpenoids	MRLXXQBBRNRWDA-DBLSXQDMSA-N	0.336937	0.336183	0.346635	0.339918	0.26299	0.244259	0.254197	0.253815	1.32508	0.000173542	0.00240331	0.746695	-0.421408
1138	3-Hydroxy-4-methoxyacetophenone	3.68	level1			167.07	284.8	POS	C9H10O3		6100-74-9		Shikimates and Phenylpropanoids			YLTGFGDODHXMFB-UHFFFAOYSA-N	0.0667486	0.0590568	0.0628352	0.0628802	0.0445075	0.0463627	0.0464547	0.045775	1.30448	0.00177254	0.0102162	0.727971	-0.458047
1139	o-Tyrosine	3.68	level1			182.081	74.5	POS	C9H11NO3	HMDB0006050	2370-61-8		Amino acids and Peptides	Small peptides	Aminoacids	WRFPVMFCRNYQNR-UHFFFAOYSA-N	0.135445	0.0965794	0.129586	0.120537	0.0204533	0.0201537	0.017631	0.0194127	1.33115	0.0136352	0.0419488	0.161052	-2.6344
1144	Veratrosine	3.68	level1			572.357	296.6	POS	C33H49NO7		475-00-3		Alkaloids	Pseudoalkaloids	Steroidal alkaloids	WXQHVBNTINGJJR-NIFRNHPISA-N	0.0326235	0.0315712	0.0312798	0.0318248	0.0409944	0.045093	0.0396716	0.0419197	1.28738	0.00388041	0.0172657	1.3172	0.397476
1146	(2R,3R,4S,5R,6R)-2-(hydroxymethyl)-6-[[(2R,3S,4S,5R,6S)-3,4,5-trihydroxy-6-[[(1S,2S,4S,5S,6R,10S)-5-hydroxy-2-(hydroxymethyl)-3,9-dioxatricyclo[4.4.0.02,4]dec-7-en-10-yl]oxy]tetrahydropyran-2-yl]methoxy]tetrahydropyran-3,4,5-triol	3.68	level1			505.156	236.5	NEG	C21H32O15		81720-05-0		Terpenoids	Monoterpenoids	Iridoids monoterpenoids	DTNSOISBYQKHCS-PHLAQERCSA-N	0.219707	0.25169	0.231648	0.234348	0.112098	0.136364	0.106783	0.118415	1.30447	0.000883658	0.00645787	0.505295	-0.984801
1147	Maltotetraose	3.68	level1			649.217	96.6	POS	C24H42O21	HMDB0001296	34612-38-9	C02013	Carbohydrates	Saccharides	Polysaccharides	LUEWUZLMQUOBSB-CHYJJPLWSA-N	2.18929e-06	0.000178594	2.21181e-06	6.09985e-05	0.000524795	0.00146588	0.00113504	0.00104191	1.12362	0.0253414	0.0660714	17.0809	4.09431
1148	Mannose	3.68	level1			179.056	5.1	NEG	C6H12O6	HMDB0000169	3458-28-4	C00159	Carbohydrates	Saccharides	Monosaccharides	WQZGKKKJIJFFOK-QTVWNMPRSA-N	0.148511	0.134544	0.15058	0.144545	0.227527	0.237034	0.183587	0.216049	1.23029	0.0142172	0.0432096	1.49469	0.579842
1150	Azetidine-2-carboxylic acid	3.68	level1			100.04	390.7	NEG	C4H7NO2	HMDB0029615	2133-34-8		Amino acids and Peptides	Small peptides	Aminoacids	IADUEWIQBXOCDZ-UHFFFAOYSA-N	0.0293624	0.0375656	0.0339155	0.0336145	0.0235838	0.0210222	0.019998	0.0215347	1.25129	0.00970826	0.0328307	0.640636	-0.642423
1151	(2R,3S,4S,5R,6S)-5-[(2S,3R,4R)-3,4-dihydroxy-4-(hydroxymethyl)tetrahydrofuran-2-yl]oxy-6-[4-[(3R,6S)-3-(4-hydroxy-3,5-dimethoxy-phenyl)-1,3,3a,4,6,6a-hexahydrofuro[3,4-c]furan-6-yl]-2,6-dimethoxy-phenoxy]-2-(hydroxymethyl)tetrahydropyran-3,4-diol	3.68	level1			711.249	239.5	NEG	C33H44O17				Shikimates and Phenylpropanoids	Lignans	Furofuranoid lignans	BUBVKRMIMSPLND-YTDPHAJHSA-N	0.00361286	0.00366996	0.00328696	0.00352326	0.0134441	0.0124015	0.0129723	0.0129393	1.3399	8.36332e-06	0.000510913	3.67253	1.87677
1152	Dihydrouracil	3.68	level1			115.05	112.6	POS	C4H6N2O2	HMDB0000076	504-07-4	C00429	Alkaloids	Lysine alkaloids		OIVLITBTBDPEFK-UHFFFAOYSA-N	0.00967887	0.0110668	0.0105618	0.0104358	0.00865523	0.00817768	0.00896898	0.00860063	1.20495	0.0170203	0.049235	0.824144	-0.279032
1153	7-(3,4-dihydroxyphenyl)-1-(4-hydroxyphenyl)-5-[(2S,3R,4S,5R)-3,4,5-trihydroxytetrahydropyran-2-yl]oxy-heptan-3-one	3.68	level1			463.193	60.5	POS	C24H30O9				Shikimates and Phenylpropanoids	Diarylheptanoids	Linear diarylheptanoids	KQQLSXWIDDTWRR-WUOZLOAJSA-N	0.0119944	0.0100597	0.0103337	0.0107959	0.00810456	0.00661981	0.00886074	0.0078617	1.13045	0.0304002	0.0755697	0.728211	-0.457571
1154	(2R)-2-phenyl-2-[(2S,3R,4S,5S,6R)-3,4,5-trihydroxy-6-(hydroxymethyl)tetrahydropyran-2-yl]oxy-acetic acid	3.67	level1			313.093	209.6	NEG	C14H18O8				Shikimates and Phenylpropanoids	Phenylpropanoids (C6-C3)	Cinnamic acids and derivatives	PRBPGFIPERGSFI-SGYGPSCOSA-N	0.159306	0.157577	0.162127	0.15967	0.116109	0.111508	0.0974372	0.108351	1.2942	0.000883556	0.00645738	0.678595	-0.559377
1155	2-(3,4-dihydroxyphenyl)-5-hydroxy-7-[(2S,3R,4S,5S,6R)-3,4,5-trihydroxy-6-[[(2R,3R,4R,5R,6S)-3,4,5-trihydroxy-6-methyl-tetrahydropyran-2-yl]oxymethyl]tetrahydropyran-2-yl]oxy-chromen-4-one	3.67	level1			593.151	305	NEG	C27H30O15		20633-84-5		Shikimates and Phenylpropanoids	Flavonoids	Flavones	MGYBYJXAXUBTQF-FOBVWLSUSA-N	0.0499685	0.0637512	0.0628619	0.0588605	0.0121724	0.0124976	0.0172077	0.0139592	1.31981	0.000693574	0.00552188	0.237157	-2.07608
1158	(3R,4R)-4,5-dihydroxy-3-methoxy-4-(4-methoxyphenyl)-6-[(E)-2-(2,5,5-trimethyltetrahydropyran-2-yl)vinyl]-1,3-dihydroquinolin-2-one	3.67	level1			466.223	393.3	NEG	C27H33NO6		180045-91-4		Alkaloids	Tryptophan alkaloids	Quinoline alkaloids	CVWJKBJRSZXDIW-IUEPNFFLSA-N	0.0278069	0.0317358	0.0204698	0.0266708	0.0174657	0.00969235	0.0104576	0.0125385	1.15777	0.0266377	0.0685472	0.470122	-1.08889
1159	(2S)-5,7-dimethoxy-2-(4-methoxyphenyl)chroman-4-one	3.67	level1			313.111	365.6	NEG	C18H18O5		38302-15-7		Shikimates and Phenylpropanoids	Flavonoids	Flavanones	MQFSCAHSIUPLSB-HNNXBMFYSA-N	0.0468809	0.0418032	0.0424705	0.0437182	0.0173925	0.0137192	0.0180186	0.0163768	1.31852	0.000194287	0.0025637	0.374598	-1.41658
1160	(1S,3R,4R,5R)-1,3-bis[[(E)-3-(3,4-dihydroxyphenyl)prop-2-enoyl]oxy]-4,5-dihydroxy-cyclohexanecarboxylic acid	3.67	level1			499.125	230.7	POS	C25H24O12		19870-46-3		Shikimates and Phenylpropanoids	Phenylpropanoids (C6-C3)	Cinnamic acids and derivatives	YDDUMTOHNYZQPO-PSEXTPKNSA-N	0.0112777	0.0122725	0.0138855	0.0124786	0.0320194	0.0307881	0.02777	0.0301925	1.32364	0.000274375	0.00310167	2.41955	1.27474
1164	Dihydrotachysterol	3.66	level1			399.361	631.3	POS	C28H46O	HMDB0015203	67-96-9	C06957	Terpenoids	Steroids	Vitamin D2 and derivatives	ILYCWAKSDCYMBB-OPCMSESCSA-N	0.285456	0.280727	0.292636	0.286273	0.452362	0.480413	0.425087	0.452621	1.32463	0.000524707	0.00463486	1.58108	0.660912
1165	3-[2-hydroxy-7-(1-hydroxy-1-methyl-ethyl)-9b-methoxycarbonyl-2,3a,6,9a-tetramethyl-4-methylene-1,3-dioxo-5a,7,8,9-tetrahydro-5H-cyclopenta[a]naphthalen-6-yl]propanoic acid	3.66	level1			477.249	438.7	NEG	C26H38O8				Terpenoids	Meroterpenoids	Tetraketide meroterpenoids	ARHZXCIVYQVVOK-UHFFFAOYSA-N	0.0134057	0.0226132	0.0163076	0.0174422	0.0682636	0.0690294	0.03595	0.0577477	1.22392	0.0230118	0.061472	3.31081	1.72718
1166	Aurantiamide acetate	3.66	level1			425.181	403.4	NEG	C27H28N2O4		56121-42-7		Amino acids and Peptides	Small peptides	Dipeptides	VZPAURMDJZOGHU-SKCDSABHSA-N	0.041699	0.0489174	0.0402403	0.0436189	0.284439	0.287966	0.254361	0.275588	1.33823	2.98334e-05	0.000935002	6.3181	2.65949
1167	4-methoxy-7-[[(2R,3R,4S,5S,6R)-3,4,5-trihydroxy-6-(hydroxymethyl)tetrahydropyran-2-yl]oxymethyl]furo[3,2-g]chromen-5-one	3.66	level1			391.104	295	POS	C19H20O10		17226-75-4	C09011	Polyketides	Chromanes	Chromones	SJRACCTZSAUMGO-WIMVFMHDSA-N	0.00355089	0.00316916	0.002722	0.00314735	0.000256251	0.000438776	2.62293e-06	0.00023255	1.02541	0.000422781	0.00403053	0.0738876	-3.75852
1172	10,13-dimethyl-17-oxo-3-sulfooxy-1,2,3,4,7,8,9,11,12,14,15,16-dodecahydrocyclopenta[a]phenanthrene	3.66	level1			349.15	78.5	NEG	C19H28O5S	HMDB0001032	651-48-9	C04555	Terpenoids	Steroids	Androstane steroids	CZWCKYRVOZZJNM-USOAJAOKSA-N	0.257935	0.331831	0.275631	0.288466	0.483179	0.485353	0.418338	0.46229	1.25449	0.00514398	0.020993	1.60258	0.680398
1173	cis-​9,​10-​Epoxystearic acid	3.66	level1			279.232	67.7	NEG	C18H34O3	HMDB0247617	24560-98-3	C19418	Fatty acids	Octadecanoids	Other Octadecanoids	IMYZYCNQZDBZBQ-UHFFFAOYSA-N	2.2743	2.40565	2.45514	2.37836	1.60806	1.49578	1.82323	1.64235	1.27388	0.00261129	0.0132159	0.690539	-0.534205
1174	Gly-Ala	3.65	level1			145.062	91.3	NEG	C5H10N2O3	HMDB0252875	3695-73-6		Amino acids and Peptides	Small peptides	Dipeptides	VPZXBVLAVMBEQI-VKHMYHEASA-N	0.0608487	0.0738661	0.090739	0.0751513	0.0389232	0.0340179	0.0565704	0.0431705	1.11349	0.0441949	0.10033	0.574448	-0.799752
1177	Oxodecadienoylcarnitine (Car(10:3-O))	3.65	level1			326.195	255.3	POS	C17H27NO5							VYSOXFPSOQHOSK-SUTYWZMXSA-N	0.0463447	0.0428075	0.0461012	0.0450845	0.119387	0.103406	0.125491	0.116095	1.33087	0.000444005	0.00416513	2.57505	1.3646
1178	Decadienedioylcarnitine (Car(10:2-O2))	3.65	level1			342.19	310.2	POS	C17H27NO6	HMDB0241115			Fatty acids	Fatty esters	Fatty acyl carnitines	QIOKVSZQLUIDLW-JEGFTUTRSA-N	0.00104279	0.000473992	0.000248916	0.000588565	0.00273603	0.00394898	0.00517144	0.00395215	1.2281	0.0105358	0.0348212	6.71488	2.74736
1179	Salicin	3.65	level1			285.098	103.5	NEG	C13H18O7	HMDB0003546	138-52-3	C01451	Shikimates and Phenylpropanoids	Phenolic acids (C6-C1)	Simple phenolic acids	NGFMICBWJRZIBI-UJPOAAIJSA-N	0.0731735	0.0803885	0.0834071	0.0789897	0.0186855	0.0239581	0.0179315	0.0201917	1.32938	8.0384e-05	0.00156348	0.255625	-1.9679
1180	1-BCP	3.65	level1			234.112	72.9	POS	C13H15NO3	HMDB0243831	34023-62-6		Alkaloids	Lysine alkaloids	Piperidine alkaloids	BXBNADAPIHHXJQ-UHFFFAOYSA-N	0.000595443	0.0010152	0.000725091	0.000778578	0.000207846	2.74836e-06	2.62293e-06	7.10725e-05	1.10091	0.00752515	0.0274178	0.091285	-3.45348
1183	3-(2,5-Dimethoxyphenyl)propionic acid	3.64	level1			209.079	325.8	NEG	C11H14O4		10538-49-5		Alkaloids			JENQUCZZZGYHRW-UHFFFAOYSA-N	0.0245878	0.0280305	0.029726	0.0274481	0.0453038	0.04819	0.0400472	0.0445137	1.27604	0.00377459	0.0169354	1.62174	0.697543
1185	Sec-O-Glucosylhamaudol	3.64	level1			437.145	281.6	NEG	C21H26O10		80681-44-3	C17484	Polyketides	Chromanes	Chromones	QVUPQEXKTXSMKX-JJDILSOYSA-N	0.0165761	0.0202006	0.0207749	0.0191839	0.0400931	0.0402858	0.036069	0.0388159	1.30861	0.000496967	0.00448173	2.02336	1.01675
1186	Sappanone A	3.64	level1			285.078	267.7	POS	C16H12O5		102067-84-5		Shikimates and Phenylpropanoids	Flavonoids	Aurones	KVYZXXBTJHJISR-BJMVGYQFSA-N	0.0164655	0.0180088	0.0154559	0.0166434	0.0356251	0.0407354	0.0383543	0.0382382	1.3288	0.000197933	0.00259315	2.2975	1.20006
1187	regaloside I	3.64	level1			425.141	250.5	POS	C20H26O11		126239-78-9		Shikimates and Phenylpropanoids	Phenylpropanoids (C6-C3)	Cinnamic acids and derivatives	CPSJADJRZYHWCV-BRUXLGTASA-N	0.0219159	0.0207897	0.0232025	0.0219694	0.0109772	0.00989858	0.011104	0.0106599	1.33032	0.00014183	0.00214032	0.485219	-1.04329
1188	2-(2-acetyl-3-hydroxy-5-methoxy-phenyl)acetic acid	3.64	level1			225.075	239.4	POS	C11H12O5		19054-28-5		Polyketides			UYUOIPIOTPMHKV-UHFFFAOYSA-N	0.0277438	0.0265328	0.0267022	0.0269929	0.135434	0.135098	0.116943	0.129158	1.33975	0.00345239	0.0159317	4.78489	2.25849
1189	2-Aminopimelate	3.64	level1			156.067	98.7	NEG	C7H13NO4	HMDB0034252	26630-55-7		Amino acids and Peptides	Small peptides	Aminoacids	JUQLUIFNNFIIKC-UHFFFAOYSA-N	0.0794727	0.0925461	0.0899147	0.0873112	0.0431042	0.0329478	0.0366275	0.0375598	1.31249	0.000561952	0.00483565	0.430184	-1.21698
1193	Brefeldin A	3.64	level1			279.163	25.2	NEG	C16H24O4				Polyketides	Macrolides	Macrolide lactones	KQNZDYYTLMIZCT-UHFFFAOYSA-N	0.810856	0.921595	0.82606	0.852837	1.54653	1.68232	1.46873	1.56586	1.31932	0.00056464	0.00485087	1.83606	0.876614
1195	4-hydroxy-3,5,6-trimethyl-pyran-2-one	3.63	level1			137.059	224.2	POS	C8H10O3		50405-44-2		Polyketides	Cyclic polyketides	2-pyrone derivatives	ZCLDVNJXGNOJKY-UHFFFAOYSA-N	0.0178998	0.0141734	0.0154046	0.0158259	0.02255	0.0258451	0.0358801	0.0280917	1.17675	0.041908	0.0963023	1.77505	0.827857
1196	Orcinol glucoside	3.63	level1			285.098	103.5	NEG	C13H18O7		21082-33-7		Polyketides			YTXIGTCAQNODGD-UHFFFAOYSA-N	0.0731735	0.0803885	0.0834071	0.0789897	0.0186855	0.0239581	0.0179315	0.0201917	1.32938	8.0384e-05	0.00156348	0.255625	-1.9679
1197	[3-acetoxy-2-[3,4,5-trihydroxy-6-(hydroxymethyl)tetrahydropyran-2-yl]oxy-propyl] 3-(4-hydroxyphenyl)prop-2-enoate	3.63	level1			425.141	250.5	POS	C20H26O11		114420-67-6		Shikimates and Phenylpropanoids	Phenylpropanoids (C6-C3)	Cinnamic acids and derivatives	YQKQOLPNKNHLBO-UHFFFAOYSA-N	0.0219159	0.0207897	0.0232025	0.0219694	0.0109772	0.00989858	0.011104	0.0106599	1.33032	0.00014183	0.00214032	0.485219	-1.04329
1199	4,18-dihydroxy-15-(3-hydroxy-3-methyl-butyl)-2-methoxy-7,9,13-trioxapentacyclo[10.8.0.03,10.04,8.014,19]icosa-1,3(10),5,11,14,16,18-heptaen-20-one	3.63	level1			425.127	423	NEG	C23H22O8				Polyketides	Xanthones	Methyl xanthones	ICLRNDIRYAEKCT-UHFFFAOYSA-N	0.225227	0.316138	0.254508	0.265291	0.644286	0.882319	0.805875	0.777493	1.30006	0.00241685	0.01255	2.93072	1.55125
1202	10-[(2R,3R,4S,5S,6R)-3,4,5-trihydroxy-6-(hydroxymethyl)tetrahydropyran-2-yl]oxydeca-4,6-diynoic acid	3.63	level1			341.123	285.5	NEG	C16H22O8							BAGGOTACEXSWCA-YMILTQATSA-N	0.0808356	0.0897245	0.0885833	0.0863811	0.119578	0.123828	0.113532	0.118979	1.29848	0.00134166	0.00849513	1.37738	0.461923
1203	(2E,4E)-5-[1-hydroxy-2,6-dimethyl-4-oxo-6-[[(2R,3R,4S,5S,6R)-3,4,5-trihydroxy-6-(hydroxymethyl)tetrahydropyran-2-yl]oxymethyl]cyclohex-2-en-1-yl]-3-methyl-penta-2,4-dienoic acid	3.63	level1			423.169	246.7	NEG	C21H30O10		711029-32-2		Terpenoids	Apocarotenoids	Apocarotenoids(ε-)	NDFUYJPVVCJYNZ-MVIFEUJBSA-N	0.0441169	0.044672	0.0474379	0.0454089	0.00892378	0.0284455	0.0216473	0.0196722	1.07991	0.0114431	0.0369722	0.433223	-1.20682
1205	2-hydroxy-3,4-bis(hydroxymethyl)benzoic acid	3.63	level1			197.045	159.9	NEG	C9H10O5				Shikimates and Phenylpropanoids	Phenolic acids (C6-C1)	Simple phenolic acids	ABLKOPZEYPMJQS-UHFFFAOYSA-N	0.040566	0.0395587	0.0356537	0.0385928	0.0482942	0.0487802	0.0481138	0.0483961	1.26869	0.0210202	0.057456	1.25402	0.326559
1207	(2S,4aS,6aR,6aS,6bR,8aR,10S,12aS,14bR)-10-(3-carboxypropanoyloxy)-2,4a,6a,6b,9,9,12a-heptamethyl-13-oxo-3,4,5,6,6a,7,8,8a,10,11,12,14b-dodecahydro-1H-picene-2-carboxylic acid	3.62	level1			569.345	448.2	NEG	C34H50O7		5697-56-3	D07615	Terpenoids	Triterpenoids	Oleanane triterpenoids	OBZHEBDUNPOCJG-WBXJDKIVSA-N	0.000649586	0.00111187	0.000284938	0.000682132	0.00754713	0.0121329	0.00672677	0.00880227	1.27609	0.0380073	0.0894246	12.9041	3.68975
1208	4-hydroxy-4-[(E)-3-hydroxybut-1-enyl]-3,5,5-trimethyl-cyclohex-2-en-1-one	3.62	level1			223.136	238.6	NEG	C13H20O3		24427-77-8	C04166	Terpenoids	Apocarotenoids	Apocarotenoids(ε-)	KPQMCAKZRXOZLB-AATRIKPKSA-N	0.669308	0.757317	0.716282	0.714303	0.563463	0.54752	0.512739	0.541241	1.2768	0.00421968	0.0182951	0.757719	-0.400265
1210	Nipecotic acid	3.62	level1			130.086	347	POS	C6H11NO2	HMDB0255618	498-95-3		Alkaloids	Lysine alkaloids		XJLSEXAGTJCILF-UHFFFAOYSA-N	0.0325969	0.0356123	0.0360133	0.0347409	0.0117685	0.00984044	0.0119392	0.0111827	1.33246	4.98606e-05	0.00121678	0.32189	-1.63536
1212	N1-Methyl-4-pyridone-3-carboxamide	3.62	level1			153.065	153.1	POS	C7H8N2O2	HMDB0004194	769-49-3	C05843	Alkaloids	Nicotinic acid alkaloids	Pyridine alkaloids	KTLRWTOPTKGYQY-UHFFFAOYSA-N	0.0168856	0.016024	0.0159217	0.0162771	0.0295324	0.0266876	0.0284799	0.0282333	1.3324	0.000173636	0.00240389	1.73454	0.794552
1213	2,2,6,6-Tetramethyl-4-piperidinyl 2-methylacrylate	3.62	level1			226.18	119.4	POS	C13H23NO2		31582-45-3		Alkaloids	Lysine alkaloids	Piperidine alkaloids	UFLXKQBCEYNCDU-UHFFFAOYSA-N	0.0455975	0.0640105	0.0368548	0.0488209	0.0837679	0.0775154	0.0736732	0.0783188	1.11835	0.0258295	0.0670062	1.60421	0.681859
1217	DMPO	3.61	level1			114.091	41.3	POS	C6H11NO	HMDB0246162	3317-61-1					VCUVETGKTILCLC-UHFFFAOYSA-N	0.0161763	0.0222924	0.0250567	0.0211751	0.003664	0.00160793	0.00384419	0.00303871	1.28139	0.0026287	0.0132749	0.143504	-2.80084
1218	Protopine	3.61	level1			354.137	224.8	POS	C20H19NO5	HMDB0003920	130-86-9	C05189	Alkaloids	Tyrosine alkaloids	Isoquinoline alkaloids	GPTFURBXHJWNHR-UHFFFAOYSA-N	0.0130761	0.0147284	0.0122169	0.0133405	0.00846695	0.00852106	0.0104176	0.00913519	1.22046	0.0126018	0.0396352	0.684774	-0.5463
1219	Posaconazole	3.61	level1			701.332	464.7	POS	C37H42F2N8O4		171228-49-2	D02555				RAGOYPUPXAKGKH-XAKZXMRKSA-N	0.0042779	0.00479239	0.00491216	0.00466082	2.72839e-06	0.000387538	0.000332225	0.00024083	1.06189	4.22118e-05	0.00111614	0.0516713	-4.27449
1223	4-Ketopimelic acid	3.61	level1			173.045	463.3	NEG	C7H10O5		502-50-1		Fatty acids	Fatty Acids and Conjugates	Dicarboxylic acids	UDDSEESQRGPVIL-UHFFFAOYSA-N	0.0764481	0.0895209	0.077969	0.0813127	3.65609	3.53951	2.95159	3.3824	1.34102	0.0043221	0.0185977	41.5974	5.37842
1224	Flurandrenolide	3.61	level1			437.235	82.2	POS	C24H33FO6	HMDB0014984	1524-88-5	D00328	Terpenoids	Steroids	Pregnane steroids	POPFMWWJOGLOIF-XWCQMRHXSA-N	0.0770767	0.115462	0.0912824	0.094607	0.124306	0.139871	0.168455	0.144211	1.10389	0.0441415	0.100249	1.52432	0.608162
1225	7-hydroxy-3-(4-hydroxyphenyl)-5-methoxy-chromen-4-one	3.6	level1			285.078	267.7	POS	C16H12O5		4569-98-6		Shikimates and Phenylpropanoids	Isoflavonoids	Isoflavones	YSINCDVRUMTOPK-UHFFFAOYSA-N	0.0164655	0.0180088	0.0154559	0.0166434	0.0356251	0.0407354	0.0383543	0.0382382	1.3288	0.000197933	0.00259315	2.2975	1.20006
1226	PC(39:7)	3.6	level1			800.567	569.1	POS	C47H80NO8P							ANSBSRQQQLGROE-ZEBHBPEESA-N	0.0208132	0.0194894	0.0216385	0.0206471	0.0177089	0.0177198	0.0159565	0.0171284	1.20267	0.0148069	0.044498	0.829581	-0.269545
1227	beta-Estradiol	3.6	level1			273.184	436.2	POS	C18H24O2	HMDB0000151	50-28-2	C00951	Terpenoids	Steroids	Estrane steroids	VOXZDWNPVJITMN-ZBRFXRBCSA-N	0.0141558	0.0175405	0.0138276	0.0151746	0.0260513	0.027317	0.0244799	0.0259494	1.28387	0.00171843	0.0100149	1.71005	0.77404
1229	methyl (E)-8-(4-hydroxy-6-methoxy-7-methyl-3-oxo-1H-2-benzofuran-5-yl)-2,6-dimethyloct-6-enoate	3.6	level1			375.184	416.9	NEG	C21H28O6				Polyketides	Cyclic polyketides	Phthalide derivatives	WTKBSOWHEPFXEG-FMIVXFBMSA-N	0.117826	0.128524	0.0953586	0.113903	0.433496	0.477919	0.430934	0.44745	1.32986	5.1191e-05	0.00123381	3.92835	1.97392
1230	(10Z,13Z)-15,16-dihydroxyoctadeca-10,13-dienoic acid	3.6	level1			313.236	392	POS	C18H32O4				Fatty acids	Octadecanoids	Other Octadecanoids	IQWYIIPDFISFMV-HWXFIQLYSA-N	0.0628601	0.0724169	0.0658982	0.0670584	0.251318	0.22077	0.23539	0.235826	1.33704	5.33209e-05	0.00125941	3.51673	1.81423
1231	(1R,6R,13R)-13-hydroxy-6-(1-hydroxy-1-methyl-ethyl)-16,17-dimethoxy-2,7,20-trioxapentacyclo[11.8.0.03,11.04,8.014,19]henicosa-3(11),4(8),9,14,16,18-hexaen-12-one	3.6	level1			427.142	376.6	NEG	C23H24O8		85042-77-9		Shikimates and Phenylpropanoids	Isoflavonoids	Rotenoids	NSFCLBVWJYYZMR-DNVFCKCGSA-N	0.12638	0.149462	0.143768	0.13987	0.175357	0.18544	0.203125	0.187974	1.22297	0.0107881	0.0354192	1.34392	0.426445
1232	3-(2,4-Dihydroxypentyl)-6,8-dihydroxyisochromen-1-one	3.6	level1			279.09	315.1	NEG	C14H16O6				Shikimates and Phenylpropanoids	Coumarins	Isocoumarins	CQXZVXNVRFIVCN-UHFFFAOYSA-N	0.0128786	0.0248633	0.0312222	0.022988	0.0563399	0.0636547	0.0602646	0.0600864	1.18695	0.00302492	0.0145589	2.61381	1.38616
1233	methyl (1S,4aS,8S,8aS)-1-methyl-3-oxo-8-[(2S,3R,4S,5S,6R)-3,4,5-trihydroxy-6-(hydroxymethyl)tetrahydropyran-2-yl]oxy-4,4a,8,8a-tetrahydro-1H-pyrano[3,4-c]pyran-5-carboxylate	3.6	level1			385.117	177.2	NEG	C17H24O11		25406-67-1		Terpenoids	Monoterpenoids	Iridoids monoterpenoids	QZCJFXSHMSZCLH-QAPDQXECSA-N	0.0555873	0.0602525	0.0539122	0.056584	0.168433	0.208279	0.173267	0.183326	1.33133	0.00850462	0.0299041	3.2399	1.69595
1234	Timosaponin BII	3.6	level1			919.486	291.3	NEG	C45H76O19	HMDB0034187	98524-46-0		Terpenoids	Steroids	Furostane steroids	SORUXVRKWOHYEO-UHFFFAOYSA-N	0.0010825	0.00136926	0.00163222	0.00136133	0.00059812	1.19512e-05	1.11134e-05	0.000207062	1.06304	0.0101597	0.0339193	0.152102	-2.71688
1236	Ganoderic acid B	3.59	level1			497.288	176.8	NEG	C30H44O7		81907-61-1		Terpenoids	Triterpenoids	Lanostane, Tirucallane and Euphane triterpenoids	LWPLEHFGBRFRKI-NBCWKOIPSA-N	0.149639	0.162656	0.15331	0.155202	0.0705497	0.0696547	0.0389331	0.0597125	1.24685	0.00100057	0.00698884	0.384741	-1.37804
1240	Phenazopyridine (hydrochloride)	3.59	level1			214.107	98.4	POS	C11H11N5		136-40-3	C07429|D08346	Alkaloids	Pseudoalkaloids	Azo and Azoxy alkaloids	QPFYXYFORQJZEC-UHFFFAOYSA-N	0.00618547	0.00727645	0.00753045	0.00699746	0.0177643	0.0217622	0.0148327	0.0181198	1.29569	0.00559817	0.0222571	2.58948	1.37266
1242	Loratadine	3.57	level1			383.15	418.9	POS	C22H23ClN2O2	HMDB0005000	79794-75-5	C06818	Alkaloids			JCCNYMKQOSZNPW-UHFFFAOYSA-N	0.000558865	0.000646437	0.000374325	0.000526542	0.00415936	0.00330359	0.00327427	0.00357907	1.31995	0.000533242	0.00468666	6.79732	2.76497
1243	Andrographolide	3.57	level1			351.213	376.5	POS	C20H30O5		5508-58-7	C20214	Terpenoids	Diterpenoids	Labdane diterpenoids	BOJKULTULYSRAS-OTESTREVSA-N	0.0698486	0.0755012	0.0724502	0.0726	0.173349	0.143903	0.167586	0.161613	1.32687	0.000626995	0.00517933	2.22607	1.1545
1249	(3E,4R)-3-[2-[(1R,4aS,5R,6R,8aS)-6-hydroxy-5-(hydroxymethyl)-5,8a-dimethyl-2-methylene-decalin-1-yl]ethylidene]-4-hydroxy-tetrahydrofuran-2-one	3.56	level1			351.213	376.5	POS	C20H30O5		142037-79-4		Terpenoids	Diterpenoids	Labdane diterpenoids	BOJKULTULYSRAS-NPWGMBKGSA-N	0.0698486	0.0755012	0.0724502	0.0726	0.173349	0.143903	0.167586	0.161613	1.32687	0.000626995	0.00517933	2.22607	1.1545
1250	SM(d36:2)	3.56	level1			729.583	573.7	POS	C41H81N2O6P							SHPISFZHCUNAIC-VSWYSSNSSA-N	0.0246852	0.0134218	0.0216172	0.0199081	0.00328934	0.00282992	0.00555582	0.00389169	1.27176	0.00987225	0.0332338	0.195483	-2.35488
1255	Foretinib	3.55	level1			631.233	292	NEG	C34H34F2N4O6	HMDB0252437	849217-64-7	D09618	Alkaloids			CXQHYVUVSFXTMY-UHFFFAOYSA-N	0.0245953	0.022616	0.0224874	0.0232329	0.0202248	0.0170934	0.0208	0.0193727	1.07917	0.044841	0.101458	0.833847	-0.262145
1256	Fuziline	3.55	level1			436.274	263.9	POS	C24H39NO7		80665-72-1		Alkaloids	Pseudoalkaloids	Terpenoid alkaloids	FPECZWKKKKZPPP-JIHBGUTISA-N	0.0133989	0.0166241	0.0166837	0.0155689	0.0348153	0.0275274	0.0270819	0.0298082	1.27203	0.0064594	0.0246297	1.9146	0.93704
1258	Steviolbioside	3.55	level1			641.325	344.5	NEG	C32H50O13		41093-60-1		Terpenoids	Diterpenoids	Tetracyclic diterpenoids	OMHUCGDTACNQEX-VKXXIMTPSA-N	0.000238786	1.2935e-05	0.000266073	0.000172598	0.00285363	0.00290743	0.00337035	0.0030438	1.1675	9.55173e-05	0.00171228	17.6352	4.14039
1262	Moclobemide	3.54	level1			267.087	260.6	NEG	C13H17ClN2O2	HMDB0015302	71320-77-9	D02561	Alkaloids			YHXISWVBGDMDLQ-UHFFFAOYSA-N	0.176017	0.198765	0.19705	0.19061	0.409363	0.407776	0.408557	0.408565	1.33485	0.00108099	0.00733271	2.14346	1.09994
1263	Gly-His	3.54	level1			211.082	346.4	NEG	C8H12N4O3	HMDB0028843	2489-13-6		Amino acids and Peptides	Small peptides	Aminoacids	YIWFXZNIBQBFHR-LURJTMIESA-N	0.159323	0.196802	0.191788	0.182637	0.0482145	0.0460613	0.0400356	0.0447705	1.3327	0.000327558	0.00344686	0.245133	-2.02836
1267	5-Hydroxytryptophan	3.53	level1			219.08	285.3	NEG	C11H12N2O3	HMDB0000472	4350-09-8	C00643	Amino acids and Peptides	Small peptides	Aminoacids	LDCYZAJDBXYCGN-VIFPVBQESA-N	0.0373181	0.0356852	0.0356564	0.0362199	0.0268358	0.0312231	0.0281494	0.0287361	1.24495	0.00607544	0.0235866	0.793379	-0.333917
1268	CD437	3.53	level1			397.186	112.6	NEG	C27H26O3	HMDB0244485	125316-60-1					LDGIHZJOIQSHPB-UHFFFAOYSA-N	0.028672	0.0232917	0.0249185	0.0256274	0.012218	0.00960881	0.00939606	0.0104076	1.30707	0.00114974	0.00765011	0.406114	-1.30004
1271	(1R,8R,9S,16R)-8,16-bis(4-hydroxyphenyl)-15-oxatetracyclo[8.6.1.02,7.014,17]heptadeca-2(7),3,5,10(17),11,13-hexaene-4,6,9,12-tetrol	3.51	level1			451.124	100.2	NEG	C28H22O7		105108-08-5		Shikimates and Phenylpropanoids	Stilbenoids	Oligomeric stibenes	LHUHHURKGTUZHU-MUUFRUSVSA-N	0.214739	0.196313	0.178108	0.196387	1.03387	0.985513	1.09141	1.03693	1.33912	1.30911e-05	0.000635141	5.28006	2.40055
1273	Scopolamine N-oxide	3.5	level1			320.154	226.8	POS	C17H21NO5		6106-81-6		Alkaloids	Ornithine alkaloids	Tropane alkaloids	GSYQNAMOFFWAPF-IILNCVEESA-N	0.0227877	0.0194871	0.021179	0.0211513	0.106375	0.101116	0.106318	0.104603	1.34032	1.92092e-06	0.00027973	4.94548	2.30611
1274	[(7R,8R,10R,13S,17R)-17-(3-furyl)-4,4,8,10,13-pentamethyl-3,16-dioxo-6,7,9,11,12,17-hexahydro-5H-cyclopenta[a]phenanthren-7-yl] acetate	3.5	level1			431.228	69.1	NEG	C28H34O5		26241-51-0		Terpenoids	Triterpenoids	Limonoids	KWAMDQVQFVBEAU-HUTQNEDRSA-N	0.169826	0.210319	0.191144	0.190429	0.0936486	0.08562	0.0797689	0.0863458	1.31792	0.00109128	0.00737731	0.453427	-1.14106
1276	(R)-[(2S,4S,5R)-5-ethylquinuclidin-2-yl]-(6-methoxy-4-quinolyl)methanol	3.48	level1			309.192	221	POS	C20H26N2O2		522-66-7		Alkaloids	Tryptophan alkaloids		LJOQGZACKSYWCH-WZBLMQSHSA-N	0.0163518	0.0140396	0.0147827	0.0150581	0.0238134	0.0203642	0.0209659	0.0217145	1.26543	0.00621643	0.0239697	1.44205	0.528126
1277	(S)-[(2R,4S,5R)-5-ethylquinuclidin-2-yl]-(6-methoxy-4-quinolyl)methanol	3.48	level1			309.192	221	POS	C20H26N2O2		1435-55-8		Alkaloids	Tryptophan alkaloids		LJOQGZACKSYWCH-LHHVKLHASA-N	0.0163518	0.0140396	0.0147827	0.0150581	0.0238134	0.0203642	0.0209659	0.0217145	1.26543	0.00621643	0.0239697	1.44205	0.528126
1278	2-[6-[2-(8H-furo[3,2-g]indol-2-yl)propan-2-yl]-3,8-dihydro-2H-furo[3,2-g]indol-2-yl]propan-2-ol	3.47	level1			413.181	397.2	NEG	C26H26N2O3				Alkaloids	Tryptophan alkaloids	Simple indole alkaloids	QZFVYGHNMSDRHF-UHFFFAOYSA-N	0.0676584	0.0714631	0.0635847	0.0675687	0.0150756	0.0199442	0.0178545	0.0176248	1.3315	4.85424e-05	0.00119915	0.260842	-1.93875
1279	4,6-dihydroxy-3-(1-hydroxyethyl)-5-methoxy-3H-isobenzofuran-1-one	3.46	level1			239.059	32.7	NEG	C11H12O6				Polyketides	Cyclic polyketides	Phthalide derivatives	BYTQIIPUIDTMNL-UHFFFAOYSA-N	0.402212	0.418424	0.61303	0.477889	0.665012	0.645942	0.749704	0.686886	1.07332	0.0492255	0.108824	1.43734	0.523397
1280	[(3S,8S,9R,10R,12R,13S,14R,17S)-17-acetyl-3,8,14,17-tetrahydroxy-10,13-dimethyl-1,2,3,4,7,9,11,12,15,16-decahydrocyclopenta[a]phenanthren-12-yl] 4-hydroxybenzoate	3.46	level1			481.228	299.2	NEG	C28H36O8		84745-94-8		Terpenoids	Steroids	Pregnane steroids	IMRGSWAJVVVYOW-ZCARJHNXSA-N	0.0213402	0.022565	0.0241564	0.0226872	0.0448873	0.0468684	0.042958	0.0449046	1.33095	9.02089e-05	0.00166141	1.97929	0.984984
1281	Tazarotene	3.44	level1			352.131	452.8	POS	C21H21NO2S	HMDB0014937	118292-40-3	C12531	Alkaloids	Nicotinic acid alkaloids	Pyridine alkaloids	OGQICQVSFDPSEI-UHFFFAOYSA-N	0.0556429	0.0742624	0.0417139	0.0572064	2.2985	4.43092	3.35317	3.36086	1.33185	0.0329852	0.0803268	58.7497	5.87651
1282	Hydroquinidine	3.43	level1			309.192	221	POS	C20H26N2O2	HMDB0242615	1435-55-8		Alkaloids	Tryptophan alkaloids		LJOQGZACKSYWCH-UHFFFAOYSA-N	0.0163518	0.0140396	0.0147827	0.0150581	0.0238134	0.0203642	0.0209659	0.0217145	1.26543	0.00621643	0.0239697	1.44205	0.528126
1288	Diosmin	2.75	level2			607.167	279.4	NEG	C28H32O15				Shikimates and Phenylpropanoids	Flavonoids	Flavones	GZSOSUNBTXMUFQ-YFAPSIMESA-N	0.0638642	0.0661751	0.0676809	0.0659067	0.134288	0.122661	0.123098	0.126682	1.33516	0.000105527	0.00181723	1.92215	0.942718
1290	15,16-Dihydrotanshinone I	2.75	level2			279.1	74.2	POS	C18H14O3				Polyketides	Naphthalenes	Naphthoquinones	HARGZZNYNSYSGJ-JTQLQIEISA-N	0.0439328	0.0437035	0.0432107	0.0436156	0.0585126	0.0626837	0.0553121	0.0588361	1.30363	0.0182871	0.0519041	1.34897	0.431857
1295	Rosmanol	2.75	level2			369.168	328.7	POS	C20H26O5				Terpenoids	Diterpenoids	Abietane diterpenoids	LCAZOMIGFDQMNC-FORWCCJISA-N	0.0968093	0.105523	0.105479	0.102604	0.00168782	0.000689155	0.00122841	0.0012018	1.33304	0.000734191	0.00573144	0.011713	-6.41575
1296	lycorine	2.75	level2			288.12	197.5	POS	C16H17NO4				Alkaloids	Lysine alkaloids	Amarylidaceae alkaloids	XGVJWXAYKUHDOO-DANNLKNASA-N	0.0176667	0.0172515	0.0171969	0.0173717	0.0263742	0.0245114	0.0264679	0.0257845	1.33108	0.000210769	0.00268531	1.48428	0.569766
1297	ormosanine	2.75	level2			340.27	35.2	POS	C20H35N3				Alkaloids	Lysine alkaloids	Quinolizidine alkaloids	YUKCLPPRYNXRAF-CPPNMTBBSA-N	0.0120841	0.0103067	0.0115978	0.0113295	0.0260124	0.0174803	0.0257033	0.0230653	1.24835	0.0145322	0.0438927	2.03586	1.02564
1298	DL-Norvaline	2.75	level2			116.072	4	NEG	C5H11NO2	HMDB0251527	760-78-1		Amino acids and Peptides	Small peptides	Aminoacids	SNDPXSYFESPGGJ-UHFFFAOYSA-N	0.0229219	0.0251299	0.0248678	0.0243066	0.0212531	0.0210758	0.0200637	0.0207975	1.23062	0.0112611	0.0365401	0.855634	-0.224934
1302	Usambarensine	2.74	level2			433.238	440.1	POS	C29H28N4				Alkaloids	Tryptophan alkaloids	Carboline alkaloids	VUMZOPMHFVDIMF-NLLHOBBWSA-N	0.00557899	0.00723717	0.00727687	0.00669768	0.00896841	0.0127347	0.00997214	0.0105584	1.14716	0.0372763	0.088125	1.57643	0.656661
1303	deltaline	2.74	level2			508.29	393	POS	C27H41NO8				Alkaloids	Pseudoalkaloids	Terpenoid alkaloids	DTTPWCNKTMQMTE-TYNNPWLESA-N	0.0508007	0.0531448	0.052446	0.0521305	0.0706291	0.0616735	0.0652983	0.065867	1.26466	0.00696989	0.0259626	1.2635	0.337429
1309	(2E,4E,14E)-15-(1,3-benzodioxol-5-yl)-N-(2-methylpropyl)pentadeca-2,4,14-trienamide [IIN-based on	2.74	level2			434.267	527.4	POS	C26H37NO3							DRMOIHOBUYFDKF-HMZUNPFJSA-N	0.000915634	0.00132127	0.00149799	0.00124497	0.00248229	0.00179503	0.00313621	0.00247118	1.12761	0.0444256	0.100732	1.98494	0.989092
1312	Ginsenoside Ro	2.74	level2			955.49	412.3	NEG	C48H76O19	HMDB0034534	34367-04-9	C17543	Terpenoids	Triterpenoids	Oleanane triterpenoids	NFZYDZXHKFHPGA-UHFFFAOYSA-N	1.17468e-05	1.2935e-05	1.24167e-05	1.23661e-05	0.0110074	0.0111096	0.0100181	0.0107117	1.34227	0.00105648	0.00722591	866.214	9.75858
1313	1,7,7-trimethylbicyclo[2.2.1]hept-2-yl 4-hydroxy-3-methoxybenzoate	2.74	level2			303.16	392	NEG	C18H24O4				Terpenoids	Monoterpenoids	Camphane monoterpenoids	KTOAGBIQQPGNIR-UHFFFAOYSA-N	0.0404413	0.0346587	0.0313866	0.0354955	0.135459	0.105075	0.112443	0.117659	1.32295	0.00099329	0.00695513	3.31476	1.7289
1314	14-Benzoylaconine	2.74	level2			604.312	390.4	POS	C32H45NO10				Alkaloids	Pseudoalkaloids	Terpenoid alkaloids	DHJXZSFKLJCHLH-BMTFSNIDSA-N	0.00420366	0.00487467	0.00503252	0.00470362	0.0103761	0.00993472	0.0137656	0.0113588	1.29661	0.00576043	0.0227177	2.41491	1.27197
1316	Furostane base -2H + 1O, O-Hex, O-Pen-dHex	2.74	level2			887.464	297.3	NEG	C44H72O18	HMDB0041051	105798-62-7		Terpenoids	Steroids	Furostane steroids	HWYCRLFVQVFKPD-UHFFFAOYSA-N	1.17468e-05	1.2935e-05	1.24167e-05	1.23661e-05	0.355179	0.346262	0.336991	0.346144	1.34237	0.000230031	0.00279634	27991.3	14.7727
1317	arborinine	2.74	level2			286.11	293.2	POS	C16H15NO4	HMDB0030177	5489-57-6	C10643	Alkaloids	Anthranilic acid alkaloids	Acridone alkaloids	ATBZZQPALSPNMF-UHFFFAOYSA-N	0.470129	0.4466	0.453025	0.456585	0.578342	0.575654	0.559996	0.571331	1.32568	0.00022347	0.00277667	1.25131	0.323444
1318	Flavone base + 3O, 1MeO, C-Hex-Hex	2.74	level2			623.161	284.2	NEG	C28H32O16	HMDB0037422	97605-25-9		Shikimates and Phenylpropanoids	Flavonoids	Flavones	AQQFWSYLUDMDBP-UHFFFAOYSA-N	0.0291928	0.0294541	0.0332612	0.030636	0.164842	0.154493	0.154397	0.157911	1.34012	4.2922e-06	0.00038222	5.15441	2.36581
1319	Casticin	2.74	level2			373.093	267.6	NEG	C19H18O8	HMDB0030660	479-91-4		Shikimates and Phenylpropanoids	Flavonoids	Flavonols	PJQLSMYMOKWUJG-UHFFFAOYSA-N	1.36857	1.4301	1.46073	1.4198	3.36541	3.13647	3.30688	3.26959	1.33919	1.50604e-05	0.000670766	2.30285	1.20342
1322	4-Hydroxybenzoylcholine	2.74	level2			224.127	215.5	POS	C12H18NO3	HMDB0029559	5094-31-5					BAPAICNRGIBFJT-UHFFFAOYSA-O	0.0202691	0.0277196	0.0267024	0.024897	0.0458418	0.0426969	0.0437002	0.0440796	1.26634	0.0015751	0.00944806	1.77048	0.824139
1323	O-Methylaloeresin A, 7-	2.74	level2			577.16	97.2	POS	C29H30O11				Polyketides	Chromanes	Chromones	WRLXHKDQSQMWSH-ZTUNSOAWSA-N	0.00220935	0.00216881	0.00214948	0.00217588	0.00465257	0.00385017	0.00396537	0.00415604	1.32084	0.0152624	0.0455053	1.91005	0.933611
1327	Kojic Acid	2.74	level2			143.033	4.7	POS	C6H6O4	HMDB0032923	501-30-4	C14516	Polyketides	Cyclic polyketides	4-pyrone derivatives	BEJNERDRQOWKJM-UHFFFAOYSA-N	0.0252928	0.0368258	0.028726	0.0302815	0.046387	0.0576857	0.0560613	0.053378	1.22118	0.00929407	0.0318563	1.76273	0.817808
1329	Parishin E	2.74	level2			459.114	91.4	NEG	C19H24O13		952068-57-4					XAIUTKHLNZBMEG-HUNOYVTQSA-N	0.0255529	0.0260784	0.0221536	0.024595	0.110204	0.131929	0.126725	0.122953	1.33656	0.000122624	0.00197178	4.99909	2.32167
1330	Lactaldehyde	2.74	level2			73.0295	265.6	NEG	C3H6O2	HMDB0003052	598-35-6	C00424				BSABBBMNWQWLLU-VKHMYHEASA-N	0.0793041	0.0980112	0.091771	0.0896954	0.0732062	0.0756395	0.0722279	0.0736912	1.1213	0.0458339	0.103117	0.821572	-0.283542
1331	Ergovaline	2.74	level2			534.271	129.9	POS	C29H35N5O5				Alkaloids	Tryptophan alkaloids	Ergot alkaloids	BGHDUTQZGWOQIA-VQSKNWBGSA-N	0.00808768	0.0105896	0.0104813	0.00971955	0.00625547	0.00599672	0.00588996	0.00604739	1.25456	0.0439033	0.099826	0.622188	-0.684577
1333	Ala-Ile	2.74	level2			201.124	277.6	NEG	C9H18N2O3	HMDB0028690	29727-65-9					ZSOICJZJSRWNHX-ACZMJKKPSA-N	0.34374	0.318284	0.33205	0.331358	0.762239	0.742013	0.803036	0.769096	1.33882	2.2827e-05	0.000821062	2.32104	1.21477
1335	Nicotinoylcholine	2.74	level2			209.128	255.5	POS	C11H17N2O2							ZMPGJEYFRZCHQC-UHFFFAOYSA-N	0.0352271	0.0312863	0.0360611	0.0341915	0.00812632	0.008328	0.0110393	0.00916454	1.32495	0.000137776	0.00210643	0.268036	-1.8995
1336	8-[4,5-dihydroxy-6-(hydroxymethyl)-3-[3,4,5-trihydroxy-6-(hydroxymethyl)oxan-2-yl]oxyoxan-2-yl]-5,7-dihydroxy-2-(4-hydroxyphenyl)chromen-4-one	2.74	level2			593.15	195.7	NEG	C27H30O15				Shikimates and Phenylpropanoids	Flavonoids	Flavones	FYTOTHFWELWOCG-UHFFFAOYSA-N	0.0192359	0.0198109	0.0190535	0.0193668	0.0816267	0.0753206	0.0968202	0.0845892	1.33553	0.00936629	0.0320174	4.36774	2.12689
1337	5,7-Dimethoxy-4'-hydroxyflavanone	2.74	level2			299.09	181.1	NEG	C17H16O5				Shikimates and Phenylpropanoids	Flavonoids	Flavanones	REBBZOCNEVVAPX-UHFFFAOYSA-N	0.358847	0.426578	0.403774	0.3964	0.0832778	0.0818126	0.106621	0.0905705	1.33083	0.000140775	0.00213212	0.228483	-2.12984
1339	2-acetyl-6-[(3-butanoyl-2,4,6-trihydroxy-5-methylphenyl)methyl]-3,5-dihydroxy-4,4-dimethylcyclohexa-2,5-dien-1-one	2.74	level2			417.156	137.1	NEG	C22H26O8							XRWVZSPWRNDJNS-UHFFFAOYSA-N	0.0404217	0.0380823	0.0397567	0.0394202	0.185009	0.17495	0.177059	0.179006	1.34188	1.5329e-06	0.00026161	4.54097	2.183
1340	FA 18:2+3O	2.74	level2			327.217	134.2	NEG	C18H32O5				Fatty acids	Octadecanoids	Other Octadecanoids	MKYUCBXUUSZMQB-UHFFFAOYSA-N	12.574	15.5586	14.6753	14.2693	3.74751	3.7935	3.4161	3.65237	1.33554	0.00613989	0.0237521	0.25596	-1.96601
1342	Erianin	2.73	level2			319.15	264.5	POS	C18H22O5	HMDB0251918			Shikimates and Phenylpropanoids	Stilbenoids	Monomeric stilbenes	UXDFUVFNIAJEGM-UHFFFAOYSA-N	0.0257608	0.0238864	0.0264087	0.025352	0.105021	0.0746818	0.100328	0.0933434	1.32361	0.0181696	0.0516538	3.68189	1.88045
1344	FA 18:2+O	2.73	level2			293.212	651.6	NEG	C18H30O3				Fatty acids	Fatty Acids and Conjugates	Epoxy fatty acids	HKSDVVJONLXYKL-UHFFFAOYSA-N	0.0349115	0.0266481	0.034067	0.0318755	0.0615585	0.0476663	0.0635197	0.0575815	1.23732	0.0103447	0.0343651	1.80645	0.853156
1345	STIGMASTA-4,22-DIEN-3-ONE	2.73	level2			411.361	632.6	POS	C29H46O	HMDB0302659			Terpenoids	Steroids	Stigmastane steroids	MKGZDUKUQPPHFM-LPJPOILFSA-N	1.24975	1.19235	1.28667	1.24293	2.28682	2.50994	2.24724	2.348	1.33127	0.000213917	0.00270871	1.88909	0.917693
1349	5-(1,2,4a,5-tetramethyl-7-oxo-3,4,8,8a-tetrahydro-2H-naphthalen-1-yl)-3-methylpentanoic acid	2.73	level2			319.228	499.3	NEG	C20H32O3				Terpenoids	Diterpenoids	Colensane and Clerodane diterpenoids	RNWHJFUXZQBBLK-UHFFFAOYSA-N	0.0344861	0.0394155	0.0375281	0.0371432	0.0251516	0.0184195	0.0269149	0.0234953	1.18863	0.00995086	0.033412	0.63256	-0.660726
1350	18Alpha-Glycyrrhetinic Acid	2.73	level2			471.346	487.6	POS	C30H46O4	HMDB0034517	1449-05-4		Terpenoids	Triterpenoids	Oleanane triterpenoids	MPDGHEJMBKOTSU-PMTKVOBESA-N	0.00300445	0.000700315	0.00388953	0.00253143	0.0104089	0.0115282	0.0119542	0.0112971	1.14116	0.00115168	0.0076575	4.46274	2.15793
1351	12-HEPE	2.73	level2			317.212	479.6	NEG	C20H30O3				Fatty acids	Eicosanoids	Hydroxy-hydroperoxyeicosapentaenoic acids	MCRJLMXYVFDXLS-UOLHMMFFSA-N	0.0442531	0.0492908	0.0497706	0.0477715	0.00595053	0.00679812	0.00514845	0.0059657	1.3379	2.16475e-05	0.000802013	0.12488	-3.00139
1355	Caffeoyl putrescin (isomer of 390)	2.73	level2			249.124	308.7	NEG	C13H18N2O3				Alkaloids	Ornithine alkaloids	Polyamines	KTZNZCYTXQYEHT-UHFFFAOYSA-N	0.0166164	0.0195183	0.0152897	0.0171415	0.00789096	0.00849587	0.00948049	0.00862244	1.29942	0.00306663	0.0146899	0.503016	-0.991323
1357	Xanthorhamnin	2.73	level2			769.219	270.8	NEG	C34H42O20				Shikimates and Phenylpropanoids	Flavonoids	Flavonols	NMGVHLDIHNFGQB-OTCPXFHUSA-N	0.0127797	0.0149688	0.0136776	0.0138087	0.0533687	0.0467087	0.0530307	0.051036	1.33606	7.91345e-05	0.00154959	3.69593	1.88594
1358	emetine	2.73	level2			503.289	210.2	POS	C29H40N2O4				Alkaloids	Tyrosine alkaloids	Isoquinoline alkaloids	AUVVAXYIELKVAI-CKBKHPSWSA-N	0.0116281	0.00989674	0.0101868	0.0105705	0.0069775	0.00587757	0.00690893	0.006588	1.27869	0.0034508	0.0159271	0.623242	-0.682137
1359	[(3S,4R,5S)-5-[(2S,3R,4S,5S,6R)-4,5-dihydroxy-6-(hydroxymethyl)-2-(4-hydroxyphenoxy)oxan-3-yl]oxy-3,4-dihydroxyoxolan-3-yl]methyl 4-hydroxybenzoate	2.73	level2			569.151	102.1	NEG	C24H28O13				Terpenoids	Meroterpenoids	Meromonoterpenoids	GDCHGVOUTCXBSI-JALRXJJFSA-N	0.00989146	0.00901863	0.00999193	0.00963401	0.03748	0.0444093	0.0489165	0.0436019	1.33394	0.00899644	0.0311418	4.52584	2.17818
1360	maclurin	2.73	level2			263.06	43.7	POS	C13H10O6	HMDB0032644	519-34-6	C09951	Polyketides	Phloroglucinols	Acyl phloroglucinols	XNWPXDGRBWJIES-UHFFFAOYSA-N	0.899372	0.933423	0.873034	0.901943	0.721532	0.642145	0.577958	0.647212	1.24627	0.00482143	0.0200702	0.717575	-0.478799
1363	5-hexyltetrahydrofuran-2-one	2.73	level2			169.123	416.5	NEG	C10H18O2		706-14-9		Fatty acids	Fatty esters	Lactones	IFYYFLINQYPWGJ-UHFFFAOYSA-N	0.621251	0.610304	0.575305	0.602287	0.43093	0.333217	0.211144	0.325097	1.13066	0.0130542	0.0406571	0.539771	-0.88958
1364	4-hydroxy-7H-furo[3,2-g]chromen-7-one	2.73	level2			203.04	375.1	POS	C11H6O4	HMDB0013679	486-60-2	C00758	Shikimates and Phenylpropanoids	Coumarins	Simple coumarins	GIJHDGJRTUSBJR-UHFFFAOYSA-N	0.0126566	0.0132817	0.0126707	0.0128696	0.00752481	0.00815831	0.00852375	0.00806896	1.32394	0.000177372	0.0024321	0.626977	-0.673516
1366	4-Acetyl-2-methoxyphenyl 6-O-beta-D-xylopyranosyl-beta-D-glucopyranoside	2.73	level2			483.146	227.4	POS	C20H28O12							PBILEZBWIBJOSA-UMSLJHCASA-N	0.00248343	0.00210741	0.00227959	0.00229014	0.00139498	0.00134205	0.00143213	0.00138972	1.31399	0.00128938	0.00826783	0.606826	-0.720645
1369	Ononin	2.73	level2			453.12	461.8	POS	C22H22O9				Shikimates and Phenylpropanoids	Isoflavonoids	Isoflavones	MGJLSBDCWOSMHL-MIUGBVLSSA-N	0.000167959	0.00032649	0.000268299	0.000254249	0.00105745	0.00082795	0.000942148	0.000942514	1.28026	0.0010433	0.0071705	3.70705	1.89027
1371	4'-hydroxy-2',4,6'-trimethoxychalcone	2.73	level2			337.11	391.8	POS	C18H18O5				Shikimates and Phenylpropanoids	Flavonoids	Chalcones	FQZORWOCAANBNC-RMKNXTFCSA-N	0.0406204	0.0397258	0.0418067	0.0407176	0.0892782	0.0919829	0.0871458	0.089469	1.34035	5.69064e-06	0.000428753	2.1973	1.13573
1372	Tiglic_acid	2.73	level2			99.045	389.7	NEG	C5H8O2	HMDB0001470	80-59-1	C08279	Fatty acids	Fatty Acids and Conjugates	Branched fatty acids	UIERETOOQGIECD-ONEGZZNKSA-N	0.119342	0.11127	0.121205	0.117272	0.0603867	0.0655914	0.0622947	0.0627576	1.33382	8.91949e-05	0.00165161	0.535143	-0.902003
1373	platyphylline	2.73	level2			360.18	383.8	POS	C18H27NO5				Alkaloids	Ornithine alkaloids	Pyrrolizidine alkaloids	BTHCJHQOYFUIMG-REYNEDSXSA-N	0.0107838	0.00961447	0.0102237	0.0102073	0.0287539	0.0279851	0.0310857	0.0292749	1.33773	4.30801e-05	0.00112752	2.86803	1.52006
1375	Trifolirhizin	2.73	level2			469.11	357.1	POS	C22H22O10	HMDB0303946		C10538	Shikimates and Phenylpropanoids	Isoflavonoids	Pterocarpan	VGSYCWGXBYZLLE-QEEQPWONSA-N	0.00895255	0.00910356	0.00888653	0.00898088	0.0253913	0.025039	0.0258756	0.0254353	1.34207	3.23714e-07	0.00015003	2.83216	1.5019
1376	Hispiduloside	2.73	level2			463.12	270.8	POS	C22H22O11				Shikimates and Phenylpropanoids	Flavonoids	Flavones	GCLAFEGUXXHIFT-IWLDQSELSA-N	0.00603009	0.00464171	0.00544723	0.00537301	0.00925845	0.0079237	0.0103209	0.00916767	1.24604	0.00908739	0.0313551	1.70625	0.770825
1377	(2R,3R,4S,5S,6R)-2-[2-(4-methoxyphenyl)ethoxy]-6-[[(2S,3R,4S,5S)-3,4,5-trihydroxyoxan-2-yl]oxymethyl]oxane-3,4,5-triol	2.73	level2			469.166	268.2	POS	C20H30O11				Shikimates and Phenylpropanoids	Phenylethanoids (C6-C2)	Phenylethanoids	LQUPEGJECBPTCO-KDRUZJHHSA-N	0.00319978	0.00175028	0.00272185	0.0025573	0.00725528	0.00650673	0.00738427	0.00704876	1.26703	0.000894255	0.00650886	2.75632	1.46275
1380	Naringenin-7-O-beta-D-glucoside	2.73	level2			457.11	237.4	POS	C21H22O10				Shikimates and Phenylpropanoids	Flavonoids	Flavanones	DLIKSSGEMUFQOK-SFTVRKLSSA-N	0.00142141	0.000876784	0.00127228	0.00119016	0.000315621	8.40761e-05	6.83814e-05	0.000156026	1.22552	0.0046499	0.0195762	0.131097	-2.93129
1381	Daphylloside	2.73	level2			469.131	216.1	POS	C19H26O12				Terpenoids	Monoterpenoids	Iridoids monoterpenoids	YSOBQIMODQOGKQ-HOZAMIDDSA-N	0.0156303	0.0124283	0.0157736	0.0146107	0.00528014	0.00272442	0.00446183	0.00415546	1.27319	0.00140191	0.00874862	0.284412	-1.81394
1384	Isorhamnetin-3-O-rutinoside	2.73	level2			623.161	195.7	NEG	C28H32O16				Shikimates and Phenylpropanoids	Flavonoids	Flavonols	UIDGLYUNOUKLBM-GEBJFKNCSA-N	0.00638112	0.00370226	0.00684662	0.00564333	0.0355372	0.0384873	0.045684	0.0399028	1.31429	0.000415126	0.00398504	7.07079	2.82187
1387	Cytisine	2.73	level2			191.117	69	POS	C11H14N2O				Alkaloids	Lysine alkaloids	Pyridine alkaloids	ANJTVLIZGCUXLD-DTWKUNHWSA-N	0.0217719	0.0268069	0.0272677	0.0252822	0.00641406	0.00217504	0.00412205	0.00423705	1.26892	0.000604479	0.00506481	0.16759	-2.57699
1388	alpha-Keto-gamma-(methylthio)butyric_acid	2.73	level2			147.012	66.4	NEG	C5H8O3S	HMDB0001553	583-92-6	C01180	Fatty acids	Fatty Acids and Conjugates	Oxo fatty acids	SXFSQZDSUWACKX-UHFFFAOYSA-N	0.0612295	0.0672627	0.0653219	0.0646047	0.0488128	0.0546227	0.0437816	0.0490724	1.20202	0.0125221	0.0394587	0.759579	-0.396728
1389	Methylgingerol	2.73	level2			307.191	55.5	NEG	C18H28O4	HMDB0029852						CTGAPJBPSCUFRO-UHFFFAOYSA-N	3.91509	4.99158	4.34703	4.4179	2.18337	2.40531	1.97303	2.18724	1.30081	0.00269393	0.0134886	0.495085	-1.01425
1390	4-Hydroxyglutamic acid	2.73	level2			144.03	347.9	NEG	C5H9NO5	HMDB0002273	2485-33-8	C05947	Amino acids and Peptides	Small peptides	Aminoacids	HBDWQSHEVMSFGY-STHAYSLISA-N	0.0430285	0.0383195	0.0444805	0.0419428	0.0351936	0.0339267	0.0335277	0.034216	1.21352	0.0159764	0.0470482	0.815778	-0.293752
1392	Hupehenine	2.72	level2			416.351	375.6	POS	C27H45NO2				Alkaloids	Pseudoalkaloids	Steroidal alkaloids	NEMWYOKGHGSVSC-MSSYMPDSSA-N	6.38392	6.941	6.63221	6.65238	2.86772	2.41573	2.88616	2.7232	1.32922	6.06902e-05	0.00134642	0.409358	-1.28857
1394	Caffeic acid hexoside	2.72	level2			341.087	245.5	NEG	C15H18O9				Shikimates and Phenylpropanoids	Phenylpropanoids (C6-C3)	Cinnamic acids and derivatives	WQSDYZZEIBAPIN-UHFFFAOYSA-N	0.368072	0.311716	0.3655	0.348429	0.275968	0.26737	0.256401	0.26658	1.22759	0.0130788	0.0407035	0.76509	-0.386299
1395	Lonchocarpenin	2.72	level2			449.196	217.6	POS	C27H28O6				Shikimates and Phenylpropanoids	Coumarins	Pyranocoumarins	CCYKXDPVYWRNMH-UHFFFAOYSA-N	0.0211222	0.0201859	0.0209219	0.0207434	0.0175887	0.0167438	0.0178558	0.0173961	1.29482	0.00159835	0.00954251	0.838636	-0.253884
1396	Fragilin	2.72	level2			319.036	208.9	POS	C16H11ClO5				Polyketides	Polycyclic aromatic polyketides	Anthraquinones and anthrones	RTBAOFRCWWQFHB-UHFFFAOYSA-N	0.0029449	0.00280103	0.00388277	0.00320957	0.0072489	0.00696217	0.00609748	0.00676951	1.28444	0.00182767	0.0104207	2.10917	1.07667
1398	HYDRANGENOSIDE C	2.72	level2			577.229	570.3	NEG	C29H38O12				Terpenoids	Monoterpenoids	Secoiridoid monoterpenoids	GGNFGJZLCXTJLH-UHFFFAOYSA-N	0.0354132	0.0505584	0.0418946	0.0426221	0.02408	0.0310609	0.0193565	0.0248325	1.14118	0.0327373	0.0798866	0.58262	-0.779373
1401	Nuciferine	2.72	level2			296.159	501.4	POS	C19H21NO2				Alkaloids	Tyrosine alkaloids	Aporphine alkaloids	ORJVQPIHKOARKV-OAHLLOKOSA-N	0.181957	0.178214	0.19967	0.186614	0.0124857	0.00134939	0.00110105	0.00497871	1.2597	1.82528e-05	0.000736411	0.0266792	-5.22814
1402	9-HODE	2.72	level2			295.227	501.2	NEG	C18H32O3	HMDB0062652	98524-19-7		Fatty acids	Octadecanoids	Other Octadecanoids	NPDSHTNEKLQQIJ-ZJHFMPGASA-N	2.33246	2.53693	2.36887	2.41275	5.8783	5.34001	5.38594	5.53475	1.33619	6.98894e-05	0.00145087	2.29396	1.19784
1405	Chrysanthemic Acid	2.72	level2			167.107	428.9	NEG	C10H16O2				Terpenoids	Monoterpenoids	Irregular monoterpenoids	XLOPRKKSAJMMEW-UHFFFAOYSA-N	0.437919	0.558761	0.519253	0.505311	1.75742	2.03938	1.82879	1.8752	1.33059	0.00011752	0.00192606	3.71097	1.8918
1406	Perillic_acid	2.72	level2			165.092	421.6	NEG	C10H14O2	HMDB0004586	7694-45-3	C11924	Terpenoids	Monoterpenoids	Menthane monoterpenoids	CDSMSBUVCWHORP-UHFFFAOYSA-N	0.0089771	0.00804395	0.00661375	0.00787826	0.0360613	0.0442758	0.0386763	0.0396711	1.33094	0.000226705	0.00277667	5.03552	2.33214
1407	OMEGA-HYDROXYDODECANOIC ACID	2.72	level2			215.165	405.2	NEG	C12H24O3	HMDB0002059	505-95-3	C08317	Fatty acids	Fatty Acids and Conjugates	Hydroxy fatty acids	ZDHCZVWCTKTBRY-UHFFFAOYSA-N	0.0278417	0.0376716	0.0325069	0.0326734	0.0103388	0.0208313	0.0118814	0.0143505	1.18546	0.0133636	0.0413521	0.43921	-1.18702
1408	methyl (2S,4aS,6aR,7R,10aR,10bR)-2-(furan-3-yl)-7-hydroxy-6a,10b-dimethyl-4-oxo-2,4a,5,6,10,10a-hexahydro-1H-benzo[f]isochromene-7-carboxylate	2.72	level2			397.161	398.4	POS	C21H26O6				Terpenoids	Diterpenoids		WWNYZTBMVRRLJM-GOLBOHCDSA-N	0.00138731	0.0012704	2.21181e-06	0.000886639	0.0885371	0.0681123	0.0894831	0.0820442	1.11003	0.00711566	0.0263543	92.5339	6.53191
1410	3-PRENYL-4-HYDROXYACETOPHENONE	2.72	level2			203.107	363.5	NEG	C13H16O2	HMDB0030770	26932-05-8	C10702	Shikimates and Phenylpropanoids			QJAPFSSVKIZTMR-UHFFFAOYSA-N	0.0144209	0.0214484	0.0213158	0.0190617	0.00975009	0.00987416	0.00814314	0.0092558	1.24423	0.0147501	0.0443668	0.48557	-1.04225
1411	Moupinamide	2.72	level2			336.12	322.4	POS	C18H19NO4	HMDB0029365	66648-43-9	C02717	Shikimates and Phenylpropanoids	Phenylpropanoids (C6-C3)	Cinnamic acid amides	NPNNKDMSXVRADT-WEVVVXLNSA-N	0.021379	0.0146274	0.0186692	0.0182252	0.0116939	0.00859664	0.0128605	0.0110503	1.12032	0.0373404	0.0882356	0.606322	-0.721843
1412	Flavone base + 4O, 1Prenyl	2.72	level2			353.102	296.9	NEG	C20H18O6	HMDB0034125	66056-19-7	C10486	Shikimates and Phenylpropanoids	Isoflavonoids	Isoflavones	KCUZCRLRQVRBBV-UHFFFAOYSA-N	0.0164279	0.00687323	0.0181551	0.0138188	0.0343432	0.0362594	0.0363617	0.0356547	1.15278	0.00361505	0.0164356	2.58017	1.36747
1413	Nordiazepam	2.72	level2			269.049	293.4	NEG	C15H11ClN2O	HMDB0060538	1088-11-5	C07486	Alkaloids	Anthranilic acid alkaloids	Benzodiazepine alkaloids	AKPLHCDWDRPJGD-UHFFFAOYSA-N	0.0423274	0.0438543	0.0421276	0.0427697	0.0954852	0.0841161	0.0747254	0.0847755	1.31361	0.0191205	0.053614	1.98214	0.987057
1414	Sinapoyl aldehyde	2.72	level2			207.066	292.6	NEG	C11H12O4	HMDB0258301			Shikimates and Phenylpropanoids	Phenylpropanoids (C6-C3)	Cinnamic acids and derivatives	CDICDSOGTRCHMG-UHFFFAOYSA-N	0.119385	0.0948543	0.102181	0.105474	0.207044	0.176681	0.204368	0.196031	1.29679	0.0017188	0.0100152	1.85858	0.8942
1415	1,9b-dihydroxy-6,6,9a-trimethyl-1,5,5a,7,8,9-hexahydrobenzo[e][2]benzofuran-3-one	2.72	level2			265.144	289	NEG	C15H22O4				Terpenoids	Sesquiterpenoids	Drimane sesquiterpenoids	XLGNZQXMDVSKOV-UHFFFAOYSA-N	0.0438292	0.0321112	0.0538042	0.0432482	0.0206563	0.0211911	0.0178202	0.0198892	1.23699	0.021291	0.0579908	0.459885	-1.12065
1416	Hulupinic acid	2.72	level2			263.128	282.2	NEG	C15H20O4	HMDB0030102			Terpenoids	Meroterpenoids	Polyprenylated cyclic polyketides (Hop meroterpenoids)	KKNXLCGOZLVUHL-UHFFFAOYSA-N	0.0571238	0.0588566	0.0626685	0.0595496	0.0761833	0.0796276	0.0695423	0.0751178	1.23761	0.0100127	0.0335653	1.26143	0.335062
1417	Acetosyringone	2.72	level2			197.08	280.1	POS	C10H12O4				Shikimates and Phenylpropanoids			OJOBTAOGJIWAGB-UHFFFAOYSA-N	0.205513	0.18444	0.200083	0.196679	0.153425	0.162494	0.156738	0.157552	1.27372	0.00464685	0.019568	0.801064	-0.320011
1418	4-Allyl-o-phenylenebis(beta-D-glucopyranoside)	2.72	level2			519.172	265.7	NEG	C21H30O12				Shikimates and Phenylpropanoids	Phenylpropanoids (C6-C3)	Cinnamic acids and derivatives	SFQLDKSMEHBZRN-LWZURRPWSA-N	0.249895	0.260205	0.253471	0.254524	0.0859049	0.0799649	0.080861	0.0822436	1.34106	1.07006e-06	0.000229932	0.323128	-1.62982
1422	Sinapic acid	2.72	level2			223.061	239.1	NEG	C11H12O5				Shikimates and Phenylpropanoids	Phenylpropanoids (C6-C3)	Cinnamic acids and derivatives	PCMORTLOPMLEFB-UHFFFAOYSA-N	0.18866	0.208416	0.199373	0.198816	0.583087	0.594481	0.545082	0.574217	1.33851	1.95053e-05	0.00075996	2.88818	1.53016
1423	[(1aS,1bS,2S,5aR,6S,6aS)-1a-(hydroxymethyl)-2-[(2S,3R,4S,5S,6R)-3,4,5-trihydroxy-6-(hydroxymethyl)oxan-2-yl]oxy-2,5a,6,6a-tetrahydro-1bH-oxireno[5,6]cyclopenta[1,3-c]pyran-6-yl] (E)-3-(4-hydroxy-3-methoxyphenyl)prop-2-enoate	2.72	level2			537.162	227.8	NEG	C25H30O13				Terpenoids	Monoterpenoids	Iridoids monoterpenoids	RMSKZOXJAHOIER-GGKKSNITSA-N	0.0493892	0.028509	0.0303603	0.0360862	0.067875	0.0648659	0.0633281	0.0653563	1.17443	0.0126344	0.0397095	1.81112	0.85688
1424	Corylin	2.72	level2			321.11	211.7	POS	C20H16O4				Shikimates and Phenylpropanoids	Isoflavonoids	Isoflavones	PWAACAMQKVIVPZ-UHFFFAOYSA-N	0.0147881	0.0136381	0.0130609	0.013829	0.026489	0.0238261	0.0246057	0.0249736	1.32601	0.000289081	0.00320262	1.80588	0.852705
1425	Tetrahydropiperine	2.72	level2			290.17	51.5	POS	C17H23NO3				Alkaloids	Lysine alkaloids	Piperidine alkaloids	APZYKUZPJCQGPP-UHFFFAOYSA-N	0.0278883	0.0306168	0.0315069	0.030004	0.046306	0.0433772	0.0468511	0.0455114	1.31295	0.000536816	0.00470438	1.51685	0.601076
1427	cis-Aconitic acid	2.72	level2			173.009	52.7	NEG	C6H6O6	HMDB0000072	4023-65-8	C00417	Fatty acids	Fatty Acids and Conjugates	Dicarboxylic acids	GTZCVFVGUGFEME-IWQZZHSRSA-N	3.50717	3.69003	3.48941	3.5622	5.67907	5.49415	5.65738	5.6102	1.33682	1.90464e-05	0.000751483	1.57493	0.655284
1429	2-[4-[4-[(4-hydroxy-3-methoxy-phenyl)methyl]-3-(hydroxymethyl)tetrahydrofuran-2-yl]-2-methoxy-phenoxy]-6-(hydroxymethyl)tetrahydropyran-3,4,5-triol	2.72	level2			521.202	173.8	NEG	C33H53NO7				Shikimates and Phenylpropanoids	Lignans	Furanoid lignans	KNFOHFRALRKTOJ-UHFFFAOYSA-N	0.3219	0.320821	0.32872	0.323813	0.706663	0.638694	0.691582	0.67898	1.33773	0.00299642	0.0144711	2.09682	1.06821
1432	Voacamine	2.72	level2			705.401	236.8	POS	C43H52N4O5				Alkaloids	Tryptophan alkaloids	Iboga type	VCMIRXRRQJNZJT-JAHAZDFLSA-N	0.00264365	0.00231074	0.00249432	0.0024829	0.00423115	0.00392559	0.00386014	0.00400562	1.31718	0.000522965	0.00462719	1.61328	0.689999
1433	DG(16:0/16:0/0:0)	2.72	level2			591.497	179.5	POS	C35H68O5	HMDB0007098		C00165	Fatty acids	Glycerolipids	Diacylglycerols	JEJLGIQLPYYGEE-XIFFEERXSA-N	0.00493045	0.00475918	0.00446109	0.00471691	0.00644098	0.00660969	0.00678964	0.00661344	1.31816	0.000368411	0.00370339	1.40207	0.487559
1434	Feruloyl Hexoside (isomer of 847)	2.72	level2			355.103	155	NEG	C16H20O9				Shikimates and Phenylpropanoids	Phenylpropanoids (C6-C3)	Cinnamic acids and derivatives	JWRQVQWBNRGGPK-UHFFFAOYSA-N	0.0800613	0.0732379	0.0843684	0.0792225	0.287224	0.226247	0.275364	0.262945	1.32969	0.000632842	0.00521036	3.31907	1.73078
1438	Hydrocotarnine	2.72	level2			222.112	527.4	POS	C12H15NO3	HMDB0033701	550-10-7	C13534	Alkaloids	Tyrosine alkaloids	Amarylidaceae alkaloids	XXANNZJIZQTCBP-UHFFFAOYSA-N	0.0504182	0.0548351	0.0566118	0.053955	0.0656369	0.066765	0.063659	0.0653536	1.2501	0.00514844	0.0210061	1.21126	0.27651
1440	Silychristin	2.72	level2			481.119	224.2	NEG	C25H22O10				Shikimates and Phenylpropanoids	Flavonoids	Flavonolignans	BMLIIPOXVWESJG-LMBCONBSSA-N	0.0100749	0.0104627	0.0107016	0.0104131	0.00687238	0.00661401	0.0063284	0.00660493	1.33142	9.35539e-05	0.00169455	0.634292	-0.656782
1441	Petiline	2.72	level2			414.336	223.3	POS	C27H43NO2				Alkaloids	Pseudoalkaloids	Steroidal alkaloids	QAGPPGDCPAPQLW-HAQROMNMSA-N	0.00627538	0.006895	0.00738916	0.00685318	0.00881824	0.00816712	0.00792329	0.00830288	1.15426	0.0257275	0.0668034	1.21154	0.276838
1443	(2R,3S,4S,5R,6R)-2-[[(2R,3R,4R,5S)-3,4-dihydroxy-5-(hydroxymethyl)oxolan-2-yl]oxymethyl]-6-[(2E)-3,7-dimethylocta-2,6-dienoxy]oxane-3,4,5-triol	2.72	level2			466.264	200.2	POS	C21H36O10				Terpenoids	Monoterpenoids	Acyclic monoterpenoids	AWDKYYYAAQQLEF-XRSPUIAPSA-N	0.00800752	0.0072497	0.00783103	0.00769608	0.0149809	0.0132215	0.0156074	0.0146033	1.32132	0.000772191	0.00591344	1.89749	0.924095
1444	Garcinone D	2.72	level2			451.171	194.9	POS	C24H28O7	HMDB0033332	107390-08-9		Shikimates and Phenylpropanoids	Xanthones	Plant xanthones	TYALNCRUIKOKGP-UHFFFAOYSA-N	0.00415572	0.00345646	0.00372358	0.00377859	0.00530649	0.00434929	0.00573558	0.00513046	1.12782	0.0417929	0.0960939	1.35777	0.441241
1446	8-hydroxy-6,7-dimethoxy-2H-chromen-2-one	2.72	level2			223.06	135.2	POS	C11H10O5				Shikimates and Phenylpropanoids	Coumarins	Simple coumarins	QNFBKOHHLAWWTC-UHFFFAOYSA-N	0.0649709	0.0717162	0.071475	0.0693874	0.0280855	0.0288154	0.0290975	0.0286661	1.33891	0.00252553	0.0129298	0.413132	-1.27533
1447	p-Coumaraldehyde	2.72	level2			147.045	121.6	NEG	C9H8O2				Shikimates and Phenylpropanoids	Phenylpropanoids (C6-C3)		CJXMVKYNVIGQBS-UHFFFAOYSA-N	0.440909	0.385093	0.453112	0.426371	0.130105	0.126053	0.116736	0.124298	1.33591	0.00014376	0.00215729	0.291525	-1.77831
1448	(-)-Bilobalide	2.72	level2			325.092	121.5	NEG	C15H18O8	HMDB0242203			Terpenoids			MOLPUWBMSBJXER-UHFFFAOYSA-N	0.140313	0.127685	0.137324	0.135107	0.0662529	0.059994	0.0498153	0.0586874	1.31316	0.000236657	0.00283939	0.434377	-1.20298
1451	2,7-Octadienoic_acid,_6-hydroxy-2,6-dimethyl-,_(1aR,1bS,2S,5aS,6R,6aS)-2-(beta-D-glucopyranosyloxy)-1a,1b,2,5a,6,6a-hexahydro-5a-hydroxy-1a-methyloxireno[4,5]cyclopenta[1,2-c]pyran-6-yl_ester,_(2E,6S)-	2.72	level2			551.209	65.1	POS	C25H36O12				Terpenoids	Monoterpenoids	Iridoids monoterpenoids	PRWWZXHOHQRKDQ-SVDQWWJBSA-N	0.00113758	2.20454e-06	0.000928744	0.000689511	0.0193402	0.0118965	0.0238153	0.0183506	1.02889	0.0354807	0.0848619	26.614	4.73411
1452	BENZOYLFORMIC ACID	2.72	level2			149.024	54	NEG	C8H6O3	HMDB0001587	611-73-4	C02137	Shikimates and Phenylpropanoids	Flavonoids	Chalcones	FAQJJMHZNSSFSM-UHFFFAOYSA-N	0.0394649	0.0420715	0.0418179	0.0411181	0.0124238	0.00723146	0.0116819	0.0104457	1.30287	7.28772e-05	0.0014832	0.254041	-1.97687
1453	3-Hexen-1-ol O-b-D-glucopyranoside	2.72	level2			285.131	48.8	POS	C12H22O6				Fatty acids	Fatty acyl glycosides	Fatty acyl glycosides of mono- and disaccharides	OZIPFYKAIOOVEJ-ODWUMMNUSA-N	1.94999	1.7544	1.74257	1.81565	0.699876	0.424777	0.733631	0.619428	1.27599	0.000545475	0.004747	0.34116	-1.55148
1454	Pyrimidinol	2.72	level2			153.102	33.7	POS	C8H12N2O	HMDB0245733			Alkaloids			AJPIUNPJBFBUKK-UHFFFAOYSA-N	0.00668621	0.00784519	0.00829937	0.00761025	0.00937703	0.0119472	0.0103988	0.0105743	1.15723	0.0289073	0.0727807	1.38948	0.47455
1456	(2S,3R,5R,10R,13R,14S,17S)-2,3,14-trihydroxy-10,13-dimethyl-17-[(1R,2R)-1,2,4,5-tetrahydroxy-1,5-dimethyl-hexyl]-2,3,4,5,9,11,12,15,16,17-decahydro-1H-cyclopenta[a]phenanthren-6-one	2.72	level2			477.286	33.8	NEG	C27H44O8				Terpenoids	Steroids	Ecdysteroids	NXKBQUXBPMOHPK-FICAPFPSSA-N	0.0277747	0.0218977	0.0251045	0.0249256	0.0580401	0.0463654	0.0641596	0.0561884	1.28971	0.00469527	0.0197014	2.25424	1.17264
1457	Rubiarbonol A 7-acetate	2.72	level2			515.374	32	NEG	C32H52O5		1338588-80-9		Terpenoids	Triterpenoids	Fernane and Arborinane triterpenoids	XLTANSFXBPNHCI-BNXFXOOGSA-N	0.0620711	0.0820435	0.0563233	0.0668127	0.0935291	0.101986	0.10735	0.100955	1.16797	0.0176517	0.0505719	1.51102	0.59552
1458	Neoreticulatacin_A	2.71	level2			593.513	620.1	POS	C37H68O5	HMDB0034924	166022-35-1		Polyketides	Linear polyketides	Acetogenins	BDGWQMLWIGDEKO-UHFFFAOYSA-N	0.0215124	0.0219635	0.0179505	0.0204755	0.0654157	0.0625793	0.0558516	0.0612822	1.32891	0.00019411	0.00256227	2.99296	1.58157
1460	BETA-Febrifugine	2.71	level2			302.149	260.5	POS	C16H19N3O3				Alkaloids	Anthranilic acid alkaloids	Quinazoline alkaloids	FWVHWDSCPKXMDB-GJZGRUSLSA-N	0.0117357	0.0124105	0.0123602	0.0121688	0.0156593	0.0152179	0.0143202	0.0150658	1.28539	0.00299015	0.0144498	1.23807	0.30809
1461	Ecgonine-methyl-ester (EME)	2.71	level2			200.128	253.1	POS	C10H17NO3	HMDB0006406	7143-09-1	C12448	Alkaloids	Ornithine alkaloids	Tropane alkaloids	QIQNNBXHAYSQRY-ABIFROTESA-N	0.0458817	0.0424513	0.0422142	0.0435157	0.0619253	0.0566032	0.0616668	0.0600651	1.30471	0.00139923	0.00873994	1.38031	0.464991
1465	Pinolenic acid	2.71	level2			277.217	705	NEG	C18H30O2	HMDB0340922			Fatty acids	Fatty Acids and Conjugates	Unsaturated fatty acids	HXQHFNIKBKZGRP-URPRIDOGSA-N	0.014678	0.0146193	0.0142922	0.0145298	0.0117258	0.00899934	0.0115452	0.0107568	1.16984	0.0480254	0.106796	0.740325	-0.43377
1467	Undecanedioic acid	2.71	level2			215.128	378	NEG	C11H20O4	HMDB0000888	1852-04-6		Fatty acids	Fatty Acids and Conjugates	Dicarboxylic acids	LWBHHRRTOZQPDM-UHFFFAOYSA-N	0.216999	0.260545	0.242909	0.240151	0.312232	0.339427	0.279145	0.310268	1.14476	0.0311953	0.0770419	1.29197	0.369574
1469	Hematoxylin	2.71	level2			325.071	296	POS	C16H14O6				Shikimates and Phenylpropanoids			WZUVPPKBWHMQCE-XJKSGUPXSA-N	0.0132873	0.0167854	0.0121751	0.0140826	0.0281286	0.0336192	0.0317778	0.0311752	1.29428	0.00130602	0.00834193	2.21374	1.14648
1471	Isorhamnetin-3-glucoside	2.71	level2			477.107	236.5	NEG	C22H22O12	HMDB0302682			Shikimates and Phenylpropanoids	Flavonoids	Flavonols	CQLRUIIRRZYHHS-LFXZADKFSA-N	0.0353123	0.0366222	0.0393697	0.0371014	0.0675641	0.060542	0.060555	0.062887	1.32013	0.000603458	0.00506003	1.695	0.761289
1474	Karanjin	2.71	level2			315.063	186.1	POS	C18H12O4	HMDB0253763			Shikimates and Phenylpropanoids	Flavonoids	Flavonols	LKPQNZRGGNOPPU-UHFFFAOYSA-N	0.00669772	0.00777077	0.00621402	0.00689417	0.0141772	0.0168786	0.0129068	0.0146542	1.29465	0.00350881	0.0161129	2.12559	1.08787
1476	[2-hydroxy-3-[hydroxy-[2-hydroxy-3-[3,4,5-trihydroxy-6-[[3,4,5-trihydroxy-6-(hydroxymethyl)oxan-2-yl]oxymethyl]oxan-2-yl]oxypropoxy]phosphoryl]oxypropyl] 12-methyltetradecanoate	2.71	level2			793.364	601.4	NEG	C33H63O19P				Fatty acids	Glycerophospholipids		YOBDBZVQMUJKOX-UHFFFAOYSA-N	0.00791253	0.00507817	0.0095772	0.00752263	0.0162315	0.0175439	0.0171667	0.0169807	1.226	0.002309	0.0121688	2.25728	1.17459
1478	Maltol	2.71	level2			127.039	274.2	POS	C3H6O3	HMDB0030776	118-71-8	C11918	Polyketides	Cyclic polyketides	4-pyrone derivatives	XPCTZQVDEJYUGT-UHFFFAOYSA-N	0.00419259	0.00566771	0.00569599	0.00518543	0.0145771	0.0144662	0.0133947	0.014146	1.31345	0.00013615	0.00209141	2.72803	1.44786
1479	Kainic acid	2.71	level2			214.107	138.3	POS	C10H15NO4				Alkaloids	Ornithine alkaloids	Pyrrolidine alkaloids	VLSMHEGGTFMBBZ-OOZYFLPDSA-N	0.0111848	0.0102299	0.0118931	0.0111026	0.0151429	0.0186817	0.0161504	0.0166583	1.25566	0.00865474	0.0302751	1.5004	0.585347
1481	Methyl nicotinic acid	2.71	level2			138.055	362.3	POS	C7H7NO2	HMDB0029806	93-60-7		Alkaloids	Nicotinic acid alkaloids	Pyridine alkaloids	YNBADRVTZLEFNH-UHFFFAOYSA-N	0.0312513	0.0281605	0.0330534	0.0308218	0.00819205	0.00920343	0.0110052	0.00946688	1.32463	0.000204931	0.00264628	0.307149	-1.70299
1482	Benzoic acid + 1O, 2MeO, O-Hex	2.71	level2			359.097	343.2	NEG	C15H20O10							CIYLTHWUJCCASO-UHFFFAOYSA-N	0.0423594	0.0442024	0.0458775	0.0441464	0.17124	0.180777	0.171577	0.174531	1.34099	2.40923e-06	0.000307969	3.95346	1.98312
1484	Trans-Zeatin-9-glucoside	2.71	level2			382.171	281.2	POS	C16H23N5O6				Alkaloids	Pseudoalkaloids	Purine alkaloids	VYRAJOITMBSQSE-HNVSNYHQSA-N	0.00412439	0.00423318	0.00346883	0.00394213	0.0227386	0.019908	0.0221585	0.0216017	1.33759	3.90291e-05	0.00107194	5.47969	2.4541
1485	Homostachydrine	2.71	level2			158.117	280.8	POS	C8H15NO2	HMDB0033433	472-22-0	C08283				XULZWQRXYTVUTE-ZETCQYMHSA-N	0.0321671	0.0292527	0.0319222	0.031114	0.0435916	0.0375251	0.0390809	0.0400658	1.23501	0.0118914	0.0379975	1.28771	0.364808
1486	Methylnissolin-3-O-glucoside	2.71	level2			485.141	268.2	POS	C23H26O10				Shikimates and Phenylpropanoids	Isoflavonoids	Pterocarpan	PCIXSTFFMHVOMF-UHFFFAOYSA-N	0.00159424	0.000894998	0.00105559	0.00118161	0.00338943	0.00320586	0.00346283	0.00335271	1.2792	0.000643484	0.00526683	2.83741	1.50457
1487	Tetramethylpyrazine	2.71	level2			137.107	238	POS	C8H12N2	HMDB0036584	1124-11-4		Alkaloids	Tetramate alkaloids	Pyrazine and Piperazine alkaloids	FINHMKGKINIASC-UHFFFAOYSA-N	0.0025344	0.00291362	0.00200102	0.00248301	0.0088085	0.00847522	0.00836798	0.00855057	1.32194	3.34785e-05	0.000994871	3.44363	1.78393
1489	Convolidine	2.71	level2			278.138	37.9	POS	C15H19NO4				Alkaloids	Ornithine alkaloids	Tropane alkaloids	GWWGRYGNRKFSSX-UHFFFAOYSA-N	0.100375	0.116074	0.116764	0.111071	0.0111111	0.00401484	0.00597765	0.00703454	1.31302	5.50402e-05	0.00127891	0.0633335	-3.98089
1490	8-[4,5-dihydroxy-6-(hydroxymethyl)-3-(3,4,5-trihydroxy-6-methyloxan-2-yl)oxyoxan-2-yl]-5,7-dihydroxy-2-(4-methoxyphenyl)chromen-4-one [IIN-based	2.71	level2			615.173	492.9	POS	C28H32O14	HMDB0037540	64271-10-9		Shikimates and Phenylpropanoids	Flavonoids	Flavones	AOXGLIJSZLOQNZ-UHFFFAOYSA-N	0.000306992	0.000280615	0.000263193	0.0002836	0.000452199	0.000355924	0.000502352	0.000436825	1.19025	0.0267938	0.0688473	1.54029	0.623198
1493	Quercitrin	2.71	level2			471.089	359.7	POS	C21H20O11	HMDB0033751	522-12-3	C01750	Shikimates and Phenylpropanoids	Flavonoids	Flavonols	OXGUCUVFOIWWQJ-HQBVPOQASA-N	0.000255115	0.000161376	0.000183879	0.000200123	0.000743627	0.000625281	0.000607316	0.000658742	1.30413	0.000862548	0.00635905	3.29168	1.71882
1494	Benzyl beta-D-glucopyranosyl-(1-.2)-[beta-D-xylopyranosyl-(1-.6)]-beta-D-glucopyranoside	2.71	level2			587.193	317.9	POS	C24H36O15							RNYROHPATJSIAO-LGLSMWBYSA-N	0.000743765	0.000347199	0.000416616	0.000502527	0.00177694	0.00148468	0.00198405	0.00174856	1.25776	0.00277213	0.0137477	3.47953	1.79889
1496	Demethoxycentaureidin 7-O-rutinoside	2.71	level2			637.176	294.8	NEG	C29H34O16				Shikimates and Phenylpropanoids	Flavonoids	Flavones	PYPKJBUJNZMSTH-UHFFFAOYSA-N	0.00471466	0.00357618	0.00438424	0.00422503	0.0134955	0.0130173	0.016322	0.0142783	1.32223	0.00075499	0.00582983	3.37945	1.75679
1497	Dioscin	2.71	level2			869.488	259.9	POS	C45H72O16				Terpenoids	Steroids	Spirostane steroids	VNONINPVFQTJOC-ZGXDEBHDSA-N	0.0019625	0.00191616	0.00211777	0.00199881	0.00432022	0.00420566	0.00574394	0.00475661	1.30437	0.0291459	0.0732448	2.37972	1.25079
1500	mangiferin	2.71	level2			423.089	198.1	POS	C19H18O11				Shikimates and Phenylpropanoids	Xanthones	Plant xanthones	AEDDIBAIWPIIBD-XQOGOWKJSA-N	0.0865714	0.0990664	0.0907318	0.0921232	0.195115	0.197577	0.205759	0.199483	1.33385	2.53277e-05	0.000866227	2.1654	1.11463
1501	2-[[7-hydroxy-1-(4-hydroxy-3,5-dimethoxyphenyl)-3-(hydroxymethyl)-6,8-dimethoxy-1,2,3,4-tetrahydronaphthalen-2-yl]methoxy]-6-(hydroxymethyl)oxane-3,4,5-triol	2.71	level2			600.264	177	POS	C28H38O13	HMDB0038922	87585-32-8		Shikimates and Phenylpropanoids	Lignans	Arylnaphthalene and aryltetralin lignans	PQQRNPDHSJDAGV-UHFFFAOYSA-N	0.402383	0.208964	0.355719	0.322355	0.584863	0.540424	0.612343	0.57921	1.12438	0.0142865	0.0433611	1.79681	0.845435
1503	INDOLE-3-ACETAMIDE	2.71	level2			175.086	148.5	POS	C10H10N2O	HMDB0029739	879-37-8	C02693	Alkaloids	Tryptophan alkaloids	Simple indole alkaloids	ZOAMBXDOGPRZLP-UHFFFAOYSA-N	0.0138482	0.0152109	0.0182329	0.015764	0.0306863	0.0312986	0.0331771	0.0317207	1.30484	0.000438429	0.0041294	2.01222	1.00879
1504	Dehydrosalsolidine	2.71	level2			206.117	114.1	POS	C12H15NO2				Alkaloids	Tyrosine alkaloids	Isoquinoline alkaloids	VASUQTGZAPZKFK-UHFFFAOYSA-N	0.0565313	0.0577977	0.0547283	0.0563525	0.0709915	0.0763005	0.0699676	0.0724199	1.30232	0.00172983	0.0100553	1.28512	0.361907
1505	2-Hydroxyquinoline	2.71	level2			146.06	63.5	POS	C9H7NO				Alkaloids	Tryptophan alkaloids	Quinoline alkaloids	LISFMEBWQUVKPJ-UHFFFAOYSA-N	0.0199467	0.0199739	0.0213348	0.0204185	0.0049236	0.00284075	0.00257963	0.00344799	1.30986	4.10596e-05	0.00110157	0.168866	-2.56605
1506	N-METHYLISOLEUCINE	2.71	level2			146.117	27.9	POS	C7H15NO2				Amino acids and Peptides	Small peptides	Aminoacids	KSPIYJQBLVDRRI-UHFFFAOYSA-N	0.0013287	0.00137929	0.00113198	0.00127999	0.00176547	0.00163818	0.00162499	0.00167621	1.20903	0.0106869	0.0351767	1.30955	0.389075
1509	N-Formylglycine	2.71	level2			102.019	125.8	NEG	C3H5NO3	HMDB0255145	2491-15-8		Amino acids and Peptides	Small peptides	Aminoacids	UGJBHEZMOKVTIM-UHFFFAOYSA-N	0.354018	0.363821	0.212972	0.310271	0.726252	0.637111	1.03167	0.798345	1.2138	0.0193885	0.0541685	2.57306	1.36348
1511	Vindoline	2.7	level2			457.231	654.1	POS	C25H32N2O6				Alkaloids	Tryptophan alkaloids	Aspidosperma type	CXBGOBGJHGGWIE-ACSXSLCXSA-N	0.0194542	0.0176736	0.0206815	0.0192698	0.0327698	0.0337211	0.0370051	0.0344987	1.31608	0.000604567	0.00506515	1.7903	0.8402
1517	Dimethyl phthalate	2.7	level2			195.065	242.9	POS	C10H10O4	HMDB0251388		C11233	Shikimates and Phenylpropanoids	Phenolic acids (C6-C1)	Simple phenolic acids	NIQCNGHVCWTJSM-UHFFFAOYSA-N	0.026563	0.0242291	0.0239421	0.0249114	0.0683797	0.0676544	0.0655712	0.0672018	1.33946	3.6438e-06	0.000354102	2.69763	1.4317
1518	Nicotyrine	2.7	level2			159.091	208.6	POS	C10H10N2	HMDB0255591		C10161	Alkaloids	Nicotinic acid alkaloids	Pyridine alkaloids	RYFOJXFXERAMLS-UHFFFAOYSA-N	0.0757176	0.0698064	0.0740845	0.0732028	0.135055	0.142001	0.132308	0.136455	1.33552	4.80247e-05	0.0011927	1.86406	0.89845
1519	2-Propylpyridine	2.7	level2			122.096	122.9	POS	C8H11N	HMDB0032497	622-39-9		Alkaloids	Nicotinic acid alkaloids	Pyridine alkaloids	OIALIKXMLIAOSN-UHFFFAOYSA-N	0.13264	0.127367	0.116624	0.125544	0.324626	0.345993	0.320706	0.330442	1.33694	2.36745e-05	0.000835734	2.63209	1.39621
1520	2-Pyrrolidinone	2.7	level2			86.0598	44.4	POS	C4H7NO	HMDB0002039	616-45-5	C11118	Alkaloids	Ornithine alkaloids	Pyrrolidine alkaloids	HNJBEVLQSNELDL-UHFFFAOYSA-N	0.813754	0.747962	0.770551	0.777422	1.16542	1.14145	1.07742	1.1281	1.32132	0.000423114	0.00403246	1.45108	0.537122
1521	Betonicine	2.7	level2			160.096	44.3	POS	C7H13NO3	HMDB0029412	515-25-3	C08269				MUNWAHDYFVYIKH-RITPCOANSA-N	0.499945	0.486778	0.498834	0.495185	0.250401	0.238004	0.250832	0.246412	1.34018	1.96281e-06	0.000282267	0.497616	-1.00689
1523	N-Nitrosopyrrolidine (NPYR)	2.7	level2			101.071	650.7	POS	C4H8N2O	HMDB0031642	930-55-2	C19285	Alkaloids	Lysine alkaloids	Piperidine alkaloids	WNYADZVDBIBLJJ-UHFFFAOYSA-N	0.0235312	0.0206752	0.0216297	0.0219454	0.0258878	0.0288737	0.0303834	0.0283816	1.21444	0.0147019	0.0442637	1.29329	0.37104
1525	Dioctylphthalate	2.7	level2			391.283	584.7	POS	C24H38O4	HMDB0251427		C14227	Shikimates and Phenylpropanoids	Phenolic acids (C6-C1)	Shikimic acids and derivatives	MQIUGAXCHLFZKX-UHFFFAOYSA-N	0.149089	0.121659	0.155372	0.14204	0.231373	0.200684	0.186602	0.20622	1.18943	0.0187303	0.0528268	1.45184	0.537886
1530	MGMG 18:3	2.7	level2			513.306	485.5	NEG	C27H46O9				Fatty acids	Glycerolipids	Glycosylmonoacylglycerols	HUSISCNTLUEZCN-UHFFFAOYSA-N	0.0116193	0.00992239	0.0112444	0.0109287	0.00389619	0.00619259	0.00545949	0.00518275	1.25372	0.00250401	0.0128549	0.474233	-1.07633
1531	13-OxoODE	2.7	level2			317.208	470.8	POS	C18H30O3	HMDB0004668		C14765	Fatty acids	Fatty Acids and Conjugates	Oxo fatty acids	JHXAZBBVQSRKJR-BSZOFBHHSA-N	0.0291297	0.0256993	0.0282659	0.0276983	0.0545851	0.0650672	0.0581035	0.0592519	1.32383	0.000628272	0.00518564	2.13919	1.09707
1538	Carbendazim	2.7	level2			192.076	258.7	POS	C9H9N3O2	HMDB0031769	10605-21-7	C10897	Alkaloids	Anthranilic acid alkaloids	Phenazine alkaloids	TWFZGCMQGLPBSX-UHFFFAOYSA-N	2.64276	2.82623	2.89327	2.78742	0.050467	0.0446198	0.0390465	0.0447111	1.34145	0.00072903	0.00570353	0.0160403	-5.96215
1539	Ibuprofen	2.7	level2			207.137	257.2	POS	C13H18O2	HMDB0001925	15687-27-1	C01588				HEFNNWSXXWATRW-UHFFFAOYSA-N	0.275182	0.29565	0.291147	0.287326	0.269647	0.254653	0.247625	0.257308	1.15134	0.0288167	0.0726127	0.895527	-0.15919
1540	Isoliquiritin	2.7	level2			441.115	250.5	POS	C21H22O9				Shikimates and Phenylpropanoids	Flavonoids	Chalcones	YNWXJFQOCHMPCK-LXGDFETPSA-N	0.0152561	0.011782	0.0144972	0.0138451	0.00491618	0.00490994	0.0053414	0.00505584	1.32346	0.0128791	0.0402735	0.365172	-1.45335
1543	(R)-Campholenic_aldehyde	2.7	level2			153.127	217.6	POS	C10H16O	HMDB0034973			Terpenoids	Monoterpenoids		OGCGGWYLHSJRFY-UHFFFAOYSA-N	0.0250567	0.0287058	0.0267717	0.0268448	0.0340029	0.0319699	0.0301396	0.0320374	1.15377	0.0277053	0.0705591	1.19343	0.255119
1546	Tetradecanedioic acid	2.7	level2			239.165	431.1	NEG	C14H26O4	HMDB0000872	821-38-5		Fatty acids	Fatty Acids and Conjugates	Dicarboxylic acids	HQHCYKULIHKCEB-UHFFFAOYSA-N	0.0829294	0.0951358	0.139857	0.105974	0.165525	0.179758	0.158577	0.167953	1.11626	0.0280502	0.0712024	1.58485	0.664346
1548	L-Arginine	2.7	level2			175.119	585	POS	C30H48O5	HMDB0000517	74-79-3	C00062	Amino acids and Peptides	Small peptides	Aminoacids	ODKSFYDXXFIFQN-BYPYZUCNSA-N	1.86495	1.87446	1.8466	1.862	2.2884	2.42827	2.41547	2.37738	1.32523	0.000342986	0.00354298	1.27679	0.352517
1551	SCOPOLINE	2.7	level2			156.101	405.8	POS	C8H13NO2				Alkaloids	Ornithine alkaloids	Tropane alkaloids	MEGPURSNXMUDAE-IKTQEEBSSA-N	0.0627304	0.042447	0.0455779	0.0502517	0.0115241	0.015231	0.0265179	0.0177576	1.1992	0.0137809	0.0422833	0.353374	-1.50073
1552	HYDRASTININE	2.7	level2			208.096	361.1	POS	C11H13NO3				Alkaloids	Tyrosine alkaloids	Isoquinoline alkaloids	YOJQZPVUNUQTDF-UHFFFAOYSA-N	0.00932237	0.00907422	0.00749206	0.00862955	0.0351484	0.0350685	0.0295649	0.0332606	1.33112	0.000219374	0.00275222	3.85427	1.94646
1556	ORSELLINIC ACID, ETHYL ESTER	2.7	level2			197.08	177.6	POS	C10H12O4				Shikimates and Phenylpropanoids	Phenolic acids (C6-C1)	Shikimic acids and derivatives	UQSRXQMIXSZGLA-UHFFFAOYSA-N	0.00838895	0.00632369	0.00803966	0.0075841	0.0307949	0.0299872	0.0314879	0.0307566	1.33226	7.32183e-06	0.000482106	4.05541	2.01985
1557	Cis-Zeatin-riboside	2.7	level2			352.161	146.2	POS	C15H21N5O5				Alkaloids	Pseudoalkaloids	Purine alkaloids	GOSWTRUMMSCNCW-BAJUWZQUSA-N	0.00383989	0.00242135	0.00321524	0.00315883	0.0156668	0.00963607	0.0131177	0.0128069	1.29429	0.00579285	0.0228021	4.05431	2.01946
1559	Gigantine	2.7	level2			238.143	114.3	POS	C13H19NO3				Alkaloids	Tyrosine alkaloids	Aporphine alkaloids	HRJQUAXWKYISJC-QMMMGPOBSA-N	0.0136249	0.0136203	0.0133217	0.0135223	0.0152238	0.0161204	0.0151358	0.0154933	1.2796	0.00395475	0.0174916	1.14576	0.196305
1560	Feruloyl O-methyldopamine	2.7	level2			344.148	99.5	POS	C19H21NO5				Shikimates and Phenylpropanoids	Phenylpropanoids (C6-C3)	Cinnamic acid amides	ACSWAJLDOHJFNA-UHFFFAOYSA-N	0.0317421	0.0238309	0.0264578	0.0273436	0.0166346	0.0171293	0.0180262	0.0172634	1.25163	0.0129682	0.0404585	0.631349	-0.66349
1561	Nigellicine	2.7	level2			247.107	69.2	POS	C13H14N2O3	HMDB0030269	98063-20-8		Alkaloids			FEJTUHSIRAJLOJ-UHFFFAOYSA-N	0.0136673	0.0164316	0.0144814	0.0148601	2.72839e-06	2.74836e-06	0.000278954	9.48102e-05	1.23017	0.00277925	0.0137705	0.00638017	-7.29219
1563	1,8-Heptadecadiene-4,6-diyne-3,10-diol	2.7	level2			261.184	33.9	POS	C17H24O2	HMDB0038781	63910-76-9					DSVMWGREWREVQQ-QINSGFPZSA-N	0.0834762	0.0823525	0.0881441	0.0846576	0.00456075	0.00553551	0.00422884	0.00477503	1.34035	1.5971e-06	0.000264938	0.0564041	-4.14806
1564	Diosbulbin B	2.7	level2			367.109	483.6	POS	C19H20O6				Terpenoids	Diterpenoids	Colensane and Clerodane diterpenoids	QEANLIISUSNNDX-YHPVUIEZSA-N	0.00697865	0.00671792	0.00732286	0.00700648	0.0111179	0.0128356	0.0111453	0.0116996	1.31328	0.00139215	0.00870768	1.66983	0.739699
1565	Pyridine	2.7	level2			80.0493	391.8	POS	C5H5N	HMDB0000926	110-86-1	C00747	Alkaloids	Nicotinic acid alkaloids	Pyridine alkaloids	JUJWROOIHBZHMG-UHFFFAOYSA-N	0.0311248	0.0292321	0.0307472	0.030368	0.0431905	0.0413831	0.0419087	0.0421608	1.3301	0.000116733	0.00191699	1.38833	0.473347
1566	alpha-Methyl-DL-serine	2.7	level2			118.051	391.1	NEG	C4H9NO3				Amino acids and Peptides	Small peptides	Aminoacids	CDUUKBXTEOFITR-UHFFFAOYSA-N	0.302361	0.284892	0.306845	0.298033	0.343947	0.331774	0.329986	0.335236	1.22845	0.00968117	0.0327727	1.12483	0.169706
1569	(3S,4R,4aS)-3-[(2S,3R,4S,5S,6R)-6-[[(2R,3R,4R)-3,4-dihydroxy-4-(hydroxymethyl)oxolan-2-yl]oxymethyl]-3,4,5-trihydroxyoxan-2-yl]oxy-4-ethenyl-4,4a,5,6-tetrahydro-3H-pyrano[3,4-c]pyran-8-one	2.7	level2			513.157	267.5	POS	C21H30O13				Terpenoids	Monoterpenoids	Secoiridoid monoterpenoids	JNPXCTROEJQHKD-APAPHXOESA-N	0.00593574	0.00413066	0.00426287	0.00477642	0.000876308	0.00091099	0.00115573	0.00098101	1.31963	0.0206578	0.0567156	0.205386	-2.28359
1571	Pseudopelletierine	2.7	level2			154.122	225.8	POS	C9H15NO	HMDB0034580	552-70-5	C10865	Alkaloids	Lysine alkaloids	Piperidine alkaloids	RHWSKVCZXBAWLZ-UHFFFAOYSA-N	0.00963917	0.0168555	0.0106637	0.0123861	0.024214	0.0323341	0.0246287	0.0270589	1.20463	0.013408	0.0414509	2.18462	1.12738
1572	Angustifoline	2.7	level2			235.18	219.4	POS	C14H22N2O				Alkaloids	Lysine alkaloids	Quinolizidine alkaloids	VTIPIBIDDZPDAV-IFWUJCSASA-N	0.00466338	0.00444659	0.00494648	0.00468548	0.00252909	0.00157798	0.00164863	0.00191857	1.27176	0.001219	0.00796432	0.40947	-1.28817
1573	4,7,8-trimethoxy-3,5-dimethylchromen-2-one [IIN-based	2.7	level2			265.106	181.6	POS	C14H16O5				Polyketides	Cyclic polyketides		PKKTXAMCHLIVDS-UHFFFAOYSA-N	0.00127078	0.000922307	0.000701598	0.000964896	0.00464837	0.00387425	0.00419999	0.00424087	1.30717	0.000300696	0.00328011	4.39516	2.13591
1574	Dicyclohexylamine	2.7	level2			182.19	177.3	POS	C12H23N	HMDB0251214		C14686	Fatty acids	Fatty esters	Lactones	XBPCUCUWBYBCDP-UHFFFAOYSA-N	0.00477864	0.010306	0.00610006	0.00706158	0.0145244	0.0130157	0.0145835	0.0140412	1.13792	0.0160915	0.0472769	1.9884	0.991605
1575	Napelline	2.7	level2			360.252	166.4	POS	C22H33NO3				Alkaloids	Pseudoalkaloids	Terpenoid alkaloids	AZAZKLKDEOMJBJ-BOPAMEKVSA-N	0.00739834	0.00263886	0.00353479	0.004524	0.00078288	2.74836e-06	2.62293e-06	0.00026275	1.0952	0.0453343	0.102279	0.0580793	-4.10583
1577	(+)-Costunolide	2.7	level2			233.153	151.9	POS	C15H20O2				Terpenoids	Sesquiterpenoids	Germacrane sesquiterpenoids	HRYLQFBHBWLLLL-AHNJNIBGSA-N	0.003624	0.00411756	0.00394092	0.00389416	0.00780806	0.00664776	0.0073212	0.007259	1.31803	0.000778074	0.00594178	1.86407	0.898459
1578	(2R,3R,4S,5R)-2-(6-((E)-4-hydroxy-3-methylbut-2-enylamino)-9H-purin-9-yl)-5-(hydroxymethyl)tetrahydrofuran-3,4-diol	2.7	level2			352.161	134.6	POS	C15H21N5O5	HMDB0304506		C16431	Alkaloids	Pseudoalkaloids	Purine alkaloids	GOSWTRUMMSCNCW-HNNGNKQASA-N	0.0108908	0.00756056	0.00865143	0.00903427	0.0148354	0.0224952	0.015399	0.0175765	1.19279	0.032265	0.0790112	1.94554	0.960172
1581	1,3-Dimethyluracil	2.7	level2			141.065	314.9	POS	C6H8N2O2	HMDB0002144	874-14-6		Alkaloids	Pseudoalkaloids	Purine alkaloids	JSDBKAHWADVXFU-UHFFFAOYSA-N	0.00430556	0.00331713	0.00378651	0.00380307	0.00703297	0.00596608	0.00592277	0.00630727	1.26122	0.00560884	0.0222901	1.65847	0.729853
1582	Valnoctamide	2.7	level2			144.138	237.4	POS	C8H17NO	HMDB0259753	4171-13-5	D02717				QRCJOCOSPZMDJY-UHFFFAOYSA-N	0.078902	0.0480871	0.0565783	0.0611891	0.194179	0.168604	0.15262	0.171801	1.28461	0.00189293	0.0106671	2.8077	1.48939
1583	bis[[4-[(2S,3R,4S,5S,6R)-3,4,5-trihydroxy-6-(hydroxymethyl)tetrahydropyran-2-yl]oxyphenyl]methyl] (2R)-2-[(2S,3R,4S,5S,6R)-6-(acetoxymethyl)-3,4,5-trihydroxy-tetrahydropyran-2-yl]oxy-2-isobutyl-butanedioate	2.7	level2			913.335	145.1	POS	C42H58O23		899430-03-6		Terpenoids			MHVQDAOKYCPBQU-PCBDRJNGSA-N	0.0035479	0.000629722	0.00150621	0.00189461	0.00871345	0.00819702	0.00993287	0.00894778	1.17212	0.00217976	0.0116946	4.72275	2.23963
1587	Irisresorcinol	2.69	level2			347.293	537.2	POS	C23H38O2	HMDB0038532	52483-21-3		Polyketides	Aromatic polyketides	Catechols with side chains	VBBLHZOJAWSCSP-BQYQJAHWSA-N	0.117815	0.117568	0.140058	0.125147	0.00435411	0.0051097	0.00634037	0.00526806	1.33859	0.00367579	0.0166295	0.0420951	-4.5702
1588	Tricycloekasantalol	2.69	level2			181.158	508.8	POS	C12H20O	HMDB0039339	16933-12-3		Terpenoids	Sesquiterpenoids	Santalane sesquiterpenoids	PICWCIWTSQRPHV-UHFFFAOYSA-N	0.00708146	0.00947054	0.00936196	0.00863799	0.0122385	0.0170105	0.0197206	0.0163232	1.17713	0.0296464	0.074186	1.8897	0.918157
1592	FA 18:5+2O	2.69	level2			305.175	372.5	NEG	C18H26O4				Fatty acids	Octadecanoids	Other Octadecanoids	PQPRTPXWQQQKJC-UHFFFAOYSA-N	0.0266366	0.0333054	0.0305549	0.0301656	0.064241	0.0573381	0.0586789	0.060086	1.31229	0.000475165	0.00435487	1.99187	0.994124
1593	Boschniakine	2.69	level2			162.091	319.1	POS	C10H11NO	HMDB0030267	18070-40-1	C09915	Alkaloids	Nicotinic acid alkaloids	Pyridine alkaloids	OPRAONAUWNNOOV-UHFFFAOYSA-N	0.00664762	0.00608671	0.0036661	0.00546681	0.0248813	0.0242936	0.0263196	0.0251648	1.30616	5.61348e-05	0.00128953	4.6032	2.20264
1594	gamma-Thujaplicin	2.69	level2			165.09	280.8	POS	C10H12O2				Terpenoids	Monoterpenoids	Monocyclic monoterpenoids	WKEWHSLZDDZONF-UHFFFAOYSA-N	0.0654874	0.0662495	0.0690819	0.0669396	0.21409	0.217342	0.20089	0.210774	1.34058	9.76081e-06	0.000553563	3.14872	1.65477
1596	5-Hydroxyconiferaldehyde	2.69	level2			195.065	120.5	POS	C10H10O4				Shikimates and Phenylpropanoids	Phenylpropanoids (C6-C3)	Cinnamic acids and derivatives	IEHPLRVWOHZKCS-NSCUHMNNSA-N	0.0172992	0.0163105	0.0146365	0.0160821	0.0298556	0.0305864	0.0292572	0.0298997	1.3256	9.05945e-05	0.00166454	1.8592	0.89468
1597	Ephedroxane	2.69	level2			192.101	102.5	POS	C11H13NO2				Alkaloids			MNYARIILPGRTQL-WPRPVWTQSA-N	0.0193979	0.0177839	0.0178817	0.0183545	0.00961726	0.00907776	0.00621247	0.0083025	1.26834	0.00103733	0.00714591	0.452341	-1.14452
1598	FRIEDELIN	2.69	level2			427.392	622.8	POS	C30H50O				Terpenoids	Triterpenoids	Friedelane triterpenoids	OFMXGFHWLZPCFL-SVRPQWSVSA-N	0.00415241	0.00283528	0.0030256	0.00333777	0.00554431	0.00753554	0.0062903	0.00645672	1.22818	0.0118429	0.0378889	1.93444	0.951918
1600	Dihydrocapsaicin	2.69	level2			306.207	470.2	NEG	C18H29NO3	HMDB0038457	19408-84-5	C16952	Alkaloids	Pseudoalkaloids	Capsaicins and Capsaicinoids	XJQPQKLURWNAAH-UHFFFAOYSA-N	0.0174043	0.0273292	0.0171307	0.0206214	0.0454977	0.0439879	0.0304044	0.0399634	1.15135	0.0298451	0.0745587	1.93795	0.954535
1601	Nandrolone	2.69	level2			275.2	467.5	POS	C18H26O2	HMDB0002725	434-22-0	C07254	Terpenoids	Steroids	Estrane steroids	NPAGDVCDWIYMMC-IZPLOLCNSA-N	0.108838	0.1205	0.113642	0.114327	0.340302	0.474638	0.343094	0.386011	1.31853	0.0250309	0.0654671	3.37639	1.75548
1605	Huperzine B	2.69	level2			279.141	319	POS	C16H20N2O				Alkaloids	Pseudoalkaloids	Terpenoid alkaloids	YYWGABLTRMRUIT-HWWQOWPSSA-N	0.0110456	0.0136563	0.013919	0.0128737	2.72839e-06	2.74836e-06	2.62293e-06	2.69989e-06	1.3423	0.00503921	0.0206857	0.000209722	-12.2192
1606	Specnuezhenide	2.69	level2			687.252	278.9	POS	C31H42O17				Terpenoids	Monoterpenoids	Secoiridoid monoterpenoids	STKUCSFEBXPTAY-XFQLMFQHSA-N	0.0406397	0.0295111	0.0330573	0.0344027	0.0903488	0.0830351	0.0863127	0.0865655	1.31553	0.000181551	0.00246627	2.51624	1.33127
1608	EPICATECHIN_MONOGALLATE	2.69	level2			443.098	250.5	POS	C22H18O10	HMDB0037944	1257-08-5		Shikimates and Phenylpropanoids	Flavonoids	Flavan-3-ols	LSHVYAFMTMFKBA-TZIWHRDSSA-N	0.000903084	0.000367838	0.000526218	0.000599047	0.00368661	0.00254919	0.00272157	0.00298579	1.2719	0.00353943	0.0162058	4.98423	2.31737
1609	(2S,3R,4R,5R,6S)-2-[(2R,3R,4S,5R,6R)-2-[2-(3,4-dihydroxyphenyl)ethoxy]-3,5-dihydroxy-6-(hydroxymethyl)oxan-4-yl]oxy-6-methyloxane-3,4,5-triol	2.69	level2			461.166	250.4	NEG	C20H30O12				Shikimates and Phenylpropanoids	Phenylethanoids (C6-C2)	Phenylethanoids	DORPKYRPJIIARM-GYAWPQPFSA-N	4.80854	4.77346	4.56294	4.71498	1.55363	1.41224	1.47533	1.4804	1.34012	3.11249e-06	0.000335333	0.313979	-1.67126
1610	beta-D-Glucopyranoside,_4-[(1E)-3-hydroxy-1-propen-1-yl]-2-methoxyphenyl	2.69	level2			365.122	244.3	POS	C16H22O8	HMDB0013682	124151-33-3	C00761	Shikimates and Phenylpropanoids	Phenylpropanoids (C6-C3)	Cinnamic acids and derivatives	SFLMUHDGSQZDOW-FAOXUISGSA-N	0.00394089	0.00349734	0.00591474	0.00445099	0.00819586	0.00905247	0.00732442	0.00819092	1.18084	0.013929	0.0426092	1.84025	0.879898
1611	Isosilybin A	2.69	level2			481.112	237.1	NEG	C25H22O10				Shikimates and Phenylpropanoids	Flavonoids	Flavonolignans	FDQAOULAVFHKBX-HKTJVKLFSA-N	0.0550111	0.061501	0.0537765	0.0567629	0.0358898	0.0360707	0.0302263	0.0340622	1.29343	0.00178249	0.0102531	0.60008	-0.736774
1613	aloesin	2.69	level2			393.12	221.8	NEG	C19H22O9	HMDB0248175			Polyketides	Chromanes	Chromones	HKIKAXXIWJHWLY-UHFFFAOYSA-N	0.0461077	0.0474523	0.0456	0.0463866	0.0983764	0.0960034	0.0935592	0.0959797	1.34066	4.94376e-06	0.000407258	2.06912	1.04902
1614	(-)-Podophyllotoxin	2.69	level2			459.128	218.6	NEG	C22H22O8	HMDB0246672			Shikimates and Phenylpropanoids	Lignans	Arylnaphthalene and aryltetralin lignans	YJGVMLPVUAXIQN-UHFFFAOYSA-N	0.0990626	0.0890393	0.0945028	0.0942016	0.0637596	0.0560004	0.0554647	0.0584082	1.30783	0.00081952	0.00615002	0.620035	-0.689579
1616	PHENYLETHANOLAMINE	2.69	level2			120.08	106.5	POS	C8H11NO	HMDB0001065	7568-93-6	C02735	Alkaloids	Tyrosine alkaloids	Phenylethylamines	ULSIYEODSMZIPX-UHFFFAOYSA-N	1.18638	1.10034	1.16955	1.15209	2.11923	2.12942	2.08877	2.11247	1.33858	4.97137e-06	0.000407621	1.8336	0.874681
1617	ACARBOSE	2.69	level2			646.253	46.3	POS	C25H43NO18	HMDB0014429	56180-94-0	C06802	Carbohydrates	Saccharides	Polysaccharides	XUFXOAAUWZOOIT-JMPDRRIHSA-N	0.127106	0.136826	0.120805	0.128246	0.0988985	0.0960856	0.0976767	0.0975536	1.2952	0.00290921	0.0141899	0.760678	-0.394643
1619	(-)-Hydroxycitric acid lactone	2.69	level2			189.004	60.9	NEG	C6H6O7		27750-13-6		Amino acids and Peptides	Small peptides	Aminoacids	PFHZIWAVXDSFTB-CVYQJGLWSA-N	0.0475311	0.0559591	0.0423357	0.0486086	0.14312	0.160445	0.222288	0.175284	1.30402	0.00650951	0.0247594	3.60604	1.85041
1622	L-trans-5-Hydroxy-2-piperidinecarboxylic_acid	2.69	level2			146.081	300.2	POS	C6H11NO3	HMDB0029426	50439-45-7		Amino acids and Peptides	Small peptides	Aminoacids	RKEYKDXXZCICFZ-UHFFFAOYSA-N	0.00498738	0.0049146	0.00373445	0.00454548	0.00700576	0.00587273	0.00672775	0.00653541	1.16	0.0198919	0.0551771	1.43778	0.523847
1627	[(2R,3R,4S)-6-Hydroxy-4-(4-hydroxy-3-methoxyphenyl)-3-(hydroxymethyl)-7-methoxy-1,2,3,4-tetrahydro-2-naphthalenyl]methyl beta-D-glucopyranoside	2.69	level2			545.198	173	POS	C26H34O11				Shikimates and Phenylpropanoids	Lignans	Arylnaphthalene and aryltetralin lignans	BUQQDANPHQFSEK-QBCFYRCNSA-N	0.00754061	0.00809997	0.00789867	0.00784642	0.0229659	0.0214854	0.0223543	0.0222685	1.34032	6.14723e-06	0.000442696	2.83805	1.5049
1628	4-(Butoxymethyl)phenol	2.69	level2			181.122	35.1	POS	C11H16O2	HMDB0039957	57726-27-9					GGPCJIKQXDNJJY-UHFFFAOYSA-N	0.0240013	0.0258853	0.0207148	0.0235338	0.019019	0.0112759	0.0128697	0.0143882	1.11727	0.0309892	0.0766747	0.611384	-0.70985
1632	Protocatechuic aldehyde	2.69	level2			137.024	357	NEG	C7H6O3	HMDB0059965	139-85-5	C16700	Shikimates and Phenylpropanoids	Phenolic acids (C6-C1)	Shikimic acids and derivatives	IBGBGRVKPALMCQ-UHFFFAOYSA-N	0.310068	0.310811	0.325406	0.315428	0.418618	0.430592	0.396349	0.415186	1.31303	0.000880338	0.00644284	1.31626	0.396446
1634	Schisandrin C	2.69	level2			407.152	319.4	POS	C22H24O6				Shikimates and Phenylpropanoids	Lignans	Dibenzocyclooctadienes lignans	HTBWBWWADZJXID-TXEJJXNPSA-N	0.000442782	0.000159915	0.000981717	0.000528138	0.00136653	0.0011759	0.00159139	0.00137794	1.0053	0.0343268	0.082784	2.60905	1.38353
1635	Piperidine	2.69	level2			86.0962	296.1	POS	C5H11N	HMDB0034301	110-89-4	C01746	Alkaloids	Lysine alkaloids	Piperidine alkaloids	NQRYJNQNLNOLGT-UHFFFAOYSA-N	0.281073	0.25632	0.277838	0.271744	0.307186	0.303139	0.30481	0.305045	1.20126	0.0475089	0.105934	1.12255	0.166773
1636	Mulberrin	2.69	level2			445.162	242.1	POS	C25H26O6	HMDB0029507	62949-79-5		Shikimates and Phenylpropanoids	Flavonoids	Flavones	UWQYBLOHTQWSQD-UHFFFAOYSA-N	0.00328176	0.00201477	0.00247634	0.00259096	0.00076237	0.00111658	0.00131547	0.00106481	1.20939	0.019477	0.0543534	0.41097	-1.28289
1637	Aspalathin	2.69	level2			451.124	189.3	NEG	C21H24O11	HMDB0030851			Shikimates and Phenylpropanoids	Flavonoids	Chalcones	VCPUQYKWJRESOC-UHFFFAOYSA-N	0.00411356	0.00441767	0.00429256	0.0042746	0.00554914	0.0050826	0.00504604	0.00522592	1.25949	0.00670673	0.0252751	1.22255	0.289897
1638	Chelidonine	2.69	level2			354.129	149.7	POS	C20H19NO5				Alkaloids	Tyrosine alkaloids	Isoquinoline alkaloids	GHKISGDRQRSCII-ZOCIIQOWSA-N	0.126483	0.129199	0.135904	0.130529	0.00611955	0.00573524	0.00538854	0.00574777	1.34193	0.000471082	0.00433053	0.0440345	-4.50522
1639	skullcapflavone II	2.69	level2			373.092	77.2	NEG	C19H18O8	HMDB0258335		C10183	Shikimates and Phenylpropanoids	Flavonoids	Flavones	GMQFOKBGMKVUQZ-UHFFFAOYSA-N	0.601476	0.545093	0.603176	0.583248	0.904986	0.975396	1.02402	0.968133	1.31806	0.000619667	0.00513912	1.6599	0.731095
1640	Meglumine	2.69	level2			178.107	457.6	POS	C7H17NO5	HMDB0240291	6284-40-8	D01796	Carbohydrates	Aminosugars and aminoglycosides	Aminosugars	MBBZMMPHUWSWHV-BDVNFPICSA-N	0.181078	0.159936	0.180139	0.173718	0.256422	0.227678	0.281128	0.255076	1.25446	0.0085846	0.0300951	1.46834	0.554182
1643	2,6-Dimethylpyridine	2.68	level2			108.08	642	POS	C7H9N	HMDB0032972	108-48-5		Alkaloids	Nicotinic acid alkaloids	Pyridine alkaloids	OISVCGZHLKNMSJ-UHFFFAOYSA-N	0.00858077	0.0095102	0.0086707	0.00892056	0.0116104	0.0123	0.0121903	0.0120335	1.30175	0.0010392	0.00715323	1.34897	0.431855
1644	Trigoforin	2.68	level2			189.09	607.5	POS	C12H12O2	HMDB0029495	14002-93-8		Shikimates and Phenylpropanoids	Coumarins	Simple coumarins	KAFSSZHADPCOBG-UHFFFAOYSA-N	0.0225114	0.0253213	0.0433808	0.0304045	0.00916956	0.00812853	0.00434314	0.00721375	1.23603	0.0258004	0.0669456	0.237259	-2.07546
1646	6'-Hydroxysiphonaxanthin	2.68	level2			617.418	504.1	POS	C40H56O5				Terpenoids	Carotenoids (C40)	Carotenoids (C40, β-ε)	YQJDYMVGIAROMZ-SLYFCCOISA-N	0.00606482	0.00913688	0.0110542	0.00875195	0.00228685	0.00217169	0.00159651	0.00201835	1.29066	0.0410007	0.0946673	0.230617	-2.11643
1651	9-oxo-nonanoic_acid	2.68	level2			173.117	393	POS	C9H16O3	HMDB0094711		C16322	Fatty acids	Fatty Acids and Conjugates	Oxo fatty acids	WLGDDELKYAWBBL-UHFFFAOYSA-N	0.0668514	0.0782613	0.0742672	0.0731267	0.155282	0.133933	0.133813	0.14101	1.31437	0.000998366	0.00697974	1.92829	0.947325
1653	(3S,4S,6R,7S)-1,10-Bisaboladiene-3,4-diol	2.68	level2			239.2	369.3	POS	C15H26O2	HMDB0031383	129673-87-6		Terpenoids	Sesquiterpenoids	Bisabolane sesquiterpenoids	YRFJMOGROZTYPC-UHFFFAOYSA-N	0.00291384	0.00309444	0.00399802	0.00333544	0.00758797	0.00799002	0.00804375	0.00787391	1.30813	0.000240291	0.00286758	2.36068	1.23921
1654	5-Hydroxy-p-mentha-6,8-dien-2-one	2.68	level2			167.106	327	POS	C10H14O2	HMDB0037011	56423-48-4		Terpenoids	Monoterpenoids	Menthane monoterpenoids	IQBZOAYOGMNFPL-UHFFFAOYSA-N	0.0185657	0.014108	0.0166948	0.0164562	0.0682253	0.0667019	0.0745347	0.0698206	1.33342	4.00275e-05	0.00108535	4.24282	2.08503
1656	Toxol	2.68	level2			219.101	241.3	POS	C13H14O3				Terpenoids			KWZYQHQNOWRQRG-OLZOCXBDSA-N	0.174268	0.136185	0.166715	0.159056	0.352513	0.345378	0.349001	0.348964	1.31899	8.7829e-05	0.0016386	2.19397	1.13354
1657	Vasicinol	2.68	level2			205.096	208.4	POS	C11H12N2O2				Alkaloids	Anthranilic acid alkaloids	Quinazoline alkaloids	WEFMOGRHGUPGMA-JTQLQIEISA-N	2.58142	2.46158	2.5775	2.54017	4.7261	4.68936	4.65382	4.68976	1.34073	1.09925e-06	0.000230847	1.84624	0.884592
1658	Calystegin_B2	2.68	level2			176.091	43.8	POS	C7H13NO4	HMDB0038594	127414-85-1	C10851	Alkaloids	Ornithine alkaloids	Tropane alkaloids	FXFBVZOJVHCEDO-UHFFFAOYSA-N	0.262055	0.258077	0.256575	0.258903	0.0773087	0.106539	0.0681717	0.0840064	1.30789	0.00376596	0.0169079	0.324471	-1.62384
1662	Hecogenin	2.68	level2			431.311	516.7	POS	C27H42O4				Terpenoids	Steroids	Spirostane steroids	QOLRLLFJMZLYQJ-LOBDNJQFSA-N	0.0030296	0.0026265	0.00328851	0.00298154	0.00754558	0.00737119	0.00791744	0.00761141	1.32841	5.09032e-05	0.00123039	2.55285	1.35211
1663	N-(2-furylmethyl)-9H-purin-6-amine	2.68	level2			238.071	515.4	POS	C10H9N5O	HMDB0012245	525-79-1	C08272	Alkaloids	Pseudoalkaloids	Purine alkaloids	QANMHLXAZMSUEX-UHFFFAOYSA-N	0.00816046	0.00879525	0.0088415	0.00859907	0.00462674	0.00401847	0.00432279	0.00432267	1.32948	0.000109101	0.00185021	0.50269	-0.992258
1664	delta-Tocotrienol	2.68	level2			397.309	514.9	POS	C27H40O2				Terpenoids	Meroterpenoids	Prenyl quinone meroterpenoids	ODADKLYLWWCHNB-QRCIITMISA-N	0.0352075	0.0330476	0.0425342	0.0369298	0.00233235	0.00169009	0.00260257	0.00220833	1.33479	0.00639392	0.024456	0.0597982	-4.06375
1665	(9Z,12Z)-N-(3-Methoxybenzyl)octadeca-9,12-dienamide	2.68	level2			422.302	474.8	POS	C26H41NO2				Fatty acids	Fatty amides	N-acyl amines	BMQBTHWVNBJSPS-NQLNTKRDSA-N	0.000554965	0.000781426	0.000700548	0.00067898	0.00208618	0.0020778	0.00211517	0.00209305	1.32071	3.01777e-05	0.000940065	3.08264	1.62417
1668	GLYCEROL-MYRISTATE	2.68	level2			325.236	434.8	POS	C17H34O4	HMDB0304951			Fatty acids	Glycerolipids	Monoacylglycerols	DCBSHORRWZKAKO-UHFFFAOYSA-N	0.041116	0.0520398	0.040451	0.0445356	0.260369	0.31287	0.280129	0.284456	1.3347	0.000108669	0.00184543	6.38716	2.67517
1670	6,8-Diprenylnaringenin	2.68	level2			407.184	422.4	NEG	C25H28O5				Shikimates and Phenylpropanoids	Flavonoids	Flavanones	HCNLDGTUMBOHKT-NRFANRHFSA-N	0.0223469	0.0282911	0.0222782	0.0243054	0.053761	0.0711301	0.0637734	0.0628882	1.30464	0.00204929	0.0112456	2.58742	1.37151
1671	(10)-Gingerol	2.68	level2			351.252	417.3	POS	C21H34O4	HMDB0033616	23513-15-7	C17496	Polyketides	Aromatic polyketides	Catechols with side chains	AIULWNKTYPZYAN-UHFFFAOYSA-N	0.00914559	0.0091085	0.00919664	0.00915025	0.0258181	0.0201712	0.022111	0.0227001	1.32615	0.0146022	0.0440531	2.48082	1.31082
1672	Dipropyl phthalate	2.68	level2			249.113	361.6	NEG	C14H18O4				Shikimates and Phenylpropanoids	Phenolic acids (C6-C1)	Shikimic acids and derivatives	MQHNKCZKNAJROC-UHFFFAOYSA-N	0.0236322	0.0242243	0.0253531	0.0244032	0.010294	0.0101986	0.0126103	0.0110343	1.32118	0.000139689	0.00212269	0.452166	-1.14508
1673	(E)-Resveratroloside	2.68	level2			405.119	354.9	NEG	C20H22O9				Shikimates and Phenylpropanoids	Stilbenoids	Monomeric stilbenes	OLCVEOSSVCAFGR-CUYWLFDKSA-N	0.00976518	0.00929711	0.00800902	0.00902377	0.0394525	0.0398563	0.0365236	0.0386108	1.3373	1.47206e-05	0.000663732	4.27879	2.0972
1676	Poncirin	2.68	level2			595.199	233.8	POS	C28H34O14				Shikimates and Phenylpropanoids	Flavonoids	Flavanones	NLAWPKPYBMEWIR-SKYQDXIQSA-N	0.0050942	0.00525266	0.00496646	0.00510444	0.01994	0.0172986	0.0181192	0.0184526	1.33935	0.00311856	0.0148572	3.61501	1.854
1677	[3,4,5-trihydroxy-6-(hydroxymethyl)oxan-2-yl] 9-(hydroxymethyl)-2,2,6a,6b,9,12a-hexamethyl-10-[3,4,5-trihydroxy-6-[(3,4,5-trihydroxy-6-methyloxan-2-yl)oxymethyl]oxan-2-yl]oxy-1,3,4,5,6,6a,7,8,8a,10,11,12,13,14b-tetradecahydropicene-4a-carboxylate	2.68	level2			310.093	222	NEG	C14H17NO7							HVSMXONXCJBJIF-RKQHYHRCSA-N	0.0676415	0.0768733	0.0724505	0.0723218	0.155292	0.162869	0.153514	0.157225	1.33437	2.67685e-05	0.000887134	2.17396	1.12033
1678	Secoxyloganin	2.68	level2			427.119	88.2	POS	C17H24O11				Terpenoids	Monoterpenoids	Secoiridoid monoterpenoids	MQLSOVRLZHTATK-PEYNGXJCSA-N	0.00419526	0.00375909	0.00448403	0.00414613	0.00828006	0.0073479	0.00897918	0.00820238	1.30927	0.00142935	0.00886431	1.97832	0.984278
1679	(R)-5,7-dihydroxy-2-(4-hydroxyphenyl)chroman-4-one	2.68	level2			273.081	66.2	POS	C15H12O5				Shikimates and Phenylpropanoids	Flavonoids	Flavanones	FTVWIRXFELQLPI-CYBMUJFWSA-N	0.0430649	0.0423533	0.0455953	0.0436712	0.106001	0.102615	0.0984116	0.102343	1.33888	1.67658e-05	0.000704455	2.34348	1.22865
1681	Bergenin	2.68	level2			327.072	46.8	NEG	C14H16O9				Shikimates and Phenylpropanoids	Coumarins	Isocoumarins	YWJXCIXBAKGUKZ-HJJNZUOJSA-N	0.0445749	0.0536277	0.0532591	0.0504872	0.142517	0.158032	0.157936	0.152828	1.33121	6.67609e-05	0.00141988	3.02707	1.59792
1683	[(2S)-2-hydroxy-3-[(2R,3R,4S,5R,6R)-3,4,5-trihydroxy-6-[[(2S,3R,4S,5R,6R)-3,4,5-trihydroxy-6-(hydroxymethyl)tetrahydropyran-2-yl]oxymethyl]tetrahydropyran-2-yl]oxy-propyl] (9Z,12Z,15Z)-octadeca-9,12,15-trienoate	2.68	level2			675.359	468.6	NEG	C33H56O14		145937-22-0		Fatty acids	Glycerolipids	Glycosylmonoacylglycerols	MPSGDHOYFIUPSO-MDAKJLGTSA-N	0.0190977	0.019716	0.0222289	0.0203475	0.0116541	0.0156832	0.0123386	0.0132253	1.21819	0.0105343	0.0348199	0.64997	-0.621555
1684	Methylgallate	2.68	level2			183.03	64.7	NEG	C6H13NO3	HMDB0254590	99-24-1		Shikimates and Phenylpropanoids	Phenolic acids (C6-C1)	Simple phenolic acids	FBSFWRHWHYMIOG-UHFFFAOYSA-N	0.114179	0.105331	0.130376	0.116628	0.228353	0.275829	0.318822	0.274335	1.29536	0.00436271	0.0187255	2.35221	1.23402
1688	Genipin	2.68	level2			249.071	431.2	POS	C11H14O5				Terpenoids	Monoterpenoids	Iridoids monoterpenoids	AZKVWQKMDGGDSV-BCMRRPTOSA-N	0.00348476	0.00277846	0.00332599	0.0031964	0.00149518	0.00143821	0.0015166	0.00148333	1.3191	0.0143938	0.043599	0.464062	-1.10761
1689	N-Nitrosomorpholine	2.68	level2			117.066	382.5	POS	C4H8N2O2	HMDB0255208		C19283				ZKXDGKXYMTYWTB-UHFFFAOYSA-N	0.0445886	0.0443124	0.0441146	0.0443385	0.0192218	0.0234881	0.0213619	0.0213573	1.32643	0.0025863	0.0131317	0.481687	-1.05383
1691	Apiin	2.68	level2			563.176	312.7	NEG	C26H28O14				Shikimates and Phenylpropanoids	Flavonoids	Flavones	NTDLXWMIWOECHG-YRCFQSNFSA-N	0.00134233	0.00113785	0.000860295	0.00111349	0.0090949	0.00745816	0.00856224	0.00837177	1.33011	0.00013283	0.0020603	7.51849	2.91044
1692	convolicine	2.68	level2			356.151	295.5	POS	C18H23NO5							HZEOENYXYFFKIU-QDMKHBRRSA-N	0.00184746	0.00195841	0.00269136	0.00216575	0.00529313	0.00440174	0.00479794	0.00483094	1.27958	0.00196019	0.0109149	2.23061	1.15744
1693	(S)-5,7-dihydroxy-8-(3-methylbut-2-en-1-yl)-2-phenylchroman-4-one	2.68	level2			325.139	233.3	POS	C20H20O4				Shikimates and Phenylpropanoids	Flavonoids	Flavanones	DAWSYIQAGQMLFS-SFHVURJKSA-N	0.00842174	0.00860947	0.00903437	0.00868853	0.00174635	0.00171058	0.0020375	0.00183148	1.3387	5.1171e-06	0.000411733	0.210792	-2.24611
1695	Azepino[3,2,1-hi]furo[3,2-e]indole-2,10-dione,_8-ethyldodecahydro-11-methyl-,_(7aR,8R,8aS,11S,11aS,11bR,11cR)-_	2.68	level2			292.19	171.5	POS	C17H25NO3				Alkaloids	Ornithine alkaloids	Stemona alkaloids	HHVLDUXNKYSRDS-BKQRAYJDSA-N	0.0160003	0.0154148	0.0142255	0.0152135	0.00764896	0.00808555	0.00718612	0.00764021	1.32896	0.000202804	0.00262999	0.502199	-0.99367
1696	3-[(3aS,8R,8aR)-8-hydroxy-6,8-dimethyl-3-methylidene-2-oxo-3a,4,5,8a-tetrahydrocyclohepta[b]furan-7-yl]propanoic acid	2.68	level2			279.123	145.4	NEG	C15H20O5				Terpenoids	Sesquiterpenoids	Guaiane sesquiterpenoids	PPUVIGSDWLRHCY-PSOPSSQASA-N	0.6255	0.798219	0.78099	0.734903	0.260509	0.260019	0.224795	0.248441	1.32418	0.000979003	0.00689015	0.338059	-1.56465
1697	Di-n-pentyl_phthalate	2.68	level2			307.19	73.1	POS	C18H26O4	HMDB0251441		C14300	Shikimates and Phenylpropanoids	Phenolic acids (C6-C1)	Simple phenolic acids	IPKKHRVROFYTEK-UHFFFAOYSA-N	0.0220672	0.0308365	0.0244192	0.0257743	0.0839338	0.135315	0.126832	0.11536	1.30384	0.00512895	0.0209497	4.47579	2.16214
1699	Abieta-8(14),9(11),12-triene-7,18-diol	2.68	level2			325.215	34.5	POS	C20H30O2				Terpenoids	Diterpenoids	Abietane diterpenoids	PORHOKHIMOFMMH-UHFFFAOYSA-N	0.00472271	0.00446592	0.00541863	0.00486909	0.0265373	0.0258832	0.0310175	0.0278127	1.33664	0.000150856	0.00221921	5.71209	2.51402
1703	4-Hydroxymethylpyrazole	2.68	level2			99.0551	6.2	POS	C4H6N2O	HMDB0060768	25222-43-9		Alkaloids			JRMKJOOJKCAEJK-UHFFFAOYSA-N	0.00946152	0.0161752	0.0116034	0.0124134	0.0176711	0.0246144	0.0195514	0.0206123	1.09312	0.0459352	0.103286	1.66049	0.731608
1704	Mulberrofuran_T	2.67	level2			717.307	464.9	POS	C44H44O9	HMDB0035940	125882-66-8		Shikimates and Phenylpropanoids	Isoflavonoids	2-arylbenzofurans	XMXZFZDVDCIFKB-UHFFFAOYSA-N	0.00120242	0.000804585	0.000960589	0.000989197	0.000159157	2.74836e-06	2.62293e-06	5.48427e-05	1.14821	0.001815	0.0103772	0.0554416	-4.17289
1706	xi-2,2,6-Trimethyl-1,4-cyclohexanedione	2.67	level2			155.106	422.9	POS	C9H14O2	HMDB0038697			Terpenoids	Apocarotenoids	Apocarotenoids(ε-)	HVHHZSFNAYSPSA-UHFFFAOYSA-N	0.00805401	0.0109289	0.00910027	0.00936107	0.0237552	0.0293639	0.0276845	0.0269345	1.31387	0.000703075	0.00557165	2.87729	1.52471
1707	6-Butyltetrahydro-2H-pyran-2-one	2.67	level2			157.122	400.3	POS	C9H16O2	HMDB0031514	3301-94-8		Fatty acids	Fatty esters	Lactones	PXRBWNLUQYZAAX-UHFFFAOYSA-N	0.00971321	0.0107346	0.0129204	0.0111227	0.0624937	0.0584151	0.0580344	0.0596477	1.33501	9.22471e-06	0.000536831	5.36269	2.42296
1710	Tercatain	2.67	level2			787.1	48.4	POS	C34H26O22	HMDB0039263	103744-87-2		Shikimates and Phenylpropanoids	Phenolic acids (C6-C1)	Gallotannins	NALYUPYCMXELRP-UHFFFAOYSA-N	0.00894862	0.0100355	0.0100876	0.00969056	0.0195638	0.0147681	0.0173015	0.0172111	1.27973	0.00632151	0.0242643	1.77607	0.82869
1712	2,4-dihydroxyheptadec-16-enyl acetate	2.67	level2			351.252	458.1	POS	C19H36O4	HMDB0031043	24607-09-8		Fatty acids	Fatty acyls	Fatty alcohols	NLBYRERHXBTBBR-UHFFFAOYSA-N	0.0364905	0.0567643	0.0392304	0.0441618	0.0725016	0.103058	0.0684372	0.0813324	1.14327	0.0423368	0.0970495	1.84169	0.881033
1715	isorhapontin	2.67	level2			455.112	392	NEG	C21H24O9				Shikimates and Phenylpropanoids	Stilbenoids	Monomeric stilbenes	KLPUXMNQDCUPNO-DXKBKAGUSA-N	0.0171017	0.0208711	0.0124612	0.0168113	0.0471964	0.0300968	0.0387327	0.0386753	1.21408	0.0164952	0.0481356	2.30055	1.20198
1717	Gastrodin	2.67	level2			309.089	361.6	POS	C13H18O7				Shikimates and Phenylpropanoids			PUQSUZTXKPLAPR-UJPOAAIJSA-N	0.00302161	0.00354265	0.00376295	0.0034424	0.0144948	0.0107337	0.0103821	0.0118702	1.31559	0.00321503	0.0151678	3.44823	1.78586
1720	Osajin	2.67	level2			405.168	246.7	POS	C25H24O5				Shikimates and Phenylpropanoids	Isoflavonoids	Isoflavones	DCTLJGWMHPGCOS-UHFFFAOYSA-N	0.00773848	0.0072746	0.00812382	0.0077123	0.00544814	0.00517423	0.00500733	0.0052099	1.31454	0.000832781	0.00621529	0.675531	-0.565905
1721	Kukoamine B	2.67	level2			531.312	228.3	POS	C28H42N4O6	HMDB0060525		C17616	Alkaloids	Ornithine alkaloids	Polyamines	IWRAOCFRRTWUDF-UHFFFAOYSA-N	0.00342542	0.00185737	0.00284285	0.00270855	0.00936847	0.0105623	0.00736311	0.00909796	1.27172	0.00355338	0.0162487	3.35898	1.74802
1722	methyl (4S,5E,6S)-5-ethylidene-4-[2-oxo-2-[(2S,3R,4S,5S,6R)-3,4,5-trihydroxy-6-(hydroxymethyl)oxan-2-yl]oxyethyl]-6-[(2S,3R,4S,5S,6R)-3,4,5-trihydroxy-6-(hydroxymethyl)oxan-2-yl]oxy-4H-pyran-3-carboxylate	2.67	level2			565.177	219.1	NEG	C23H34O16				Terpenoids	Monoterpenoids	Secoiridoid monoterpenoids	QYTFUUGRKFACBM-MHESFOKOSA-N	0.079751	0.0843581	0.0842069	0.082772	0.233313	0.220101	0.222693	0.225369	1.34057	5.00076e-06	0.00040834	2.72277	1.44507
1723	Atractylenolide II	2.67	level2			233.149	72.8	POS	C15H20O2				Terpenoids	Sesquiterpenoids	Eudesmane sesquiterpenoids	OQYBLUDOOFOBPO-KCQAQPDRSA-N	0.0857589	0.126626	0.076565	0.0963167	0.245804	0.299443	0.257837	0.267694	1.28002	0.00156235	0.00939713	2.77931	1.47473
1724	6-Demethoxytangeretin	2.67	level2			365.104	45.8	POS	C19H18O6	HMDB0302157			Shikimates and Phenylpropanoids	Flavonoids	Flavones	DDGJUTBQQURRGE-UHFFFAOYSA-N	1.28871	1.3388	1.34571	1.32441	7.7667	7.61006	7.71953	7.69877	1.34216	2.22567e-08	5.66513e-05	5.81299	2.53928
1725	Cyromazine	2.67	level2			167.105	112	POS	C11H15N5O5	HMDB0029862	66215-27-8	C14147	Alkaloids			LVQDKIWDGQRHTE-UHFFFAOYSA-N	0.004451	0.00360857	0.00437855	0.00414604	0.0232249	0.0241636	0.023	0.0234628	1.33842	1.71156e-06	0.000270743	5.6591	2.50057
1726	(2S)-4-Hydroxy-3-oxo-3,4-dihydro-2H-1,4-benzoxazin-2-yl beta-D-glucopyranoside	2.67	level2			366.08	330.4	POS	C14H17NO9							OUSLYTBGQGKTME-PUOUXSMHSA-N	0.0079659	0.00611702	0.00595335	0.00667876	0.0107989	0.0115679	0.0103527	0.0109065	1.25035	0.00456217	0.0193216	1.63302	0.707541
1727	Feruloyl putrescine (isomer of 1178)	2.67	level2			265.154	297.4	POS	C14H20N2O3				Alkaloids	Ornithine alkaloids	Polyamines	SFUVCMKSYKHYLD-UHFFFAOYSA-N	0.025326	0.0181863	0.0223272	0.0219465	0.00567491	0.00623802	0.007209	0.00637398	1.31753	0.0018217	0.0103985	0.290432	-1.78373
1730	(3S,5S,5a'S,7'S,8'S,8a'R)-5-(3-Furyl)-8'-hydroxy-7'-methyl-3',4,5,5',5a',7',8',8a'-octahydrospiro[furan-3,6'-naphtho[1,8-bc]furan]-2,2'(4'H)-dione	2.67	level2			367.117	156.4	POS	C19H20O6				Terpenoids	Diterpenoids	Colensane and Clerodane diterpenoids	AONLJCCUYGGOSW-PJERILTQSA-N	0.0107272	0.00406055	0.0102237	0.00833716	0.0305401	0.0229119	0.0308293	0.0280938	1.19689	0.00419661	0.0182312	3.3697	1.75262
1733	7-O-Methylbaicalein	2.67	level2			285.069	419.2	POS	C16H12O5				Shikimates and Phenylpropanoids	Flavonoids	Flavones	ZTHLHHDJRXJGRX-UHFFFAOYSA-N	0.00573846	0.00451581	0.00525387	0.00516938	0.00290338	0.00273814	0.0033261	0.0029892	1.27287	0.00532063	0.0214848	0.578252	-0.790231
1734	beta-Alaninebetaine	2.67	level2			132.101	354.3	POS	C6H13NO2	HMDB0304538		C08263				ACZVSMNFVFBOTM-UHFFFAOYSA-N	0.0706097	0.0664564	0.0722279	0.0697646	0.0916528	0.0868457	0.0918938	0.0901307	1.30563	0.00102145	0.00707842	1.29193	0.369523
1736	Portentol	2.67	level2			355.175	134.8	NEG	C17H26O5				Polyketides			CVPVGRDVSAJUQS-UHFFFAOYSA-N	0.0682072	0.0749295	0.0730001	0.0720456	0.257145	0.216906	0.220288	0.231447	1.33511	0.00554893	0.0221183	3.2125	1.6837
1737	Ouabain	2.67	level2			585.293	133.2	POS	C29H44O12	HMDB0015224	630-60-4	C01443	Terpenoids	Steroids	Cardenolides	LPMXVESGRSUGHW-HBYQJFLCSA-N	0.030039	0.0336943	0.0312511	0.0316615	0.0148069	0.0162306	0.0155165	0.015518	1.33347	0.000149843	0.00220941	0.490123	-1.02879
1739	Epimedoside A	2.67	level2			663.231	42.4	POS	C32H38O15				Shikimates and Phenylpropanoids	Flavonoids	Flavonols	OGYXOOJUJQIDOX-FVCAYHPDSA-N	0.015166	0.0105826	0.0133437	0.0130308	0.033371	0.0318786	0.03334	0.0328632	1.31006	0.000152616	0.00223129	2.52197	1.33455
1740	Didox	2.67	level2			150.019	220	NEG	C7H7NO4	HMDB0251226	69839-83-4		Alkaloids	Peptide alkaloids	Simple amide alkaloids	QJMCKEPOKRERLN-UHFFFAOYSA-N	0.0183271	0.0178015	0.0208675	0.0189987	0.0258006	0.0260797	0.0241281	0.0253362	1.25563	0.00489895	0.0202881	1.33357	0.415297
1741	PC(34:5)	2.67	level2			752.519	168.3	POS	C42H74NO8P							LNOISCWEYFRXHZ-IUQGDACHSA-N	0.0102371	0.0137011	0.010691	0.011543	0.00528332	0.00584315	0.00522287	0.00544978	1.29953	0.00527398	0.0213546	0.472127	-1.08275
1742	Squamocin_L	2.66	level2			607.491	605	POS	C37H66O6	HMDB0030940	98767-45-4		Polyketides	Linear polyketides	Acetogenins	URLVCROWVOSNPT-UHFFFAOYSA-N	0.0293454	0.0274675	0.0287025	0.0285051	0.0350388	0.0345359	0.0334949	0.0343565	1.30281	0.00121002	0.00792322	1.20528	0.269365
1743	(1S,2S,3aR,4S,5S,6E,9R,11R,12E,13aS)-4,9,11-Triacetoxy-3a-hydroxy-2,5,8,8,12-pentamethyl-2,3,3a,4,5,8,9,10,11,13a-decahydro-1H-cyclopenta[12]annulen-1-yl benzoate	2.66	level2			607.29	546.6	POS	C33H44O9				Terpenoids	Diterpenoids	Jatrophane diterpenoids	BRVXVMOWTHQKHC-LKCWGRRXSA-N	0.0553165	0.0569605	0.0569013	0.0563927	0.0165361	0.0158472	0.0163187	0.016234	1.34201	2.5273e-07	0.000140576	0.287874	-1.79649
1744	Homoarecoline	2.66	level2			170.117	506.1	POS	C9H15NO2	HMDB0038321	28125-84-0		Alkaloids			UNARQANIGOBIHM-UHFFFAOYSA-N	0.00507622	0.0048596	0.00549812	0.00514465	0.00614748	0.00574033	0.00603052	0.00597278	1.17523	0.0206332	0.0566732	1.16097	0.215331
1747	Panaxacol	2.66	level2			279.195	371.2	POS	C17H26O3	HMDB0039251	106828-96-0					VNLATJUGAZKQEH-UHFFFAOYSA-N	0.0139451	0.0134885	0.0144798	0.0139711	0.00971817	0.0108663	0.0106322	0.0104056	1.29678	0.00140221	0.00874933	0.74479	-0.425094
1749	Delcorine	2.66	level2			480.295	358.2	POS	C26H41NO7				Alkaloids	Pseudoalkaloids	Terpenoid alkaloids	XTLROSDJDZHIIK-FQCWPTJPSA-N	0.0782074	0.0860623	0.0789323	0.0810673	0.104274	0.107122	0.0980921	0.103163	1.27295	0.00379069	0.0169859	1.27256	0.347731
1751	Citbismine_F	2.66	level2			655.227	306.9	POS	C36H34N2O10	HMDB0034473			Alkaloids	Anthranilic acid alkaloids	Acridone alkaloids	RHEWDZDNLMBJJF-UHFFFAOYSA-N	0.010327	0.0102231	0.00779452	0.00944823	0.0314984	0.0272132	0.0293842	0.0293653	1.32238	0.000180291	0.00245672	3.10802	1.63599
1752	Gniditrin	2.66	level2			647.286	257.8	POS	C37H42O10				Terpenoids	Diterpenoids	Daphnane diterpenoids	NEIGQRKMHFDLTK-FLWUMMFCSA-N	0.00188531	0.00166572	0.00172804	0.00175969	0.0191123	0.0139931	0.014493	0.0158661	1.33672	0.0129749	0.0404746	9.0164	3.17255
1755	(+)-bicuculline	2.66	level2			390.101	448.1	POS	C20H17NO6				Alkaloids	Tyrosine alkaloids	Isoquinoline alkaloids	IYGYMKDQCDOMRE-ZWKOTPCHSA-N	0.0307048	0.0512864	0.0333049	0.038432	0.409125	0.614346	0.421598	0.48169	1.32432	0.0208958	0.0572011	12.5336	3.64772
1758	CATECHIN_PENTAACETATE	2.66	level2			501.14	257.8	POS	C25H24O11				Shikimates and Phenylpropanoids	Flavonoids	Flavan-3-ols	BKYWAYNSDFXIPL-JWQCQUIFSA-N	0.0107887	0.0125973	0.0122437	0.0118766	0.00990884	0.0102112	0.00877883	0.00963294	1.13594	0.0333781	0.0810352	0.811089	-0.302067
1759	Breviscapine	2.66	level2			485.073	244.3	POS	C21H18O12				Shikimates and Phenylpropanoids	Flavonoids	Flavones	DJSISFGPUUYILV-ZFORQUDYSA-N	0.00756844	0.00799027	0.00849169	0.0080168	0.0181115	0.0159528	0.0161267	0.0167303	1.32885	0.000300869	0.00328102	2.08691	1.06137
1760	Acetylcimigenol arabinoside	2.66	level2			685.386	229.8	POS	C37H58O10				Terpenoids	Triterpenoids	Cycloartane triterpenoids	IHEJMZHKJYHVFF-NETQQFODSA-N	0.000242092	0.000390194	0.000542552	0.000391612	0.00181252	0.00181426	0.00160631	0.00174436	1.2816	0.000258861	0.00299852	4.45431	2.1552
1761	2-[(2S,3S,4S)-3-[(1S)-1-acetyloxyethyl]-5-methoxycarbonyl-2-[(2S,3R,4S,5S,6R)-3,4,5-trihydroxy-6-(hydroxymethyl)oxan-2-yl]oxy-3,4-dihydro-2H-pyran-4-yl]acetic acid	2.66	level2			463.145	118.7	NEG	C19H28O13				Terpenoids	Monoterpenoids	Secoiridoid monoterpenoids	OPKOYMHTMXJHRG-GUDQPSSMSA-N	0.0125574	0.00960136	0.0110485	0.0110691	0.0130051	0.0138671	0.0142322	0.0137014	1.0761	0.0469854	0.105075	1.23781	0.307793
1763	6'',6''-Dimethyl-3',4'-methylenedioxypyrano[2'',3'':7,8]flavone	2.66	level2			349.108	43.8	POS	C21H16O5				Shikimates and Phenylpropanoids	Flavonoids	Flavones	VTEDSEHLMNTMAV-UHFFFAOYSA-N	0.0547089	0.0454556	0.0512244	0.0504629	0.0263851	0.0229665	0.0227776	0.0240431	1.31661	0.000850828	0.0063029	0.47645	-1.0696
1767	Timosaponin B III	2.66	level2			903.492	341	POS	C45H74O18		139051-27-7		Terpenoids	Steroids	Furostane steroids	ROHLIYKWVMBBFX-GFMVILKCSA-N	0.00591002	0.00597958	0.00608586	0.00599182	0.000496542	2.74836e-06	0.000255298	0.000251529	1.08013	2.89386e-06	0.000326837	0.0419788	-4.5742
1769	N-Methyl-1-deoxynojirimycin	2.66	level2			178.107	482.6	POS	C7H15NO4	HMDB0035360	69567-10-8		Alkaloids			AAKDPDFZMNYDLR-UHFFFAOYSA-N	0.0315707	0.0384105	0.0344252	0.0348021	0.0470522	0.0454479	0.0433844	0.0452949	1.21732	0.00955999	0.0324817	1.3015	0.380172
1771	Dehydroaporheine	2.66	level2			278.116	317.3	POS	C18H15NO2	HMDB0033355	36285-03-7		Alkaloids	Tyrosine alkaloids	Aporphine alkaloids	YUWBTKIVDAWQHK-UHFFFAOYSA-N	0.00212622	0.00141351	0.00168077	0.00174017	0.00614839	0.00678476	0.00608542	0.00633953	1.31989	0.000112883	0.00188264	3.64306	1.86515
1775	Flindersiachromone	2.66	level2			251.105	274.2	POS	C17H14O2				Polyketides	Chromanes	Chromones	VNZNWFQJBFLELF-UHFFFAOYSA-N	0.00378661	0.00313613	0.00462831	0.00385035	0.0145552	0.00921294	0.0106364	0.0114682	1.27795	0.0100015	0.0335333	2.97848	1.57458
1776	2,4,6-Trimethoxyphenyl_acetate	2.66	level2			227.091	171.7	POS	C11H14O5	HMDB0041560	30225-90-2		Polyketides	Phloroglucinols	Acyl phloroglucinols	LQLIWGLJAHTMMY-UHFFFAOYSA-N	0.00226312	0.00228397	0.00188065	0.00214258	0.024226	0.0231609	0.0266478	0.0246783	1.34001	0.00181617	0.0103817	11.518	3.52582
1777	6-Hydroxysumatrol	2.66	level2			425.124	328	NEG	C23H22O8				Shikimates and Phenylpropanoids	Isoflavonoids	Isoflavanones	RMAYNNFCPNGTQW-UHFFFAOYSA-N	0.00527671	0.00411049	0.00381562	0.00440094	0.0119501	0.0117197	0.0128357	0.0121685	1.31776	0.000157702	0.00227564	2.76498	1.46727
1782	Curcumin	2.66	level2			367.118	113.5	NEG	C21H20O6				Shikimates and Phenylpropanoids	Diarylheptanoids	Linear diarylheptanoids	ZIUSSTSXXLLKKK-KOBPDPAPSA-N	0.0149272	0.0232322	0.0215566	0.0199053	0.127369	0.0940581	0.118468	0.113298	1.31874	0.000812411	0.00611451	5.69186	2.5089
1785	2-[(2-hydroxy-3-methyl-butanoyl)amino]-4-methyl-pentanoic acid	2.66	level2			232.154	256.5	POS	C11H21NO4		70134-19-9		Amino acids and Peptides	Small peptides	Dipeptides	SWEPQJJUAVEABL-UHFFFAOYSA-N	0.00202613	0.00195344	0.00222474	0.0020681	0.00333653	0.00266568	0.00353442	0.00317887	1.22715	0.0156334	0.0463105	1.5371	0.620208
1787	methyl (2S)-5-oxopyrrolidine-2-carboxylate	2.66	level2			144.065	88.8	POS	C6H9NO3		4931-66-2		Amino acids and Peptides	Small peptides	Aminoacids	HQGPKMSGXAUKHT-BYPYZUCNSA-N	0.0144681	0.0139651	0.014346	0.0142598	0.0179412	0.0186386	0.0192463	0.0186087	1.32291	0.000431771	0.00408762	1.30498	0.384029
1789	Montanol	2.65	level2			353.268	510.1	POS	C21H36O4				Polyketides	Linear polyketides	Open-chain polyketides	CFWFJIRDZVFKJB-GRZKGYEASA-N	0.0260461	0.0273113	0.0270884	0.0268153	0.0153199	0.0120409	0.0135209	0.0136272	1.31373	0.000210499	0.00268412	0.508189	-0.976564
1792	Putative_Alantolactone	2.65	level2			233.153	293.1	POS	C15H20O2	HMDB0035906	546-43-0	C09289	Terpenoids	Sesquiterpenoids	Eudesmane sesquiterpenoids	PXOYOCNNSUAQNS-UHFFFAOYSA-N	0.0199897	0.0194238	0.0162776	0.0185637	0.0327276	0.0316954	0.0318304	0.0320845	1.3074	0.000352623	0.00360056	1.72835	0.789393
1793	Hasubanonine	2.65	level2			374.198	289.1	POS	C21H27NO5				Alkaloids	Tyrosine alkaloids	Hasubanan alkaloids	DXUSNRCTWFHYFS-LEWJYISDSA-N	0.0361522	0.0245812	0.033005	0.0312461	0.0845056	0.0842074	0.0849998	0.084571	1.30891	0.0040346	0.0177229	2.7066	1.43648
1794	Acrimarine_J	2.65	level2			596.226	244.6	POS	C35H33NO8	HMDB0040386	147395-90-2		Alkaloids	Anthranilic acid alkaloids	Acridone alkaloids	ZWXOIPZATSFFPY-UHFFFAOYSA-N	0.0315386	0.0339158	0.0309507	0.032135	0.0218774	0.0212924	0.0221874	0.0217857	1.32641	0.000392655	0.00385157	0.677943	-0.560764
1796	MADECASSIC ACID	2.65	level2			503.337	557.3	NEG	C30H48O6				Terpenoids	Triterpenoids	Ursane and Taraxastane triterpenoids	PRAUVHZJPXOEIF-AOLYGAPISA-N	0.0217896	0.0240518	0.0284532	0.0247649	0.0401636	0.0396809	0.0388945	0.0395796	1.27338	0.00174233	0.0101002	1.59822	0.676464
1798	7-methyl-3-methylidene-6-(3-oxobutyl)-4,7,8,8a-tetrahydro-3aH-cyclohepta[b]furan-2-one	2.65	level2			247.133	387.3	NEG	C15H20O3	HMDB0256134			Terpenoids	Sesquiterpenoids	Germacrane sesquiterpenoids	AVFIYMSJDDGDBQ-UHFFFAOYSA-N	0.0103728	0.0167224	0.0142469	0.0137807	0.0218548	0.0259221	0.023166	0.0236476	1.18059	0.0109896	0.0359077	1.716	0.779046
1799	Liquiritin	2.65	level2			417.119	302.7	NEG	C21H22O9	HMDB0029520	551-15-5		Shikimates and Phenylpropanoids	Flavonoids	Flavanones	DEMKZLAVQYISIA-UHFFFAOYSA-N	0.0161247	0.0209655	0.0209357	0.019342	0.0692159	0.0694109	0.0678051	0.0688106	1.32919	8.03965e-06	0.000502238	3.55758	1.8309
1801	3,5,6,7,8,3',4'-Heptamethoxyflavone	2.65	level2			455.135	272.4	POS	C22H24O9	HMDB0037689	1178-24-1		Shikimates and Phenylpropanoids	Flavonoids	Flavonols	SSXJHQZOHUYEGD-UHFFFAOYSA-N	0.00169781	0.00170437	0.0018279	0.00174336	0.00277198	0.00301717	0.00315764	0.00298226	1.32325	0.000502652	0.0045186	1.71064	0.774534
1802	euphodendroidin E	2.65	level2			707.308	253.9	POS	C37H48O12				Terpenoids	Diterpenoids	Jatrophane diterpenoids	KYOXKUIYXAIFBB-AESUKSELSA-N	0.00308397	0.00299218	0.00290284	0.002993	0.0473361	0.0415223	0.0481512	0.0456699	1.34166	0.00237049	0.012381	15.2589	3.93158
1803	methyl (1S,4aS,7aS)-7-(hydroxymethyl)-1-[(2S,3R,4S,5S,6R)-3,4,5-trihydroxy-6-[[(2R,3R,4S,5S,6R)-3,4,5-trihydroxy-6-[[(E)-3-(4-hydroxyphenyl)prop-2-enoyl]oxymethyl]oxan-2-yl]oxymethyl]oxan-2-yl]oxy-1,4a,5,7a-tetrahydrocyclopenta[c]pyran-4-carboxylate	2.65	level2			695.214	217.4	NEG	C32H40O17				Terpenoids	Monoterpenoids	Iridoids monoterpenoids	QIWWLKDHHMGRQL-QJIBEZHESA-N	0.0015095	0.00055918	0.00121388	0.00109418	0.00187789	0.00306893	0.00267143	0.00253942	1.07952	0.0322716	0.0790201	2.32083	1.21464
1804	geniposidic acid	2.65	level2			373.113	123.3	NEG	C16H22O10				Terpenoids	Monoterpenoids	Iridoids monoterpenoids	ZJDOESGVOWAULF-OGJQONSISA-N	0.0465828	0.0489137	0.0455038	0.0470001	0.0332793	0.0343731	0.0343801	0.0340108	1.32836	0.000264852	0.00303871	0.723634	-0.466669
1805	roemerine	2.65	level2			280.128	122.3	POS	C18H17NO2				Alkaloids	Tyrosine alkaloids	Aporphine alkaloids	JCTYWRARKVGOBK-CQSZACIVSA-N	0.0516893	0.0451186	0.0461988	0.0476689	0.124073	0.123918	0.126116	0.124703	1.33775	3.64881e-06	0.000354218	2.61602	1.38737
1810	Gypsogenin	2.65	level2			469.329	274.4	NEG	C27H45NO3				Terpenoids	Triterpenoids	Oleanane triterpenoids	QMHCWDVPABYZMC-MYPRUECHSA-N	0.0139738	0.0176321	0.0164125	0.0160061	0.0212219	0.0216091	0.0182193	0.0203501	1.08514	0.0458469	0.103143	1.2714	0.346412
1811	Enicoflavine	2.65	level2			212.091	411.8	POS	C10H13NO4							GBJQPSBGSKNYHV-YVMONPNESA-N	0.0103412	0.0100112	0.0100634	0.0101386	0.00749941	0.00698359	0.00758534	0.00735611	1.32211	0.000201905	0.00262177	0.725552	-0.462849
1812	Eriosemaone_C	2.65	level2			531.204	276.2	POS	C31H30O8				Shikimates and Phenylpropanoids	Flavonoids	Flavanones	XFFLLCTVQRLAND-VWLOTQADSA-N	0.0035555	0.00223867	0.00310078	0.00296498	0.0093477	0.00746095	0.00852316	0.00844393	1.29187	0.00120968	0.00792215	2.84789	1.50989
1813	Murrayazolinol	2.65	level2			348.194	211.2	POS	C23H25NO2	HMDB0038827	125287-09-4		Alkaloids	Tryptophan alkaloids	Carbazole alkaloids	SIYXICWJEWHFMI-UHFFFAOYSA-N	0.00451104	0.00413608	0.00449944	0.00438219	0.0106612	0.00931931	0.0110717	0.0103507	1.33013	0.000390069	0.00383742	2.362	1.24001
1814	Piperlotine A	2.65	level2			232.129	439.6	POS	C14H17NO2				Alkaloids	Lysine alkaloids	Piperidine alkaloids	JYEDISZKFNNREA-RMKNXTFCSA-N	0.0103671	0.00926805	0.0102009	0.00994534	0.0138393	0.0126595	0.0144518	0.0136502	1.27559	0.00411605	0.0179782	1.37252	0.45683
1815	METHYL GALACTOSIDE	2.65	level2			193.071	391.1	NEG	C7H14O6	HMDB0246173			Carbohydrates	Saccharides	Disaccharides	HOVAGTYPODGVJG-UHFFFAOYSA-N	0.043507	0.0409089	0.0460919	0.0435026	0.0716478	0.0753047	0.0682018	0.0717181	1.3213	0.000372767	0.00372796	1.64859	0.721237
1816	Alloimperatorin	2.65	level2			271.092	383.8	POS	C16H14O4	HMDB0301848		C09053	Shikimates and Phenylpropanoids	Coumarins	Simple coumarins	KDXVVZMYSLWJMA-UHFFFAOYSA-N	0.0257708	0.0275111	0.0263208	0.0265342	0.0143969	0.0156199	0.0137521	0.0145896	1.32997	9.12634e-05	0.00167103	0.549841	-0.862913
1817	5,7-dihydroxy-2-(4-hydroxy-3-methoxyphenyl)-3,6-dimethoxychromen-4-one [IIN-based on	2.65	level2			383.076	364.3	POS	C18H16O8	HMDB0033819	10173-01-0		Shikimates and Phenylpropanoids	Flavonoids	Flavonols	XUWTZJRCCPNNJR-UHFFFAOYSA-N	0.0117958	0.0092479	0.0112316	0.0107584	0.00101256	0.00130951	0.000825648	0.00104924	1.33107	0.000246042	0.00290921	0.0975271	-3.35805
1818	Cornuside	2.65	level2			543.167	285.5	POS	C24H30O14				Terpenoids	Monoterpenoids	Secoiridoid monoterpenoids	SMTKSCGLXONVGL-UPIRYGIPSA-N	0.00381201	0.00217937	0.00232263	0.00277134	2.72839e-06	2.74836e-06	2.62293e-06	2.69989e-06	1.34037	0.0337548	0.0817356	0.00097422	-10.0035
1820	Methyl 2-{[6-O-(beta-D-xylopyranosyl)-beta-D-glucopyranosyl]oxy}benzoate	2.65	level2			464.175	216.2	POS	C19H26O12	HMDB0303042						VHUNCYDAXJGCLO-AHMNSWSSSA-N	0.0221028	0.0185963	0.0151989	0.0186327	0.00472858	0.00171032	0.00340538	0.00328143	1.26461	0.00212919	0.0115264	0.176111	-2.50544
1823	Gibberellin_A86	2.64	level2			381.154	378.3	POS	C19H24O8				Terpenoids	Diterpenoids	Gibberellins	JMGSTZUVIHCAAA-UHFFFAOYSA-N	0.000662575	0.00119275	0.000365739	0.000740356	0.00322582	0.00682684	0.00352233	0.004525	1.22552	0.0326024	0.07965	6.11192	2.61162
1824	FA 18:4+1O	2.64	level2			293.21	376.2	POS	C18H28O3				Fatty acids	Octadecanoids	12-oxophytodienoic acid metabolites	PMTMAFAPLCGXGK-UHFFFAOYSA-N	0.435503	0.489985	0.449005	0.458165	0.983175	1.08827	0.926714	0.999385	1.32683	0.000416161	0.00399042	2.18128	1.12518
1825	(S)-Autumnaline	2.64	level2			374.199	237.9	POS	C21H27NO5				Alkaloids	Tyrosine alkaloids	Isoquinoline alkaloids	GZUNPCNPOLOTLX-INIZCTEOSA-N	0.0324756	0.0288458	0.0304932	0.0306049	0.291626	0.284634	0.176613	0.250958	1.3257	0.0272946	0.069776	8.19993	3.03561
1826	Sophoracoumestan_A	2.64	level2			335.094	45.9	POS	C20H14O5				Shikimates and Phenylpropanoids	Isoflavonoids	Coumestan	JOMJKDWBAPDZIF-UHFFFAOYSA-N	0.117083	0.119924	0.110223	0.115743	0.243576	0.238167	0.257271	0.246338	1.33714	3.34855e-05	0.000994917	2.12831	1.08971
1828	Cycloart-25-ene-3,24-diol	2.64	level2			425.377	581	POS	C30H50O2				Terpenoids	Triterpenoids	Cycloartane triterpenoids	MHGLNDDJLDJDBG-UHFFFAOYSA-N	0.0639006	0.0520429	0.0621157	0.0593531	0.019641	0.0183863	0.0179988	0.0186754	1.33229	0.00730308	0.0268325	0.314649	-1.66818
1829	(7E)-11,12,13-Trihydroxy-3-isobutyl-4,5,8-trimethyl-3,3a,4,6a,9,10,11,12,13,14-decahydro-1H-cycloundeca[d]isoindole-1,15(2H)-dione	2.64	level2			442.258	400.4	POS	C24H37NO5				Alkaloids	Pseudoalkaloids	Cytochalasan alkaloids	PLGNVFSTPJUFKJ-UHFFFAOYSA-N	0.00190507	0.00278506	0.00266401	0.00245138	0.00433207	0.00363446	0.00355047	0.003839	1.15407	0.0200129	0.0554195	1.56606	0.647138
1832	Laudanosine	2.64	level2			358.204	305.8	POS	C21H27NO4	HMDB0030213	2688-77-9		Alkaloids	Tyrosine alkaloids	Isoquinoline alkaloids	KGPAYJZAMGEDIQ-UHFFFAOYSA-N	0.0383049	0.0365447	0.0356881	0.0368459	0.131317	0.133638	0.130186	0.131714	1.34176	1.95546e-07	0.000121174	3.57471	1.83783
1833	harpagoside	2.64	level2			517.171	302.5	POS	C24H30O11				Terpenoids	Monoterpenoids	Iridoids monoterpenoids	KVRQGMOSZKPBNS-FMHLWDFHSA-N	0.00212416	0.00174463	0.00179237	0.00188705	0.0038874	0.00517102	0.00390141	0.00431994	1.29484	0.00531217	0.021459	2.28925	1.19488
1834	Tetrahydropalmatin	2.64	level2			356.188	278.9	POS	C21H25NO4				Alkaloids	Tyrosine alkaloids	Isoquinoline alkaloids	AEQDJSLRWYMAQI-QGZVFWFLSA-N	0.0242195	0.0242559	0.0258353	0.0247702	0.1833	0.18591	0.182948	0.184052	1.34203	1.24575e-08	5.28623e-05	7.43038	2.89344
1835	Licoflavone B	2.64	level2			413.173	259.5	POS	C25H26O4				Shikimates and Phenylpropanoids	Flavonoids	Flavones	GLDVIKFETPAZNV-UHFFFAOYSA-N	0.0192693	0.0166314	0.0179577	0.0179528	0.0304302	0.0289421	0.0408609	0.0334111	1.25614	0.015602	0.0462416	1.86105	0.896117
1838	Physagulin_E	2.64	level2			707.327	245	POS	C36H50O14	HMDB0039693	148054-13-1		Terpenoids	Steroids	Ergostane steroids	FOBLFFYOXRPILL-UHFFFAOYSA-N	0.00172594	0.0014588	0.000836042	0.00134026	0.00555455	0.00724879	0.00551702	0.00610679	1.28476	0.00162627	0.00965434	4.55642	2.1879
1841	Galangin	2.64	level2			269.038	234.5	NEG	C15H10O5	HMDB0029521	548-83-4	C10044	Shikimates and Phenylpropanoids	Flavonoids	Flavonols	VCCRNZQBSJXYJD-UHFFFAOYSA-N	0.0373928	0.0405172	0.0373436	0.0384178	0.0675365	0.0672592	0.0660837	0.0669598	1.33551	1.51241e-05	0.000671626	1.74294	0.801519
1842	(2R)-3-(3,4-dihydroxyphenyl)-1-[2,4-dihydroxy-3-[(2S,3R,4R,5S,6R)-3,4,5-trihydroxy-6-(hydroxymethyl)oxan-2-yl]phenyl]-2-hydroxypropan-1-one	2.64	level2			451.124	232.5	NEG	C21H24O11				Shikimates and Phenylpropanoids	Flavonoids	Chalcones	LNVWGAALAQOWHF-IUOSPEFCSA-N	0.0485851	0.0542831	0.0516636	0.0515106	0.272257	0.274804	0.259666	0.268909	1.34091	1.6211e-06	0.000265953	5.22045	2.38417
1845	Benzoic acid + 2O, O-Hex	2.64	level2			315.072	88	NEG	C13H16O9				Shikimates and Phenylpropanoids	Phenolic acids (C6-C1)	Simple phenolic acids	CBTFERBMQQAROP-UHFFFAOYSA-N	0.403141	0.401451	0.413236	0.405942	0.584147	0.59635	0.561029	0.580509	1.33385	9.18678e-05	0.00167788	1.43003	0.516043
1846	Haplodimerine	2.64	level2			487.189	406.5	POS	C28H26N2O6				Alkaloids	Tryptophan alkaloids	Quinoline alkaloids	ZTSCGHFGGQONGE-XHFAZCCNSA-N	0.00369958	0.00455948	0.00407178	0.00411028	0.00265677	0.00268464	0.00301253	0.00278465	1.25854	0.008404	0.0296552	0.677484	-0.561742
1848	Gnididin	2.64	level2			649.299	247.5	POS	C37H44O10				Terpenoids	Diterpenoids	Daphnane diterpenoids	OBYWPUMYSJSSFH-YCCBJEBWSA-N	0.0127657	0.0121173	0.0129919	0.012625	0.0254374	0.0224407	0.0273232	0.0250671	1.32176	0.00100128	0.00699192	1.98551	0.989512
1849	Acetylbrowniine	2.64	level2			510.305	176.3	POS	C27H43NO8				Alkaloids	Pseudoalkaloids	Terpenoid alkaloids	BQMFTYVYHRJVMQ-VEUWJJFUSA-N	0.00325392	0.00290232	0.00309283	0.00308303	0.00187687	0.00216367	0.0011625	0.00173435	1.13654	0.0127678	0.0400107	0.562547	-0.829955
1850	Strophanthidin	2.64	level2			427.207	437	POS	C23H32O6				Terpenoids	Steroids	Cardenolides	ODJLBQGVINUMMR-HZXDTFASSA-N	0.0178021	0.0168081	0.0173001	0.0173034	0.00174285	0.00292978	0.00300436	0.002559	1.32075	7.83227e-06	0.000494985	0.14789	-2.75741
1853	2-O-Acetyl-20-hydroxyecdysone	2.64	level2			545.314	278.8	POS	C29H46O8				Terpenoids	Steroids	Ecdysteroids	TXLUXHSVMYTTCI-FORVDKSSSA-N	0.00245911	0.00237919	0.00255481	0.00246437	0.0250505	0.0212381	0.0245713	0.02362	1.3409	0.00315147	0.0149661	9.58459	3.26072
1854	Syringaresnol-4-O-beta-D-apiofuranosy	2.64	level2			735.245	278.2	POS	C33H44O17				Shikimates and Phenylpropanoids	Lignans	Furofuranoid lignans	BUBVKRMIMSPLND-XSTKEGOHSA-N	0.014465	0.0122262	0.013266	0.0133191	0.0509295	0.0523642	0.0544016	0.0525651	1.33888	5.16232e-06	0.000413491	3.9466	1.98061
1855	schisandrin B	2.64	level2			423.179	242.7	POS	C23H28O6	HMDB0257360			Shikimates and Phenylpropanoids	Lignans	Dibenzocyclooctadienes lignans	RTZKSTLPRTWFEV-UHFFFAOYSA-N	0.0178466	0.0150306	0.0163188	0.0163987	0.0060095	0.00653509	0.00630275	0.00628245	1.33323	0.000257638	0.00298964	0.383107	-1.38418
1856	6,7-Dihydroxycoumarin	2.64	level2			201.131	240.7	POS	C9H6O4	HMDB0030819	305-01-1	C09263	Shikimates and Phenylpropanoids	Coumarins	Simple coumarins	ILEDWLMCKZNDJK-UHFFFAOYSA-N	0.00126837	0.0011725	0.00119427	0.00121171	0.000586453	0.000604707	0.000900814	0.000697325	1.205	0.00830434	0.0294036	0.575486	-0.797146
1857	3-(3,4-dihydroxyphenyl)-5,7-dihydroxy-6,8-bis(3-methylbut-2-enyl)chromen-4-one	2.64	level2			421.163	136.5	NEG	C25H26O6				Shikimates and Phenylpropanoids	Isoflavonoids	Isoflavones	OAUIRSVJXOFAOO-UHFFFAOYSA-N	0.62098	0.77434	0.72696	0.707426	0.558188	0.576587	0.535436	0.556737	1.16117	0.0324367	0.0793326	0.786989	-0.345584
1858	N-Methylanthranilic Acid	2.64	level2			152.07	100	POS	C8H9NO2	HMDB0032609	119-68-6	C03005	Alkaloids	Anthranilic acid alkaloids	Anthranillic acid derivatives	WVMBPWMAQDVZCM-UHFFFAOYSA-N	0.0207177	0.029141	0.0255331	0.0251306	0.0498493	0.0414815	0.0471279	0.0461529	1.25858	0.00373862	0.0168215	1.83652	0.876975
1859	(1S,3R,4R,5R)-3-[(E)-3-[2-(3,4-dihydroxyphenyl)-7-hydroxy-3-methoxycarbonyl-2,3-dihydro-1-benzofuran-5-yl]prop-2-enoyl]oxy-1,4,5-trihydroxycyclohexane-1-carboxylic acid	2.64	level2			527.117	356.5	NEG	C26H26O13				Shikimates and Phenylpropanoids	Phenylpropanoids (C6-C3)	Cinnamic acids and derivatives	KHMIUDZAXHOTTP-IZEITFQPSA-N	0.00240094	0.00198099	0.00210177	0.00216123	0.00593974	0.00554941	0.00664523	0.00604479	1.32817	0.000351237	0.00359295	2.79692	1.48384
1860	Xanyhyletin	2.64	level2			211.074	237.4	POS	C14H12O3		553-19-5	C09317	Shikimates and Phenylpropanoids	Coumarins	Simple coumarins	QOTBQNVNUBKJMS-UHFFFAOYSA-N	0.0666075	0.0667426	0.0690162	0.0674554	1.16272	1.16764	1.11692	1.1491	1.34228	0.000216034	0.00272691	17.0349	4.09042
1863	(25S)-26-Hydroxy-24-methylenecycloartan-3-one	2.63	level2			455.388	570.4	POS	C31H50O2	HMDB0034555	232266-06-7		Terpenoids	Triterpenoids	Cycloartane triterpenoids	OKILVWSNJYSCMZ-UHFFFAOYSA-N	0.00989317	0.00891159	0.00999007	0.00959828	0.0134518	0.0129642	0.0137765	0.0133975	1.30524	0.000809551	0.00610041	1.39582	0.481115
1864	8-Acetoxy-4-acoren-3-one	2.63	level2			279.195	454.1	POS	C17H26O3	HMDB0030974	185154-95-4		Terpenoids	Sesquiterpenoids	Acorane sesquiterpenoids	LDEHIZSFHFOEKN-UHFFFAOYSA-N	0.0101272	0.0155973	0.0112329	0.0123191	0.032724	0.0445791	0.0240436	0.0337823	1.22562	0.0255333	0.0664378	2.74226	1.45536
1865	6-Paradol	2.63	level2			261.184	398.4	POS	C17H26O3	HMDB0030801	27113-22-0	C10482	Polyketides	Aromatic polyketides	Catechols with side chains	CZNLTCTYLMYLHL-UHFFFAOYSA-N	0.0846941	0.0883875	0.103284	0.092122	0.0146764	0.0157123	0.0109862	0.0137916	1.33126	0.000181167	0.00246322	0.149711	-2.73975
1866	Furostane base -2H + 1O, O-Hex, O-Hex-dHex	2.63	level2			901.475	357.4	POS	C45H74O19				Terpenoids	Steroids	Furostane steroids	MYVJSVSGFJDUAQ-UHFFFAOYSA-N	0.00538879	0.00780485	0.00791695	0.00703686	0.00345727	0.00241729	0.00435349	0.00340935	1.16428	0.0219616	0.0593477	0.484499	-1.04544
1867	Dehydropipernonaline	2.63	level2			340.193	305.8	POS	C21H25NO3	HMDB0040811	107584-38-3		Alkaloids	Lysine alkaloids	Piperidine alkaloids	KAYVDASZRFLFRZ-PQECNABGSA-N	0.0208699	0.0188735	0.0152543	0.0183326	0.0408309	0.0511066	0.0602254	0.050721	1.29043	0.00516433	0.0210528	2.76671	1.46817
1868	Corydine	2.63	level2			342.173	235.4	POS	C20H23NO4	HMDB0302141			Alkaloids	Tyrosine alkaloids	Aporphine alkaloids	IDQUPXZJURZAGF-ZDUSSCGKSA-N	0.10544	0.101628	0.102515	0.103194	0.482387	0.479784	0.474293	0.478821	1.34234	1.48406e-08	5.28623e-05	4.64	2.21412
1869	Pipercitine	2.63	level2			350.341	563.1	POS	C23H43NO	HMDB0039937			Alkaloids			PPSREOHNKFETQU-LVZFUZTISA-N	0.00148723	0.00104432	0.00144151	0.00132435	0.000105909	0.000210642	0.000113206	0.000143252	1.31188	0.00122416	0.00798351	0.108168	-3.20866
1870	AVOCADYNE	2.63	level2			307.226	466.2	POS	C17H32O3	HMDB0035473	129099-96-3					OHLQBKZXSJYBMK-UHFFFAOYSA-N	0.0131417	0.0139799	0.0207965	0.0159727	0.0384294	0.0592259	0.0380664	0.0452406	1.24761	0.0167584	0.0486812	2.83237	1.50201
1872	1-[2,4,6-trihydroxy-3-[7-hydroxy-2-(4-hydroxyphenyl)-3,4-dihydro-2H-chromen-4-yl]phenyl]dodecan-1-one	2.63	level2			547.266	362.9	NEG	C33H40O7				Shikimates and Phenylpropanoids	Flavonoids	Flavanones	JGXZVDAPLSTBGZ-UHFFFAOYSA-N	1.17468e-05	0.00077263	0.000592366	0.000458914	0.00489514	0.00471976	0.00712109	0.00557866	1.05	0.00315085	0.0149654	12.1562	3.60362
1874	[(2S,3R,4R,5S,6S)-2-[[(1aS,1bS,2S,5aR,6S,6aS)-1a-(hydroxymethyl)-2-[(2S,3R,4S,5S,6R)-3,4,5-trihydroxy-6-(hydroxymethyl)oxan-2-yl]oxy-2,5a,6,6a-tetrahydro-1bH-oxireno[5,6]cyclopenta[1,3-c]pyran-6-yl]oxy]-3,5-dihydroxy-6-methyloxan-4-yl] (E)-3-(3,4-dihydroxyphenyl)prop-2-enoate	2.63	level2			669.208	319.5	NEG	C30H38O17				Terpenoids	Monoterpenoids	Iridoids monoterpenoids	MFIJTASICGGFJA-LAJFDIHTSA-N	0.248398	0.158174	0.234115	0.213562	0.100115	0.0877947	0.100874	0.0962611	1.25291	0.0496474	0.109514	0.45074	-1.14963
1875	7-[(2S,3R,4S,5S,6R)-4,5-dihydroxy-3-[(2R,3R,4R,5R,6S)-3,4,5-trihydroxy-6-methyloxan-2-yl]oxy-6-[[(2R,3R,4R,5R,6S)-3,4,5-trihydroxy-6-methyloxan-2-yl]oxymethyl]oxan-2-yl]oxy-6-methoxychromen-2-one	2.63	level2			691.205	316	NEG	C28H38O17				Shikimates and Phenylpropanoids	Coumarins	Simple coumarins	LLQBCHODNVGKSF-RVXDDWIJSA-N	0.158309	0.134635	0.158781	0.150575	0.312047	0.291494	0.285844	0.296461	1.3222	0.000205169	0.00264806	1.96886	0.977362
1876	Silibinin	2.63	level2			481.112	258.7	NEG	C25H22O10				Shikimates and Phenylpropanoids	Flavonoids	Flavonolignans	SEBFKMXJBCUCAI-HKTJVKLFSA-N	0.0663514	0.0709094	0.0720956	0.0697855	0.131137	0.134784	0.12026	0.128727	1.32902	0.000232742	0.00281246	1.84461	0.883314
1878	Stevioside	2.63	level2			805.384	231.5	POS	C38H60O18	HMDB0034945	57817-89-7	C09189	Terpenoids	Diterpenoids	Tetracyclic diterpenoids	UEDUENGHJMELGK-HYDKPPNVSA-N	2.18929e-06	0.00018483	2.21181e-06	6.30771e-05	0.00156056	0.00219261	0.00190773	0.00188697	1.1687	0.000694046	0.00552374	29.9153	4.90281
1880	Alternariol monomethylether	2.63	level2			273.081	45	POS	C15H12O5				Shikimates and Phenylpropanoids	Coumarins	Isocoumarins	LCSDQFNUYFTXMT-UHFFFAOYSA-N	0.520853	0.517071	0.543661	0.527195	0.767277	0.848993	0.664078	0.760116	1.24405	0.0459714	0.103344	1.44181	0.527883
1883	2'-Deoxyguanosine 5'-diphosphate (dGDP)	2.63	level2			410.024	421.9	POS	C10H15N5O10P2	HMDB0000960		C00361	Carbohydrates	Nucleosides	Purine nucleos(t)ides	CIKGWCTVFSRMJU-KVQBGUIXSA-N	0.0128895	0.0121356	0.0114913	0.0121721	0.0205057	0.0188639	0.0240444	0.021138	1.29124	0.00476941	0.0199136	1.73659	0.796254
1885	Chelirubine	2.63	level2			362.105	322.3	POS	C21H15NO5							RNSBFHHWMMKJAM-UHFFFAOYSA-N	0.0331318	0.0318415	0.0262931	0.0304221	0.177509	0.182866	0.171393	0.177256	1.33801	3.04075e-06	0.000330723	5.82654	2.54264
1886	Daphnetoxin	2.63	level2			483.205	267.9	POS	C27H30O8				Terpenoids	Diterpenoids	Daphnane diterpenoids	LGEROVMQYFTBDI-FFIGBMOQSA-N	0.00132362	0.00129987	0.000753674	0.00112572	0.00239453	0.00217129	0.00250167	0.00235583	1.20543	0.0042427	0.0183619	2.09273	1.06539
1889	[(2R,3R,4S,5R,6R)-6-[2-(3,4-dihydroxyphenyl)ethoxy]-3,5-dihydroxy-4-[(2S,3R,4R,5R,6S)-3,4,5-trihydroxy-6-methyloxan-2-yl]oxyoxan-2-yl]methyl (E)-3-(4-hydroxy-3-methoxyphenyl)prop-2-enoate	2.63	level2			639.232	176.3	POS	C30H38O15				Shikimates and Phenylpropanoids	Phenylpropanoids (C6-C3)	Cinnamic acids and derivatives	OFNCUIXPAFLTJZ-PYQKQGIYSA-N	0.0135327	0.00908877	0.0102122	0.0109446	0.0203025	0.0180239	0.0199503	0.0194256	1.23906	0.00494377	0.0204166	1.77491	0.827743
1891	Flavonol base + 4O, 1MeO	2.63	level2			331.043	419	NEG	C16H12O8	HMDB0126497	53472-37-0	C12633	Shikimates and Phenylpropanoids	Flavonoids	Flavonols	CFYMYCCYMJIYAB-UHFFFAOYSA-N	0.017198	0.0172254	0.0194957	0.017973	0.0213025	0.0212242	0.0202433	0.0209233	1.15901	0.0240809	0.0635922	1.16415	0.219278
1892	2H-Cyclopropa[f]benzofuran-2-one, octahydro-5a-methyl-3-methylene-5-(3-oxobutyl)-, (3aR,4aS,5S,5aR,6aR)-	2.63	level2			271.128	392.4	POS	C15H20O3				Terpenoids	Sesquiterpenoids	Carabrane sesquiterpenoids	AGIQIKMGJVLKMA-NLRWUALESA-N	0.0306816	0.0262628	0.0302182	0.0290542	0.0177011	0.0153324	0.0157158	0.0162498	1.30756	0.00126831	0.008176	0.559291	-0.838328
1893	4-METHYLCATECHOL	2.63	level2			125.059	278.2	POS	C7H8O2	HMDB0000873	452-86-8	C06730				ZBCATMYQYDCTIZ-UHFFFAOYSA-N	0.00603924	0.00645461	0.00610593	0.00619993	0.00557655	0.0048272	0.00499864	0.00513413	1.19723	0.0149993	0.0449173	0.828095	-0.272132
1895	Mundulone	2.63	level2			435.183	269.4	POS	C26H26O6				Shikimates and Phenylpropanoids	Isoflavonoids	Isoflavones	KJTDZAHLWHEULN-UHFFFAOYSA-N	0.00196351	0.00149216	0.0021911	0.00188226	0.00534074	0.00469396	0.00613407	0.00538959	1.29956	0.00164862	0.00974076	2.86337	1.51771
1896	Coumaroyl agmatine (isomer of 1296)	2.63	level2			277.165	266.3	POS	C14H20N4O2				Shikimates and Phenylpropanoids	Phenylpropanoids (C6-C3)	Cinnamic acid amides	AKIHYQWCLCDMMI-UHFFFAOYSA-N	0.00539987	0.00562092	0.00475418	0.00525832	0.00206474	0.00174137	0.00211044	0.00197218	1.32492	0.000322155	0.00341406	0.37506	-1.41481
1897	(2-{[3-(hexadecanoyloxy)-2-[octadeca-9.12-dienoyloxy]propyl phosphono]oxy}ethyl)trimethylazanium	2.63	level2			816.574	166.5	NEG	C42H80NO8P	HMDB0007973	17708-90-6					JLPULHDHAOZNQI-ZTIMHPMXSA-N	2.96096	3.37134	3.23482	3.18904	2.34143	2.47513	2.21359	2.34339	1.27812	0.00402505	0.0176987	0.734825	-0.444527
1899	Allysine	2.63	level2			144.066	391.1	NEG	C6H11NO3	HMDB0001263	1962-83-0	C04076	Amino acids and Peptides	Small peptides	Aminoacids	GFXYTQPNNXGICT-UHFFFAOYSA-N	0.0489114	0.0505014	0.0526352	0.0506827	0.106707	0.100908	0.105181	0.104265	1.33854	1.25669e-05	0.000622688	2.05722	1.04069
1900	2,2-Dimethylsuccinic acid	2.63	level2			145.05	239.5	NEG	C6H10O4	HMDB0002074	597-43-3		Fatty acids	Fatty Acids and Conjugates	Dicarboxylic acids	GOHPTLYPQCTZSE-UHFFFAOYSA-N	0.0228108	0.0248836	0.0251575	0.0242839	0.0161823	0.0168415	0.0160074	0.0163437	1.32332	0.000532731	0.00468362	0.673026	-0.571265
1902	Erythrinasinate_A	2.62	level2			587.502	611.7	POS	C38H66O4	HMDB0038713	102607-46-5					XEOWPOLWKNHXGL-NHQGMKOOSA-N	0.0040246	0.00409692	0.00407085	0.00406413	0.00318988	0.00256889	0.00304911	0.00293596	1.24474	0.0254326	0.0662465	0.722408	-0.469113
1903	2-Palmitoylglycerol	2.62	level2			331.283	526.7	POS	C19H38O4	HMDB0011533			Fatty acids	Glycerolipids	Monoacylglycerols	BBNYCLAREVXOSG-UHFFFAOYSA-N	0.00667494	0.00433713	0.00695858	0.00599022	0.00949707	0.00926359	0.00821008	0.00899025	1.08022	0.0310649	0.0768118	1.50082	0.585753
1904	6-Methoxy-alpha-pyrufuran	2.62	level2			305.104	311.1	POS	C16H16O6	HMDB0041294	167278-44-6	C08761	Shikimates and Phenylpropanoids			ZUMWPOBUQWYISM-UHFFFAOYSA-N	0.113217	0.122592	0.120862	0.11889	0.388323	0.393731	0.374101	0.385385	1.34056	2.14654e-06	0.000292034	3.24152	1.69667
1908	5-undecylbenzene-1,3-diol	2.62	level2			263.201	521.5	NEG	C17H28O2				Polyketides	Aromatic polyketides	Catechols with side chains	SXRLJXDYAKBNRZ-UHFFFAOYSA-N	0.246365	0.272124	0.294069	0.270852	0.171563	0.127171	0.154702	0.151145	1.26873	0.00318472	0.0150758	0.558035	-0.841571
1909	[(3aS,4S,5S,6E,10E,11aR)-6-formyl-5-methoxy-10-methyl-3-methylidene-2-oxo-3a,4,5,8,9,11a-hexahydrocyclodeca[b]furan-4-yl] 2-methylpropanoate	2.62	level2			385.166	392.4	POS	C20H26O6				Terpenoids	Sesquiterpenoids	Germacrane sesquiterpenoids	SKCDPGIEMVQDCR-QZSWEDNISA-N	0.0124761	0.014034	0.0122084	0.0129062	0.0324299	0.0342049	0.022374	0.0296696	1.26937	0.0422108	0.0968218	2.29887	1.20093
1910	Retrorsine	2.62	level2			352.173	308.5	POS	C18H25NO6				Alkaloids	Ornithine alkaloids	Pyrrolizidine alkaloids	BCJMNZRQJAVDLD-CQRYIUNCSA-N	0.0518494	0.0595093	0.0506031	0.0539873	0.0983701	0.0930583	0.0935697	0.0949994	1.31898	0.000229229	0.0027923	1.75966	0.815299
1911	alpha-Pinene_oxide	2.62	level2			153.127	277.5	POS	C10H16O	HMDB0003667	1686-14-2	C02759	Terpenoids	Monoterpenoids	Pinane monoterpenoids	NQFUSWIGRKFAHK-UHFFFAOYSA-N	0.0159216	0.0147802	0.0147772	0.0151597	0.0166082	0.0181643	0.0166976	0.0171567	1.14269	0.034212	0.0825738	1.13173	0.178534
1912	methyl 5-hydroxy-2-(2-hydroxy-6-methoxy-4-methylbenzoyl)-3-methoxybenzoate	2.62	level2			345.101	249.4	NEG	C18H18O7				Polyketides	Aromatic polyketides	Benzophenones	XJOBKBUGVMLSEJ-UHFFFAOYSA-N	0.0186086	0.0129424	0.011384	0.0143117	0.0214679	0.0317145	0.0301506	0.0277777	1.167	0.0253577	0.0661026	1.94091	0.956735
1913	Semilepidinoside_B	2.62	level2			367.149	152.9	POS	C17H22N2O7	HMDB0033108			Alkaloids			ASPNXCICLVYQCJ-UHFFFAOYSA-N	0.0133674	0.0155217	0.016245	0.0150447	0.0798235	0.0761665	0.0749744	0.0769881	1.33827	3.3521e-06	0.000343793	5.11729	2.35538
1914	Gallic acid hexoside	2.62	level2			331.067	128.7	NEG	C13H16O10	HMDB0038728	13405-60-2		Shikimates and Phenylpropanoids	Phenolic acids (C6-C1)	Simple phenolic acids	GDVRUDXLQBVIKP-UHFFFAOYSA-N	0.0480736	0.0277562	0.0318955	0.0359084	0.0784744	0.0825648	0.0741482	0.0783958	1.24172	0.0030943	0.0147796	2.18321	1.12645
1915	Cotoin	2.62	level2			267.058	88.5	POS	C14H12O4				Polyketides	Phloroglucinols	Acyl phloroglucinols	HNJZOHHIXSIJFG-UHFFFAOYSA-N	0.00971254	0.00979923	0.00765501	0.00905559	0.0185896	0.0218684	0.0203045	0.0202542	1.30805	0.00068334	0.00547295	2.23665	1.16134
1917	Spinochalcone_C	2.62	level2			375.198	460.7	POS	C25H26O3				Shikimates and Phenylpropanoids	Flavonoids	Chalcones	UKLAAWWFUMSUTQ-ACCUITESSA-N	0.00358296	0.00251289	0.00339963	0.00316516	0.00795442	0.0069895	0.00836904	0.00777098	1.2968	0.000934319	0.00669245	2.45516	1.29582
1923	4-Coumaroylcholine	2.62	level2			250.143	196.9	POS	C14H20NO3							WRLCNNSWESNISL-UHFFFAOYSA-O	0.178603	0.137295	0.162622	0.159507	0.036483	0.0268609	0.0356922	0.0330121	1.3251	0.000522743	0.00462611	0.206963	-2.27255
1924	Salsoline	2.62	level2			194.117	519.2	POS	C11H15NO2				Alkaloids	Tyrosine alkaloids	Isoquinoline alkaloids	YTPRLBGPGZHUPD-UHFFFAOYSA-N	0.868501	0.897936	0.874754	0.880397	1.09664	1.09316	1.05052	1.08011	1.32361	0.000323086	0.00341925	1.22684	0.294949
1927	Indospicine	2.62	level2			174.123	330.9	POS	C7H15N3O2				Amino acids and Peptides	Small peptides	Aminoacids	SILQDLDAWPQMEL-YFKPBYRVSA-N	0.00801704	0.00972124	0.00799632	0.0085782	0.0136785	0.0134626	0.014657	0.0139327	1.29013	0.00140213	0.00874907	1.6242	0.699727
1928	9-Methoxycamptothecin	2.62	level2			401.107	314	POS	C21H18N2O5				Alkaloids	Tryptophan alkaloids	Pyrroloquinoline alkaloids	XVMZDZFTCKLZTF-NRFANRHFSA-N	0.00685114	0.00687823	0.00685025	0.00685987	0.00176377	0.00165699	0.00217298	0.00186458	1.33197	0.00095561	0.00678949	0.27181	-1.87933
1929	Matairesinol 4'-O-beta-gentiobioside	2.62	level2			705.235	276.9	POS	C32H42O16				Shikimates and Phenylpropanoids	Lignans	Dibenzylbutyrolactone lignans	SSZQYOJANKKXOX-QFYIXHTHSA-N	0.0291058	0.0253664	0.0286216	0.0276979	0.103665	0.103471	0.104329	0.103822	1.33977	3.73019e-07	0.000155993	3.74836	1.90626
1930	salviaflaside	2.62	level2			521.129	181.1	NEG	C24H26O13				Shikimates and Phenylpropanoids	Phenylpropanoids (C6-C3)	Cinnamic acids and derivatives	DSMWJDJWYGMEBO-PRFRQLEPSA-N	0.0251897	0.0303114	0.0264708	0.0273239	0.0761042	0.0587985	0.0719278	0.0689435	1.31435	0.00156414	0.00940487	2.52319	1.33525
1931	Ptaquiloside	2.62	level2			421.183	155.7	POS	C20H30O8				Terpenoids	Sesquiterpenoids	Illudane sesquiterpenoids	GPHSJPVUEZFIDE-YVPLJZHISA-N	0.0199584	0.0201397	0.019482	0.01986	0.0292353	0.0277208	0.0273668	0.0281076	1.33163	0.000168366	0.00236435	1.41529	0.501093
1932	Phillyrin	2.62	level2			579.213	62.8	NEG	C27H34O11				Shikimates and Phenylpropanoids	Lignans	Furofuranoid lignans	KFFCKOBAHMGTMW-UHFFFAOYSA-N	1.91584	2.63	1.75711	2.10099	1.00487	0.940643	0.836109	0.927207	1.27426	0.0126368	0.0397146	0.44132	-1.1801
1933	Adonixanthin/_4-Ketozeaxanthin	2.62	level2			583.413	35.2	POS	C40H54O3				Terpenoids	Carotenoids (C40)	Carotenoids (C40, β-β)	YECXHLPYMXGEBI-ZNQVSPAOSA-N	0.0572642	0.0587999	0.0544831	0.0568491	0.0221457	0.0253519	0.0249668	0.0241548	1.33426	3.5398e-05	0.00102159	0.424894	-1.23483
1934	Aristeromycin	2.62	level2			266.123	430	POS	C11H15N5O3		19186-33-5		Carbohydrates	Nucleosides	Purine nucleos(t)ides	UGRNVLGKAGREKS-GCXDCGAKSA-N	0.177883	0.124498	0.168266	0.156882	0.22873	0.195098	0.236133	0.219987	1.08939	0.0381936	0.0897547	1.40224	0.487733
1936	SCLAREOLIDE	2.61	level2			251.2	467.4	POS	C16H26O2	HMDB0035293	564-20-5		Terpenoids	Diterpenoids	Norlabdane diterpenoids	IMKJGXCIJJXALX-UHFFFAOYSA-N	0.00769028	0.00766697	0.00798269	0.00777998	0.0174308	0.0242705	0.0179999	0.0199004	1.30789	0.0309323	0.0765615	2.5579	1.35496
1937	5,3',5'-Trihydroxy-3,6,7,4'-tetramethoxyflavone	2.61	level2			391.106	448.1	POS	C19H18O9				Shikimates and Phenylpropanoids	Flavonoids	Flavonols	NZFZOWRVVVZRJU-UHFFFAOYSA-N	0.00552744	0.0104995	0.00619146	0.00740614	0.188862	0.283302	0.192426	0.22153	1.329	0.0199816	0.0553568	29.9117	4.90264
1938	Lycofawcine	2.61	level2			324.216	400.4	POS	C18H29NO4				Alkaloids	Lysine alkaloids	Quinolizidine alkaloids	ZHMNKOPAHVBXQW-HCXPVWKYSA-N	0.0171609	0.0188923	0.0194321	0.0184951	0.178112	0.146962	0.168927	0.164667	1.33976	0.00381392	0.0170575	8.90327	3.15433
1939	D-GLUCURONOLACTONE	2.61	level2			175.024	46.7	NEG	C6H8O6				Carbohydrates	Saccharides	Monosaccharides	UYUXSRADSPPKRZ-SKNVOMKLSA-N	0.137842	0.167761	0.173867	0.159823	0.103533	0.0737708	0.0605847	0.0792962	1.21118	0.00885337	0.0307842	0.496149	-1.01115
1941	Betulinic Acid	2.61	level2			457.366	484.2	POS	C30H48O3	HMDB0030094	472-15-1	C08619	Terpenoids	Triterpenoids	Lupane triterpenoids	QGJZLNKBHJESQX-FZFNOLFKSA-N	0.000240548	0.000250408	0.00053271	0.000341222	0.00784265	0.00447098	0.00620594	0.00617319	1.31417	0.0258009	0.0669461	18.0914	4.17723
1945	Hexahydrocurcumin	2.61	level2			373.168	303.4	NEG	C21H26O6	HMDB0302135		C17826	Shikimates and Phenylpropanoids	Diarylheptanoids	Linear diarylheptanoids	RSAHICAPUYTWHW-UHFFFAOYSA-N	0.0178614	0.0150895	0.020461	0.017804	0.0299632	0.0286277	0.029679	0.0294233	1.26747	0.00192384	0.0107803	1.65263	0.724762
1946	Malonyltryptophan	2.61	level2			289.083	279.1	NEG	C14H14N2O5	HMDB0039500	29399-11-9		Amino acids and Peptides	Small peptides	Dipeptides	OVEAWSPZRGBTSS-UHFFFAOYSA-N	0.979534	1.17814	1.18175	1.11314	0.00855673	0.0078049	0.0081572	0.00817294	1.34202	0.00363578	0.0165009	0.00734223	-7.08957
1947	Fallacinol	2.61	level2			301.073	224.9	POS	C16H12O6				Polyketides	Polycyclic aromatic polyketides	Anthraquinones and anthrones	WJXSYUJKJSOJOG-UHFFFAOYSA-N	0.0547093	0.0514754	0.0535134	0.0532327	0.0834699	0.0819162	0.0816114	0.0823325	1.33774	1.23828e-05	0.000618598	1.54665	0.62915
1948	Schisandrin A	2.61	level2			417.233	223	POS	C24H32O6				Shikimates and Phenylpropanoids	Lignans	Dibenzocyclooctadienes lignans	JEJFTTRHGBKKEI-OKILXGFUSA-N	0.0384539	0.039137	0.0364059	0.037999	0.0779381	0.0809704	0.0775336	0.078814	1.33909	7.34044e-06	0.000482359	2.07411	1.05249
1949	Myricetin, 3-Galactopyranoside	2.61	level2			481.103	51.2	POS	C21H20O13	HMDB0034358	15648-86-9		Shikimates and Phenylpropanoids	Flavonoids	Flavonols	FOHXFLPXBUAOJM-MGMURXEASA-N	0.00942063	0.0118348	0.0106865	0.0106473	0.00546459	0.00494394	0.00581551	0.00540801	1.30596	0.00211912	0.011486	0.507923	-0.977317
1950	PC(42:11)	2.61	level2			834.536	608.9	POS	C50H78NO8P							QWSSCOMDYCBTGV-RHWFHEQESA-N	0.00756025	0.00811188	0.0078654	0.00784584	0.000840684	0.00103386	0.00161839	0.00116431	1.31675	1.90921e-05	0.000752	0.148399	-2.75245
1954	Coumaroyl putrescin	2.61	level2			235.143	280.7	POS	C13H18N2O2				Alkaloids	Ornithine alkaloids	Polyamines	CJHDBEPXEKGBDW-UHFFFAOYSA-N	0.0142921	0.0106944	0.0123761	0.0124542	0.00938209	0.00845139	0.00906954	0.00896767	1.17183	0.0315472	0.07769	0.720053	-0.473826
1958	4-hydroxycoumarin	2.61	level2			163.053	372.5	POS	C9H6O3				Shikimates and Phenylpropanoids	Coumarins	Simple coumarins	VXIXUWQIVKSKSA-UHFFFAOYSA-N	0.00403132	0.00378766	0.00341581	0.00374493	0.0211427	0.0190176	0.0188274	0.0196626	1.33919	3.12581e-05	0.000960034	5.25046	2.39244
1959	Nodakenin	2.61	level2			431.126	355.9	POS	C20H24O9				Shikimates and Phenylpropanoids	Coumarins	Furocoumarins	HXCGUCZXPFBNRD-DNLMCPORSA-N	0.000615418	0.000515303	0.000663797	0.000598173	0.001113	0.0011643	0.00090751	0.0010616	1.25758	0.0066997	0.0252538	1.77474	0.82761
1960	(E)-9-(1,3-benzodioxol-5-yl)-1-piperidin-1-ylnon-8-en-1-one [IIN-based on	2.61	level2			382.181	328.2	POS	C21H29NO3	HMDB0030340	30505-89-6		Alkaloids	Lysine alkaloids	Piperidine alkaloids	FAXXHNWVMKTOFF-UXBLZVDNSA-N	0.128156	0.125153	0.124697	0.126002	0.0038509	0.00239704	0.00260832	0.00295209	1.33814	5.00021e-08	7.84881e-05	0.0234289	-5.41557
1968	Ptelatoside_B	2.6	level2			429.175	365.3	POS	C20H28O10	HMDB0034447	90852-99-6		Shikimates and Phenylpropanoids	Phenylpropanoids (C6-C3)	Cinnamic acids and derivatives	DIBOBJSTTKLQQV-UHFFFAOYSA-N	0.0349796	0.0361513	0.0355512	0.0355607	0.0427008	0.0384101	0.0397495	0.0402868	1.1886	0.0227022	0.0608308	1.1329	0.180024
1970	14-(hydroxymethyl)-5,9-dimethyltetracyclo[11.2.1.01,10.04,9]hexadecan-5-ol	2.6	level2			291.233	545.5	NEG	C19H32O2				Terpenoids	Diterpenoids	Norkaurane diterpenoids	LZAZGDZVFQSCFO-UHFFFAOYSA-N	0.0730247	0.0672018	0.0698134	0.0700133	0.0385498	0.0284557	0.0294585	0.0321547	1.3009	0.000475145	0.00435487	0.459265	-1.1226
1972	Ginsenoside Rk2	2.6	level2			605.439	528	POS	C36H60O7				Terpenoids	Triterpenoids	Dammarane and Protostane triterpenoids	WMGBQZAELMGYNO-YMWSGFAJSA-N	0.0173508	0.0166914	0.0195273	0.0178565	0.0616052	0.0521274	0.0619705	0.0585677	1.3323	0.000258171	0.00299395	3.27991	1.71365
1974	4-(3,12,14-trihydroxy-10,13-dimethylhexadecahydro-1H-cyclopenta[a]phenanthren-17-yl)furan-2(5H)-one	2.6	level2			391.243	444.1	POS	C23H34O5				Terpenoids	Steroids	Cardenolides	SHIBSTMRCDJXLN-UHFFFAOYSA-N	0.0169034	0.0231508	0.0165784	0.0188776	0.0333486	0.0461722	0.0304713	0.036664	1.19713	0.0280577	0.0712108	1.9422	0.957694
1976	brassinolide	2.6	level2			503.335	406.3	POS	C28H48O6				Terpenoids	Steroids	Ergostane steroids	IXVMHGVQKLDRKH-KNBKMWSGSA-N	0.000666074	0.00053377	0.000493268	0.000564371	0.0287852	0.0315704	0.0343038	0.0315531	1.34085	0.00260927	0.0132081	55.9085	5.805
1978	Madecassoside	2.6	level2			973.5	332.4	NEG	C48H78O20	HMDB0040122	34540-22-2		Terpenoids	Triterpenoids	Ursane and Taraxastane triterpenoids	BNMGUJRJUUDLHW-UHFFFAOYSA-N	1.17468e-05	1.2935e-05	1.24167e-05	1.23661e-05	0.0874763	0.0883445	0.0833806	0.0864005	1.34235	0.000313765	0.00336539	6986.86	12.7704
1979	1,6-ANHYDRO-B-GLUCOSE	2.6	level2			163.059	313.8	POS	C6H10O5	HMDB0000640	498-07-7		Carbohydrates	Saccharides	Monosaccharides	TWNIBLMWSKIRAT-VFUOTHLCSA-N	0.732805	0.792369	0.786021	0.770398	0.661262	0.710129	0.664049	0.67848	1.18699	0.0203219	0.0560542	0.880687	-0.183299
1981	hirsutanone	2.6	level2			346.164	303.1	POS	C19H20O5				Shikimates and Phenylpropanoids	Diarylheptanoids	Linear diarylheptanoids	VWHYFMQKJYFLCC-DUXPYHPUSA-N	0.00671627	0.00577869	0.00613419	0.00620971	0.00328728	0.00216994	0.00220981	0.00255568	1.27918	0.00132388	0.00841944	0.411561	-1.28082
1982	1,4-naphthalene-dione	2.6	level2			158.036	259.1	NEG	C10H6O2	HMDB0244221		C02617	Polyketides	Naphthalenes	Naphthoquinones	FRASJONUBLZVQX-UHFFFAOYSA-N	0.390742	0.461479	0.451491	0.434571	0.00336583	0.00242796	0.00215784	0.00265054	1.34032	0.00260266	0.0131844	0.00609922	-7.35716
1985	Physagulin_G	2.6	level2			723.321	224.2	POS	C36H50O15	HMDB0039694	148076-22-6		Terpenoids	Steroids	Ergostane steroids	LBNOIKRBLYMNFW-UHFFFAOYSA-N	0.000985625	0.00032583	0.000800012	0.000703822	0.00209743	0.00146085	0.00173157	0.00176328	1.10027	0.0170785	0.049361	2.50529	1.32498
1987	5-HYDROXYMETHYL-2-FURANCARBOXYLIC ACID	2.6	level2			143.035	36.6	POS	C6H6O4	HMDB0002432	6338-41-6	C20448	Polyketides	Cyclic polyketides	Furans	PCSKKIUURRTAEM-UHFFFAOYSA-N	0.447573	0.483769	0.471017	0.467453	0.38724	0.396281	0.426595	0.403372	1.20187	0.0158532	0.0467818	0.862915	-0.21271
1989	Pentose-Hexose + C10H17	2.6	level2			447.228	241.2	NEG	C21H36O10				Terpenoids	Monoterpenoids	Acyclic monoterpenoids	IEGFOTASSBZIBZ-UHFFFAOYSA-N	0.00606752	0.0051269	0.00514024	0.00544489	0.0113374	0.0108809	0.0102335	0.0108173	1.32141	0.000273906	0.00309954	1.98668	0.990363
1990	N-[(4-Hydroxy-3-methoxyphenyl)methyl]octanamide	2.6	level2			280.19	46.1	POS	C16H25NO3	HMDB0036326	58493-47-3		Alkaloids	Pseudoalkaloids	Capsaicins and Capsaicinoids	JYZDUDMWJFJCON-UHFFFAOYSA-N	0.0223954	0.0196332	0.019113	0.0203806	0.0925588	0.0662932	0.106393	0.0884151	1.31584	0.0278379	0.0708101	4.3382	2.1171
1991	Bakuchiol	2.6	level2			279.168	508.2	POS	C18H24O				Shikimates and Phenylpropanoids			LFYJSSARVMHQJB-QIXNEVBVSA-N	0.00140504	0.000851296	0.00106593	0.00110742	0.00564267	0.00573055	0.00625597	0.0058764	1.32299	4.46998e-05	0.00115057	5.30638	2.40773
1993	Maleamic acid	2.6	level2			114.019	406.6	NEG	C4H5NO3				Amino acids and Peptides	Small peptides	Aminoacids	FSQQTNAZHBEJLS-UPHRSURJSA-N	0.117502	0.114223	0.130981	0.120902	0.101599	0.103543	0.0998601	0.101667	1.20097	0.0213316	0.0580682	0.840906	-0.249984
1994	4-hydroxy-5-[(2S,3R,4S,5S,6R)-3,4,5-trihydroxy-6-(hydroxymethyl)oxan-2-yl]oxy-1H-benzo[f][2]benzofuran-3-one	2.6	level2			377.085	386.4	NEG	C18H18O9				Polyketides	Naphthalenes	Naphthalenes and derivatives	SGQJDTLFQCDZGS-UQEKQVNISA-N	0.593569	0.625135	0.58516	0.601288	0.938195	0.960507	0.857231	0.918644	1.31873	0.000704895	0.00558035	1.52779	0.61145
1995	PHENOLPHTHALEIN	2.6	level2			319.099	275.5	POS	C20H14O4	HMDB0256412		C14286	Shikimates and Phenylpropanoids			KJFMBFZCATUALV-UHFFFAOYSA-N	0.0465944	0.041616	0.0473466	0.0451857	0.0516951	0.0518757	0.0562052	0.0532587	1.15596	0.0255347	0.0664398	1.17866	0.237151
1996	15-Acetoxyeremantholide B	2.6	level2			443.158	262.2	POS	C22H28O8				Terpenoids			UNFGCPCUYMXWDG-OOQPEQBFSA-N	0.00800976	0.00835804	0.00790253	0.00809011	0.0372248	0.0370641	0.0380708	0.0374532	1.34198	1.09287e-07	0.000105045	4.62951	2.21086
1998	Confluentic acid	2.6	level2			499.229	170.5	NEG	C28H36O8				Polyketides	Aromatic polyketides	Depsides	UANVCGQMNRTKGM-UHFFFAOYSA-N	0.0233176	0.030956	0.0273812	0.0272183	0.0892834	0.0860194	0.0765636	0.0839555	1.32352	0.000209779	0.00267881	3.08453	1.62505
1999	Sterebin_A	2.6	level2			311.221	86.2	POS	C18H30O4	HMDB0035337	107647-14-3		Terpenoids	Diterpenoids	Labdane diterpenoids	GUVJPXABQYFWPD-BQYQJAHWSA-N	0.0230815	0.0273307	0.0227179	0.0243767	0.108837	0.0757541	0.0757391	0.0867767	1.31305	0.0280334	0.0711696	3.55982	1.8318
2000	5-(5-methoxycarbonyl-5,8a-dimethyl-2-methylidene-3,4,4a,6,7,8-hexahydro-1H-naphthalen-1-yl)-3-methylpentanoic acid	2.6	level2			351.252	36	POS	C21H34O4				Terpenoids	Diterpenoids	Labdane diterpenoids	WTDIRAZPDUAJEB-UHFFFAOYSA-N	0.0410192	0.0449257	0.0475368	0.0444939	0.068745	0.0512143	0.0688305	0.0629299	1.1346	0.0401542	0.0932055	1.41435	0.500139
2001	(5E)-6,10-dimethyl-5,9-undecadien-2-one	2.6	level2			217.158	34.5	POS	C13H22O				Fatty acids	Fatty acyls	Apocarotenoids (Ψ-)	HNZUNIKWNYHEJJ-FMIVXFBMSA-N	0.0238876	0.0260309	0.0259025	0.0252737	0.00245837	0.00334818	0.00439532	0.00340062	1.32446	1.63839e-05	0.000697468	0.134552	-2.89376
2002	Moxonidine	2.6	level2			242.078	425.1	POS	C9H12ClN5O	HMDB0041938	75438-57-2	C07451	Alkaloids			WPNJAUFVNXKLIM-UHFFFAOYSA-N	0.0196184	0.0192314	0.0197686	0.0195395	0.0121711	0.0125038	0.0131597	0.0126115	1.3343	3.10159e-05	0.000955729	0.645439	-0.631647
2003	Lumazine	2.6	level2			163.025	424.4	NEG	C6H4N4O2	HMDB0254198	487-21-8	C03212	Alkaloids	Pseudoalkaloids	pteridine alkaloids	UYEUUXMDVNYCAM-UHFFFAOYSA-N	0.0101899	0.0104384	0.00938995	0.0100061	0.0167932	0.0140158	0.018534	0.0164477	1.2648	0.00890286	0.030902	1.64376	0.717003
2004	Clovamide	2.6	level2			360.105	401.2	POS	C18H17NO7		53755-03-6		Shikimates and Phenylpropanoids	Phenylpropanoids (C6-C3)	Cinnamic acid amides	GPZFXSWMDFBRGS-UXONFWTHSA-N	0.0376352	0.033461	0.0379023	0.0363329	0.0640721	0.0581678	0.0686691	0.0636363	1.31047	0.00125067	0.00809754	1.75148	0.808576
2005	Ziritaxestat	2.6	level2			589.245	133.5	POS	C30H33FN8O2S	HMDB0252755	1628260-79-6	D11844				REQQVBGILUTQNN-UHFFFAOYSA-N	0.0034501	0.00451584	0.00407071	0.00401222	0.000681943	0.000356262	0.000277793	0.000438666	1.30381	0.000426801	0.00405508	0.109333	-3.1932
2008	Santiaguine	2.59	level2			593.386	278.8	POS	C38H48N4O2				Alkaloids	Ornithine alkaloids		OHNNTQXKHRISJP-AAGWKZJCSA-N	0.206893	0.214355	0.216969	0.212739	0.615626	0.687063	0.79248	0.69839	1.33158	0.0107976	0.0354378	3.28285	1.71495
2009	Nigrosporapyrone D	2.59	level2			169.05	223.7	POS	C8H8O4				Polyketides	Cyclic polyketides	2-pyrone derivatives	MELHVRFNTXYFMN-UHFFFAOYSA-N	0.0159477	0.0186885	0.0168194	0.0171519	0.0245115	0.0380263	0.0342574	0.0322651	1.22005	0.021205	0.0578279	1.88114	0.911606
2011	Diatoxanthin	2.59	level2			567.418	561.1	POS	C40H54O2							HNYJHQMUSVNWPV-DRCJTWAYSA-N	0.140801	0.128701	0.157704	0.142402	0.0207272	0.0169475	0.0155186	0.0177311	1.33563	0.00012884	0.00202942	0.124515	-3.00561
2013	Verapamil	2.59	level2			455.295	517.4	POS	C27H38N2O4	HMDB0001850	52-53-9	C07188				SGTNSNPWRIOYBX-UHFFFAOYSA-N	0.228787	0.21299	0.23521	0.225663	0.274945	0.281583	0.316819	0.291116	1.23915	0.0108982	0.0356868	1.29005	0.367425
2016	Dehydroandrographolide	2.59	level2			333.203	439.4	POS	C20H28O4				Terpenoids	Diterpenoids	Labdane diterpenoids	YIIRVUDGRKEWBV-FZOOCBFYSA-N	0.0469707	0.0764693	0.0418234	0.0550878	0.272843	0.267139	0.171169	0.23705	1.2763	0.00632539	0.0242746	4.30314	2.10539
2017	stepharine	2.59	level2			298.143	368.1	POS	C18H19NO3				Alkaloids	Tyrosine alkaloids	Isoquinoline alkaloids	OGJKMZVUJJYWKO-CYBMUJFWSA-N	0.0434018	0.0387356	0.0378113	0.0399829	0.00560862	0.00320944	0.00695705	0.00525837	1.30879	7.09486e-05	0.00146498	0.131515	-2.9267
2020	galbulin	2.59	level2			357.212	212.2	POS	C22H28O4				Shikimates and Phenylpropanoids	Lignans	Arylnaphthalene and aryltetralin lignans	WYBOVISLCPAJFV-QLEMLULZSA-N	0.0198372	0.0200364	0.0189171	0.0195969	0.0502403	0.0473383	0.0467422	0.0481069	1.33993	1.4868e-05	0.000667368	2.45482	1.29562
2021	Camalexin	2.59	level2			201.05	211.4	POS	C11H8N2S	HMDB0038631	135531-86-1		Alkaloids	Tryptophan alkaloids	Simple indole alkaloids	IYODIJVWGPRBGQ-UHFFFAOYSA-N	0.201837	0.198013	0.194169	0.198007	0.241209	0.246044	0.234267	0.240507	1.32009	0.000476029	0.00435955	1.21464	0.280528
2022	alpha-santonin	2.59	level2			247.128	70.5	POS	C15H18O3				Terpenoids	Sesquiterpenoids	Eudesmane sesquiterpenoids	XJHDMGJURBVLLE-YWGZHDIYSA-N	0.245505	0.251269	0.255959	0.250911	0.28029	0.292539	0.279698	0.284175	1.28263	0.00298589	0.0144359	1.13257	0.179606
2024	GSK2636771	2.59	level2			434.164	84.5	POS	C22H22F3N3O3	HMDB0252955	1372540-25-4		Alkaloids	Tryptophan alkaloids	Carboline alkaloids	XTKLTGBKIDQGQL-UHFFFAOYSA-N	0.0112233	0.00948745	0.0103093	0.01034	0.00525299	0.00566521	0.00612694	0.00568171	1.31058	0.00115104	0.00765516	0.549487	-0.863842
2027	(-)-Hygroline	2.59	level2			144.138	275.5	POS	C8H17NO				Alkaloids	Lysine alkaloids		CWMYODFAUAJKIV-HTQZYQBOSA-N	0.0353652	0.0310493	0.0344	0.0336048	0.118396	0.106244	0.114393	0.113011	1.33814	3.12167e-05	0.00095984	3.36294	1.74972
2028	Myricetin	2.59	level2			317.027	482.1	NEG	C15H10O8	HMDB0002755	529-44-2	C10107	Shikimates and Phenylpropanoids	Flavonoids	Flavonols	IKMDFBPHZNJCSN-UHFFFAOYSA-N	0.00472882	0.00407752	0.00461905	0.00447513	0.00985991	0.00882763	0.0111596	0.00994904	1.31556	0.00147542	0.00904522	2.22318	1.15263
2031	gardenoside	2.59	level2			403.124	354.8	NEG	C17H24O11	HMDB0252642			Terpenoids	Monoterpenoids	Iridoids monoterpenoids	XJMPAUZQVRGFRE-UHFFFAOYSA-N	0.0176501	0.0186889	0.0177637	0.0180342	0.0512153	0.0539728	0.0494689	0.0515523	1.33987	1.56969e-05	0.00068225	2.85858	1.5153
2037	Dichloroacetic acid	2.59	level2			126.936	50	NEG	C2H2Cl2O2				Fatty acids	Fatty Acids and Conjugates	Dicarboxylic acids	JXTHNDFMNIQAHM-UHFFFAOYSA-N	0.597591	0.794959	0.726998	0.706516	0.00842419	0.0119855	0.00814818	0.00951931	1.33956	0.00680756	0.0255267	0.0134736	-6.21372
2038	(3Z)-3-butylidene-4-hydroxy-5-[3,4,5-trihydroxy-6-(hydroxymethyl)oxan-2-yl]oxy-4,5,6,7-tetrahydro-2-benzofuran-1-one	2.59	level2			369.151	102.7	POS	C18H26O9				Polyketides	Cyclic polyketides	Phthalide derivatives	PQDPYECVZYAHMX-WTKPLQERSA-N	0.00534997	0.00275741	0.00278047	0.00362928	0.0102106	0.00877262	0.00875278	0.00924533	1.22288	0.00470314	0.0197241	2.54743	1.34904
2039	Butyl_3-hydroxy-2-methylidenebutanoate	2.58	level2			173.117	437.5	POS	C9H16O3	HMDB0040202	22141-40-8		Fatty acids	Fatty esters	Wax monoesters	BGBNIHUXOLZWIB-UHFFFAOYSA-N	0.00925824	0.0120814	0.0105114	0.010617	0.0506405	0.0567016	0.0488587	0.0520669	1.33354	7.87798e-05	0.00154656	4.9041	2.29399
2040	Premarrubiin	2.58	level2			333.203	422.2	POS	C20H28O4				Terpenoids	Diterpenoids	Labdane diterpenoids	OQLCWZJEAYGVQE-TXWGWWACSA-N	0.104283	0.119351	0.109437	0.111023	0.148392	0.133281	0.13637	0.139348	1.22358	0.0113829	0.036829	1.25512	0.327823
2041	Spirostane-3,6-dione	2.58	level2			429.299	397.7	POS	C27H40O4	HMDB0036940	3514-59-8		Terpenoids	Steroids	Spirostane steroids	CGXQJOWMWZPOPV-UHFFFAOYSA-N	0.00793502	0.0094043	0.0105131	0.00928413	0.0211744	0.0177758	0.0220828	0.0203443	1.29606	0.00184179	0.0104709	2.1913	1.13179
2043	Echinenone	2.58	level2			551.421	628.7	POS	C40H54O				Terpenoids	Carotenoids (C40)	Carotenoids (C40, β-β)	QXNWZXMBUKUYMD-QQGJMDNJSA-N	0.0141472	0.0136427	0.0155871	0.014459	0.00300337	0.00297932	0.00286787	0.00295018	1.34057	0.00244565	0.0126552	0.204038	-2.29309
2045	Sinapoylmalate	2.58	level2			207.137	329	POS	C15H16O9				Shikimates and Phenylpropanoids	Phenylpropanoids (C6-C3)	Cinnamic acids and derivatives	DUDGAPSRYCQPBG-UFFNRZRYSA-N	0.0669991	0.0775143	0.078674	0.0743958	0.012254	0.0104666	0.0117301	0.0114836	1.33887	0.00296505	0.0143666	0.154358	-2.69565
2046	Deoxyloganic acid (Not validated)	2.58	level2			359.133	306.1	NEG	C16H24O9	HMDB0037028	92842-56-3	C11647	Terpenoids	Monoterpenoids	Iridoids monoterpenoids	DSXFHNSGLYXPNG-UHFFFAOYSA-N	0.0267633	0.025197	0.0320675	0.0280093	0.06853	0.0637889	0.0619744	0.0647644	1.31972	0.000209401	0.00267637	2.31225	1.2093
2047	Bornyl_formate	2.58	level2			183.137	294.7	POS	C11H18O2	HMDB0038245	7492-41-3		Terpenoids	Monoterpenoids	Camphane monoterpenoids	RDWUNORUTVEHJF-UHFFFAOYSA-N	0.0687901	0.0767274	0.0757067	0.0737414	0.0108588	0.0111861	0.0103505	0.0107985	1.34141	0.00143312	0.0088761	0.146437	-2.77164
2048	Benzoylmalic_acid	2.58	level2			239.054	242	POS	C11H10O6	HMDB0039494	22138-51-8		Shikimates and Phenylpropanoids	Phenolic acids (C6-C1)	Simple phenolic acids	NVPJTXMOQCANSN-UHFFFAOYSA-N	0.290978	0.309934	0.302512	0.301141	0.680482	0.663694	0.629166	0.657781	1.33842	2.44702e-05	0.000851328	2.18429	1.12717
2051	Huperzine A	2.58	level2			265.127	135.7	POS	C15H18N2O				Alkaloids	Pseudoalkaloids	Terpenoid alkaloids	ZRJBHWIHUMBLCN-YQEJDHNASA-N	0.00840983	0.00894086	0.00855544	0.00863538	0.0065211	0.00693239	0.00625427	0.00656925	1.30152	0.00122358	0.00798213	0.760737	-0.39453
2052	gamma-Glutamyltyrosine	2.58	level2			309.109	66.7	NEG	C14H18N2O6	HMDB0011741	7432-23-7		Amino acids and Peptides	Small peptides	Dipeptides	VVLXCWVSSLFQDS-QWRGUYRKSA-N	0.070305	0.0751648	0.0817939	0.0757546	0.106277	0.109142	0.108694	0.108037	1.30118	0.000723541	0.00567629	1.42615	0.512125
2054	7-Hydroxy-3-oxo-cholest-4-en-26-oic acid	2.58	level2			429.297	518.9	NEG	C27H42O4	HMDB0012458	115538-85-7&#13;&#10;&#13;&#10;&#13;&#10;	C17337	Terpenoids	Steroids	Cholestane steroids	SATGKQGFUDXGAX-MYWFJNCASA-N	0.0302052	0.028186	0.0333253	0.0305722	0.0524643	0.047505	0.0604783	0.0534825	1.28374	0.00487497	0.0202231	1.74939	0.806848
2055	(1aS,1bS,2S,5aR,6S,6aS)-6-({6-Deoxy-2-O-[(2E)-3-(4-hydroxyphenyl)-2-propenoyl]-alpha-L-mannopyranosyl}oxy)-1a-(hydroxymethyl)-1a,1b,2,5a,6,6a-hexahydrooxireno[4,5]cyclopenta[1,2-c]pyran-2-yl beta-D-glucopyranoside	2.58	level2			655.227	70.3	POS	C30H38O16				Terpenoids	Monoterpenoids	Iridoids monoterpenoids	XIPQZLUSSJDAIC-UYESFEPRSA-N	0.0138354	0.0261102	0.0245479	0.0214979	0.0401294	0.0636776	0.0666781	0.0568284	1.18517	0.0187082	0.0527872	2.64344	1.40242
2056	Coriamyrtin	2.58	level2			279.125	27.1	POS	C15H18O5				Terpenoids	Sesquiterpenoids	Picrotoxane sesquiterpenoids	BWWDLKVKPVKBGJ-AJKNKLPHSA-N	0.00189401	0.0019433	0.00209203	0.00197645	0.0037858	0.00334737	0.00300211	0.00337843	1.29429	0.0039303	0.0174195	1.70934	0.773442
2057	[(2R,3S,4S,5R,6S)-6-[2,3-dihydroxy-4-[(E)-3-(4-hydroxyphenyl)prop-2-enoyl]phenoxy]-3,4,5-trihydroxyoxan-2-yl]methyl (E)-3-(4-hydroxyphenyl)prop-2-enoate	2.58	level2			603.152	387.1	POS	C30H28O12				Shikimates and Phenylpropanoids	Flavonoids	Chalcones	MXLIDYXKRCYRPL-SVQBVAIGSA-N	0.000389727	0.000451031	0.000513061	0.000451273	0.00205633	0.00185352	0.00197656	0.00196214	1.3332	2.55946e-05	0.00087034	4.34801	2.12035
2058	[4a-hydroxy-7-(hydroxymethyl)-1-[3,4,5-trihydroxy-6-(hydroxymethyl)oxan-2-yl]oxy-5,7a-dihydro-1H-cyclopenta[c]pyran-5-yl] 4-hydroxybenzoate	2.58	level2			481.131	355.6	NEG	C22H26O12				Terpenoids	Monoterpenoids	Iridoids monoterpenoids	RUMMZUFGTMKLMC-UHFFFAOYSA-N	0.00817322	0.00850866	0.00955947	0.00874712	0.0128828	0.0123565	0.0116413	0.0122936	1.27619	0.0030008	0.0144838	1.40544	0.491023
2059	(-)-EGCG-3''-O-Me	2.58	level2			473.105	321.8	POS	C23H20O11	HMDB0038363	83104-87-4		Shikimates and Phenylpropanoids	Flavonoids	Flavan-3-ols	WVRDOLPMKOCJRJ-DENIHFKCSA-N	0.000723194	0.000236828	0.000391484	0.000450502	0.00195005	0.00201998	0.00243907	0.00213637	1.24861	0.00129512	0.00829314	4.74219	2.24555
2060	5-hydroxy-2,2-dimethyl-7,10-bis(2-methylbut-3-en-2-yl)pyrano[3,2-g]chromen-8-one [IIN-based	2.58	level2			381.21	278.8	POS	C24H28O4				Shikimates and Phenylpropanoids	Coumarins	Simple coumarins	LMEKIDFKWUPZGE-UHFFFAOYSA-N	0.00133753	0.00214519	0.00221842	0.00190038	0.00538154	0.00444611	0.00607688	0.00530151	1.26229	0.00348273	0.016029	2.78971	1.48012
2061	Timosaponin A1	2.58	level2			579.394	212.6	POS	C33H54O8	HMDB0030046	14835-43-9	C08886	Terpenoids	Steroids	Spirostane steroids	ZNEIIZNXGCIAAL-UHFFFAOYSA-N	0.00246444	0.00277775	0.00259729	0.00261316	0.00123363	0.00116107	0.0015447	0.00131313	1.29664	0.000941297	0.00672414	0.502508	-0.992781
2064	Pranoprofen	2.58	level2			256.099	231.6	POS	C15H13NO3	HMDB0041996	52549-17-4	D01578				TVQZAMVBTVNYLA-UHFFFAOYSA-N	0.0839057	0.081378	0.081782	0.0823552	0.343482	0.307923	0.346868	0.332757	1.3405	0.00238464	0.0124389	4.04051	2.01454
2065	Prexanthoperol	2.57	level2			315.192	467.6	POS	C20H26O3	HMDB0034712	119817-27-5		Terpenoids	Diterpenoids	Tetracyclic diterpenoids	KVTOPOITUALWOF-UHFFFAOYSA-N	0.0105321	0.0115651	0.0108266	0.0109746	0.0303088	0.039885	0.0308384	0.0336774	1.32344	0.0174501	0.0501385	3.06866	1.61761
2067	Prupaside	2.57	level2			553.224	304.6	POS	C27H36O12	HMDB0038951	126882-52-8		Shikimates and Phenylpropanoids	Lignans	Furanoid lignans	GLRJVMYTCIKGGK-UHFFFAOYSA-N	0.0165432	0.00981854	0.0112241	0.0125286	0.0517707	0.052917	0.0444734	0.0497204	1.30753	0.000372088	0.00372337	3.96855	1.98861
2068	Hydroxyvernolide	2.57	level2			379.138	266.7	POS	C19H22O8				Terpenoids	Sesquiterpenoids	Germacrane sesquiterpenoids	VPZCNCFYAPSUAL-LQLHESBKSA-N	0.0103898	0.00891835	0.00909777	0.00946864	0.0805264	0.0793512	0.0747001	0.0781926	1.341	3.05685e-06	0.000332083	8.25806	3.0458
2071	Cryptotanshinone	2.57	level2			297.151	326.3	POS	C19H20O3				Polyketides	Naphthalenes	Naphthoquinones	GVKKJJOMQCNPGB-JTQLQIEISA-N	0.0624041	0.0443064	0.0452651	0.0506586	0.00370724	0.00385734	0.00413832	0.00390097	1.33652	0.0154109	0.0458219	0.0770051	-3.6989
2072	Peucenin	2.57	level2			259.1	311.3	NEG	C15H16O4				Polyketides	Chromanes	Chromones	DTNGBIGBPPPNNB-UHFFFAOYSA-N	0.0617281	0.0691505	0.0609699	0.0639495	0.160631	0.165104	0.14726	0.157665	1.33305	9.56662e-05	0.00171403	2.46546	1.30186
2073	5,7-dihydroxy-3-[4-hydroxy-2-methoxy-3-(3-methylbut-2-enyl)phenyl]-6-(3-methylbut-2-enyl)-2,3-dihydrochromen-4-one	2.57	level2			437.195	302.1	NEG	C26H30O6				Shikimates and Phenylpropanoids	Isoflavonoids	Isoflavanones	ARNVYCOTFWJTBS-UHFFFAOYSA-N	0.0893558	0.0929128	0.0883615	0.09021	0.162928	0.15705	0.143484	0.154487	1.32729	0.000408566	0.00394723	1.71253	0.77613
2074	Chalcone base + 3O, 1Prenyl	2.57	level2			323.125	260.2	NEG	C20H20O4				Shikimates and Phenylpropanoids	Flavonoids	Chalcones	TVUGLERLRIQATC-UHFFFAOYSA-N	0.0988586	0.116147	0.116122	0.110376	0.00895754	0.0534571	0.0457272	0.0360473	1.03131	0.00752735	0.027422	0.326587	-1.61446
2078	NERYL_ACETATE	2.57	level2			219.133	50.3	POS	C12H20O2				Terpenoids	Monoterpenoids	Acyclic monoterpenoids	HIGQPQRQIQDZMP-FLIBITNWSA-N	0.164082	0.158259	0.157862	0.160067	0.280663	0.352997	0.269367	0.301009	1.29483	0.032213	0.0789078	1.88051	0.911127
2079	Aristolochic acid C	2.57	level2			326.034	264.5	NEG	C16H9NO7		4849-90-5		Alkaloids	Tyrosine alkaloids	Aporphine alkaloids	NBFGYDJKTHENDP-UHFFFAOYSA-N	0.0407288	0.0424768	0.0418209	0.0416755	0.139722	0.150057	0.139498	0.143093	1.34093	0.000954542	0.00678711	3.4335	1.77968
2080	Capreomycin sulfate	2.57	level2			845.271	249.7	NEG	C25H48N14O16S2		1405-37-4		Amino acids and Peptides	Oligopeptides	Cyclic peptides	JLRSDHJLZBDMJX-CYYVUYFKSA-N	0.0457738	0.0301688	0.0409989	0.0389805	0.00681213	0.00788417	0.0110948	0.00859704	1.30144	0.00316963	0.0150251	0.220547	-2.18084
2081	alpha-Viniferin	2.57	level2			679.204	431.1	POS	C42H30O9	HMDB0030603	62218-13-7		Shikimates and Phenylpropanoids	Stilbenoids	Oligomeric stibenes	KUTVNHOAKHJJFL-UHFFFAOYSA-N	0.000587885	0.000491008	0.000621756	0.000566883	0.00286329	0.00247607	0.00286386	0.00273441	1.3348	8.79431e-05	0.00163925	4.82359	2.27011
2082	6-Oxochelerythrine	2.57	level2			364.122	292.2	POS	C21H17NO5				Alkaloids	Tyrosine alkaloids	Isoquinoline alkaloids	IHTXRYTWDARUKX-UHFFFAOYSA-N	0.00166003	0.00222265	0.00180125	0.00189465	0.00397269	0.00414812	0.00484901	0.00432327	1.29964	0.00155235	0.0093588	2.28184	1.19019
2085	Uvedalin	2.57	level2			487.12	280.1	POS	C23H28O9				Terpenoids	Sesquiterpenoids	Germacrane sesquiterpenoids	JIEVJXRUYDZFTD-FOVHWDCHSA-N	0.0304276	0.0202086	0.0266874	0.0257745	0.0018524	0.00191262	0.00291732	0.00222745	1.32633	0.0147323	0.0443286	0.0864205	-3.53248
2086	Physagulin_B	2.57	level2			547.249	114.6	POS	C30H39ClO7	HMDB0041048	146713-97-5		Terpenoids	Steroids	Ergostane steroids	YTYRPIHQJLEEEG-UHFFFAOYSA-N	0.0081198	0.00972013	0.0091151	0.00898501	0.0138473	0.0126655	0.0138313	0.013448	1.28558	0.00184418	0.010482	1.49672	0.581804
2088	meso-dihydroguaiaretic acid	2.57	level2			353.166	483.7	POS	C20H26O4				Shikimates and Phenylpropanoids	Lignans	Dibenzylbutane lignans	ADFOLUXMYYCTRR-ZIAGYGMSSA-N	0.00158418	0.00174195	0.00148592	0.00160402	0.00201252	0.00212965	0.00187054	0.00200424	1.18418	0.0193309	0.054051	1.24951	0.321363
2089	Gardenin B	2.57	level2			381.099	427.1	POS	C19H18O7	HMDB0302154		C15109	Shikimates and Phenylpropanoids	Flavonoids	Flavones	LXEVSYZNYDZSOB-UHFFFAOYSA-N	0.00835069	0.00856775	0.00822299	0.00838048	0.0154889	0.0176141	0.0160791	0.016394	1.33255	0.00525437	0.0212996	1.95622	0.968067
2090	lamalbid	2.57	level2			421.134	401.8	NEG	C17H26O12				Terpenoids	Monoterpenoids	Iridoids monoterpenoids	HHDWDLBSGSYIQQ-GNDDPXJISA-N	0.00128335	0.00161192	0.00155751	0.00148426	0.00194083	0.0020127	0.00237426	0.00210926	1.18153	0.0205878	0.0565871	1.42109	0.506994
2092	Vicine	2.57	level2			305.107	374.5	POS	C10H16N4O7				Carbohydrates			KGNGTSCIQCLKEH-SYCVNHKBSA-N	0.00572946	0.0054944	0.00547709	0.00556698	0.0109888	0.010136	0.01005	0.0103916	1.33594	0.00010013	0.00176114	1.86664	0.900447
2094	Neomangiferin	2.57	level2			585.141	314.1	POS	C25H28O16				Shikimates and Phenylpropanoids	Xanthones	Plant xanthones	VUWOVGXVRYBSGI-IRXABLMPSA-N	0.00836397	0.00717134	0.00819222	0.00790918	0.00624772	0.00641365	0.00678755	0.00648297	1.17588	0.0244219	0.0642638	0.819677	-0.286872
2096	1-Cinnamoylpyrrolidine	2.57	level2			202.122	253.5	POS	C13H15NO				Alkaloids	Lysine alkaloids	Piperidine alkaloids	JSIGICUAXLIURX-CMDGGOBGSA-N	0.00799507	0.00745012	0.00771419	0.0077198	0.000896225	0.000766506	0.00425579	0.00197284	1.12561	0.03518	0.0843169	0.255556	-1.96829
2098	Clusiacyclol A	2.57	level2			363.165	165.4	NEG	C23H24O4				Polyketides	Phloroglucinols	Acyl phloroglucinols	BQIVXBUAUNSLAJ-UHFFFAOYSA-N	0.0212424	0.0273676	0.0218726	0.0234942	0.0634332	0.0874848	0.0719097	0.0742759	1.31164	0.00225195	0.0119599	3.16146	1.66059
2099	3-(2,4-dihydroxyphenyl)-7-hydroxy-6,8-bis(3-methylbut-2-enyl)-2,3-dihydrochromen-4-one	2.57	level2			407.192	100.3	NEG	C25H28O5				Shikimates and Phenylpropanoids	Isoflavonoids	Isoflavanones	QUBRRXBPXPHDJO-UHFFFAOYSA-N	0.0213299	0.021296	0.0213865	0.0213375	0.0339673	0.032599	0.0299882	0.0321848	1.32163	0.0113489	0.0367427	1.50837	0.592994
2101	vasicinone	2.57	level2			225.07	57.2	POS	C11H10N2O2				Alkaloids	Anthranilic acid alkaloids	Quinazoline alkaloids	SDIVYZXRQHWCKF-VIFPVBQESA-N	0.00581676	0.00866296	0.00667613	0.00705195	0.000288227	2.74836e-06	0.000615764	0.000302247	1.06917	0.00143152	0.00887218	0.04286	-4.54422
2102	2-amino-4-oxo-3,7-dihydropyrrolo[2,3-d]pyrimidine-5-carbonitrile	2.57	level2			176.055	100.1	POS	C7H5N5O		69205-79-4	C15996	Alkaloids	Pseudoalkaloids	pteridine alkaloids	FMKSMYDYKXQYRV-UHFFFAOYSA-N	0.0117817	0.0113511	0.0181286	0.0137538	0.0268299	0.0259413	0.0216642	0.0248118	1.18073	0.0150885	0.0451261	1.804	0.851198
2104	Phenmetrazine	2.56	level2			178.122	433.5	POS	C11H15NO	HMDB0014968	134-49-6	C07432	Alkaloids			OOBHFESNSZDWIU-UHFFFAOYSA-N	0.00733804	0.00922828	0.00753592	0.00803408	0.0114796	0.0130146	0.0104995	0.0116646	1.1941	0.018515	0.0523872	1.45189	0.537928
2106	Luteolin_3'-(3''-acetylglucuronide)	2.56	level2			505.099	297.3	POS	C23H20O13	HMDB0038808			Shikimates and Phenylpropanoids	Flavonoids	Flavones	ODVPGHBKUZXZJN-DXGJXXFVSA-N	0.00497936	0.00596075	0.00496481	0.00530164	0.0140811	0.0148626	0.0125526	0.0138321	1.32446	0.000348238	0.0035753	2.60903	1.38351
2107	Corynoline	2.56	level2			368.154	278.9	POS	C21H21NO5				Alkaloids	Tyrosine alkaloids	Isoquinoline alkaloids	IQUGPRHKZNCHGC-TYPHKJRUSA-N	0.0136248	0.0189299	0.012518	0.0150243	0.0406904	0.0550023	0.0517763	0.0491563	1.29782	0.00200991	0.0110964	3.2718	1.71008
2108	Hexose + C13H17O3	2.56	level2			399.166	257.3	NEG	C19H28O9				Terpenoids	Apocarotenoids	Megastigmanes	FUXBESIRIBMOMU-UHFFFAOYSA-N	0.331401	0.398306	0.383026	0.370911	0.0146725	0.00947415	0.00720518	0.0104506	1.33296	0.00285702	0.0140215	0.0281755	-5.14942
2109	(-)-Tylocrebrine	2.56	level2			394.197	223.6	POS	C24H27NO4				Alkaloids	Lysine alkaloids	Indolizidine alkaloids	YFEPHJVWLFGWKH-AWEZNQCLSA-N	0.00872235	0.00879031	0.00933847	0.00895038	0.0199944	0.0198242	0.0209862	0.0202683	1.33914	1.03924e-05	0.000572571	2.26452	1.1792
2111	Heneicosanoic acid	2.56	level2			325.311	621.6	NEG	C21H42O2	HMDB0002345	2363-71-5		Fatty acids	Fatty Acids and Conjugates	Unsaturated fatty acids	CKDDRHZIAZRDBW-UHFFFAOYSA-N	0.0278992	0.0289394	0.0321522	0.0296636	0.0203174	0.0186966	0.016978	0.018664	1.28993	0.00235908	0.0123421	0.629188	-0.668436
2112	Antheraxanthin	2.56	level2			585.426	545.2	POS	C40H56O3				Terpenoids	Carotenoids (C40)	Carotenoids (C40, β-β)	OFNSUWBAQRCHAV-OYQUVCAXSA-N	0.124467	0.103435	0.152887	0.12693	0.0182078	0.0175585	0.0189816	0.0182493	1.33292	0.0168777	0.0489501	0.143775	-2.79811
2113	Ophiopogonoside A	2.56	level2			419.255	542.9	POS	C21H38O8				Terpenoids	Sesquiterpenoids	Eudesmane sesquiterpenoids	DQRUOTCFENUXKV-UHFFFAOYSA-N	0.0164403	0.00877375	0.0147278	0.0133139	0.0257995	0.023286	0.0303672	0.0264843	1.16229	0.0133683	0.0413612	1.98921	0.992198
2115	(1R,4R,6R,10S)-4,12,12-trimethyl-9-methylene-5-oxatricyclo[8.2.0.0.4,6.]dodecane	2.56	level2			221.189	369.5	POS	C15H24O				Terpenoids	Sesquiterpenoids	Caryophyllane sesquiterpenoids	NVEQFIOZRFFVFW-GUIRCDHDSA-N	0.0109331	0.0117729	0.0111826	0.0112962	0.0142192	0.0132441	0.0128392	0.0134341	1.23226	0.0111572	0.0363024	1.18926	0.250065
2117	Australigenin	2.56	level2			431.314	329.6	POS	C27H42O4	HMDB0030066	90865-22-8		Terpenoids	Steroids	Spirostane steroids	XLHFBXMTUNORSV-UHFFFAOYSA-N	0.0144134	0.0185735	0.016377	0.0164546	0.0283265	0.0227326	0.0264853	0.0258481	1.23139	0.00995963	0.0334329	1.57087	0.651565
2120	3,7,4'-Trihydroxyflavone	2.56	level2			269.041	225.5	NEG	C15H10O5	HMDB0034004	2034-65-3	C10037	Shikimates and Phenylpropanoids	Flavonoids	Flavonols	OBWHQJYOOCRPST-UHFFFAOYSA-N	0.00120988	0.00057735	0.000192311	0.000659848	0.00254451	0.00152771	0.00223233	0.00210152	1.05142	0.0269522	0.0691411	3.18485	1.67123
2121	Gypsogenin 3-O-beta-D-glucuronopyranoside	2.56	level2			683.378	222.2	POS	C37H56O10				Terpenoids	Triterpenoids	Oleanane triterpenoids	LHZZULHOQSQSJN-UPGAAKEKSA-N	0.000275091	0.000170984	0.000321935	0.000256003	2.72839e-06	2.74836e-06	2.62293e-06	2.69989e-06	1.33751	0.0296421	0.0741789	0.0105463	-6.56712
2122	Garcimangosone_A	2.56	level2			461.2	437.8	POS	C28H28O6	HMDB0036983			Shikimates and Phenylpropanoids	Xanthones	Plant xanthones	SSITWAPGVBPANU-UHFFFAOYSA-N	0.000380849	0.00026541	0.000282112	0.000309457	0.000480752	0.000752863	0.000770723	0.000668113	1.20139	0.0234019	0.0622276	2.15898	1.11035
2123	tabersonine	2.56	level2			337.186	270.2	POS	C21H24N2O2				Alkaloids	Tryptophan alkaloids	Aspidosperma type	FNGGIPWAZSFKCN-HBMCJLEFSA-N	0.0228156	0.0174844	0.0197008	0.0200003	0.0280915	0.0236525	0.0285497	0.0267645	1.12071	0.037004	0.0876376	1.33821	0.420304
2124	Citrusin_A	2.56	level2			539.209	59.8	POS	C26H34O12	HMDB0039230	105279-09-2		Shikimates and Phenylpropanoids	Lignans	Neolignans	WHKMPWQXESJAPI-ARJAWSKDSA-N	0.0183217	0.0154213	0.0185958	0.0174462	0.0497693	0.0345685	0.0505016	0.0449465	1.28867	0.00653009	0.024816	2.57628	1.36529
2125	Licoricidin	2.56	level2			447.215	421.8	POS	C26H32O5				Shikimates and Phenylpropanoids	Isoflavonoids	Isoflavanones	GBRZTUJCDFSIHM-KRWDZBQOSA-N	0.00319478	0.00313556	0.00315884	0.00316306	0.0103598	0.0161765	0.0108477	0.0124614	1.3133	0.0378643	0.0891811	3.93965	1.97807
2127	euparin	2.56	level2			239.087	328.9	POS	C13H12O3				Shikimates and Phenylpropanoids			OPUFDNZTKHPZHM-UHFFFAOYSA-N	0.147939	0.171945	0.162299	0.160728	0.0586964	0.0547196	0.0515488	0.0549883	1.33501	0.000130268	0.00204136	0.342121	-1.54742
2128	Sternbin	2.56	level2			303.089	327.5	POS	C16H14O6				Shikimates and Phenylpropanoids	Flavonoids	Flavanones	DSAJORLEPQBKDA-UHFFFAOYSA-N	0.0154199	0.0130916	0.013951	0.0141542	0.033512	0.033588	0.0400706	0.0357235	1.32514	0.000693415	0.00552188	2.52388	1.33565
2129	2-phenylfuro[2,3-h]chromen-4-one [IIN-based	2.56	level2			263.073	321.2	POS	C17H10O3				Shikimates and Phenylpropanoids	Flavonoids	Flavones	NQNOTBRHBRJKKH-UHFFFAOYSA-N	0.0187181	0.0100549	0.0130062	0.0139264	0.0973697	0.090418	0.102515	0.0967675	1.32061	4.39896e-05	0.00114011	6.9485	2.7967
2130	7-methoxy-3-(4-methoxyphenyl)-4H-chromen-4-one	2.56	level2			305.084	321	POS	C17H14O4				Shikimates and Phenylpropanoids	Isoflavonoids	Isoflavones	LPNBCGIVZXHHHO-UHFFFAOYSA-N	0.0205344	0.0173436	0.0196382	0.019172	0.130144	0.127758	0.132494	0.130132	1.34071	3.03678e-07	0.000148805	6.7876	2.7629
2133	afzelechin	2.56	level2			273.074	200.6	NEG	C15H14O5				Shikimates and Phenylpropanoids	Flavonoids	Flavan-3-ols	RSYUFYQTACJFML-DZGCQCFKSA-N	0.664871	1.11401	1.06789	0.948922	0.0181867	0.0205277	0.0188169	0.0191771	1.33786	0.0227379	0.0609052	0.0202094	-5.62883
2134	Lusitanicoside	2.56	level2			441.176	102.3	NEG	C21H30O10				Shikimates and Phenylpropanoids	Phenylpropanoids (C6-C3)	Cinnamic acids and derivatives	DAELTTGCCPRYTP-ZLQZEYEISA-N	0.136623	0.162414	0.151199	0.150079	0.121169	0.119756	0.113619	0.118181	1.22358	0.0150962	0.0451444	0.787463	-0.344717
2135	Amoxicillin	2.56	level2			364.095	54.3	NEG	C16H19N3O5S	HMDB0015193	26787-78-0	C06827	Amino acids and Peptides	β-lactams	Penicillins	LSQZJLSUYDQPKJ-NJBDSQKTSA-N	0.152588	0.135987	0.146682	0.145085	0.09382	0.083082	0.0850151	0.0873057	1.31582	0.000599689	0.0050391	0.601754	-0.732755
2138	Physovenine	2.55	level2			263.138	245.9	POS	C14H18N2O3				Alkaloids	Tryptophan alkaloids	Pyrroloindole alkaloids	LXTKNVLLWOLCOV-JSGCOSHPSA-N	0.103913	0.107428	0.104306	0.105216	0.170147	0.181688	0.192494	0.181443	1.32967	0.000311107	0.00334701	1.72449	0.786168
2146	Gymnemagenin	2.55	level2			507.366	436.7	POS	C30H50O6				Terpenoids	Triterpenoids	Oleanane triterpenoids	VKJLHZZPVLQJKG-ABHKXHSUSA-N	0.0016453	0.00217162	0.0016902	0.00183571	0.0030359	0.00358235	0.00379819	0.00347215	1.26718	0.00441784	0.0188869	1.89145	0.919494
2147	aschantin	2.55	level2			401.159	308.5	POS	C22H24O7	HMDB0341133		C17845	Shikimates and Phenylpropanoids	Lignans	Furofuranoid lignans	ONDWGDNAFRAXCN-VUEDXXQZSA-N	0.121996	0.141343	0.142876	0.135405	0.0756762	0.073858	0.0793728	0.0763024	1.31899	0.00102701	0.00710505	0.563512	-0.827483
2148	decyl acetate	2.55	level2			223.169	302	POS	C12H24O2	HMDB0040166	112-17-4		Fatty acids	Fatty esters	Wax monoesters	NUPSHWCALHZGOV-UHFFFAOYSA-N	0.00958957	0.0107958	0.0102535	0.010213	0.0165697	0.0179707	0.0152996	0.0166133	1.30502	0.00164065	0.00970919	1.62669	0.701939
2150	2-O-Rhamnosylvitexin	2.55	level2			579.163	283.7	POS	C27H30O14				Shikimates and Phenylpropanoids	Flavonoids	Flavones	LYGPBZVKGHHTIE-HUBYJIGHSA-N	0.00246262	2.20454e-06	0.000501435	0.000988753	0.0204609	0.0189988	0.0185035	0.0193211	1.01932	4.31209e-05	0.00112779	19.5408	4.28842
2153	(2R,3R)-2-(3,4-dihydroxyphenyl)-3,4-dihydro-2H-chromene-3,5,7-triol [IIN-based on	2.55	level2			598.196	195.8	POS	C15H14O6	HMDB0001871	490-46-0	C09727	Shikimates and Phenylpropanoids	Flavonoids	Flavan-3-ols	PFTAWBLQPZVEMU-UKRRQHHQSA-N	0.000270024	0.000201018	2.21181e-06	0.000157751	0.00221128	0.00408667	0.00351761	0.00327185	1.07426	0.0282293	0.0715131	20.7406	4.37438
2154	Furostane base + 1O, O-Hex, O-Hex-Hex	2.55	level2			919.487	292.1	POS	C45H76O20				Terpenoids	Steroids	Furostane steroids	FRVIYMUWTVFMSJ-UHFFFAOYSA-N	0.00107754	0.000581447	0.000990748	0.000883244	0.000362958	2.74836e-06	2.62293e-06	0.000122776	1.047	0.017388	0.0500041	0.139006	-2.84678
2155	Typhaneoside	2.55	level2			793.2	71.3	POS	C34H42O20				Shikimates and Phenylpropanoids	Flavonoids	Flavonols	POMAQDQEVHXLGT-QDYYQVSOSA-N	0.00216703	0.000939513	0.00123404	0.00144686	0.224126	0.225223	0.218836	0.222728	1.33672	4.05148e-08	7.15551e-05	153.939	7.26621
2158	2-(3,4-dimethoxyphenyl)-7-methoxy-4H-chromen-4-one	2.55	level2			335.094	413.1	POS	C18H16O5				Shikimates and Phenylpropanoids	Flavonoids	Flavones	VSFZYCDPDWSYSS-UHFFFAOYSA-N	0.190364	0.186267	0.19266	0.189764	0.313687	0.311743	0.315639	0.31369	1.34131	5.75321e-07	0.00018029	1.65305	0.725132
2159	1-isothiocyanato-8-methanesulfinyloctane	2.55	level2			234.097	322.2	POS	C10H19NOS2	HMDB0035923	31456-68-5		Fatty acids	Fatty acyls		BCRXKWOQVFKZAG-UHFFFAOYSA-N	0.00602699	0.00552423	0.00575183	0.00576768	0.0275625	0.0258269	0.0268965	0.0267619	1.34153	2.35447e-06	0.000304542	4.63998	2.21412
2160	Gigantol	2.55	level2			275.123	307.5	POS	C16H18O4				Shikimates and Phenylpropanoids	Stilbenoids	Monomeric stilbenes	SDXKZPQOVUDXIY-UHFFFAOYSA-N	0.0656657	0.0555929	0.0587602	0.0600063	0.2273	0.227059	0.232136	0.228832	1.33917	9.87353e-07	0.000220605	3.81346	1.9311
2162	2-(7-methoxy-2-oxochromen-8-yl)-3-methylbut-2-enal	2.55	level2			276.126	220.7	POS	C15H14O4				Shikimates and Phenylpropanoids	Coumarins	Simple coumarins	PBAZKMWQUBDDLZ-UHFFFAOYSA-N	0.00595356	0.00489968	0.0050909	0.00531471	0.00075191	0.000959147	0.00172962	0.00114689	1.27875	0.000692633	0.00551747	0.215795	-2.21226
2163	N-Methylpelletierine	2.55	level2			156.138	216.3	POS	C9H17NO				Alkaloids	Lysine alkaloids	Piperidine alkaloids	TYHJMEIBGDDCPA-SECBINFHSA-N	0.0025559	0.00244592	0.00273291	0.00257824	0.00611982	0.00523191	0.00585858	0.00573677	1.32937	0.00033459	0.00349445	2.22507	1.15385
2164	Hederagenin	2.55	level2			471.348	31.3	NEG	C30H48O4				Terpenoids	Triterpenoids	Oleanane triterpenoids	PGOYMURMZNDHNS-MYPRUECHSA-N	0.0453434	0.0504358	0.0501383	0.0486392	0.0824728	0.0785539	0.0767614	0.0792627	1.3238	0.00020331	0.00263382	1.62961	0.704523
2167	Physapubescin	2.54	level2			531.299	645.3	POS	C30H42O8	HMDB0033796	74747-52-7		Terpenoids	Steroids	Ergostane steroids	QYJHRILRWPBICK-UHFFFAOYSA-N	0.00257454	0.00305296	0.00244965	0.00269238	0.00455533	0.00531146	0.00746374	0.00577685	1.23253	0.0257228	0.0667958	2.14563	1.1014
2168	1,7-Dimethyl-7-(4-methyl-3-penten-1-yl)bicyclo[2.2.1]heptan-2-ol	2.54	level2			205.194	502.1	POS	C15H26O				Terpenoids	Sesquiterpenoids	Campherenane sesquiterpenoids	SGAYOTORECIFCJ-UHFFFAOYSA-N	0.0248223	0.0248235	0.0247129	0.0247862	0.00796672	0.00958717	0.00784831	0.0084674	1.33324	0.00113074	0.00756373	0.341617	-1.54955
2169	Ginsenoside Rg5	2.54	level2			765.47	592	NEG	C42H70O12				Terpenoids	Triterpenoids	Dammarane and Protostane triterpenoids	NJUXRKMKOFXMRX-UHFFFAOYSA-N	0.0327084	0.0330085	0.0339259	0.0332143	0.0118879	0.0122976	0.00775235	0.0106459	1.30022	0.000112857	0.00188237	0.320523	-1.6415
[truncated: 79,751 more rows]
