# Supplementary material for: Multi-omics analysis reveals the specific role of biocontrol reagents against tomato bacterial wilt
Source: Front Plant Sci. 2025 Jul 14;16:1620460. doi: 10.3389/fpls.2025.1620460 (PMC12301371; doi:10.3389/fpls.2025.1620460)
Supplement: Supplementary file 5 [file Table5.xlsx]

## Sheet: Treat4-CK
Gene ID	Treat4_1	Treat4_2	Treat4_3	CK_1	CK_2	CK_3	Fold change	log2FC	p-value	Gene Name
Solyc11g071760_2	4280.68	3957.54	4256.64	409.072	403.96	414.141	10.1811	3.34782	0	Solyc11g071760_2
Solyc01g106630_2	1592.18	1997.53	1696.96	9840.46	9882.75	9919.64	0.178265	-2.48791	3.77038e-202	Solyc01g106630_2
Solyc10g081170_2	4239.12	3817.54	3454.25	980.894	1063.96	969.728	3.81761	1.93267	1.10642e-101	Solyc10g081170_2
Solyc02g063350_1	614.801	558.559	445.012	16.1283	22.5256	12.7428	31.723	4.98746	1.47588e-76	Solyc02g063350_1
Solyc01g099620_3	222.131	200.619	175.273	1271.94	1078.98	1055.1	0.175029	-2.51434	8.74565e-65	Solyc01g099620_3
Solyc01g095770_3	425.632	453.197	358.514	25.6587	22.5256	16.5657	19.1993	4.26298	3.62931e-57	Solyc01g095770_3
Solyc10g011910_3	814.003	860.209	855.88	168.614	185.461	202.611	4.54099	2.18301	6.07668e-51	Solyc10g011910_3
Solyc04g080960_3	1023.24	1024.75	844.499	2328.34	2634.75	2354.23	0.394658	-1.34133	1.80346e-41	Solyc04g080960_3
Solyc05g052050_1	624.833	777.941	797.835	168.614	114.881	89.1997	5.91904	2.56536	4.72354e-34	Solyc05g052050_1
Solyc07g008620_1	83.12	109.691	104.709	477.251	432.492	449.821	0.219151	-2.19	4.07111e-26	EIX1
Solyc06g073245_1	922.918	639.384	450.703	159.084	147.168	135.074	4.55716	2.18814	2.09654e-22	Solyc06g073245_1
Solyc06g068960_1	247.927	178.97	188.931	24.1924	9.01026	21.6628	11.1734	3.482	1.9357e-20	Solyc06g068960_1
Solyc02g070910_2	778.175	772.168	1042.54	367.285	307.1	282.89	2.71365	1.44023	4.82579e-19	Solyc02g070910_2
Solyc10g079890_2	808.27	623.507	871.814	248.522	320.615	315.385	2.60598	1.38183	1.5498e-16	Solyc10g079890_2
Solyc10g079420_1	290.92	239.588	224.213	604.811	600.684	542.844	0.430941	-1.21444	3.18412e-13	Solyc10g079420_1
Solyc07g053170_3	547.445	246.805	366.481	60.8477	110.376	93.0225	4.39161	2.13475	3.93643e-13	Solyc07g053170_3
Solyc06g053930_3	243.628	261.238	229.904	42.5201	79.5906	61.1655	4.00906	2.00326	3.12094e-12	Solyc06g053930_3
Solyc07g053165_1	431.364	487.837	393.796	206.735	174.198	149.728	2.47453	1.30716	2.82104e-11	Solyc07g053165_1
Solyc07g049180_3	470.058	470.517	678.331	216.999	171.195	260.591	2.49632	1.3198	2.02187e-10	Solyc07g049180_3
Solyc06g065560_2	515.917	457.527	402.901	195.006	229.762	222.362	2.12419	1.08691	1.77112e-09	Solyc06g065560_2
Solyc02g077370_1	104.617	56.2889	92.1892	220.664	307.85	278.43	0.314241	-1.67005	3.22027e-09	PTI5
Solyc10g079755_1	113.215	77.9384	111.538	239.725	279.318	371.453	0.340381	-1.55478	3.9013e-09	Solyc10g079755_1
Solyc03g005320_3	83.12	69.2786	132.024	13.929	0	8.91997	12.4155	3.63407	5.84723e-08	Solyc03g005320_3
Solyc01g058720_3	289.487	288.661	229.904	87.9725	108.874	124.242	2.51065	1.32806	6.09408e-08	Solyc01g058720_3
Solyc02g085870_3	31.5283	98.1447	88.7748	8.79725	7.50855	4.45998	10.588	3.40436	7.0684e-08	Solyc02g085870_3
Solyc04g081920_3	139.011	222.269	374.448	80.6415	27.0308	60.5284	4.37887	2.13056	7.48327e-08	Solyc04g081920_3
Solyc02g088560_3	25.7959	43.2991	27.3153	0	0	0	247.544	7.95154	9.43938e-08	Solyc02g088560_3
Solyc06g051920_3	96.0179	98.1447	160.478	29.3242	11.2628	26.1228	5.31502	2.41007	1.25887e-07	Solyc06g051920_3
Solyc03g117490_3	85.9862	66.392	66.0121	243.391	173.447	198.151	0.35447	-1.49626	2.66712e-07	Solyc03g117490_3
Solyc04g080450_1	319.582	157.32	220.799	436.197	529.353	465.75	0.487285	-1.03716	3.57572e-06	Solyc04g080450_1
Solyc08g067260_3	77.3876	47.629	2.27628	0	0	1.27428	93.1167	6.54097	6.64181e-06	Solyc08g067260_3
Solyc08g067410_2	7.16552	49.0723	6.82883	142.222	102.116	119.782	0.171	-2.54794	1.18203e-05	Solyc08g067410_2
Solyc11g010170_2	223.564	261.238	248.114	99.7022	135.905	117.234	2.07788	1.05511	1.19304e-05	Solyc11g010170_2
Solyc01g094960_3	256.525	229.485	256.081	154.685	76.5872	89.8368	2.31289	1.20969	2.50093e-05	Solyc01g094960_3
Solyc06g036420_2	110.349	186.186	159.339	79.9084	52.5598	59.8912	2.37118	1.2456	0.000212121	Solyc06g036420_2
Solyc05g049970_3	2.86621	5.77322	0	56.449	22.5256	31.857	0.0749033	-3.73883	0.000221376	Solyc05g049970_3
Solyc09g083050_3	77.3876	49.0723	36.4204	20.5269	4.50513	5.09712	5.4144	2.4368	0.000618637	Solyc09g083050_3
Solyc04g058170_1	1.4331	17.3196	15.9339	88.7056	40.5462	47.7855	0.197449	-2.34045	0.000978573	Solyc04g058170_1
Solyc05g009280_3	20.0634	0	23.9009	0	0	0	113.199	6.82271	0.0011829	Solyc05g009280_3
Solyc12g008400_2	0	0	0	19.7938	18.0205	7.64569	0.0161604	-5.95139	0.00120198	Solyc12g008400_2
Solyc08g081690_3	54.4579	118.351	29.5916	151.02	175.7	169.479	0.405088	-1.30369	0.00132884	Solyc08g081690_3
Solyc03g006030_3	14.331	14.433	5.69069	0	0	0	88.3441	6.46506	0.00145982	Solyc03g006030_3
Solyc11g072270_2	139.011	168.867	121.781	87.9725	58.5667	64.3512	2.0351	1.0251	0.00156111	Solyc11g072270_2
Solyc01g005370_3	106.05	46.1857	52.3544	20.5269	28.5325	6.37141	3.7038	1.889	0.00209124	Solyc01g005370_3
Solyc12g005540_1	24.3628	0	14.7958	0	0	0	100.675	6.65356	0.00232322	Solyc12g005540_1
Solyc08g081495_1	42.9931	63.5054	113.814	152.486	171.195	143.994	0.474684	-1.07496	0.00289344	Solyc08g081495_1
Solyc03g112150_1	24.3628	25.9795	3.41442	56.449	56.3141	68.8112	0.291803	-1.77694	0.00584547	Solyc03g112150_1
Solyc01g010020_3	64.4896	79.3817	26.1772	152.486	163.686	75.1826	0.432052	-1.21072	0.00597983	Solyc01g010020_3
Solyc01g108190_3	11.4648	63.5054	27.3153	5.86484	1.50171	11.4685	5.3841	2.42871	0.00890093	Solyc01g108190_3
Solyc10g009240_3	77.3876	73.6085	145.682	20.5269	0	5.09712	11.589	3.53469	0.0101309	Solyc10g009240_3
Solyc07g008630_1	17.1972	25.9795	0	64.5132	70.5803	35.6799	0.249266	-2.00424	0.0113635	EIX2
