# Supplementary material for: Multi-omics analysis reveals the specific role of biocontrol reagents against tomato bacterial wilt
Source: Front Plant Sci. 2025 Jul 14;16:1620460. doi: 10.3389/fpls.2025.1620460 (PMC12301371; doi:10.3389/fpls.2025.1620460)
Supplement: Supplementary file 6 [file Table6.xlsx]

## Sheet: Treat1-CK
Gene ID	Treat1_1	Treat1_2	Treat1_3	CK_1	CK_2	CK_3	Fold change	log2FC	p-value	Gene Name
Solyc11g071760_2	5014.45	4416.61	4911.23	429.633	425.745	434.676	11.1136	3.47425	0	Solyc11g071760_2
Solyc05g052050_1	1478.45	1520.34	1578.84	177.089	121.076	93.6224	11.7184	3.5507	1.31669e-93	Solyc05g052050_1
Solyc02g063350_1	496.739	477.82	589.295	16.9389	23.7404	13.3746	29.1729	4.86656	1.09741e-70	Solyc02g063350_1
Solyc10g081170_2	3193.51	2714.3	3353.25	1030.2	1121.34	1017.81	2.92198	1.54695	4.84349e-62	Solyc10g081170_2
Solyc10g011910_3	862.756	1181.05	1222.92	177.089	195.463	212.657	5.57906	2.48002	3.52721e-51	Solyc10g011910_3
Solyc04g080960_3	1077.14	943.9	1116.01	2445.37	2776.84	2470.96	0.407577	-1.29485	8.68124e-43	Solyc04g080960_3
Solyc01g099620_3	287.585	176.101	284.218	1335.87	1137.17	1107.42	0.208444	-2.26227	2.73456e-39	Solyc01g099620_3
Solyc06g073830_1	1090.21	1021.38	1272.46	292.582	260.353	379.84	3.62182	1.85671	1.21956e-31	Solyc06g073830_1
Solyc06g065560_2	694.127	610.483	627.104	204.807	242.152	233.387	2.83844	1.5051	6.45627e-20	Solyc06g065560_2
Solyc02g070910_2	920.274	763.103	880.032	385.746	323.661	296.917	2.54805	1.34939	2.18477e-18	Solyc02g070910_2
Solyc01g058720_3	504.582	341.636	441.971	92.3943	114.745	130.403	3.80987	1.92974	1.29016e-16	Solyc01g058720_3
Solyc02g083850_3	679.748	759.581	629.712	237.915	194.671	296.917	2.83285	1.50225	3.38456e-16	Solyc02g083850_3
Solyc07g008620_1	91.5045	81.0064	174.703	501.239	455.816	472.125	0.242442	-2.04429	4.24586e-15	EIX1
Solyc01g094960_3	371.247	469.602	455.009	162.46	80.7174	94.2912	3.843	1.94223	1.3678e-13	Solyc01g094960_3
Solyc01g095100_3	814.39	697.359	693.595	375.737	322.87	302.267	2.20411	1.1402	2.95314e-13	Solyc01g095100_3
Solyc02g077370_1	568.635	855.85	749.657	231.756	324.452	292.236	2.5636	1.35817	6.9437e-13	PTI5
Solyc07g053170_3	273.206	558.827	357.228	63.906	116.328	97.6348	4.28313	2.09867	1.24047e-12	Solyc07g053170_3
Solyc02g088560_3	86.2756	92.7464	67.795	0	0	0	603.481	9.23717	1.76514e-12	Solyc02g088560_3
Solyc09g059430_3	920.274	729.057	890.462	353.408	485.096	415.951	2.02415	1.01732	1.48527e-10	Solyc09g059430_3
Solyc10g079890_2	588.243	643.355	797.895	261.014	337.905	331.022	2.18158	1.12537	1.71401e-10	Solyc10g079890_2
Solyc07g049180_3	428.764	563.523	692.292	227.906	180.427	273.511	2.46804	1.30337	1.93522e-09	Solyc07g049180_3
Solyc01g005370_3	115.034	169.057	130.375	21.5587	30.0712	6.68732	7.16224	2.84041	6.63387e-09	Solyc01g005370_3
Solyc08g081690_3	47.0594	12.9141	39.1125	158.61	185.175	177.883	0.188835	-2.4048	7.70803e-09	Solyc08g081690_3
Solyc06g068960_1	117.649	119.749	121.249	25.4084	9.49617	22.7369	6.20309	2.63299	1.03291e-08	Solyc06g068960_1
Solyc07g053165_1	427.457	496.604	359.835	217.127	183.593	157.152	2.30451	1.20446	1.62903e-08	Solyc07g053165_1
Solyc03g006080_3	294.122	352.202	251.624	147.831	97.3357	114.353	2.49912	1.32142	2.38425e-07	Solyc03g006080_3
Solyc06g036420_2	205.231	150.273	276.395	83.9248	55.3943	62.8608	3.12355	1.64318	4.45772e-07	Solyc06g036420_2
Solyc04g081920_3	193.467	196.059	216.423	84.6947	28.4885	63.5295	3.42511	1.77615	1.2349e-06	Solyc04g081920_3
Solyc01g095770_3	128.106	46.9602	191.651	26.9483	23.7404	17.387	5.39008	2.43031	2.56862e-06	Solyc01g095770_3
Solyc03g007890_3	35.2946	39.9162	33.8975	123.192	113.954	143.109	0.28709	-1.80043	2.78385e-06	Solyc03g007890_3
Solyc06g071280_3	103.269	110.356	196.866	305.671	302.295	371.146	0.418673	-1.2561	3.59608e-06	Solyc06g071280_3
Solyc10g079755_1	152.943	151.447	96.4775	251.774	294.381	389.871	0.42834	-1.22317	4.81373e-06	Solyc10g079755_1
Solyc06g053930_3	128.106	239.497	217.726	44.6572	83.8828	64.1982	3.03989	1.60402	4.9382e-06	Solyc06g053930_3
Solyc02g085870_3	26.1441	110.356	50.8463	9.23943	7.91347	4.68112	8.63039	3.10943	1.89431e-05	Solyc02g085870_3
Solyc01g006840_3	18.3009	5.87003	0	96.244	41.1501	92.285	0.10486	-3.25347	3.06567e-05	Solyc01g006840_3
Solyc01g096820_3	74.5108	126.793	106.908	38.4976	25.3231	27.418	3.38228	1.758	6.89172e-05	Solyc01g096820_3
Solyc05g013320_1	18.3009	23.4801	24.7713	152.451	84.6742	52.1611	0.230376	-2.11794	7.11378e-05	Solyc05g013320_1
Solyc12g088850_1	15.6865	9.39204	33.8975	0	0	0	144.041	7.17033	7.21493e-05	Solyc12g088850_1
Solyc03g093240_3	41.8306	43.4382	29.9863	5.38967	0	0	21.6845	4.43859	0.000110847	Solyc03g093240_3
Solyc12g005030_2	2.61441	0	0	50.0469	22.1577	22.0681	0.0270548	-5.20797	0.000276039	Solyc12g005030_2
Solyc03g006100_3	124.185	21.1321	10.43	7.69952	0	4.01239	13.2579	3.72878	0.000400702	Solyc03g006100_3
Solyc06g075550_3	218.304	181.971	176.006	73.9154	75.178	123.715	2.10753	1.07555	0.000505063	Solyc06g075550_3
Solyc04g058170_1	15.6865	18.7841	10.43	93.1642	42.7328	50.1549	0.241953	-2.0472	0.00116805	Solyc04g058170_1
Solyc12g008400_2	0	0	0	20.7887	18.9923	8.02478	0.0145555	-6.10229	0.00137048	Solyc12g008400_2
Solyc06g051920_3	73.2036	46.9602	123.856	30.7981	11.8702	27.418	3.47233	1.79591	0.00146273	Solyc06g051920_3
Solyc03g112150_1	20.9153	4.69602	23.4675	59.2863	59.3511	72.223	0.255581	-1.96815	0.00230919	Solyc03g112150_1
Solyc03g006030_3	18.3009	10.566	6.51875	0	0	0	86.4789	6.43428	0.00241636	Solyc03g006030_3
Solyc04g049160_3	36.6018	39.9162	59.9725	106.253	88.6309	126.39	0.424214	-1.23714	0.00253108	Solyc04g049160_3
Solyc07g008600_1	67.9748	108.008	5.215	13.8591	3.16539	14.7121	5.69857	2.5106	0.00418893	Solyc07g008600_1
Solyc03g005040_1	18.3009	25.8281	20.86	0	0	4.01239	15.7028	3.97295	0.00567039	Solyc03g005040_1
Solyc02g086990_3	32.6802	58.7003	58.6688	16.9389	8.70482	17.387	3.48144	1.79968	0.0063239	Solyc02g086990_3
Solyc07g066220_3	27.4513	29.3501	35.2013	103.174	68.8472	55.5047	0.404519	-1.30572	0.008817	Solyc07g066220_3
Solyc07g042460_2	50.9811	112.705	83.44	18.4789	54.603	13.3746	2.87025	1.52118	0.0099369	Solyc07g042460_2
