# Supplementary material for: Multi-omics analysis reveals the specific role of biocontrol reagents against tomato bacterial wilt
Source: Front Plant Sci. 2025 Jul 14;16:1620460. doi: 10.3389/fpls.2025.1620460 (PMC12301371; doi:10.3389/fpls.2025.1620460)
Supplement: Supplementary file 7 [file Table7.xlsx]

## Sheet: Sheet1
	ID	MS2 name	MS2 score	level	MS1 name	MS1 ppm	mz	rt	type	Formula	HMDB	CAS	KEGG COMPOUND ID	Super.Class	Class	Sub.Class	INCHIKEY	CK_1	CK_2	CK_3	MEAN CK	Treat4_1	Treat4_2	Treat4_3	MEAN Treat4	VIP	P-Value	Q-Value	Fold_Change	Log_Foldchange
Pantothenate and CoA biosynthesis	677	3-Ureidopropionic acid	3.86	level1			131.046	54	NEG	C4H8N2O3	HMDB0000026	462-88-4	C02642	Amino acids and Peptides	Small peptides	Aminoacids	JSJWCHRYRHKBBW-UHFFFAOYSA-N	0.23181	0.229629	0.24822	0.236553	0.366387	0.380886	0.34463	0.363968	1.32109	0.000454045	0.00422306	1.53863	0.621647
	1152	Dihydrouracil	3.68	level1			115.05	112.6	POS	C4H6N2O2	HMDB0000076	504-07-4	C00429	Alkaloids	Lysine alkaloids		OIVLITBTBDPEFK-UHFFFAOYSA-N	0.00967887	0.0110668	0.0105618	0.0104358	0.000445515	0.000488366	0.00117167	0.000701849	1.30971	3.18052e-05	0.00104452	0.0672538	-3.89424
	440	beta-Alanine	3.9	level1			88.0404	51.7	NEG	C3H7NO2	HMDB0000056	107-95-9	C00099	Amino acids and Peptides	Small peptides	Aminoacids	UCMIRNVEIXFBKS-UHFFFAOYSA-N	0.161314	0.125895	0.146894	0.144701	0.19416	0.22125	0.188704	0.201371	1.18854	0.0169778	0.0478325	1.39164	0.476782
	41	Pantothenic acid	3.97	level1			218.103	185.6	NEG	C9H17NO5	HMDB0000210	79-83-4	C00864	Amino acids and Peptides	Small peptides	Dipeptides	GHOKWGTUZJEAQD-ZETCQYMHSA-N	1.44905	1.80961	2.134	1.79755	3.36989	2.88334	3.0599	3.10438	1.22983	0.00583061	0.0222894	1.727	0.788268
	595	alpha-Ketoisovaleric acid	3.88	level1			115.04	68.6	NEG	C5H8O3	HMDB0000019	759-05-7	C00141	Fatty acids	Fatty Acids and Conjugates	Branched fatty acids	QHKABHOOEWYVLI-UHFFFAOYSA-N	4.01059	4.54639	4.31916	4.29205	6.34327	6.80118	6.21861	6.45436	1.30985	0.00078175	0.00592222	1.50379	0.588607
Glycine, serine and threonine metabolism	763	Choline	3.84	level1			104.106	43.7	POS	C5H14NO	HMDB0000097	62-49-7	C00114				OEYIOHPDSNJKLS-UHFFFAOYSA-N	8.94123	8.81194	8.96052	8.90456	14.3359	14.9909	13.9251	14.4173	1.33603	0.00264365	0.0130168	1.61909	0.695185
	1013	Glycine	3.74	level1			74.0247	415.7	NEG	C2H5NO2	HMDB0000123	56-40-6	C00037	Amino acids and Peptides	Small peptides	Aminoacids	DHMQDGOQFOQNFH-UHFFFAOYSA-N	0.0567574	0.0581951	0.0559857	0.0569794	0.0683827	0.0658085	0.0606157	0.0649356	1.16249	0.0285389	0.0705093	1.13963	0.18857
	521	5,10-methylene-THF	3.89	level1			456.163	135.5	NEG	C20H23N7O6	HMDB0001533	31690-11-6	C00143	Alkaloids	Histidine alkaloids	Imidazole alkaloids	QYNUQALWYRSVHF-PZORYLMUSA-N	0.0112742	0.00971274	0.011145	0.0107107	0.017439	0.0156917	0.0168849	0.0166718	1.29862	0.00115186	0.00757209	1.55657	0.638367
	466	Betaine	3.9	level1			118.086	46.7	POS	C5H11NO2	HMDB0000043	107-43-7	C00719	Amino acids and Peptides	Small peptides	Aminoacids	KWIUHFFTVRNATP-UHFFFAOYSA-N	4.44467	4.25147	4.38628	4.36081	6.21144	6.20732	5.90586	6.1082	1.33093	0.000114081	0.00195743	1.4007	0.486153
	530	3-Hydroxypyruvic acid	3.89	level1			103.003	409.6	NEG	C3H4O4	HMDB0001352	1113-60-6	C00168	Fatty acids	Fatty Acids and Conjugates		HHDDCCUIIUWNGJ-UHFFFAOYSA-N	10.2034	11.2521	10.7489	10.7348	7.91101	7.67579	7.97953	7.85544	1.31641	0.000809222	0.00603899	0.731771	-0.450535
	531	Pyruvaldehyde	3.89	level1			71.0138	393	NEG	C3H4O2	HMDB0001167	78-98-8	C00546	Fatty acids	Fatty acyls	Fatty aldehydes	AIJULSRZWUXGPQ-UHFFFAOYSA-N	0.41237	0.442183	0.433975	0.429509	0.285517	0.279073	0.269283	0.277958	1.33135	0.000113416	0.00195254	0.647152	-0.627824
Phenylalanine metabolism	995	Phenylpyruvic acid	3.74	level1			163.04	245.9	NEG	C9H8O3	HMDB0000205	156-06-9	C00166	Shikimates and Phenylpropanoids	Phenylpropanoids (C6-C3)	Cinnamic acids and derivatives	BTNMPGBKDVTSJY-UHFFFAOYSA-N	0.217585	0.230659	0.225849	0.224698	0.206844	0.19883	0.1993	0.201658	1.24809	0.00754329	0.0266514	0.897462	-0.156077
	459	2-Phenylacetamide	3.9	level1			136.075	251.1	POS	C8H9NO	HMDB0010715	103-81-1	C02505	Alkaloids	Peptide alkaloids	Simple amide alkaloids	LSBDFXRDZJMBSC-UHFFFAOYSA-N	0.0252945	0.0286484	0.026977	0.0269733	0.0200732	0.0189317	0.0176671	0.0188907	1.2887	0.0024672	0.0124417	0.700347	-0.513857
	706	4-Hydroxycinnamic acid	3.85	level1			163.04	294.1	NEG	C9H8O3	HMDB0002035	7400-08-0	C00811	Shikimates and Phenylpropanoids	Phenylpropanoids (C6-C3)	Cinnamic acids and derivatives	NGSWKAQJJWESNS-ZZXKWVIFSA-N	0.0745474	0.0670613	0.0760695	0.0725594	0.027716	0.0300165	0.0483728	0.0353684	1.21142	0.00636164	0.0236798	0.487441	-1.0367
