# Supplementary material for: Multi-omics analysis reveals the specific role of biocontrol reagents against tomato bacterial wilt
Source: Front Plant Sci. 2025 Jul 14;16:1620460. doi: 10.3389/fpls.2025.1620460 (PMC12301371; doi:10.3389/fpls.2025.1620460)
Supplement: Supplementary file 8 [file Table8.xlsx]

## Sheet: Sheet1
	ID	MS2 name	MS2 score	level	MS1 name	MS1 ppm	mz	rt	type	Formula	HMDB	CAS	KEGG COMPOUND ID	Super.Class	Class	Sub.Class	INCHIKEY	CK_1	CK_2	CK_3	MEAN CK	Treat1_1	Treat1_2	Treat1_3	MEAN Treat1	VIP	P-Value	Q-Value	Fold_Change	Log_Foldchange
Pantothenate and CoA biosynthesis	677	3-Ureidopropionic acid	3.86	level1			131.046	54	NEG	C4H8N2O3	HMDB0000026	462-88-4	C02642	Amino acids and Peptides	Small peptides	Aminoacids	JSJWCHRYRHKBBW-UHFFFAOYSA-N	0.23181	0.229629	0.24822	0.236553	0.100192	0.0828445	0.0886847	0.0905737	1.33158	4.72977e-05	0.00118308	0.38289	-1.385
	1152	Dihydrouracil	3.68	level1			115.05	112.6	POS	C4H6N2O2	HMDB0000076	504-07-4	C00429	Alkaloids	Lysine alkaloids		OIVLITBTBDPEFK-UHFFFAOYSA-N	0.00967887	0.0110668	0.0105618	0.0104358	0.00865523	0.00817768	0.00896898	0.00860063	1.20495	0.0170203	0.049235	0.824144	-0.279032
	595	alpha-Ketoisovaleric acid	3.88	level1			115.04	68.6	NEG	C5H8O3	HMDB0000019	759-05-7	C00141	Fatty acids	Fatty Acids and Conjugates	Branched fatty acids	QHKABHOOEWYVLI-UHFFFAOYSA-N	4.01059	4.54639	4.31916	4.29205	3.46626	3.51272	3.2472	3.40873	1.25604	0.00732134	0.0268846	0.794197	-0.332432
Glycine, serine and threonine metabolism	763	Choline	3.84	level1			104.106	43.7	POS	C5H14NO	HMDB0000097	62-49-7	C00114				OEYIOHPDSNJKLS-UHFFFAOYSA-N	8.94123	8.81194	8.96052	8.90456	13.3807	13.0677	12.298	12.9155	1.32998	0.00556299	0.0221586	1.45043	0.536484
	1013	Glycine	3.74	level1			74.0247	415.7	NEG	C2H5NO2	HMDB0000123	56-40-6	C00037	Amino acids and Peptides	Small peptides	Aminoacids	DHMQDGOQFOQNFH-UHFFFAOYSA-N	0.0567574	0.0581951	0.0559857	0.0569794	0.04999	0.0519811	0.0448746	0.0489486	1.15623	0.0221917	0.0598187	0.859057	-0.219174
	521	5,10-methylene-THF	3.89	level1			456.163	135.5	NEG	C20H23N7O6	HMDB0001533	31690-11-6	C00143	Alkaloids	Histidine alkaloids	Imidazole alkaloids	QYNUQALWYRSVHF-PZORYLMUSA-N	0.0112742	0.00971274	0.011145	0.0107107	0.0265048	0.021072	0.0213895	0.0229888	1.30865	0.00256937	0.0130805	2.14635	1.10188
	466	Betaine	3.9	level1			118.086	46.7	POS	C5H11NO2	HMDB0000043	107-43-7	C00719	Amino acids and Peptides	Small peptides	Aminoacids	KWIUHFFTVRNATP-UHFFFAOYSA-N	4.44467	4.25147	4.38628	4.36081	3.68721	3.7582	3.54056	3.66199	1.30142	0.00124214	0.00806035	0.83975	-0.251968
	530	3-Hydroxypyruvic acid	3.89	level1			103.003	409.6	NEG	C3H4O4	HMDB0001352	1113-60-6	C00168	Fatty acids	Fatty Acids and Conjugates		HHDDCCUIIUWNGJ-UHFFFAOYSA-N	10.2034	11.2521	10.7489	10.7348	7.61031	7.51967	7.20245	7.44415	1.32195	0.000548952	0.00476315	0.693457	-0.528121
	531	Pyruvaldehyde	3.89	level1			71.0138	393	NEG	C3H4O2	HMDB0001167	78-98-8	C00546	Fatty acids	Fatty acyls	Fatty aldehydes	AIJULSRZWUXGPQ-UHFFFAOYSA-N	0.41237	0.442183	0.433975	0.429509	0.332389	0.337898	0.312258	0.327515	1.3078	0.000992672	0.0069528	0.762533	-0.391128
Phenylalanine metabolism	995	Phenylpyruvic acid	3.74	level1			163.04	245.9	NEG	C9H8O3	HMDB0000205	156-06-9	C00166	Shikimates and Phenylpropanoids	Phenylpropanoids (C6-C3)	Cinnamic acids and derivatives	BTNMPGBKDVTSJY-UHFFFAOYSA-N	0.217585	0.230659	0.225849	0.224698	0.15073	0.156533	0.155811	0.154358	1.33492	7.6752e-05	0.00152616	0.686957	-0.541709
	459	2-Phenylacetamide	3.9	level1			136.075	251.1	POS	C8H9NO	HMDB0010715	103-81-1	C02505	Alkaloids	Peptide alkaloids	Simple amide alkaloids	LSBDFXRDZJMBSC-UHFFFAOYSA-N	0.0252945	0.0286484	0.026977	0.0269733	0.0403084	0.0499482	0.0380058	0.0427541	1.24584	0.0140254	0.04281	1.58505	0.66453
	706	4-Hydroxycinnamic acid	3.85	level1			163.04	294.1	NEG	C9H8O3	HMDB0002035	7400-08-0	C00811	Shikimates and Phenylpropanoids	Phenylpropanoids (C6-C3)	Cinnamic acids and derivatives	NGSWKAQJJWESNS-ZZXKWVIFSA-N	0.0745474	0.0670613	0.0760695	0.0725594	0.0137712	0.0177723	0.0178287	0.0164574	1.33205	5.41894e-05	0.00127117	0.226813	-2.14043
